# Supplementary material for: Joint analysis of proteome, transcriptome, and multi-trait analysis to identify novel Parkinson’s disease risk genes
Source: publisher site journal article supplement (doi:10.18632/aging.205444), 2024-01-17
Supplement: Supplementary file [file aging-v16i2-205444-supplementary-material-SD24.pdf]

**Supplementary Table 25. Characteristics of discovery (ROS/MAP) proteomic dataset.**

|        | <b>Female N</b> | <b>Male N</b> | <b>Age at death</b> | <b>pQTL N</b> | <b>Weights N</b> |
|--------|-----------------|---------------|---------------------|---------------|------------------|
| ROSMAP | 262             | 114           | 89.4(6.4)           | 8356          | 1475             |
| Banner | 87              | 65            | 85.5 (7.1)          | 8168          | 1139             |
