# Supplementary material for: Joint analysis of proteome, transcriptome, and multi-trait analysis to identify novel Parkinson’s disease risk genes
Source: Aging (Albany NY). 2024 Jan 17;16(2):1555–80. doi: 10.18632/aging.205444 (PMC10866412; doi:10.18632/aging.205444)
Supplement: Supplementary Table 3 [file aging-16-205444-s003.xlsx]

## Sheet: Sheet1
		Supplementary Tabel 3. The PWAS of PD integrating the ROS/MAP proteomes with the PD GWAS.
PANEL	FILE	ID	CHR	P0	P1	HSQ	BEST.GWAS.ID	BEST.GWAS.Z	EQTL.ID	EQTL.R2	EQTL.Z	EQTL.GWAS.Z	NSNP	NWGT	MODEL	MODELCV.R2	MODELCV.PV	PWAS.Z	PWAS.P
NA	./WEIGHTS//train_weights/Q9BSA9.ENSG00000127419.wgt.RDat	ENSG00000127419.TMEM175	4	926175	952444	0.0714	rs6599389	6.69	rs11724804	0.02778	3.97	-5.516	104	104	blup	0.043	0.00034	-9.3578	8.14e-21
NA	./WEIGHTS//train_weights/P28907.ENSG00000004468.wgt.RDat	ENSG00000004468.CD38	4	15779898	15854853	0.1843	rs4698412	-7.49	rs4698412	0.10493	6.58	-7.487	166	166	bslmm	0.11	3.1e-11	-6.5781	4.77e-11
NA	./WEIGHTS//train_weights/O14966.ENSG00000117280.wgt.RDat	ENSG00000117280.RAB7L1	1	205737114	205744588	0.0681	rs2153904	6.24	rs823114	0.017972	-4.75	-5.87	92	92	bslmm	0.034	0.00033	6.0371	1.57e-09
NA	./WEIGHTS//train_weights/Q6DKK2.ENSG00000011295.wgt.RDat	ENSG00000011295.TTC19	17	15902694	15948329	0.0322	rs4566208	5.5	rs758853	0.0281	-3.88	5.106	73	1	top1	0.028	0.00065	-5.106	3.29e-07
NA	./WEIGHTS//train_weights/Q14956.ENSG00000136235.wgt.RDat	ENSG00000136235.GPNMB	7	23275586	23314727	0.1965	rs466225	-5.87	rs199357	0.192332	-8.67	-5.561	89	17	enet	0.21	3.3e-19	5.0611	4.17e-07
NA	./WEIGHTS//train_weights/P52797.ENSG00000143590.wgt.RDat	ENSG00000143590.EFNA3	1	155036224	155060014	0.0467	rs1462855	5.36	rs3766916	0.018907	-3.72	4.636	88	88	bslmm	0.024	0.0015	-5.0514	4.39e-07
NA	./WEIGHTS//train_weights/O75146.ENSG00000130787.wgt.RDat	ENSG00000130787.HIP1R	12	123319000	123347507	0.134	rs11060180	-4.99	rs11060180	0.052376	4.6	-4.989	65	3	lasso	0.055	2.6e-06	-4.435	9.21e-06
NA	./WEIGHTS//train_weights/Q12846.ENSG00000103496.wgt.RDat	ENSG00000103496.STX4	16	31044210	31054296	0.0427	rs1458202	-6.38	rs7294	0.0243	-3.78	-4.844	66	7	enet	0.032	0.00028	4.23898	2.25e-05
NA	./WEIGHTS//train_weights/Q30154.ENSG00000198502.wgt.RDat	ENSG00000198502.HLA-DRB5	6	32485120	32498064	0.0734	rs660895	-5	rs502771	-0.003829	-2.65	1.79	12	5	enet	0.023	0.016	-4.191	2.78e-05
NA	./WEIGHTS//train_weights/P15289.ENSG00000100299.wgt.RDat	ENSG00000100299.ARSA	22	51061182	51066607	0.2361	rs6151429	-3.94	rs6151429	0.147307	-7.99	-3.937	97	4	lasso	0.16	2.3e-15	4.123	3.74e-05
NA	./WEIGHTS//train_weights/Q8NFF5.ENSG00000160688.wgt.RDat	ENSG00000160688.FLAD1	1	154955814	154965587	0.0318	rs1462855	5.36	rs6696397	-0.002534	3.34	2.52	74	74	bslmm	0.012	0.02	4.0959	4.2e-05
NA	./WEIGHTS//train_weights/Q8TC26.ENSG00000152128.wgt.RDat	ENSG00000152128.TMEM163	2	135213330	135476570	0.0329	rs6430538	-6.999	rs6430538	0.021041	-3.93	-6.999	204	204	bslmm	0.028	0.00068	4.0263	5.67e-05
NA	./WEIGHTS//train_weights/P46459.ENSG00000073969.wgt.RDat	ENSG00000073969.NSF	17	44668035	44834830	0.1746	rs199452	-9.41	rs7226263	-9.36e-05	4.65	-1.484	54	54	blup	0.071	9.4e-08	-3.93587	8.29e-05
NA	./WEIGHTS//train_weights/Q5S007.ENSG00000188906.wgt.RDat	ENSG00000188906.LRRK2	12	40590546	40763087	0.1294	rs1491932	-4.79	rs10878220	0.030533	-3.84	-0.371	194	194	blup	0.092	2.6e-06	3.8235	0.000132
NA	./WEIGHTS//train_weights/P07858.ENSG00000164733.wgt.RDat	ENSG00000164733.CTSB	8	11700033	11726957	0.0918	rs1293298	-4.12	rs1293322	0.08741	6.44	-3.541	145	1	top1	0.087	3e-09	-3.541	0.000399
NA	./WEIGHTS//train_weights/P55263.ENSG00000156110.wgt.RDat	ENSG00000156110.ADK	10	75910960	76469061	0.054	rs1908337	-3.52	rs1908337	0.053132	4.95	-3.52	160	1	top1	0.053	3.7e-06	-3.52	0.000432
NA	./WEIGHTS//train_weights/Q9Y6X5.ENSG00000001561.wgt.RDat	ENSG00000001561.ENPP4	6	46097730	46114436	0.0674	rs976083	-3.35	rs2295018	0.066672	-6.1	3.219	109	109	blup	0.089	6.2e-09	-3.5048	0.000457
NA	./WEIGHTS//train_weights/Q86W34.ENSG00000196704.wgt.RDat	ENSG00000196704.AMZ2	17	66243715	66253297	0.1384	rs8080714	-4.89	rs3213690	0.152	-7.42	3.46	82	1	top1	0.15	1.7e-14	-3.46	0.00054
NA	./WEIGHTS//train_weights/Q9UMS0.ENSG00000169599.wgt.RDat	ENSG00000169599.NFU1	2	69622882	69664760	0.0488	rs13416004	3.415	rs6724567	0.013045	3.92	-2.607	92	92	bslmm	0.04	5.8e-05	-3.4055	0.00066
NA	./WEIGHTS//train_weights/Q6NUK1.ENSG00000085491.wgt.RDat	ENSG00000085491.SLC25A24	1	108676658	108743471	0.5457	rs2336507	3.22	rs533233	0.434185	-12.79	3.008	118	11	enet	0.49	3.8e-56	-3.2613	0.00111
NA	./WEIGHTS//train_weights/Q15165.ENSG00000105854.wgt.RDat	ENSG00000105854.PON2	7	95034175	95064510	0.172	rs2299263	-3.3	rs7785846	0.262331	-10.25	-3.178	142	7	lasso	0.28	1.8e-28	3.2535	0.00114
NA	./WEIGHTS//train_weights/Q8TCD5.ENSG00000125458.wgt.RDat	ENSG00000125458.NT5C	17	73126320	73127890	0.1047	rs4789127	-3.56	rs729405	0.00412	3.9	3.096	66	66	bslmm	0.028	0.00065	3.23272	0.00123
NA	./WEIGHTS//train_weights/Q9BV23.ENSG00000163686.wgt.RDat	ENSG00000163686.ABHD6	3	58223233	58281420	0.0595	rs4488803	-5.72	rs1554128	0.001194	3.6	3.152	128	128	bslmm	0.037	9.4e-05	3.2172	0.00129
NA	./WEIGHTS//train_weights/Q9Y6Y8.ENSG00000107651.wgt.RDat	ENSG00000107651.SEC23IP	10	121652223	121702014	0.1552	rs11199129	-4.35	rs2901218	0.127355	-7.14	-4.225	103	18	enet	0.15	6.1e-15	3.17794	0.001483
NA	./WEIGHTS//train_weights/Q9NUN5.ENSG00000168216.wgt.RDat	ENSG00000168216.LMBRD1	6	70385694	70507003	0.0623	rs2445958	4.22	rs7742015	0.066087	5.81	-3.243	130	11	enet	0.068	2.6e-07	-3.0891	0.00201
NA	./WEIGHTS//train_weights/Q32NB8.ENSG00000087157.wgt.RDat	ENSG00000087157.PGS1	17	76374721	76421195	0.1001	rs12942703	-3.2	rs2292645	0.0634	5.71	1.833	140	140	blup	0.077	4.4e-08	3.06799	0.00216
NA	./WEIGHTS//train_weights/Q6PHR2.ENSG00000140474.wgt.RDat	ENSG00000140474.ULK3	15	75128457	75135687	0.1771	rs936227	-3.06	rs936227	0.25597	9.94	-3.058	87	1	top1	0.26	4.7e-26	-3.058	0.00223
NA	./WEIGHTS//train_weights/P78524.ENSG00000166444.wgt.RDat	ENSG00000166444.ST5	11	8714898	8932498	0.1175	rs4061049	2.14	rs2742552	0.004097	3.35	1.968	124	14	enet	0.05	0.00012	3.02875	0.00246
NA	./WEIGHTS//train_weights/P35611.ENSG00000087274.wgt.RDat	ENSG00000087274.ADD1	4	2845584	2931803	0.0385	rs7678161	3.75	rs2071695	0.0133	-3.74	-1.792	108	108	blup	0.028	0.00069	3.0149	0.00257
NA	./WEIGHTS//train_weights/P52824.ENSG00000145214.wgt.RDat	ENSG00000145214.DGKQ	4	952675	980683	0.1198	rs6599389	6.69	rs4583705	0.11785	-6.76	6.003	110	110	blup	0.13	9.4e-13	-2.953	0.00315
NA	./WEIGHTS//train_weights/P48454.ENSG00000120910.wgt.RDat	ENSG00000120910.PPP3CC	8	22298332	22398652	0.1351	rs3736147	3.61	rs2461483	0.210307	-9.75	-2.946	160	4	lasso	0.23	2.7e-23	2.952	0.003158
NA	./WEIGHTS//train_weights/Q9P1A6.ENSG00000198010.wgt.RDat	ENSG00000198010.DLGAP2	8	1449532	1656642	0.071	rs2957060	-3.46	rs7842425	0.036214	4.32	-2.931	225	1	top1	0.036	0.00012	-2.931	0.003379
NA	./WEIGHTS//train_weights/Q5U4P2.ENSG00000174939.wgt.RDat	ENSG00000174939.ASPHD1	16	29911696	29931185	0.1686	rs11646118	2.86	rs12917712	0.0823	5.79	-1.941	67	67	bslmm	0.11	4.5e-11	-2.91451	0.00356
NA	./WEIGHTS//train_weights/Q9H0R4.ENSG00000167220.wgt.RDat	ENSG00000167220.HDHD2	18	44633774	44676891	0.1062	rs2668773	2.68	rs2117373	0.0403	4.56	2.342	91	91	bslmm	0.05	7.3e-06	2.899	0.00374
NA	./WEIGHTS//train_weights/Q9Y6H3.ENSG00000166896.wgt.RDat	ENSG00000166896.XRCC6BP1	12	58335324	58351052	0.0551	rs12422977	3.48	rs10877041	0.037792	-4.12	-2.894	72	1	top1	0.038	0.0012	2.894	0.0038
NA	./WEIGHTS//train_weights/P49069.ENSG00000164615.wgt.RDat	ENSG00000164615.CAMLG	5	134074191	134087847	0.2951	rs34765815	-2.85	rs2108665	0.306375	-10.68	-2.827	29	1	top1	0.31	2.6e-31	2.827	0.0047
NA	./WEIGHTS//train_weights/Q99962.ENSG00000107295.wgt.RDat	ENSG00000107295.SH3GL2	9	17579080	17797127	0.063	rs2208485	-5.147	rs10756910	0.014002	4.35	4.172	297	297	blup	0.014	0.012	2.7849	0.00535
NA	./WEIGHTS//train_weights/P29475.ENSG00000089250.wgt.RDat	ENSG00000089250.NOS1	12	117645947	117889975	0.0465	rs12316771	-3.28	rs10774926	0.016696	-4.33	-2.191	186	186	bslmm	0.032	0.00031	2.7765	0.0055
NA	./WEIGHTS//train_weights/Q16348.ENSG00000163406.wgt.RDat	ENSG00000163406.SLC15A2	3	121612936	121662949	0.1503	rs6776670	-3.14	rs11920521	0.183739	-8.72	-2.129	105	37	enet	0.21	1e-20	2.7677	0.00564
NA	./WEIGHTS//train_weights/Q96RD7.ENSG00000110218.wgt.RDat	ENSG00000110218.PANX1	11	93862094	93915138	0.0843	rs1138800	-2.53	rs6483293	0.025986	4.47	-2.378	84	14	enet	0.051	8.2e-06	-2.75773	0.00582
NA	./WEIGHTS//train_weights/P35754.ENSG00000173221.wgt.RDat	ENSG00000173221.GLRX	5	95087023	95158709	0.0931	rs147295	2.48	rs6556886	0.021466	-4.6	-1.599	125	9	enet	0.063	4.8e-07	2.7473	0.00601
NA	./WEIGHTS//train_weights/P02774.ENSG00000145321.wgt.RDat	ENSG00000145321.GC	4	72607410	72669758	0.0312	rs1352844	-2.79	rs222047	0.01569	-3.89	1.291	103	103	blup	0.017	0.0072	-2.7248	0.00643
NA	./WEIGHTS//train_weights/P22830.ENSG00000066926.wgt.RDat	ENSG00000066926.FECH	18	55215515	55254004	0.512	rs317826	3.42	rs2272783	0.232	-9.64	-2.263	160	160	bslmm	0.28	7.7e-29	2.708	0.00677
NA	./WEIGHTS//train_weights/P07148.ENSG00000163586.wgt.RDat	ENSG00000163586.FABP1	2	88422510	88427635	0.206	rs17350803	-2.819	rs17350803	0.093899	6.4	-2.819	120	16	enet	0.13	8.4e-11	-2.6978	0.00698
NA	./WEIGHTS//train_weights/Q9Y512.ENSG00000100347.wgt.RDat	ENSG00000100347.SAMM50	22	44351301	44406411	0.0719	rs5764034	2.67	rs5764034	0.110341	6.73	2.668	163	1	top1	0.11	2.3e-11	2.668	0.00763
NA	./WEIGHTS//train_weights/Q8WW22.ENSG00000140403.wgt.RDat	ENSG00000140403.DNAJA4	15	78556428	78574538	0.159	rs11072745	-2.93	rs2037347	0.06735	6.99	-1.841	125	125	bslmm	0.17	6.1e-17	-2.636	0.00839
NA	./WEIGHTS//train_weights/Q9Y2S2.ENSG00000165475.wgt.RDat	ENSG00000165475.CRYL1	13	20977806	21099996	0.0746	rs9552162	-2.23	rs7329649	-0.000589	-3.6	-0.955	217	217	bslmm	0.015	0.011	2.628	0.0086
NA	./WEIGHTS//train_weights/Q9NRR6.ENSG00000148384.wgt.RDat	ENSG00000148384.INPP5E	9	139323071	139334274	0.0596	rs4400499	3.33	rs3812594	0.034055	-4.48	2.614	107	1	top1	0.034	0.00036	-2.614	0.00895
NA	./WEIGHTS//train_weights/Q8TD55.ENSG00000241839.wgt.RDat	ENSG00000241839.PLEKHO2	15	65134088	65160206	0.0632	rs8036568	-3.2	rs16948440	-0.00222	-3.61	1.628	74	74	blup	0.013	0.016	-2.59524	0.00945
NA	./WEIGHTS//train_weights/Q53HC0.ENSG00000119242.wgt.RDat	ENSG00000119242.CCDC92	12	124403207	124457378	0.0507	rs7956959	3.73	rs12309481	0.058099	-5.61	2.2	83	83	blup	0.075	3.9e-08	-2.5916	0.00955
NA	./WEIGHTS//train_weights/Q9BUB7.ENSG00000175606.wgt.RDat	ENSG00000175606.TMEM70	8	74884672	74895018	0.0338	rs13254338	-2.95	rs1053079	-0.000632	3.89	-0.989	62	62	blup	0.023	0.0027	-2.5839	0.009769
NA	./WEIGHTS//train_weights/Q13825.ENSG00000148090.wgt.RDat	ENSG00000148090.AUH	9	93976097	94124195	0.0917	rs10512210	3.158	rs4743820	0.087199	6.94	1.62	130	8	lasso	0.14	6e-14	2.5662	0.01028
NA	./WEIGHTS//train_weights/P55060.ENSG00000124207.wgt.RDat	ENSG00000124207.CSE1L	20	47662849	47713489	0.0632	rs1556876	-2.57	rs1556876	0.054224	-5.02	-2.566	79	1	top1	0.054	3e-06	2.566	0.0103
NA	./WEIGHTS//train_weights/Q9UPZ6.ENSG00000005108.wgt.RDat	ENSG00000005108.THSD7A	7	11409984	11871824	0.0591	rs10280061	2.89	rs17165078	0.020175	-4.2	-2.562	465	1	top1	0.02	0.0036	2.562	0.0104
NA	./WEIGHTS//train_weights/Q8N4Q0.ENSG00000180011.wgt.RDat	ENSG00000180011.ZADH2	18	72907063	72921303	0.2719	rs4891050	-2.9	rs7230037	0.221	-9.33	2.498	136	3	lasso	0.22	1.5e-22	-2.556	0.0106
NA	./WEIGHTS//train_weights/P00813.ENSG00000196839.wgt.RDat	ENSG00000196839.ADA	20	43248163	43280874	0.2843	rs6031753	-2.99	rs2007720	0.16835	8.15	-1.983	91	21	enet	0.19	4.6e-19	-2.549	0.0108
NA	./WEIGHTS//train_weights/O14734.ENSG00000101473.wgt.RDat	ENSG00000101473.ACOT8	20	44470360	44486045	0.1988	rs4629	2.08	rs7270170	0.096432	6.32	-1.46	103	20	enet	0.13	1.9e-13	-2.543	0.011
NA	./WEIGHTS//train_weights/Q6JBY9.ENSG00000198771.wgt.RDat	ENSG00000198771.RCSD1	1	167599330	167675486	0.149	rs7513428	-2.62	rs926521	0.056413	-5.94	2.536	198	1	top1	0.056	1.9e-06	-2.536	0.0112
NA	./WEIGHTS//train_weights/O95897.ENSG00000105088.wgt.RDat	ENSG00000105088.OLFM2	19	9964394	10047228	0.0425	rs12609594	-2.88	rs12979274	0.02915	4.6	2.523	85	1	top1	0.029	0.00052	2.523	0.0116
NA	./WEIGHTS//train_weights/Q6ICG6.ENSG00000100364.wgt.RDat	ENSG00000100364.KIAA0930	22	45586219	45636650	0.0451	rs9615065	3.05	rs2235152	0.02131	3.64	-2.522	156	1	top1	0.021	0.0031	-2.522	0.0117
NA	./WEIGHTS//train_weights/P53992.ENSG00000176986.wgt.RDat	ENSG00000176986.SEC24C	10	75504120	75531919	0.0566	rs4691	-2.51	rs4691	0.040606	-4.37	-2.514	56	1	top1	0.041	4.9e-05	2.514	0.011937
NA	./WEIGHTS//train_weights/P27169.ENSG00000005421.wgt.RDat	ENSG00000005421.PON1	7	94926988	95025673	0.0646	rs2299263	-3.3	rs757158	0.051329	5.26	-2.334	116	116	blup	0.058	6.8e-06	-2.5113	0.012
NA	./WEIGHTS//train_weights/Q8N8R5.ENSG00000178074.wgt.RDat	ENSG00000178074.C2orf69	2	200775979	200820658	0.3056	rs203772	3.398	rs16832017	0.229321	-9.35	2.487	75	1	top1	0.23	3.6e-23	-2.487	0.0129
NA	./WEIGHTS//train_weights/O14773.ENSG00000166340.wgt.RDat	ENSG00000166340.TPP1	11	6634000	6640692	0.0543	rs2555141	-3.17	rs2072651	0.000188	3.64	2.087	147	16	enet	0.021	0.0027	2.46615	0.01366
NA	./WEIGHTS//train_weights/P07099.ENSG00000143819.wgt.RDat	ENSG00000143819.EPHX1	1	225997794	226033260	0.051	rs10753410	2.83	rs12038486	0.046609	-4.94	2.457	113	1	top1	0.047	1.4e-05	-2.457	0.014
NA	./WEIGHTS//train_weights/P17931.ENSG00000131981.wgt.RDat	ENSG00000131981.LGALS3	14	55590828	55612126	0.0934	rs8019978	-3.232	rs6573009	0.057122	-6.26	-2.496	60	9	enet	0.12	4.2e-12	2.4463	0.0144
NA	./WEIGHTS//train_weights/Q96AA3.ENSG00000163933.wgt.RDat	ENSG00000163933.RFT1	3	53122499	53164478	0.0814	rs6807359	3.52	rs2336725	0.054405	6.13	1.786	88	88	blup	0.081	7.6e-08	2.4391	0.01473
NA	./WEIGHTS//train_weights/O75663.ENSG00000143155.wgt.RDat	ENSG00000143155.TIPRL	1	168148171	168169950	0.0719	rs2072778	-3.29	rs10753766	0.035062	-5.46	-2.542	87	87	bslmm	0.047	1.4e-05	2.4176	0.0156
NA	./WEIGHTS//train_weights/Q17RN3.ENSG00000130244.wgt.RDat	ENSG00000130244.FAM98C	19	38893775	38899728	0.1225	rs3745960	2.13	rs2074981	0.044273	-4.71	1.725	100	100	bslmm	0.1	1.2e-08	-2.4106	0.0159
NA	./WEIGHTS//train_weights/Q9BZ23.ENSG00000125779.wgt.RDat	ENSG00000125779.PANK2	20	3869486	3907605	0.1699	rs910655	-2.97	rs16989000	0.14813	7.6	-1.623	104	104	blup	0.16	1.1e-15	-2.387	0.017
NA	./WEIGHTS//train_weights/P69892.ENSG00000196565.wgt.RDat	ENSG00000196565.HBG2	11	5274420	5667019	0.2009	rs1498553	3.19	rs11036474	0.160962	7.31	-2.384	587	1	top1	0.16	3.8e-14	-2.384	0.01713
NA	./WEIGHTS//train_weights/Q96RS6.ENSG00000120526.wgt.RDat	ENSG00000120526.NUDCD1	8	110253148	110346614	0.3015	rs7008687	2.7	rs7012304	0.071814	6.11	2.068	90	90	bslmm	0.13	1.4e-13	2.3769	0.017458
NA	./WEIGHTS//train_weights/Q86VU5.ENSG00000165644.wgt.RDat	ENSG00000165644.COMTD1	10	76993727	76995788	0.1366	rs7073279	2.37	rs7073279	0.094412	-6	2.373	65	1	top1	0.094	9.9e-10	-2.373	0.017644
NA	./WEIGHTS//train_weights/Q9HBG6.ENSG00000163913.wgt.RDat	ENSG00000163913.IFT122	3	129158968	129239198	0.0339	rs7612530	-2.88	rs7615711	0.024683	-3.84	-2.371	90	1	top1	0.025	0.0019	2.371	0.01774
NA	./WEIGHTS//train_weights/P22102.ENSG00000159131.wgt.RDat	ENSG00000159131.GART	21	34876238	34915797	0.4	rs4817579	2.74	rs2409495	0.264581	-10.62	2.25	74	22	enet	0.31	1.7e-32	-2.346	0.019
NA	./WEIGHTS//train_weights/P16930.ENSG00000103876.wgt.RDat	ENSG00000103876.FAH	15	80444832	80479288	0.4945	rs12595624	2.13	rs11555096	0.12781	-9.06	-2.057	110	18	enet	0.29	2.9e-30	2.34502	0.01903
NA	./WEIGHTS//train_weights/Q96GX9.ENSG00000149089.wgt.RDat	ENSG00000149089.APIP	11	34874641	34938046	0.2744	rs2986429	-2.86	rs2288667	0.32833	10.97	-2.342	150	25	enet	0.43	1.3e-45	-2.3436	0.0191
NA	./WEIGHTS//train_weights/Q9H9S4.ENSG00000102547.wgt.RDat	ENSG00000102547.CAB39L	13	49882786	50018262	0.3669	rs11619804	-2.82	rs8002829	0.288269	-10.47	-1.509	142	15	enet	0.31	2.7e-32	2.341	0.0192
NA	./WEIGHTS//train_weights/Q15166.ENSG00000105852.wgt.RDat	ENSG00000105852.PON3	7	94989256	95025680	0.0947	rs2299263	-3.3	rs757158	0.091802	5.04	-2.334	157	1	top1	0.092	1.3e-06	-2.334	0.0196
NA	./WEIGHTS//train_weights/Q9H7C9.ENSG00000087884.wgt.RDat	ENSG00000087884.AAMDC	11	77532155	77629478	0.2678	rs1630344	-3.42	rs3819211	0.375748	-12.16	-2.351	85	29	enet	0.38	7.2e-41	2.32383	0.02013
NA	./WEIGHTS//train_weights/Q13555.ENSG00000148660.wgt.RDat	ENSG00000148660.CAMK2G	10	75572259	75634343	0.0283	rs2227564	-2.94	rs2664282	0.007184	-3.47	-1.703	78	20	enet	0.014	0.013	2.30699	0.021055
NA	./WEIGHTS//train_weights/P54803.ENSG00000054983.wgt.RDat	ENSG00000054983.GALC	14	88304164	88460009	0.3074	rs119512	3.649	rs416542	0.23074	-9.8	-2.045	150	44	enet	0.31	3.4e-32	2.3051	0.0212
NA	./WEIGHTS//train_weights/Q6PL24.ENSG00000100580.wgt.RDat	ENSG00000100580.TMED8	14	77801364	77843452	0.0836	rs8012228	3.196	rs17105724	0.117054	7.25	-1.59	144	13	enet	0.13	2.8e-13	-2.2973	0.0216
NA	./WEIGHTS//train_weights/Q9NNW7.ENSG00000184470.wgt.RDat	ENSG00000184470.TXNRD2	22	19863040	19929341	0.5122	rs4819845	2.75	rs5748469	0.27711	-10.32	-2.118	193	11	lasso	0.47	2.9e-53	2.28801	0.0221
NA	./WEIGHTS//train_weights/O00408.ENSG00000186642.wgt.RDat	ENSG00000186642.PDE2A	11	72287185	72385635	0.0535	rs10898857	-3.32	rs7123876	0.002667	-4.01	-0.95	149	149	blup	0.031	0.00035	2.28649	0.02223
NA	./WEIGHTS//train_weights/O95858.ENSG00000099282.wgt.RDat	ENSG00000099282.TSPAN15	10	71211229	71267425	0.0498	rs17490500	-3.18	rs12776158	-0.002674	3.41	-1.378	165	165	blup	0.016	0.0075	-2.28107	0.022544
NA	./WEIGHTS//train_weights/Q96D71.ENSG00000135597.wgt.RDat	ENSG00000135597.REPS1	6	139224630	139309398	0.0469	rs1188866	2.39	rs6902027	0.050398	-4.93	-2.263	134	1	top1	0.05	6.6e-06	2.263	0.0236
NA	./WEIGHTS//train_weights/Q8N490.ENSG00000127838.wgt.RDat	ENSG00000127838.PNKD	2	219135115	219211516	0.0299	rs3817266	-2.524	rs4324314	0.033866	4.6	-1.889	118	8	enet	0.041	5.1e-05	-2.258	0.0239
NA	./WEIGHTS//train_weights/P20936.ENSG00000145715.wgt.RDat	ENSG00000145715.RASA1	5	86563705	86687748	0.2211	rs13186304	-2.6	rs13157168	0.101514	-6.47	2.12	69	69	bslmm	0.1	1.5e-10	-2.2461	0.0247
NA	./WEIGHTS//train_weights/Q2M2I8.ENSG00000115977.wgt.RDat	ENSG00000115977.AAK1	2	69688532	69901481	0.0416	rs13416004	3.415	rs2312207	0.020922	3.98	2.735	115	8	enet	0.038	7.8e-05	2.2409	0.025
NA	./WEIGHTS//train_weights/Q12981.ENSG00000113734.wgt.RDat	ENSG00000113734.BNIP1	5	172571445	172591390	0.2103	rs1123336	-2.7	rs35387209	0.232094	-9.43	-2.231	93	1	top1	0.23	5.3e-23	2.231	0.02568
NA	./WEIGHTS//train_weights/Q5T5P2.ENSG00000120549.wgt.RDat	ENSG00000120549.KIAA1217	10	23983675	24836772	0.0863	rs11013951	2.42	rs11597573	0.012975	-3.7	1.224	308	308	bslmm	0.017	0.0061	-2.22789	0.025888
NA	./WEIGHTS//train_weights/Q9Y3A6.ENSG00000117500.wgt.RDat	ENSG00000117500.TMED5	1	93615299	93646285	0.0236	rs2749732	3.27	rs1060622	0.01587	3.76	1.757	74	16	enet	0.021	0.0034	2.2235	0.0262
NA	./WEIGHTS//train_weights/Q9UM22.ENSG00000086289.wgt.RDat	ENSG00000086289.EPDR1	7	37723446	37991543	0.0798	rs10261983	-3.49	rs12671182	0.000497	3.85	-1.523	189	189	bslmm	0.023	0.002	-2.2183	0.0265
NA	./WEIGHTS//train_weights/P23381.ENSG00000140105.wgt.RDat	ENSG00000140105.WARS	14	100800125	100843142	0.0611	rs1951519	-2.742	rs3742384	0.06104	-5.13	-2.214	91	1	top1	0.061	7.3e-07	2.214	0.0268
NA	./WEIGHTS//train_weights/Q6P1Q0.ENSG00000050426.wgt.RDat	ENSG00000050426.LETMD1	12	51441745	51454207	0.0356	rs10876138	2.63	rs7979705	0.030715	-4.33	1.909	95	2	lasso	0.039	6.2e-05	-2.2033	0.0276
NA	./WEIGHTS//train_weights/Q15043.ENSG00000104635.wgt.RDat	ENSG00000104635.SLC39A14	8	22224762	22291642	0.0523	rs1051638	-3.36	rs6984908	-0.000233	3.43	-2.34	106	106	blup	0.0063	0.067	-2.1994	0.027848
NA	./WEIGHTS//train_weights/Q92828.ENSG00000106789.wgt.RDat	ENSG00000106789.CORO2A	9	100883257	100954922	0.1588	rs16913640	2.504	rs17810151	0.039427	-4.04	-0.288	151	151	blup	0.058	1.5e-06	-2.1976	0.02798
NA	./WEIGHTS//train_weights/Q8NC44.ENSG00000144567.wgt.RDat	ENSG00000144567.FAM134A	2	220040947	220050201	0.0439	rs17655123	-2.196	rs17655123	0.030799	-4.7	-2.196	87	1	top1	0.031	0.00037	2.196	0.0281
NA	./WEIGHTS//train_weights/Q16762.ENSG00000128311.wgt.RDat	ENSG00000128311.TST	22	37406900	37415681	0.0904	rs16997498	2.61	rs6000522	0.005452	3.95	-0.92	148	148	blup	0.04	5.7e-05	-2.18597	0.0288
NA	./WEIGHTS//train_weights/Q8IZS8.ENSG00000157445.wgt.RDat	ENSG00000157445.CACNA2D3	3	54156574	55108584	0.1005	rs1184882	2.86	rs750379	0.021915	4.22	2.184	690	1	top1	0.022	0.0023	2.184	0.02896
NA	./WEIGHTS//train_weights/Q709C8.ENSG00000129003.wgt.RDat	ENSG00000129003.VPS13C	15	62144588	62352672	0.1803	rs4359383	-3.29	rs12442569	0.05218	-6.74	-2.355	205	4	lasso	0.14	3.4e-14	2.17454	0.02966
NA	./WEIGHTS//train_weights/Q13042.ENSG00000130177.wgt.RDat	ENSG00000130177.CDC16	13	115000362	115038198	0.0243	rs11840483	-2.33	rs2039092	0.026314	-4.19	-2.167	84	1	top1	0.026	0.00093	2.167	0.0302
NA	./WEIGHTS//train_weights/O94766.ENSG00000149541.wgt.RDat	ENSG00000149541.B3GAT3	11	62382768	62389647	0.0506	rs4489748	-2.56	rs644616	0.040351	-4.78	-2.162	51	1	top1	0.04	5.2e-05	2.162	0.03062
NA	./WEIGHTS//train_weights/Q9NQE9.ENSG00000111911.wgt.RDat	ENSG00000111911.HINT3	6	126277927	126301387	0.0232	rs9388462	3.08	rs2024583	0.016279	-3.64	-2.919	61	61	blup	0.024	0.0015	2.1534	0.0313
NA	./WEIGHTS//train_weights/Q5T0D9.ENSG00000158109.wgt.RDat	ENSG00000158109.TPRG1L	1	3541566	3546691	0.0585	rs6697749	-2.73	rs2821007	0.033144	-4.58	-2.141	77	1	top1	0.033	0.00023	2.141	0.0323
NA	./WEIGHTS//train_weights/O95793.ENSG00000124214.wgt.RDat	ENSG00000124214.STAU1	20	47729878	47804904	0.0409	rs3021	-3.02	rs6066968	0.032884	3.81	2.213	92	92	bslmm	0.034	0.0002	2.138	0.0325
NA	./WEIGHTS//train_weights/Q9HC21.ENSG00000125454.wgt.RDat	ENSG00000125454.SLC25A19	17	73269073	73285591	0.0681	rs729405	3.1	rs4789161	0.0394	3.93	1.686	50	50	bslmm	0.05	1.1e-05	2.13692	0.0326
NA	./WEIGHTS//train_weights/O75323.ENSG00000146729.wgt.RDat	ENSG00000146729.GBAS	7	56019486	56067874	0.1409	rs10245725	-2.58	rs7793921	0.124113	7.01	-2.363	85	4	lasso	0.13	3.8e-13	-2.1338	0.0329
NA	./WEIGHTS//train_weights/Q13972.ENSG00000058335.wgt.RDat	ENSG00000058335.RASGRF1	15	79252289	79383115	0.0436	rs1443658	2.55	rs12595749	0.03777	-4.2	2.131	164	1	top1	0.038	8.8e-05	-2.131	0.03309
NA	./WEIGHTS//train_weights/Q7L576.ENSG00000068793.wgt.RDat	ENSG00000068793.CYFIP1	15	22892005	23006016	0.0833	rs7168676	-2.24	rs7174982	0.01449	-4.14	2.125	149	1	top1	0.014	0.011	-2.125	0.03359
NA	./WEIGHTS//train_weights/Q6PML9.ENSG00000014824.wgt.RDat	ENSG00000014824.SLC30A9	4	41992489	42092474	0.0812	rs6813397	-2.99	rs7682049	0.02144	4.88	-1.929	116	116	bslmm	0.031	0.00036	-2.1232	0.0337
NA	./WEIGHTS//train_weights/O95834.ENSG00000125746.wgt.RDat	ENSG00000125746.EML2	19	46110252	46148887	0.0732	rs12978792	2.87	rs7252175	0.09066	-6.08	1.747	86	4	lasso	0.094	6.9e-10	-2.1023	0.0355
NA	./WEIGHTS//train_weights/P84157.ENSG00000182534.wgt.RDat	ENSG00000182534.MXRA7	17	74668633	74707098	0.0728	rs2429452	-3.1	rs7211963	0.0339	4.16	-2.089	98	1	top1	0.034	0.0002	-2.089	0.0367
NA	./WEIGHTS//train_weights/Q14696.ENSG00000117899.wgt.RDat	ENSG00000117899.MESDC2	15	81239667	81282219	0.0939	rs17328295	-2.19	rs8026419	0.05293	4.99	-0.33	95	95	bslmm	0.06	9.4e-07	-2.08456	0.03711
NA	./WEIGHTS//train_weights/Q6UVY6.ENSG00000079931.wgt.RDat	ENSG00000079931.MOXD1	6	132617194	132722684	0.0566	rs12528986	2.25	rs11154669	0.002674	3.52	1.608	133	133	blup	0.027	0.00088	2.0797	0.0376
NA	./WEIGHTS//train_weights/Q86SX6.ENSG00000182512.wgt.RDat	ENSG00000182512.GLRX5	14	95999840	96011061	0.5065	rs10135082	-2.306	rs10484053	0.322118	-11.09	-2.055	216	216	bslmm	0.34	4.7e-36	2.0785	0.0377
NA	./WEIGHTS//train_weights/Q9P265.ENSG00000066084.wgt.RDat	ENSG00000066084.DIP2B	12	50898768	51142450	0.063	rs7306677	-2.77	rs10747586	0.049999	-4.83	2.076	114	1	top1	0.05	7.1e-06	-2.076	0.0379
NA	./WEIGHTS//train_weights/P68402.ENSG00000168092.wgt.RDat	ENSG00000168092.PAFAH1B2	11	117014983	117047610	0.0489	rs11216267	2.36	rs4938354	0.012041	-3.62	1.574	85	85	bslmm	0.027	0.00087	-2.07295	0.03818
NA	./WEIGHTS//train_weights/Q8NEU8.ENSG00000136044.wgt.RDat	ENSG00000136044.APPL2	12	105567074	105630016	0.102	rs1196814	3.28	rs12301914	0.006675	3.54	-1.491	136	14	enet	0.047	1.3e-05	-2.073	0.0382
NA	./WEIGHTS//train_weights/Q96FV2.ENSG00000141295.wgt.RDat	ENSG00000141295.SCRN2	17	45915058	45918699	0.3164	rs11079797	2.18	rs2325752	0.086	5.9	-1.019	95	95	bslmm	0.15	6.1e-15	-2.07215	0.0383
NA	./WEIGHTS//train_weights/Q9NSD9.ENSG00000116120.wgt.RDat	ENSG00000116120.FARSB	2	223435255	223521056	0.0944	rs11692810	3.348	rs4674677	0.073701	-6.24	2.689	140	7	lasso	0.1	9.9e-11	-2.0587	0.0395
NA	./WEIGHTS//train_weights/Q15051.ENSG00000173226.wgt.RDat	ENSG00000173226.IQCB1	3	121488610	121553926	0.1087	rs28660600	-3.15	rs6767409	0.030743	5.17	-3.038	105	11	enet	0.087	1.6e-06	-2.0565	0.03974
NA	./WEIGHTS//train_weights/P53990.ENSG00000182149.wgt.RDat	ENSG00000182149.IST1	16	71879899	71962913	0.1674	rs16973520	-3.79	rs7195988	0.00485	-4.14	0.45	115	23	enet	0.068	1.9e-07	-2.0502	0.0403
NA	./WEIGHTS//train_weights/Q96GZ6.ENSG00000114544.wgt.RDat	ENSG00000114544.SLC41A3	3	125725198	125820404	0.0646	rs905455	-2.57	rs3772431	0.028111	4.07	-1.555	129	129	bslmm	0.029	0.00073	-2.0447	0.04089
NA	./WEIGHTS//train_weights/Q6ZVM7.ENSG00000175662.wgt.RDat	ENSG00000175662.TOM1L2	17	17746828	17875736	0.0616	rs3818717	-2.65	rs7501812	0.11	-6.9	-1.99	117	12	enet	0.11	1.4e-11	2.04452	0.0409
NA	./WEIGHTS//train_weights/A2RUC4.ENSG00000162971.wgt.RDat	ENSG00000162971.TYW5	2	200794698	200820459	0.0452	rs203772	3.398	rs166849	0.035814	-4.24	2.04	75	1	top1	0.036	0.00025	-2.04	0.0414
NA	./WEIGHTS//train_weights/Q9HC56.ENSG00000184226.wgt.RDat	ENSG00000184226.PCDH9	13	66876967	67804468	0.0669	rs9529132	3.42	rs9529154	-0.002526	-3.34	1.934	468	468	blup	0.026	0.00098	-2.034	0.0419
NA	./WEIGHTS//train_weights/P09488.ENSG00000134184.wgt.RDat	ENSG00000134184.GSTM1	1	110230436	110251661	0.4259	rs17598321	4.17	rs3754446	0.089888	-6.01	-0.365	95	32	enet	0.18	1.7e-18	2.0284	0.0425
NA	./WEIGHTS//train_weights/O95479.ENSG00000049239.wgt.RDat	ENSG00000049239.H6PD	1	9294834	9331396	0.0977	rs10489436	2.24	rs9435151	0.012872	-3.87	1.709	122	11	enet	0.081	1.4e-07	-2.0279	0.0426
NA	./WEIGHTS//train_weights/Q92820.ENSG00000137563.wgt.RDat	ENSG00000137563.GGH	8	63927638	63951730	0.0466	rs1350059	-2.9	rs10504361	0.004905	4.17	0.76	113	113	blup	0.047	1.4e-05	2.0265	0.042716
NA	./WEIGHTS//train_weights/Q15293.ENSG00000049449.wgt.RDat	ENSG00000049449.RCN1	11	31833939	32127301	0.0676	rs224632	3.44	rs224633	0.088631	-5.87	-2.024	117	1	top1	0.089	2.3e-09	2.024	0.04297
NA	./WEIGHTS//train_weights/P22732.ENSG00000142583.wgt.RDat	ENSG00000142583.SLC2A5	1	9095166	9148537	0.15	rs3737669	-3.3	rs3820034	0.021517	4.77	2.243	126	25	enet	0.093	1e-09	2.0237	0.043
NA	./WEIGHTS//train_weights/Q02338.ENSG00000161267.wgt.RDat	ENSG00000161267.BDH1	3	197236654	197300194	0.5071	rs6781945	2.28	rs8034	0.181772	8.53	1.693	100	30	enet	0.22	1.1e-21	2.0185	0.04354
NA	./WEIGHTS//train_weights/Q8WVE0.ENSG00000150456.wgt.RDat	ENSG00000150456.N6AMT2	13	21302870	21348097	0.0758	rs4146442	-3.42	rs17318109	0.060276	-4.7	-2.016	88	1	top1	0.06	4.5e-06	2.016	0.0438
NA	./WEIGHTS//train_weights/Q96IZ0.ENSG00000177425.wgt.RDat	ENSG00000177425.PAWR	12	79968759	80084877	0.1075	rs8176861	-2.7	rs955574	0.041737	4.34	2.009	77	1	top1	0.042	0.00048	2.009	0.0445
NA	./WEIGHTS//train_weights/Q9HBK9.ENSG00000214435.wgt.RDat	ENSG00000214435.AS3MT	10	104629273	104661656	0.0944	rs17115073	2.85	rs11191439	0.010456	-3.85	-0.808	89	89	bslmm	0.021	0.004	1.99838	0.045676
NA	./WEIGHTS//train_weights/Q16666.ENSG00000163565.wgt.RDat	ENSG00000163565.IFI16	1	158969758	159024945	0.0694	rs12239437	2.47	rs1578477	0.005335	3.46	2.318	101	101	bslmm	0.015	0.011	1.9937	0.0462
NA	./WEIGHTS//train_weights/Q9UEW8.ENSG00000198648.wgt.RDat	ENSG00000198648.STK39	2	168810530	169104651	0.0697	rs9917256	6.055	rs1517334	0.021593	-4.84	1.587	243	243	blup	0.029	0.00052	-1.9777	0.048
NA	./WEIGHTS//train_weights/P23229.ENSG00000091409.wgt.RDat	ENSG00000091409.ITGA6	2	173292082	173371181	0.0866	rs12151618	2.975	rs10166912	0.002563	3.9	-0.483	157	25	enet	0.055	2.6e-06	-1.9739	0.0484
NA	./WEIGHTS//train_weights/Q9BTW9.ENSG00000141556.wgt.RDat	ENSG00000141556.TBCD	17	80709940	80900724	0.2732	rs8078148	-2.64	rs11869930	0.0875	7.79	-2.167	187	187	blup	0.28	1.1e-28	-1.96604	0.0493
NA	./WEIGHTS//train_weights/Q92530.ENSG00000125818.wgt.RDat	ENSG00000125818.PSMF1	20	1093906	1160596	0.1098	rs16991645	2.74	rs6039805	0.033286	-4.34	-1.96	131	1	top1	0.033	0.00022	1.96	0.05
NA	./WEIGHTS//train_weights/Q9UQ16.ENSG00000197959.wgt.RDat	ENSG00000197959.DNM3	1	171810621	172387606	0.1005	rs3753539	-4.17	rs7528296	0.041733	-5.38	0.22	389	389	blup	0.057	1.7e-06	1.9588	0.0501
NA	./WEIGHTS//train_weights/O95619.ENSG00000127337.wgt.RDat	ENSG00000127337.YEATS4	12	69753483	69784576	0.0777	rs7132549	2.26	rs3825243	0.008354	4.56	1.938	115	19	enet	0.054	3.3e-05	1.9563	0.0504
NA	./WEIGHTS//train_weights/Q86YR5.ENSG00000160360.wgt.RDat	ENSG00000160360.GPSM1	9	139221932	139254057	0.2375	rs4400499	3.33	rs28642252	0.106244	-6.65	1.612	77	10	enet	0.11	1.1e-11	-1.9527	0.05086
NA	./WEIGHTS//train_weights/Q8IWW8.ENSG00000147576.wgt.RDat	ENSG00000147576.ADHFE1	8	67342420	67383836	0.4407	rs16932810	2.95	rs1030420	0.303828	11.09	2.336	73	7	lasso	0.43	1.6e-47	1.9515	0.050994
NA	./WEIGHTS//train_weights/Q9H330.ENSG00000106771.wgt.RDat	ENSG00000106771.TMEM245	9	111777432	111882225	0.1266	rs1533642	3.594	rs489283	0.098403	6.75	1.231	154	6	lasso	0.13	1.9e-13	1.949	0.05129
NA	./WEIGHTS//train_weights/Q9Y534.ENSG00000172346.wgt.RDat	ENSG00000172346.CSDC2	22	41956767	41973745	0.1522	rs727563	-3.04	rs132770	0.129932	7.16	-2.022	42	42	bslmm	0.14	4.1e-13	-1.94847	0.0514
NA	./WEIGHTS//train_weights/P49441.ENSG00000151689.wgt.RDat	ENSG00000151689.INPP1	2	191208196	191236391	0.3635	rs3811607	-2.745	rs7592352	0.080442	-6.75	-1.541	93	9	enet	0.12	2.5e-12	1.945	0.0518
NA	./WEIGHTS//train_weights/Q6NXE6.ENSG00000105676.wgt.RDat	ENSG00000105676.ARMC6	19	19144384	19170563	0.4132	rs964132	-2.37	rs7253352	0.021132	-3.42	-0.518	70	70	bslmm	0.12	7.8e-12	1.9421	0.0521
NA	./WEIGHTS//train_weights/P48449.ENSG00000160285.wgt.RDat	ENSG00000160285.LSS	21	47608055	47648738	0.2135	rs2839189	-2.79	rs2839157	0.252233	-9.98	-2.408	126	18	enet	0.27	1.5e-27	1.932	0.0534
NA	./WEIGHTS//train_weights/Q7RTP6.ENSG00000243156.wgt.RDat	ENSG00000243156.MICAL3	22	18270415	18507325	0.0743	rs2587113	-2.49	rs401910	0.001284	-3.61	1.827	270	270	blup	0.033	0.00026	-1.92807	0.0538
NA	./WEIGHTS//train_weights/Q17R31.ENSG00000203705.wgt.RDat	ENSG00000203705.TATDN3	1	212965170	212989968	0.1711	rs3738800	-2.49	rs12753524	0.068159	5.96	-1.863	94	6	lasso	0.11	2.7e-11	-1.9264	0.0541
NA	./WEIGHTS//train_weights/Q6P9F7.ENSG00000197147.wgt.RDat	ENSG00000197147.LRRC8B	1	89990395	90063423	0.0286	rs12098051	-2.35	rs9427984	0.008666	-3.53	-1.297	108	108	blup	0.02	0.0035	1.9253	0.0542
NA	./WEIGHTS//train_weights/P68366.ENSG00000127824.wgt.RDat	ENSG00000127824.TUBA4A	2	220114433	220142892	0.0247	rs6436132	-2.308	rs4485556	0.000182	-3.01	-0.768	87	87	blup	0.016	0.0089	1.9196	0.0549
NA	./WEIGHTS//train_weights/Q13641.ENSG00000146242.wgt.RDat	ENSG00000146242.TPBG	6	83072923	83080545	0.0993	rs497198	2.39	rs9449462	0.031571	-4.72	1.311	56	56	blup	0.052	4.9e-06	-1.9143	0.0556
NA	./WEIGHTS//train_weights/Q9NSU2.ENSG00000213689.wgt.RDat	ENSG00000213689.TREX1	3	48506445	48509044	0.0435	rs6776700	-2.44	rs11797	0.052405	-4.86	-1.851	62	62	blup	0.056	1e-05	1.9098	0.05616
NA	./WEIGHTS//train_weights/O95674.ENSG00000101290.wgt.RDat	ENSG00000101290.CDS2	20	5107432	5178533	0.0426	rs6038044	2.6	rs2326599	0.044501	4.92	1.758	115	2	lasso	0.048	1e-05	1.909	0.0563
NA	./WEIGHTS//train_weights/Q7L3T8.ENSG00000162396.wgt.RDat	ENSG00000162396.PARS2	1	55222571	55230187	0.0932	rs1529783	1.79	rs17515141	0.045627	-4.6	-1.276	133	133	bslmm	0.053	4.1e-06	1.9012	0.0573
NA	./WEIGHTS//train_weights/Q99884.ENSG00000011083.wgt.RDat	ENSG00000011083.SLC6A7	5	149569520	149602351	0.0758	rs1010101	-2.3	rs4601032	0.041027	4.43	-1.898	144	1	top1	0.041	6e-05	-1.898	0.0577
NA	./WEIGHTS//train_weights/Q9H1V8.ENSG00000197106.wgt.RDat	ENSG00000197106.SLC6A17	1	110693108	110744824	0.1327	rs3904622	-2.12	rs7554444	0.177153	-8.44	-1.896	133	1	top1	0.18	8.5e-18	1.896	0.058
NA	./WEIGHTS//train_weights/Q9NRR5.ENSG00000160803.wgt.RDat	ENSG00000160803.UBQLN4	1	156005092	156023585	0.0534	rs34372695	7	rs1111102	0.024964	-4.01	-1.891	73	1	top1	0.025	0.0012	1.891	0.0586
NA	./WEIGHTS//train_weights/P50053.ENSG00000138030.wgt.RDat	ENSG00000138030.KHK	2	27309615	27323640	0.2839	rs920433	2.441	rs2304681	0.443065	-12.32	1.89	61	1	top1	0.44	7.8e-45	-1.89	0.0588
NA	./WEIGHTS//train_weights/Q12805.ENSG00000115380.wgt.RDat	ENSG00000115380.EFEMP1	2	56093102	56151274	0.0958	rs6545522	3.561	rs13431149	0.015002	4.57	0.57	134	134	bslmm	0.056	2.7e-06	1.8881	0.059
NA	./WEIGHTS//train_weights/Q9NUT2.ENSG00000197150.wgt.RDat	ENSG00000197150.ABCB8	7	150725510	150744869	0.2358	rs4725991	-2.37	rs11770520	0.08987	-6.14	-1.405	101	19	enet	0.17	2.6e-17	1.8885	0.059
NA	./WEIGHTS//train_weights/Q14697.ENSG00000089597.wgt.RDat	ENSG00000089597.GANAB	11	62392298	62414104	0.2081	rs4489748	-2.56	rs1058678	0.054364	-4.98	0.177	56	56	blup	0.061	6.8e-07	-1.88308	0.05969
NA	./WEIGHTS//train_weights/P36955.ENSG00000132386.wgt.RDat	ENSG00000132386.SERPINF1	17	1665253	1680868	0.0741	rs9747855	3.24	rs1136287	0.0296	-3.54	1.185	104	104	bslmm	0.047	1.4e-05	-1.88282	0.0597
NA	./WEIGHTS//train_weights/Q9HB21.ENSG00000107679.wgt.RDat	ENSG00000107679.PLEKHA1	10	124134212	124191867	0.0503	rs2421015	2.38	rs10510110	0.030134	-4.36	-1.882	181	1	top1	0.03	0.00042	1.882	0.059836
NA	./WEIGHTS//train_weights/P45844.ENSG00000160179.wgt.RDat	ENSG00000160179.ABCG1	21	43619799	43717354	0.1346	rs468614	-3.11	rs220148	-0.000195	3.35	-1.568	223	223	bslmm	0.044	0.00076	-1.878	0.0604
NA	./WEIGHTS//train_weights/Q96PE7.ENSG00000124370.wgt.RDat	ENSG00000124370.MCEE	2	71336814	71357369	0.4233	rs2080643	-2.281	rs6725113	0.272753	-10.63	1.73	112	112	blup	0.34	2.7e-35	-1.8768	0.0605
NA	./WEIGHTS//train_weights/Q9H0W9.ENSG00000182919.wgt.RDat	ENSG00000182919.C11orf54	11	93474757	93497915	0.2551	rs12289146	-2.82	rs652961	0.411264	12.47	1.874	62	1	top1	0.41	3.7e-45	1.874	0.06093
NA	./WEIGHTS//train_weights/P50416.ENSG00000110090.wgt.RDat	ENSG00000110090.CPT1A	11	68522088	68611878	0.0486	rs2187331	-3.51	rs4460815	0.042212	4.51	-2.008	120	120	blup	0.054	3.3e-06	-1.87259	0.06113
NA	./WEIGHTS//train_weights/A6NK58.ENSG00000175536.wgt.RDat	ENSG00000175536.LIPT2	11	74202757	74204778	0.0602	rs684877	2.21	rs1280088	0.034708	-4.67	-1.864	108	1	top1	0.035	0.0018	1.864	0.06232
NA	./WEIGHTS//train_weights/O60260.ENSG00000185345.wgt.RDat	ENSG00000185345.PARK2	6	161768452	163148803	0.1086	rs9295181	3.02	rs9346868	-0.002036	-3.72	-0.632	946	946	blup	0.028	0.00062	-1.862	0.0626
NA	./WEIGHTS//train_weights/Q6ZVF9.ENSG00000185477.wgt.RDat	ENSG00000185477.GPRIN3	4	90157537	90229161	0.1482	rs1560488	2.32	rs2005104	0.09075	6.02	1.511	113	5	lasso	0.095	5.7e-10	1.8575	0.0632
NA	./WEIGHTS//train_weights/Q5RI15.ENSG00000203667.wgt.RDat	ENSG00000203667.COX20	1	244998624	245008359	0.041	rs4351623	2.72	rs12146095	-0.002115	-3.23	1.348	57	57	blup	0.0034	0.13	-1.8416	0.0655
NA	./WEIGHTS//train_weights/P21964.ENSG00000093010.wgt.RDat	ENSG00000093010.COMT	22	19929130	19957498	0.3757	rs1978058	2.73	rs4680	0.376942	11.85	1.836	178	1	top1	0.38	5.4e-39	1.836	0.0664
NA	./WEIGHTS//train_weights/P51659.ENSG00000133835.wgt.RDat	ENSG00000133835.HSD17B4	5	118788138	118972894	0.1486	rs257970	-2.75	rs32665	0.158456	-8.44	1.719	99	5	lasso	0.17	2.5e-17	-1.8347	0.06655
NA	./WEIGHTS//train_weights/P08237.ENSG00000152556.wgt.RDat	ENSG00000152556.PFKM	12	48498922	48540187	0.1421	rs1476607	2.69	rs2269935	0.10621	-7.48	-2.242	118	118	blup	0.15	7.1e-15	1.8342	0.0666
NA	./WEIGHTS//train_weights/P24298.ENSG00000167701.wgt.RDat	ENSG00000167701.GPT	8	145728356	145732557	0.0262	rs10111332	-2.3	rs13254911	0.041231	-4.34	-1.834	52	1	top1	0.041	4.3e-05	1.834	0.066654
NA	./WEIGHTS//train_weights/O75844.ENSG00000084073.wgt.RDat	ENSG00000084073.ZMPSTE24	1	40723779	40759856	0.0857	rs6691598	1.98	rs6682701	0.093577	-6.01	1.834	89	1	top1	0.094	8.3e-10	-1.834	0.0667
NA	./WEIGHTS//train_weights/Q13608.ENSG00000124587.wgt.RDat	ENSG00000124587.PEX6	6	42931608	42946958	0.0589	rs1129187	2.92	rs9462856	0.044967	-4.69	-1.767	86	11	enet	0.053	2.5e-05	1.8297	0.0673
NA	./WEIGHTS//train_weights/P09455.ENSG00000114115.wgt.RDat	ENSG00000114115.RBP1	3	139236276	139258671	0.0753	rs9822458	-1.84	rs2071387	0.036272	4.16	-1.82	110	1	top1	0.036	0.00012	-1.82	0.06876
NA	./WEIGHTS//train_weights/Q9NZJ6.ENSG00000132423.wgt.RDat	ENSG00000132423.COQ3	6	99817276	99842080	0.1876	rs3811072	2.34	rs1009031	0.196568	-8.7	1.537	108	9	lasso	0.22	9.7e-22	-1.8174	0.0691
NA	./WEIGHTS//train_weights/P47895.ENSG00000184254.wgt.RDat	ENSG00000184254.ALDH1A3	15	101417919	101456831	0.291	rs4965745	3.09	rs11630508	0.13978	-7.41	-1.814	122	1	top1	0.14	7.1e-14	1.814	0.06968
NA	./WEIGHTS//train_weights/Q96K76.ENSG00000170242.wgt.RDat	ENSG00000170242.USP47	11	11862970	11980870	0.0478	rs10831672	2.6	rs10831676	0.054142	-4.76	1.813	196	1	top1	0.054	3e-06	-1.813	0.06983
NA	./WEIGHTS//train_weights/Q53FA7.ENSG00000115129.wgt.RDat	ENSG00000115129.TP53I3	2	24300303	24308731	0.1599	rs17712391	-2.842	rs1134516	0.159066	-7.66	1.805	77	1	top1	0.16	1.6e-15	-1.805	0.0711
NA	./WEIGHTS//train_weights/Q6PD74.ENSG00000103591.wgt.RDat	ENSG00000103591.AAGAB	15	67493371	67547533	0.0345	rs8991	-2.82	rs8025774	0.01551	-4.31	1.549	120	120	blup	0.028	0.0012	-1.80458	0.07114
NA	./WEIGHTS//train_weights/P42025.ENSG00000115073.wgt.RDat	ENSG00000115073.ACTR1B	2	98272431	98280570	0.3025	rs17695937	1.74	rs11692435	0.132925	-7.13	-1.686	42	42	bslmm	0.15	3.1e-15	1.8018	0.0716
NA	./WEIGHTS//train_weights/P33241.ENSG00000130592.wgt.RDat	ENSG00000130592.LSP1	11	1874200	1913497	0.1956	rs689363	-2.53	rs11041476	0.106358	5.9	1.8	90	1	top1	0.11	3.7e-09	1.8	0.07186
NA	./WEIGHTS//train_weights/Q9UNQ0.ENSG00000118777.wgt.RDat	ENSG00000118777.ABCG2	4	89011416	89152474	0.0998	rs7696304	2.73	rs1481012	0.12182	-6.6	-1.792	127	1	top1	0.12	3.9e-11	1.792	0.0731
NA	./WEIGHTS//train_weights/P51148.ENSG00000108774.wgt.RDat	ENSG00000108774.RAB5C	17	40276994	40307035	0.0336	rs6503688	2.65	rs8081327	0.0288	4.16	-1.848	50	50	blup	0.032	0.00029	-1.78923	0.0736
NA	./WEIGHTS//train_weights/P49593.ENSG00000100034.wgt.RDat	ENSG00000100034.PPM1F	22	22273793	22307209	0.0362	rs4821367	4.19	rs240054	0.011765	-3.97	1.995	115	115	blup	0.014	0.012	-1.7847	0.0743
NA	./WEIGHTS//train_weights/P04080.ENSG00000160213.wgt.RDat	ENSG00000160213.CSTB	21	45192393	45196326	0.0286	rs13052408	2.21	rs2276246	0.006102	-3.53	2.087	99	99	blup	0.021	0.003	-1.784	0.0744
NA	./WEIGHTS//train_weights/A0JNW5.ENSG00000111647.wgt.RDat	ENSG00000111647.UHRF1BP1L	12	100422233	100536626	0.0726	rs10860558	-2.4	rs7962975	-0.002602	3.19	0.703	107	107	bslmm	0.02	0.0035	1.7789	0.0753
NA	./WEIGHTS//train_weights/A1IGU5.ENSG00000183111.wgt.RDat	ENSG00000183111.ARHGEF37	5	148931510	149014531	0.0794	rs7731599	-1.93	rs9791154	0.082609	5.35	1.763	124	1	top1	0.083	1.1e-07	1.763	0.0779
NA	./WEIGHTS//train_weights/Q9H400.ENSG00000203896.wgt.RDat	ENSG00000203896.LIME1	20	62366815	62370456	0.1051	rs6062484	2.66	rs6062504	0.049951	-4.29	1.339	89	89	bslmm	0.059	1.9e-05	-1.761	0.0782
NA	./WEIGHTS//train_weights/Q9NP58.ENSG00000115657.wgt.RDat	ENSG00000115657.ABCB6	2	220074490	220083712	0.0295	rs6436132	-2.308	rs3731900	0.006217	3.7	-1.749	88	88	bslmm	0.026	0.0011	-1.7571	0.0789
NA	./WEIGHTS//train_weights/P08582.ENSG00000163975.wgt.RDat	ENSG00000163975.MFI2	3	196715492	196756687	0.102	rs6782621	-2.3	rs17597256	0.047031	-6.05	-1.445	103	103	blup	0.096	7.7e-10	1.7566	0.07898
NA	./WEIGHTS//train_weights/P11215.ENSG00000169896.wgt.RDat	ENSG00000169896.ITGAM	16	31271311	31344213	0.0213	rs11645653	2.81	rs4075052	0.0196	-3.65	-1.755	76	1	top1	0.02	0.0038	1.755	0.0793
NA	./WEIGHTS//train_weights/P26373.ENSG00000167526.wgt.RDat	ENSG00000167526.RPL13	16	89627065	89630950	0.0272	rs4347628	-2.85	rs3803677	0.0124	-3.87	1.752	84	1	top1	0.012	0.017	-1.752	0.0798
NA	./WEIGHTS//train_weights/O43852.ENSG00000128595.wgt.RDat	ENSG00000128595.CALU	7	128379346	128411861	0.0829	rs10488628	2.86	rs1043550	0.110502	6.63	-1.752	110	1	top1	0.11	2.3e-11	-1.752	0.0798
NA	./WEIGHTS//train_weights/Q04837.ENSG00000106028.wgt.RDat	ENSG00000106028.SSBP1	7	141438121	141487722	0.0175	rs7806657	2.73	rs11769672	0.00924	3.64	1.75	87	1	top1	0.0092	0.035	1.75	0.0801
NA	./WEIGHTS//train_weights/Q5W0Z9.ENSG00000180776.wgt.RDat	ENSG00000180776.ZDHHC20	13	21950263	22033509	0.1214	rs9552414	-3.02	rs6490653	0.022418	3.74	-1.227	127	127	bslmm	0.046	0.00021	-1.747	0.0806
NA	./WEIGHTS//train_weights/P57768.ENSG00000104497.wgt.RDat	ENSG00000104497.SNX16	8	82711816	82755101	0.0742	rs1451994	2.29	rs1817107	0.021396	4.06	2.088	101	101	bslmm	0.042	0.00022	1.7469	0.080655
NA	./WEIGHTS//train_weights/Q9BVS5.ENSG00000171103.wgt.RDat	ENSG00000171103.TRMT61B	2	29072687	29093167	0.1896	rs6714085	-3.365	rs3190	0.25032	9.73	-1.745	74	1	top1	0.25	5.5e-25	-1.745	0.081
NA	./WEIGHTS//train_weights/Q8N2K0.ENSG00000100997.wgt.RDat	ENSG00000100997.ABHD12	20	25275379	25371619	0.2138	rs3787081	-1.91	rs746748	0.089487	-6.03	-1.743	137	1	top1	0.089	2e-09	1.743	0.0813
NA	./WEIGHTS//train_weights/Q00973.ENSG00000135454.wgt.RDat	ENSG00000135454.B4GALNT1	12	58017193	58027138	0.0275	rs11172254	-2.88	rs923828	0.000798	-3.2	1.551	88	88	bslmm	0.0064	0.076	-1.7419	0.0815
NA	./WEIGHTS//train_weights/Q96PY6.ENSG00000137601.wgt.RDat	ENSG00000137601.NEK1	4	170314426	170533780	0.0977	rs17055068	-3.57	rs7678428	0.02914	3.97	1.74	131	1	top1	0.029	0.0014	1.74	0.0819
NA	./WEIGHTS//train_weights/P35270.ENSG00000116096.wgt.RDat	ENSG00000116096.SPR	2	73114489	73119287	0.0574	rs12619068	3.052	rs11693376	0.046284	4.7	1.772	50	2	lasso	0.05	7.2e-06	1.7391	0.082
NA	./WEIGHTS//train_weights/P17858.ENSG00000141959.wgt.RDat	ENSG00000141959.PFKL	21	45719934	45747259	0.0612	rs9977816	2.62	rs3761392	0.066277	-5.76	1.905	87	2	lasso	0.069	1.5e-07	-1.734	0.083
NA	./WEIGHTS//train_weights/P55789.ENSG00000127554.wgt.RDat	ENSG00000127554.GFER	16	2034208	2037750	0.0436	rs8045887	-4.3	rs1058474	0.0473	4.47	-1.723	86	1	top1	0.047	1.5e-05	-1.723	0.0849
NA	./WEIGHTS//train_weights/Q12797.ENSG00000198363.wgt.RDat	ENSG00000198363.ASPH	8	62413116	62627155	0.0355	rs10504329	-3.61	rs6471960	0.010905	3.94	0.171	182	14	enet	0.018	0.0056	-1.7194	0.085549
NA	./WEIGHTS//train_weights/Q9BZQ4.ENSG00000157064.wgt.RDat	ENSG00000157064.NMNAT2	1	183217372	183387737	0.14	rs2276879	3.21	rs16860611	0.082363	-5.06	-1.717	164	1	top1	0.082	1.7e-06	1.7172	0.0859
NA	./WEIGHTS//train_weights/P78324.ENSG00000198053.wgt.RDat	ENSG00000198053.SIRPA	20	1875154	1920543	0.5504	rs34148012	3.31	rs6075340	0.551556	-14.41	-1.716	162	1	top1	0.55	2.5e-67	1.716	0.0862
NA	./WEIGHTS//train_weights/Q8TD22.ENSG00000144040.wgt.RDat	ENSG00000144040.SFXN5	2	73169165	73302747	0.08	rs12619068	3.052	rs1048704	0.077776	5.57	1.715	96	1	top1	0.078	2.3e-08	1.715	0.0863
NA	./WEIGHTS//train_weights/Q8TC12.ENSG00000072042.wgt.RDat	ENSG00000072042.RDH11	14	68143518	68162531	0.1634	rs3742884	-2.797	rs718212	0.050843	4.65	2.121	96	5	lasso	0.074	4.8e-08	1.7093	0.0874
NA	./WEIGHTS//train_weights/Q99674.ENSG00000138028.wgt.RDat	ENSG00000138028.CGREF1	2	27321757	27341995	0.0341	rs11608	2.586	rs2304681	0.006542	3.54	1.89	74	74	blup	0.015	0.018	1.7057	0.0881
NA	./WEIGHTS//train_weights/Q7Z4G4.ENSG00000066651.wgt.RDat	ENSG00000066651.TRMT11	6	126307576	126360422	0.0808	rs9388462	3.08	rs10499133	-0.002833	3.66	0.501	69	69	blup	0.0081	0.051	1.7007	0.089
NA	./WEIGHTS//train_weights/Q7Z7K6.ENSG00000166582.wgt.RDat	ENSG00000166582.CENPV	17	16245848	16256970	0.0329	rs12946619	4.3	rs17779879	0.0646	5.08	1.7	73	1	top1	0.065	3.5e-07	1.7	0.0891
NA	./WEIGHTS//train_weights/O60503.ENSG00000162104.wgt.RDat	ENSG00000162104.ADCY9	16	4003388	4166186	0.1143	rs2531967	3.7	rs2230739	0.0675	-5.23	-0.193	179	4	lasso	0.079	1.9e-08	1.69824	0.0895
NA	./WEIGHTS//train_weights/Q9NZQ7.ENSG00000120217.wgt.RDat	ENSG00000120217.CD274	9	5450503	5470566	0.1033	rs10815236	-3.613	rs866066	0.108596	6.05	1.782	142	9	enet	0.11	4e-09	1.6951	0.09005
NA	./WEIGHTS//train_weights/Q12907.ENSG00000169223.wgt.RDat	ENSG00000169223.LMAN2	5	176758563	176778853	0.142	rs7732626	-2.56	rs2731663	0.006035	-4.36	-0.126	76	76	blup	0.016	0.0081	-1.695	0.09008
NA	./WEIGHTS//train_weights/P50995.ENSG00000122359.wgt.RDat	ENSG00000122359.ANXA11	10	81910645	81965328	0.287	rs1953600	-2.39	rs12763624	0.155551	-7.74	1.878	134	134	bslmm	0.16	5.6e-16	-1.69241	0.090567
NA	./WEIGHTS//train_weights/O60883.ENSG00000170075.wgt.RDat	ENSG00000170075.GPR37L1	1	202091986	202102720	0.056	rs12090875	2.12	rs11588918	0.022589	4.23	1.825	105	105	bslmm	0.025	0.0011	1.6911	0.0908
NA	./WEIGHTS//train_weights/Q8N442.ENSG00000151806.wgt.RDat	ENSG00000151806.GUF1	4	44680444	44702943	0.1561	rs1439354	-3.11	rs1547525	0.21182	-9.31	-2.306	87	6	lasso	0.28	1.5e-28	1.6785	0.0933
NA	./WEIGHTS//train_weights/Q13085.ENSG00000132142.wgt.RDat	ENSG00000132142.ACACA	17	35441923	35766909	0.1315	rs2158239	2.77	rs7501983	0.063	-5.04	0.796	117	16	enet	0.068	1.7e-07	-1.67502	0.0939
NA	./WEIGHTS//train_weights/Q6P4A7.ENSG00000183605.wgt.RDat	ENSG00000183605.SFXN4	10	120900279	120925179	0.2005	rs11198845	3.27	rs3740558	0.146577	-7.72	2.235	82	16	enet	0.17	8.1e-17	-1.67344	0.09424
NA	./WEIGHTS//train_weights/Q8NB37.ENSG00000177225.wgt.RDat	ENSG00000177225.PDDC1	11	767220	777488	0.0412	rs3895063	-2.04	rs12223324	0.014122	3.78	1.361	104	104	blup	0.025	0.0022	1.67055	0.09481
NA	./WEIGHTS//train_weights/Q13362.ENSG00000078304.wgt.RDat	ENSG00000078304.PPP2R5C	14	102228135	102394326	0.295	rs2720202	-3.413	rs736449	0.116748	-7.09	-1.805	93	29	enet	0.15	4.7e-15	1.6702	0.0949
NA	./WEIGHTS//train_weights/Q5T6V5.ENSG00000165118.wgt.RDat	ENSG00000165118.C9orf64	9	86553226	86571901	0.1459	rs7853235	-2.587	rs1572030	0.142731	-7.63	1.669	55	1	top1	0.14	2e-14	-1.669	0.09512
NA	./WEIGHTS//train_weights/Q8NI08.ENSG00000111912.wgt.RDat	ENSG00000111912.NCOA7	6	126102307	126252266	0.1149	rs9388462	3.08	rs10872303	0.007611	4.15	-2.257	109	109	blup	0.047	1.4e-05	-1.6614	0.0966
NA	./WEIGHTS//train_weights/P29536.ENSG00000163431.wgt.RDat	ENSG00000163431.LMOD1	1	201865580	201915715	0.0479	rs12090635	-1.94	rs2172935	0.027374	-3.75	-1.661	105	1	top1	0.027	0.0021	1.661	0.0967
NA	./WEIGHTS//train_weights/P10768.ENSG00000139684.wgt.RDat	ENSG00000139684.ESD	13	47345391	47371367	0.213	rs1805055	2.51	rs8192892	0.107189	-6.69	2.045	163	12	enet	0.15	1.2e-14	-1.659	0.0971
NA	./WEIGHTS//train_weights/O14967.ENSG00000153132.wgt.RDat	ENSG00000153132.CLGN	4	141309609	141349122	0.2359	rs11934649	2.15	rs2668585	0.11072	-6.43	1.906	102	21	enet	0.13	6.2e-13	-1.6568	0.0976
NA	./WEIGHTS//train_weights/Q96NW4.ENSG00000105186.wgt.RDat	ENSG00000105186.ANKRD27	19	33087913	33167503	0.0663	rs1827700	2.81	rs731674	0.010551	-3.59	1.131	124	124	blup	0.029	0.00062	-1.6537	0.0982
NA	./WEIGHTS//train_weights/Q9NXW9.ENSG00000160993.wgt.RDat	ENSG00000160993.ALKBH4	7	102096685	102105323	0.0776	rs1131383	-2.04	rs2410988	0.032143	-4.65	-1.003	40	40	blup	0.05	1.6e-05	1.6538	0.0982
NA	./WEIGHTS//train_weights/Q9BWQ8.ENSG00000135472.wgt.RDat	ENSG00000135472.FAIM2	12	50260679	50298000	0.0585	rs3759129	-2.39	rs706795	0.022781	4.43	-2.271	105	105	blup	0.039	8.2e-05	-1.6514	0.0987
NA	./WEIGHTS//train_weights/Q9BVM2.ENSG00000166171.wgt.RDat	ENSG00000166171.DPCD	10	103330317	103369425	0.0856	rs3915773	-2.51	rs7006	0.064526	5.16	1.647	67	1	top1	0.065	1.3e-06	1.647	0.099558
NA	./WEIGHTS//train_weights/Q9BY42.ENSG00000022277.wgt.RDat	ENSG00000022277.RTFDC1	20	55043647	55093943	0.1726	rs11905734	-2.43	rs6024911	0.169791	-7.81	-1.738	116	4	lasso	0.18	2.1e-16	1.643	0.1004
NA	./WEIGHTS//train_weights/Q00059.ENSG00000108064.wgt.RDat	ENSG00000108064.TFAM	10	60144782	60158981	0.0389	rs12247015	1.74	rs11006132	0.029316	-4.22	1.642	86	1	top1	0.029	0.0005	-1.642	0.10059
NA	./WEIGHTS//train_weights/Q9H0P0.ENSG00000122643.wgt.RDat	ENSG00000122643.NT5C3A	7	33053742	33102409	0.0733	rs12536300	2.66	rs3915352	0.027978	4.34	-0.739	101	19	enet	0.053	3.9e-06	-1.6387	0.101
NA	./WEIGHTS//train_weights/P35443.ENSG00000113296.wgt.RDat	ENSG00000113296.THBS4	5	79287134	79379110	0.0962	rs4535437	-2.72	rs10474606	0.070063	5.04	1.64	125	1	top1	0.07	5.5e-07	1.64	0.10101
NA	./WEIGHTS//train_weights/P24666.ENSG00000143727.wgt.RDat	ENSG00000143727.ACP1	2	264140	278283	0.2398	rs6724817	-2.563	rs9213	0.356063	-11.7	1.637	96	1	top1	0.36	7.5e-38	-1.637	0.102
NA	./WEIGHTS//train_weights/Q9NY64.ENSG00000136856.wgt.RDat	ENSG00000136856.SLC2A8	9	130159421	130170703	0.1892	rs4350073	2.91	rs4837144	0.140021	-6.21	0.795	96	5	lasso	0.18	7.8e-11	-1.6351	0.10203
NA	./WEIGHTS//train_weights/Q96AM1.ENSG00000172935.wgt.RDat	ENSG00000172935.MRGPRF	11	68771863	68780877	0.2733	rs11228450	-2.13	rs2846196	0.120466	5.17	-1.632	93	1	top1	0.12	4.3e-07	-1.632	0.10268
NA	./WEIGHTS//train_weights/Q02978.ENSG00000108528.wgt.RDat	ENSG00000108528.SLC25A11	17	4840425	4843546	0.039	rs17633650	2.54	rs2586532	-0.000206	-3.11	-0.446	95	95	bslmm	0.015	0.0094	1.6206	0.105
NA	./WEIGHTS//train_weights/Q53EU6.ENSG00000138678.wgt.RDat	ENSG00000138678.AGPAT9	4	84457067	84527028	0.0688	rs10016545	2.32	rs7674135	0.02157	-3.78	-1.293	108	108	bslmm	0.026	0.0084	1.6218	0.105
NA	./WEIGHTS//train_weights/O00628.ENSG00000112357.wgt.RDat	ENSG00000112357.PEX7	6	137143717	137235075	0.0885	rs6925103	-2.83	rs2295592	0.014909	-3.36	-0.94	112	3	lasso	0.045	0.00046	1.619	0.105
NA	./WEIGHTS//train_weights/Q15814.ENSG00000124659.wgt.RDat	ENSG00000124659.TBCC	6	42712219	42714558	0.3932	rs1981008	1.97	rs2234026	0.150617	-7.98	-1.712	71	71	bslmm	0.16	1e-15	1.6216	0.105
NA	./WEIGHTS//train_weights/Q5VZ89.ENSG00000137145.wgt.RDat	ENSG00000137145.DENND4C	9	19230433	19374139	0.0905	rs7039231	3.68	rs1329730	0.015594	4.17	-0.408	108	108	bslmm	0.04	5.4e-05	-1.6195	0.10535
NA	./WEIGHTS//train_weights/Q9H974.ENSG00000151576.wgt.RDat	ENSG00000151576.QTRTD1	3	113724680	113807269	0.0677	rs324556	2.28	rs2306730	0.008241	-3.16	-1.215	92	92	blup	0.016	0.03	1.6149	0.10634
NA	./WEIGHTS//train_weights/Q9BXJ8.ENSG00000189077.wgt.RDat	ENSG00000189077.TMEM120A	7	75616155	75623977	0.0673	rs8509	2.07	rs7794040	0.053751	-5.14	1.918	73	9	enet	0.059	1.4e-06	-1.6141	0.107
NA	./WEIGHTS//train_weights/Q86VN1.ENSG00000136100.wgt.RDat	ENSG00000136100.VPS36	13	52986737	53024763	0.1508	rs4884452	1.76	rs12430144	0.054931	-5.47	1.417	49	2	lasso	0.067	2.2e-07	-1.611	0.1072
NA	./WEIGHTS//train_weights/P36551.ENSG00000080819.wgt.RDat	ENSG00000080819.CPOX	3	98239976	98312567	0.342	rs1461158	-2.56	rs1131857	0.245365	-9.71	1.477	88	22	enet	0.26	5.9e-26	-1.6103	0.10734
NA	./WEIGHTS//train_weights/Q6ZNW5.ENSG00000183208.wgt.RDat	ENSG00000183208.GDPGP1	15	90777040	90785315	0.4716	rs4324103	-2.57	rs10152994	0.31917	-10.98	-1.819	94	7	lasso	0.38	1.5e-39	1.60925	0.10756
NA	./WEIGHTS//train_weights/Q9Y619.ENSG00000102743.wgt.RDat	ENSG00000102743.SLC25A15	13	41363548	41384247	0.1695	rs1854420	1.84	rs1536807	0.096208	5.32	-1.609	46	1	top1	0.096	1.5e-07	-1.609	0.1076
NA	./WEIGHTS//train_weights/Q9HC36.ENSG00000171861.wgt.RDat	ENSG00000171861.RNMTL1	17	685513	695749	0.053	rs660732	-2.21	rs3087833	0.0481	-4.59	1.606	101	1	top1	0.048	1.1e-05	-1.606	0.108
NA	./WEIGHTS//train_weights/P83436.ENSG00000168434.wgt.RDat	ENSG00000168434.COG7	16	23399814	23464501	0.0179	rs250563	1.78	rs250583	0.0196	3.85	1.603	103	1	top1	0.02	0.0038	1.603	0.109
NA	./WEIGHTS//train_weights/Q9UHC7.ENSG00000133606.wgt.RDat	ENSG00000133606.MKRN1	7	140152840	140179369	0.19	rs4726825	2.33	rs12155423	0.081798	-6.01	-1.425	96	5	lasso	0.085	5.4e-09	1.6039	0.109
NA	./WEIGHTS//train_weights/P30038.ENSG00000159423.wgt.RDat	ENSG00000159423.ALDH4A1	1	19197926	19229275	0.1503	rs4911985	2.64	rs9426794	0.09987	6.22	-1.621	105	3	lasso	0.1	1.2e-10	-1.5901	0.112
NA	./WEIGHTS//train_weights/Q6PKH6.ENSG00000187630.wgt.RDat	ENSG00000187630.DHRS4L2	14	24439148	24475617	0.3442	rs10135026	-3.014	rs8022613	0.169959	-8.71	-0.871	61	14	lasso	0.27	1.9e-26	1.5883	0.1122
NA	./WEIGHTS//train_weights/P22392.ENSG00000243678.wgt.RDat	ENSG00000243678.NME1-NME2	17	49230920	49249108	0.0882	rs41524846	2.17	rs10514981	0.0635	-5.1	1.587	67	1	top1	0.063	4.4e-07	-1.587	0.113
NA	./WEIGHTS//train_weights/O43150.ENSG00000151693.wgt.RDat	ENSG00000151693.ASAP2	2	9346894	9545812	0.0383	rs4610024	1.714	rs11676012	0.002459	-4	1.374	159	159	blup	0.018	0.0057	-1.5862	0.113
NA	./WEIGHTS//train_weights/Q96BR5.ENSG00000162377.wgt.RDat	ENSG00000162377.COA7	1	53152508	53164038	0.149	rs7518390	3.5	rs443751	0.214455	-9.52	-1.581	91	1	top1	0.21	1.3e-21	1.581	0.114
NA	./WEIGHTS//train_weights/Q00796.ENSG00000140263.wgt.RDat	ENSG00000140263.SORD	15	45315302	45369383	0.2447	rs2002813	2.88	rs8043226	-0.0026	3.32	1.674	71	18	enet	0.023	0.0018	1.57293	0.11574
NA	./WEIGHTS//train_weights/O94759.ENSG00000142185.wgt.RDat	ENSG00000142185.TRPM2	21	45770046	45862964	0.0913	rs4169	-2.56	rs2838552	0.054371	-4.21	-1.568	69	1	top1	0.054	0.00035	1.568	0.1169
NA	./WEIGHTS//train_weights/Q8WVC6.ENSG00000172992.wgt.RDat	ENSG00000172992.DCAKD	17	43100708	43138473	0.0503	rs7224944	-3.66	rs2239919	0.00892	-3.7	1.463	107	14	enet	0.036	0.00013	-1.55744	0.119
NA	./WEIGHTS//train_weights/P28161.ENSG00000213366.wgt.RDat	ENSG00000213366.GSTM2	1	110210644	110252171	0.2829	rs17598321	4.32	rs3754446	0.156145	-8.54	-0.365	89	25	enet	0.25	2.3e-25	1.5538	0.12
NA	./WEIGHTS//train_weights/P34949.ENSG00000178802.wgt.RDat	ENSG00000178802.MPI	15	75182346	75191798	0.1063	rs936227	-3.06	rs8031937	0.15727	-8.4	-0.792	79	10	enet	0.19	2.2e-19	1.55442	0.12008
NA	./WEIGHTS//train_weights/Q9BTZ2.ENSG00000157326.wgt.RDat	ENSG00000157326.DHRS4	14	24422795	24438488	0.4219	rs10135026	-3.014	rs8022613	0.284686	-10.31	-0.871	62	14	lasso	0.38	6.7e-40	1.5517	0.1207
NA	./WEIGHTS//train_weights/Q02083.ENSG00000138744.wgt.RDat	ENSG00000138744.NAAA	4	76831809	76862204	0.3106	rs17220803	-3.86	rs7670521	0.18921	-7.32	-1.092	116	13	enet	0.27	3.6e-18	1.5521	0.121
NA	./WEIGHTS//train_weights/P15559.ENSG00000181019.wgt.RDat	ENSG00000181019.NQO1	16	69740899	69760854	0.3444	rs1064825	-2.6	rs1437135	0.347	-11.99	-1.533	74	19	enet	0.44	6.6e-49	1.54729	0.122
NA	./WEIGHTS//train_weights/P16455.ENSG00000170430.wgt.RDat	ENSG00000170430.MGMT	10	131265448	131566271	0.1654	rs1711639	2.18	rs477692	0.070843	5.94	-1.254	286	18	enet	0.17	1.2e-16	-1.54406	0.122574
NA	./WEIGHTS//train_weights/P54284.ENSG00000167535.wgt.RDat	ENSG00000167535.CACNB3	12	49207577	49222724	0.0465	rs11168732	-1.8	rs12369114	0.038312	-4.11	1.541	79	1	top1	0.038	7.9e-05	-1.541	0.123
NA	./WEIGHTS//train_weights/P78333.ENSG00000179399.wgt.RDat	ENSG00000179399.GPC5	13	92050929	93519490	0.1088	rs9516113	-2.86	rs9523348	0.00732	-4.59	-1.531	725	22	enet	0.05	7.3e-06	1.541	0.1233
NA	./WEIGHTS//train_weights/Q6P1S2.ENSG00000174928.wgt.RDat	ENSG00000174928.C3orf33	3	155480401	155524140	0.2579	rs6809229	-2.32	rs358733	0.254902	-9.94	-1.539	96	1	top1	0.25	5e-25	1.539	0.1238
NA	./WEIGHTS//train_weights/Q9BUT1.ENSG00000164039.wgt.RDat	ENSG00000164039.BDH2	4	104000592	104021040	0.3336	rs6858419	-1.85	rs6830624	0.02856	4.18	-0.97	87	5	lasso	0.051	5.5e-06	-1.54	0.124
NA	./WEIGHTS//train_weights/Q08378.ENSG00000090615.wgt.RDat	ENSG00000090615.GOLGA3	12	133345495	133405444	0.0978	rs2291256	-2.57	rs12303977	0.066637	5.41	-0.14	101	101	blup	0.067	3e-07	-1.5249	0.127
NA	./WEIGHTS//train_weights/Q9UIC8.ENSG00000205629.wgt.RDat	ENSG00000205629.LCMT1	16	25123050	25189552	0.0359	rs11644078	2.22	rs2881053	0.0187	-3.83	1.598	108	108	bslmm	0.019	0.0039	-1.52795	0.127
NA	./WEIGHTS//train_weights/Q96LD8.ENSG00000166192.wgt.RDat	ENSG00000166192.SENP8	15	72406599	72433311	0.0878	rs8192373	-1.34	rs7182776	0.0721	-5.39	-1.201	57	26	enet	0.086	9.3e-09	1.52255	0.12787
NA	./WEIGHTS//train_weights/Q13336.ENSG00000141469.wgt.RDat	ENSG00000141469.SLC14A1	18	43304092	43332485	0.1701	rs12326162	-2.95	rs10853535	0.137	7.06	1.648	170	23	enet	0.14	1.6e-13	1.522	0.12792
NA	./WEIGHTS//train_weights/P48507.ENSG00000023909.wgt.RDat	ENSG00000023909.GCLM	1	94350761	94374966	0.049	rs1889547	-2.11	rs11165030	0.02562	-4.05	-0.818	103	103	blup	0.043	3.1e-05	1.5221	0.128
NA	./WEIGHTS//train_weights/Q86V87.ENSG00000158863.wgt.RDat	ENSG00000158863.FAM160B2	8	21946670	21962409	0.0335	rs6557781	-2.88	rs7823952	0.034584	-4.22	1.521	91	1	top1	0.035	0.00022	-1.521	0.12826
NA	./WEIGHTS//train_weights/Q9UIJ7.ENSG00000147853.wgt.RDat	ENSG00000147853.AK3	9	4711155	4742043	0.338	rs1048020	-3.299	rs435100	0.044786	-6.59	0.911	153	17	enet	0.22	4e-22	-1.5208	0.12831
NA	./WEIGHTS//train_weights/P47870.ENSG00000145864.wgt.RDat	ENSG00000145864.GABRB2	5	160715436	160976050	0.0477	rs10515829	-1.72	rs592403	-0.000281	-3.26	-1.2	189	189	bslmm	0.017	0.0061	1.5159	0.12955
NA	./WEIGHTS//train_weights/Q96C01.ENSG00000035141.wgt.RDat	ENSG00000035141.FAM136A	2	70523107	70529222	0.1138	rs4852500	3.615	rs4852161	0.057399	-4.88	-1.516	84	1	top1	0.057	1.6e-06	1.516	0.13
NA	./WEIGHTS//train_weights/Q9BT30.ENSG00000125652.wgt.RDat	ENSG00000125652.ALKBH7	19	6372444	6375042	0.0997	rs193234	2.51	rs7540	0.063534	-5.32	1.511	78	1	top1	0.064	6.6e-05	-1.511	0.1308
NA	./WEIGHTS//train_weights/Q9UJJ9.ENSG00000090581.wgt.RDat	ENSG00000090581.GNPTG	16	1401924	1413352	0.0724	rs1132356	-2.1	rs9926835	0.0615	4.47	-1.509	76	1	top1	0.061	6.8e-05	-1.509	0.131
NA	./WEIGHTS//train_weights/Q9Y2V2.ENSG00000153048.wgt.RDat	ENSG00000153048.CARHSP1	16	8946799	8962866	0.065	rs4985056	2.92	rs2437704	0.0468	4.84	1.274	126	5	lasso	0.052	4.5e-06	1.51072	0.131
NA	./WEIGHTS//train_weights/Q9UH65.ENSG00000133789.wgt.RDat	ENSG00000133789.SWAP70	11	9685624	9774538	0.097	rs737617	2.42	rs737617	0.055761	-6.07	2.415	122	122	blup	0.071	1e-07	-1.51014	0.13101
NA	./WEIGHTS//train_weights/Q96JY6.ENSG00000120913.wgt.RDat	ENSG00000120913.PDLIM2	8	22435792	22455538	0.2504	rs3736147	3.61	rs3735894	0.08584	-6.09	3.142	126	23	enet	0.13	2.2e-13	-1.5084	0.13145
NA	./WEIGHTS//train_weights/P55327.ENSG00000076554.wgt.RDat	ENSG00000076554.TPD52	8	80870571	81143467	0.0759	rs4740098	-3.22	rs9643750	0.058875	4.97	1.508	112	1	top1	0.059	1.1e-06	1.508	0.131555
NA	./WEIGHTS//train_weights/P08397.ENSG00000256269.wgt.RDat	ENSG00000256269.HMBS	11	118955576	118964259	0.1512	rs599385	-3.48	rs620331	0.092472	-5.93	0.993	94	94	blup	0.1	1.3e-10	-1.5054	0.13222
NA	./WEIGHTS//train_weights/Q9Y5S2.ENSG00000198752.wgt.RDat	ENSG00000198752.CDC42BPB	14	103398716	103523799	0.0778	rs7857	2.859	rs1190234	0.021194	4.51	-1.983	99	99	bslmm	0.039	7.2e-05	-1.5036	0.1327
NA	./WEIGHTS//train_weights/Q6NSJ0.ENSG00000164976.wgt.RDat	ENSG00000164976.KIAA1161	9	34366668	34376851	0.1972	rs3737242	3.712	rs2381117	0.205628	-8.42	-2.063	74	10	enet	0.22	4.1e-18	1.5019	0.13311
NA	./WEIGHTS//train_weights/Q69YN2.ENSG00000095485.wgt.RDat	ENSG00000095485.CWF19L1	10	101992055	102027437	0.1364	rs11557927	1.85	rs11597086	0.150858	7.45	-1.499	107	1	top1	0.15	1.9e-14	-1.499	0.133874
NA	./WEIGHTS//train_weights/Q96EY8.ENSG00000139428.wgt.RDat	ENSG00000139428.MMAB	12	109991542	110011679	0.3027	rs10161126	2.15	rs2302706	0.466101	-13.65	-1.776	112	41	enet	0.5	4.8e-59	1.4942	0.135
NA	./WEIGHTS//train_weights/Q99807.ENSG00000167186.wgt.RDat	ENSG00000167186.COQ7	16	19078921	19091417	0.212	rs8062326	-2.14	rs12935719	0.234	9.57	-1.984	84	17	enet	0.24	1e-23	-1.49387	0.135
NA	./WEIGHTS//train_weights/Q9H9C1.ENSG00000151445.wgt.RDat	ENSG00000151445.VIPAS39	14	77893018	77924295	0.1017	rs8012228	3.196	rs17824094	0.042893	-5.38	-1.227	107	6	lasso	0.07	1.1e-07	1.4942	0.1351
NA	./WEIGHTS//train_weights/Q96EY4.ENSG00000198498.wgt.RDat	ENSG00000198498.TMA16	4	164415594	164441691	0.2888	rs17576350	2.28	rs13130399	0.28521	-7.85	-1.489	115	1	top1	0.29	6.4e-16	1.489	0.136
NA	./WEIGHTS//train_weights/Q9UBK8.ENSG00000124275.wgt.RDat	ENSG00000124275.MTRR	5	7851299	7906138	0.1979	rs1460968	1.99	rs3733784	0.087485	6.32	-0.701	183	27	enet	0.18	1.9e-14	-1.4836	0.1379
NA	./WEIGHTS//train_weights/Q5SWX8.ENSG00000157181.wgt.RDat	ENSG00000157181.C1orf27	1	186344890	186390510	0.1348	rs3131549	2.72	rs1547084	0.080275	5.57	-2.293	80	19	enet	0.12	5.9e-12	-1.4845	0.138
NA	./WEIGHTS//train_weights/P34947.ENSG00000198873.wgt.RDat	ENSG00000198873.GRK5	10	120967101	121215131	0.0609	rs10510056	3.77	rs3808955	-0.002099	3.35	0.716	221	221	blup	0.026	0.0011	-1.47855	0.139262
NA	./WEIGHTS//train_weights/Q96N66.ENSG00000125505.wgt.RDat	ENSG00000125505.MBOAT7	19	54677107	54693733	0.0488	rs12985735	-1.91	rs36655	0.024344	3.99	-1.474	93	1	top1	0.024	0.0014	-1.474	0.1405
NA	./WEIGHTS//train_weights/Q8WXI4.ENSG00000162390.wgt.RDat	ENSG00000162390.ACOT11	1	55007930	55104865	0.2824	rs299872	-3.09	rs1368883	0.224435	9.45	-1.243	156	6	lasso	0.25	2e-24	-1.4716	0.141
NA	./WEIGHTS//train_weights/Q9HBZ2.ENSG00000172379.wgt.RDat	ENSG00000172379.ARNT2	15	80696692	80890278	0.0603	rs3848175	-2.35	rs3901896	0.01431	4.49	1.064	175	175	bslmm	0.031	0.00038	1.46969	0.14165
NA	./WEIGHTS//train_weights/Q8WUR7.ENSG00000169609.wgt.RDat	ENSG00000169609.C15orf40	15	83657193	83680393	0.1166	rs6603042	-1.9	rs4842860	0.12926	8.03	1.141	69	8	enet	0.2	1.1e-19	1.46926	0.14176
NA	./WEIGHTS//train_weights/P29144.ENSG00000134900.wgt.RDat	ENSG00000134900.TPP2	13	103249353	103331521	0.0357	rs9514030	-3.73	rs1927014	0.016988	-4.49	1.465	192	1	top1	0.017	0.0065	-1.465	0.1429
NA	./WEIGHTS//train_weights/Q9BQI9.ENSG00000053702.wgt.RDat	ENSG00000053702.NRIP2	12	2934514	2944710	0.0466	rs7973927	2.17	rs11833073	0.023899	-4.12	1.13	83	83	bslmm	0.029	0.00059	-1.4616	0.144
NA	./WEIGHTS//train_weights/Q9BRT2.ENSG00000137288.wgt.RDat	ENSG00000137288.UQCC2	6	33662070	33679504	0.0394	rs4711348	-2.59	rs2296330	0.012866	-4.37	0.281	183	183	blup	0.03	0.00048	-1.461	0.144
NA	./WEIGHTS//train_weights/P22061.ENSG00000120265.wgt.RDat	ENSG00000120265.PCMT1	6	150070579	150132556	0.1222	rs10872646	1.56	rs1112730	0.106468	-6.47	1.456	87	1	top1	0.11	5.4e-11	-1.456	0.145
NA	./WEIGHTS//train_weights/Q9NUB1.ENSG00000154930.wgt.RDat	ENSG00000154930.ACSS1	20	24986868	25039616	0.0699	rs6050338	2.23	rs7266451	0.000484	3.68	0.386	128	128	bslmm	0.028	0.00069	1.457	0.1452
NA	./WEIGHTS//train_weights/P16278.ENSG00000170266.wgt.RDat	ENSG00000170266.GLB1	3	33038100	33138722	0.053	rs7620019	2.8	rs4423716	0.069109	-5.44	-1.455	121	1	top1	0.069	1.4e-07	1.455	0.14567
NA	./WEIGHTS//train_weights/P25189.ENSG00000158887.wgt.RDat	ENSG00000158887.MPZ	1	161274525	161279762	0.3112	rs2307426	-2.81	rs7550839	0.284302	8.35	-1.173	103	3	lasso	0.29	8.7e-20	-1.4531	0.146
NA	./WEIGHTS//train_weights/Q14344.ENSG00000120063.wgt.RDat	ENSG00000120063.GNA13	17	63006833	63052957	0.0301	rs7218921	-2.04	rs299826	0.0122	3.56	-1.75	55	7	enet	0.017	0.0066	-1.45081	0.147
NA	./WEIGHTS//train_weights/Q9HA82.ENSG00000090661.wgt.RDat	ENSG00000090661.CERS4	19	8271620	8327305	0.0867	rs1466448	-3.23	rs17160332	0.037282	4.63	1.449	96	1	top1	0.037	0.00026	1.449	0.1473
NA	./WEIGHTS//train_weights/Q96EQ0.ENSG00000197860.wgt.RDat	ENSG00000197860.SGTB	5	64961755	65018862	0.0923	rs2561212	-1.74	rs1549192	0.085052	-6.08	1.448	122	1	top1	0.085	5e-09	-1.448	0.14762
NA	./WEIGHTS//train_weights/Q9HCP6.ENSG00000010282.wgt.RDat	ENSG00000010282.HHATL	3	42734155	42744319	0.1098	rs11929390	1.69	rs12635736	0.084301	-5.94	1.63	95	95	blup	0.092	2.3e-09	-1.4477	0.1477
NA	./WEIGHTS//train_weights/Q8TAG9.ENSG00000138190.wgt.RDat	ENSG00000138190.EXOC6	10	94590935	94819250	0.0665	rs11187247	-3.08	rs980204	0.054609	4.98	-0.127	210	210	bslmm	0.056	2e-06	-1.44679	0.147955
NA	./WEIGHTS//train_weights/Q9H3F6.ENSG00000110906.wgt.RDat	ENSG00000110906.KCTD10	12	109886461	109915349	0.0458	rs7968387	-2.56	rs1477117	0.00394	3.82	-1.91	120	120	bslmm	0.035	0.00015	-1.4464	0.148
NA	./WEIGHTS//train_weights/P49902.ENSG00000076685.wgt.RDat	ENSG00000076685.NT5C2	10	104845940	104953056	0.0375	rs3781283	2.88	rs11191506	0.027509	3.93	-0.743	95	95	blup	0.039	7.4e-05	-1.44488	0.148492
NA	./WEIGHTS//train_weights/Q8NFU3.ENSG00000215845.wgt.RDat	ENSG00000215845.TSTD1	1	161007421	161008780	0.1593	rs12403334	2.09	rs11265548	0.066957	6.57	-0.217	88	88	blup	0.15	2.5e-15	-1.4432	0.149
NA	./WEIGHTS//train_weights/Q8TCA0.ENSG00000172731.wgt.RDat	ENSG00000172731.LRRC20	10	72058729	72142382	0.1197	rs10823525	2.42	rs3812699	0.000579	3.5	-0.18	153	23	enet	0.055	2.6e-06	-1.44038	0.149759
NA	./WEIGHTS//train_weights/Q8TCU6.ENSG00000124126.wgt.RDat	ENSG00000124126.PREX1	20	47240790	47444420	0.0556	rs2024594	3.33	rs6090915	0.018385	4.54	0.4	229	229	blup	0.029	0.00053	1.44	0.1499
NA	./WEIGHTS//train_weights/Q8IWA5.ENSG00000129353.wgt.RDat	ENSG00000129353.SLC44A2	19	10713133	10755235	0.0264	rs3087689	-3.12	rs11085744	0.01507	4.07	1.056	85	85	blup	0.035	0.00016	1.4381	0.1504
NA	./WEIGHTS//train_weights/Q5SRE7.ENSG00000175287.wgt.RDat	ENSG00000175287.PHYHD1	9	131683174	131704320	0.2359	rs2287363	-1.726	rs10113912	0.391196	-12.36	-1.417	63	13	enet	0.4	4.5e-43	1.4362	0.15095
NA	./WEIGHTS//train_weights/Q15057.ENSG00000114331.wgt.RDat	ENSG00000114331.ACAP2	3	194995465	195163807	0.0403	rs7621133	1.79	rs2050809	0.035508	4.24	-1.435	115	1	top1	0.036	0.00014	-1.435	0.15129
NA	./WEIGHTS//train_weights/Q9BRQ6.ENSG00000159685.wgt.RDat	ENSG00000159685.CHCHD6	3	126423063	126679249	0.0555	rs3749395	-2.06	rs9852440	0.051494	-5.71	-1.54	174	174	blup	0.068	1.6e-07	1.4343	0.15148
NA	./WEIGHTS//train_weights/Q9Y5S1.ENSG00000187688.wgt.RDat	ENSG00000187688.TRPV2	17	16318856	16340317	0.483	rs3112518	3.92	rs3813769	0.47	-13.46	1.432	83	1	top1	0.47	8.5e-54	-1.432	0.152
NA	./WEIGHTS//train_weights/P60983.ENSG00000197045.wgt.RDat	ENSG00000197045.GMFB	14	54941202	54955914	0.0357	rs17127632	-2.477	rs9323267	0.00291	3.77	-1.715	66	8	enet	0.0085	0.04	-1.431	0.1524
NA	./WEIGHTS//train_weights/Q75V66.ENSG00000171714.wgt.RDat	ENSG00000171714.ANO5	11	22214722	22304903	0.2982	rs7126852	-2.04	rs4275631	0.248675	7.73	1.666	89	8	lasso	0.26	4.6e-17	1.42901	0.153
NA	./WEIGHTS//train_weights/P42658.ENSG00000130226.wgt.RDat	ENSG00000130226.DPP6	7	153584182	154685995	0.1087	rs17338902	3.17	rs1047064	0.012565	-4.17	0.994	677	677	blup	0.023	0.002	-1.4248	0.154
NA	./WEIGHTS//train_weights/Q8IZ83.ENSG00000161618.wgt.RDat	ENSG00000161618.ALDH16A1	19	49956426	49974305	0.1808	rs1578944	-1.75	rs7258719	0.161752	8.53	-1.23	78	12	enet	0.18	7.1e-18	-1.4245	0.1543
NA	./WEIGHTS//train_weights/O94874.ENSG00000014123.wgt.RDat	ENSG00000014123.UFL1	6	96969471	97003152	0.0343	rs6934392	-2.43	rs2983897	0.045709	4.63	-1.423	79	1	top1	0.046	1.7e-05	-1.423	0.155
NA	./WEIGHTS//train_weights/Q5T013.ENSG00000178922.wgt.RDat	ENSG00000178922.HYI	1	43916824	43919660	0.1795	rs3768048	2.68	rs6954	0.142174	7.42	-0.985	77	15	enet	0.15	1.2e-14	-1.4172	0.156
NA	./WEIGHTS//train_weights/Q9UPN3.ENSG00000127603.wgt.RDat	ENSG00000127603.MACF1	1	39546988	39952849	0.0414	rs3116389	2.4	rs1539435	0.031203	-4.18	1.416	203	1	top1	0.031	0.00034	-1.416	0.157
NA	./WEIGHTS//train_weights/O60443.ENSG00000105928.wgt.RDat	ENSG00000105928.DFNA5	7	24737972	24809244	0.2002	rs10248833	-2.97	rs2237306	0.126332	6.96	-0.629	137	18	enet	0.16	2.2e-15	-1.4155	0.157
NA	./WEIGHTS//train_weights/Q96BW5.ENSG00000165983.wgt.RDat	ENSG00000165983.PTER	10	16478942	16555736	0.1916	rs17138613	2.87	rs1532104	0.248071	-10.09	1.619	150	17	enet	0.26	8.9e-25	-1.41203	0.157942
NA	./WEIGHTS//train_weights/P16219.ENSG00000122971.wgt.RDat	ENSG00000122971.ACADS	12	121163538	121177811	0.5534	rs541619	-2.63	rs2014355	0.370511	-12.05	-1.19	116	6	lasso	0.44	1.5e-48	1.4113	0.158
NA	./WEIGHTS//train_weights/O60716.ENSG00000198561.wgt.RDat	ENSG00000198561.CTNND1	11	57520715	57587018	0.0302	rs11570196	2.27	rs499188	0.028869	-3.73	-1.348	60	60	blup	0.029	0.00054	1.40511	0.15999
NA	./WEIGHTS//train_weights/Q96CD2.ENSG00000138621.wgt.RDat	ENSG00000138621.PPCDC	15	75315896	75409803	0.0612	rs17337152	-2.96	rs35556055	0.00892	-4.2	2.579	67	67	blup	0.056	3.8e-05	-1.40321	0.16055
NA	./WEIGHTS//train_weights/Q9Y426.ENSG00000157617.wgt.RDat	ENSG00000157617.C2CD2	21	43305221	43373999	0.076	rs511247	3.09	rs2839403	0.050764	4.67	-1.403	205	1	top1	0.051	6.1e-06	-1.403	0.1606
NA	./WEIGHTS//train_weights/Q96AT9.ENSG00000197713.wgt.RDat	ENSG00000197713.RPE	2	210867289	210886300	0.0575	rs12468576	2.143	rs2723211	0.06888	5.86	-1.092	46	4	lasso	0.076	3.4e-08	-1.4022	0.161
NA	./WEIGHTS//train_weights/Q8IV38.ENSG00000106524.wgt.RDat	ENSG00000106524.ANKMY2	7	16639401	16685442	0.135	rs696281	2.47	rs7797003	0.128288	7.02	-1.395	171	1	top1	0.13	4.8e-13	-1.395	0.163
NA	./WEIGHTS//train_weights/Q01432.ENSG00000133805.wgt.RDat	ENSG00000133805.AMPD3	11	10329860	10529126	0.1611	rs7948666	4.13	rs11604833	0.123332	6.91	0.564	171	171	bslmm	0.13	1.5e-13	1.38914	0.16479
NA	./WEIGHTS//train_weights/P15927.ENSG00000117748.wgt.RDat	ENSG00000117748.RPA2	1	28218035	28241257	0.0267	rs4908382	3.59	rs17257252	0.044028	4.41	-1.39	69	1	top1	0.044	2.4e-05	-1.39	0.165
NA	./WEIGHTS//train_weights/Q8WUF8.ENSG00000113391.wgt.RDat	ENSG00000113391.FAM172A	5	92953775	93447404	0.0452	rs12515593	-1.87	rs9314093	0.0641	5.4	1.024	162	2	lasso	0.084	8.6e-09	1.3842	0.16629
NA	./WEIGHTS//train_weights/P17252.ENSG00000154229.wgt.RDat	ENSG00000154229.PRKCA	17	64298754	64806861	0.0922	rs8074995	-2.6	rs6504459	0.0349	5.28	-1.604	386	16	enet	0.058	1.4e-06	-1.38108	0.167
NA	./WEIGHTS//train_weights/Q9UJ83.ENSG00000131373.wgt.RDat	ENSG00000131373.HACL1	3	15602211	15643338	0.3798	rs17041442	2.49	rs2455853	0.036978	-4.65	-1.235	88	33	enet	0.2	5.1e-19	1.3798	0.16763
NA	./WEIGHTS//train_weights/Q01130.ENSG00000161547.wgt.RDat	ENSG00000161547.SRSF2	17	74730197	74733456	0.0297	rs2429452	-3.1	rs7220712	0.00194	-3.67	-1.792	78	78	bslmm	0.019	0.0041	1.37456	0.169
NA	./WEIGHTS//train_weights/Q9BPU6.ENSG00000157851.wgt.RDat	ENSG00000157851.DPYSL5	2	27070615	27173219	0.1548	rs10181777	2.699	rs41448746	0.079676	-6.38	2.101	87	87	blup	0.11	1.4e-11	-1.3753	0.169
NA	./WEIGHTS//train_weights/Q9BQE5.ENSG00000128335.wgt.RDat	ENSG00000128335.APOL2	22	36622256	36636000	0.2663	rs2012928	3.15	rs8136528	0.094141	-6.19	-0.513	180	34	enet	0.13	4.4e-13	-1.37693	0.169
NA	./WEIGHTS//train_weights/Q14183.ENSG00000149927.wgt.RDat	ENSG00000149927.DOC2A	16	30016830	30034591	0.0447	rs8061772	2.96	rs11642612	0.0338	4.56	-1.948	74	74	blup	0.038	9.1e-05	-1.37242	0.17
NA	./WEIGHTS//train_weights/A6NDG6.ENSG00000184207.wgt.RDat	ENSG00000184207.PGP	16	2261998	2264808	0.0414	rs30991	2.32	rs26848	0.0364	3.98	-1.369	56	1	top1	0.036	0.00012	-1.369	0.171
NA	./WEIGHTS//train_weights/Q99952.ENSG00000072135.wgt.RDat	ENSG00000072135.PTPN18	2	131113580	131132982	0.1356	rs10928967	2.281	rs6713511	0.046015	-4.05	0.237	35	35	bslmm	0.059	0.00014	-1.3701	0.171
NA	./WEIGHTS//train_weights/Q9HAD4.ENSG00000164253.wgt.RDat	ENSG00000164253.WDR41	5	76721795	76916436	0.031	rs459366	-2.59	rs4273585	0.045721	-4.45	-1.368	157	1	top1	0.046	1.7e-05	1.368	0.17131
NA	./WEIGHTS//train_weights/Q6Y288.ENSG00000187676.wgt.RDat	ENSG00000187676.B3GALTL	13	31774073	31906413	0.2385	rs1555726	-2.1	rs7986755	0.162902	8.83	-0.446	177	20	enet	0.29	4.7e-29	-1.363	0.1729
NA	./WEIGHTS//train_weights/Q7Z6M4.ENSG00000122085.wgt.RDat	ENSG00000122085.MTERFD2	2	242011584	242041747	0.0988	rs4417705	-2.146	rs2108485	0.121754	-6.25	1.363	116	1	top1	0.12	6.4e-10	-1.363	0.173
NA	./WEIGHTS//train_weights/P43155.ENSG00000095321.wgt.RDat	ENSG00000095321.CRAT	9	131857089	131873468	0.0233	rs2287363	-1.726	rs7849270	0.002652	-3.42	-1.024	65	65	blup	0.024	0.0014	1.3612	0.17346
NA	./WEIGHTS//train_weights/Q9BTV5.ENSG00000105255.wgt.RDat	ENSG00000105255.FSD1	19	4304597	4323840	0.0558	rs10419363	-2	rs8111858	0.007181	3.44	-0.545	82	82	bslmm	0.021	0.003	-1.3596	0.1739
NA	./WEIGHTS//train_weights/P83876.ENSG00000141759.wgt.RDat	ENSG00000141759.TXNL4A	18	77732867	77793949	0.0312	rs2298643	-2.17	rs4799116	0.0264	3.93	1.601	109	4	lasso	0.028	0.00099	1.358	0.17454
NA	./WEIGHTS//train_weights/Q16769.ENSG00000115828.wgt.RDat	ENSG00000115828.QPCT	2	37571717	37600465	0.0969	rs4670713	2.756	rs10179447	0.077495	5.33	1.351	121	1	top1	0.077	1.9e-07	1.351	0.177
NA	./WEIGHTS//train_weights/O75347.ENSG00000171530.wgt.RDat	ENSG00000171530.TBCA	5	76986991	77164604	0.0654	rs2028596	2.07	rs13185613	0.02141	-4.19	-1.129	139	10	enet	0.048	9.9e-06	1.3487	0.17745
NA	./WEIGHTS//train_weights/Q96I15.ENSG00000132330.wgt.RDat	ENSG00000132330.SCLY	2	238969530	239008054	0.2857	rs6746771	2.259	rs1128552	0.303159	10.87	-1.437	148	22	enet	0.38	1e-40	-1.3483	0.178
NA	./WEIGHTS//train_weights/Q99797.ENSG00000027001.wgt.RDat	ENSG00000027001.MIPEP	13	24304328	24463558	0.1788	rs943061	-1.99	rs11551114	0.20111	-9.61	1.346	232	1	top1	0.2	3.2e-20	-1.346	0.1783
NA	./WEIGHTS//train_weights/O75886.ENSG00000115145.wgt.RDat	ENSG00000115145.STAM2	2	152973315	153032506	0.0471	rs17326195	-2.093	rs4664089	0.054858	-5.17	1.343	82	1	top1	0.055	2.6e-06	-1.343	0.179
NA	./WEIGHTS//train_weights/Q5HYK3.ENSG00000110871.wgt.RDat	ENSG00000110871.COQ5	12	120941077	120972237	0.0863	rs7973823	-1.64	rs10774555	0.086319	6.01	-1.342	88	1	top1	0.086	3.8e-09	-1.342	0.18
NA	./WEIGHTS//train_weights/Q6UXH1.ENSG00000184164.wgt.RDat	ENSG00000184164.CRELD2	22	50311815	50321188	0.1061	rs17001403	1.83	rs7410773	0.047644	-4.65	0.983	46	46	bslmm	0.057	4e-06	-1.34173	0.18
NA	./WEIGHTS//train_weights/P30101.ENSG00000167004.wgt.RDat	ENSG00000167004.PDIA3	15	44038590	44065477	0.0404	rs8040336	-1.95	rs12443084	0.03177	-3.81	-1.336	49	1	top1	0.032	0.0003	1.336	0.18155
NA	./WEIGHTS//train_weights/Q17R89.ENSG00000006740.wgt.RDat	ENSG00000006740.ARHGAP44	17	12692856	12894960	0.0825	rs3213689	2.78	rs9904572	0.00413	3.67	-1.24	214	214	blup	0.033	0.00024	-1.33046	0.183
NA	./WEIGHTS//train_weights/Q9UHG3.ENSG00000116005.wgt.RDat	ENSG00000116005.PCYOX1	2	70484518	70508323	0.0614	rs4852500	3.615	rs2706762	0.052368	-5.04	-1.333	86	1	top1	0.052	4.4e-06	1.333	0.183
NA	./WEIGHTS//train_weights/Q8IWZ8.ENSG00000105705.wgt.RDat	ENSG00000105705.SUGP1	19	19386827	19431653	0.0651	rs17751021	-2.45	rs1064395	0.072398	4.99	1.539	83	11	enet	0.085	7e-08	1.3305	0.1833
NA	./WEIGHTS//train_weights/Q9Y4P8.ENSG00000157954.wgt.RDat	ENSG00000157954.WIPI2	7	5229819	5273457	0.0599	rs4236378	-2.46	rs6463311	-0.002272	3.38	-0.39	68	12	enet	0.026	0.001	-1.329	0.184
NA	./WEIGHTS//train_weights/O00519.ENSG00000117480.wgt.RDat	ENSG00000117480.FAAH	1	46859937	46879520	0.1311	rs324418	1.94	rs324420	0.062059	-6.09	1.38	80	11	enet	0.11	7.2e-11	-1.3248	0.185
NA	./WEIGHTS//train_weights/Q8TDZ2.ENSG00000135596.wgt.RDat	ENSG00000135596.MICAL1	6	109765265	109787171	0.1663	rs13437492	2.28	rs3757237	0.06921	5.48	2.068	77	4	lasso	0.13	9.4e-13	1.3226	0.186
NA	./WEIGHTS//train_weights/Q96RL7.ENSG00000197969.wgt.RDat	ENSG00000197969.VPS13A	9	79792269	80036457	0.0853	rs636562	3.32	rs17063627	0.009451	-3.56	0.903	189	189	blup	0.031	0.00036	1.3217	0.18627
NA	./WEIGHTS//train_weights/P27694.ENSG00000132383.wgt.RDat	ENSG00000132383.RPA1	17	1732996	1803376	0.0423	rs7501623	2.54	rs7216701	0.0162	4.31	-0.866	137	137	bslmm	0.026	0.00092	-1.31564	0.188
NA	./WEIGHTS//train_weights/O60266.ENSG00000138031.wgt.RDat	ENSG00000138031.ADCY3	2	25042038	25142708	0.0379	rs955855	1.995	rs1172294	0.008526	-3.52	1.245	121	121	blup	0.016	0.0094	-1.3179	0.188
NA	./WEIGHTS//train_weights/P0DPI2.ENSG00000160221.wgt.RDat	ENSG00000160221.C21orf33	21	45553487	45565605	0.1319	rs9977816	2.62	rs2277806	0.102008	6.64	0.453	97	21	enet	0.12	1.9e-12	1.312	0.1896
NA	./WEIGHTS//train_weights/Q9BYD6.ENSG00000169288.wgt.RDat	ENSG00000169288.MRPL1	4	78783674	78873944	0.0392	rs1546318	-2.5	rs17409255	0.03545	-4.09	-1.306	109	1	top1	0.035	0.00014	1.306	0.192
NA	./WEIGHTS//train_weights/Q8NDY3.ENSG00000153531.wgt.RDat	ENSG00000153531.ADPRHL1	13	114076260	114107839	0.1491	rs9549785	-3.05	rs8001806	0.026157	4.58	1.271	121	4	lasso	0.072	7.3e-08	1.302	0.1929
NA	./WEIGHTS//train_weights/Q5JPH6.ENSG00000103356.wgt.RDat	ENSG00000103356.EARS2	16	23533335	23569052	0.1375	rs120963	1.97	rs4967958	0.257	-10.1	1.413	95	20	enet	0.26	3.2e-26	-1.30132	0.193
NA	./WEIGHTS//train_weights/P16083.ENSG00000124588.wgt.RDat	ENSG00000124588.NQO2	6	2988221	3019996	0.4481	rs9378352	-2.67	rs17300141	0.25891	10.05	0.517	125	5	lasso	0.3	1.3e-30	1.3021	0.193
NA	./WEIGHTS//train_weights/O14617.ENSG00000065000.wgt.RDat	ENSG00000065000.AP3D1	19	2100988	2164464	0.0502	rs2286364	-1.92	rs2072304	0.027795	-4.07	-1.299	72	1	top1	0.028	0.00069	1.299	0.1939
NA	./WEIGHTS//train_weights/Q4G176.ENSG00000176715.wgt.RDat	ENSG00000176715.ACSF3	16	89154783	89222254	0.3257	rs12599862	2.21	rs4785602	0.0123	4.93	-0.228	77	33	enet	0.15	2.1e-15	-1.29763	0.194
NA	./WEIGHTS//train_weights/O75439.ENSG00000105819.wgt.RDat	ENSG00000105819.PMPCB	7	102937869	102969958	0.062	rs12535070	3.42	rs17680523	0.033008	-3.93	0.026	26	17	enet	0.036	0.00012	1.2983	0.194
NA	./WEIGHTS//train_weights/A4D126.ENSG00000214960.wgt.RDat	ENSG00000214960.ISPD	7	16130817	16460947	0.092	rs6461247	1.99	rs10487914	0.010234	-4.08	-0.702	273	273	bslmm	0.048	9.9e-06	1.2915	0.197
NA	./WEIGHTS//train_weights/Q9HA65.ENSG00000104946.wgt.RDat	ENSG00000104946.TBC1D17	19	50380682	50392005	0.0378	rs4802622	3.17	rs10423897	0.023025	3.86	1.747	88	88	blup	0.024	0.0014	1.2887	0.1975
NA	./WEIGHTS//train_weights/Q8N335.ENSG00000152642.wgt.RDat	ENSG00000152642.GPD1L	3	32147181	32210205	0.1527	rs6550108	2.65	rs6784980	0.13335	7.29	1.282	120	1	top1	0.13	1.6e-13	1.282	0.19984
NA	./WEIGHTS//train_weights/P23921.ENSG00000167325.wgt.RDat	ENSG00000167325.RRM1	11	4115937	4160106	0.0286	rs1662172	-1.79	rs1372804	0.00561	-3.61	0.523	96	96	blup	0.012	0.017	-1.26637	0.20538
NA	./WEIGHTS//train_weights/Q9BYC5.ENSG00000033170.wgt.RDat	ENSG00000033170.FUT8	14	65877310	66210839	0.0316	rs7494064	2.417	rs1999725	0.022438	-4.2	1.265	172	1	top1	0.022	0.0043	-1.265	0.2059
NA	./WEIGHTS//train_weights/P49915.ENSG00000163655.wgt.RDat	ENSG00000163655.GMPS	3	155588325	155661815	0.0378	rs6809229	-2.32	rs6773642	0.009681	3.78	-1.662	90	90	bslmm	0.014	0.012	-1.2633	0.20648
NA	./WEIGHTS//train_weights/Q9H2K8.ENSG00000135090.wgt.RDat	ENSG00000135090.TAOK3	12	118587606	118810750	0.0333	rs7485457	2.71	rs16948204	0.01275	-3.95	-0.954	107	107	blup	0.019	0.0039	1.2611	0.207
NA	./WEIGHTS//train_weights/Q96HS1.ENSG00000247077.wgt.RDat	ENSG00000247077.PGAM5	12	133287405	133299228	0.1201	rs5744962	-2.77	rs12818952	-0.002661	3.86	0.548	88	88	blup	0.011	0.026	1.2596	0.208
NA	./WEIGHTS//train_weights/P15144.ENSG00000166825.wgt.RDat	ENSG00000166825.ANPEP	15	90328120	90358633	0.0593	rs28625357	2.46	rs1439117	0.00324	-3.56	0.214	104	104	blup	0.023	0.0023	-1.25545	0.20932
NA	./WEIGHTS//train_weights/P30874.ENSG00000180616.wgt.RDat	ENSG00000180616.SSTR2	17	71161151	71167185	0.0894	rs10512594	-2.15	rs8081059	0.0123	3.57	-1.993	104	104	bslmm	0.037	9.5e-05	-1.25029	0.211
NA	./WEIGHTS//train_weights/Q6NUM9.ENSG00000042445.wgt.RDat	ENSG00000042445.RETSAT	2	85569211	85581743	0.09	rs6753357	-2.493	rs3923229	0.080349	-5.88	1.251	116	1	top1	0.08	1.3e-08	-1.251	0.211
NA	./WEIGHTS//train_weights/O14807.ENSG00000158186.wgt.RDat	ENSG00000158186.MRAS	3	138066539	138124375	0.0388	rs7626349	2.26	rs7626349	0.007021	-3.97	2.259	81	81	bslmm	0.027	0.00088	-1.2487	0.21176
NA	./WEIGHTS//train_weights/Q9UHI5.ENSG00000092068.wgt.RDat	ENSG00000092068.SLC7A8	14	23594504	23652883	0.1645	rs17126483	-2.41	rs3783436	0.13661	-7.35	1.244	112	1	top1	0.14	7.8e-14	-1.244	0.2135
NA	./WEIGHTS//train_weights/Q9HA77.ENSG00000134905.wgt.RDat	ENSG00000134905.CARS2	13	111293759	111365950	0.2787	rs9559849	2.55	rs7337089	0.131958	-8.25	-0.178	141	24	enet	0.22	4e-22	1.243	0.214
NA	./WEIGHTS//train_weights/P49585.ENSG00000161217.wgt.RDat	ENSG00000161217.PCYT1A	3	195941093	196014828	0.0533	rs9812036	2.16	rs884534	0.042527	-4.94	-1.555	101	4	lasso	0.046	1.6e-05	1.2413	0.21448
NA	./WEIGHTS//train_weights/O43236.ENSG00000108387.wgt.RDat	ENSG00000108387.SEPT4	17	56597611	56618179	0.1152	rs8066773	2.54	rs740605	0.0216	-3.74	-1.902	59	59	blup	0.051	6.3e-06	1.23971	0.215
NA	./WEIGHTS//train_weights/Q9H4A4.ENSG00000176393.wgt.RDat	ENSG00000176393.RNPEP	1	201951500	201975275	0.2395	rs12090635	-1.94	rs16849483	0.179003	-8.31	1.491	96	96	bslmm	0.2	1.7e-20	-1.2312	0.218
NA	./WEIGHTS//train_weights/Q9UNF0.ENSG00000100266.wgt.RDat	ENSG00000100266.PACSIN2	22	43231418	43411151	0.1045	rs2024645	2.82	rs17415203	0.031901	5.57	-0.633	163	18	enet	0.087	3.3e-09	1.23086	0.218
NA	./WEIGHTS//train_weights/Q6PI48.ENSG00000117593.wgt.RDat	ENSG00000117593.DARS2	1	173793641	173827684	0.2167	rs5878	-1.34	rs2273366	0.223932	-9.43	-1.225	59	1	top1	0.22	1.3e-22	1.225	0.221
NA	./WEIGHTS//train_weights/Q86YJ6.ENSG00000144115.wgt.RDat	ENSG00000144115.THNSL2	2	88469835	88486146	0.398	rs17350803	-2.819	rs10865489	0.365669	-10.12	0.647	126	13	enet	0.39	8.5e-31	-1.2229	0.221
NA	./WEIGHTS//train_weights/Q9H2G2.ENSG00000065613.wgt.RDat	ENSG00000065613.SLK	10	105726959	105788991	0.0699	rs4917404	3.18	rs9325510	0.026253	-4.07	-0.176	113	113	bslmm	0.037	9.7e-05	-1.22222	0.221626
NA	./WEIGHTS//train_weights/O00233.ENSG00000110801.wgt.RDat	ENSG00000110801.PSMD9	12	122326637	122356203	0.1108	rs7961894	1.87	rs1169081	0.089709	-6.52	-1.221	89	1	top1	0.09	1.9e-09	1.221	0.222
NA	./WEIGHTS//train_weights/Q9Y2C4.ENSG00000157036.wgt.RDat	ENSG00000157036.EXOG	3	38537618	38583652	0.0403	rs9311191	1.87	rs2186457	0.003375	3.24	0.677	126	126	blup	0.0093	0.034	1.221	0.22208
NA	./WEIGHTS//train_weights/Q92734.ENSG00000114354.wgt.RDat	ENSG00000114354.TFG	3	100428205	100467810	0.0549	rs905604	-3.86	rs4928081	0.086168	-5.81	-1.221	101	1	top1	0.086	3.9e-09	1.221	0.22209
NA	./WEIGHTS//train_weights/A7MBM2.ENSG00000140323.wgt.RDat	ENSG00000140323.DISP2	15	40650436	40663257	0.0741	rs603104	2.1	rs16970633	0.08144	5.85	1.219	99	1	top1	0.081	2.8e-07	1.219	0.22284
NA	./WEIGHTS//train_weights/Q9BTY7.ENSG00000235173.wgt.RDat	ENSG00000235173.FAM203A	8	145192672	145195746	0.0296	rs4977203	1.29	rs7828303	0.034321	3.31	-1.219	9	1	top1	0.034	0.0016	-1.219	0.222844
NA	./WEIGHTS//train_weights/Q8N5X7.ENSG00000163412.wgt.RDat	ENSG00000163412.EIF4E3	3	71724567	71803924	0.1658	rs6770667	-2.39	rs2029013	0.022795	-4.52	1.601	122	122	blup	0.057	5.5e-06	-1.217	0.22359
NA	./WEIGHTS//train_weights/Q58WW2.ENSG00000143164.wgt.RDat	ENSG00000143164.DCAF6	1	167905021	168045081	0.1255	rs4657739	-2.58	rs11558511	0.055708	-5.73	0.947	108	3	lasso	0.064	5.2e-07	-1.2097	0.226
NA	./WEIGHTS//train_weights/O75746.ENSG00000115840.wgt.RDat	ENSG00000115840.SLC25A12	2	172640880	172864766	0.0587	rs17614941	1.916	rs6738445	0.058307	5.57	1.484	93	93	blup	0.062	6.2e-07	1.2111	0.226
NA	./WEIGHTS//train_weights/Q13114.ENSG00000131323.wgt.RDat	ENSG00000131323.TRAF3	14	103243813	103377837	0.1043	rs10138062	-3.079	rs3803286	0.050616	4.95	-1.215	102	102	bslmm	0.053	3.6e-06	-1.2104	0.2261
NA	./WEIGHTS//train_weights/Q8N128.ENSG00000151327.wgt.RDat	ENSG00000151327.FAM177A1	14	35514113	35582336	0.0443	rs4981263	2.252	rs17456102	0.006901	-3.67	-1.236	92	92	blup	0.031	0.00039	1.2092	0.2266
NA	./WEIGHTS//train_weights/Q96BS2.ENSG00000088992.wgt.RDat	ENSG00000088992.TESC	12	117476728	117537284	0.0605	rs7297446	2.06	rs2270794	0.046611	-5.74	1.331	103	103	blup	0.065	3.5e-07	-1.2088	0.227
NA	./WEIGHTS//train_weights/Q969G6.ENSG00000135002.wgt.RDat	ENSG00000135002.RFK	9	79000433	79009433	0.0859	rs11144905	2.083	rs10116800	0.042171	-4.43	1.208	122	1	top1	0.042	5e-05	-1.208	0.22705
NA	./WEIGHTS//train_weights/P62942.ENSG00000088832.wgt.RDat	ENSG00000088832.FKBP1A	20	1349622	1373806	0.0773	rs1884389	-3.2	rs6109434	-0.001447	-3.91	1.429	161	161	bslmm	0.023	0.0019	-1.202	0.2293
NA	./WEIGHTS//train_weights/Q9UKS6.ENSG00000165912.wgt.RDat	ENSG00000165912.PACSIN3	11	47199076	47207994	0.072	rs326217	1.54	rs1352307	0.036953	4.56	-1.341	83	83	bslmm	0.052	6.4e-06	-1.19889	0.23057
NA	./WEIGHTS//train_weights/Q9Y6F6.ENSG00000072952.wgt.RDat	ENSG00000072952.MRVI1	11	10594638	10715535	0.095	rs7948666	4.13	rs753002	0.013666	-5.36	-0.905	211	211	bslmm	0.049	8.1e-06	1.19878	0.23062
NA	./WEIGHTS//train_weights/Q14112.ENSG00000087303.wgt.RDat	ENSG00000087303.NID2	14	52471521	52535712	0.0874	rs2357313	-2.286	rs2516585	0.017729	-4.62	0.211	182	182	blup	0.058	1.3e-06	-1.1967	0.2314
NA	./WEIGHTS//train_weights/O43615.ENSG00000104980.wgt.RDat	ENSG00000104980.TIMM44	19	7991603	8008805	0.2313	rs11542187	-1.41	rs11542187	0.09614	-6.13	-1.406	72	14	enet	0.11	2e-11	1.189	0.2345
NA	./WEIGHTS//train_weights/Q16658.ENSG00000075618.wgt.RDat	ENSG00000075618.FSCN1	7	5632439	5646286	0.038	rs2908426	-2.6	rs4320462	0.009618	3.45	-1.938	76	76	bslmm	0.013	0.015	-1.1842	0.236
NA	./WEIGHTS//train_weights/O95749.ENSG00000152904.wgt.RDat	ENSG00000152904.GGPS1	1	235490665	235507847	0.0297	rs6429082	-2.25	rs12035746	0.044409	4.42	1.183	52	1	top1	0.044	2.3e-05	1.183	0.237
NA	./WEIGHTS//train_weights/Q9BSD7.ENSG00000135778.wgt.RDat	ENSG00000135778.NTPCR	1	233086351	233119628	0.6389	rs2224402	-2.85	rs12410594	0.584672	-14.84	0.561	128	21	enet	0.59	1.1e-74	-1.1799	0.238
NA	./WEIGHTS//train_weights/Q9HA64.ENSG00000141560.wgt.RDat	ENSG00000141560.FN3KRP	17	80674559	80688204	0.3746	rs868203	-2.48	rs3859206	0.29	10.52	1.458	73	73	bslmm	0.34	1.5e-35	1.17945	0.238
NA	./WEIGHTS//train_weights/O76054.ENSG00000100003.wgt.RDat	ENSG00000100003.SEC14L2	22	30792846	30821305	0.0939	rs3804078	3.07	rs5753103	0.01412	-3.98	-0.756	130	130	bslmm	0.046	1.7e-05	-1.1788	0.238
NA	./WEIGHTS//train_weights/Q8N5K1.ENSG00000145354.wgt.RDat	ENSG00000145354.CISD2	4	103790135	103810399	0.0707	rs223469	2.7	rs223452	0.09964	-6.51	-1.179	43	1	top1	0.1	2.3e-10	1.179	0.238
NA	./WEIGHTS//train_weights/Q12959.ENSG00000075711.wgt.RDat	ENSG00000075711.DLG1	3	196769431	197026171	0.1955	rs6583202	3.62	rs9880331	0.034538	5.13	-0.335	209	209	bslmm	0.14	8.9e-14	-1.1772	0.2391
NA	./WEIGHTS//train_weights/P27105.ENSG00000148175.wgt.RDat	ENSG00000148175.STOM	9	124101355	124132531	0.2052	rs306794	2.903	rs306781	0.004168	-3.39	0.424	91	18	enet	0.022	0.0021	-1.1746	0.24016
NA	./WEIGHTS//train_weights/Q9UBT2.ENSG00000126261.wgt.RDat	ENSG00000126261.UBA2	19	34919257	34960853	0.0299	rs8100257	2.53	rs6510419	0.024605	3.83	1.802	88	2	lasso	0.027	0.00076	1.1726	0.2409
NA	./WEIGHTS//train_weights/Q9NPH0.ENSG00000162836.wgt.RDat	ENSG00000162836.ACP6	1	147101453	147142618	0.4343	rs2353	2.94	rs6674938	0.393248	-9.86	-1.172	123	1	top1	0.39	2.7e-28	1.172	0.241
NA	./WEIGHTS//train_weights/Q6ZVK8.ENSG00000173566.wgt.RDat	ENSG00000173566.NUDT18	8	21964383	21966932	0.0469	rs4872320	-2.89	rs4872276	-0.002766	3.29	0.316	88	88	blup	0.0077	0.052	1.1708	0.241698
NA	./WEIGHTS//train_weights/Q9BVK2.ENSG00000159063.wgt.RDat	ENSG00000159063.ALG8	11	77811982	77850706	0.1288	rs11237353	-2.88	rs563453	0.003954	-3.94	1.261	114	13	enet	0.059	0.0002	-1.17075	0.2417
NA	./WEIGHTS//train_weights/Q96EX1.ENSG00000163866.wgt.RDat	ENSG00000163866.SMIM12	1	35178338	35325417	0.1152	rs592345	-1.79	rs659619	0.043117	-4.75	-1.432	79	79	bslmm	0.097	4.1e-10	1.171	0.242
NA	./WEIGHTS//train_weights/Q9HBI6.ENSG00000171903.wgt.RDat	ENSG00000171903.CYP4F11	19	16023177	16045677	0.0721	rs7257306	-2.62	rs1060463	0.017924	-4.18	-0.664	113	113	blup	0.04	0.00013	1.1693	0.2423
NA	./WEIGHTS//train_weights/O94812.ENSG00000007516.wgt.RDat	ENSG00000007516.BAIAP3	16	1383602	1399439	0.2246	rs1132356	-2.1	rs4984814	0.0907	6.71	-1.015	71	5	lasso	0.11	1.8e-11	-1.16566	0.244
NA	./WEIGHTS//train_weights/Q6IAN0.ENSG00000109016.wgt.RDat	ENSG00000109016.DHRS7B	17	21026677	21096578	0.0476	rs4985969	2.95	rs735091	0.0275	4.57	0.944	84	84	blup	0.039	7.3e-05	1.16529	0.244
NA	./WEIGHTS//train_weights/P15374.ENSG00000118939.wgt.RDat	ENSG00000118939.UCHL3	13	76123619	76180085	0.1684	rs9600526	-1.79	rs7982613	0.159693	8	-1.163	112	1	top1	0.16	4.5e-16	-1.163	0.2448
NA	./WEIGHTS//train_weights/Q9Y2Z9.ENSG00000119723.wgt.RDat	ENSG00000119723.COQ6	14	74416629	74430373	0.0781	rs6574158	-2.033	rs11159052	0.083465	6.09	1.162	96	1	top1	0.083	6.9e-09	1.162	0.2452
NA	./WEIGHTS//train_weights/O75828.ENSG00000159231.wgt.RDat	ENSG00000159231.CBR3	21	37507210	37518864	0.3238	rs12627688	2.58	rs879894	0.407786	-12.47	1.17	122	12	enet	0.43	3.2e-48	-1.162	0.2454
NA	./WEIGHTS//train_weights/Q9BVV7.ENSG00000075336.wgt.RDat	ENSG00000075336.TIMM21	18	71815746	71826197	0.1508	rs7228143	2.49	rs12956301	0.0779	6.99	-1.24	109	16	enet	0.13	5.8e-13	-1.16	0.24595
NA	./WEIGHTS//train_weights/Q9UK08.ENSG00000167414.wgt.RDat	ENSG00000167414.GNG8	19	47137333	47137942	0.3162	rs7253955	-2.36	rs3760759	0.082972	-5.45	-1.157	85	85	bslmm	0.17	4.6e-15	1.1569	0.2473
NA	./WEIGHTS//train_weights/Q96TC7.ENSG00000137824.wgt.RDat	ENSG00000137824.RMDN3	15	41028082	41048049	0.1785	rs11558807	-1.75	rs1142468	0.0848	-7.21	-0.813	53	9	enet	0.18	8.6e-18	1.15666	0.24741
NA	./WEIGHTS//train_weights/Q53GQ0.ENSG00000149084.wgt.RDat	ENSG00000149084.HSD17B12	11	43577986	43878167	0.2169	rs12418783	3.58	rs1061810	0.155474	-8.14	-1.099	164	13	lasso	0.24	2e-24	1.15642	0.24751
NA	./WEIGHTS//train_weights/P48426.ENSG00000150867.wgt.RDat	ENSG00000150867.PIP4K2A	10	22823778	23003484	0.2101	rs16922592	3.27	rs10828316	0.221078	-9.21	0.397	144	3	lasso	0.23	7.1e-23	-1.15327	0.2488
NA	./WEIGHTS//train_weights/P00505.ENSG00000125166.wgt.RDat	ENSG00000125166.GOT2	16	58741035	58768261	0.108	rs30823	2.3	rs12599931	0.106	7.08	-1.607	109	109	blup	0.13	1.8e-13	-1.1498	0.25
NA	./WEIGHTS//train_weights/Q8WVM0.ENSG00000029639.wgt.RDat	ENSG00000029639.TFB1M	6	155578643	155635627	0.0899	rs17812836	-2.49	rs1334687	0.039054	4.49	0.729	160	160	blup	0.045	0.00011	1.15	0.25
NA	./WEIGHTS//train_weights/Q8IUC4.ENSG00000131941.wgt.RDat	ENSG00000131941.RHPN2	19	33469499	33555794	0.0622	rs10403940	3.17	rs1981818	0.081261	-5	1.147	103	1	top1	0.081	2.8e-06	-1.147	0.2514
NA	./WEIGHTS//train_weights/P55285.ENSG00000113361.wgt.RDat	ENSG00000113361.CDH6	5	31193857	31329253	0.1725	rs7734842	-3.26	rs7723322	0.066991	-5.3	1.638	234	9	lasso	0.085	7.1e-09	-1.1469	0.25143
NA	./WEIGHTS//train_weights/Q9BS40.ENSG00000079257.wgt.RDat	ENSG00000079257.LXN	3	158363611	158390482	0.1295	rs4679834	1.6	rs3867391	0.18621	8.34	-1.05	90	12	lasso	0.21	7.7e-20	-1.1466	0.25153
NA	./WEIGHTS//train_weights/Q9NRV9.ENSG00000013583.wgt.RDat	ENSG00000013583.HEBP1	12	13127798	13153207	0.5145	rs1486326	2.32	rs4763913	0.363391	-12.43	-1.21	118	118	bslmm	0.38	6.2e-41	1.1464	0.252
NA	./WEIGHTS//train_weights/Q9NXG2.ENSG00000066654.wgt.RDat	ENSG00000066654.THUMPD1	16	20744986	20753406	0.0245	rs17688192	2.12	rs8044864	0.0342	-4.18	1.145	72	1	top1	0.034	0.00018	-1.145	0.252
NA	./WEIGHTS//train_weights/O43488.ENSG00000053371.wgt.RDat	ENSG00000053371.AKR7A2	1	19630459	19638640	0.1329	rs3828102	-2.19	rs1063986	0.064066	-5.48	-1.143	124	1	top1	0.064	5.2e-07	1.143	0.253
NA	./WEIGHTS//train_weights/P08758.ENSG00000164111.wgt.RDat	ENSG00000164111.ANXA5	4	122589110	122618268	0.2108	rs17449954	-3.28	rs13145977	0.24681	-10.06	-0.916	124	5	lasso	0.25	1.1e-25	1.1431	0.253
NA	./WEIGHTS//train_weights/Q9GZY4.ENSG00000106603.wgt.RDat	ENSG00000106603.COA1	7	43648055	43769316	0.0693	rs17172240	-2.03	rs1181592	0.008372	-3.94	1.689	106	106	blup	0.046	2e-05	-1.1441	0.253
NA	./WEIGHTS//train_weights/O00400.ENSG00000169359.wgt.RDat	ENSG00000169359.SLC33A1	3	155538813	155572218	0.0511	rs6809229	-2.32	rs11921267	0.068951	-5.23	-1.141	73	1	top1	0.069	4.3e-07	1.141	0.25387
NA	./WEIGHTS//train_weights/Q9Y600.ENSG00000139631.wgt.RDat	ENSG00000139631.CSAD	12	53551447	53575135	0.0387	rs12368757	3.27	rs822682	0.014907	-4.38	-0.098	85	85	bslmm	0.023	0.0038	1.1407	0.254
NA	./WEIGHTS//train_weights/Q8TB37.ENSG00000151413.wgt.RDat	ENSG00000151413.NUBPL	14	31959162	32330430	0.1292	rs10132674	3.546	rs10131543	0.005164	-4.09	-0.289	188	188	blup	0.05	9e-06	-1.1387	0.2548
NA	./WEIGHTS//train_weights/Q9NP78.ENSG00000150967.wgt.RDat	ENSG00000150967.ABCB9	12	123405498	123466196	0.0532	rs585522	-2.23	rs11060942	0.051611	4.64	-0.525	50	2	lasso	0.056	2.3e-06	-1.1383	0.255
NA	./WEIGHTS//train_weights/Q7Z6G3.ENSG00000103154.wgt.RDat	ENSG00000103154.NECAB2	16	84002237	84036381	0.1033	rs4782873	2.6	rs7342695	0.0576	-5.59	1.138	175	1	top1	0.058	1.5e-06	-1.138	0.255
NA	./WEIGHTS//train_weights/Q53RD9.ENSG00000144152.wgt.RDat	ENSG00000144152.FBLN7	2	112895962	112945791	0.0818	rs12474447	-2.401	rs11123128	0.02297	-4.38	0.384	104	104	blup	0.065	1.3e-06	-1.1317	0.258
NA	./WEIGHTS//train_weights/Q5T440.ENSG00000181873.wgt.RDat	ENSG00000181873.IBA57	1	228353516	228369958	0.037	rs12564763	-1.58	rs3795782	0.034616	-4.54	-1.426	68	68	blup	0.045	2.4e-05	1.1267	0.26
NA	./WEIGHTS//train_weights/Q13976.ENSG00000185532.wgt.RDat	ENSG00000185532.PRKG1	10	52750945	54058110	0.1934	rs2339624	4.06	rs7905063	0.12472	7.1	-0.791	816	19	enet	0.13	2.6e-13	-1.12588	0.260217
NA	./WEIGHTS//train_weights/Q86TN4.ENSG00000149743.wgt.RDat	ENSG00000149743.TRPT1	11	63991271	63993726	0.0889	rs4672	-1.64	rs28395880	-0.002738	3.58	-1.146	68	68	blup	0.026	0.006	-1.12522	0.26049
NA	./WEIGHTS//train_weights/Q9NUM4.ENSG00000106460.wgt.RDat	ENSG00000106460.TMEM106B	7	12250867	12282993	0.0893	rs10264702	-2.88	rs6945902	0.071641	5.49	1.141	139	12	enet	0.086	3.9e-09	1.1247	0.261
NA	./WEIGHTS//train_weights/Q9HCG7.ENSG00000070610.wgt.RDat	ENSG00000070610.GBA2	9	35736863	35749983	0.1846	rs2145925	-2.493	rs3750434	0.208541	-8.94	1.119	104	1	top1	0.21	5.5e-21	-1.119	0.26314
NA	./WEIGHTS//train_weights/Q8NCG7.ENSG00000164535.wgt.RDat	ENSG00000164535.DAGLB	7	6448757	6523821	0.112	rs2241445	3.6	rs836547	-0.002468	-3.07	-0.074	98	98	blup	0.032	0.00029	1.1156	0.265
NA	./WEIGHTS//train_weights/Q96T76.ENSG00000155229.wgt.RDat	ENSG00000155229.MMS19	10	99218081	99258551	0.0681	rs11599228	2.57	rs10882950	0.029537	4.32	-1.377	106	10	enet	0.032	0.00027	-1.11265	0.265859
NA	./WEIGHTS//train_weights/Q92620.ENSG00000140829.wgt.RDat	ENSG00000140829.DHX38	16	72127461	72146811	0.0478	rs17604676	-3.87	rs3764310	-0.0018	-3.99	2.291	115	115	blup	0.035	0.0017	-1.11305	0.266
NA	./WEIGHTS//train_weights/P22033.ENSG00000146085.wgt.RDat	ENSG00000146085.MUT	6	49398073	49430904	0.0921	rs7453050	2.38	rs2501976	0.103857	-6.42	1.329	84	6	lasso	0.11	2.7e-11	-1.1123	0.266
NA	./WEIGHTS//train_weights/Q9BY43.ENSG00000254505.wgt.RDat	ENSG00000254505.CHMP4A	14	24678789	24683075	0.0613	rs7155723	1.715	rs6573607	-0.000582	3.78	0.172	96	96	blup	0.024	0.0017	1.111	0.2666
NA	./WEIGHTS//train_weights/O14910.ENSG00000111052.wgt.RDat	ENSG00000111052.LIN7A	12	81186299	81331704	0.0918	rs11114683	-2.28	rs7977901	0.073588	-5.71	-1.109	150	1	top1	0.074	5.5e-08	1.109	0.267
NA	./WEIGHTS//train_weights/P04179.ENSG00000112096.wgt.RDat	ENSG00000112096.SOD2	6	160090089	160183561	0.0988	rs12204454	-2.02	rs9365085	0.096947	6.67	-1.107	103	1	top1	0.097	4.1e-10	-1.107	0.268
NA	./WEIGHTS//train_weights/Q6DN14.ENSG00000175471.wgt.RDat	ENSG00000175471.MCTP1	5	94039446	94620279	0.0547	rs10059576	-2.28	rs2112450	0.078917	-5.78	1.106	215	1	top1	0.079	1.8e-08	-1.106	0.26873
NA	./WEIGHTS//train_weights/Q969R2.ENSG00000184792.wgt.RDat	ENSG00000184792.OSBP2	22	31089769	31303811	0.0597	rs4820876	-2.12	rs3804085	0.000637	-3.11	-0.184	160	160	blup	0.017	0.006	1.10449	0.269
NA	./WEIGHTS//train_weights/Q6ZNB6.ENSG00000170448.wgt.RDat	ENSG00000170448.NFXL1	4	47849257	47916653	0.1526	rs2033897	1.19	rs6823698	0.13126	-7.22	-1.093	79	9	lasso	0.14	1e-13	1.1047	0.269
NA	./WEIGHTS//train_weights/P21589.ENSG00000135318.wgt.RDat	ENSG00000135318.NT5E	6	86159809	86205500	0.1587	rs17440806	2.01	rs4373339	0.16163	7.91	0.818	96	4	lasso	0.21	2.6e-21	1.1048	0.269
NA	./WEIGHTS//train_weights/Q9BYN0.ENSG00000271303.wgt.RDat	ENSG00000271303.SRXN1	20	627259	634014	0.0826	rs6117279	2.25	rs13043781	0.032038	-4.5	-0.224	142	142	bslmm	0.045	2e-05	1.105	0.2694
NA	./WEIGHTS//train_weights/Q8TB68.ENSG00000131188.wgt.RDat	ENSG00000131188.PRR7	5	176873446	176883283	0.0474	rs6556312	2.1	rs335468	0.029444	-3.65	-1.424	58	4	lasso	0.048	0.00022	1.1038	0.26968
NA	./WEIGHTS//train_weights/O43752.ENSG00000135823.wgt.RDat	ENSG00000135823.STX6	1	180941861	180992047	0.0514	rs2331993	2.44	rs6665134	0.006148	4.03	-0.438	116	27	enet	0.038	8e-05	-1.1033	0.27
NA	./WEIGHTS//train_weights/Q7Z2Z2.ENSG00000140598.wgt.RDat	ENSG00000140598.EFTUD1	15	82422571	82555104	0.1182	rs8027661	2.81	rs2654206	0.01858	5.38	0.02	128	128	blup	0.067	2.1e-07	-1.10092	0.27093
NA	./WEIGHTS//train_weights/Q13601.ENSG00000111615.wgt.RDat	ENSG00000111615.KRR1	12	75890684	75905416	0.0791	rs28932170	2.12	rs11540407	0.003165	-3.4	1.294	91	91	bslmm	0.03	0.0047	-1.0988	0.272
NA	./WEIGHTS//train_weights/P50226.ENSG00000197165.wgt.RDat	ENSG00000197165.SULT1A2	16	28603264	28608430	0.3285	rs2411453	-2.65	rs1074631	0.148	-7.82	-1.881	51	11	lasso	0.22	1.5e-21	1.09513	0.273
NA	./WEIGHTS//train_weights/Q9ULC3.ENSG00000112210.wgt.RDat	ENSG00000112210.RAB23	6	57053607	57087078	0.0486	rs1888265	-2.7	rs9382684	0.023507	-4.11	-0.035	93	27	enet	0.047	1.3e-05	1.0965	0.273
NA	./WEIGHTS//train_weights/Q9UPU9.ENSG00000020577.wgt.RDat	ENSG00000020577.SAMD4A	14	55033815	55260033	0.3073	rs2183081	-3.709	rs17657012	0.191816	-7.09	-0.636	219	219	bslmm	0.2	3.3e-13	1.0946	0.2737
NA	./WEIGHTS//train_weights/P50336.ENSG00000143224.wgt.RDat	ENSG00000143224.PPOX	1	161136200	161147803	0.1805	rs2307426	-2.81	rs36013429	0.153105	-7.67	-0.259	115	10	enet	0.18	1.8e-18	1.0937	0.274
NA	./WEIGHTS//train_weights/O15079.ENSG00000101298.wgt.RDat	ENSG00000101298.SNPH	20	1246960	1289972	0.0687	rs4814229	-3.04	rs11905792	0.025296	-4.55	-1.615	144	144	blup	0.026	0.00092	1.093	0.2742
NA	./WEIGHTS//train_weights/Q6ZMW3.ENSG00000214595.wgt.RDat	ENSG00000214595.EML6	2	54950636	55199157	0.0594	rs2567839	-3.331	rs4625954	0.004725	-3.83	1.207	287	287	bslmm	0.012	0.017	-1.0892	0.276
NA	./WEIGHTS//train_weights/Q8NAT1.ENSG00000144647.wgt.RDat	ENSG00000144647.POMGNT2	3	43120724	43147568	0.0696	rs10510735	-2.57	rs7648947	0.062277	-5.6	0.661	96	96	bslmm	0.073	8e-08	-1.0891	0.2761
NA	./WEIGHTS//train_weights/P31939.ENSG00000138363.wgt.RDat	ENSG00000138363.ATIC	2	216176540	216214487	0.2032	rs33996776	2.332	rs16853834	0.128014	7.36	-0.512	130	14	enet	0.14	7.2e-14	-1.0869	0.277
NA	./WEIGHTS//train_weights/A7KAX9.ENSG00000134909.wgt.RDat	ENSG00000134909.ARHGAP32	11	128834955	129149219	0.027	rs7924416	1.48	rs10893942	0.031809	-3.71	1.087	198	1	top1	0.032	0.0003	-1.087	0.27704
NA	./WEIGHTS//train_weights/Q96RQ3.ENSG00000078070.wgt.RDat	ENSG00000078070.MCCC1	3	182733006	182833863	0.2053	rs10513789	-7.29	rs4859156	0.184	-8.5	-0.933	112	5	lasso	0.22	6.8e-22	1.0865	0.27724
NA	./WEIGHTS//train_weights/Q7Z3J2.ENSG00000103544.wgt.RDat	ENSG00000103544.C16orf62	16	19566562	19718115	0.0672	rs739565	1.76	rs11642806	0.00305	-3.29	1.084	143	143	bslmm	0.016	0.0088	-1.08488	0.278
NA	./WEIGHTS//train_weights/Q9BYV8.ENSG00000106477.wgt.RDat	ENSG00000106477.CEP41	7	130033612	130082274	0.0697	rs12672246	-2.4	rs1990790	0.034463	5.04	0.889	129	7	enet	0.056	2e-06	1.0839	0.278
NA	./WEIGHTS//train_weights/P08240.ENSG00000182934.wgt.RDat	ENSG00000182934.SRPR	11	126132814	126139039	0.0264	rs522486	2.6	rs687033	0.034684	-3.96	-1.084	134	1	top1	0.035	0.00017	1.084	0.27836
NA	./WEIGHTS//train_weights/P38117.ENSG00000105379.wgt.RDat	ENSG00000105379.ETFB	19	51848423	51869672	0.0727	rs166653	-2.31	rs3786625	0.037324	4.8	-0.959	106	5	lasso	0.045	2.1e-05	-1.0838	0.2785
NA	./WEIGHTS//train_weights/P51858.ENSG00000143321.wgt.RDat	ENSG00000143321.HDGF	1	156711899	156736717	0.0524	rs11812062	2.41	rs11264534	0.063086	-5.34	-1.081	84	1	top1	0.063	4.8e-07	1.081	0.28
NA	./WEIGHTS//train_weights/P51957.ENSG00000114904.wgt.RDat	ENSG00000114904.NEK4	3	52744800	52804965	0.0622	rs6765687	-2.78	rs3774354	0.06006	-4.98	0.358	112	112	blup	0.079	6.1e-06	-1.0791	0.28053
NA	./WEIGHTS//train_weights/Q9BZF1.ENSG00000091039.wgt.RDat	ENSG00000091039.OSBPL8	12	76745577	76953589	0.0484	rs12426026	-2.34	rs1969313	0.009973	3.45	-1.044	133	9	enet	0.02	0.0031	-1.0788	0.281
NA	./WEIGHTS//train_weights/P23368.ENSG00000082212.wgt.RDat	ENSG00000082212.ME2	18	48405419	48474691	0.0882	rs2847541	2.09	rs584087	0.00697	4.24	-1.256	101	11	enet	0.031	0.00039	-1.074	0.28299
NA	./WEIGHTS//train_weights/Q02108.ENSG00000164116.wgt.RDat	ENSG00000164116.GUCY1A3	4	156587863	156653501	0.0842	rs17033516	-2.45	rs3796582	0.00547	3.46	-0.096	134	134	bslmm	0.037	0.00011	-1.0727	0.283
NA	./WEIGHTS//train_weights/Q9H3G5.ENSG00000106066.wgt.RDat	ENSG00000106066.CPVL	7	29034847	29235067	0.2898	rs4722888	-3.37	rs245883	0.07255	6.5	0.654	283	283	blup	0.21	7.9e-18	-1.0731	0.283
NA	./WEIGHTS//train_weights/Q13011.ENSG00000104823.wgt.RDat	ENSG00000104823.ECH1	19	39306062	39322645	0.0674	rs11575003	-1.77	rs2229259	0.0865	-5.86	1.072	81	1	top1	0.087	3.7e-09	-1.072	0.2837
NA	./WEIGHTS//train_weights/Q96HC4.ENSG00000163110.wgt.RDat	ENSG00000163110.PDLIM5	4	95373037	95589377	0.0751	rs17021818	2.45	rs2452600	0.04198	-4.44	-1.072	148	1	top1	0.042	3.7e-05	1.072	0.284
NA	./WEIGHTS//train_weights/P43007.ENSG00000115902.wgt.RDat	ENSG00000115902.SLC1A4	2	65215611	65250999	0.0952	rs2723090	-2.751	rs6751300	0.082964	5.73	-1.069	102	1	top1	0.083	7.7e-09	-1.069	0.285
NA	./WEIGHTS//train_weights/P52209.ENSG00000142657.wgt.RDat	ENSG00000142657.PGD	1	10458649	10480201	0.0936	rs2297881	-3.27	rs6682868	0.021584	4.26	-0.322	99	99	blup	0.033	0.00022	1.0666	0.286
NA	./WEIGHTS//train_weights/Q9Y6M9.ENSG00000147684.wgt.RDat	ENSG00000147684.NDUFB9	8	125551344	125580751	0.1071	rs11994203	2	rs4527852	0.094637	-6.17	1.066	122	1	top1	0.095	6.6e-10	-1.066	0.286424
NA	./WEIGHTS//train_weights/A8MSI8.ENSG00000232859.wgt.RDat	ENSG00000232859.LYRM9	17	26205340	26221778	0.1469	rs9911917	2.05	rs7218395	0.262	-10.27	-1.043	75	3	lasso	0.29	2.6e-29	1.06371	0.287
NA	./WEIGHTS//train_weights/P49189.ENSG00000143149.wgt.RDat	ENSG00000143149.ALDH9A1	1	165631453	165668100	0.186	rs10918228	2.82	rs12408101	0.136274	-7.27	-1.063	126	1	top1	0.14	8.4e-14	1.063	0.288
NA	./WEIGHTS//train_weights/Q86WC4.ENSG00000081087.wgt.RDat	ENSG00000081087.OSTM1	6	108362613	108487058	0.0262	rs9486801	3.14	rs9386694	0.034369	4.1	-1.063	92	1	top1	0.034	0.00023	-1.063	0.288
NA	./WEIGHTS//train_weights/Q9BSH5.ENSG00000119431.wgt.RDat	ENSG00000119431.HDHD3	9	116135699	116139279	0.4233	rs10817488	2.071	rs1043836	0.108089	-7.3	0.737	121	29	enet	0.19	2.2e-19	-1.0625	0.28801
NA	./WEIGHTS//train_weights/Q9BRA2.ENSG00000129235.wgt.RDat	ENSG00000129235.TXNDC17	17	6544078	6547861	0.0794	rs4796547	2.92	rs2165844	0.00631	4.06	-1.066	122	122	blup	0.031	0.00038	-1.05992	0.289
NA	./WEIGHTS//train_weights/Q9NY47.ENSG00000007402.wgt.RDat	ENSG00000007402.CACNA2D2	3	50400233	50541675	0.0937	rs1076872	-2	rs2071803	0.040846	-4.45	1.06	86	1	top1	0.041	4.7e-05	-1.06	0.28914
NA	./WEIGHTS//train_weights/Q93034.ENSG00000166266.wgt.RDat	ENSG00000166266.CUL5	11	107879459	107978503	0.1002	rs6589007	2.87	rs7930340	0.033025	-4.02	1.057	94	1	top1	0.033	0.00023	-1.057	0.29051
NA	./WEIGHTS//train_weights/O95163.ENSG00000070061.wgt.RDat	ENSG00000070061.IKBKAP	9	111629797	111696396	0.0718	rs874863	3.022	rs12341419	0.009486	-4.42	-0.286	188	188	blup	0.026	0.00091	-1.0564	0.29077
NA	./WEIGHTS//train_weights/Q6P4F2.ENSG00000267673.wgt.RDat	ENSG00000267673.FDX1L	19	10416103	10426691	0.1317	rs3093030	2.91	rs12720356	0.073603	-5.55	0.822	84	84	bslmm	0.076	3.1e-08	-1.056	0.291
NA	./WEIGHTS//train_weights/P11216.ENSG00000100994.wgt.RDat	ENSG00000100994.PYGB	20	25228705	25278650	0.1949	rs3787081	-1.91	rs11699316	0.032292	-4.51	0.459	113	10	enet	0.07	1.1e-07	-1.052	0.2927
NA	./WEIGHTS//train_weights/P05186.ENSG00000162551.wgt.RDat	ENSG00000162551.ALPL	1	21835858	21904905	0.055	rs6426721	2.96	rs1780329	0.052499	-4.79	1.047	146	1	top1	0.052	4.3e-06	-1.047	0.295
NA	./WEIGHTS//train_weights/Q8N0U4.ENSG00000222011.wgt.RDat	ENSG00000222011.FAM185A	7	102389418	102449672	0.1845	rs10487279	2.86	rs10487284	0.047906	-5.81	-0.005	62	12	enet	0.14	5.8e-14	-1.0469	0.295
NA	./WEIGHTS//train_weights/Q16401.ENSG00000095261.wgt.RDat	ENSG00000095261.PSMD5	9	123577774	123605262	0.0709	rs1577001	-2.112	rs12343516	0.08803	5.98	1.047	79	1	top1	0.088	2.7e-09	1.047	0.2951
NA	./WEIGHTS//train_weights/P49959.ENSG00000020922.wgt.RDat	ENSG00000020922.MRE11A	11	94152895	94227074	0.1823	rs521349	-2.47	rs588701	0.041739	5.2	-2.066	141	141	blup	0.11	1.3e-11	-1.04353	0.2967
NA	./WEIGHTS//train_weights/Q12931.ENSG00000126602.wgt.RDat	ENSG00000126602.TRAP1	16	3701640	3767598	0.1971	rs38025	2.09	rs2791	0.0994	-7.91	1.135	62	23	enet	0.19	6.9e-19	-1.04214	0.297
NA	./WEIGHTS//train_weights/Q14254.ENSG00000132589.wgt.RDat	ENSG00000132589.FLOT2	17	27206353	27224697	0.3125	rs4349196	-1.06	rs6505095	0.145	-7.45	-1.043	68	1	top1	0.15	1.2e-14	1.043	0.297
NA	./WEIGHTS//train_weights/A4D1E9.ENSG00000105793.wgt.RDat	ENSG00000105793.GTPBP10	7	89964537	90020769	0.2396	rs6966057	-3.03	rs42659	0.215268	9.19	1.159	104	8	lasso	0.27	3e-25	1.0401	0.298
NA	./WEIGHTS//train_weights/P42126.ENSG00000167969.wgt.RDat	ENSG00000167969.ECI1	16	2289396	2302301	0.3672	rs30991	2.32	rs11645942	0.329	-11.16	0.848	60	3	lasso	0.33	1.1e-34	-1.03628	0.3
NA	./WEIGHTS//train_weights/Q8TAG5.ENSG00000170419.wgt.RDat	ENSG00000170419.VSTM2A	7	54610018	54638773	0.0462	rs480777	1.46	rs1454520	0.011986	-3.76	0.36	135	135	blup	0.022	0.0022	1.0354	0.3
NA	./WEIGHTS//train_weights/P01210.ENSG00000181195.wgt.RDat	ENSG00000181195.PENK	8	57349233	57359293	0.0535	rs13258881	1.45	rs7838170	0.038036	3.82	-1.036	87	1	top1	0.038	0.00045	-1.036	0.300202
NA	./WEIGHTS//train_weights/Q9P121.ENSG00000182667.wgt.RDat	ENSG00000182667.NTM	11	131240373	132206716	0.1117	rs1939380	-3.91	rs318977	0.057338	-5.03	-0.67	803	4	lasso	0.069	1.5e-07	1.03459	0.30086
NA	./WEIGHTS//train_weights/Q05655.ENSG00000163932.wgt.RDat	ENSG00000163932.PRKCD	3	53190025	53226733	0.1064	rs6807359	3.52	rs750527	0.056922	-5.17	-1.034	106	1	top1	0.057	1.7e-06	1.034	0.30114
NA	./WEIGHTS//train_weights/Q9UBR2.ENSG00000101160.wgt.RDat	ENSG00000101160.CTSZ	20	57570240	57582302	0.0494	rs11697149	-3.58	rs163781	0.00291	3.55	-0.087	89	89	blup	0.0042	0.11	-1.033	0.3014
NA	./WEIGHTS//train_weights/O14976.ENSG00000178950.wgt.RDat	ENSG00000178950.GAK	4	843064	926161	0.0724	rs6599389	6.69	rs6843423	0.03149	-4.74	-0.798	148	148	blup	0.033	0.00022	-1.0317	0.302
NA	./WEIGHTS//train_weights/P46439.ENSG00000134201.wgt.RDat	ENSG00000134201.GSTM5	1	110254864	110318050	0.3355	rs17598321	4.09	rs3754446	0.314002	-10.9	-0.365	89	28	enet	0.33	3.5e-34	1.0301	0.303
NA	./WEIGHTS//train_weights/P11766.ENSG00000197894.wgt.RDat	ENSG00000197894.ADH5	4	99992132	100009952	0.1612	rs16996598	-2.9	rs6823388	0.05725	-5.8	-0.705	129	129	bslmm	0.08	1.3e-08	1.0269	0.304
NA	./WEIGHTS//train_weights/Q16890.ENSG00000111907.wgt.RDat	ENSG00000111907.TPD52L1	6	125440195	125585553	0.0749	rs579493	-2.12	rs3799732	0.069744	-5.47	-1.027	151	1	top1	0.07	1.2e-07	1.027	0.304
NA	./WEIGHTS//train_weights/P49418.ENSG00000078053.wgt.RDat	ENSG00000078053.AMPH	7	38423305	38671167	0.0882	rs2191312	2.92	rs1019288	0.043158	4.38	-1.793	304	304	blup	0.047	1.3e-05	-1.0273	0.304
NA	./WEIGHTS//train_weights/Q96RU3.ENSG00000187239.wgt.RDat	ENSG00000187239.FNBP1	9	132649466	132805473	0.0392	rs7025992	2.644	rs3824538	0.059691	5.03	1.025	158	1	top1	0.06	9.7e-07	1.025	0.30536
NA	./WEIGHTS//train_weights/O75884.ENSG00000089050.wgt.RDat	ENSG00000089050.RBBP9	20	18467184	18477887	0.1737	rs6081150	1.39	rs6045490	0.062639	-5.97	0.328	94	94	bslmm	0.098	3.5e-10	-1.021	0.3072
NA	./WEIGHTS//train_weights/Q9UN37.ENSG00000132612.wgt.RDat	ENSG00000132612.VPS4A	16	69345259	69358949	0.0365	rs28409143	1.84	rs8057271	0.0337	4.37	0.882	66	3	lasso	0.037	0.00011	1.0187	0.308
NA	./WEIGHTS//train_weights/P34913.ENSG00000120915.wgt.RDat	ENSG00000120915.EPHX2	8	27348296	27403081	0.3333	rs1532278	-3.17	rs2741342	0.232593	-9.42	-1.232	188	9	lasso	0.38	2.1e-40	1.0187	0.308339
NA	./WEIGHTS//train_weights/P40121.ENSG00000042493.wgt.RDat	ENSG00000042493.CAPG	2	85621871	85645555	0.1761	rs7340340	1.931	rs3770102	0.111219	6.75	-0.158	88	88	blup	0.12	1.6e-12	1.017	0.309
NA	./WEIGHTS//train_weights/Q9NU23.ENSG00000083099.wgt.RDat	ENSG00000083099.LYRM2	6	90277863	90348472	0.2163	rs9344943	-1.72	rs34012596	0.197881	-7.88	-1.013	88	1	top1	0.2	2.1e-16	1.013	0.311
NA	./WEIGHTS//train_weights/P10746.ENSG00000188690.wgt.RDat	ENSG00000188690.UROS	10	127477146	127511817	0.1313	rs17153494	1.67	rs10794025	0.206029	9.5	0.757	67	8	enet	0.22	9.8e-22	1.01263	0.311238
NA	./WEIGHTS//train_weights/O14939.ENSG00000129219.wgt.RDat	ENSG00000129219.PLD2	17	4710391	4726729	0.0915	rs4790230	-2.18	rs3867173	0.0333	-4.32	-1.121	97	5	lasso	0.052	6.9e-06	1.01041	0.312
NA	./WEIGHTS//train_weights/Q8TAE6.ENSG00000198729.wgt.RDat	ENSG00000198729.PPP1R14C	6	150464212	150571493	0.1226	rs7770283	-2.61	rs9397821	0.033858	-5.03	1.201	210	4	lasso	0.038	8.8e-05	-1.0108	0.312
NA	./WEIGHTS//train_weights/O60279.ENSG00000173705.wgt.RDat	ENSG00000173705.SUSD5	3	33191537	33260707	0.2097	rs7620019	2.8	rs10222597	0.132685	7.02	0.557	106	7	lasso	0.18	5.1e-17	1.0096	0.3127
NA	./WEIGHTS//train_weights/Q15813.ENSG00000116957.wgt.RDat	ENSG00000116957.TBCE	1	235530675	235612283	0.4258	rs6429082	-2.25	rs4659838	0.024149	4.77	-1.455	95	10	enet	0.14	1.4e-14	-1.0056	0.315
NA	./WEIGHTS//train_weights/Q86YQ8.ENSG00000139117.wgt.RDat	ENSG00000139117.CPNE8	12	39040624	39301232	0.0454	rs4768505	-1.7	rs9325144	0.003958	-4.08	0.57	143	143	bslmm	0.016	0.0078	-1.005	0.315
NA	./WEIGHTS//train_weights/P08133.ENSG00000197043.wgt.RDat	ENSG00000197043.ANXA6	5	150480273	150537443	0.084	rs12109187	2.95	rs6859236	0.052267	-5.52	-1.553	205	6	enet	0.057	1.7e-06	1.0035	0.31563
NA	./WEIGHTS//train_weights/O95394.ENSG00000013375.wgt.RDat	ENSG00000013375.PGM3	6	83870869	83903655	0.12	rs474075	1.97	rs473267	0.19007	-8.67	-1.002	60	1	top1	0.19	4.3e-19	1.002	0.316
NA	./WEIGHTS//train_weights/Q15181.ENSG00000180817.wgt.RDat	ENSG00000180817.PPA1	10	71962586	71993667	0.0467	rs16927328	3.95	rs7905657	0.011822	-3.64	0.285	147	147	blup	0.03	0.00044	-0.99979	0.317414
NA	./WEIGHTS//train_weights/Q2TAA5.ENSG00000253710.wgt.RDat	ENSG00000253710.ALG11	13	52586534	52603800	0.0355	rs9526820	-2.57	rs9535825	0.024961	-3.96	0.997	95	1	top1	0.025	0.0014	-0.997	0.3188
NA	./WEIGHTS//train_weights/P17812.ENSG00000171793.wgt.RDat	ENSG00000171793.CTPS1	1	41445007	41478235	0.0472	rs4132440	-2.14	rs4453027	0.04457	-4.63	-0.995	102	1	top1	0.045	2.2e-05	0.9952	0.32
NA	./WEIGHTS//train_weights/Q9BWH6.ENSG00000103932.wgt.RDat	ENSG00000103932.RPAP1	15	41809374	41836467	0.0573	rs12440045	2.42	rs1200353	0.00809	-3.8	1.049	79	79	bslmm	0.032	0.00031	-0.99437	0.32004
NA	./WEIGHTS//train_weights/Q14156.ENSG00000132294.wgt.RDat	ENSG00000132294.EFR3A	8	132916335	133025889	0.0403	rs2436100	-2.17	rs1501061	0.023695	-4.24	-1.107	168	9	enet	0.029	0.0005	0.9941	0.320194
NA	./WEIGHTS//train_weights/Q68DQ2.ENSG00000080200.wgt.RDat	ENSG00000080200.CRYBG3	3	97595819	97663810	0.07	rs832078	-2.41	rs1911114	0.059055	4.32	-0.992	104	1	top1	0.059	0.0001	-0.992	0.3212
NA	./WEIGHTS//train_weights/Q16798.ENSG00000151376.wgt.RDat	ENSG00000151376.ME3	11	86152150	86383678	0.116	rs11234658	3.56	rs12362089	0.030548	5.1	0.977	292	5	lasso	0.045	2.1e-05	0.99055	0.32191
NA	./WEIGHTS//train_weights/O00329.ENSG00000171608.wgt.RDat	ENSG00000171608.PIK3CD	1	9711790	9789172	0.0587	rs12738754	2.46	rs4240895	0.033819	4.08	1.333	87	87	blup	0.046	3.3e-05	0.9913	0.322
NA	./WEIGHTS//train_weights/O95822.ENSG00000103150.wgt.RDat	ENSG00000103150.MLYCD	16	83932731	83949787	0.1081	rs153658	-2.78	rs9923900	0.107	-6.47	-0.991	165	1	top1	0.11	4.9e-11	0.991	0.322
NA	./WEIGHTS//train_weights/P10599.ENSG00000136810.wgt.RDat	ENSG00000136810.TXN	9	113006091	113018920	0.2065	rs10119804	2.182	rs1049927	0.097516	-6.54	-0.024	142	142	bslmm	0.13	9e-13	0.9892	0.32258
NA	./WEIGHTS//train_weights/Q8WWI1.ENSG00000136153.wgt.RDat	ENSG00000136153.LMO7	13	76194570	76434004	0.0481	rs12427729	2.05	rs530855	0.017608	4	0.622	233	233	bslmm	0.023	0.0018	0.988	0.3229
NA	./WEIGHTS//train_weights/P29218.ENSG00000133731.wgt.RDat	ENSG00000133731.IMPA1	8	82570196	82598928	0.1166	rs10112819	1.83	rs1967328	0.051409	-5.28	0.434	88	5	lasso	0.061	7.5e-07	-0.9848	0.324729
NA	./WEIGHTS//train_weights/P49916.ENSG00000005156.wgt.RDat	ENSG00000005156.LIG3	17	33307513	33332083	0.0674	rs17545903	1.66	rs16970540	0.0243	4.16	0.361	53	10	enet	0.057	2.4e-06	0.98378	0.325
NA	./WEIGHTS//train_weights/O75874.ENSG00000138413.wgt.RDat	ENSG00000138413.IDH1	2	209100951	209130798	0.0443	rs6751157	2.795	rs6710217	0.046821	-4.51	0.984	91	1	top1	0.047	1.4e-05	-0.984	0.325
NA	./WEIGHTS//train_weights/P53602.ENSG00000167508.wgt.RDat	ENSG00000167508.MVD	16	88718343	88729569	0.2703	rs7203305	2.25	rs4782395	0.0814	-6.69	0.196	128	4	lasso	0.16	7.6e-16	-0.9793	0.327
NA	./WEIGHTS//train_weights/Q15031.ENSG00000011376.wgt.RDat	ENSG00000011376.LARS2	3	45429998	45590913	0.2377	rs4683131	-2.35	rs12638088	0.268326	-10.32	1.126	159	6	lasso	0.29	1.8e-29	-0.9786	0.32776
NA	./WEIGHTS//train_weights/O14810.ENSG00000168993.wgt.RDat	ENSG00000168993.CPLX1	4	778745	819986	0.0566	rs3775121	-6.16	rs10155282	0.01439	-4.05	-0.978	111	1	top1	0.014	0.011	0.978	0.328
NA	./WEIGHTS//train_weights/Q92806.ENSG00000162728.wgt.RDat	ENSG00000162728.KCNJ9	1	160051360	160060353	0.1101	rs6670382	-2.84	rs2737703	0.130642	-7.24	-0.976	139	2	lasso	0.13	4.6e-12	0.9763	0.329
NA	./WEIGHTS//train_weights/Q9NQ11.ENSG00000159363.wgt.RDat	ENSG00000159363.ATP13A2	1	17312453	17338423	0.0567	rs9435739	-1.69	rs926702	0.043251	-4.91	-1.306	113	113	bslmm	0.047	1.6e-05	0.9752	0.329
NA	./WEIGHTS//train_weights/P50747.ENSG00000159267.wgt.RDat	ENSG00000159267.HLCS	21	38123189	38362536	0.0883	rs1235344	1.97	rs3787741	0.006338	4.41	-0.022	193	193	blup	0.055	3.4e-06	-0.975	0.3294
NA	./WEIGHTS//train_weights/Q9ULE6.ENSG00000107719.wgt.RDat	ENSG00000107719.PALD1	10	72238577	72328205	0.073	rs10823548	-2.19	rs12354806	-0.001362	3.11	1.427	153	153	bslmm	0.008	0.049	-0.9746	0.329757
NA	./WEIGHTS//train_weights/Q7L5N7.ENSG00000087253.wgt.RDat	ENSG00000087253.LPCAT2	16	55542910	55620582	0.1019	rs4783897	-2.12	rs1393257	0.122	7.33	-0.975	172	1	top1	0.12	2.1e-12	-0.975	0.33
NA	./WEIGHTS//train_weights/Q8TAA3.ENSG00000154611.wgt.RDat	ENSG00000154611.PSMA8	18	23713816	23773319	0.0324	rs963267	-1.81	rs12960119	0.0115	3.28	0.911	48	48	bslmm	0.014	0.012	0.974	0.33
NA	./WEIGHTS//train_weights/Q8IUF8.ENSG00000170854.wgt.RDat	ENSG00000170854.MINA	3	97660662	97691301	0.0684	rs832078	-2.41	rs3856567	0.053347	4.34	-0.973	107	1	top1	0.053	0.00039	-0.973	0.33055
NA	./WEIGHTS//train_weights/Q86TW2.ENSG00000063761.wgt.RDat	ENSG00000063761.ADCK1	14	78266426	78401355	0.2469	rs6574416	-3.06	rs2364748	0.178022	9.42	0.472	199	9	lasso	0.28	2e-27	0.9706	0.3317
NA	./WEIGHTS//train_weights/P06733.ENSG00000074800.wgt.RDat	ENSG00000074800.ENO1	1	8921061	8939308	0.1291	rs3820037	2.46	rs2765512	0.051969	-4.58	1.622	97	18	enet	0.096	5.2e-10	-0.9698	0.332
NA	./WEIGHTS//train_weights/P50225.ENSG00000196502.wgt.RDat	ENSG00000196502.SULT1A1	16	28616903	28634946	0.2801	rs2411453	-2.65	rs1968752	0.106	-7.07	-1.957	45	10	lasso	0.18	2.5e-18	0.96792	0.333
NA	./WEIGHTS//train_weights/Q9H2K0.ENSG00000122033.wgt.RDat	ENSG00000122033.MTIF3	13	28009776	28024739	0.1085	rs7317689	2.16	rs2892058	-0.001394	-3.32	-0.237	117	117	bslmm	0.016	0.008	-0.967	0.3338
NA	./WEIGHTS//train_weights/Q9NR45.ENSG00000095380.wgt.RDat	ENSG00000095380.NANS	9	100819021	100845357	0.2213	rs10818575	2.477	rs10818468	0.230208	-9.47	-0.447	109	109	bslmm	0.24	7.5e-24	0.9654	0.33433
NA	./WEIGHTS//train_weights/Q16881.ENSG00000198431.wgt.RDat	ENSG00000198431.TXNRD1	12	104609557	104744061	0.0345	rs6539145	-2.06	rs7310505	0.018179	3.98	0.965	126	1	top1	0.018	0.0051	0.965	0.335
NA	./WEIGHTS//train_weights/P05060.ENSG00000089199.wgt.RDat	ENSG00000089199.CHGB	20	5892076	5906007	0.0581	rs6085347	3.8	rs2821	0.041089	-4.37	0.964	155	1	top1	0.041	4.5e-05	-0.964	0.335
NA	./WEIGHTS//train_weights/Q8TBG4.ENSG00000164089.wgt.RDat	ENSG00000164089.ETNPPL	4	109663196	109684210	0.0404	rs965935	-2.47	rs10022412	0.01409	3.95	-0.365	94	5	lasso	0.014	0.013	-0.9644	0.335
NA	./WEIGHTS//train_weights/P07203.ENSG00000233276.wgt.RDat	ENSG00000233276.GPX1	3	49394609	49396033	0.2944	rs11920251	-1.55	rs17080528	0.334448	-11.25	0.963	52	1	top1	0.33	3.7e-35	-0.963	0.33555
NA	./WEIGHTS//train_weights/Q9Y3E2.ENSG00000178096.wgt.RDat	ENSG00000178096.BOLA1	1	149859440	149872351	0.1788	rs7517103	2.32	rs15931	0.247476	10.09	-0.962	24	1	top1	0.25	4e-25	-0.962	0.336
NA	./WEIGHTS//train_weights/Q9H479.ENSG00000167363.wgt.RDat	ENSG00000167363.FN3K	17	80693451	80709073	0.1482	rs6502134	-2.56	rs3848403	0.00859	3.22	-1.393	80	80	bslmm	0.05	7.8e-06	-0.96297	0.336
NA	./WEIGHTS//train_weights/P53370.ENSG00000170917.wgt.RDat	ENSG00000170917.NUDT6	4	123809852	123844123	0.2659	rs308443	-2.34	rs3747676	0.35016	-10.53	0.841	89	8	lasso	0.37	3.4e-33	-0.9617	0.336
NA	./WEIGHTS//train_weights/Q9UFN0.ENSG00000136783.wgt.RDat	ENSG00000136783.NIPSNAP3A	9	107509969	107522403	0.0416	rs4149339	2.101	rs10820720	0.00027	-3.74	1.102	128	128	blup	0.0083	0.043	-0.9605	0.33679
NA	./WEIGHTS//train_weights/Q96MT3.ENSG00000139174.wgt.RDat	ENSG00000139174.PRICKLE1	12	42852140	42984157	0.0739	rs1669947	2.69	rs3747562	0.013651	-3.97	-0.593	95	95	bslmm	0.027	0.0024	0.96	0.337
NA	./WEIGHTS//train_weights/O43491.ENSG00000079819.wgt.RDat	ENSG00000079819.EPB41L2	6	131160487	131384462	0.064	rs2008593	-2.11	rs677072	-0.000536	3.29	-0.026	213	213	bslmm	0.015	0.01	-0.9605	0.337
NA	./WEIGHTS//train_weights/P49914.ENSG00000136371.wgt.RDat	ENSG00000136371.MTHFS	15	80125927	80189721	0.0487	rs17284990	2.44	rs685487	0.01011	3.28	2.357	127	127	blup	0.023	0.015	0.95961	0.33725
NA	./WEIGHTS//train_weights/P12271.ENSG00000140522.wgt.RDat	ENSG00000140522.RLBP1	15	89753100	89764982	0.0981	rs2283436	2.71	rs2283433	0.13375	7.37	-1.051	97	4	lasso	0.13	1.2e-13	-0.95619	0.33898
NA	./WEIGHTS//train_weights/O00142.ENSG00000166548.wgt.RDat	ENSG00000166548.TK2	16	66541906	66586447	0.039	rs9788905	1.75	rs16956585	0.025	-4.38	0.994	107	107	bslmm	0.037	0.00011	-0.95151	0.341
NA	./WEIGHTS//train_weights/Q16891.ENSG00000132305.wgt.RDat	ENSG00000132305.IMMT	2	86371055	86422893	0.0427	rs7583021	1.813	rs311563	0.015342	4.05	0.385	133	8	enet	0.017	0.0062	0.9524	0.341
NA	./WEIGHTS//train_weights/Q9Y4D1.ENSG00000100592.wgt.RDat	ENSG00000100592.DAAM1	14	59655364	59838123	0.1878	rs4901917	2.169	rs1253035	0.025487	-4.33	1.318	166	166	blup	0.072	7.2e-08	-0.9519	0.3412
NA	./WEIGHTS//train_weights/P36871.ENSG00000079739.wgt.RDat	ENSG00000079739.PGM1	1	64058947	64125916	0.1666	rs13374611	-2.37	rs11208257	0.064324	-6.04	1.807	139	17	enet	0.097	3.6e-10	-0.95	0.342
NA	./WEIGHTS//train_weights/Q9Y2E5.ENSG00000013288.wgt.RDat	ENSG00000013288.MAN2B2	4	6576902	6625089	0.1846	rs4689486	2.72	rs2301795	0.15484	7.4	-0.949	106	1	top1	0.15	1.9e-14	-0.949	0.343
NA	./WEIGHTS//train_weights/P30043.ENSG00000090013.wgt.RDat	ENSG00000090013.BLVRB	19	40953696	40971747	0.092	rs8110888	-2.23	rs2169275	-0.002635	3.63	-1.178	84	84	blup	0.024	0.0014	-0.9451	0.3446
NA	./WEIGHTS//train_weights/Q969Q5.ENSG00000169228.wgt.RDat	ENSG00000169228.RAB24	5	176728199	176730745	0.0583	rs28932178	2.57	rs28362590	0.052802	4.97	1.399	73	2	lasso	0.053	3.6e-06	0.9433	0.34552
NA	./WEIGHTS//train_weights/P20591.ENSG00000157601.wgt.RDat	ENSG00000157601.MX1	21	42792231	42831141	0.0575	rs457920	2.25	rs469066	0.043025	-4.89	0.943	159	1	top1	0.043	3e-05	-0.943	0.3457
NA	./WEIGHTS//train_weights/P42704.ENSG00000138095.wgt.RDat	ENSG00000138095.LRPPRC	2	44113647	44223144	0.1059	rs7590420	-3.2	rs7568481	0.056507	5.72	-0.276	177	14	enet	0.11	1.2e-11	-0.9412	0.347
NA	./WEIGHTS//train_weights/O43819.ENSG00000130489.wgt.RDat	ENSG00000130489.SCO2	22	50961997	50964868	0.2826	rs6151429	-3.94	rs5770871	0.089104	-6.73	0.53	106	106	bslmm	0.19	6.9e-19	-0.93979	0.347
NA	./WEIGHTS//train_weights/Q8N2F6.ENSG00000170632.wgt.RDat	ENSG00000170632.ARMC10	7	102715328	102740205	0.2271	rs12540583	3.43	rs4729873	0.159554	-7.87	1.408	32	3	lasso	0.17	1.2e-16	-0.938	0.348
NA	./WEIGHTS//train_weights/Q99584.ENSG00000189171.wgt.RDat	ENSG00000189171.S100A13	1	153591263	153606568	0.1948	rs7549308	1.78	rs9330299	0.355312	-12.29	-1.438	67	23	enet	0.39	8.7e-43	0.9347	0.35
NA	./WEIGHTS//train_weights/Q9BXI3.ENSG00000116981.wgt.RDat	ENSG00000116981.NT5C1A	1	40124793	40137710	0.1533	rs12127094	2	rs9662128	0.110562	6.48	-0.731	91	91	blup	0.11	4.2e-11	-0.9345	0.35
NA	./WEIGHTS//train_weights/Q8WWZ7.ENSG00000154265.wgt.RDat	ENSG00000154265.ABCA5	17	67240452	67323385	0.1635	rs11655507	-2.11	rs1550828	0.186	8.56	1.083	92	92	blup	0.19	3.1e-19	0.9351	0.35
NA	./WEIGHTS//train_weights/Q96IW2.ENSG00000105251.wgt.RDat	ENSG00000105251.SHD	19	4278598	4290721	0.0728	rs10419363	-2	rs4740	0.063076	5.29	-0.122	74	74	blup	0.077	7e-08	-0.9322	0.3512
NA	./WEIGHTS//train_weights/Q8IVD9.ENSG00000015676.wgt.RDat	ENSG00000015676.NUDCD3	7	44418720	44530479	0.0538	rs35705461	-2.57	rs1043084	0.083302	5.76	0.93	106	1	top1	0.083	7.2e-09	0.93	0.352
NA	./WEIGHTS//train_weights/Q86XE0.ENSG00000172803.wgt.RDat	ENSG00000172803.SNX32	11	65601112	65624367	0.1683	rs606978	1.55	rs2231884	0.183359	8.7	0.929	86	1	top1	0.18	2e-18	0.929	0.35289
NA	./WEIGHTS//train_weights/Q9NX74.ENSG00000167264.wgt.RDat	ENSG00000167264.DUS2	16	68021649	68113223	0.0597	rs11075664	-1.16	rs7193701	0.000724	3.55	0.652	48	48	bslmm	0.012	0.029	0.92803	0.353
NA	./WEIGHTS//train_weights/P22570.ENSG00000161513.wgt.RDat	ENSG00000161513.FDXR	17	72858619	72869156	0.3056	rs11649883	2.89	rs690514	0.426	-12.71	0.927	102	1	top1	0.43	2.9e-47	-0.927	0.354
NA	./WEIGHTS//train_weights/Q9BWM7.ENSG00000107819.wgt.RDat	ENSG00000107819.SFXN3	10	102790991	102800998	0.407	rs807028	-3.24	rs7099531	0.080111	-6.9	-0.228	101	24	enet	0.22	4.4e-22	-0.92636	0.354258
NA	./WEIGHTS//train_weights/Q8WV74.ENSG00000167799.wgt.RDat	ENSG00000167799.NUDT8	11	67395409	67397401	0.1693	rs11227881	1.84	rs12421762	0.009496	3.2	-0.811	67	67	bslmm	0.047	0.00032	-0.92539	0.35477
NA	./WEIGHTS//train_weights/Q96SN7.ENSG00000160991.wgt.RDat	ENSG00000160991.ORAI2	7	102073553	102097268	0.0623	rs1131383	-2.04	rs11764413	0.040048	-4.21	-1.377	41	7	enet	0.057	0.00022	0.9246	0.355
NA	./WEIGHTS//train_weights/Q9BY32.ENSG00000125877.wgt.RDat	ENSG00000125877.ITPA	20	3189514	3204516	0.5772	rs2295547	-4.92	rs6139030	0.352829	-11.8	0.028	96	96	bslmm	0.48	4.1e-55	-0.924	0.3553
NA	./WEIGHTS//train_weights/P09668.ENSG00000103811.wgt.RDat	ENSG00000103811.CTSH	15	79213400	79241916	0.3756	rs5849	2.42	rs12148472	0.27341	-10.07	-0.921	96	1	top1	0.27	2e-27	0.921	0.35705
NA	./WEIGHTS//train_weights/Q9Y265.ENSG00000175792.wgt.RDat	ENSG00000175792.RUVBL1	3	127783621	127872757	0.0427	rs13100951	1.73	rs11717102	0.058684	-4.95	0.919	79	1	top1	0.059	1.2e-06	-0.919	0.3581
NA	./WEIGHTS//train_weights/P0C7P0.ENSG00000230055.wgt.RDat	ENSG00000230055.CISD3	17	36886488	36891297	0.394	rs2302472	2.68	rs2879097	0.389	-12.09	-0.918	60	1	top1	0.39	2.5e-41	0.918	0.359
NA	./WEIGHTS//train_weights/Q9Y6K8.ENSG00000154027.wgt.RDat	ENSG00000154027.AK5	1	77747736	78025651	0.0864	rs9787306	3.36	rs728741	0.086204	5.97	-0.915	265	1	top1	0.086	3.9e-09	-0.915	0.36
NA	./WEIGHTS//train_weights/O75390.ENSG00000062485.wgt.RDat	ENSG00000062485.CS	12	56665483	56694176	0.0318	rs872103	-1.88	rs2306693	0.013336	-3.18	0.107	42	42	blup	0.022	0.0025	-0.9149	0.36
NA	./WEIGHTS//train_weights/Q9NW97.ENSG00000171729.wgt.RDat	ENSG00000171729.TMEM51	1	15479028	15546976	0.0784	rs10927751	-2.89	rs742668	0.05443	-4.51	-0.912	189	1	top1	0.054	1.1e-05	0.912	0.362
NA	./WEIGHTS//train_weights/Q08752.ENSG00000171497.wgt.RDat	ENSG00000171497.PPID	4	159630286	159644548	0.7943	rs13106979	-2.19	rs17843966	0.29978	10.65	-1.111	29	29	bslmm	0.42	5.2e-47	-0.9119	0.362
NA	./WEIGHTS//train_weights/Q9HCH5.ENSG00000137501.wgt.RDat	ENSG00000137501.SYTL2	11	85405267	85522184	0.1464	rs10792819	1.55	rs11234388	0.016191	4.41	-1.29	141	141	blup	0.049	9.5e-06	-0.91139	0.36209
NA	./WEIGHTS//train_weights/P04271.ENSG00000160307.wgt.RDat	ENSG00000160307.S100B	21	48018875	48025121	0.0919	rs9978658	1.58	rs2070428	0.010928	4.66	-0.673	95	95	blup	0.08	2e-07	-0.911	0.3625
NA	./WEIGHTS//train_weights/Q9UKU7.ENSG00000151498.wgt.RDat	ENSG00000151498.ACAD8	11	134123389	134135749	0.051	rs10791349	2.49	rs1146188	-0.00267	3.17	-1.19	87	87	bslmm	0.011	0.022	-0.9101	0.36277
NA	./WEIGHTS//train_weights/Q9UKG1.ENSG00000157500.wgt.RDat	ENSG00000157500.APPL1	3	57261765	57307496	0.0421	rs4681960	-1.83	rs4325895	-0.000525	-3.01	-0.315	75	75	bslmm	0.018	0.005	0.91	0.36282
NA	./WEIGHTS//train_weights/P27824.ENSG00000127022.wgt.RDat	ENSG00000127022.CANX	5	179105629	179157926	0.025	rs4701137	2.39	rs12652934	0.023817	3.75	-0.908	78	1	top1	0.024	0.0016	-0.908	0.36388
NA	./WEIGHTS//train_weights/Q86WR0.ENSG00000147419.wgt.RDat	ENSG00000147419.CCDC25	8	27590835	27630170	0.0523	rs12542107	2.45	rs9797	0.036251	4.29	-0.371	150	150	blup	0.037	0.00013	-0.906	0.364918
NA	./WEIGHTS//train_weights/Q96C23.ENSG00000143891.wgt.RDat	ENSG00000143891.GALM	2	38893052	38968379	0.4461	rs3112142	-2.67	rs3821023	0.464673	13.25	0.803	83	7	lasso	0.51	2.3e-59	0.9041	0.366
NA	./WEIGHTS//train_weights/O15061.ENSG00000182253.wgt.RDat	ENSG00000182253.SYNM	15	99638420	99675798	0.0777	rs7178187	-2.82	rs1703770	0.05186	-5.47	-1.664	162	3	lasso	0.084	5.9e-09	0.90284	0.36661
NA	./WEIGHTS//train_weights/Q9H9A6.ENSG00000066557.wgt.RDat	ENSG00000066557.LRRC40	1	70610488	70671303	0.1841	rs12033206	2.03	rs476591	0.082329	-5.85	1.066	98	14	lasso	0.089	2.3e-09	-0.9019	0.367
NA	./WEIGHTS//train_weights/Q6ZMT1.ENSG00000141750.wgt.RDat	ENSG00000141750.STAC2	17	37366789	37382125	0.0664	rs16541	-2.33	rs17632667	0.0014	3.54	-1.156	96	96	bslmm	0.022	0.0023	-0.90302	0.367
NA	./WEIGHTS//train_weights/P27701.ENSG00000085117.wgt.RDat	ENSG00000085117.CD82	11	44585977	44641913	0.1144	rs782404	2.06	rs7935166	0.115427	6.82	-0.901	170	1	top1	0.12	7.8e-12	-0.901	0.36759
NA	./WEIGHTS//train_weights/Q5T1M5.ENSG00000119321.wgt.RDat	ENSG00000119321.FKBP15	9	115923286	115983641	0.0421	rs17755206	-2.311	rs3827673	-0.002482	3.26	-0.463	147	147	bslmm	0.0081	0.044	-0.9005	0.36785
NA	./WEIGHTS//train_weights/Q9H115.ENSG00000125814.wgt.RDat	ENSG00000125814.NAPB	20	23355159	23402125	0.0306	rs11906294	-2.95	rs8615	0.022308	4.01	0.754	157	2	lasso	0.023	0.0021	0.9	0.3681
NA	./WEIGHTS//train_weights/P54296.ENSG00000036448.wgt.RDat	ENSG00000036448.MYOM2	8	1993155	2113475	0.3424	rs6983226	3	rs2280817	0.039887	5.72	0.737	287	23	enet	0.2	3.5e-12	0.8965	0.369998
NA	./WEIGHTS//train_weights/Q6PCB8.ENSG00000170571.wgt.RDat	ENSG00000170571.EMB	5	49692026	49739082	0.0865	rs16879125	1.88	rs11746545	0.034631	5	0.961	53	14	enet	0.063	2e-06	0.8964	0.37001
NA	./WEIGHTS//train_weights/Q5T9C9.ENSG00000167103.wgt.RDat	ENSG00000167103.PIP5KL1	9	130683158	130693076	0.1298	rs7865146	-1.726	rs7865476	0.145137	-7.41	-0.819	73	3	lasso	0.15	1.4e-14	0.8944	0.37111
NA	./WEIGHTS//train_weights/P25445.ENSG00000026103.wgt.RDat	ENSG00000026103.FAS	10	90750414	90775542	0.3244	rs11202898	3.01	rs7097572	0.438016	12.67	-0.954	144	13	enet	0.45	8.4e-49	-0.89289	0.371914
NA	./WEIGHTS//train_weights/P51580.ENSG00000137364.wgt.RDat	ENSG00000137364.TPMT	6	18128542	18155305	0.3987	rs764099	-2.19	rs1142345	0.354743	-12.28	0.76	109	7	lasso	0.41	2.5e-45	-0.8926	0.372
NA	./WEIGHTS//train_weights/Q9NRG1.ENSG00000099256.wgt.RDat	ENSG00000099256.PRTFDC1	10	25137536	25241533	0.1143	rs11014319	-2.58	rs274296	0.070056	-5.76	0.891	110	1	top1	0.07	1.1e-07	-0.891	0.372929
NA	./WEIGHTS//train_weights/Q9BS92.ENSG00000165028.wgt.RDat	ENSG00000165028.NIPSNAP3B	9	107526438	107539738	0.2527	rs4149339	2.101	rs10820726	0.32729	-11.41	0.891	132	1	top1	0.33	2.8e-34	-0.891	0.37293
NA	./WEIGHTS//train_weights/P14324.ENSG00000160752.wgt.RDat	ENSG00000160752.FDPS	1	155278539	155290457	0.1739	rs12748814	3.05	rs2297480	0.237787	-9.63	-0.891	40	1	top1	0.24	4.5e-24	0.891	0.373
NA	./WEIGHTS//train_weights/P49321.ENSG00000132780.wgt.RDat	ENSG00000132780.NASP	1	46049518	46084566	0.0201	rs945179	-1.35	rs3014210	0.026812	-3.79	0.89	84	1	top1	0.027	0.00084	-0.89	0.373
NA	./WEIGHTS//train_weights/Q86UY8.ENSG00000111696.wgt.RDat	ENSG00000111696.NT5DC3	12	104164231	104234975	0.2702	rs4981022	-3.18	rs7314150	0.074111	6.85	1.089	251	251	blup	0.21	9.7e-21	0.8914	0.373
NA	./WEIGHTS//train_weights/O75106.ENSG00000131480.wgt.RDat	ENSG00000131480.AOC2	17	40996617	41002724	0.0802	rs324079	-2.63	rs9910698	0.0444	3.94	0.891	22	1	top1	0.044	0.00021	0.891	0.373
NA	./WEIGHTS//train_weights/Q9BV57.ENSG00000182551.wgt.RDat	ENSG00000182551.ADI1	2	3501132	3523507	0.0807	rs10197139	3.008	rs1130333	-0.002706	-3.76	-1.253	91	91	blup	0.019	0.0052	0.8915	0.373
NA	./WEIGHTS//train_weights/Q9NVH1.ENSG00000007923.wgt.RDat	ENSG00000007923.DNAJC11	1	6694228	6761984	0.1764	rs2232463	-2.13	rs200448	0.04855	5.23	0.451	109	13	enet	0.11	1.9e-11	0.8862	0.375
NA	./WEIGHTS//train_weights/P23297.ENSG00000160678.wgt.RDat	ENSG00000160678.S100A1	1	153600402	153604513	0.0238	rs7549308	1.78	rs11497739	0.021401	-4.11	-0.885	64	1	top1	0.021	0.0034	0.885	0.376
NA	./WEIGHTS//train_weights/Q5JTJ3.ENSG00000168275.wgt.RDat	ENSG00000168275.COA6	1	234509202	234519795	0.1776	rs2991951	-2.63	rs4027040	0.136432	-7.61	0.883	157	1	top1	0.14	8.1e-14	-0.883	0.377
NA	./WEIGHTS//train_weights/Q9NPL8.ENSG00000113845.wgt.RDat	ENSG00000113845.TIMMDC1	3	119217379	119243937	0.0611	rs1880661	2.75	rs2049500	0.039095	-4.35	0.883	136	1	top1	0.039	0.00011	-0.883	0.37724
NA	./WEIGHTS//train_weights/Q6ZMQ8.ENSG00000181409.wgt.RDat	ENSG00000181409.AATK	17	79091095	79139877	0.0454	rs885362	2.54	rs11664	0.0167	3.5	-0.83	85	85	blup	0.02	0.0034	-0.87664	0.381
NA	./WEIGHTS//train_weights/Q9H6V9.ENSG00000118961.wgt.RDat	ENSG00000118961.C2orf43	2	20883788	21022882	0.1674	rs16987880	2.633	rs13394027	0.1911	-8.84	-0.982	159	9	enet	0.21	2.4e-19	0.8759	0.381
NA	./WEIGHTS//train_weights/Q9NYS0.ENSG00000197885.wgt.RDat	ENSG00000197885.NKIRAS1	3	23933151	23988082	0.0628	rs9847444	2.51	rs6550805	0.038812	4.2	0.874	94	1	top1	0.039	7.1e-05	0.874	0.38212
NA	./WEIGHTS//train_weights/Q969Z3.ENSG00000117791.wgt.RDat	ENSG00000117791.MARC2	1	220921567	220958150	0.0566	rs2738756	2.11	rs6697965	0.075258	-5.75	1.546	132	13	enet	0.079	1.8e-08	-0.8711	0.384
NA	./WEIGHTS//train_weights/Q7Z6M1.ENSG00000136933.wgt.RDat	ENSG00000136933.RABEPK	9	127962821	127996437	0.079	rs10986626	-2.234	rs393721	0.027816	-4.07	0.382	65	11	enet	0.043	5.7e-05	-0.8705	0.38402
NA	./WEIGHTS//train_weights/Q96PE3.ENSG00000040933.wgt.RDat	ENSG00000040933.INPP4A	2	99061317	99210853	0.0286	rs11123677	-2.842	rs2278206	0.041513	-4.44	0.869	108	1	top1	0.042	4.1e-05	-0.869	0.385
NA	./WEIGHTS//train_weights/P0C7U0.ENSG00000225968.wgt.RDat	ENSG00000225968.ELFN1	7	1727755	1787590	0.0815	rs1112898	-2.5	rs12670854	0.001789	-3.49	0.938	92	92	bslmm	0.012	0.034	-0.8692	0.385
NA	./WEIGHTS//train_weights/Q9Y2K9.ENSG00000145087.wgt.RDat	ENSG00000145087.STXBP5L	3	120626919	121143608	0.1123	rs7618583	2.18	rs3914164	0.003821	-3.52	0.574	205	205	blup	0.039	7.1e-05	-0.8669	0.38601
NA	./WEIGHTS//train_weights/Q96GY0.ENSG00000104427.wgt.RDat	ENSG00000104427.ZC2HC1A	8	79578282	79632000	0.0444	rs16919538	3.73	rs2369440	0.064028	5.35	0.866	82	1	top1	0.064	4e-07	0.866	0.38649
NA	./WEIGHTS//train_weights/Q7Z4W1.ENSG00000169738.wgt.RDat	ENSG00000169738.DCXR	17	79993012	79995608	0.0634	rs4239275	-3.18	rs4625783	0.00685	-3.61	2.101	61	20	enet	0.042	4e-05	-0.8646	0.387
NA	./WEIGHTS//train_weights/P57087.ENSG00000154721.wgt.RDat	ENSG00000154721.JAM2	21	27011584	27089874	0.1756	rs10854295	1.99	rs974680	0.066754	6.6	0.684	92	92	blup	0.14	1.8e-14	0.864	0.3878
NA	./WEIGHTS//train_weights/Q8WVJ2.ENSG00000170584.wgt.RDat	ENSG00000170584.NUDCD2	5	162873532	162887146	0.0357	rs13183712	-2	rs299289	0.061171	4.91	0.862	103	1	top1	0.061	7.2e-07	0.862	0.38869
NA	./WEIGHTS//train_weights/Q99733.ENSG00000205531.wgt.RDat	ENSG00000205531.NAP1L4	11	2965667	3013607	0.0566	rs450208	1.83	rs16928841	0.015327	3.5	0.889	126	126	bslmm	0.021	0.0026	0.86096	0.38926
NA	./WEIGHTS//train_weights/Q9BW83.ENSG00000100360.wgt.RDat	ENSG00000100360.IFT27	22	37154246	37172300	0.0908	rs2269511	-2.31	rs3827351	0.096697	6.76	-1.436	131	3	lasso	0.11	1.8e-11	-0.86011	0.39
NA	./WEIGHTS//train_weights/Q9NVV4.ENSG00000107951.wgt.RDat	ENSG00000107951.MTPAP	10	30598730	30663377	0.0616	rs1781278	-2.47	rs7094037	0.091547	-6.22	-0.855	105	1	top1	0.092	1.3e-09	0.855	0.392551
NA	./WEIGHTS//train_weights/O95786.ENSG00000107201.wgt.RDat	ENSG00000107201.DDX58	9	32455300	32526322	0.0691	rs10738886	-2.364	rs7026407	-0.000731	3.37	1.069	128	128	bslmm	0.012	0.017	0.8538	0.3932
NA	./WEIGHTS//train_weights/Q99572.ENSG00000089041.wgt.RDat	ENSG00000089041.P2RX7	12	121570622	121623876	0.5697	rs208305	3.01	rs3751143	0.353746	-11.59	-0.961	144	31	enet	0.52	1.5e-62	0.8523	0.394
NA	./WEIGHTS//train_weights/Q8N5Z0.ENSG00000109576.wgt.RDat	ENSG00000109576.AADAT	4	170981373	171012850	0.0313	rs11736939	2.81	rs2054555	-0.00247	-3.3	1.453	101	101	bslmm	0.011	0.044	-0.8499	0.395
NA	./WEIGHTS//train_weights/P11172.ENSG00000114491.wgt.RDat	ENSG00000114491.UMPS	3	124449213	124464040	0.1891	rs652863	-2.05	rs6768588	0.261422	9.94	0.541	148	148	blup	0.3	4.3e-30	0.8505	0.39505
NA	./WEIGHTS//train_weights/Q96RP9.ENSG00000168827.wgt.RDat	ENSG00000168827.GFM1	3	158362067	158410364	0.0931	rs4679834	1.6	rs17699324	0.051272	-5.24	-1.098	97	97	blup	0.058	1.3e-06	0.85	0.39533
NA	./WEIGHTS//train_weights/Q6UVK1.ENSG00000173546.wgt.RDat	ENSG00000173546.CSPG4	15	75966663	76005189	0.0292	rs11072552	-1.49	rs4503758	-0.00249	-3.31	0.003	60	60	blup	0.015	0.01	0.84935	0.39569
NA	./WEIGHTS//train_weights/Q99829.ENSG00000214078.wgt.RDat	ENSG00000214078.CPNE1	20	34213953	34252878	0.2653	rs2425067	-1.81	rs2425141	0.235785	-9.7	1.269	84	18	enet	0.24	1.7e-24	-0.847	0.3969
NA	./WEIGHTS//train_weights/Q13510.ENSG00000104763.wgt.RDat	ENSG00000104763.ASAH1	8	17913934	17942494	0.0378	rs574774	-1.63	rs4377998	0.050869	-4.7	0.844	180	1	top1	0.051	7.2e-06	-0.844	0.398669
NA	./WEIGHTS//train_weights/Q9UJ70.ENSG00000124357.wgt.RDat	ENSG00000124357.NAGK	2	71291474	71306935	0.1219	rs2080643	-2.281	rs10202354	0.034369	-4.33	-0.841	104	1	top1	0.034	0.00018	0.841	0.4
NA	./WEIGHTS//train_weights/O14618.ENSG00000173992.wgt.RDat	ENSG00000173992.CCS	11	66360292	66373490	0.0754	rs2275998	2.54	rs11550057	0.02422	-3.85	2.169	64	5	lasso	0.027	0.00085	-0.84159	0.40002
NA	./WEIGHTS//train_weights/Q9Y289.ENSG00000138074.wgt.RDat	ENSG00000138074.SLC5A6	2	27422455	27435826	0.0851	rs4665963	3.022	rs1659698	0.000378	-3.82	1.05	79	79	bslmm	0.061	2.9e-05	-0.8365	0.403
NA	./WEIGHTS//train_weights/Q6YN16.ENSG00000119471.wgt.RDat	ENSG00000119471.HSDL2	9	115142217	115234690	0.1294	rs6477925	-1.4	rs7852741	0.06169	5.86	-0.941	102	102	blup	0.079	2.4e-08	-0.8361	0.4031
NA	./WEIGHTS//train_weights/Q16773.ENSG00000171097.wgt.RDat	ENSG00000171097.CCBL1	9	131595221	131644773	0.0849	rs17432839	-1.502	rs10760581	0.002262	-4.41	-0.082	65	65	blup	0.036	0.00012	0.8347	0.40388
NA	./WEIGHTS//train_weights/O43815.ENSG00000115808.wgt.RDat	ENSG00000115808.STRN	2	37070783	37193615	0.0561	rs2541009	-2.585	rs10495870	0.006521	3.99	0.571	129	129	blup	0.02	0.0033	0.8348	0.404
NA	./WEIGHTS//train_weights/Q8N608.ENSG00000175497.wgt.RDat	ENSG00000175497.DPP10	2	115199876	116603328	0.124	rs12621324	3.781	rs3738879	0.083974	-5.77	-1.222	577	6	lasso	0.093	9.1e-10	0.8346	0.404
NA	./WEIGHTS//train_weights/P14174.ENSG00000240972.wgt.RDat	ENSG00000240972.MIF	22	24236191	24237414	0.0992	rs9624364	-1.93	rs5760090	0.048468	5.5	0.621	112	7	lasso	0.086	4e-09	0.83509	0.404
NA	./WEIGHTS//train_weights/Q9P2X3.ENSG00000154059.wgt.RDat	ENSG00000154059.IMPACT	18	22006580	22033499	0.0465	rs12454148	3.21	rs9950490	7.38e-05	-3.2	-0.445	140	140	blup	0.026	0.00093	0.833	0.40458
NA	./WEIGHTS//train_weights/Q96MF6.ENSG00000135469.wgt.RDat	ENSG00000135469.COQ10A	12	56660642	56664750	0.0484	rs872103	-1.88	rs17118403	0.001617	2.95	0.096	42	42	bslmm	0.031	0.00063	-0.8333	0.405
NA	./WEIGHTS//train_weights/Q9UDT6.ENSG00000106665.wgt.RDat	ENSG00000106665.CLIP2	7	73703805	73820273	0.2064	rs37613	-2.47	rs10949838	0.054061	-4.78	-1.112	79	79	bslmm	0.074	5.5e-08	0.832	0.405
NA	./WEIGHTS//train_weights/Q6XQN6.ENSG00000147813.wgt.RDat	ENSG00000147813.NAPRT1	8	144656955	144660819	0.4628	rs4874156	-1.22	rs1809148	0.393015	-12.77	-0.81	81	4	lasso	0.5	4e-59	0.8321	0.405361
NA	./WEIGHTS//train_weights/Q9Y2W6.ENSG00000182134.wgt.RDat	ENSG00000182134.TDRKH	1	151742583	151763892	0.0491	rs3790508	-3.55	rs1054475	0.021395	-4.25	-1.195	95	95	blup	0.034	0.00018	0.8303	0.406
NA	./WEIGHTS//train_weights/Q8NBQ5.ENSG00000198189.wgt.RDat	ENSG00000198189.HSD17B11	4	88257762	88312538	0.0973	rs10024099	-2.94	rs3923442	0.00667	-4.36	1.254	87	20	enet	0.043	3e-05	0.8294	0.407
NA	./WEIGHTS//train_weights/Q8IV50.ENSG00000140280.wgt.RDat	ENSG00000140280.LYSMD2	15	52015208	52043782	0.0967	rs2305710	-1.65	rs16964505	0.04431	4.4	-0.828	100	1	top1	0.044	2.3e-05	-0.828	0.40767
NA	./WEIGHTS//train_weights/P22748.ENSG00000167434.wgt.RDat	ENSG00000167434.CA4	17	58227297	58248260	0.1492	rs9905484	-1.83	rs345189	0.131	-7.12	1.016	45	45	bslmm	0.14	3.5e-14	-0.82568	0.409
NA	./WEIGHTS//train_weights/Q969T7.ENSG00000141698.wgt.RDat	ENSG00000141698.NT5C3B	17	39981335	39992523	0.1682	rs4796691	2.74	rs7212972	0.173	8.16	0.822	94	1	top1	0.17	2.2e-17	0.822	0.411
NA	./WEIGHTS//train_weights/Q8IVH4.ENSG00000151611.wgt.RDat	ENSG00000151611.MMAA	4	146539415	146581187	0.3067	rs10003327	-2.47	rs17020467	0.2775	-10.29	0.586	81	81	bslmm	0.29	7.3e-30	-0.8225	0.411
NA	./WEIGHTS//train_weights/P29597.ENSG00000105397.wgt.RDat	ENSG00000105397.TYK2	19	10461209	10491352	0.2398	rs3093030	2.91	rs12720356	0.154368	-7.5	0.822	80	1	top1	0.15	1.9e-14	-0.822	0.4111
NA	./WEIGHTS//train_weights/P52888.ENSG00000172009.wgt.RDat	ENSG00000172009.THOP1	19	2785458	2813599	0.0247	rs10423135	2.9	rs12608998	0.012292	3.4	0.821	101	1	top1	0.012	0.018	0.821	0.4116
NA	./WEIGHTS//train_weights/Q9BTV4.ENSG00000170876.wgt.RDat	ENSG00000170876.TMEM43	3	14166440	14185179	0.1198	rs6762079	2.32	rs3796308	0.007372	-5.01	1.778	99	99	bslmm	0.0096	0.033	-0.821	0.41164
NA	./WEIGHTS//train_weights/P55290.ENSG00000140945.wgt.RDat	ENSG00000140945.CDH13	16	82660408	83830204	0.2503	rs9940524	3.89	rs9933518	0.0549	5.58	0.368	1385	1385	blup	0.1	2.1e-10	-0.81998	0.412
NA	./WEIGHTS//train_weights/Q9BXW7.ENSG00000069998.wgt.RDat	ENSG00000069998.CECR5	22	17618401	17646177	0.0862	rs737962	-2.43	rs1034859	0.077717	5.53	-0.821	129	1	top1	0.078	3.1e-08	-0.821	0.412
NA	./WEIGHTS//train_weights/A6NDU8.ENSG00000205765.wgt.RDat	ENSG00000205765.C5orf51	5	41904290	41921738	0.0443	rs13162569	-1.56	rs34663371	0.00366	3.26	-0.085	50	8	enet	0.011	0.022	0.8161	0.41444
NA	./WEIGHTS//train_weights/Q4V9L6.ENSG00000183160.wgt.RDat	ENSG00000183160.TMEM119	12	108983622	108992096	0.043	rs11113948	-1.98	rs7315286	0.044904	4.39	0.815	114	1	top1	0.045	5.8e-05	0.815	0.415
NA	./WEIGHTS//train_weights/P48047.ENSG00000241837.wgt.RDat	ENSG00000241837.ATP5O	21	35275757	35288284	0.0692	rs3746861	3.45	rs12482697	0.04765	-4.87	0.813	131	1	top1	0.048	1.2e-05	-0.813	0.4162
NA	./WEIGHTS//train_weights/Q01459.ENSG00000117151.wgt.RDat	ENSG00000117151.CTBS	1	85015289	85040163	0.0682	rs17366686	-3.25	rs7551329	0.00859	3.55	-0.078	114	114	blup	0.034	0.0014	-0.8118	0.417
NA	./WEIGHTS//train_weights/Q9H0R6.ENSG00000130348.wgt.RDat	ENSG00000130348.QRSL1	6	107077453	107116292	0.0926	rs11968442	-2.53	rs7750365	0.038116	-5.91	1.735	160	12	enet	0.076	3.4e-08	-0.8108	0.417
NA	./WEIGHTS//train_weights/Q12765.ENSG00000136193.wgt.RDat	ENSG00000136193.SCRN1	7	29959719	30029905	0.2078	rs174931	2.3	rs17324153	0.017462	-4.66	-0.519	117	17	enet	0.082	8.8e-09	0.8121	0.417
NA	./WEIGHTS//train_weights/Q9C0H2.ENSG00000136295.wgt.RDat	ENSG00000136295.TTYH3	7	2671585	2704436	0.1008	rs2917756	3.64	rs1105421	0.00097	3.55	0.839	121	20	enet	0.056	1.9e-06	0.8114	0.417
NA	./WEIGHTS//train_weights/P16435.ENSG00000127948.wgt.RDat	ENSG00000127948.POR	7	75528518	75616173	0.3728	rs8509	2.07	rs10954732	0.057851	5.05	0.577	73	14	enet	0.1	1.6e-10	0.8088	0.419
NA	./WEIGHTS//train_weights/Q9GZT6.ENSG00000137500.wgt.RDat	ENSG00000137500.CCDC90B	11	82970139	82997450	0.0502	rs553106	-1.8	rs481321	0.004352	-3.46	-0.097	70	13	enet	0.023	0.002	-0.80614	0.42016
NA	./WEIGHTS//train_weights/O96007.ENSG00000164172.wgt.RDat	ENSG00000164172.MOCS2	5	52391509	52405893	0.3129	rs30088	-3.15	rs3816326	0.221607	-9.19	0.717	148	148	bslmm	0.23	4.6e-22	-0.8061	0.42021
NA	./WEIGHTS//train_weights/P14550.ENSG00000117448.wgt.RDat	ENSG00000117448.AKR1A1	1	46016215	46035721	0.7187	rs781059	-2.12	rs2229540	0.348854	-11.57	0.805	80	1	top1	0.35	6e-37	-0.805	0.421
NA	./WEIGHTS//train_weights/Q96B45.ENSG00000166275.wgt.RDat	ENSG00000166275.C10orf32	10	104613980	104624718	0.0519	rs17115073	2.85	rs4919690	0.04012	-4.95	-0.553	85	85	blup	0.045	1.9e-05	0.80342	0.421732
NA	./WEIGHTS//train_weights/Q9BRF8.ENSG00000103381.wgt.RDat	ENSG00000103381.CPPED1	16	12756919	12897874	0.0883	rs7187496	2.96	rs17226949	-0.00262	3.38	1.033	269	269	blup	0.019	0.0045	0.80301	0.422
NA	./WEIGHTS//train_weights/Q8IYB7.ENSG00000144535.wgt.RDat	ENSG00000144535.DIS3L2	2	232825955	233209060	0.0738	rs2679163	-2.433	rs6760896	0.00567	4.16	0.046	211	211	bslmm	0.029	0.00054	-0.8034	0.422
NA	./WEIGHTS//train_weights/A1X283.ENSG00000174705.wgt.RDat	ENSG00000174705.SH3PXD2B	5	171752185	171881527	0.1601	rs11747598	-2.13	rs2731688	0.067445	5.98	0.918	161	161	bslmm	0.098	3.3e-10	0.8024	0.42232
NA	./WEIGHTS//train_weights/Q8TEM1.ENSG00000132182.wgt.RDat	ENSG00000132182.NUP210	3	13357737	13461809	0.0871	rs2002218	3.05	rs9874760	0.036483	4.05	-1.321	148	148	bslmm	0.043	3.1e-05	-0.8023	0.42237
NA	./WEIGHTS//train_weights/Q9Y4D7.ENSG00000004399.wgt.RDat	ENSG00000004399.PLXND1	3	129274018	129325661	0.1061	rs7612530	-2.88	rs746210	0.002627	-3.07	1.314	73	73	bslmm	0.037	9.5e-05	0.8009	0.42321
NA	./WEIGHTS//train_weights/Q2TAA2.ENSG00000134330.wgt.RDat	ENSG00000134330.IAH1	2	9613787	9636672	0.3169	rs10929588	1.264	rs10593	0.019723	-4.02	1.237	58	58	bslmm	0.077	2.7e-08	-0.7988	0.424
NA	./WEIGHTS//train_weights/Q567U6.ENSG00000125633.wgt.RDat	ENSG00000125633.CCDC93	2	118673054	118771709	0.056	rs6743665	-2.833	rs1547998	0.02374	-4.24	1.029	134	3	lasso	0.03	0.00046	-0.8	0.424
NA	./WEIGHTS//train_weights/P09622.ENSG00000091140.wgt.RDat	ENSG00000091140.DLD	7	107531415	107572175	0.032	rs4727688	2.51	rs2237690	0.011515	4.5	0.928	146	3	lasso	0.019	0.0042	0.7999	0.424
NA	./WEIGHTS//train_weights/Q9P0R6.ENSG00000100744.wgt.RDat	ENSG00000100744.GSKIP	14	96829814	96853625	0.0293	rs6575589	3.532	rs1899588	0.015317	4.02	1.443	91	91	bslmm	0.018	0.0058	0.799	0.4243
NA	./WEIGHTS//train_weights/Q96C19.ENSG00000142634.wgt.RDat	ENSG00000142634.EFHD2	1	15736391	15756839	0.0718	rs6675825	-2.29	rs12562864	0.002373	-3.91	0.501	99	99	blup	0.013	0.015	-0.7974	0.425
NA	./WEIGHTS//train_weights/A6NHG4.ENSG00000099974.wgt.RDat	ENSG00000099974.DDTL	22	24309089	24314721	0.3924	rs9624364	-1.93	rs4822466	0.25289	-10.13	0.037	74	18	enet	0.39	5e-42	0.79741	0.425
NA	./WEIGHTS//train_weights/Q13144.ENSG00000145191.wgt.RDat	ENSG00000145191.EIF2B5	3	183852826	184402546	0.0302	rs2231223	2.91	rs843369	0.009445	-3.82	-0.807	93	93	bslmm	0.0098	0.03	0.7975	0.42519
NA	./WEIGHTS//train_weights/Q9H223.ENSG00000103966.wgt.RDat	ENSG00000103966.EHD4	15	42190950	42264776	0.0569	rs7176475	2.23	rs11549015	0.03228	-4.66	-0.749	174	8	enet	0.037	0.00011	0.79616	0.42594
NA	./WEIGHTS//train_weights/Q9UMX5.ENSG00000117691.wgt.RDat	ENSG00000117691.NENF	1	212606229	212619714	0.042	rs11119928	-2.24	rs4804	0.049368	-5.2	-0.734	104	6	enet	0.054	4.2e-06	0.7964	0.426
NA	./WEIGHTS//train_weights/Q99766.ENSG00000125375.wgt.RDat	ENSG00000125375.ATP5S	14	50779044	50802276	0.3942	rs743076	-1.604	rs2356243	0.120258	-7.67	1.074	91	91	bslmm	0.2	5.8e-20	-0.796	0.426
NA	./WEIGHTS//train_weights/O15013.ENSG00000104728.wgt.RDat	ENSG00000104728.ARHGEF10	8	1772142	1906807	0.1197	rs4327894	-3.45	rs2977189	-0.000556	-3.45	1.528	264	67	enet	0.0068	0.067	-0.7956	0.42629
NA	./WEIGHTS//train_weights/P28070.ENSG00000159377.wgt.RDat	ENSG00000159377.PSMB4	1	151372010	151374420	0.2373	rs1752382	2	rs4603	0.458918	-13.13	0.795	52	1	top1	0.46	4.8e-52	-0.795	0.427
NA	./WEIGHTS//train_weights/P30046.ENSG00000099977.wgt.RDat	ENSG00000099977.DDT	22	24313554	24322660	0.3877	rs9624364	-1.93	rs4822466	0.279526	-10.26	0.037	71	20	enet	0.4	3.6e-43	0.79478	0.427
NA	./WEIGHTS//train_weights/P49590.ENSG00000112855.wgt.RDat	ENSG00000112855.HARS2	5	140071011	140078889	0.0315	rs2569163	2.17	rs778596	0.021767	3.54	-0.793	77	1	top1	0.022	0.0024	-0.793	0.42778
NA	./WEIGHTS//train_weights/P0CG30.ENSG00000133433.wgt.RDat	ENSG00000133433.GSTT2B	22	24299601	24303373	0.3444	rs9624364	-1.93	rs2739338	0.275055	10.16	0.179	75	19	enet	0.37	1.6e-39	-0.7898	0.43
NA	./WEIGHTS//train_weights/Q15334.ENSG00000131899.wgt.RDat	ENSG00000131899.LLGL1	17	18128901	18148189	0.0516	rs16960927	-2.3	rs4925159	0.0439	4.41	-0.784	101	1	top1	0.044	2.5e-05	-0.784	0.433
NA	./WEIGHTS//train_weights/Q5JRX3.ENSG00000107959.wgt.RDat	ENSG00000107959.PITRM1	10	3179920	3215003	0.348	rs11251814	-2.27	rs4880592	0.234221	-10.16	0.639	202	36	enet	0.43	2.2e-47	-0.78377	0.433174
NA	./WEIGHTS//train_weights/Q9NWS8.ENSG00000155906.wgt.RDat	ENSG00000155906.RMND1	6	151725989	151773259	0.2029	rs3734797	3.38	rs11550103	0.176004	-8.72	0.589	128	5	lasso	0.19	4.6e-19	-0.7831	0.434
NA	./WEIGHTS//train_weights/Q5VT25.ENSG00000143776.wgt.RDat	ENSG00000143776.CDC42BPA	1	227177566	227506175	0.0857	rs2802268	4.09	rs11804613	0.0628	5.35	0.78	280	1	top1	0.063	5.1e-07	0.78	0.435
NA	./WEIGHTS//train_weights/O75711.ENSG00000164106.wgt.RDat	ENSG00000164106.SCRG1	4	174305852	174327531	0.1691	rs4696055	2.68	rs7655786	0.13949	7.4	-0.928	55	4	lasso	0.15	1.1e-14	-0.7815	0.435
NA	./WEIGHTS//train_weights/P31937.ENSG00000106049.wgt.RDat	ENSG00000106049.HIBADH	7	27565061	27702614	0.2124	rs952255	-2.67	rs6957378	0.164611	8.23	0.316	120	32	enet	0.21	1.8e-21	0.7785	0.436
NA	./WEIGHTS//train_weights/O00194.ENSG00000041353.wgt.RDat	ENSG00000041353.RAB27B	18	52385091	52562747	0.114	rs4800977	-2.46	rs2871673	0.153	-7.92	1.279	93	19	enet	0.15	1.6e-15	-0.779	0.43605
NA	./WEIGHTS//train_weights/Q9UIQ6.ENSG00000113441.wgt.RDat	ENSG00000113441.LNPEP	5	96271098	96373219	0.0426	rs6884540	2.07	rs18059	0.021903	3.96	0.678	123	123	blup	0.028	0.00067	0.7785	0.43627
NA	./WEIGHTS//train_weights/Q9NQ79.ENSG00000095713.wgt.RDat	ENSG00000095713.CRTAC1	10	99624757	99790585	0.0991	rs2297935	2.27	rs7922066	0.085965	-5.83	1.48	169	13	enet	0.087	3.3e-09	-0.77824	0.436428
NA	./WEIGHTS//train_weights/O00533.ENSG00000134121.wgt.RDat	ENSG00000134121.CHL1	3	238279	451090	0.1727	rs9311359	-2.03	rs3956142	0.023859	5.7	-0.263	246	15	enet	0.13	1.2e-13	0.7775	0.43684
NA	./WEIGHTS//train_weights/Q16875.ENSG00000170525.wgt.RDat	ENSG00000170525.PFKFB3	10	6186881	6277495	0.1097	rs12777632	-3.9	rs4310524	-0.003802	-3.2	-0.22	166	166	blup	0.039	0.00079	-0.77524	0.438195
NA	./WEIGHTS//train_weights/Q9BUP3.ENSG00000109854.wgt.RDat	ENSG00000109854.HTATIP2	11	20385231	20405329	0.0884	rs16906172	3.78	rs10833312	0.023431	-4.49	0.308	108	12	enet	0.055	2.8e-06	-0.77459	0.43858
NA	./WEIGHTS//train_weights/P57088.ENSG00000109133.wgt.RDat	ENSG00000109133.TMEM33	4	41937137	41962589	0.0431	rs7693854	-2.73	rs6821891	0.03842	-4.19	-0.773	77	1	top1	0.038	7.7e-05	0.773	0.44
NA	./WEIGHTS//train_weights/Q6IPR1.ENSG00000205707.wgt.RDat	ENSG00000205707.LYRM5	12	25348150	25362579	0.0578	rs7316187	2.67	rs11047887	0.051168	4.82	-0.633	102	102	bslmm	0.06	5.4e-05	-0.7708	0.441
NA	./WEIGHTS//train_weights/O76070.ENSG00000173267.wgt.RDat	ENSG00000173267.SNCG	10	88718375	88723017	0.1433	rs1745901	-2.75	rs1240390	0.073077	-5.79	-0.505	58	2	lasso	0.085	4.9e-09	0.77012	0.441229
NA	./WEIGHTS//train_weights/Q9NPQ8.ENSG00000177963.wgt.RDat	ENSG00000177963.RIC8A	11	207511	215113	0.1281	rs4758635	-1.83	rs2272566	0.005235	4.48	0.833	98	98	blup	0.057	1.6e-06	0.76856	0.44215
NA	./WEIGHTS//train_weights/P45954.ENSG00000196177.wgt.RDat	ENSG00000196177.ACADSB	10	124768495	124817827	0.0554	rs10902861	2.23	rs7894710	0.021005	-4.2	0.768	131	1	top1	0.021	0.0028	-0.768	0.442487
NA	./WEIGHTS//train_weights/Q8N8A6.ENSG00000185163.wgt.RDat	ENSG00000185163.DDX51	12	132621139	132628880	0.0364	rs7399344	2.44	rs11831480	0.001622	3.22	-0.231	87	87	blup	0.013	0.046	0.7673	0.443
NA	./WEIGHTS//train_weights/Q96T51.ENSG00000176783.wgt.RDat	ENSG00000176783.RUFY1	5	178977559	179037027	0.0524	rs4701187	-3.07	rs4563584	0.004767	3.37	-1.034	93	93	bslmm	0.021	0.0028	-0.7658	0.44377
NA	./WEIGHTS//train_weights/Q9UKF7.ENSG00000154217.wgt.RDat	ENSG00000154217.PITPNC1	17	65373575	65693372	0.0725	rs11652004	-2.9	rs12601587	0.00778	-3.74	-0.763	193	1	top1	0.0078	0.048	0.763	0.445
NA	./WEIGHTS//train_weights/Q13508.ENSG00000156219.wgt.RDat	ENSG00000156219.ART3	4	76932337	77033955	0.1034	rs11946079	3.57	rs884304	0.03467	-4.54	-0.101	173	173	blup	0.062	9.7e-07	0.7615	0.446
NA	./WEIGHTS//train_weights/Q9HD42.ENSG00000131165.wgt.RDat	ENSG00000131165.CHMP1A	16	89710839	89724253	0.0468	rs8062346	2.06	rs164749	0.00931	-4	0.258	87	87	blup	0.036	0.00012	0.76047	0.447
NA	./WEIGHTS//train_weights/P35573.ENSG00000162688.wgt.RDat	ENSG00000162688.AGL	1	100315640	100389579	0.4781	rs6663234	-1.66	rs1541044	0.261493	-10.68	-1.535	137	137	blup	0.32	4.6e-33	0.7595	0.448
NA	./WEIGHTS//train_weights/Q9HD20.ENSG00000105726.wgt.RDat	ENSG00000105726.ATP13A1	19	19756007	19774502	0.0932	rs247796	-2.44	rs2304130	0.080577	5.93	-0.758	94	1	top1	0.081	1.3e-08	-0.758	0.4485
NA	./WEIGHTS//train_weights/P49619.ENSG00000058866.wgt.RDat	ENSG00000058866.DGKG	3	185823457	186080026	0.0775	rs4686734	3.75	rs1004589	0.007689	3.73	0.678	201	201	bslmm	0.022	0.0025	0.7572	0.44891
NA	./WEIGHTS//train_weights/Q9HBH1.ENSG00000258429.wgt.RDat	ENSG00000258429.PDF	16	69362524	69364498	0.078	rs2310818	1.69	rs877534	0.0726	5.68	0.755	65	1	top1	0.073	6.7e-08	0.755	0.45
NA	./WEIGHTS//train_weights/Q5VT66.ENSG00000186205.wgt.RDat	ENSG00000186205.MARC1	1	220960101	220987735	0.1944	rs2784252	2.16	rs2642442	0.128604	-7.16	0.753	136	1	top1	0.13	4.5e-13	-0.753	0.451
NA	./WEIGHTS//train_weights/O95294.ENSG00000111344.wgt.RDat	ENSG00000111344.RASAL1	12	113536624	113574044	0.0522	rs7979969	2.21	rs1902955	0.002982	-2.82	0.084	87	87	bslmm	0.016	0.0079	-0.7524	0.452
NA	./WEIGHTS//train_weights/Q496J9.ENSG00000122012.wgt.RDat	ENSG00000122012.SV2C	5	75378997	75649764	0.0506	rs2972853	3.44	rs4490566	0.030718	4.62	0.751	229	1	top1	0.031	0.00043	0.751	0.45265
NA	./WEIGHTS//train_weights/Q8WV93.ENSG00000135537.wgt.RDat	ENSG00000135537.LACE1	6	108616098	108847999	0.0556	rs9486893	-3.48	rs9372187	0.013402	-3.48	-0.116	115	115	blup	0.018	0.0058	0.7512	0.453
NA	./WEIGHTS//train_weights/Q7Z406.ENSG00000105357.wgt.RDat	ENSG00000105357.MYH14	19	50691443	50813802	0.1239	rs635719	-2.39	rs588973	0.022899	4.34	-0.602	104	2	lasso	0.053	4e-06	-0.7493	0.4537
NA	./WEIGHTS//train_weights/P05413.ENSG00000121769.wgt.RDat	ENSG00000121769.FABP3	1	31838472	31849697	0.0514	rs11578034	1.86	rs10493047	0.047565	-5.11	-0.748	92	1	top1	0.048	1.2e-05	0.748	0.454
NA	./WEIGHTS//train_weights/P15531.ENSG00000239672.wgt.RDat	ENSG00000239672.NME1	17	49230897	49239789	0.3433	rs41524846	2.17	rs16949649	0.238	9.63	1.453	67	10	enet	0.25	1.1e-25	0.74731	0.455
NA	./WEIGHTS//train_weights/Q06124.ENSG00000179295.wgt.RDat	ENSG00000179295.PTPN11	12	112856155	112947717	0.0303	rs233719	-2.65	rs10850031	0.020039	4.05	0.212	58	58	blup	0.025	0.0012	-0.7442	0.457
NA	./WEIGHTS//train_weights/Q9UBM7.ENSG00000172893.wgt.RDat	ENSG00000172893.DHCR7	11	71139239	71163914	0.0302	rs12285140	-2.67	rs12422045	0.01598	-3.83	-1.064	152	3	lasso	0.024	0.0017	0.74121	0.45856
NA	./WEIGHTS//train_weights/Q96LJ7.ENSG00000157379.wgt.RDat	ENSG00000157379.DHRS1	14	24759804	24769039	0.5246	rs6573766	3.109	rs10134537	0.117021	-7.11	0.906	120	18	lasso	0.33	6.5e-34	-0.7407	0.4589
NA	./WEIGHTS//train_weights/Q16527.ENSG00000175183.wgt.RDat	ENSG00000175183.CSRP2	12	77252495	77272840	0.0565	rs17813975	3.27	rs1962167	0.053467	-4.61	0.738	101	1	top1	0.053	3.5e-06	-0.738	0.461
NA	./WEIGHTS//train_weights/Q86VW0.ENSG00000187231.wgt.RDat	ENSG00000187231.SESTD1	2	179966419	180129517	0.0291	rs12474600	2.013	rs17454311	0.009827	-3.74	0.737	133	1	top1	0.0098	0.03	-0.737	0.461
NA	./WEIGHTS//train_weights/O60669.ENSG00000118596.wgt.RDat	ENSG00000118596.SLC16A7	12	59989848	60176395	0.1266	rs7976956	3.02	rs10506399	0.103938	-6.59	0.734	124	1	top1	0.1	9.2e-11	-0.734	0.463
NA	./WEIGHTS//train_weights/Q6IA86.ENSG00000134759.wgt.RDat	ENSG00000134759.ELP2	18	33709407	33757909	0.0424	rs12457209	2.73	rs1789512	0.0586	-5.07	0.732	130	1	top1	0.059	1.2e-06	-0.732	0.46417
NA	./WEIGHTS//train_weights/Q8WVD5.ENSG00000110315.wgt.RDat	ENSG00000110315.RNF141	11	10533225	10562777	0.1627	rs7948666	4.13	rs1993819	0.111595	7.62	-0.357	145	26	enet	0.16	7.5e-16	-0.73126	0.46462
NA	./WEIGHTS//train_weights/Q8NFV4.ENSG00000106077.wgt.RDat	ENSG00000106077.ABHD11	7	73150424	73153197	0.1849	rs17401675	-2.66	rs6460052	0.159372	8.16	0.776	73	3	lasso	0.18	2.6e-18	0.7305	0.465
NA	./WEIGHTS//train_weights/O43516.ENSG00000115935.wgt.RDat	ENSG00000115935.WIPF1	2	175424300	175547644	0.065	rs1376874	2.437	rs1010027	0.009428	-3.57	1.145	105	105	blup	0.03	0.0012	-0.729	0.466
NA	./WEIGHTS//train_weights/P28331.ENSG00000023228.wgt.RDat	ENSG00000023228.NDUFS1	2	206979541	207024327	0.0206	rs17289237	1.591	rs818018	0.021747	3.6	1.53	91	7	enet	0.028	0.00067	0.7289	0.466
NA	./WEIGHTS//train_weights/Q9NZC7.ENSG00000186153.wgt.RDat	ENSG00000186153.WWOX	16	78133310	79246564	0.24	rs8047442	3.34	rs7184686	0.0627	6.28	0.388	1240	3	lasso	0.2	6.3e-20	0.72817	0.467
NA	./WEIGHTS//train_weights/Q08357.ENSG00000168575.wgt.RDat	ENSG00000168575.SLC20A2	8	42273993	42397069	0.0638	rs3136711	-1.46	rs2923428	0.074519	5.67	0.727	96	1	top1	0.075	5.9e-08	0.727	0.467226
NA	./WEIGHTS//train_weights/O75936.ENSG00000129151.wgt.RDat	ENSG00000129151.BBOX1	11	27062272	27149356	0.2014	rs16925449	2.04	rs7106917	0.120815	6.78	-1.04	140	140	bslmm	0.18	1.2e-17	-0.72433	0.46886
NA	./WEIGHTS//train_weights/Q06830.ENSG00000117450.wgt.RDat	ENSG00000117450.PRDX1	1	45976708	45988719	0.2862	rs1691217	-2.17	rs17410855	0.00151	3.57	-0.684	78	11	enet	0.049	9.2e-06	-0.7248	0.469
NA	./WEIGHTS//train_weights/Q9Y6I9.ENSG00000164081.wgt.RDat	ENSG00000164081.TEX264	3	51696709	51738339	0.0451	rs6764588	1.31	rs12330652	0.001987	-4.24	1.271	24	3	lasso	0.027	0.00081	-0.7216	0.47051
NA	./WEIGHTS//train_weights/P46940.ENSG00000140575.wgt.RDat	ENSG00000140575.IQGAP1	15	90931450	91045475	0.1323	rs7182610	2.72	rs17176602	0.0283	4.49	-0.499	141	6	lasso	0.042	3.7e-05	-0.72113	0.47083
NA	./WEIGHTS//train_weights/Q96RR4.ENSG00000110931.wgt.RDat	ENSG00000110931.CAMKK2	12	121675497	121736111	0.1432	rs208305	3.01	rs3794207	0.025054	4.03	0.143	125	34	enet	0.054	3.1e-06	-0.7202	0.471
NA	./WEIGHTS//train_weights/P30533.ENSG00000163956.wgt.RDat	ENSG00000163956.LRPAP1	4	3508103	3534286	0.0925	rs2699416	1.86	rs7672287	0.0682	6.13	-0.732	87	5	lasso	0.088	3e-09	-0.7207	0.471
NA	./WEIGHTS//train_weights/P15151.ENSG00000073008.wgt.RDat	ENSG00000073008.PVR	19	45147098	45166850	0.1387	rs12977854	-2.25	rs714948	0.026395	-4.7	-0.066	86	5	lasso	0.086	8.6e-09	0.7198	0.4716
NA	./WEIGHTS//train_weights/Q5VWZ2.ENSG00000143353.wgt.RDat	ENSG00000143353.LYPLAL1	1	219347186	219386207	0.1385	rs2186258	2.81	rs6699816	0.189566	8.51	0.718	85	1	top1	0.19	4.8e-19	0.718	0.473
NA	./WEIGHTS//train_weights/P42858.ENSG00000197386.wgt.RDat	ENSG00000197386.HTT	4	3076408	3245676	0.0347	rs1024323	3.02	rs2857839	-0.00264	3.42	0.309	138	138	bslmm	0.015	0.011	0.7145	0.475
NA	./WEIGHTS//train_weights/Q9UEY8.ENSG00000148700.wgt.RDat	ENSG00000148700.ADD3	10	111756126	111895323	0.0205	rs11195025	-2.04	rs12263484	0.015545	3.51	-0.714	79	1	top1	0.016	0.0089	-0.714	0.475227
NA	./WEIGHTS//train_weights/Q9NUI1.ENSG00000242612.wgt.RDat	ENSG00000242612.DECR2	16	451826	462487	0.1312	rs7205963	-2.62	rs1698231	0.082	6.24	-0.28	99	8	enet	0.095	8.9e-10	-0.71231	0.476
NA	./WEIGHTS//train_weights/P12694.ENSG00000248098.wgt.RDat	ENSG00000248098.BCKDHA	19	41884215	41930910	0.1166	rs2241715	1.85	rs4803464	0.011634	3.28	-0.5	68	68	bslmm	0.029	0.00054	0.7122	0.4764
NA	./WEIGHTS//train_weights/P09960.ENSG00000111144.wgt.RDat	ENSG00000111144.LTA4H	12	96394606	96437298	0.0514	rs7976535	1.74	rs6538697	0.015339	-3.7	-0.702	157	157	bslmm	0.019	0.0047	0.7095	0.478
NA	./WEIGHTS//train_weights/P49720.ENSG00000108294.wgt.RDat	ENSG00000108294.PSMB3	17	36908989	36920484	0.5762	rs2302472	2.68	rs764190	0.173	-8.32	-0.422	74	24	enet	0.24	1.1e-24	0.70875	0.478
NA	./WEIGHTS//train_weights/O00423.ENSG00000066629.wgt.RDat	ENSG00000066629.EML1	14	100204030	100408397	0.1067	rs7157032	-3.033	rs9324014	0.031254	-5.02	-0.697	155	155	blup	0.085	5.1e-09	0.7087	0.4785
NA	./WEIGHTS//train_weights/Q8N5I9.ENSG00000151131.wgt.RDat	ENSG00000151131.C12orf45	12	105380088	105443515	0.0901	rs11112347	-3.11	rs10861313	0.044798	-5.38	0.817	102	7	enet	0.09	5e-08	-0.7064	0.48
NA	./WEIGHTS//train_weights/O75503.ENSG00000102805.wgt.RDat	ENSG00000102805.CLN5	13	77564795	77576652	0.0731	rs432845	3.46	rs593502	0.015282	-4.1	0.744	96	96	bslmm	0.019	0.013	-0.706	0.4802
NA	./WEIGHTS//train_weights/Q92947.ENSG00000105607.wgt.RDat	ENSG00000105607.GCDH	19	13001840	13025021	0.2828	rs1205171	1.23	rs8012	0.148999	-7.68	-0.381	64	64	bslmm	0.17	1.5e-17	0.705	0.4808
NA	./WEIGHTS//train_weights/O14772.ENSG00000254685.wgt.RDat	ENSG00000254685.FPGT	1	74663896	74699770	0.0861	rs17524893	-3.22	rs11806946	0.091612	-6.77	1.814	54	11	lasso	0.12	7.3e-12	-0.7045	0.481
NA	./WEIGHTS//train_weights/Q14258.ENSG00000121060.wgt.RDat	ENSG00000121060.TRIM25	17	54965270	54991399	0.0753	rs8065197	1.89	rs2525994	0.0718	-5.57	0.704	73	1	top1	0.072	8e-08	-0.704	0.481
NA	./WEIGHTS//train_weights/Q96NN9.ENSG00000183773.wgt.RDat	ENSG00000183773.AIFM3	22	21319396	21335649	0.0834	rs178285	-1.91	rs178280	0.018541	-3.88	1.024	135	135	bslmm	0.022	0.0025	-0.70305	0.482
NA	./WEIGHTS//train_weights/Q6P1N9.ENSG00000147687.wgt.RDat	ENSG00000147687.TATDN1	8	125500726	125551699	0.0516	rs4620270	2.78	rs3829038	0.012454	-3.69	-0.332	134	134	bslmm	0.019	0.0045	-0.7028	0.482162
NA	./WEIGHTS//train_weights/P46952.ENSG00000162882.wgt.RDat	ENSG00000162882.HAAO	2	42994229	43019733	0.0556	rs6729750	2.183	rs2278582	0.028773	-4.3	0.701	123	1	top1	0.029	0.0067	-0.701	0.483
NA	./WEIGHTS//train_weights/Q9H6L2.ENSG00000205084.wgt.RDat	ENSG00000205084.TMEM231	16	75572015	75590184	0.0537	rs16941008	1.74	rs8061183	-0.000615	-3.81	0.925	93	93	blup	0.033	0.002	-0.69975	0.484
NA	./WEIGHTS//train_weights/Q9BSQ5.ENSG00000136280.wgt.RDat	ENSG00000136280.CCM2	7	45039074	45116068	0.0924	rs10264280	-2.45	rs6463263	-0.00036	3.42	0.31	122	122	bslmm	0.033	0.00023	0.6997	0.484
NA	./WEIGHTS//train_weights/Q96EK5.ENSG00000198954.wgt.RDat	ENSG00000198954.KIAA1279	10	70748487	70776738	0.0906	rs17557564	1.88	rs2491015	0.097998	-6.4	-0.698	93	1	top1	0.098	3.2e-10	0.698	0.485177
NA	./WEIGHTS//train_weights/O60343.ENSG00000136111.wgt.RDat	ENSG00000136111.TBC1D4	13	75858808	76056250	0.1	rs576810	-2.93	rs1570541	0.006744	-4.05	-0.229	222	222	bslmm	0.048	1.1e-05	0.698	0.4852
NA	./WEIGHTS//train_weights/O95363.ENSG00000145982.wgt.RDat	ENSG00000145982.FARS2	6	5261277	5771813	0.0947	rs2503813	2.67	rs9504370	0.068013	-5.2	-0.695	411	1	top1	0.068	2.2e-07	0.695	0.487
NA	./WEIGHTS//train_weights/Q9HD34.ENSG00000214113.wgt.RDat	ENSG00000214113.LYRM4	6	5102827	5261172	0.2597	rs2746242	-2.13	rs9504370	0.307416	-10.9	-0.695	218	1	top1	0.31	6.6e-32	0.695	0.487
NA	./WEIGHTS//train_weights/P49419.ENSG00000164904.wgt.RDat	ENSG00000164904.ALDH7A1	5	125877533	125931110	0.1208	rs7701889	2.51	rs17154676	0.054708	4.8	-0.486	129	129	bslmm	0.082	9.1e-09	-0.694	0.48766
NA	./WEIGHTS//train_weights/Q16623.ENSG00000106089.wgt.RDat	ENSG00000106089.STX1A	7	73113536	73134002	0.026	rs17401675	-2.66	rs941299	0.019163	3.68	0.693	74	1	top1	0.019	0.0041	0.693	0.488
NA	./WEIGHTS//train_weights/P30566.ENSG00000239900.wgt.RDat	ENSG00000239900.ADSL	22	40742507	40786467	0.0811	rs8135759	-1.97	rs8135371	0.082173	5.88	-0.657	64	2	lasso	0.087	3.2e-09	-0.69265	0.489
NA	./WEIGHTS//train_weights/Q9BXM9.ENSG00000106701.wgt.RDat	ENSG00000106701.FSD1L	9	108210077	108314714	0.064	rs3199966	2.921	rs12555267	0.015321	-4.04	0.286	95	95	blup	0.044	2.5e-05	-0.6918	0.48907
NA	./WEIGHTS//train_weights/Q9Y617.ENSG00000135069.wgt.RDat	ENSG00000135069.PSAT1	9	80912059	80945009	0.1621	rs2989577	-2.381	rs1929402	0.073063	-5.76	-0.967	99	5	lasso	0.074	5.3e-08	0.6911	0.4895
NA	./WEIGHTS//train_weights/Q8NBX0.ENSG00000143653.wgt.RDat	ENSG00000143653.SCCPDH	1	246887349	246931439	0.1159	rs6669532	-2	rs10924826	0.017744	-4.36	-0.753	126	126	blup	0.059	1.2e-06	0.6911	0.49
NA	./WEIGHTS//train_weights/Q9BXK5.ENSG00000099968.wgt.RDat	ENSG00000099968.BCL2L13	22	18111621	18213388	0.1088	rs5992834	-2.45	rs2535708	0.073514	-6.34	0.422	149	6	lasso	0.14	7.8e-14	-0.68996	0.49
NA	./WEIGHTS//train_weights/O95278.ENSG00000112425.wgt.RDat	ENSG00000112425.EPM2A	6	145822719	146057160	0.1535	rs11155431	1.19	rs702322	0.033556	-3.9	-0.69	74	1	top1	0.034	0.00021	0.69	0.49
NA	./WEIGHTS//train_weights/Q8NBN7.ENSG00000160439.wgt.RDat	ENSG00000160439.RDH13	19	55550476	55582659	0.1301	rs1654467	-2.59	rs1671169	0.016739	-5.21	-0.521	116	116	blup	0.063	5.4e-07	-0.6895	0.4905
NA	./WEIGHTS//train_weights/Q6P2I3.ENSG00000144199.wgt.RDat	ENSG00000144199.FAHD2B	2	97749320	97760619	0.1756	rs10496325	-1.088	rs1257084	0.07115	-5.21	-0.652	18	5	enet	0.11	4.3e-07	0.6891	0.491
NA	./WEIGHTS//train_weights/Q04609.ENSG00000086205.wgt.RDat	ENSG00000086205.FOLH1	11	49168187	49230222	0.0596	rs1164689	-2.9	rs10839239	0.025679	4.37	-0.147	59	5	lasso	0.049	1.1e-05	-0.6884	0.4912
NA	./WEIGHTS//train_weights/Q16610.ENSG00000143369.wgt.RDat	ENSG00000143369.ECM1	1	150480538	150486265	0.0486	rs6698495	-1.81	rs698916	0.064055	-5.29	-0.687	53	1	top1	0.064	7.8e-07	0.687	0.492
NA	./WEIGHTS//train_weights/P11217.ENSG00000068976.wgt.RDat	ENSG00000068976.PYGM	11	64513861	64527769	0.1166	rs677298	1.48	rs624975	0.030803	-4.5	0.757	66	66	bslmm	0.055	2.3e-06	-0.685	0.49334
NA	./WEIGHTS//train_weights/A4D2B0.ENSG00000214309.wgt.RDat	ENSG00000214309.MBLAC1	7	99724317	99726118	0.2946	rs2285886	-1.2	rs2307355	0.261969	-10.45	-0.775	72	72	bslmm	0.28	8.7e-28	0.6838	0.494
NA	./WEIGHTS//train_weights/P55957.ENSG00000015475.wgt.RDat	ENSG00000015475.BID	22	18216906	18257536	0.0382	rs2587113	-2.49	rs181392	0.010659	-3.74	-0.417	132	132	blup	0.02	0.0048	0.68147	0.496
NA	./WEIGHTS//train_weights/Q9NZ45.ENSG00000122873.wgt.RDat	ENSG00000122873.CISD1	10	60028818	60049346	0.0368	rs17710296	2.81	rs714113	0.033361	4.16	-0.68	88	1	top1	0.033	0.00022	-0.68	0.496504
NA	./WEIGHTS//train_weights/O75069.ENSG00000133069.wgt.RDat	ENSG00000133069.TMCC2	1	205197304	205242471	0.0499	rs17728	3.04	rs1180734	0.041929	-4.96	-0.679	114	1	top1	0.042	3.7e-05	0.679	0.497
NA	./WEIGHTS//train_weights/C9J798.ENSG00000170667.wgt.RDat	ENSG00000170667.RASA4B	7	102122892	102158228	0.0562	rs1131383	-2.04	rs11487069	0.0142	-3.65	0.272	39	4	lasso	0.032	0.00038	-0.6797	0.497
NA	./WEIGHTS//train_weights/P48637.ENSG00000100983.wgt.RDat	ENSG00000100983.GSS	20	33516236	33543620	0.04	rs17092148	-2.67	rs2236271	0.037095	-5.03	0.382	78	78	blup	0.043	3.2e-05	-0.679	0.4973
NA	./WEIGHTS//train_weights/Q9UL12.ENSG00000123453.wgt.RDat	ENSG00000123453.SARDH	9	136528682	136605077	0.0761	rs9409864	-2.683	rs2097628	0.027839	4.72	0.416	181	15	enet	0.047	1.7e-05	0.6782	0.49764
NA	./WEIGHTS//train_weights/O75915.ENSG00000144746.wgt.RDat	ENSG00000144746.ARL6IP5	3	69134095	69155217	0.0851	rs7612705	-3.04	rs11128111	0.019279	4.57	-1.361	74	8	enet	0.038	7.8e-05	0.678	0.49774
NA	./WEIGHTS//train_weights/P0CG29.ENSG00000099984.wgt.RDat	ENSG00000099984.GSTT2	22	24322339	24326106	0.3713	rs9624364	-1.93	rs2739338	0.275037	10.15	0.179	71	21	enet	0.38	1.3e-40	-0.67694	0.498
NA	./WEIGHTS//train_weights/P09913.ENSG00000119922.wgt.RDat	ENSG00000119922.IFIT2	10	91061712	91069033	0.0448	rs4934464	2.42	rs1727	0.032546	-3.65	-0.676	111	1	top1	0.033	0.00054	0.676	0.499041
NA	./WEIGHTS//train_weights/Q15436.ENSG00000100934.wgt.RDat	ENSG00000100934.SEC23A	14	39501123	39578850	0.0519	rs958160	-1.634	rs2277458	0.042313	4.4	-0.673	98	1	top1	0.042	3.5e-05	-0.673	0.5009
NA	./WEIGHTS//train_weights/Q9UJD0.ENSG00000117016.wgt.RDat	ENSG00000117016.RIMS3	1	41086351	41131329	0.0613	rs12564167	-2.18	rs11803654	0.029352	4.02	-0.673	106	1	top1	0.029	0.0005	-0.673	0.501
NA	./WEIGHTS//train_weights/P08294.ENSG00000109610.wgt.RDat	ENSG00000109610.SOD3	4	24791534	24802464	0.1204	rs941265	3.7	rs699473	0.09355	6.24	-0.673	101	1	top1	0.094	1.2e-09	-0.673	0.501
NA	./WEIGHTS//train_weights/Q9H6S3.ENSG00000177106.wgt.RDat	ENSG00000177106.EPS8L2	11	694438	727727	0.2669	rs12805435	2.43	rs11246286	0.110588	5.84	0.672	109	1	top1	0.11	2.7e-09	0.672	0.50158
NA	./WEIGHTS//train_weights/P00533.ENSG00000146648.wgt.RDat	ENSG00000146648.EGFR	7	55086714	55324313	0.0815	rs845558	3.12	rs759159	0.002072	-4.44	-2.008	198	198	blup	0.038	8e-05	0.6719	0.502
NA	./WEIGHTS//train_weights/Q9H1C7.ENSG00000120306.wgt.RDat	ENSG00000120306.CYSTM1	5	139554227	139661637	0.0928	rs7737543	2.47	rs269782	0.1315	-6.81	0.668	74	1	top1	0.13	1.9e-11	-0.668	0.50413
NA	./WEIGHTS//train_weights/Q96BW9.ENSG00000144559.wgt.RDat	ENSG00000144559.TAMM41	3	11831916	11888393	0.2714	rs389780	3.32	rs402731	0.314135	-10.84	0.143	139	22	enet	0.35	1e-36	-0.6674	0.50453
NA	./WEIGHTS//train_weights/Q8WU10.ENSG00000121350.wgt.RDat	ENSG00000121350.PYROXD1	12	21590549	21623300	0.0685	rs12818296	2.76	rs4762836	0.016011	-3.4	-0.626	173	173	bslmm	0.036	0.0011	0.6651	0.506
NA	./WEIGHTS//train_weights/P12429.ENSG00000138772.wgt.RDat	ENSG00000138772.ANXA3	4	79472673	79531597	0.1343	rs753752	-1.88	rs1472365	0.01277	3.64	-0.141	149	149	bslmm	0.067	2e-07	-0.6647	0.506
NA	./WEIGHTS//train_weights/Q9Y394.ENSG00000100612.wgt.RDat	ENSG00000100612.DHRS7	14	60610838	60636574	0.0527	rs10151922	2.215	rs441282	0.081215	-5.83	0.665	79	1	top1	0.081	1.1e-08	-0.665	0.5061
NA	./WEIGHTS//train_weights/Q8NI37.ENSG00000196850.wgt.RDat	ENSG00000196850.PPTC7	12	110969120	111021125	0.0545	rs12831873	1.51	rs1502337	0.027733	-4.61	0.067	50	11	enet	0.034	0.00019	0.6639	0.507
NA	./WEIGHTS//train_weights/Q15173.ENSG00000068971.wgt.RDat	ENSG00000068971.PPP2R5B	11	64685025	64701945	0.0267	rs733303	3	rs650506	0.022471	-3.81	-0.663	71	1	top1	0.022	0.0021	0.663	0.50733
NA	./WEIGHTS//train_weights/Q96SZ5.ENSG00000181915.wgt.RDat	ENSG00000181915.ADO	10	64564516	64568238	0.1265	rs7088266	2.66	rs10995307	0.150815	-8.05	-0.335	104	104	blup	0.15	3.3e-15	0.66247	0.507671
NA	./WEIGHTS//train_weights/Q8IXS6.ENSG00000243444.wgt.RDat	ENSG00000243444.PALM2	9	112403068	112713755	0.051	rs10980068	3.412	rs12684676	0.042357	4.78	0.662	321	1	top1	0.042	3.4e-05	0.662	0.50797
NA	./WEIGHTS//train_weights/Q7Z6B0.ENSG00000123106.wgt.RDat	ENSG00000123106.CCDC91	12	28286182	28732883	0.2816	rs11049559	-2.31	rs1133028	0.047702	-6.38	0.199	127	5	lasso	0.17	2.8e-16	0.6602	0.509
NA	./WEIGHTS//train_weights/A8MU93.ENSG00000256806.wgt.RDat	ENSG00000256806.AC004706.1	17	6555059	6556617	0.0501	rs1983177	3.19	rs218663	0.035	-4.25	0.661	119	1	top1	0.035	0.00048	-0.661	0.509
NA	./WEIGHTS//train_weights/P54920.ENSG00000105402.wgt.RDat	ENSG00000105402.NAPA	19	47990894	48018497	0.0734	rs11878780	2.27	rs2974238	0.033889	4.45	0.76	81	6	lasso	0.037	0.00011	0.6572	0.5111
NA	./WEIGHTS//train_weights/O14994.ENSG00000185666.wgt.RDat	ENSG00000185666.SYN3	22	32908539	33454358	0.1969	rs5754249	-2.29	rs10483168	0.136284	-7.32	-0.973	516	4	lasso	0.2	1.3e-19	0.65632	0.512
NA	./WEIGHTS//train_weights/Q8N8R3.ENSG00000197119.wgt.RDat	ENSG00000197119.SLC25A29	14	100757448	100772884	0.0474	rs1951519	-2.742	rs1059263	0.042346	4.57	0.654	73	1	top1	0.042	6.7e-05	0.654	0.5131
NA	./WEIGHTS//train_weights/A1L188.ENSG00000224877.wgt.RDat	ENSG00000224877.C17orf89	17	79213039	79215081	0.0666	rs885362	2.54	rs7223219	0.00339	3.8	0.226	88	88	blup	0.013	0.022	0.65258	0.514
NA	./WEIGHTS//train_weights/P46063.ENSG00000004700.wgt.RDat	ENSG00000004700.RECQL	12	21621845	21654603	0.1339	rs12818296	2.76	rs7295965	0.018302	-4.86	-0.487	166	166	blup	0.054	2.9e-06	0.6505	0.515
NA	./WEIGHTS//train_weights/Q96AN5.ENSG00000161558.wgt.RDat	ENSG00000161558.TMEM143	19	48835613	48867494	0.1067	rs4802457	-2.25	rs34997741	0.000896	2.72	0.196	112	112	bslmm	0.023	0.002	-0.6495	0.516
NA	./WEIGHTS//train_weights/P15882.ENSG00000128656.wgt.RDat	ENSG00000128656.CHN1	2	175664091	175870097	0.0323	rs1376874	2.437	rs3856435	0.008349	3.84	-0.648	140	8	enet	0.017	0.0061	-0.6494	0.516
NA	./WEIGHTS//train_weights/Q9BWD1.ENSG00000120437.wgt.RDat	ENSG00000120437.ACAT2	6	160181360	160200144	0.0307	rs12204454	-2.02	rs1440	0.009805	3.72	-0.19	91	91	bslmm	0.017	0.0068	-0.6498	0.516
NA	./WEIGHTS//train_weights/Q8N9F7.ENSG00000153982.wgt.RDat	ENSG00000153982.GDPD1	17	57297828	57353328	0.0526	rs7212846	-1.9	rs11079369	0.064	5.45	-0.646	80	1	top1	0.064	4e-07	-0.646	0.518
NA	./WEIGHTS//train_weights/O75391.ENSG00000091640.wgt.RDat	ENSG00000091640.SPAG7	17	4862521	4871167	0.1155	rs17633650	2.54	rs16942615	0.109	6.37	-0.645	92	1	top1	0.11	7.3e-11	-0.645	0.519
NA	./WEIGHTS//train_weights/O75140.ENSG00000100150.wgt.RDat	ENSG00000100150.DEPDC5	22	32149944	32303012	0.0409	rs16989542	-2.16	rs3213524	0.013657	-4.1	0.266	113	113	blup	0.024	0.0016	0.64466	0.519
NA	./WEIGHTS//train_weights/Q8TDB4.ENSG00000137463.wgt.RDat	ENSG00000137463.MGARP	4	140187317	140201492	0.2096	rs4306907	-2.54	rs4863639	0.04824	5.21	-0.644	69	1	top1	0.048	5.4e-05	-0.644	0.52
NA	./WEIGHTS//train_weights/Q14353.ENSG00000130005.wgt.RDat	ENSG00000130005.GAMT	19	1397091	1401569	0.0528	rs3786978	1.98	rs11668809	0.012743	-3.91	-0.528	62	62	bslmm	0.027	0.00089	-0.6428	0.5203
NA	./WEIGHTS//train_weights/P48735.ENSG00000182054.wgt.RDat	ENSG00000182054.IDH2	15	90626277	90645736	0.0625	rs12101723	2.19	rs2137891	0.01963	4.3	0.642	85	1	top1	0.02	0.0037	0.642	0.52087
NA	./WEIGHTS//train_weights/P23743.ENSG00000065357.wgt.RDat	ENSG00000065357.DGKA	12	56321103	56347811	0.0445	rs2242295	2.16	rs1052206	0.009039	-4.29	-0.505	45	45	blup	0.029	0.00055	0.642	0.521
NA	./WEIGHTS//train_weights/Q4G0N4.ENSG00000152620.wgt.RDat	ENSG00000152620.NADK2	5	36192694	36242381	0.111	rs3804440	-2.19	rs33671	-0.002667	-2.66	0.224	79	79	bslmm	0.017	0.0066	0.6375	0.52377
NA	./WEIGHTS//train_weights/Q15437.ENSG00000101310.wgt.RDat	ENSG00000101310.SEC23B	20	18488137	18542059	0.0655	rs6081150	1.39	rs2247746	0.034378	4.18	-0.636	109	1	top1	0.034	0.00024	-0.636	0.5248
NA	./WEIGHTS//train_weights/Q9BYB4.ENSG00000185838.wgt.RDat	ENSG00000185838.GNB1L	22	19770747	19842462	0.1156	rs7293017	-2.88	rs2073762	0.094443	6.27	-0.901	153	4	lasso	0.1	4.8e-10	-0.63633	0.525
NA	./WEIGHTS//train_weights/P18887.ENSG00000073050.wgt.RDat	ENSG00000073050.XRCC1	19	44047192	44084625	0.0765	rs433226	-1.92	rs3213395	0.006354	-3.57	-0.338	128	128	blup	0.022	0.0054	0.6354	0.5252
NA	./WEIGHTS//train_weights/O75131.ENSG00000085719.wgt.RDat	ENSG00000085719.CPNE3	8	87497059	87573726	0.0872	rs7832569	2	rs10956871	0.071668	-5.38	-0.299	102	102	bslmm	0.088	2.9e-09	0.6352	0.525317
NA	./WEIGHTS//train_weights/Q3KQV9.ENSG00000197355.wgt.RDat	ENSG00000197355.UAP1L1	9	139971953	139978991	0.1273	rs7047770	-1.825	rs7467117	0.148654	-7.49	-0.634	85	1	top1	0.15	9.6e-15	0.634	0.52608
NA	./WEIGHTS//train_weights/Q99961.ENSG00000141985.wgt.RDat	ENSG00000141985.SH3GL1	19	4360367	4400544	0.0446	rs2288932	-2.65	rs760369	0.042462	4.46	-0.633	118	1	top1	0.042	3.4e-05	-0.633	0.5267
NA	./WEIGHTS//train_weights/Q16774.ENSG00000143774.wgt.RDat	ENSG00000143774.GUK1	1	228327663	228336685	0.0729	rs12564763	-1.58	rs4653908	0.035516	3.99	-0.629	59	1	top1	0.036	0.00014	-0.629	0.529
NA	./WEIGHTS//train_weights/Q9BYD2.ENSG00000143436.wgt.RDat	ENSG00000143436.MRPL9	1	151732119	151736040	0.0424	rs3790508	-3.55	rs8480	0.011635	-3.96	-0.629	87	1	top1	0.012	0.021	0.629	0.529
NA	./WEIGHTS//train_weights/Q9H993.ENSG00000146476.wgt.RDat	ENSG00000146476.C6orf211	6	151773422	151791236	0.0492	rs3734795	2.84	rs7771156	0.054959	-4.69	0.629	97	1	top1	0.055	2.6e-06	-0.629	0.529
NA	./WEIGHTS//train_weights/O95396.ENSG00000124217.wgt.RDat	ENSG00000124217.MOCS3	20	49575363	49577820	0.0279	rs4811103	-2.54	rs6020837	-0.002151	-3.92	1.271	86	86	bslmm	0.0071	0.061	-0.629	0.5291
NA	./WEIGHTS//train_weights/Q15276.ENSG00000029725.wgt.RDat	ENSG00000029725.RABEP1	17	5185558	5289129	0.0807	rs1806264	2.15	rs9891728	0.0961	-6.64	0.623	117	1	top1	0.096	4.9e-10	-0.623	0.533
NA	./WEIGHTS//train_weights/Q93088.ENSG00000145692.wgt.RDat	ENSG00000145692.BHMT	5	78407602	78428108	0.3107	rs12189248	-1.85	rs7700970	0.166269	-7.64	-0.31	82	82	bslmm	0.19	2.9e-17	0.6224	0.53371
NA	./WEIGHTS//train_weights/P30085.ENSG00000162368.wgt.RDat	ENSG00000162368.CMPK1	1	47799469	47844511	0.4749	rs6700838	3.38	rs7555040	0.117707	-6.83	0.083	85	14	enet	0.14	2.4e-14	-0.622	0.534
NA	./WEIGHTS//train_weights/Q9NR50.ENSG00000070785.wgt.RDat	ENSG00000070785.EIF2B3	1	45316450	45452282	0.0393	rs12407627	-2.07	rs11573562	0.011475	4.51	1.233	102	102	blup	0.028	0.0006	0.6205	0.535
NA	./WEIGHTS//train_weights/Q9BV20.ENSG00000037757.wgt.RDat	ENSG00000037757.MRI1	19	13875346	13885096	0.3083	rs10422746	-2.73	rs371671	0.230174	-9.35	-0.62	54	1	top1	0.23	2.9e-23	0.62	0.5353
NA	./WEIGHTS//train_weights/Q03591.ENSG00000244414.wgt.RDat	ENSG00000244414.CFHR1	1	196788887	196801319	0.1409	rs12406509	-2.09	rs16840522	0.195281	-7.76	0.089	29	8	enet	0.22	1.1e-17	0.6186	0.536
NA	./WEIGHTS//train_weights/Q96G03.ENSG00000169299.wgt.RDat	ENSG00000169299.PGM2	4	37828255	37864558	0.1646	rs11096913	-2.59	rs3775793	0.2626	10.03	-0.619	174	1	top1	0.26	8.8e-27	-0.619	0.536
NA	./WEIGHTS//train_weights/Q15283.ENSG00000155903.wgt.RDat	ENSG00000155903.RASA2	3	141205889	141334184	0.1021	rs10935431	-2.37	rs16851483	0.084671	6.12	-0.149	138	138	blup	0.094	8.1e-10	-0.6182	0.53647
NA	./WEIGHTS//train_weights/P50148.ENSG00000156052.wgt.RDat	ENSG00000156052.GNAQ	9	80331003	80646374	0.0215	rs9969693	-2.224	rs7856137	0.019131	-4.13	0.616	165	1	top1	0.019	0.0042	-0.616	0.53789
NA	./WEIGHTS//train_weights/Q6UB35.ENSG00000120254.wgt.RDat	ENSG00000120254.MTHFD1L	6	151186685	151423023	0.1147	rs175862	3.46	rs6922269	-0.001427	3.42	-0.699	286	286	bslmm	0.031	0.00037	0.6161	0.538
NA	./WEIGHTS//train_weights/Q9Y6R7.ENSG00000090920.wgt.RDat	ENSG00000090920.FCGBP	19	40353963	40440533	0.1271	rs3810386	3.22	rs3760920	0.063239	5.73	-0.035	113	2	lasso	0.084	6.9e-09	-0.6156	0.5381
NA	./WEIGHTS//train_weights/Q92543.ENSG00000120451.wgt.RDat	ENSG00000120451.SNX19	11	130745331	130786404	0.0726	rs6590509	2.18	rs2276097	0.043945	-4.45	-1.333	145	145	bslmm	0.044	7.8e-05	0.61509	0.53849
NA	./WEIGHTS//train_weights/Q8WW59.ENSG00000176422.wgt.RDat	ENSG00000176422.SPRYD4	12	56862301	56864763	0.1706	rs11171846	2	rs1043011	0.128386	7.13	-0.615	64	1	top1	0.13	4.7e-13	-0.615	0.539
NA	./WEIGHTS//train_weights/Q9NX00.ENSG00000130748.wgt.RDat	ENSG00000130748.TMEM160	19	47549165	47551888	0.0895	rs11669745	-1.86	rs11669142	0.05044	4.69	0.613	36	1	top1	0.05	1.2e-05	0.613	0.5399
NA	./WEIGHTS//train_weights/Q9UHJ6.ENSG00000197417.wgt.RDat	ENSG00000197417.SHPK	17	3511556	3539616	0.4301	rs925102	2.87	rs17707155	0.274	10.18	0.645	149	149	bslmm	0.38	1e-40	0.61095	0.541
NA	./WEIGHTS//train_weights/O60285.ENSG00000074590.wgt.RDat	ENSG00000074590.NUAK1	12	106457118	106533811	0.0655	rs1215599	3.35	rs17038085	0.059041	4.85	0.61	185	1	top1	0.059	1.1e-06	0.61	0.542
NA	./WEIGHTS//train_weights/Q9H169.ENSG00000015592.wgt.RDat	ENSG00000015592.STMN4	8	27092840	27115937	0.0627	rs10105953	2.42	rs3739212	0.058389	5.1	-0.609	93	1	top1	0.058	1.6e-06	-0.609	0.542524
NA	./WEIGHTS//train_weights/Q13630.ENSG00000104522.wgt.RDat	ENSG00000104522.TSTA3	8	144694788	144700218	0.1105	rs10100154	1.65	rs7817301	0.048136	4.89	-0.455	85	85	bslmm	0.079	1.7e-08	0.608	0.543191
NA	./WEIGHTS//train_weights/Q53S58.ENSG00000144120.wgt.RDat	ENSG00000144120.TMEM177	2	120436743	120444083	0.0282	rs1879710	2.682	rs4480991	0.013316	3.8	-0.28	51	51	bslmm	0.02	0.0046	0.6068	0.544
NA	./WEIGHTS//train_weights/Q6SZW1.ENSG00000004139.wgt.RDat	ENSG00000004139.SARM1	17	26691378	26728065	0.2463	rs16964261	1.98	rs739439	0.162	7.99	0.605	79	1	top1	0.16	2.5e-16	0.605	0.545
NA	./WEIGHTS//train_weights/Q9UHL4.ENSG00000176978.wgt.RDat	ENSG00000176978.DPP7	9	140004994	140009629	0.2281	rs7047770	-1.825	rs4880091	0.292087	-10.51	0.605	76	1	top1	0.29	4.1e-30	-0.605	0.54518
NA	./WEIGHTS//train_weights/O60664.ENSG00000105355.wgt.RDat	ENSG00000105355.PLIN3	19	4838353	4867780	0.0953	rs4807627	2.45	rs8289	0.022249	-4.78	0.38	96	7	enet	0.079	1.7e-08	-0.6045	0.5455
NA	./WEIGHTS//train_weights/Q8NCW5.ENSG00000163382.wgt.RDat	ENSG00000163382.APOA1BP	1	156561554	156564091	0.1992	rs1171566	1.56	rs12567958	0.219157	-9.31	0.702	102	12	lasso	0.26	1.2e-26	-0.6041	0.546
NA	./WEIGHTS//train_weights/O14531.ENSG00000151640.wgt.RDat	ENSG00000151640.DPYSL4	10	134000404	134019280	0.0641	rs4880335	2.73	rs7096307	0.070746	5.42	-0.603	125	1	top1	0.071	9.9e-08	-0.603	0.546509
NA	./WEIGHTS//train_weights/Q66K74.ENSG00000130479.wgt.RDat	ENSG00000130479.MAP1S	19	17830051	17845325	0.109	rs7256058	-2.05	rs12979056	0.13649	-7.4	-0.343	91	11	enet	0.14	5.2e-14	0.6016	0.5474
NA	./WEIGHTS//train_weights/Q96BQ5.ENSG00000164366.wgt.RDat	ENSG00000164366.CCDC127	5	196986	218330	0.3272	rs4956994	2.25	rs9763161	0.150934	7.73	-0.637	110	11	lasso	0.21	7.3e-21	-0.6013	0.54767
NA	./WEIGHTS//train_weights/Q9H299.ENSG00000142669.wgt.RDat	ENSG00000142669.SH3BGRL3	1	26605667	26608007	0.0333	rs1071849	1.77	rs4659419	0.034086	4.11	0.601	124	1	top1	0.034	0.00019	0.601	0.548
NA	./WEIGHTS//train_weights/P04040.ENSG00000121691.wgt.RDat	ENSG00000121691.CAT	11	34460472	34493609	0.0786	rs2300181	2.29	rs10836244	0.068156	-5.27	0.6	188	1	top1	0.068	1.7e-07	-0.6	0.54851
NA	./WEIGHTS//train_weights/Q86UT6.ENSG00000160703.wgt.RDat	ENSG00000160703.NLRX1	11	119037277	119054725	0.1256	rs599385	-3.48	rs4938637	0.059389	5.25	-0.885	85	6	lasso	0.079	2e-08	0.59954	0.54881
NA	./WEIGHTS//train_weights/Q969Z0.ENSG00000136270.wgt.RDat	ENSG00000136270.TBRG4	7	45139699	45151646	0.1631	rs10264280	-2.45	rs2304693	0.189333	-8.59	-0.599	130	1	top1	0.19	5.1e-19	0.599	0.549
NA	./WEIGHTS//train_weights/O15439.ENSG00000125257.wgt.RDat	ENSG00000125257.ABCC4	13	95672083	95953687	0.1078	rs10508011	-3.54	rs9561866	0.043623	-4.38	-0.598	491	1	top1	0.044	4.5e-05	0.598	0.5498
NA	./WEIGHTS//train_weights/Q9HBL8.ENSG00000153406.wgt.RDat	ENSG00000153406.NMRAL1	16	4511681	4545764	0.4463	rs3747575	-1.71	rs11557236	0.134	-7.1	-0.503	68	68	bslmm	0.16	1.6e-15	0.59813	0.55
NA	./WEIGHTS//train_weights/Q9NUV9.ENSG00000133574.wgt.RDat	ENSG00000133574.GIMAP4	7	150264365	150271041	0.1484	rs4725906	2.45	rs12531207	0.14275	7.42	0.999	114	5	lasso	0.18	2.3e-18	0.5958	0.551
NA	./WEIGHTS//train_weights/Q92854.ENSG00000187764.wgt.RDat	ENSG00000187764.SEMA4D	9	91975702	92113045	0.0492	rs7045789	3.182	rs9410321	0.002358	-3.91	-1.568	129	129	blup	0.037	9.4e-05	0.5947	0.55207
NA	./WEIGHTS//train_weights/Q9NRY5.ENSG00000055147.wgt.RDat	ENSG00000055147.FAM114A2	5	153369688	153418496	0.0609	rs6891435	1.62	rs378267	0.104513	-6.44	0.593	90	1	top1	0.1	8.1e-11	-0.593	0.55318
NA	./WEIGHTS//train_weights/Q6EMK4.ENSG00000168140.wgt.RDat	ENSG00000168140.VASN	16	4421849	4433529	0.0241	rs4786480	-2.18	rs8051831	-7.92e-05	-3.49	0.475	65	65	blup	0.0068	0.061	0.5916	0.554
NA	./WEIGHTS//train_weights/Q9Y5N5.ENSG00000156239.wgt.RDat	ENSG00000156239.N6AMT1	21	30244513	30257693	0.3402	rs2247809	1.38	rs7282280	0.341906	-10.25	-0.532	95	7	lasso	0.36	1.7e-30	0.59	0.5549
NA	./WEIGHTS//train_weights/Q8WVF1.ENSG00000116885.wgt.RDat	ENSG00000116885.OSCP1	1	36881428	36916086	0.0787	rs7530283	3.45	rs16823042	0.108907	-6.75	0.531	113	2	lasso	0.11	2.7e-11	-0.588	0.557
NA	./WEIGHTS//train_weights/P12955.ENSG00000124299.wgt.RDat	ENSG00000124299.PEPD	19	33877856	34012700	0.2408	rs4805902	3.14	rs3556	0.271911	10.45	0.284	157	7	lasso	0.34	3.9e-36	0.5867	0.5574
NA	./WEIGHTS//train_weights/Q7Z699.ENSG00000166068.wgt.RDat	ENSG00000166068.SPRED1	15	38544527	38649450	0.0468	rs4411472	3.03	rs4924250	-0.00204	3.69	0.153	143	143	blup	0.023	0.0023	0.58121	0.5611
NA	./WEIGHTS//train_weights/P82909.ENSG00000134056.wgt.RDat	ENSG00000134056.MRPS36	5	68513587	68525956	0.0333	rs2069433	2.28	rs6877725	0.005952	3.99	-0.93	77	77	blup	0.013	0.015	-0.58	0.56191
NA	./WEIGHTS//train_weights/Q8N0X4.ENSG00000125246.wgt.RDat	ENSG00000125246.CLYBL	13	100258919	100549387	0.4924	rs1341399	2.63	rs7992587	0.30156	11.11	-0.653	272	8	lasso	0.32	1.5e-33	-0.579	0.5628
NA	./WEIGHTS//train_weights/P50213.ENSG00000166411.wgt.RDat	ENSG00000166411.IDH3A	15	78423840	78464291	0.1275	rs11072745	-2.93	rs3816253	0.16832	8.34	0.867	119	23	enet	0.17	3.9e-17	0.57869	0.5628
NA	./WEIGHTS//train_weights/Q86WA6.ENSG00000137274.wgt.RDat	ENSG00000137274.BPHL	6	3118608	3153812	0.2918	rs1040861	-2.4	rs10458071	0.208082	-9.82	0.516	75	22	enet	0.27	4.8e-27	-0.5783	0.563
NA	./WEIGHTS//train_weights/Q96EP9.ENSG00000145248.wgt.RDat	ENSG00000145248.SLC10A4	4	48485360	48491213	0.0731	rs3811759	2.79	rs17609740	0.06084	4.32	-0.576	55	1	top1	0.061	3.9e-05	-0.576	0.565
NA	./WEIGHTS//train_weights/Q9P2K8.ENSG00000128829.wgt.RDat	ENSG00000128829.EIF2AK4	15	40226347	40327797	0.0829	rs495592	-2.37	rs8041057	0.06887	-5.11	0.575	145	1	top1	0.069	3.4e-07	-0.575	0.56529
NA	./WEIGHTS//train_weights/Q4KMQ2.ENSG00000177119.wgt.RDat	ENSG00000177119.ANO6	12	45609770	45834187	0.1099	rs6582553	3.07	rs7977798	0.021353	-4.38	-0.574	144	1	top1	0.021	0.0026	0.574	0.566
NA	./WEIGHTS//train_weights/Q9Y5Q9.ENSG00000119041.wgt.RDat	ENSG00000119041.GTF3C3	2	197627756	197664449	0.051	rs6751627	1.147	rs3806507	0.055802	-4.4	0.574	63	1	top1	0.056	3.2e-05	-0.574	0.566
NA	./WEIGHTS//train_weights/O15018.ENSG00000133401.wgt.RDat	ENSG00000133401.PDZD2	5	31639517	32111037	0.0909	rs4867076	-2.87	rs1973532	0.00245	-3.96	-1.746	412	412	blup	0.012	0.021	-0.5736	0.56624
NA	./WEIGHTS//train_weights/Q0VDG4.ENSG00000144306.wgt.RDat	ENSG00000144306.SCRN3	2	175260458	175294303	0.3487	rs1450043	-2.159	rs7570614	0.134603	-8.54	-0.527	71	71	bslmm	0.34	3.3e-36	-0.5721	0.567
NA	./WEIGHTS//train_weights/P27144.ENSG00000162433.wgt.RDat	ENSG00000162433.AK4	1	65613232	65697828	0.1051	rs6696692	-2.55	rs4511159	0.094734	6.44	0.484	126	4	lasso	0.11	2.2e-11	0.5677	0.57
NA	./WEIGHTS//train_weights/Q9NXA8.ENSG00000124523.wgt.RDat	ENSG00000124523.SIRT5	6	13574816	13614790	0.1919	rs16874223	-2.25	rs3757261	0.060553	-6.05	1.117	93	33	enet	0.15	4.9e-15	-0.5683	0.57
NA	./WEIGHTS//train_weights/Q96EM0.ENSG00000126790.wgt.RDat	ENSG00000126790.L3HYPDH	14	59927081	59951148	0.193	rs10133177	1.64	rs2145042	0.103906	-7.57	-0.122	102	22	enet	0.21	2.9e-21	-0.5633	0.5732
NA	./WEIGHTS//train_weights/A4D161.ENSG00000188732.wgt.RDat	ENSG00000188732.FAM221A	7	23719749	23742868	0.1049	rs11981779	-1.92	rs6461725	0.110191	-6.67	-0.562	92	1	top1	0.11	9e-11	0.562	0.574
NA	./WEIGHTS//train_weights/O00154.ENSG00000097021.wgt.RDat	ENSG00000097021.ACOT7	1	6324329	6454451	0.066	rs12087088	-1.87	rs3789498	0.083161	-6.47	-0.2	114	5	enet	0.091	1.3e-09	0.5613	0.575
NA	./WEIGHTS//train_weights/Q9P260.ENSG00000134444.wgt.RDat	ENSG00000134444.KIAA1468	18	59854491	59974355	0.055	rs17069634	2.66	rs9320002	0.0749	-5.45	0.56	134	1	top1	0.075	4.2e-08	-0.56	0.57548
NA	./WEIGHTS//train_weights/Q04828.ENSG00000187134.wgt.RDat	ENSG00000187134.AKR1C1	10	4934796	5025475	0.0823	rs1005907	-3.82	rs4323780	-0.0026	-3.69	-1.482	188	188	blup	0.03	0.00042	0.55795	0.57688
NA	./WEIGHTS//train_weights/Q7KZN9.ENSG00000014919.wgt.RDat	ENSG00000014919.COX15	10	101471601	101491857	0.0535	rs17112219	2.09	rs3740078	0.036489	-4.3	0.557	81	1	top1	0.036	0.00011	-0.557	0.577527
NA	./WEIGHTS//train_weights/Q9BRJ2.ENSG00000174100.wgt.RDat	ENSG00000174100.MRPL45	17	36452989	36479101	0.119	rs8066255	2.07	rs11868136	0.0047	-2.94	1.114	39	39	bslmm	0.034	0.00018	0.55455	0.579
NA	./WEIGHTS//train_weights/Q6UXG2.ENSG00000116299.wgt.RDat	ENSG00000116299.KIAA1324	1	109656301	109749401	0.0732	rs17034458	2.52	rs12239854	0.039258	-5.35	-0.103	125	14	enet	0.061	7.2e-07	-0.5541	0.58
NA	./WEIGHTS//train_weights/P36969.ENSG00000167468.wgt.RDat	ENSG00000167468.GPX4	19	1103936	1106787	0.2033	rs7247087	-2.69	rs4807542	0.148909	7.59	1.265	82	82	bslmm	0.17	2.1e-17	0.5527	0.5805
NA	./WEIGHTS//train_weights/Q53H96.ENSG00000104524.wgt.RDat	ENSG00000104524.PYCRL	8	144686083	144691943	0.209	rs10100154	1.65	rs11549789	0.090361	-5.96	-0.53	87	87	bslmm	0.14	5.3e-14	0.5523	0.580724
NA	./WEIGHTS//train_weights/Q86X76.ENSG00000158793.wgt.RDat	ENSG00000158793.NIT1	1	161087876	161095235	0.5301	rs7512012	2.8	rs1127525	0.255793	-9.92	-1.202	93	6	lasso	0.32	2.9e-33	0.5511	0.582
NA	./WEIGHTS//train_weights/Q9GZT8.ENSG00000196290.wgt.RDat	ENSG00000196290.NIF3L1	2	201754050	201768655	0.0239	rs7224	2.123	rs3901120	0.022116	4.03	-0.55	53	1	top1	0.022	0.0022	-0.55	0.582
NA	./WEIGHTS//train_weights/P54727.ENSG00000119318.wgt.RDat	ENSG00000119318.RAD23B	9	110045418	110094475	0.1094	rs7032927	-3	rs7038659	-0.00235	3.25	-0.617	147	147	bslmm	0.0061	0.071	-0.5502	0.58221
NA	./WEIGHTS//train_weights/P50395.ENSG00000057608.wgt.RDat	ENSG00000057608.GDI2	10	5807186	5884095	0.0547	rs7770	-2.12	rs2797496	0.013242	-4.31	-0.505	137	3	lasso	0.026	0.00097	-0.54901	0.582999
NA	./WEIGHTS//train_weights/P19397.ENSG00000143119.wgt.RDat	ENSG00000143119.CD53	1	111415775	111442550	0.0673	rs947633	-3	rs343810	0.068959	4.58	0.549	99	1	top1	0.069	6.5e-05	0.549	0.583
NA	./WEIGHTS//train_weights/P53985.ENSG00000155380.wgt.RDat	ENSG00000155380.SLC16A1	1	113454469	113499635	0.0503	rs11578123	-1.68	rs1539624	0.021143	4.04	0.624	56	3	lasso	0.025	0.0013	0.5486	0.583
NA	./WEIGHTS//train_weights/P26440.ENSG00000128928.wgt.RDat	ENSG00000128928.IVD	15	40697686	40728146	0.194	rs1898885	2.11	rs7165012	0.15628	-8.08	-0.155	86	11	lasso	0.23	2.6e-23	0.54785	0.5838
NA	./WEIGHTS//train_weights/O75208.ENSG00000088682.wgt.RDat	ENSG00000088682.COQ9	16	57481337	57495187	0.1021	rs9925562	1.87	rs190108	0.0872	6.61	-0.613	100	100	blup	0.11	1.8e-11	-0.54737	0.584
NA	./WEIGHTS//train_weights/Q96F24.ENSG00000148572.wgt.RDat	ENSG00000148572.NRBF2	10	64893050	64914783	0.0363	rs16913026	-2.04	rs4379723	0.010522	-4.19	0.63	77	2	lasso	0.015	0.011	-0.54734	0.584147
NA	./WEIGHTS//train_weights/Q8NFT2.ENSG00000157214.wgt.RDat	ENSG00000157214.STEAP2	7	89796904	89867451	0.0713	rs6966057	-3.03	rs11563944	0.00701	-3.52	0.145	93	93	bslmm	0.029	0.00054	0.5466	0.585
NA	./WEIGHTS//train_weights/O95716.ENSG00000105514.wgt.RDat	ENSG00000105514.RAB3D	19	11432722	11456946	0.1409	rs3745683	2.35	rs172757	0.110251	6.77	0.546	83	1	top1	0.11	2.4e-11	0.546	0.5851
NA	./WEIGHTS//train_weights/Q9NRS6.ENSG00000110025.wgt.RDat	ENSG00000110025.SNX15	11	64794880	64808044	0.1271	rs733303	3	rs534236	0.044953	-5.37	-0.738	98	22	enet	0.091	1.8e-09	0.54552	0.5854
NA	./WEIGHTS//train_weights/Q9H2H8.ENSG00000240344.wgt.RDat	ENSG00000240344.PPIL3	2	201735630	201754026	0.5575	rs10515941	2.762	rs3851973	0.440421	-13.73	-0.865	60	13	enet	0.54	5.2e-66	0.5444	0.586
NA	./WEIGHTS//train_weights/O15056.ENSG00000078269.wgt.RDat	ENSG00000078269.SYNJ2	6	158402888	158520208	0.0708	rs9459503	-1.58	rs756071	0.038643	-4.53	-0.545	176	1	top1	0.039	9.6e-05	0.545	0.586
NA	./WEIGHTS//train_weights/Q9BTY2.ENSG00000001036.wgt.RDat	ENSG00000001036.FUCA2	6	143815948	143832827	0.2722	rs742380	-2.44	rs11155297	0.207739	-7.97	-0.746	140	2	lasso	0.21	7.1e-17	0.5431	0.587
NA	./WEIGHTS//train_weights/Q7L266.ENSG00000162174.wgt.RDat	ENSG00000162174.ASRGL1	11	62104920	62160882	0.1719	rs1528728	2.17	rs2463833	0.191699	8.79	0.803	119	7	lasso	0.22	6.8e-22	0.54212	0.58774
NA	./WEIGHTS//train_weights/Q9NVE7.ENSG00000157881.wgt.RDat	ENSG00000157881.PANK4	1	2439972	2458039	0.0601	rs4233033	3.14	rs10910082	0.045902	5.53	1.542	96	6	enet	0.069	1.4e-07	0.5416	0.588
NA	./WEIGHTS//train_weights/P43897.ENSG00000123297.wgt.RDat	ENSG00000123297.TSFM	12	58176372	58201854	0.0956	rs10783853	-2.11	rs10877019	0.169133	-8.05	-0.542	77	1	top1	0.17	5.4e-17	0.542	0.588
NA	./WEIGHTS//train_weights/Q9NVP1.ENSG00000088205.wgt.RDat	ENSG00000088205.DDX18	2	118572226	118589955	0.0594	rs13035453	2.664	rs4849629	0.035346	5.14	-0.554	115	10	enet	0.074	4.7e-08	-0.5405	0.589
NA	./WEIGHTS//train_weights/P53004.ENSG00000106605.wgt.RDat	ENSG00000106605.BLVRA	7	43798279	43846939	0.1947	rs10224322	-2.73	rs3807518	0.08025	-6.15	0.062	86	4	lasso	0.12	6.7e-12	-0.5401	0.589
NA	./WEIGHTS//train_weights/A3KMH1.ENSG00000102763.wgt.RDat	ENSG00000102763.VWA8	13	42140973	42535256	0.177	rs7323105	-2.06	rs9594643	0.147668	-7.88	-0.586	166	9	lasso	0.17	6.2e-17	0.538	0.5903
NA	./WEIGHTS//train_weights/Q8N8N7.ENSG00000140043.wgt.RDat	ENSG00000140043.PTGR2	14	74318547	74353530	0.3321	rs2878733	2.069	rs8020267	0.212656	10.16	-0.008	104	23	enet	0.37	3.1e-40	-0.5378	0.5907
NA	./WEIGHTS//train_weights/P19174.ENSG00000124181.wgt.RDat	ENSG00000124181.PLCG1	20	39765600	39811629	0.0824	rs8116803	1.77	rs753381	0.055064	5.81	-0.313	54	54	blup	0.09	1.9e-09	-0.534	0.5934
NA	./WEIGHTS//train_weights/Q9Y5X3.ENSG00000089006.wgt.RDat	ENSG00000089006.SNX5	20	17922241	17949623	0.0473	rs6080892	-2.01	rs17802664	0.02126	4.14	0.823	131	131	bslmm	0.022	0.0022	0.534	0.5935
NA	./WEIGHTS//train_weights/Q7Z3V4.ENSG00000151148.wgt.RDat	ENSG00000151148.UBE3B	12	109915207	109974507	0.0712	rs6663	-2.44	rs7358739	0.040636	4.44	-0.533	131	1	top1	0.041	4.9e-05	-0.533	0.594
NA	./WEIGHTS//train_weights/Q9H446.ENSG00000111832.wgt.RDat	ENSG00000111832.RWDD1	6	116892530	116918838	0.0383	rs17078062	1.54	rs11961321	0.040845	-5.1	-0.465	74	4	enet	0.042	3.9e-05	0.5331	0.594
NA	./WEIGHTS//train_weights/Q9BX68.ENSG00000137133.wgt.RDat	ENSG00000137133.HINT2	9	35812957	35815351	0.058	rs877365	-1.907	rs4879929	0.036381	-4.62	-0.533	85	1	top1	0.036	0.00012	0.533	0.59403
NA	./WEIGHTS//train_weights/A6NGN9.ENSG00000142549.wgt.RDat	ENSG00000142549.IGLON5	19	51815102	51833608	0.1273	rs166653	-2.31	rs2062655	0.033231	4.9	0.056	113	113	bslmm	0.065	3.4e-07	0.5316	0.595
NA	./WEIGHTS//train_weights/Q96JE9.ENSG00000171533.wgt.RDat	ENSG00000171533.MAP6	11	75297963	75380165	0.1399	rs1793398	2.28	rs583231	0.089637	6.03	-0.011	131	9	lasso	0.1	1.5e-10	-0.53048	0.59578
NA	./WEIGHTS//train_weights/Q9BPY3.ENSG00000197798.wgt.RDat	ENSG00000197798.FAM118B	11	126081309	126132881	0.0598	rs522486	2.6	rs679387	0.038424	-4.87	-0.043	173	173	blup	0.049	1.9e-05	0.53011	0.59603
NA	./WEIGHTS//train_weights/P49758.ENSG00000182732.wgt.RDat	ENSG00000182732.RGS6	14	72399156	73030654	0.1183	rs8010242	3.023	rs36341	0.066142	-5.56	-0.865	550	550	bslmm	0.08	1.6e-08	0.5299	0.5962
NA	./WEIGHTS//train_weights/P35475.ENSG00000127415.wgt.RDat	ENSG00000127415.IDUA	4	980785	998316	0.1795	rs6599389	6.69	rs4647939	0.10407	5.56	3.464	110	6	enet	0.13	2.6e-09	0.5282	0.597
NA	./WEIGHTS//train_weights/Q7Z2W4.ENSG00000105939.wgt.RDat	ENSG00000105939.ZC3HAV1	7	138728266	138794465	0.0672	rs7792792	1.91	rs6975036	0.034907	4.35	0.043	116	116	bslmm	0.04	5.9e-05	-0.5283	0.597
NA	./WEIGHTS//train_weights/Q6UXK2.ENSG00000167178.wgt.RDat	ENSG00000167178.ISLR2	15	74392652	74430881	0.0705	rs12440766	-1.8	rs8033129	0.022	3.86	-0.393	63	63	bslmm	0.039	9.3e-05	0.52657	0.59849
NA	./WEIGHTS//train_weights/O76062.ENSG00000149809.wgt.RDat	ENSG00000149809.TM7SF2	11	64879317	64883856	0.0697	rs502333	-2.23	rs9971407	0.032666	-4.21	-0.938	87	3	lasso	0.038	9.5e-05	0.52559	0.59917
NA	./WEIGHTS//train_weights/Q8NFF2.ENSG00000140090.wgt.RDat	ENSG00000140090.SLC24A4	14	92788925	92962596	0.1444	rs4374096	2.183	rs10135174	-0.001222	3.31	0.825	158	158	bslmm	0.021	0.0054	0.5254	0.5993
NA	./WEIGHTS//train_weights/Q6PJ69.ENSG00000141569.wgt.RDat	ENSG00000141569.TRIM65	17	73876416	73893084	0.1358	rs3744033	-2.85	rs8066711	0.114	5.96	0.564	59	6	enet	0.14	4.3e-10	0.5213	0.602
NA	./WEIGHTS//train_weights/O96013.ENSG00000130669.wgt.RDat	ENSG00000130669.PAK4	19	39616410	39673456	0.0305	rs601966	-1.79	rs692191	0.036902	4.18	0.521	92	1	top1	0.037	0.00012	0.521	0.6024
NA	./WEIGHTS//train_weights/P05771.ENSG00000166501.wgt.RDat	ENSG00000166501.PRKCB	16	23847322	24231932	0.06	rs198199	2.72	rs196002	0.0606	-5.16	0.086	296	3	lasso	0.074	5.3e-08	-0.5184	0.604
NA	./WEIGHTS//train_weights/Q03169.ENSG00000185215.wgt.RDat	ENSG00000185215.TNFAIP2	14	103589779	103603776	0.1325	rs8008371	2.104	rs2282037	0.027573	4.44	-0.722	71	11	enet	0.074	1.6e-06	-0.5161	0.6058
NA	./WEIGHTS//train_weights/P40818.ENSG00000138592.wgt.RDat	ENSG00000138592.USP8	15	50716577	50793280	0.0319	rs3848128	-4.28	rs4775886	0.01102	-3.7	1.063	107	107	blup	0.024	0.0015	0.51479	0.6067
NA	./WEIGHTS//train_weights/P56556.ENSG00000184983.wgt.RDat	ENSG00000184983.NDUFA6	22	42481529	42486959	0.0843	rs2142695	-2.22	rs5751204	0.048058	-5.43	-0.328	61	61	blup	0.062	5.8e-07	0.51437	0.607
NA	./WEIGHTS//train_weights/P11586.ENSG00000100714.wgt.RDat	ENSG00000100714.MTHFD1	14	64854749	64926722	0.0564	rs1950902	1.775	rs1076991	0.05853	-5.37	-0.451	104	104	blup	0.064	4.3e-07	0.5143	0.6071
NA	./WEIGHTS//train_weights/O14786.ENSG00000099250.wgt.RDat	ENSG00000099250.NRP1	10	33466420	33625190	0.1088	rs11009265	2.12	rs2247396	0.011915	-3.85	1.167	225	225	bslmm	0.024	0.0018	-0.51394	0.607291
NA	./WEIGHTS//train_weights/Q9UJU6.ENSG00000136279.wgt.RDat	ENSG00000136279.DBNL	7	44084239	44109055	0.3818	rs10951757	-3.45	rs1894752	0.07515	6.69	1.322	68	28	enet	0.18	8.2e-18	0.5135	0.608
NA	./WEIGHTS//train_weights/Q9P2J5.ENSG00000133706.wgt.RDat	ENSG00000133706.LARS	5	145492601	145562223	0.044	rs10491263	1.79	rs12188581	0.069583	-5.65	-0.512	87	1	top1	0.07	1.3e-07	0.512	0.60865
NA	./WEIGHTS//train_weights/P51178.ENSG00000187091.wgt.RDat	ENSG00000187091.PLCD1	3	38048987	38071253	0.0462	rs6778005	3.42	rs17037286	0.002891	3.36	1.182	93	93	bslmm	0.01	0.029	0.5103	0.60987
NA	./WEIGHTS//train_weights/Q8NB66.ENSG00000137766.wgt.RDat	ENSG00000137766.UNC13C	15	54305101	54920806	0.0695	rs8028136	-2.46	rs8031935	-0.00175	3.53	0.389	436	436	blup	0.026	0.001	-0.50881	0.61089
NA	./WEIGHTS//train_weights/P11182.ENSG00000137992.wgt.RDat	ENSG00000137992.DBT	1	100652475	100715390	0.0775	rs12060945	-2.14	rs2810424	0.107366	-6.58	0.509	90	1	top1	0.11	4.4e-11	-0.509	0.611
NA	./WEIGHTS//train_weights/Q5JTD0.ENSG00000137221.wgt.RDat	ENSG00000137221.TJAP1	6	43445261	43474294	0.0921	rs12195350	-2.4	rs9462902	0.035336	-4.15	0.295	71	71	bslmm	0.066	1.3e-05	0.5087	0.611
NA	./WEIGHTS//train_weights/Q9NQS1.ENSG00000169857.wgt.RDat	ENSG00000169857.AVEN	15	34158428	34331377	0.0625	rs489349	-2.25	rs613479	0.02498	-4.04	-0.284	196	196	blup	0.025	0.0014	-0.50801	0.61145
NA	./WEIGHTS//train_weights/Q9H6R3.ENSG00000111058.wgt.RDat	ENSG00000111058.ACSS3	12	81331594	81650533	0.0899	rs11114743	-2.24	rs4489814	0.021602	4.86	0.314	131	16	enet	0.054	3e-06	0.505	0.614
NA	./WEIGHTS//train_weights/Q86XD5.ENSG00000159784.wgt.RDat	ENSG00000159784.FAM131B	7	143050493	143059863	0.1067	rs10257939	3.05	rs4236482	0.057021	-5.35	0.432	94	9	enet	0.091	1.6e-09	0.5045	0.614
NA	./WEIGHTS//train_weights/Q9UGT4.ENSG00000099994.wgt.RDat	ENSG00000099994.SUSD2	22	24577227	24585078	0.0757	rs5751838	-2	rs35146655	0.088356	4.56	0.503	65	1	top1	0.088	6.4e-06	0.503	0.615
NA	./WEIGHTS//train_weights/Q96HD9.ENSG00000132744.wgt.RDat	ENSG00000132744.ACY3	11	67410026	67418130	0.4303	rs11227881	1.84	rs948445	0.137361	-6.66	-0.499	67	1	top1	0.14	1.7e-11	0.499	0.61778
NA	./WEIGHTS//train_weights/P00387.ENSG00000100243.wgt.RDat	ENSG00000100243.CYB5R3	22	43013846	43045574	0.0931	rs4822185	-2.92	rs137087	0.095375	-6.84	0.34	98	98	blup	0.1	1e-10	0.49897	0.618
NA	./WEIGHTS//train_weights/Q9NWX6.ENSG00000113272.wgt.RDat	ENSG00000113272.THG1L	5	157158205	157168456	0.2093	rs11748404	2.39	rs10051838	0.068904	5.5	0.174	102	102	blup	0.16	2e-11	0.4973	0.61901
NA	./WEIGHTS//train_weights/Q96I99.ENSG00000172340.wgt.RDat	ENSG00000172340.SUCLG2	3	67410884	67705038	0.0756	rs9828970	1.94	rs17806888	0.018236	-4.02	-0.04	248	10	enet	0.031	0.00038	-0.4971	0.61914
NA	./WEIGHTS//train_weights/P80303.ENSG00000070081.wgt.RDat	ENSG00000070081.NUCB2	11	17229700	17371521	0.0907	rs2074312	-1.7	rs739689	0.028785	4.85	-0.417	97	97	bslmm	0.078	2.4e-08	-0.49612	0.61981
NA	./WEIGHTS//train_weights/P20810.ENSG00000153113.wgt.RDat	ENSG00000153113.CAST	5	95860971	96115299	0.0891	rs17086651	-2.56	rs152005	0.065736	5.45	0.016	172	8	lasso	0.07	1.1e-07	-0.4959	0.62
NA	./WEIGHTS//train_weights/Q68D91.ENSG00000176055.wgt.RDat	ENSG00000176055.MBLAC2	5	89754020	89770585	0.0318	rs37482	-1.97	rs10473934	0.03582	4.13	-0.494	74	2	lasso	0.036	0.00012	-0.4953	0.62037
NA	./WEIGHTS//train_weights/Q13228.ENSG00000143416.wgt.RDat	ENSG00000143416.SELENBP1	1	151336778	151345209	0.2263	rs1752382	2	rs17564336	0.134631	-7.35	1.109	58	5	lasso	0.15	5.2e-15	-0.4942	0.621
NA	./WEIGHTS//train_weights/O43929.ENSG00000115947.wgt.RDat	ENSG00000115947.ORC4	2	148687968	148779147	0.0186	rs10180469	-3.613	rs6731371	0.00705	-3.46	0.252	62	62	bslmm	0.009	0.044	0.4945	0.621
NA	./WEIGHTS//train_weights/Q09428.ENSG00000006071.wgt.RDat	ENSG00000006071.ABCC8	11	17414432	17498449	0.0561	rs17715430	2.46	rs4757512	0.070183	-5.28	-0.492	221	1	top1	0.07	2.4e-07	0.492	0.62272
NA	./WEIGHTS//train_weights/P07686.ENSG00000049860.wgt.RDat	ENSG00000049860.HEXB	5	73935848	74018472	0.107	rs2442041	-2.06	rs820880	0.067826	5.42	-0.919	140	23	enet	0.093	8.5e-10	-0.4905	0.62377
NA	./WEIGHTS//train_weights/Q96CN4.ENSG00000142459.wgt.RDat	ENSG00000142459.EVI5L	19	7895119	7929862	0.0565	rs4804233	-2.46	rs11881682	0.005013	-3.61	-0.052	104	104	bslmm	0.015	0.0095	-0.4888	0.625
NA	./WEIGHTS//train_weights/Q9NTJ4.ENSG00000140400.wgt.RDat	ENSG00000140400.MAN2C1	15	75648133	75660971	0.3149	rs4886702	-1.93	rs9673084	0.10493	-6.36	0.486	30	1	top1	0.1	7.4e-11	-0.486	0.62697
NA	./WEIGHTS//train_weights/O95352.ENSG00000197548.wgt.RDat	ENSG00000197548.ATG7	3	11313995	11599139	0.1745	rs2442781	-2.07	rs346076	0.119579	-7.07	-0.486	200	1	top1	0.12	3.2e-12	0.486	0.62697
NA	./WEIGHTS//train_weights/P04066.ENSG00000179163.wgt.RDat	ENSG00000179163.FUCA1	1	24171567	24194784	0.0267	rs2235541	1.88	rs10917430	0.01374	-3.59	0.41	48	48	blup	0.019	0.0044	-0.4861	0.627
NA	./WEIGHTS//train_weights/P09110.ENSG00000060971.wgt.RDat	ENSG00000060971.ACAA1	3	38144620	38178733	0.0834	rs6778005	3.42	rs7625290	0.057024	-5.09	0.687	57	17	enet	0.061	7.3e-07	-0.4855	0.62734
NA	./WEIGHTS//train_weights/Q6BDS2.ENSG00000065060.wgt.RDat	ENSG00000065060.UHRF1BP1	6	34759857	34850915	0.1339	rs6915007	-2.06	rs9462014	0.015608	-4.12	-0.389	91	91	blup	0.076	3.5e-08	-0.485	0.628
NA	./WEIGHTS//train_weights/Q5JS13.ENSG00000136828.wgt.RDat	ENSG00000136828.RALGPS1	9	129677053	129985445	0.0259	rs2779734	3.622	rs10987552	0.004784	3.26	0.435	164	164	bslmm	0.031	0.00063	-0.4837	0.62863
NA	./WEIGHTS//train_weights/Q9Y5B8.ENSG00000143156.wgt.RDat	ENSG00000143156.NME7	1	169101769	169337205	0.0591	rs17518147	2.38	rs4656671	0.094259	-6.3	-0.483	201	1	top1	0.094	9.7e-10	0.483	0.629
NA	./WEIGHTS//train_weights/Q93015.ENSG00000243477.wgt.RDat	ENSG00000243477.NAT6	3	50333833	50336852	0.0796	rs762707	-2.94	rs13100173	0.080656	5.43	0.481	52	1	top1	0.081	4.2e-08	0.481	0.63052
NA	./WEIGHTS//train_weights/Q07002.ENSG00000117266.wgt.RDat	ENSG00000117266.CDK18	1	205473723	205501921	0.2154	rs17419308	-2.79	rs12058761	0.015957	-5	0.94	119	119	bslmm	0.12	8.6e-12	0.4804	0.631
NA	./WEIGHTS//train_weights/P13929.ENSG00000108515.wgt.RDat	ENSG00000108515.ENO3	17	4851387	4860426	0.0825	rs17633650	2.54	rs238238	0.0475	5.31	0.356	94	3	lasso	0.088	1e-08	0.4799	0.631
NA	./WEIGHTS//train_weights/Q8IVI9.ENSG00000163072.wgt.RDat	ENSG00000163072.NOSTRIN	2	169643049	169722024	0.0532	rs3755157	2.42	rs540652	0.038101	4	0.474	171	1	top1	0.038	0.0015	0.474	0.635
NA	./WEIGHTS//train_weights/Q9ULN7.ENSG00000204851.wgt.RDat	ENSG00000204851.PNMAL2	19	46990163	46999755	0.055	rs4803941	-2.12	rs892106	0.017117	-4.71	-1.276	89	89	blup	0.024	0.0015	0.4737	0.6357
NA	./WEIGHTS//train_weights/Q9UHD1.ENSG00000110172.wgt.RDat	ENSG00000110172.CHORDC1	11	89934328	89956532	0.0537	rs2000533	-2.55	rs12417707	0.008185	-4	-1.077	85	85	bslmm	0.015	0.0093	0.47165	0.63718
NA	./WEIGHTS//train_weights/Q7Z7H8.ENSG00000159111.wgt.RDat	ENSG00000159111.MRPL10	17	45900638	45908900	0.1742	rs11079797	2.18	rs3209	0.268	-10.34	-0.47	101	1	lasso	0.28	7.9e-28	0.47	0.638
NA	./WEIGHTS//train_weights/Q5JTZ9.ENSG00000124608.wgt.RDat	ENSG00000124608.AARS2	6	44267391	44281063	0.3159	rs2297334	-2.05	rs2233434	0.205599	-8.86	1.268	107	107	bslmm	0.22	9.4e-22	-0.4707	0.638
NA	./WEIGHTS//train_weights/Q9Y3Z3.ENSG00000101347.wgt.RDat	ENSG00000101347.SAMHD1	20	35518632	35580246	0.1374	rs6102336	-2.06	rs6029941	0.008069	4.29	-0.91	61	18	enet	0.059	1.2e-06	0.47	0.6386
NA	./WEIGHTS//train_weights/Q8N4T8.ENSG00000145439.wgt.RDat	ENSG00000145439.CBR4	4	169784921	169931426	0.0616	rs4692561	1.88	rs6817551	0.08287	-6.07	0.469	85	1	top1	0.083	7.9e-09	-0.469	0.639
NA	./WEIGHTS//train_weights/Q16775.ENSG00000063854.wgt.RDat	ENSG00000063854.HAGH	16	1845621	1877195	0.2015	rs173164	-4.03	rs10500323	0.141	7.85	-0.526	122	122	blup	0.17	1.6e-17	0.46826	0.64
NA	./WEIGHTS//train_weights/Q9BRR6.ENSG00000159322.wgt.RDat	ENSG00000159322.ADPGK	15	73043710	73078187	0.1054	rs4514651	-1.53	rs12439200	0.01185	-4.41	0.771	67	67	bslmm	0.02	0.0044	-0.46769	0.64001
NA	./WEIGHTS//train_weights/Q9Y450.ENSG00000112339.wgt.RDat	ENSG00000112339.HBS1L	6	135281516	135424194	0.0732	rs11752055	2.32	rs6923512	0.071909	5.65	0.273	109	109	blup	0.076	4.3e-08	-0.466	0.641
NA	./WEIGHTS//train_weights/O75689.ENSG00000105963.wgt.RDat	ENSG00000105963.ADAP1	7	937540	995043	0.0529	rs36015262	-1.86	rs4721949	0.006134	-3.61	0.698	81	81	blup	0.02	0.0034	-0.4659	0.641
NA	./WEIGHTS//train_weights/P26885.ENSG00000173486.wgt.RDat	ENSG00000173486.FKBP2	11	64008475	64011604	0.0381	rs4672	-1.64	rs3741403	0.047482	-4.46	0.464	74	1	top1	0.047	1.2e-05	-0.464	0.64265
NA	./WEIGHTS//train_weights/P17655.ENSG00000162909.wgt.RDat	ENSG00000162909.CAPN2	1	223889295	223963720	0.0591	rs7545965	-1.7	rs6678103	0.033778	-4.03	0.463	117	1	top1	0.034	0.0002	-0.463	0.643
NA	./WEIGHTS//train_weights/Q9Y259.ENSG00000100288.wgt.RDat	ENSG00000100288.CHKB	22	51017378	51039884	0.0976	rs6151429	-3.94	rs17001608	-0.002336	3.02	-0.575	104	104	bslmm	0.015	0.01	-0.4628	0.644
NA	./WEIGHTS//train_weights/Q8NF91.ENSG00000131018.wgt.RDat	ENSG00000131018.SYNE1	6	152442819	152958936	0.0829	rs9397554	2.82	rs2695253	0.010918	-4.26	0.063	466	466	bslmm	0.038	8.2e-05	0.4593	0.646
NA	./WEIGHTS//train_weights/Q9UGK8.ENSG00000129158.wgt.RDat	ENSG00000129158.SERGEF	11	17809595	18034709	0.1918	rs4757574	-2.45	rs11024400	0.033315	-5.23	0.162	178	178	blup	0.14	7.2e-13	-0.45673	0.64786
NA	./WEIGHTS//train_weights/Q9HD26.ENSG00000047932.wgt.RDat	ENSG00000047932.GOPC	6	117639374	117923691	0.1322	rs9489215	2.3	rs1472591	0.126326	7.71	-0.971	99	14	enet	0.16	1e-15	-0.4571	0.648
NA	./WEIGHTS//train_weights/P50583.ENSG00000164978.wgt.RDat	ENSG00000164978.NUDT2	9	34329504	34343709	0.1759	rs17258783	3.832	rs4879775	0.130323	7.16	-0.754	76	76	blup	0.2	1.2e-19	0.4546	0.6494
NA	./WEIGHTS//train_weights/O95260.ENSG00000107669.wgt.RDat	ENSG00000107669.ATE1	10	123499939	123688316	0.1427	rs2935715	-1.97	rs10749435	0.119127	-7.3	0.935	205	205	blup	0.16	1.7e-15	-0.45385	0.649939
NA	./WEIGHTS//train_weights/P07305.ENSG00000189060.wgt.RDat	ENSG00000189060.H1F0	22	38201114	38203442	0.0247	rs5750477	-1.68	rs4821714	0.008878	3.3	0.844	58	58	bslmm	0.01	0.029	0.45349	0.65
NA	./WEIGHTS//train_weights/O14498.ENSG00000129009.wgt.RDat	ENSG00000129009.ISLR	15	74466012	74469213	0.0432	rs12440766	-1.8	rs3848159	-0.00292	-2.93	-1.391	60	60	blup	0.023	0.0049	0.45353	0.65017
NA	./WEIGHTS//train_weights/Q96KR6.ENSG00000124098.wgt.RDat	ENSG00000124098.FAM210B	20	54933971	54943719	0.1118	rs6127709	1.95	rs6024786	0.06129	-5.61	0.537	110	110	blup	0.077	2.5e-08	-0.452	0.6515
NA	./WEIGHTS//train_weights/Q16134.ENSG00000171503.wgt.RDat	ENSG00000171503.ETFDH	4	159593277	159630775	0.055	rs13106979	-2.19	rs11559290	0.02261	3.8	0.256	30	11	enet	0.041	4.8e-05	0.4507	0.652
NA	./WEIGHTS//train_weights/Q13126.ENSG00000099810.wgt.RDat	ENSG00000099810.MTAP	9	21802542	21931646	0.1827	rs2518713	-1.857	rs10757257	0.207112	-8.98	-0.404	113	15	enet	0.22	3.3e-22	0.4506	0.6523
NA	./WEIGHTS//train_weights/P43146.ENSG00000187323.wgt.RDat	ENSG00000187323.DCC	18	49866542	51057784	0.1049	rs1145263	-3.27	rs1394466	0.072	-6.38	-0.86	648	648	blup	0.12	2.5e-12	0.449	0.65322
NA	./WEIGHTS//train_weights/P30711.ENSG00000184674.wgt.RDat	ENSG00000184674.GSTT1	22	24376133	24384680	0.5591	rs9624364	-1.93	rs5760176	0.436836	-12.71	-0.108	42	19	enet	0.49	6.5e-56	0.448	0.654
NA	./WEIGHTS//train_weights/Q8IWW6.ENSG00000165322.wgt.RDat	ENSG00000165322.ARHGAP12	10	32094365	32217742	0.0275	rs12261139	2.75	rs12256714	0.02812	-3.77	0.448	121	1	top1	0.028	0.00064	-0.448	0.654153
NA	./WEIGHTS//train_weights/Q6DD88.ENSG00000184743.wgt.RDat	ENSG00000184743.ATL3	11	63391559	63439393	0.055	rs17730754	-1.5	rs17158453	0.042096	-4.43	-0.447	51	1	top1	0.042	3.6e-05	0.447	0.65488
NA	./WEIGHTS//train_weights/Q8N5S9.ENSG00000004660.wgt.RDat	ENSG00000004660.CAMKK1	17	3763609	3798185	0.0952	rs220470	1.93	rs2915546	0.0538	5.05	0.125	100	5	lasso	0.06	8.8e-07	0.44712	0.655
NA	./WEIGHTS//train_weights/P13489.ENSG00000023191.wgt.RDat	ENSG00000023191.RNH1	11	494512	507300	0.1542	rs11246197	2.92	rs11823647	0.214978	-9.19	0.481	79	5	lasso	0.23	2.8e-23	-0.44322	0.6576
NA	./WEIGHTS//train_weights/Q6YP21.ENSG00000137944.wgt.RDat	ENSG00000137944.CCBL2	1	89401456	89458636	0.3634	rs7911	2.05	rs2765527	0.467165	-13.55	-0.346	93	10	enet	0.5	2.3e-58	0.4426	0.658
NA	./WEIGHTS//train_weights/Q9NRD5.ENSG00000100151.wgt.RDat	ENSG00000100151.PICK1	22	38452318	38471708	0.0328	rs139873	1.36	rs1004764	0.016413	-3.8	0.443	83	1	top1	0.016	0.0074	-0.443	0.658
NA	./WEIGHTS//train_weights/Q16698.ENSG00000104325.wgt.RDat	ENSG00000104325.DECR1	8	91013633	91064320	0.0839	rs12675530	1.87	rs1805890	0.060685	-5.85	-0.503	99	14	enet	0.12	1.2e-11	0.442	0.658487
NA	./WEIGHTS//train_weights/Q07065.ENSG00000136026.wgt.RDat	ENSG00000136026.CKAP4	12	106631655	106698057	0.1055	rs1215599	3.35	rs1215761	0.067245	-5.36	-0.192	121	14	enet	0.091	1.5e-09	-0.4419	0.659
NA	./WEIGHTS//train_weights/Q9NQ88.ENSG00000078237.wgt.RDat	ENSG00000078237.C12orf5	12	4430371	4462338	0.0605	rs4456339	-2.44	rs7955866	-0.001668	-3.23	-1.05	153	153	blup	0.029	0.00055	0.4392	0.66
NA	./WEIGHTS//train_weights/Q96LD4.ENSG00000132481.wgt.RDat	ENSG00000132481.TRIM47	17	73870242	73874656	0.0674	rs3744033	-2.85	rs9908862	0.0771	-5.92	0.448	62	6	lasso	0.083	1e-08	-0.43962	0.66
NA	./WEIGHTS//train_weights/Q9HCM3.ENSG00000122778.wgt.RDat	ENSG00000122778.KIAA1549	7	138516126	138666064	0.0694	rs878992	-2.94	rs10259252	0.029447	4.6	-0.335	181	2	lasso	0.043	3e-05	-0.4394	0.66
NA	./WEIGHTS//train_weights/O14908.ENSG00000123159.wgt.RDat	ENSG00000123159.GIPC1	19	14588572	14606944	0.089	rs10416904	2.44	rs8109493	0.051321	-4.82	0.439	70	1	top1	0.051	5.4e-06	-0.439	0.6607
NA	./WEIGHTS//train_weights/Q9H2D1.ENSG00000164933.wgt.RDat	ENSG00000164933.SLC25A32	8	104410863	104427417	0.0715	rs2131858	-3.09	rs17803441	0.032685	-4.21	0.438	96	1	top1	0.033	0.00048	-0.438	0.661386
NA	./WEIGHTS//train_weights/P12821.ENSG00000159640.wgt.RDat	ENSG00000159640.ACE	17	61554422	61599205	0.0783	rs4465659	2.41	rs4305	0.0626	5.51	0.533	68	3	lasso	0.077	2.5e-08	0.43733	0.662
NA	./WEIGHTS//train_weights/Q15274.ENSG00000103485.wgt.RDat	ENSG00000103485.QPRT	16	29674600	29710020	0.3104	rs9922666	-1.56	rs9933310	0.165	-9.65	0.496	28	5	lasso	0.3	3.1e-31	0.43373	0.664
NA	./WEIGHTS//train_weights/O95747.ENSG00000172939.wgt.RDat	ENSG00000172939.OXSR1	3	38206580	38296979	0.0953	rs6778005	3.42	rs7744	0.038267	-5.28	-0.567	92	3	lasso	0.038	7.6e-05	0.4336	0.66457
NA	./WEIGHTS//train_weights/P11310.ENSG00000117054.wgt.RDat	ENSG00000117054.ACADM	1	76190036	76253260	0.1466	rs5745366	2.15	rs1250880	0.127679	-7.19	-0.034	97	26	enet	0.18	1.6e-18	0.4327	0.665
NA	./WEIGHTS//train_weights/Q9Y276.ENSG00000074582.wgt.RDat	ENSG00000074582.BCS1L	2	219523487	219528166	0.0403	rs12989189	1.296	rs12991539	0.004868	-3.18	-0.228	84	84	bslmm	0.02	0.0033	0.4326	0.665
NA	./WEIGHTS//train_weights/P49257.ENSG00000074695.wgt.RDat	ENSG00000074695.LMAN1	18	56995055	57027194	0.0583	rs10515978	-2.46	rs12604758	0.0696	-5.43	0.432	136	1	top1	0.07	1.2e-07	-0.432	0.66574
NA	./WEIGHTS//train_weights/P21266.ENSG00000134202.wgt.RDat	ENSG00000134202.GSTM3	1	110276554	110284384	0.4923	rs17598321	4	rs11807	0.421899	13	0.445	93	21	enet	0.52	1.9e-61	0.4322	0.666
NA	./WEIGHTS//train_weights/Q16595.ENSG00000165060.wgt.RDat	ENSG00000165060.FXN	9	71650175	71715094	0.168	rs5006364	-3.083	rs2498432	0.047522	5.73	0.447	115	5	lasso	0.13	5.4e-13	0.4308	0.66662
NA	./WEIGHTS//train_weights/Q01064.ENSG00000123360.wgt.RDat	ENSG00000123360.PDE1B	12	54943134	54973023	0.1068	rs4758966	2.1	rs10747699	0.070228	-5.26	-0.557	127	6	enet	0.076	3.6e-08	0.4309	0.667
NA	./WEIGHTS//train_weights/Q9NXV2.ENSG00000167977.wgt.RDat	ENSG00000167977.KCTD5	16	2732476	2759031	0.0669	rs11646579	1.8	rs3094481	-0.00461	3.14	0.065	50	50	blup	0.038	0.0025	-0.42557	0.67
NA	./WEIGHTS//train_weights/Q53TN4.ENSG00000071967.wgt.RDat	ENSG00000071967.CYBRD1	2	172378757	172414643	0.2202	rs17221346	2.786	rs2542941	0.210616	8.87	-0.038	113	15	enet	0.25	4.5e-25	-0.4258	0.67
NA	./WEIGHTS//train_weights/Q7Z3D6.ENSG00000133943.wgt.RDat	ENSG00000133943.C14orf159	14	91526677	91691976	0.5009	rs4900070	2.79	rs4900072	0.486921	-13.62	0.426	107	1	top1	0.49	2.3e-56	-0.426	0.6701
NA	./WEIGHTS//train_weights/Q15119.ENSG00000005882.wgt.RDat	ENSG00000005882.PDK2	17	48172101	48189516	0.0657	rs847680	-4.74	rs847693	-0.00218	3.55	-0.289	110	110	bslmm	0.035	0.00016	0.42447	0.671
NA	./WEIGHTS//train_weights/Q32MZ4.ENSG00000124831.wgt.RDat	ENSG00000124831.LRRFIP1	2	238536219	238722325	0.115	rs919973	-2.651	rs10179864	0.011659	-4.2	-2.05	154	154	blup	0.057	1.9e-06	0.4237	0.672
NA	./WEIGHTS//train_weights/Q96HR9.ENSG00000115255.wgt.RDat	ENSG00000115255.REEP6	19	1491165	1497926	0.0731	rs1875960	2.3	rs2656885	0.055349	-5.16	0.423	48	1	top1	0.055	5.8e-06	-0.423	0.6723
NA	./WEIGHTS//train_weights/P05091.ENSG00000111275.wgt.RDat	ENSG00000111275.ALDH2	12	112204691	112247782	0.0594	rs12580246	-1.51	rs4648328	0.122598	-7.25	-0.343	61	9	lasso	0.13	9e-13	0.4224	0.673
NA	./WEIGHTS//train_weights/P50135.ENSG00000150540.wgt.RDat	ENSG00000150540.HNMT	2	138721590	138773930	0.1145	rs10432379	-2.102	rs3100720	0.147344	-7.65	-0.422	125	1	top1	0.15	7.2e-15	0.422	0.673
NA	./WEIGHTS//train_weights/Q9BW30.ENSG00000159713.wgt.RDat	ENSG00000159713.TPPP3	16	67423712	67427438	0.0586	rs10852437	-1.68	rs3868143	0.0562	-5.01	-0.42	50	1	top1	0.056	2e-06	0.42	0.674
NA	./WEIGHTS//train_weights/Q9UJS0.ENSG00000004864.wgt.RDat	ENSG00000004864.SLC25A13	7	95749532	95951459	0.0497	rs17776650	-2.28	rs1989825	0.050934	4.78	-0.421	162	1	top1	0.051	5.9e-06	-0.421	0.674
NA	./WEIGHTS//train_weights/Q9Y2V7.ENSG00000133103.wgt.RDat	ENSG00000133103.COG6	13	40229764	40365802	0.0379	rs7319551	-2.46	rs9548846	0.004941	3.23	1.265	136	136	bslmm	0.021	0.0026	-0.42	0.6746
NA	./WEIGHTS//train_weights/O43813.ENSG00000115365.wgt.RDat	ENSG00000115365.LANCL1	2	211295973	211342376	0.0264	rs2021215	0.913	rs2287420	0.043174	4.23	-0.419	91	1	top1	0.043	2.9e-05	-0.419	0.675
NA	./WEIGHTS//train_weights/O75155.ENSG00000144712.wgt.RDat	ENSG00000144712.CAND2	3	12837971	12913415	0.4259	rs2600228	-1.24	rs4642101	0.329858	-11.06	-0.441	95	6	lasso	0.35	8.6e-36	0.4189	0.6753
NA	./WEIGHTS//train_weights/P36776.ENSG00000196365.wgt.RDat	ENSG00000196365.LONP1	19	5691845	5720583	0.1524	rs2446200	-2.67	rs8104044	0.065435	-6.72	0.267	80	80	bslmm	0.14	1.4e-14	-0.4175	0.6763
NA	./WEIGHTS//train_weights/Q86X55.ENSG00000142453.wgt.RDat	ENSG00000142453.CARM1	19	10982189	11033453	0.0305	rs11669133	-2.02	rs11085749	0.029377	4.46	0.135	70	5	lasso	0.036	0.00012	0.4168	0.6768
NA	./WEIGHTS//train_weights/Q9NTK5.ENSG00000138430.wgt.RDat	ENSG00000138430.OLA1	2	174937175	175113426	0.0485	rs3813817	-1.676	rs9332424	0.018121	4.29	0.073	159	16	enet	0.036	0.00013	-0.4148	0.678
NA	./WEIGHTS//train_weights/P31040.ENSG00000073578.wgt.RDat	ENSG00000073578.SDHA	5	218356	256815	0.0841	rs11741126	2.31	rs9312983	0.052858	-5.28	0.005	109	6	enet	0.054	2.9e-06	-0.4123	0.68013
NA	./WEIGHTS//train_weights/Q8ND71.ENSG00000171115.wgt.RDat	ENSG00000171115.GIMAP8	7	150147718	150176480	0.0961	rs4725906	2.45	rs7776515	0.03555	-4.1	-0.104	123	4	lasso	0.046	0.00069	0.4106	0.681
NA	./WEIGHTS//train_weights/Q15526.ENSG00000148290.wgt.RDat	ENSG00000148290.SURF1	9	136218610	136223552	0.3124	rs8176720	2.771	rs3124768	0.150394	-8.09	-1.1	143	26	enet	0.24	5.1e-24	0.4107	0.68133
NA	./WEIGHTS//train_weights/Q8NHG7.ENSG00000198168.wgt.RDat	ENSG00000198168.SVIP	11	22835345	22851845	0.0954	rs2470332	-3.43	rs2109681	-0.000967	3.34	-1.699	84	28	enet	0.04	5e-05	-0.40867	0.68278
NA	./WEIGHTS//train_weights/Q92552.ENSG00000113048.wgt.RDat	ENSG00000113048.MRPS27	5	71515236	71616473	0.0643	rs13153166	2.77	rs6831	0.022376	4.48	0.237	113	113	blup	0.035	0.00017	0.4087	0.68278
NA	./WEIGHTS//train_weights/Q86V48.ENSG00000169641.wgt.RDat	ENSG00000169641.LUZP1	1	23410516	23504301	0.0582	rs2144732	1.54	rs683893	0.016782	3.94	0.907	97	97	bslmm	0.042	3.4e-05	0.4088	0.683
NA	./WEIGHTS//train_weights/P78417.ENSG00000148834.wgt.RDat	ENSG00000148834.GSTO1	10	105995114	106027217	0.6068	rs11599497	-1.62	rs11509438	0.38551	-12.34	0.444	87	6	lasso	0.4	6.9e-44	-0.40701	0.684
NA	./WEIGHTS//train_weights/Q99426.ENSG00000105254.wgt.RDat	ENSG00000105254.TBCB	19	36605191	36616849	0.0886	rs2301736	2.08	rs2301736	-0.002587	3.12	2.077	79	16	enet	0.02	0.0032	0.4062	0.6846
NA	./WEIGHTS//train_weights/Q6UXB8.ENSG00000164530.wgt.RDat	ENSG00000164530.PI16	6	36922209	36932613	0.3041	rs4348312	-1.66	rs17624006	0.135614	-7.36	0.053	143	143	bslmm	0.18	6.8e-18	-0.4053	0.685
NA	./WEIGHTS//train_weights/Q66K14.ENSG00000197226.wgt.RDat	ENSG00000197226.TBC1D9B	5	179289066	179334859	0.2838	rs748197	-1.83	rs1298	0.066457	-6.18	0.188	98	98	bslmm	0.22	6.2e-22	0.4047	0.68573
NA	./WEIGHTS//train_weights/Q8N766.ENSG00000127463.wgt.RDat	ENSG00000127463.EMC1	1	19542158	19578046	0.0435	rs3828102	-2.19	rs942182	0.016702	3.96	-1.228	108	3	lasso	0.033	0.00026	-0.4038	0.686
NA	./WEIGHTS//train_weights/Q7L8L6.ENSG00000215251.wgt.RDat	ENSG00000215251.FASTKD5	20	3127165	3140543	0.1914	rs2295547	-4.92	rs16988305	0.145663	-7.49	0.404	84	1	top1	0.15	1.7e-14	-0.404	0.6862
NA	./WEIGHTS//train_weights/O60518.ENSG00000137040.wgt.RDat	ENSG00000137040.RANBP6	9	6011043	6015618	0.0196	rs12378118	-1.759	rs106033	0.010291	-3.55	0.262	67	67	bslmm	0.011	0.025	-0.4039	0.6863
NA	./WEIGHTS//train_weights/O95985.ENSG00000100038.wgt.RDat	ENSG00000100038.TOP3B	22	22311397	22337213	0.0318	rs2283795	4.17	rs240055	0.041406	-4.51	0.441	139	2	lasso	0.043	6.5e-05	-0.40311	0.687
NA	./WEIGHTS//train_weights/Q9H000.ENSG00000075975.wgt.RDat	ENSG00000075975.MKRN2	3	12598513	12625212	0.1604	rs17036843	1.78	rs11710163	0.083024	5.99	0.342	84	21	enet	0.094	7.8e-10	0.4026	0.68722
NA	./WEIGHTS//train_weights/Q96I59.ENSG00000137513.wgt.RDat	ENSG00000137513.NARS2	11	78147007	78285919	0.0814	rs2063724	-2.41	rs4945300	0.039457	-4.22	-1.495	96	96	blup	0.04	6e-05	0.40043	0.68884
NA	./WEIGHTS//train_weights/P07741.ENSG00000198931.wgt.RDat	ENSG00000198931.APRT	16	88875747	88878352	0.1013	rs3826061	2.53	rs1834065	0.0889	-6.15	-0.4	105	1	top1	0.089	2.2e-09	0.4	0.689
NA	./WEIGHTS//train_weights/Q96CM8.ENSG00000167107.wgt.RDat	ENSG00000167107.ACSF2	17	48503519	48552206	0.0563	rs7208018	-2.01	rs736911	0.0484	-4.45	-0.4	113	1	top1	0.048	9.8e-06	0.4	0.689
NA	./WEIGHTS//train_weights/Q9NRG7.ENSG00000100445.wgt.RDat	ENSG00000100445.SDR39U1	14	24908972	24912111	0.0974	rs6573766	3.109	rs10140911	0.071505	-5.43	0.398	152	1	top1	0.072	8.4e-08	-0.398	0.6906
NA	./WEIGHTS//train_weights/Q8IWB7.ENSG00000085449.wgt.RDat	ENSG00000085449.WDFY1	2	224720433	224810104	0.0476	rs10191694	3.055	rs893360	0.02502	-4.16	-1.087	129	129	bslmm	0.031	0.00033	0.3979	0.691
NA	./WEIGHTS//train_weights/Q9UDW1.ENSG00000184076.wgt.RDat	ENSG00000184076.UQCR10	22	30163358	30166402	0.1109	rs2009354	1.67	rs17711508	0.109324	-7.13	0.396	84	1	top1	0.11	2.9e-11	-0.396	0.692
NA	./WEIGHTS//train_weights/Q8NBJ7.ENSG00000129103.wgt.RDat	ENSG00000129103.SUMF2	7	56131695	56148363	0.045	rs13245637	-2.53	rs816396	0.007617	-3.63	-1.292	75	9	enet	0.03	0.00051	0.3954	0.693
NA	./WEIGHTS//train_weights/Q969J3.ENSG00000165714.wgt.RDat	ENSG00000165714.LOH12CR1	12	12510013	12619840	0.0669	rs11054813	2.38	rs3751262	0.009025	-4.6	0.528	158	158	bslmm	0.019	0.0045	-0.3933	0.694
NA	./WEIGHTS//train_weights/O15305.ENSG00000140650.wgt.RDat	ENSG00000140650.PMM2	16	8882680	8943188	0.2324	rs4985056	2.92	rs11074924	0.256	9.63	0.434	146	21	enet	0.28	1.7e-26	0.39224	0.695
NA	./WEIGHTS//train_weights/O75521.ENSG00000198721.wgt.RDat	ENSG00000198721.ECI2	6	4115923	4135831	0.2305	rs9392560	-2.15	rs3177253	0.298491	-10.72	-0.517	131	15	lasso	0.35	6.9e-37	0.392	0.695
NA	./WEIGHTS//train_weights/Q13596.ENSG00000028528.wgt.RDat	ENSG00000028528.SNX1	15	64386322	64438289	0.0276	rs4904	2.71	rs8041372	0.02065	-3.71	-0.392	70	1	top1	0.021	0.003	0.392	0.69506
NA	./WEIGHTS//train_weights/Q15599.ENSG00000065054.wgt.RDat	ENSG00000065054.SLC9A3R2	16	2075357	2089027	0.0959	rs8045887	-4.3	rs7185040	0.0312	-4.47	2.368	63	21	enet	0.033	0.00022	-0.39104	0.696
NA	./WEIGHTS//train_weights/Q9BYW1.ENSG00000133460.wgt.RDat	ENSG00000133460.SLC2A11	22	24198890	24228496	0.3289	rs9624364	-1.93	rs875643	0.174782	-7.97	0.78	125	17	enet	0.22	2.6e-20	-0.38871	0.697
NA	./WEIGHTS//train_weights/Q96Q11.ENSG00000072756.wgt.RDat	ENSG00000072756.TRNT1	3	3168600	3192563	0.076	rs1672735	-2.77	rs3804783	0.075193	5.38	0.389	187	1	top1	0.075	3.9e-08	0.389	0.69728
NA	./WEIGHTS//train_weights/P30084.ENSG00000127884.wgt.RDat	ENSG00000127884.ECHS1	10	135175984	135187193	0.1699	rs11101745	-2.53	rs10776672	0.093161	6.64	0.558	73	73	blup	0.11	4.3e-11	0.38886	0.697382
NA	./WEIGHTS//train_weights/Q9HCJ6.ENSG00000171724.wgt.RDat	ENSG00000171724.VAT1L	16	77822427	78014004	0.0891	rs183721	3.05	rs377212	0.0157	4.41	-0.519	350	350	blup	0.036	0.00012	0.38809	0.698
NA	./WEIGHTS//train_weights/Q13325.ENSG00000152778.wgt.RDat	ENSG00000152778.IFIT5	10	91174343	91180758	0.1526	rs6586196	1.86	rs304500	0.134535	-7.43	-0.378	98	14	enet	0.14	2.9e-14	0.38706	0.69871
NA	./WEIGHTS//train_weights/Q8IWT6.ENSG00000136802.wgt.RDat	ENSG00000136802.LRRC8A	9	131644391	131680318	0.0667	rs2287363	-1.726	rs10988151	0.044508	-4.77	-0.382	73	1	top1	0.045	2.2e-05	0.382	0.70246
NA	./WEIGHTS//train_weights/Q96AX2.ENSG00000172794.wgt.RDat	ENSG00000172794.RAB37	17	72666717	72743474	0.1727	rs16978166	-2.84	rs2280177	0.148	-7.57	-0.379	95	1	top1	0.15	1.1e-14	0.379	0.705
NA	./WEIGHTS//train_weights/Q9BSJ5.ENSG00000141219.wgt.RDat	ENSG00000141219.C17orf80	17	71228372	71245091	0.0458	rs12942652	-2.14	rs11658510	0.0195	3.86	-0.378	97	1	top1	0.02	0.01	-0.378	0.705
NA	./WEIGHTS//train_weights/Q86V85.ENSG00000152749.wgt.RDat	ENSG00000152749.GPR180	13	95254157	95286899	0.0945	rs11843722	2.45	rs1408999	0.052287	-4.47	-0.378	108	1	top1	0.052	1.9e-05	0.378	0.7054
NA	./WEIGHTS//train_weights/Q6P6B7.ENSG00000134461.wgt.RDat	ENSG00000134461.ANKRD16	10	5903580	5931869	0.1429	rs6602360	-2.46	rs7904512	0.022724	-5.06	-0.663	159	159	blup	0.088	6e-08	0.37682	0.706305
NA	./WEIGHTS//train_weights/Q14914.ENSG00000106853.wgt.RDat	ENSG00000106853.PTGR1	9	114312002	114362135	0.1912	rs7036413	2.61	rs3739704	0.142512	7.48	-0.376	111	1	top1	0.14	2.1e-14	-0.376	0.70692
NA	./WEIGHTS//train_weights/O95292.ENSG00000124164.wgt.RDat	ENSG00000124164.VAPB	20	56964178	57026157	0.1016	rs2208087	2.61	rs6128337	0.05348	-5.37	-0.722	152	3	lasso	0.085	5.1e-09	0.375	0.7077
NA	./WEIGHTS//train_weights/Q969S9.ENSG00000164347.wgt.RDat	ENSG00000164347.GFM2	5	74017029	74063196	0.2561	rs2442041	-2.06	rs6453075	0.307039	11.45	-0.214	119	119	bslmm	0.39	1.7e-42	-0.3749	0.70775
NA	./WEIGHTS//train_weights/Q9NWQ8.ENSG00000076641.wgt.RDat	ENSG00000076641.PAG1	8	81880045	82024303	0.0554	rs2016465	2.15	rs10504731	0.038285	4.46	-0.374	166	1	top1	0.038	9.3e-05	-0.374	0.708404
NA	./WEIGHTS//train_weights/Q9BRP4.ENSG00000175575.wgt.RDat	ENSG00000175575.PAAF1	11	73587744	73638790	0.3018	rs11602906	-1.98	rs11235951	-0.000563	3.09	1.244	98	28	enet	0.089	3.2e-09	0.37329	0.70893
NA	./WEIGHTS//train_weights/Q8TB92.ENSG00000146151.wgt.RDat	ENSG00000146151.HMGCLL1	6	55299167	55444012	0.1472	rs10948916	-2.4	rs10498804	0.010805	5.22	-0.071	175	9	enet	0.059	1.5e-06	-0.373	0.709
NA	./WEIGHTS//train_weights/P54709.ENSG00000069849.wgt.RDat	ENSG00000069849.ATP1B3	3	141594966	141645356	0.324	rs9942	2.38	rs10935443	0.242606	9.8	-0.534	95	15	enet	0.26	3.1e-26	-0.3728	0.70933
NA	./WEIGHTS//train_weights/A0PJW6.ENSG00000168569.wgt.RDat	ENSG00000168569.TMEM223	11	62539101	62559493	0.1732	rs12794763	2.91	rs529220	0.06767	-5.27	-0.372	58	1	top1	0.068	2.8e-06	0.372	0.70989
NA	./WEIGHTS//train_weights/P36959.ENSG00000137198.wgt.RDat	ENSG00000137198.GMPR	6	16238811	16295780	0.051	rs7763395	2.35	rs6459467	0.001244	3.91	1.423	110	110	bslmm	0.013	0.015	0.3725	0.71
NA	./WEIGHTS//train_weights/Q9BRK5.ENSG00000078808.wgt.RDat	ENSG00000078808.SDF4	1	1152288	1167411	0.038	rs4970409	-1.87	rs6697886	0.046323	-4.34	-0.369	53	1	top1	0.046	3.6e-05	0.369	0.712
NA	./WEIGHTS//train_weights/O43175.ENSG00000092621.wgt.RDat	ENSG00000092621.PHGDH	1	120202421	120286838	0.1727	rs2282403	-1.98	rs10923897	0.026281	-5.15	-0.182	122	31	enet	0.057	1.8e-06	-0.3678	0.713
NA	./WEIGHTS//train_weights/Q9UK59.ENSG00000138231.wgt.RDat	ENSG00000138231.DBR1	3	137879854	137893791	0.0264	rs405265	-1.96	rs774814	0.002589	3.61	0.107	64	64	bslmm	0.0075	0.07	-0.3671	0.71353
NA	./WEIGHTS//train_weights/P46199.ENSG00000085760.wgt.RDat	ENSG00000085760.MTIF2	2	55463731	55496483	0.0955	rs2576688	2.819	rs13019339	0.015685	3.65	-0.86	102	102	blup	0.021	0.0031	-0.3648	0.715
NA	./WEIGHTS//train_weights/Q69YU5.ENSG00000204954.wgt.RDat	ENSG00000204954.C12orf73	12	104343980	104359486	0.1257	rs7132831	-2.99	rs1165694	0.021322	-4.71	1.539	159	159	blup	0.085	4.2e-07	-0.3601	0.719
NA	./WEIGHTS//train_weights/Q8N9V3.ENSG00000196151.wgt.RDat	ENSG00000196151.WDSUB1	2	160092304	160143310	0.2889	rs11693113	-2.198	rs2159876	0.347498	-11.81	0.338	132	12	lasso	0.4	4e-43	-0.3598	0.719
NA	./WEIGHTS//train_weights/Q5VUM1.ENSG00000154079.wgt.RDat	ENSG00000154079.C6orf57	6	71276620	71299272	0.0254	rs781983	-2.87	rs6455371	0.01537	-3.7	-0.243	76	76	blup	0.016	0.0079	-0.3553	0.722
NA	./WEIGHTS//train_weights/Q8TB45.ENSG00000155792.wgt.RDat	ENSG00000155792.DEPTOR	8	120885957	121063152	0.1065	rs7833407	-1.67	rs4871827	0.120641	6.6	-0.355	178	1	top1	0.12	1.6e-10	-0.355	0.72259
NA	./WEIGHTS//train_weights/Q9NVS9.ENSG00000108439.wgt.RDat	ENSG00000108439.PNPO	17	46018872	46025654	0.6209	rs2074185	2.04	rs17679445	0.509	-14.09	-0.36	104	4	lasso	0.54	2e-64	0.3518	0.725
NA	./WEIGHTS//train_weights/O76003.ENSG00000108010.wgt.RDat	ENSG00000108010.GLRX3	10	131934663	131982785	0.0772	rs7095590	-3.07	rs11017104	0.066355	-5.11	0.351	152	1	top1	0.066	2.4e-07	-0.351	0.725588
NA	./WEIGHTS//train_weights/P57772.ENSG00000132394.wgt.RDat	ENSG00000132394.EEFSEC	3	127872297	128127485	0.0389	rs9851497	-2.65	rs7641133	0.043548	-5.32	-0.344	166	4	lasso	0.049	1.1e-05	0.3504	0.72606
NA	./WEIGHTS//train_weights/Q9BU02.ENSG00000259431.wgt.RDat	ENSG00000259431.THTPA	14	24025216	24029480	0.0481	rs7145877	-2.4	rs34015250	0.067861	-5.14	0.348	90	1	top1	0.068	2.2e-07	-0.348	0.7278
NA	./WEIGHTS//train_weights/Q5NDL2.ENSG00000163378.wgt.RDat	ENSG00000163378.EOGT	3	69024365	69063112	0.0767	rs12714748	3.11	rs2289245	0.057858	-5.14	-0.348	91	1	top1	0.058	2.1e-05	0.348	0.72784
NA	./WEIGHTS//train_weights/P01031.ENSG00000106804.wgt.RDat	ENSG00000106804.C5	9	123714616	123812554	0.0642	rs2146838	-1.338	rs16910300	0.04111	-4.1	0.348	119	1	top1	0.041	5.2e-05	-0.348	0.72784
NA	./WEIGHTS//train_weights/P09211.ENSG00000084207.wgt.RDat	ENSG00000084207.GSTP1	11	67351066	67354131	0.1171	rs682208	-2.05	rs7941648	0.183133	-8.99	-0.186	76	4	lasso	0.21	7.6e-21	0.34588	0.72943
NA	./WEIGHTS//train_weights/P53041.ENSG00000011485.wgt.RDat	ENSG00000011485.PPP5C	19	46850251	46896238	0.0411	rs4803941	-2.12	rs877589	-0.001398	3.22	-0.637	108	108	blup	0.0046	0.1	-0.3456	0.7296
NA	./WEIGHTS//train_weights/Q5MNZ9.ENSG00000070540.wgt.RDat	ENSG00000070540.WIPI1	17	66417089	66453654	0.1085	rs17774757	-2.33	rs11656906	0.118	6.94	0.37	113	6	lasso	0.13	1.5e-12	0.34433	0.731
NA	./WEIGHTS//train_weights/Q96PM5.ENSG00000163743.wgt.RDat	ENSG00000163743.RCHY1	4	76404247	76439974	0.0813	rs6832912	-3.47	rs1478174	0.06234	-5.16	0.711	85	85	bslmm	0.067	4.1e-07	0.3423	0.732
NA	./WEIGHTS//train_weights/Q8N129.ENSG00000166997.wgt.RDat	ENSG00000166997.CNPY4	7	99717236	99723134	0.1217	rs6963345	1.38	rs4727445	0.019106	-4.48	0.541	73	73	blup	0.062	8.2e-07	-0.3429	0.732
NA	./WEIGHTS//train_weights/Q9Y2H5.ENSG00000143850.wgt.RDat	ENSG00000143850.PLEKHA6	1	204187979	204346793	0.0881	rs11240680	2.43	rs4338423	-0.000816	-4.01	-0.619	239	239	bslmm	0.011	0.023	0.3397	0.734
NA	./WEIGHTS//train_weights/Q9ULV4.ENSG00000110880.wgt.RDat	ENSG00000110880.CORO1C	12	109038885	109125372	0.1602	rs8179109	-1.91	rs1861642	0.054317	-6	-0.21	129	129	bslmm	0.089	2.1e-09	0.3389	0.735
NA	./WEIGHTS//train_weights/Q6P9B6.ENSG00000140950.wgt.RDat	ENSG00000140950.TLDC1	16	84511681	84587639	0.16	rs8055365	-2.85	rs422918	0.0609	-5.86	1.07	270	270	blup	0.12	2.5e-12	0.33866	0.735
NA	./WEIGHTS//train_weights/Q9H2U2.ENSG00000138777.wgt.RDat	ENSG00000138777.PPA2	4	106290234	106395238	0.3249	rs4699177	-1.65	rs17617811	0.03835	-6.2	0.414	144	144	blup	0.18	2.2e-18	-0.3389	0.735
NA	./WEIGHTS//train_weights/P00966.ENSG00000130707.wgt.RDat	ENSG00000130707.ASS1	9	133320316	133376661	0.2096	rs17147029	2.371	rs12377651	0.052606	5.89	-0.306	145	145	bslmm	0.16	4.4e-16	-0.3383	0.7351
NA	./WEIGHTS//train_weights/Q8NBF2.ENSG00000196865.wgt.RDat	ENSG00000196865.NHLRC2	10	115614420	115676953	0.0511	rs10567	2.09	rs7913176	0.026256	-4.56	-0.338	129	1	top1	0.026	0.00094	0.338	0.735363
NA	./WEIGHTS//train_weights/Q9Y2B0.ENSG00000257727.wgt.RDat	ENSG00000257727.CNPY2	12	56703626	56710120	0.0455	rs872103	-1.88	rs773652	0.065144	5.82	0.549	41	41	bslmm	0.066	3.2e-07	0.3373	0.736
NA	./WEIGHTS//train_weights/Q96DE0.ENSG00000198585.wgt.RDat	ENSG00000198585.NUDT16	3	131100515	131107674	0.0965	rs17275526	-1.37	rs16836573	0.07291	-5.85	-0.335	69	1	top1	0.073	8.6e-08	0.335	0.73763
NA	./WEIGHTS//train_weights/Q9NUJ1.ENSG00000144827.wgt.RDat	ENSG00000144827.ABHD10	3	111697857	111712210	0.1282	rs4682327	-2.47	rs17429033	0.104133	-7.13	0.696	157	3	lasso	0.1	7.9e-11	-0.334	0.73838
NA	./WEIGHTS//train_weights/P27544.ENSG00000223802.wgt.RDat	ENSG00000223802.CERS1	19	18979361	19007536	0.0441	rs757115	1.46	rs7250622	0.005652	-3.65	-0.024	60	60	bslmm	0.029	0.00062	-0.3339	0.7384
NA	./WEIGHTS//train_weights/A2RTX5.ENSG00000185418.wgt.RDat	ENSG00000185418.TARSL2	15	102193801	102264807	0.0969	rs11247320	2.54	rs558555	0.11103	6.77	-0.487	104	104	blup	0.12	1.9e-12	-0.33333	0.73889
NA	./WEIGHTS//train_weights/Q08493.ENSG00000105650.wgt.RDat	ENSG00000105650.PDE4C	19	18318771	18366229	0.0911	rs8108398	3.38	rs172043	0.105579	5.28	-0.183	133	10	enet	0.11	3.8e-08	0.3331	0.739
NA	./WEIGHTS//train_weights/Q6PH85.ENSG00000150401.wgt.RDat	ENSG00000150401.DCUN1D2	13	114110134	114145267	0.0566	rs9549785	-3.05	rs6577052	0.045619	-4.26	0.332	123	1	top1	0.046	5.1e-05	-0.332	0.7399
NA	./WEIGHTS//train_weights/Q16836.ENSG00000138796.wgt.RDat	ENSG00000138796.HADH	4	108910870	108956331	0.1106	rs9997219	1.41	rs2267842	0.02676	4.12	1.276	94	94	bslmm	0.061	7.9e-07	0.3314	0.74
NA	./WEIGHTS//train_weights/P53597.ENSG00000163541.wgt.RDat	ENSG00000163541.SUCLG1	2	84650647	84687169	0.0301	rs11690708	-2.024	rs1460698	0.02464	3.8	-0.093	63	4	enet	0.037	0.00012	0.3303	0.741
NA	./WEIGHTS//train_weights/O15162.ENSG00000188313.wgt.RDat	ENSG00000188313.PLSCR1	3	146232967	146262651	0.1021	rs13088225	1.32	rs343320	0.028837	-4.52	1.028	129	15	enet	0.05	2.4e-05	-0.3299	0.74145
NA	./WEIGHTS//train_weights/Q9Y2W1.ENSG00000054118.wgt.RDat	ENSG00000054118.THRAP3	1	36690017	36770958	0.0538	rs4653186	-2.87	rs6680494	0.057306	5.08	-0.257	71	71	blup	0.06	9.5e-07	0.3298	0.742
NA	./WEIGHTS//train_weights/Q9NYK5.ENSG00000154719.wgt.RDat	ENSG00000154719.MRPL39	21	26957968	26979829	0.0687	rs2829781	2.25	rs12482056	0.004407	-3.73	-0.384	84	84	bslmm	0.0094	0.033	-0.327	0.7435
NA	./WEIGHTS//train_weights/O15254.ENSG00000087008.wgt.RDat	ENSG00000087008.ACOX3	4	8368009	8442450	0.1856	rs6830523	2.71	rs3796751	0.08131	5.67	0.044	182	31	enet	0.13	5.2e-13	0.3267	0.744
NA	./WEIGHTS//train_weights/Q96HP4.ENSG00000154814.wgt.RDat	ENSG00000154814.OXNAD1	3	16306706	16391806	0.2398	rs3796301	-2.68	rs2292614	0.269165	-9.67	-0.659	179	9	lasso	0.32	3.2e-29	0.324	0.74591
NA	./WEIGHTS//train_weights/Q13740.ENSG00000170017.wgt.RDat	ENSG00000170017.ALCAM	3	105085753	105295744	0.0839	rs10933821	3.09	rs6771987	0.007563	-4.1	-1.768	171	15	enet	0.033	0.00023	0.3233	0.7465
NA	./WEIGHTS//train_weights/O94760.ENSG00000153904.wgt.RDat	ENSG00000153904.DDAH1	1	85784164	86043933	0.0748	rs12129013	3.47	rs233109	0.03045	4.71	0.033	255	255	blup	0.052	4.5e-06	-0.3167	0.751
NA	./WEIGHTS//train_weights/Q9BV79.ENSG00000116353.wgt.RDat	ENSG00000116353.MECR	1	29519385	29557454	0.24	rs12045750	2.12	rs547976	0.078917	5.91	-0.661	101	41	enet	0.13	5.7e-13	-0.3175	0.751
NA	./WEIGHTS//train_weights/P34896.ENSG00000176974.wgt.RDat	ENSG00000176974.SHMT1	17	18231187	18266856	0.2789	rs2746027	-1.47	rs2461838	0.315	10.95	-0.517	58	4	lasso	0.37	9.1e-40	-0.3168	0.751
NA	./WEIGHTS//train_weights/Q6NUQ1.ENSG00000135249.wgt.RDat	ENSG00000135249.RINT1	7	105172532	105208124	0.0306	rs7799245	-2.78	rs1721498	0.024456	-4.34	0.317	88	1	top1	0.024	0.0014	-0.317	0.751
NA	./WEIGHTS//train_weights/Q53H82.ENSG00000147592.wgt.RDat	ENSG00000147592.LACTB2	8	71547553	71581409	0.0855	rs268600	-1.88	rs12681420	0.08932	6.6	0.1	66	7	enet	0.12	5.7e-12	0.3155	0.752352
NA	./WEIGHTS//train_weights/P07947.ENSG00000176105.wgt.RDat	ENSG00000176105.YES1	18	721588	812547	0.0629	rs1058151	2.29	rs2847605	-0.00125	-3.21	-1.154	181	181	bslmm	0.015	0.01	-0.315	0.75292
NA	./WEIGHTS//train_weights/O95149.ENSG00000169371.wgt.RDat	ENSG00000169371.SNUPN	15	75890424	75918810	0.0617	rs12324230	-1.83	rs8025681	0.02708	-3.91	0.314	68	1	top1	0.027	0.0022	-0.314	0.75352
NA	./WEIGHTS//train_weights/P13716.ENSG00000148218.wgt.RDat	ENSG00000148218.ALAD	9	116148597	116163613	0.3048	rs10817488	1.952	rs1805313	0.012431	-4.21	1.666	119	25	enet	0.13	2.3e-13	0.3137	0.75377
NA	./WEIGHTS//train_weights/Q9NXL6.ENSG00000072858.wgt.RDat	ENSG00000072858.SIDT1	3	113251143	113348425	0.3148	rs4682499	-2.3	rs6808932	0.079958	6.14	-0.296	114	19	enet	0.15	5.7e-14	0.313	0.75426
NA	./WEIGHTS//train_weights/P15848.ENSG00000113273.wgt.RDat	ENSG00000113273.ARSB	5	78073032	78281910	0.2876	rs163215	-3.15	rs12522878	0.188247	-8.73	0.187	227	28	enet	0.29	3.9e-30	-0.3127	0.75451
NA	./WEIGHTS//train_weights/O75600.ENSG00000100116.wgt.RDat	ENSG00000100116.GCAT	22	38203912	38213183	0.3805	rs17752670	-1.63	rs5756825	0.340386	11.25	0.058	60	6	lasso	0.4	5.9e-43	-0.31214	0.755
NA	./WEIGHTS//train_weights/Q8WVM8.ENSG00000092108.wgt.RDat	ENSG00000092108.SCFD1	14	31091318	31205018	0.1513	rs12888555	-2.619	rs12434151	0.26207	10.22	-0.069	138	138	bslmm	0.27	1.6e-27	-0.3107	0.756
NA	./WEIGHTS//train_weights/P42765.ENSG00000167315.wgt.RDat	ENSG00000167315.ACAA2	18	47309869	47340330	0.0885	rs8088428	-2.03	rs3889856	0.0362	4.52	0.97	133	133	blup	0.048	1.2e-05	0.309	0.75734
NA	./WEIGHTS//train_weights/Q6P996.ENSG00000179889.wgt.RDat	ENSG00000179889.PDXDC1	16	15068448	15233196	0.0414	rs1135999	-1.18	rs4985155	0.00328	-3.69	-0.75	31	31	blup	0.015	0.0094	0.30836	0.758
NA	./WEIGHTS//train_weights/P13804.ENSG00000140374.wgt.RDat	ENSG00000140374.ETFA	15	76507696	76603813	0.0561	rs2955764	1.67	rs2456046	0.04098	-5.04	0.664	116	116	blup	0.06	9e-07	-0.30804	0.75805
NA	./WEIGHTS//train_weights/Q8N1K5.ENSG00000172673.wgt.RDat	ENSG00000172673.THEMIS	6	128029217	128239776	0.1248	rs17055025	-1.57	rs675531	0.118122	6.78	-0.928	144	144	blup	0.13	5.8e-13	-0.3036	0.761
NA	./WEIGHTS//train_weights/P54687.ENSG00000060982.wgt.RDat	ENSG00000060982.BCAT1	12	24964295	25102393	0.1244	rs976436	2.64	rs1872644	0.021301	-4.34	-2.168	204	204	bslmm	0.042	3.3e-05	0.3013	0.763
NA	./WEIGHTS//train_weights/P46108.ENSG00000167193.wgt.RDat	ENSG00000167193.CRK	17	1323983	1366456	0.0352	rs12944784	-2.67	rs16946807	-0.00175	3.39	0.553	92	92	blup	0.00044	0.28	0.30122	0.763
NA	./WEIGHTS//train_weights/Q8NHU6.ENSG00000196116.wgt.RDat	ENSG00000196116.TDRD7	9	100174232	100258407	0.1076	rs10982508	2.61	rs10817606	0.09829	-6.04	0.299	142	1	top1	0.098	4.3e-09	-0.299	0.76494
NA	./WEIGHTS//train_weights/Q8IXI1.ENSG00000140983.wgt.RDat	ENSG00000140983.RHOT2	16	718086	724174	0.1059	rs12443803	1.69	rs1139897	0.175	-8.57	-0.578	85	5	lasso	0.2	1.1e-19	0.2987	0.765
NA	./WEIGHTS//train_weights/Q96Q06.ENSG00000167676.wgt.RDat	ENSG00000167676.PLIN4	19	4502204	4517716	0.0829	rs2288932	-2.65	rs10406628	0.021219	4.55	-0.514	89	4	lasso	0.049	8e-06	-0.2987	0.7652
NA	./WEIGHTS//train_weights/O75096.ENSG00000134569.wgt.RDat	ENSG00000134569.LRP4	11	46878419	46940193	0.0423	rs12277006	-1.08	rs2306029	0.002661	3.44	0.279	66	66	bslmm	0.011	0.025	0.2975	0.76608
NA	./WEIGHTS//train_weights/Q96C86.ENSG00000110063.wgt.RDat	ENSG00000110063.DCPS	11	126173647	126215644	0.1921	rs2282580	-2.55	rs11220426	0.038429	-4.89	-0.313	145	145	bslmm	0.088	2.7e-09	-0.29705	0.76642
NA	./WEIGHTS//train_weights/Q8WXE9.ENSG00000140022.wgt.RDat	ENSG00000140022.STON2	14	81727000	81902809	0.0573	rs961096	2.732	rs6574636	0.048515	4.63	-0.295	128	1	top1	0.049	9.7e-06	-0.295	0.768
NA	./WEIGHTS//train_weights/Q03113.ENSG00000146535.wgt.RDat	ENSG00000146535.GNA12	7	2767746	2883958	0.0581	rs11765386	3.6	rs208358	0.08204	-5.68	0.295	165	1	top1	0.082	9.4e-09	-0.295	0.768
NA	./WEIGHTS//train_weights/Q7Z4H3.ENSG00000111906.wgt.RDat	ENSG00000111906.HDDC2	6	125541108	125623282	0.3442	rs1547786	1.98	rs987168	0.372081	-12.04	-0.169	116	7	lasso	0.38	2.4e-41	0.2926	0.77
NA	./WEIGHTS//train_weights/Q6FI81.ENSG00000005194.wgt.RDat	ENSG00000005194.CIAPIN1	16	57462081	57481440	0.0489	rs9925562	1.87	rs17546208	0.0135	-3.47	0.124	98	98	blup	0.034	0.00021	-0.29042	0.771
NA	./WEIGHTS//train_weights/Q7LG56.ENSG00000048392.wgt.RDat	ENSG00000048392.RRM2B	8	103216730	103251346	0.1053	rs2067029	2.74	rs1052071	0.095003	6.85	0.608	109	109	blup	0.12	2.8e-12	0.2888	0.772753
NA	./WEIGHTS//train_weights/Q14643.ENSG00000150995.wgt.RDat	ENSG00000150995.ITPR1	3	4535032	4889524	0.0717	rs4685821	2.47	rs7639802	0.038508	-4.34	-0.288	390	1	top1	0.039	7.6e-05	0.288	0.77335
NA	./WEIGHTS//train_weights/P25685.ENSG00000132002.wgt.RDat	ENSG00000132002.DNAJB1	19	14625582	14640582	0.0686	rs10416904	2.44	rs8104440	0.02778	4.41	0.132	75	3	lasso	0.035	0.00016	0.2878	0.7735
NA	./WEIGHTS//train_weights/O43766.ENSG00000121897.wgt.RDat	ENSG00000121897.LIAS	4	39460620	39479273	0.1213	rs13144464	2.21	rs17431867	0.01651	-4.4	-0.391	96	6	enet	0.057	6.3e-06	0.287	0.774
NA	./WEIGHTS//train_weights/Q8NBL1.ENSG00000163389.wgt.RDat	ENSG00000163389.POGLUT1	3	119187785	119213555	0.073	rs1880661	2.75	rs9872589	0.046734	-4.56	0.286	143	1	top1	0.047	2.4e-05	-0.286	0.77488
NA	./WEIGHTS//train_weights/A6NLU5.ENSG00000187135.wgt.RDat	ENSG00000187135.VSTM2B	19	30017406	30055386	0.1035	rs11669470	2.45	rs8106720	-0.0029	3.28	-0.756	158	158	bslmm	0.0049	0.11	0.2839	0.7765
NA	./WEIGHTS//train_weights/Q9H3U1.ENSG00000140553.wgt.RDat	ENSG00000140553.UNC45A	15	91473410	91497323	0.0403	rs1266483	-1.65	rs12148829	0.01547	4.06	-0.282	125	1	top1	0.015	0.009	-0.282	0.77794
NA	./WEIGHTS//train_weights/Q14166.ENSG00000100304.wgt.RDat	ENSG00000100304.TTLL12	22	43562628	43583139	0.2783	rs138974	-2.63	rs47340	0.095506	7.29	0.652	164	27	enet	0.22	2.4e-22	-0.28247	0.778
NA	./WEIGHTS//train_weights/Q9Y4E1.ENSG00000172661.wgt.RDat	ENSG00000172661.FAM21C	10	46222648	46288409	0.1014	rs10751386	-1.97	rs7091141	0.070002	-5.3	-0.281	22	1	top1	0.07	6.5e-07	0.281	0.77871
NA	./WEIGHTS//train_weights/P56159.ENSG00000151892.wgt.RDat	ENSG00000151892.GFRA1	10	117816444	118032979	0.1703	rs10787616	-2.78	rs12570087	0.142488	7.38	0.377	250	29	enet	0.19	6.6e-18	-0.27961	0.779775
NA	./WEIGHTS//train_weights/Q06203.ENSG00000128059.wgt.RDat	ENSG00000128059.PPAT	4	57259528	57301781	0.0893	rs9684298	-1.54	rs6836118	0.09587	6.22	0.279	103	1	top1	0.096	5.1e-10	0.279	0.78
NA	./WEIGHTS//train_weights/Q86V21.ENSG00000081760.wgt.RDat	ENSG00000081760.AACS	12	125549925	125627873	0.0905	rs7961498	3.79	rs10846823	0.060985	5.94	0.333	126	6	lasso	0.1	8.3e-11	0.2763	0.782
NA	./WEIGHTS//train_weights/Q8NCN5.ENSG00000090857.wgt.RDat	ENSG00000090857.PDPR	16	70147529	70195203	0.0796	rs4985407	2.22	rs4985520	0.00245	2.66	-1.173	15	15	bslmm	0.017	0.0061	-0.27588	0.783
NA	./WEIGHTS//train_weights/P36222.ENSG00000133048.wgt.RDat	ENSG00000133048.CHI3L1	1	203148059	203155877	0.0744	rs903358	2.66	rs10399931	-0.001105	-3.1	0.177	131	131	bslmm	0.023	0.007	-0.274	0.784
NA	./WEIGHTS//train_weights/P54886.ENSG00000059573.wgt.RDat	ENSG00000059573.ALDH18A1	10	97365696	97416463	0.2318	rs10882619	2.6	rs2275272	0.153972	-8.29	-0.687	157	24	enet	0.19	4.5e-19	0.27297	0.784878
NA	./WEIGHTS//train_weights/Q96S19.ENSG00000130731.wgt.RDat	ENSG00000130731.C16orf13	16	684429	686358	0.2505	rs13338503	-2.68	rs7184664	-0.000536	-2.87	0.519	90	21	enet	0.033	0.00022	0.27187	0.786
NA	./WEIGHTS//train_weights/P21399.ENSG00000122729.wgt.RDat	ENSG00000122729.ACO1	9	32384618	32454767	0.1093	rs10738886	-2.364	rs1133071	0.092535	6.13	-0.271	137	1	top1	0.093	1e-09	-0.271	0.78639
NA	./WEIGHTS//train_weights/P07902.ENSG00000213930.wgt.RDat	ENSG00000213930.GALT	9	34638130	34651032	0.092	rs3176817	2.058	rs7037232	0.075778	-5.5	-0.332	88	7	lasso	0.078	3e-08	0.2678	0.78885
NA	./WEIGHTS//train_weights/Q07021.ENSG00000108561.wgt.RDat	ENSG00000108561.C1QBP	17	5336097	5352150	0.0652	rs1806264	2.15	rs3026106	0.0419	4.16	0.266	110	1	top1	0.042	3.8e-05	0.266	0.79
NA	./WEIGHTS//train_weights/Q9UHK6.ENSG00000242110.wgt.RDat	ENSG00000242110.AMACR	5	33986283	34008220	0.2577	rs10461928	-2.62	rs4866402	0.233356	-8.92	0.182	97	8	lasso	0.28	1.7e-22	-0.2661	0.79015
NA	./WEIGHTS//train_weights/O60636.ENSG00000134198.wgt.RDat	ENSG00000134198.TSPAN2	1	115590632	115632121	0.1233	rs12742348	2.6	rs12034918	0.055602	4.53	0.262	139	1	top1	0.056	0.00037	0.262	0.793
NA	./WEIGHTS//train_weights/Q8IYK4.ENSG00000198756.wgt.RDat	ENSG00000198756.COLGALT2	1	183898796	184006863	0.0987	rs3010062	2.12	rs1327136	0.000965	-3.65	0.385	177	177	bslmm	0.021	0.0059	-0.2614	0.794
NA	./WEIGHTS//train_weights/Q96A23.ENSG00000196353.wgt.RDat	ENSG00000196353.CPNE4	3	131252399	132004254	0.0619	rs6439301	2.99	rs9834560	0.041428	-4.41	0.261	537	1	top1	0.041	4.2e-05	-0.261	0.79409
NA	./WEIGHTS//train_weights/Q9UG56.ENSG00000241878.wgt.RDat	ENSG00000241878.PISD	22	32014477	32058418	0.6745	rs16989291	-1.94	rs1076674	0.039254	5	-0.529	89	26	enet	0.24	8.8e-24	-0.25936	0.795
NA	./WEIGHTS//train_weights/Q9Y5A7.ENSG00000013374.wgt.RDat	ENSG00000013374.NUB1	7	151038785	151075535	0.0579	rs6963048	3.12	rs394259	0.006942	3.82	-0.148	140	14	enet	0.043	3.3e-05	0.2597	0.795
NA	./WEIGHTS//train_weights/Q03013.ENSG00000168765.wgt.RDat	ENSG00000168765.GSTM4	1	110198703	110208118	0.0769	rs17598321	4.16	rs670439	0.006708	-4.44	1.515	83	83	blup	0.039	7.9e-05	-0.258	0.796
NA	./WEIGHTS//train_weights/Q4G0X4.ENSG00000188997.wgt.RDat	ENSG00000188997.KCTD21	11	77882295	77899868	0.0932	rs1981405	-2.6	rs550458	0.055619	-4.32	0.258	99	1	top1	0.056	2.9e-05	-0.258	0.79641
NA	./WEIGHTS//train_weights/Q8TAT6.ENSG00000182446.wgt.RDat	ENSG00000182446.NPLOC4	17	79523913	79615495	0.0733	rs1139405	2.8	rs35646762	0.00733	3.86	1.01	117	117	bslmm	0.014	0.013	-0.2575	0.797
NA	./WEIGHTS//train_weights/Q9UBQ7.ENSG00000137106.wgt.RDat	ENSG00000137106.GRHPR	9	37422663	37436987	0.095	rs7025809	3.021	rs10814535	0.059205	4.85	-1.453	115	115	bslmm	0.06	8.8e-07	-0.2567	0.79738
NA	./WEIGHTS//train_weights/O43447.ENSG00000171960.wgt.RDat	ENSG00000171960.PPIH	1	43124096	43142429	0.0469	rs2816594	-1.21	rs12145783	0.028852	-4.25	0.265	76	5	lasso	0.031	0.00038	-0.2554	0.798
NA	./WEIGHTS//train_weights/Q3KRA6.ENSG00000186132.wgt.RDat	ENSG00000186132.C2orf76	2	120059801	120124404	0.1513	rs1530561	-2.321	rs6712455	0.175691	7.1	0.252	157	1	top1	0.18	4.8e-13	0.252	0.801
NA	./WEIGHTS//train_weights/Q96E17.ENSG00000152932.wgt.RDat	ENSG00000152932.RAB3C	5	57878048	58155213	0.1053	rs10514852	2.32	rs292969	0.06289	5.03	0.251	236	1	top1	0.063	5e-07	0.251	0.80181
NA	./WEIGHTS//train_weights/Q96B23.ENSG00000152242.wgt.RDat	ENSG00000152242.C18orf25	18	43753519	43846949	0.0695	rs9965812	1.69	rs7506126	0.000244	-3.71	0.523	99	99	blup	0.033	0.00024	-0.251	0.80205
NA	./WEIGHTS//train_weights/Q9C037.ENSG00000146833.wgt.RDat	ENSG00000146833.TRIM4	7	99474581	99517223	0.0469	rs651430	-1.72	rs2023548	0.019996	-4.23	-0.083	80	80	bslmm	0.041	0.00037	0.2485	0.804
NA	./WEIGHTS//train_weights/Q86TX2.ENSG00000184227.wgt.RDat	ENSG00000184227.ACOT1	14	74003818	74010498	0.3642	rs1540343	-2.052	rs1074501	0.231882	9.44	0.121	75	22	enet	0.37	3.2e-40	-0.2473	0.8047
NA	./WEIGHTS//train_weights/Q5TEU4.ENSG00000101247.wgt.RDat	ENSG00000101247.NDUFAF5	20	13765596	13799067	0.0766	rs6079161	-2.67	rs1999112	0.055401	-4.75	-0.004	95	95	bslmm	0.057	1.8e-06	0.246	0.8057
NA	./WEIGHTS//train_weights/O75037.ENSG00000116852.wgt.RDat	ENSG00000116852.KIF21B	1	200938520	200992828	0.2063	rs12239772	2.18	rs502658	0.166284	8.31	0.604	151	14	enet	0.2	4.1e-20	0.2431	0.808
NA	./WEIGHTS//train_weights/Q12912.ENSG00000118308.wgt.RDat	ENSG00000118308.LRMP	12	25173936	25261268	0.0456	rs7316187	2.67	rs11047795	-0.002165	3.58	-1.124	148	148	blup	0.012	0.022	0.2434	0.808
NA	./WEIGHTS//train_weights/P0C0L4.ENSG00000244731.wgt.RDat	ENSG00000244731.C4A	6	31949801	31970458	0.0918	rs17201560	-1.98	rs4151651	0.029706	3.64	0.53	70	70	bslmm	0.036	0.00012	0.2424	0.808
NA	./WEIGHTS//train_weights/Q9NZ52.ENSG00000125447.wgt.RDat	ENSG00000125447.GGA3	17	73232694	73258444	0.0955	rs729405	3.1	rs4789161	0.00649	-3.05	1.686	49	49	bslmm	0.038	8.8e-05	-0.2416	0.809
NA	./WEIGHTS//train_weights/Q86TI0.ENSG00000065882.wgt.RDat	ENSG00000065882.TBC1D1	4	37892708	38140796	0.1549	rs1863329	-2.69	rs12511756	0.08261	5.67	-0.644	193	6	lasso	0.15	4.2e-15	-0.2421	0.809
NA	./WEIGHTS//train_weights/Q14165.ENSG00000110917.wgt.RDat	ENSG00000110917.MLEC	12	121124672	121139667	0.0592	rs541619	-2.63	rs10774564	0.013106	-4.04	0.275	105	105	blup	0.023	0.002	-0.2396	0.811
NA	./WEIGHTS//train_weights/Q9P2U8.ENSG00000091664.wgt.RDat	ENSG00000091664.SLC17A6	11	22359643	22401049	0.0633	rs2671116	2.55	rs11026523	0.042463	-4.4	0.237	96	1	top1	0.042	3.4e-05	-0.237	0.81266
NA	./WEIGHTS//train_weights/Q8N3E9.ENSG00000161714.wgt.RDat	ENSG00000161714.PLCD3	17	43186335	43210721	0.0368	rs7224944	-3.66	rs2285427	0.0073	-3.52	3.442	96	96	blup	0.015	0.01	0.23697	0.813
NA	./WEIGHTS//train_weights/Q9HBL7.ENSG00000107020.wgt.RDat	ENSG00000107020.PLGRKT	9	5357973	5437878	0.1714	rs10815236	-3.613	rs2890658	0.017229	-4.75	-1.988	169	21	enet	0.074	6.9e-08	-0.2353	0.81398
NA	./WEIGHTS//train_weights/P49773.ENSG00000169567.wgt.RDat	ENSG00000169567.HINT1	5	130494720	130507428	0.0801	rs2420148	-1.63	rs3891636	0.07713	5.5	0.235	67	1	top1	0.077	2.6e-08	0.235	0.81421
NA	./WEIGHTS//train_weights/O75477.ENSG00000107566.wgt.RDat	ENSG00000107566.ERLIN1	10	101909851	101948091	0.2979	rs11190396	1.73	rs2862954	0.229629	-9.44	-0.232	85	1	top1	0.23	3.3e-23	0.232	0.816538
NA	./WEIGHTS//train_weights/Q13242.ENSG00000111786.wgt.RDat	ENSG00000111786.SRSF9	12	120899471	120907596	0.2644	rs3901251	1.52	rs11065126	0.121597	-7.06	-0.23	82	1	top1	0.12	2.1e-12	0.23	0.818
NA	./WEIGHTS//train_weights/Q9BXS0.ENSG00000188517.wgt.RDat	ENSG00000188517.COL25A1	4	109731877	110223813	0.209	rs965935	-2.47	rs11937243	0.0055	4.47	-0.64	292	292	bslmm	0.029	0.0058	0.2301	0.818
NA	./WEIGHTS//train_weights/Q96GA7.ENSG00000139410.wgt.RDat	ENSG00000139410.SDSL	12	113860042	113876081	0.0559	rs4766686	-1.82	rs11832641	0.020456	3.89	0.595	65	65	bslmm	0.054	3.2e-06	0.2268	0.821
NA	./WEIGHTS//train_weights/Q9NQ48.ENSG00000163818.wgt.RDat	ENSG00000163818.LZTFL1	3	45864808	45957534	0.1409	rs2673059	-3.21	rs1129183	0.075634	-5.5	0.221	106	1	top1	0.076	3.6e-08	-0.221	0.82509
NA	./WEIGHTS//train_weights/P54750.ENSG00000115252.wgt.RDat	ENSG00000115252.PDE1A	2	183004763	183387919	0.0589	rs16823201	-3.2	rs11884886	0.022633	4.66	1.084	256	9	enet	0.023	0.0019	-0.2195	0.826
NA	./WEIGHTS//train_weights/Q9H9P8.ENSG00000087299.wgt.RDat	ENSG00000087299.L2HGDH	14	50704281	50779266	0.0668	rs10134448	1.798	rs12894758	0.044654	-5.33	0.667	106	106	blup	0.056	2.2e-06	0.2194	0.8263
NA	./WEIGHTS//train_weights/P09467.ENSG00000165140.wgt.RDat	ENSG00000165140.FBP1	9	97365415	97402531	0.1034	rs2993961	3.269	rs16910850	0.02019	4.52	0.303	112	112	bslmm	0.073	3.2e-06	0.2192	0.8265
NA	./WEIGHTS//train_weights/Q5VVQ6.ENSG00000180667.wgt.RDat	ENSG00000180667.YOD1	1	207217194	207226325	0.0391	rs9943268	-1.45	rs2883211	0.029666	-4.43	0.217	89	1	top1	0.03	0.00052	-0.217	0.828
NA	./WEIGHTS//train_weights/P15259.ENSG00000164708.wgt.RDat	ENSG00000164708.PGAM2	7	44102326	44105186	0.1985	rs10951757	-3.45	rs17546439	0.042973	-5.4	0.777	62	62	bslmm	0.073	8.6e-08	-0.2166	0.828
NA	./WEIGHTS//train_weights/Q8NFX7.ENSG00000168952.wgt.RDat	ENSG00000168952.STXBP6	14	25278862	25519503	0.276	rs8021822	2.623	rs7157481	0.083051	-6.86	0.749	285	33	enet	0.25	9.1e-26	-0.2161	0.8289
NA	./WEIGHTS//train_weights/Q9GZT4.ENSG00000167720.wgt.RDat	ENSG00000167720.SRR	17	2206677	2228554	0.1658	rs2286881	2.06	rs12450028	0.192	-8.8	0.215	112	1	top1	0.19	2.7e-19	-0.215	0.83
NA	./WEIGHTS//train_weights/Q5T1C6.ENSG00000159445.wgt.RDat	ENSG00000159445.THEM4	1	151846060	151882284	0.1876	rs3811414	-2.35	rs16833668	0.295299	-10.76	0.188	104	6	lasso	0.31	2e-32	-0.2139	0.831
NA	./WEIGHTS//train_weights/Q9Y2Z4.ENSG00000139131.wgt.RDat	ENSG00000139131.YARS2	12	32880424	32908836	0.0418	rs4931044	-3.25	rs7302970	0.068822	-5.47	0.213	109	1	top1	0.069	1.5e-07	-0.213	0.831
NA	./WEIGHTS//train_weights/Q9NTX5.ENSG00000093144.wgt.RDat	ENSG00000093144.ECHDC1	6	127609855	127664754	0.0569	rs9401939	1.35	rs3823043	0.001639	3.26	0.419	65	65	blup	0.017	0.0065	0.212	0.832
NA	./WEIGHTS//train_weights/P27707.ENSG00000156136.wgt.RDat	ENSG00000156136.DCK	4	71858255	71896631	0.1389	rs11941079	4.36	rs6826930	0.12187	-7.51	0.171	63	63	bslmm	0.14	4.2e-14	0.2109	0.833
NA	./WEIGHTS//train_weights/Q9NRP2.ENSG00000103121.wgt.RDat	ENSG00000103121.CMC2	16	81009698	81053875	0.2117	rs13861	-2.53	rs2602424	0.243	-10.21	-0.305	142	7	lasso	0.27	2.6e-27	0.2101	0.834
NA	./WEIGHTS//train_weights/P48147.ENSG00000085377.wgt.RDat	ENSG00000085377.PREP	6	105725440	105850959	0.0742	rs7745815	2.08	rs717324	0.019385	-4.49	-0.209	120	1	top1	0.019	0.0039	0.209	0.834
NA	./WEIGHTS//train_weights/Q96PE5.ENSG00000197430.wgt.RDat	ENSG00000197430.OPALIN	10	98102973	98119092	0.0565	rs7077344	2.04	rs1923702	0.006252	-3.55	0.489	127	127	bslmm	0.041	4.1e-05	-0.20895	0.834491
NA	./WEIGHTS//train_weights/Q86VW2.ENSG00000240771.wgt.RDat	ENSG00000240771.ARHGEF25	12	58003963	58013162	0.0626	rs11172254	-2.88	rs1806652	0.057447	4.97	-0.204	84	1	top1	0.057	2.5e-06	-0.204	0.838
NA	./WEIGHTS//train_weights/P49753.ENSG00000119673.wgt.RDat	ENSG00000119673.ACOT2	14	74034324	74042357	0.3668	rs11626122	1.364	rs1074501	0.252533	9.84	0.121	77	26	enet	0.39	1.5e-42	-0.2044	0.838
NA	./WEIGHTS//train_weights/Q99570.ENSG00000196455.wgt.RDat	ENSG00000196455.PIK3R4	3	130397779	130465673	0.0262	rs11708087	-2.46	rs13064233	0.011925	3.28	0.063	81	81	blup	0.016	0.0083	-0.2029	0.83923
NA	./WEIGHTS//train_weights/P29323.ENSG00000133216.wgt.RDat	ENSG00000133216.EPHB2	1	23037332	23241818	0.0819	rs294223	2.46	rs12723359	0.040804	-5.01	0.622	172	172	blup	0.05	6.6e-06	0.2022	0.84
NA	./WEIGHTS//train_weights/Q9P1Z2.ENSG00000012822.wgt.RDat	ENSG00000012822.CALCOCO1	12	54104903	54121529	0.0827	rs7311902	2.44	rs17102221	0.087533	6.01	0.202	102	1	top1	0.088	3e-09	0.202	0.84
NA	./WEIGHTS//train_weights/A8MXV4.ENSG00000213965.wgt.RDat	ENSG00000213965.NUDT19	19	33182867	33204702	0.2395	rs1827700	2.81	rs1061686	0.211721	-9.11	0.262	93	6	enet	0.21	4.7e-21	-0.202	0.84
NA	./WEIGHTS//train_weights/Q8IVS2.ENSG00000100294.wgt.RDat	ENSG00000100294.MCAT	22	43528212	43539400	0.0667	rs138974	-2.63	rs12484656	0.012204	-3.73	0.232	141	18	enet	0.026	0.0011	0.20038	0.841
NA	./WEIGHTS//train_weights/P56962.ENSG00000136874.wgt.RDat	ENSG00000136874.STX17	9	102668915	102732618	0.0562	rs7850043	-1.653	rs4428721	0.047792	4.39	-0.184	85	85	blup	0.048	1e-05	-0.2006	0.841
NA	./WEIGHTS//train_weights/Q9UP65.ENSG00000105499.wgt.RDat	ENSG00000105499.PLA2G4C	19	48551100	48614074	0.1854	rs11564538	-2.62	rs12972957	0.073145	5.37	1.033	171	171	blup	0.094	2.1e-06	-0.1984	0.8427
NA	./WEIGHTS//train_weights/P10253.ENSG00000171298.wgt.RDat	ENSG00000171298.GAA	17	78075355	78093678	0.2255	rs2229221	-2.47	rs12952612	0.141	8.29	-0.377	98	4	lasso	0.23	7.8e-23	-0.19818	0.843
NA	./WEIGHTS//train_weights/Q9HC35.ENSG00000143924.wgt.RDat	ENSG00000143924.EML4	2	42396490	42559688	0.0864	rs6704819	-1.841	rs6736913	0.000383	-3.19	0.712	104	104	blup	0.025	0.0013	0.1986	0.843
NA	./WEIGHTS//train_weights/O43272.ENSG00000100033.wgt.RDat	ENSG00000100033.PRODH	22	18900294	18924066	0.369	rs1210635	-1.46	rs2238732	0.05544	-6.88	0.754	60	21	enet	0.24	7.1e-24	-0.19812	0.843
NA	./WEIGHTS//train_weights/Q9H936.ENSG00000177542.wgt.RDat	ENSG00000177542.SLC25A22	11	790475	798316	0.0971	rs3895063	-2.04	rs7946354	0.020345	-4.24	-1.283	100	100	bslmm	0.044	2.5e-05	0.19642	0.84428
NA	./WEIGHTS//train_weights/Q6ZV29.ENSG00000130653.wgt.RDat	ENSG00000130653.PNPLA7	9	140354404	140444986	0.1755	rs10867037	-2.247	rs2259657	0.03683	-5.25	0.551	59	3	lasso	0.078	3.9e-08	0.1948	0.84557
NA	./WEIGHTS//train_weights/Q9UKY3.ENSG00000228695.wgt.RDat	ENSG00000228695.CES1P1	16	55794460	55828070	0.1227	rs6499795	2.51	rs11076121	0.0817	5.18	0.155	131	131	bslmm	0.085	2.7e-07	-0.1938	0.846
NA	./WEIGHTS//train_weights/Q8WUK0.ENSG00000110536.wgt.RDat	ENSG00000110536.PTPMT1	11	47586982	47595013	0.0507	rs2280231	-1.24	rs4752839	0.009785	3.73	0.893	38	7	enet	0.029	0.00057	0.19397	0.8462
NA	./WEIGHTS//train_weights/Q96GW7.ENSG00000132692.wgt.RDat	ENSG00000132692.BCAN	1	156611182	156629324	0.105	rs11811735	1.97	rs3795736	0.052205	-5.75	0.257	108	108	bslmm	0.092	1.1e-09	-0.1924	0.847
NA	./WEIGHTS//train_weights/A6NKN8.ENSG00000248485.wgt.RDat	ENSG00000248485.PCP4L1	1	161228517	161255240	0.09	rs2307426	-2.81	rs2502807	0.003565	-3.9	1.229	121	23	enet	0.092	1.2e-09	-0.192	0.848
NA	./WEIGHTS//train_weights/Q9NWV4.ENSG00000162384.wgt.RDat	ENSG00000162384.C1orf123	1	53679771	53686289	0.0765	rs1288347	2.13	rs2297656	0.09236	-6.46	0.19	109	1	top1	0.092	1.1e-09	-0.19	0.849
NA	./WEIGHTS//train_weights/Q86SE8.ENSG00000158806.wgt.RDat	ENSG00000158806.NPM2	8	21881636	21894408	0.4516	rs6557781	-2.88	rs7818819	-0.002354	3.25	1.271	89	45	enet	0.095	1.7e-09	0.1891	0.849992
NA	./WEIGHTS//train_weights/Q8N183.ENSG00000164182.wgt.RDat	ENSG00000164182.NDUFAF2	5	60240956	60448853	0.1544	rs16878547	7.02	rs11951606	0.070707	5.47	0.331	107	12	enet	0.11	5.3e-11	0.1864	0.85213
NA	./WEIGHTS//train_weights/Q7KZF4.ENSG00000197157.wgt.RDat	ENSG00000197157.SND1	7	127292234	127732661	0.0302	rs6944446	-2.9	rs806180	0.008646	3.4	0.63	244	244	blup	0.018	0.0053	0.1859	0.853
NA	./WEIGHTS//train_weights/P42330.ENSG00000196139.wgt.RDat	ENSG00000196139.AKR1C3	10	5077546	5149878	0.0963	rs4559587	3.1	rs4143631	0.021847	4.11	1.449	139	139	blup	0.053	1.5e-05	0.18413	0.853908
NA	./WEIGHTS//train_weights/P32320.ENSG00000158825.wgt.RDat	ENSG00000158825.CDA	1	20915441	20945401	0.1198	rs669410	-2.46	rs1689924	0.075157	-5.26	0.184	175	1	top1	0.075	6.4e-07	-0.184	0.854
NA	./WEIGHTS//train_weights/Q96DB5.ENSG00000176623.wgt.RDat	ENSG00000176623.RMDN1	8	87480486	87526586	0.1469	rs16915620	1.72	rs6471309	0.187126	-8.83	0.302	85	85	bslmm	0.2	2.3e-20	-0.178	0.858749
NA	./WEIGHTS//train_weights/P04921.ENSG00000136732.wgt.RDat	ENSG00000136732.GYPC	2	127413509	127454246	0.0573	rs4662689	-2.126	rs10928980	0.001075	3.65	-0.427	111	111	blup	0.013	0.033	-0.1779	0.859
NA	./WEIGHTS//train_weights/Q9UNK9.ENSG00000013523.wgt.RDat	ENSG00000013523.ANGEL1	14	77253588	77292589	0.0664	rs768297	2.288	rs8017640	0.025962	-4.36	-0.196	114	114	blup	0.042	0.00018	0.1773	0.8593
NA	./WEIGHTS//train_weights/Q9Y2Y0.ENSG00000102931.wgt.RDat	ENSG00000102931.ARL2BP	16	57279010	57287516	0.1908	rs17373793	-2.1	rs7198865	0.088	-5.88	0.177	76	1	top1	0.088	2.7e-09	-0.177	0.86
NA	./WEIGHTS//train_weights/P30039.ENSG00000108187.wgt.RDat	ENSG00000108187.PBLD	10	70042417	70092806	0.1563	rs4525104	-1.9	rs731063	0.20664	9.63	0.089	118	5	lasso	0.22	1.1e-22	0.17512	0.860988
NA	./WEIGHTS//train_weights/Q5T6X4.ENSG00000183807.wgt.RDat	ENSG00000183807.FAM162B	6	117073363	117086886	0.1413	rs1567700	2.2	rs654128	0.117477	-6.49	-0.22	51	11	enet	0.13	1.5e-12	0.1746	0.861
NA	./WEIGHTS//train_weights/Q9NZR2.ENSG00000168702.wgt.RDat	ENSG00000168702.LRP1B	2	140988992	142889270	0.1403	rs10928758	-2.878	rs11680286	-0.001251	3.58	-0.793	1109	1109	blup	0.059	1.3e-06	-0.1743	0.862
NA	./WEIGHTS//train_weights/Q5T4D3.ENSG00000125247.wgt.RDat	ENSG00000125247.TMTC4	13	101256181	101327347	0.1321	rs1572641	-3.42	rs9518128	0.002485	-3.68	0.064	124	124	bslmm	0.043	0.00041	0.173	0.8625
NA	./WEIGHTS//train_weights/Q9H8M5.ENSG00000148842.wgt.RDat	ENSG00000148842.CNNM2	10	104678050	104849978	0.1245	rs3781283	2.88	rs11191454	0.075297	5.69	-0.373	132	4	lasso	0.085	6.8e-09	-0.17238	0.863141
NA	./WEIGHTS//train_weights/P46926.ENSG00000113552.wgt.RDat	ENSG00000113552.GNPDA1	5	141371314	141392606	0.1329	rs252106	-2.5	rs164080	0.040047	-4.46	0.74	122	122	blup	0.074	4.8e-08	-0.1717	0.86369
NA	./WEIGHTS//train_weights/Q7Z6K5.ENSG00000242498.wgt.RDat	ENSG00000242498.C15orf38	15	90443159	90456188	0.0707	rs1256826	2.36	rs10520684	0.06076	-4.92	-0.171	63	1	top1	0.061	7.8e-07	0.171	0.86422
NA	./WEIGHTS//train_weights/Q96C11.ENSG00000172456.wgt.RDat	ENSG00000172456.FGGY	1	59762310	60233347	0.0702	rs17555959	-2.81	rs835401	0.006682	3.32	-1.388	225	225	blup	0.032	0.0014	-0.1697	0.865
NA	./WEIGHTS//train_weights/P04424.ENSG00000126522.wgt.RDat	ENSG00000126522.ASL	7	65540785	65558545	0.1431	rs365896	-1.97	rs313830	0.151113	-8.45	0.053	53	6	lasso	0.19	7.3e-19	0.1705	0.865
NA	./WEIGHTS//train_weights/Q86YD3.ENSG00000149582.wgt.RDat	ENSG00000149582.TMEM25	11	118401756	118417995	0.0829	rs9332869	-2.56	rs7941217	0.046685	-4.26	-0.169	67	1	top1	0.047	2.3e-05	0.169	0.8658
NA	./WEIGHTS//train_weights/O43493.ENSG00000152291.wgt.RDat	ENSG00000152291.TGOLN2	2	85545147	85555548	0.0536	rs6753357	-2.493	rs4247303	0.09149	-6.21	-0.169	112	1	top1	0.091	1.3e-09	0.169	0.866
NA	./WEIGHTS//train_weights/Q9UKW4.ENSG00000134215.wgt.RDat	ENSG00000134215.VAV3	1	108113782	108507766	0.1107	rs12748320	-3.64	rs1777467	0.013258	3.93	1.806	343	343	blup	0.028	0.0067	0.1676	0.867
NA	./WEIGHTS//train_weights/O94779.ENSG00000149972.wgt.RDat	ENSG00000149972.CNTN5	11	98891683	100229616	0.2087	rs7106196	3.05	rs17660476	0.082766	-5.79	-0.12	870	870	bslmm	0.1	1.3e-10	-0.16734	0.8671
NA	./WEIGHTS//train_weights/P23786.ENSG00000157184.wgt.RDat	ENSG00000157184.CPT2	1	53662101	53679869	0.2771	rs1288347	2.13	rs11578832	0.298354	-10.66	0.072	127	4	lasso	0.3	2.1e-31	-0.1657	0.868
NA	./WEIGHTS//train_weights/Q2VPK5.ENSG00000174177.wgt.RDat	ENSG00000174177.CTU2	16	88772871	88781794	0.0886	rs565211	2.48	rs4782394	-0.00308	-3.2	-0.737	126	126	bslmm	0.025	0.0038	-0.16439	0.869
NA	./WEIGHTS//train_weights/P20337.ENSG00000169213.wgt.RDat	ENSG00000169213.RAB3B	1	52373628	52456436	0.0446	rs10888744	-1.74	rs2244156	0.006522	3.51	0.19	67	7	enet	0.028	0.00069	-0.1636	0.87
NA	./WEIGHTS//train_weights/A6NGB9.ENSG00000122574.wgt.RDat	ENSG00000122574.WIPF3	7	29846102	29956682	0.0758	rs174931	2.3	rs174917	0.047611	-5.37	0.214	135	2	lasso	0.054	3.2e-06	-0.1626	0.871
NA	./WEIGHTS//train_weights/Q14315.ENSG00000128591.wgt.RDat	ENSG00000128591.FLNC	7	128470431	128499328	0.0407	rs7799186	-2.37	rs9656375	0.000165	3.61	0.68	96	96	blup	0.023	0.0017	-0.1628	0.871
NA	./WEIGHTS//train_weights/P83111.ENSG00000103642.wgt.RDat	ENSG00000103642.LACTB	15	63413999	63434260	0.154	rs11636105	-2.32	rs2729835	0.21167	-9.06	0.427	93	12	enet	0.21	2.4e-21	-0.16209	0.87123
NA	./WEIGHTS//train_weights/O75881.ENSG00000172817.wgt.RDat	ENSG00000172817.CYP7B1	8	65500320	65711318	0.0333	rs9650210	1.97	rs6472155	0.013336	-3.95	-1.202	143	143	blup	0.04	0.00017	0.1584	0.874161
NA	./WEIGHTS//train_weights/Q9Y6N1.ENSG00000166260.wgt.RDat	ENSG00000166260.COX11	17	53029263	53046146	0.0706	rs8065212	2.06	rs11871939	0.0678	-5.31	-0.157	106	1	top1	0.068	2.7e-06	0.157	0.875
NA	./WEIGHTS//train_weights/Q9H1J1.ENSG00000169062.wgt.RDat	ENSG00000169062.UPF3A	13	115047059	115071283	0.116	rs11840483	-2.33	rs9525204	0.102007	-6.01	-0.154	59	1	top1	0.1	4.3e-08	0.154	0.8776
NA	./WEIGHTS//train_weights/P53667.ENSG00000106683.wgt.RDat	ENSG00000106683.LIMK1	7	73497263	73536855	0.0938	rs2301995	1.64	rs2285025	0.046244	5.35	-0.276	87	87	blup	0.052	5.2e-06	-0.1522	0.879
NA	./WEIGHTS//train_weights/P12814.ENSG00000072110.wgt.RDat	ENSG00000072110.ACTN1	14	69340860	69446157	0.0304	rs12590951	2.32	rs735986	0.001397	3.35	0.562	138	138	bslmm	0.0098	0.03	-0.1517	0.8794
NA	./WEIGHTS//train_weights/Q8IW45.ENSG00000213995.wgt.RDat	ENSG00000213995.CARKD	13	111267881	111292340	0.2862	rs9559849	2.55	rs179356	0.257227	10	-0.011	140	7	lasso	0.26	3.3e-26	0.151	0.88
NA	./WEIGHTS//train_weights/Q9Y375.ENSG00000137806.wgt.RDat	ENSG00000137806.NDUFAF1	15	41679551	41694717	0.1664	rs12440045	2.42	rs17730589	0.17309	-8.41	0.118	66	15	enet	0.19	2.2e-19	-0.15056	0.88032
NA	./WEIGHTS//train_weights/Q6ZUX7.ENSG00000145685.wgt.RDat	ENSG00000145685.LHFPL2	5	77781038	78065844	0.0643	rs341926	-2.75	rs4143069	0.020577	-3.3	-0.149	170	1	top1	0.021	0.01	0.149	0.88155
NA	./WEIGHTS//train_weights/P55211.ENSG00000132906.wgt.RDat	ENSG00000132906.CASP9	1	15817327	15853029	0.07	rs6675825	-2.29	rs4646049	0.025387	-3.93	1.168	89	89	bslmm	0.052	0.0003	-0.1488	0.882
NA	./WEIGHTS//train_weights/Q9Y2D4.ENSG00000144036.wgt.RDat	ENSG00000144036.EXOC6B	2	72403113	73053170	0.0417	rs7557210	3.263	rs4852893	0.006909	3.48	-1.504	212	10	enet	0.032	0.0003	0.1488	0.882
NA	./WEIGHTS//train_weights/Q9NZU5.ENSG00000071282.wgt.RDat	ENSG00000071282.LMCD1	3	8543393	8609805	0.0777	rs17049172	2.63	rs7635073	0.004466	-4.48	0.662	202	6	lasso	0.012	0.022	-0.148	0.88231
NA	./WEIGHTS//train_weights/Q8WUH2.ENSG00000135966.wgt.RDat	ENSG00000135966.TGFBRAP1	2	105880871	105946491	0.0625	rs10169988	-2.156	rs873738	0.014423	3.84	-0.147	157	1	top1	0.014	0.011	-0.147	0.883
NA	./WEIGHTS//train_weights/P57737.ENSG00000262246.wgt.RDat	ENSG00000262246.CORO7	16	4404543	4475706	0.0833	rs6500594	-2.19	rs6500596	0.0614	-5	-0.146	83	1	top1	0.061	6.8e-07	0.146	0.884
NA	./WEIGHTS//train_weights/P51452.ENSG00000108861.wgt.RDat	ENSG00000108861.DUSP3	17	41843489	41856356	0.0873	rs2537	2.11	rs41519245	0.00427	-3.54	0.36	80	80	bslmm	0.036	0.00012	0.14456	0.885
NA	./WEIGHTS//train_weights/P58340.ENSG00000178053.wgt.RDat	ENSG00000178053.MLF1	3	158288952	158325041	0.0638	rs6441205	1.38	rs7631310	0.024501	-4.97	-0.045	85	14	enet	0.038	0.00039	-0.1441	0.88541
NA	./WEIGHTS//train_weights/O43708.ENSG00000100577.wgt.RDat	ENSG00000100577.GSTZ1	14	77787227	77797940	0.2831	rs8012228	3.196	rs2287395	0.432308	12.53	0.256	128	8	lasso	0.44	4.6e-47	-0.1422	0.8869
NA	./WEIGHTS//train_weights/O15040.ENSG00000196663.wgt.RDat	ENSG00000196663.TECPR2	14	102829300	102968818	0.0367	rs9743505	-2.242	rs1190554	0.046963	4.43	0.137	108	1	top1	0.047	1.3e-05	0.137	0.891
NA	./WEIGHTS//train_weights/Q96T66.ENSG00000163864.wgt.RDat	ENSG00000163864.NMNAT3	3	139279022	139396859	0.2819	rs9822458	-1.84	rs16849220	0.077089	6.85	0.195	163	26	enet	0.24	8e-25	-0.1353	0.89239
NA	./WEIGHTS//train_weights/Q9NZC3.ENSG00000006007.wgt.RDat	ENSG00000006007.GDE1	16	19513015	19533467	0.0354	rs3743957	-1.58	rs2187659	0.0353	-4.3	0.134	117	1	top1	0.035	0.00015	-0.134	0.893
NA	./WEIGHTS//train_weights/Q99417.ENSG00000214114.wgt.RDat	ENSG00000214114.MYCBP	1	39328636	39347289	0.0436	rs11810357	1.65	rs9438970	0.04516	4.18	-0.132	89	1	top1	0.045	6.8e-05	-0.132	0.895
NA	./WEIGHTS//train_weights/Q96EK7.ENSG00000112584.wgt.RDat	ENSG00000112584.FAM120B	6	170599791	170716153	0.0955	rs2103900	2.05	rs9366199	0.086308	-5.96	-0.132	155	1	top1	0.086	7.7e-09	0.1323	0.895
NA	./WEIGHTS//train_weights/Q15111.ENSG00000115896.wgt.RDat	ENSG00000115896.PLCL1	2	198669426	199437305	0.0682	rs16824376	2.085	rs1595823	0.068858	5.79	0.34	180	10	lasso	0.079	1.7e-08	-0.131	0.896
NA	./WEIGHTS//train_weights/Q5R3I4.ENSG00000075234.wgt.RDat	ENSG00000075234.TTC38	22	46663858	46689905	0.2813	rs881740	-2.58	rs6008495	0.162458	7.72	-0.123	86	8	lasso	0.27	5.9e-27	0.13077	0.896
NA	./WEIGHTS//train_weights/Q15257.ENSG00000119383.wgt.RDat	ENSG00000119383.PPP2R4	9	131873229	131911225	0.2658	rs422134	1.592	rs3118634	0.126841	-7.17	0.548	88	88	bslmm	0.16	1.2e-15	-0.1305	0.89617
NA	./WEIGHTS//train_weights/P35914.ENSG00000117305.wgt.RDat	ENSG00000117305.HMGCL	1	24128375	24165110	0.062	rs2235541	1.88	rs11591202	0.076421	5.94	0.129	55	1	top1	0.076	3e-08	0.129	0.897
NA	./WEIGHTS//train_weights/O94772.ENSG00000176956.wgt.RDat	ENSG00000176956.LY6H	8	144239331	144242128	0.0709	rs12680172	-2.21	rs10109061	0.048429	-5.4	0.173	78	78	blup	0.051	5.8e-06	-0.1275	0.89857
NA	./WEIGHTS//train_weights/P0C0L5.ENSG00000224389.wgt.RDat	ENSG00000224389.C4B	6	31982539	32003195	0.2277	rs2072632	-2.01	rs12614	0.035692	5.05	1.414	78	78	bslmm	0.093	2.8e-09	0.1264	0.899
NA	./WEIGHTS//train_weights/Q8N118.ENSG00000186377.wgt.RDat	ENSG00000186377.CYP4X1	1	47427036	47516423	0.0253	rs17102950	2.62	rs9793716	0.030993	-4.3	-0.126	72	1	top1	0.031	0.00035	0.126	0.9
NA	./WEIGHTS//train_weights/P28676.ENSG00000115271.wgt.RDat	ENSG00000115271.GCA	2	163175350	163228105	0.1815	rs13023380	1.814	rs17783344	0.051795	-4.34	0.126	40	1	top1	0.052	1.6e-05	-0.126	0.9
NA	./WEIGHTS//train_weights/Q6ICL3.ENSG00000183597.wgt.RDat	ENSG00000183597.TANGO2	22	20004537	20053449	0.1104	rs3757	-2.78	rs2008591	0.062662	5.48	-0.633	175	175	blup	0.07	1.2e-07	0.12624	0.9
NA	./WEIGHTS//train_weights/Q9Y6N5.ENSG00000137767.wgt.RDat	ENSG00000137767.SQRDL	15	45923346	45983492	0.1326	rs16946821	2.65	rs1044032	0.11794	-6.79	-0.134	109	3	lasso	0.12	3.7e-12	0.12554	0.90009
NA	./WEIGHTS//train_weights/Q5BKU9.ENSG00000204237.wgt.RDat	ENSG00000204237.OXLD1	17	79632066	79633665	0.1115	rs12451124	1.51	rs35646762	0.0118	-3.69	1.01	71	29	enet	0.025	0.0012	-0.12426	0.901
NA	./WEIGHTS//train_weights/Q96F10.ENSG00000141504.wgt.RDat	ENSG00000141504.SAT2	17	7529552	7531194	0.3143	rs6608	2.75	rs9913778	0.219	-9.32	0.145	102	102	blup	0.29	1.1e-29	-0.12366	0.902
NA	./WEIGHTS//train_weights/Q4VC31.ENSG00000160124.wgt.RDat	ENSG00000160124.CCDC58	3	122078438	122102078	0.1023	rs17201246	3.66	rs6438726	0.065027	-5.28	-0.123	116	1	top1	0.065	3.2e-07	0.123	0.90211
NA	./WEIGHTS//train_weights/O14653.ENSG00000108433.wgt.RDat	ENSG00000108433.GOSR2	17	45000483	45105003	0.0632	rs197938	1.97	rs17676978	0.01	-4.85	-1.222	86	86	blup	0.052	5e-06	0.12195	0.903
NA	./WEIGHTS//train_weights/O95398.ENSG00000079337.wgt.RDat	ENSG00000079337.RAPGEF3	12	48128455	48164823	0.0752	rs1233046	1.98	rs2239188	0.006474	-4.3	-0.203	118	118	bslmm	0.027	0.0012	-0.1199	0.905
NA	./WEIGHTS//train_weights/Q8IUR0.ENSG00000181029.wgt.RDat	ENSG00000181029.TRAPPC5	19	7745729	7747744	0.0447	rs11672993	3.46	rs11668398	0.002026	-3.44	0.751	103	103	bslmm	0.0053	0.085	-0.1184	0.9057
NA	./WEIGHTS//train_weights/Q969T9.ENSG00000132471.wgt.RDat	ENSG00000132471.WBP2	17	73841780	73852588	0.0364	rs820386	1.86	rs7370	0.0235	-4.77	-0.342	59	6	enet	0.037	9.5e-05	0.1181	0.906
NA	./WEIGHTS//train_weights/Q04760.ENSG00000124767.wgt.RDat	ENSG00000124767.GLO1	6	38643701	38670917	0.06	rs12208880	2.4	rs1781735	0.045841	-4.85	-0.118	106	1	top1	0.046	1.7e-05	0.118	0.906
NA	./WEIGHTS//train_weights/Q9BW62.ENSG00000102781.wgt.RDat	ENSG00000102781.KATNAL1	13	30776767	30881621	0.0592	rs9508691	-2.19	rs4769819	0.005227	3.37	-0.716	149	149	bslmm	0.034	0.00021	-0.118	0.9063
NA	./WEIGHTS//train_weights/Q9GZY8.ENSG00000168958.wgt.RDat	ENSG00000168958.MFF	2	228189867	228222550	0.077	rs6708202	2.371	rs7560053	0.042715	5.36	0.205	108	4	lasso	0.047	1.2e-05	0.1168	0.907
NA	./WEIGHTS//train_weights/Q9Y3C6.ENSG00000137168.wgt.RDat	ENSG00000137168.PPIL1	6	36822603	36842800	0.3363	rs17374068	-1.86	rs236350	0.125945	-7.25	0.222	153	153	blup	0.15	1.4e-15	-0.1162	0.907
NA	./WEIGHTS//train_weights/Q5SXM8.ENSG00000213221.wgt.RDat	ENSG00000213221.DNLZ	9	139253932	139258241	0.0879	rs4400499	3.33	rs11145958	0.018826	-3.54	-1.856	73	73	bslmm	0.034	0.00098	0.1156	0.90798
NA	./WEIGHTS//train_weights/Q9Y5P6.ENSG00000173540.wgt.RDat	ENSG00000173540.GMPPB	3	49754277	49761384	0.1648	rs34462841	1.26	rs6809879	0.177227	8.21	-0.093	79	6	lasso	0.18	2.6e-18	-0.1129	0.91013
NA	./WEIGHTS//train_weights/O00534.ENSG00000110002.wgt.RDat	ENSG00000110002.VWA5A	11	123986069	124018428	0.2181	rs6590039	-1.86	rs2466583	0.071791	-5.99	-0.514	135	135	bslmm	0.14	4.4e-14	-0.11216	0.9107
NA	./WEIGHTS//train_weights/P42898.ENSG00000177000.wgt.RDat	ENSG00000177000.MTHFR	1	11845780	11866977	0.4637	rs198358	-2.42	rs1801133	0.168296	-8.18	0.389	144	144	bslmm	0.25	8.2e-26	0.112	0.911
NA	./WEIGHTS//train_weights/Q08257.ENSG00000116791.wgt.RDat	ENSG00000116791.CRYZ	1	75171170	75199092	0.5587	rs10493546	-3.02	rs17552114	0.084348	-7.61	1.139	104	36	enet	0.47	1.9e-54	0.1121	0.911
NA	./WEIGHTS//train_weights/Q16854.ENSG00000114956.wgt.RDat	ENSG00000114956.DGUOK	2	74153953	74186088	0.2739	rs6745776	-2.851	rs1653259	0.000203	-3.76	-1.089	126	34	enet	0.11	2.5e-11	-0.112	0.911
NA	./WEIGHTS//train_weights/Q14249.ENSG00000167136.wgt.RDat	ENSG00000167136.ENDOG	9	131580753	131584956	0.0461	rs3750318	-1.224	rs2997922	0.075245	-5.17	-0.191	58	9	enet	0.078	1.1e-07	0.1115	0.91122
NA	./WEIGHTS//train_weights/Q9BVJ7.ENSG00000158716.wgt.RDat	ENSG00000158716.DUSP23	1	159750722	159752333	0.4665	rs2494493	-2.28	rs1129923	0.417299	-12.58	-0.11	104	1	top1	0.42	5.3e-46	0.11	0.912
NA	./WEIGHTS//train_weights/Q6VY07.ENSG00000175115.wgt.RDat	ENSG00000175115.PACS1	11	65837834	66012218	0.0378	rs11537993	2.67	rs9326370	0.020407	4	0.024	131	19	enet	0.027	0.0008	-0.11041	0.91209
NA	./WEIGHTS//train_weights/Q6P6B1.ENSG00000177459.wgt.RDat	ENSG00000177459.C8orf47	8	99076539	99105838	0.078	rs16896768	2.99	rs10098159	0.007661	3.62	0.148	141	141	bslmm	0.036	0.00048	0.1097	0.912646
NA	./WEIGHTS//train_weights/Q9Y4K4.ENSG00000012983.wgt.RDat	ENSG00000012983.MAP4K5	14	50885219	51027844	0.0669	rs7147228	-1.425	rs12050306	0.001844	-3.63	0.926	115	115	blup	0.02	0.0066	-0.1092	0.913
NA	./WEIGHTS//train_weights/Q8WXG6.ENSG00000110514.wgt.RDat	ENSG00000110514.MADD	11	47290712	47351582	0.4422	rs11606287	-2.82	rs11570115	0.211507	-9.09	0.375	99	99	bslmm	0.24	5.7e-24	0.10769	0.91424
NA	./WEIGHTS//train_weights/O60610.ENSG00000131504.wgt.RDat	ENSG00000131504.DIAPH1	5	140894583	140998622	0.067	rs3749760	-2.64	rs6892185	0.036253	5.05	-0.535	151	11	enet	0.05	6.5e-06	0.1066	0.91514
NA	./WEIGHTS//train_weights/Q5SQN1.ENSG00000143740.wgt.RDat	ENSG00000143740.SNAP47	1	227916240	227968927	0.079	rs1923821	3.77	rs6703846	0.026087	4.65	-2.117	92	92	blup	0.049	9e-06	-0.1043	0.917
NA	./WEIGHTS//train_weights/O75380.ENSG00000145494.wgt.RDat	ENSG00000145494.NDUFS6	5	1801514	1816719	0.0474	rs260393	2.19	rs11955771	0.006608	-3.18	-1.129	140	140	bslmm	0.0072	0.055	0.1027	0.91822
NA	./WEIGHTS//train_weights/Q504Y0.ENSG00000148482.wgt.RDat	ENSG00000148482.SLC39A12	10	18240768	18332221	0.0916	rs2497772	-2.81	rs10508554	0.038627	-4.68	-0.089	141	141	bslmm	0.046	1.9e-05	-0.10224	0.918567
NA	./WEIGHTS//train_weights/P36405.ENSG00000138175.wgt.RDat	ENSG00000138175.ARL3	10	104433488	104474164	0.1608	rs2489744	3	rs2298278	0.012354	-4.39	-1.04	100	100	bslmm	0.043	2.9e-05	0.10185	0.918878
NA	./WEIGHTS//train_weights/Q96JX3.ENSG00000122335.wgt.RDat	ENSG00000122335.SERAC1	6	158530536	158589312	0.071	rs9459503	-1.58	rs13340445	-0.001284	3.24	0.666	140	140	bslmm	0.017	0.0072	0.1014	0.919
NA	./WEIGHTS//train_weights/P16152.ENSG00000159228.wgt.RDat	ENSG00000159228.CBR1	21	37442239	37445464	0.2142	rs2835249	1.85	rs1005696	0.099302	6.33	-0.274	115	4	lasso	0.12	3.5e-12	0.101	0.9194
NA	./WEIGHTS//train_weights/Q6NVY1.ENSG00000198130.wgt.RDat	ENSG00000198130.HIBCH	2	191054461	191208919	0.3706	rs13382543	2.418	rs16832572	0.340979	-11.8	-0.699	120	12	enet	0.42	9.2e-46	-0.0999	0.92
NA	./WEIGHTS//train_weights/Q4AE62.ENSG00000121964.wgt.RDat	ENSG00000121964.GTDC1	2	144695635	145090135	0.0835	rs16823339	1.903	rs7589628	0.026178	-4.14	-0.415	98	98	bslmm	0.035	0.00016	0.0975	0.922
NA	./WEIGHTS//train_weights/P29401.ENSG00000163931.wgt.RDat	ENSG00000163931.TKT	3	53258723	53290068	0.1114	rs6807359	3.52	rs3736151	0.092407	6.22	0.791	93	21	enet	0.1	1.2e-10	0.0977	0.9222
NA	./WEIGHTS//train_weights/Q9HB19.ENSG00000169499.wgt.RDat	ENSG00000169499.PLEKHA2	8	38758753	38831428	0.2292	rs3847141	-1.63	rs7008738	0.13222	7.51	-0.073	94	10	lasso	0.22	1e-21	0.0967	0.922952
NA	./WEIGHTS//train_weights/O43353.ENSG00000104312.wgt.RDat	ENSG00000104312.RIPK2	8	90769975	90803291	0.0798	rs11782542	1.65	rs428484	0.066712	5.52	0.095	87	1	top1	0.067	4e-07	0.095	0.924315
NA	./WEIGHTS//train_weights/P42226.ENSG00000166888.wgt.RDat	ENSG00000166888.STAT6	12	57489191	57525922	0.1076	rs1799986	-2.09	rs4759275	0.04722	5.16	1.25	78	78	blup	0.064	4.3e-07	0.0942	0.925
NA	./WEIGHTS//train_weights/Q16822.ENSG00000100889.wgt.RDat	ENSG00000100889.PCK2	14	24563262	24579807	0.0486	rs10147475	-2.792	rs4982856	0.000649	3.87	-1.031	68	68	blup	0.014	0.013	-0.0895	0.9287
NA	./WEIGHTS//train_weights/Q15118.ENSG00000152256.wgt.RDat	ENSG00000152256.PDK1	2	173420101	173489823	0.0517	rs12151618	2.975	rs7566884	0.053625	-5.03	-0.089	116	1	top1	0.054	3.4e-06	0.089	0.929
NA	./WEIGHTS//train_weights/Q6UWP7.ENSG00000172954.wgt.RDat	ENSG00000172954.LCLAT1	2	30670092	30867091	0.1273	rs17009486	2.074	rs1060737	0.103301	7.04	-0.032	217	17	enet	0.13	8e-13	-0.087	0.931
NA	./WEIGHTS//train_weights/Q9H0R1.ENSG00000053770.wgt.RDat	ENSG00000053770.AP5M1	14	57735627	57756797	0.1758	rs11849276	-3.865	rs7143894	0.083153	-5.54	0.328	58	58	bslmm	0.088	9e-08	-0.0858	0.9316
NA	./WEIGHTS//train_weights/P07339.ENSG00000117984.wgt.RDat	ENSG00000117984.CTSD	11	1773982	1785222	0.1024	rs689363	-2.53	rs12146638	0.007706	4.14	-0.305	88	3	lasso	0.045	1.8e-05	0.08552	0.93185
NA	./WEIGHTS//train_weights/P48163.ENSG00000065833.wgt.RDat	ENSG00000065833.ME1	6	83920108	84140797	0.5845	rs1171114	-2.49	rs6901074	0.060646	5.45	-0.622	134	134	bslmm	0.27	1.7e-27	0.0855	0.932
NA	./WEIGHTS//train_weights/P52758.ENSG00000132541.wgt.RDat	ENSG00000132541.HRSP12	8	99114572	99129469	0.1207	rs16896768	2.99	rs2514334	0.123199	-7	-0.067	121	3	lasso	0.13	5.7e-13	0.083	0.933837
NA	./WEIGHTS//train_weights/P56199.ENSG00000213949.wgt.RDat	ENSG00000213949.ITGA1	5	52083730	52255040	0.0736	rs2456205	2.75	rs17209947	-0.0021	-3.41	-0.139	188	188	blup	0.027	0.00087	0.0829	0.93392
NA	./WEIGHTS//train_weights/Q6UWP2.ENSG00000108272.wgt.RDat	ENSG00000108272.DHRS11	17	34948228	34957235	0.1559	rs12453272	2.37	rs35712149	0.28	-10.45	-0.082	101	1	top1	0.28	1e-28	0.082	0.935
NA	./WEIGHTS//train_weights/Q96CW6.ENSG00000103061.wgt.RDat	ENSG00000103061.SLC7A6OS	16	68318406	68344849	0.0787	rs12599487	1.24	rs4783552	0.0258	-4.05	-0.08	84	1	top1	0.026	0.0034	0.08	0.936
NA	./WEIGHTS//train_weights/P31327.ENSG00000021826.wgt.RDat	ENSG00000021826.CPS1	2	211342406	211543831	0.0379	rs2371079	1.556	rs10932339	0.024479	4.14	-0.116	133	133	bslmm	0.025	0.0012	-0.0805	0.936
NA	./WEIGHTS//train_weights/Q9NSY2.ENSG00000172345.wgt.RDat	ENSG00000172345.STARD5	15	81601394	81616524	0.1597	rs7164765	2.81	rs4778893	0.10337	-7.05	-0.945	96	96	blup	0.17	1.7e-15	-0.07773	0.93804
NA	./WEIGHTS//train_weights/Q13564.ENSG00000159593.wgt.RDat	ENSG00000159593.NAE1	16	66836778	66907159	0.0458	rs17700154	-1.06	rs3026082	0.00741	3.92	0.496	77	77	blup	0.026	0.0009	0.07715	0.939
NA	./WEIGHTS//train_weights/Q8NBM8.ENSG00000145882.wgt.RDat	ENSG00000145882.PCYOX1L	5	148737570	148749216	0.1018	rs353287	2.76	rs353255	0.025411	-4.54	0.337	124	22	enet	0.056	2e-06	0.0761	0.93935
NA	./WEIGHTS//train_weights/A1A5C7.ENSG00000137266.wgt.RDat	ENSG00000137266.SLC22A23	6	3269196	3457256	0.075	rs6596979	2.76	rs9503598	0.034017	-4.52	0.075	226	1	top1	0.034	0.00019	-0.075	0.94
NA	./WEIGHTS//train_weights/Q9H008.ENSG00000107902.wgt.RDat	ENSG00000107902.LHPP	10	126150403	126306457	0.1475	rs11819582	2.55	rs2001514	0.048799	5.32	0.505	219	219	blup	0.076	3.6e-08	-0.07396	0.941042
NA	./WEIGHTS//train_weights/Q96HE7.ENSG00000197930.wgt.RDat	ENSG00000197930.ERO1L	14	53106634	53162618	0.0284	rs4901291	2.664	rs12892461	0.024353	3.78	0.073	77	1	top1	0.024	0.0014	0.073	0.9418
NA	./WEIGHTS//train_weights/Q9P2B2.ENSG00000134247.wgt.RDat	ENSG00000134247.PTGFRN	1	117452679	117532980	0.0478	rs12059918	2.11	rs2254224	0.000332	-3.26	0.883	148	148	bslmm	0.029	0.00058	-0.0725	0.942
NA	./WEIGHTS//train_weights/Q8NBS9.ENSG00000239264.wgt.RDat	ENSG00000239264.TXNDC5	6	7881483	8026646	0.0554	rs17399818	-2.52	rs9505293	0.052306	4.7	-0.071	165	1	top1	0.052	4.4e-06	-0.071	0.943
NA	./WEIGHTS//train_weights/P30837.ENSG00000137124.wgt.RDat	ENSG00000137124.ALDH1B1	9	38392661	38398658	0.6029	rs7867383	-2.727	rs2228093	0.235833	-9.51	-0.189	138	138	bslmm	0.37	5.7e-40	0.0707	0.9436
NA	./WEIGHTS//train_weights/Q9NQR4.ENSG00000114021.wgt.RDat	ENSG00000114021.NIT2	3	100053545	100075710	0.5744	rs2316701	-3.03	rs2289506	0.55219	-14.3	0.07	68	1	top1	0.55	3.2e-66	-0.07	0.94419
NA	./WEIGHTS//train_weights/Q5VUB5.ENSG00000148468.wgt.RDat	ENSG00000148468.FAM171A1	10	15253642	15413061	0.251	rs11259499	-1.89	rs3814165	0.189344	-8.6	0.138	198	198	bslmm	0.21	3.9e-21	0.06978	0.944372
NA	./WEIGHTS//train_weights/O75223.ENSG00000006625.wgt.RDat	ENSG00000006625.GGCT	7	30536237	30591095	0.1557	rs38403	2.55	rs38416	0.226959	9.39	0.069	80	1	top1	0.23	6.4e-23	0.069	0.945
NA	./WEIGHTS//train_weights/Q13393.ENSG00000075651.wgt.RDat	ENSG00000075651.PLD1	3	171318195	171528740	0.0478	rs1076506	-3.03	rs3843979	0.032706	4.05	-0.068	191	1	top1	0.033	0.00071	-0.068	0.94579
NA	./WEIGHTS//train_weights/Q9BQ67.ENSG00000105447.wgt.RDat	ENSG00000105447.GRWD1	19	48949030	48960279	0.1796	rs12611321	-1.86	rs1643487	0.033322	-5.42	0.005	62	6	lasso	0.14	1e-13	-0.0664	0.947
NA	./WEIGHTS//train_weights/O14548.ENSG00000115944.wgt.RDat	ENSG00000115944.COX7A2L	2	42560686	42652228	0.0445	rs17029452	-1.24	rs6544546	0.019671	4.03	-0.232	88	5	enet	0.03	0.00048	0.0663	0.947
NA	./WEIGHTS//train_weights/P07311.ENSG00000119640.wgt.RDat	ENSG00000119640.ACYP1	14	75519924	75536186	0.0696	rs28756981	2.543	rs7156328	0.109057	6.55	0.066	69	1	top1	0.11	3.1e-11	0.066	0.9474
NA	./WEIGHTS//train_weights/Q96CN7.ENSG00000066583.wgt.RDat	ENSG00000066583.ISOC1	5	128430444	128449721	0.0428	rs10054567	1.94	rs7735174	0.013463	3.53	0.441	89	89	bslmm	0.026	0.00097	0.0655	0.94774
NA	./WEIGHTS//train_weights/Q05193.ENSG00000106976.wgt.RDat	ENSG00000106976.DNM1	9	130965658	131017527	0.0381	rs9644952	-2.127	rs2302425	0.010279	3.58	0.232	81	81	blup	0.014	0.012	-0.065	0.94815
NA	./WEIGHTS//train_weights/P49768.ENSG00000080815.wgt.RDat	ENSG00000080815.PSEN1	14	73603126	73690399	0.0654	rs17182286	3.298	rs17781801	0.059388	-5.09	-0.064	87	1	top1	0.059	1e-06	0.064	0.949
NA	./WEIGHTS//train_weights/Q9NRQ2.ENSG00000114698.wgt.RDat	ENSG00000114698.PLSCR4	3	145910126	145968966	0.2015	rs41358845	-2.22	rs3762687	0.227304	9.39	0.062	98	1	top1	0.23	5.9e-23	0.062	0.95056
NA	./WEIGHTS//train_weights/Q96CU9.ENSG00000110074.wgt.RDat	ENSG00000110074.FOXRED1	11	126138950	126148026	0.036	rs522486	2.6	rs8177348	0.0466	-4.68	0.058	139	1	top1	0.047	1.4e-05	-0.058	0.95375
NA	./WEIGHTS//train_weights/P41217.ENSG00000091972.wgt.RDat	ENSG00000091972.CD200	3	112051194	112081659	0.2458	rs1032239	2	rs2399416	0.360547	-11.67	-0.036	122	5	lasso	0.36	5.1e-38	0.0579	0.95387
NA	./WEIGHTS//train_weights/P23434.ENSG00000140905.wgt.RDat	ENSG00000140905.GCSH	16	81115566	81130008	0.0388	rs7185427	-2.59	rs12927239	0.0228	-4.26	-0.6	174	174	blup	0.027	0.00079	-0.05622	0.955
NA	./WEIGHTS//train_weights/P42331.ENSG00000163219.wgt.RDat	ENSG00000163219.ARHGAP25	2	68906733	69053965	0.3868	rs7591722	-2.161	rs2280244	0.273245	-9.96	-0.16	231	7	lasso	0.34	1.8e-34	-0.0561	0.955
NA	./WEIGHTS//train_weights/Q01970.ENSG00000149782.wgt.RDat	ENSG00000149782.PLCB3	11	64018995	64036622	0.033	rs4672	-1.64	rs11603192	0.000618	3.43	-0.152	81	6	enet	0.012	0.019	-0.05637	0.95505
NA	./WEIGHTS//train_weights/P49447.ENSG00000008283.wgt.RDat	ENSG00000008283.CYB561	17	61509665	61523739	0.0626	rs4465659	2.41	rs3809721	0.0614	-5	-0.055	68	1	top1	0.061	7.8e-06	0.055	0.956
NA	./WEIGHTS//train_weights/Q9BXB4.ENSG00000144909.wgt.RDat	ENSG00000144909.OSBPL11	3	125247702	125313934	0.0677	rs4679170	-2.71	rs2922170	0.026227	4.11	-0.052	111	1	top1	0.026	0.0018	-0.052	0.95853
NA	./WEIGHTS//train_weights/Q8N0Z6.ENSG00000136319.wgt.RDat	ENSG00000136319.TTC5	14	20724717	20774153	0.1152	rs11851081	-3.332	rs2318864	0.112635	-6.78	0.464	156	5	lasso	0.12	6.9e-12	-0.0515	0.9589
NA	./WEIGHTS//train_weights/O60504.ENSG00000120896.wgt.RDat	ENSG00000120896.SORBS3	8	22402499	22433301	0.0823	rs3736147	3.61	rs11779261	-0.000237	3.3	-1.534	119	119	bslmm	0.025	0.0017	-0.0515	0.958966
NA	./WEIGHTS//train_weights/Q9NTG7.ENSG00000142082.wgt.RDat	ENSG00000142082.SIRT3	11	215458	236931	0.0488	rs4758635	-1.83	rs7930823	-0.002223	-3.41	0.945	106	106	blup	0.022	0.0023	-0.05094	0.95937
NA	./WEIGHTS//train_weights/O95154.ENSG00000162482.wgt.RDat	ENSG00000162482.AKR7A3	1	19609052	19615744	0.0695	rs3828102	-2.19	rs12133034	0.029111	-4.66	1.041	117	117	blup	0.05	7.5e-06	0.049	0.961
NA	./WEIGHTS//train_weights/O95267.ENSG00000172575.wgt.RDat	ENSG00000172575.RASGRP1	15	38780304	38857776	0.0639	rs4411472	3.03	rs7162389	0.01385	-3.38	1.088	128	128	bslmm	0.018	0.0089	0.04639	0.963
NA	./WEIGHTS//train_weights/P29590.ENSG00000140464.wgt.RDat	ENSG00000140464.PML	15	74287014	74340153	0.0648	rs10152173	-1.92	rs9944214	-0.00266	-3.21	0.469	84	84	bslmm	0.022	0.0025	-0.04559	0.96364
NA	./WEIGHTS//train_weights/P13667.ENSG00000155660.wgt.RDat	ENSG00000155660.PDIA4	7	148700154	148725733	0.1474	rs922411	-1.96	rs12534095	0.184475	8.59	0.335	64	8	enet	0.19	1.3e-18	0.0449	0.964
NA	./WEIGHTS//train_weights/P01877.ENSG00000211890.wgt.RDat	ENSG00000211890.IGHA2	14	106053226	106054732	0.1107	rs35590487	-0.615	rs10142224	0.037773	-3.79	0.14	13	13	bslmm	0.04	0.0002	-0.043	0.9657
NA	./WEIGHTS//train_weights/Q5T5U3.ENSG00000107863.wgt.RDat	ENSG00000107863.ARHGAP21	10	24872538	25012597	0.0491	rs1888656	-2.2	rs7911992	0.012623	-3.63	1.48	139	139	bslmm	0.028	0.00068	-0.04296	0.965732
NA	./WEIGHTS//train_weights/Q9BT22.ENSG00000033011.wgt.RDat	ENSG00000033011.ALG1	16	5083703	5137380	0.1914	rs8054738	2.14	rs7190704	0.0511	-4.45	0.404	82	82	bslmm	0.096	9.4e-10	0.04238	0.966
NA	./WEIGHTS//train_weights/Q9H2C0.ENSG00000261609.wgt.RDat	ENSG00000261609.GAN	16	81348557	81424489	0.0722	rs11859878	-2.53	rs2290948	0.0146	-3.71	-0.038	190	1	top1	0.015	0.011	0.038	0.97
NA	./WEIGHTS//train_weights/Q8NDH6.ENSG00000163596.wgt.RDat	ENSG00000163596.ICA1L	2	203640690	203736708	0.1162	rs7579055	-2.697	rs7582720	0.115769	7.21	0.036	81	1	top1	0.12	7.3e-12	0.036	0.971
NA	./WEIGHTS//train_weights/Q9NY65.ENSG00000183785.wgt.RDat	ENSG00000183785.TUBA8	22	18593097	18629321	0.1674	rs17742403	2.15	rs464541	0.054233	-5.67	-0.578	94	94	bslmm	0.11	6e-11	0.03665	0.971
NA	./WEIGHTS//train_weights/O95848.ENSG00000183828.wgt.RDat	ENSG00000183828.NUDT14	14	105639275	105647660	0.0543	rs10149501	-1.846	rs4983590	0.027782	-3.68	-0.036	69	1	top1	0.028	0.0018	0.036	0.9713
NA	./WEIGHTS//train_weights/Q8N9N7.ENSG00000180979.wgt.RDat	ENSG00000180979.LRRC57	15	42834720	42841000	0.0537	rs623271	-2.02	rs4924687	0.00802	4.27	0.207	44	5	enet	0.018	0.005	-0.03517	0.97194
NA	./WEIGHTS//train_weights/Q9BV44.ENSG00000134077.wgt.RDat	ENSG00000134077.THUMPD3	3	9404526	9428475	0.1793	rs2279440	-3.65	rs2251166	0.039793	-4.55	-2.595	98	98	bslmm	0.088	4e-09	0.0352	0.97195
NA	./WEIGHTS//train_weights/Q6P2E9.ENSG00000038358.wgt.RDat	ENSG00000038358.EDC4	16	67906926	67918406	0.0267	rs8052191	1.11	rs16942887	0.00988	3.33	0.468	43	6	enet	0.011	0.021	0.03475	0.972
NA	./WEIGHTS//train_weights/Q9UK00.ENSG00000088543.wgt.RDat	ENSG00000088543.C3orf18	3	50595462	50608458	0.0642	rs2040397	-2.08	rs13076850	0.082321	5.22	-0.109	49	49	blup	0.096	3.7e-06	0.0349	0.97216
NA	./WEIGHTS//train_weights/Q9ULK0.ENSG00000182771.wgt.RDat	ENSG00000182771.GRID1	10	87359312	88126250	0.1458	rs17105668	2.73	rs7075405	0.076662	-5.87	-0.032	459	459	bslmm	0.08	1.4e-08	-0.03421	0.972711
NA	./WEIGHTS//train_weights/A0FGR8.ENSG00000117868.wgt.RDat	ENSG00000117868.ESYT2	7	158523686	158622944	0.0665	rs9638144	-2.53	rs1061733	0.046536	-4.87	0.074	142	142	bslmm	0.065	3.2e-07	0.0342	0.973
NA	./WEIGHTS//train_weights/Q9NVG8.ENSG00000107021.wgt.RDat	ENSG00000107021.TBC1D13	9	131549483	131572711	0.1189	rs3750318	-1.224	rs15676	0.080564	6.21	-0.093	52	20	enet	0.09	1.7e-09	-0.0338	0.97304
NA	./WEIGHTS//train_weights/Q9NZ08.ENSG00000164307.wgt.RDat	ENSG00000164307.ERAP1	5	96096521	96143803	0.3732	rs17086651	-2.56	rs41135	0.259609	-10.8	-0.229	174	28	enet	0.46	1.4e-52	-0.0322	0.97432
NA	./WEIGHTS//train_weights/Q9H300.ENSG00000175193.wgt.RDat	ENSG00000175193.PARL	3	183547173	183602721	0.1132	rs262956	-2.23	rs3811724	0.078174	-5.4	0.032	143	1	top1	0.078	4.9e-08	-0.032	0.97447
NA	./WEIGHTS//train_weights/Q86V88.ENSG00000213920.wgt.RDat	ENSG00000213920.MDP1	14	24683143	24685276	0.1902	rs7155723	1.715	rs12589157	0.029241	4.21	-0.792	97	27	enet	0.058	1.4e-06	0.0314	0.9749
NA	./WEIGHTS//train_weights/Q8WVB3.ENSG00000169660.wgt.RDat	ENSG00000169660.HEXDC	17	80376194	80400521	0.2174	rs4073961	1.99	rs1141463	0.0723	4.52	0.566	88	88	bslmm	0.11	3.8e-08	0.03011	0.976
NA	./WEIGHTS//train_weights/Q9Y5J7.ENSG00000100575.wgt.RDat	ENSG00000100575.TIMM9	14	58875212	58894332	0.042	rs2145598	-1.682	rs10483699	0.045723	4.54	-0.124	37	6	lasso	0.048	1.2e-05	-0.0294	0.9766
NA	./WEIGHTS//train_weights/Q96HY7.ENSG00000181192.wgt.RDat	ENSG00000181192.DHTKD1	10	12110971	12165224	0.5642	rs10508438	-2.83	rs3740015	0.421606	12.25	0.089	99	99	bslmm	0.45	2.7e-47	0.02894	0.976916
NA	./WEIGHTS//train_weights/O75051.ENSG00000076356.wgt.RDat	ENSG00000076356.PLXNA2	1	208195587	208417665	0.0699	rs681241	-2.65	rs556625	0.030448	-4.86	0.234	263	6	lasso	0.033	0.00022	-0.0285	0.977
NA	./WEIGHTS//train_weights/Q6NXT6.ENSG00000169762.wgt.RDat	ENSG00000169762.TAPT1	4	16162128	16229033	0.0568	rs10034143	2.45	rs16893162	0.00463	4	0.672	142	142	bslmm	0.011	0.025	0.0286	0.977
NA	./WEIGHTS//train_weights/O95571.ENSG00000105755.wgt.RDat	ENSG00000105755.ETHE1	19	44010871	44031396	0.1457	rs433226	-1.92	rs2102954	0.051079	-5.96	0.953	111	14	enet	0.11	2.1e-11	0.0282	0.9775
NA	./WEIGHTS//train_weights/Q9UM54.ENSG00000196586.wgt.RDat	ENSG00000196586.MYO6	6	76458909	76629254	0.2129	rs4708201	1.96	rs1280054	0.261615	-10.5	0.497	143	15	enet	0.29	5.9e-30	0.0274	0.978
NA	./WEIGHTS//train_weights/Q5VTL8.ENSG00000134186.wgt.RDat	ENSG00000134186.PRPF38B	1	109234945	109244425	0.1321	rs2133199	-1.59	rs11102213	-0.000581	-3.04	-0.775	59	59	bslmm	0.036	0.00024	-0.0269	0.979
NA	./WEIGHTS//train_weights/P50479.ENSG00000131435.wgt.RDat	ENSG00000131435.PDLIM4	5	131593364	131609147	0.1336	rs3805665	-1.9	rs3900945	0.218461	9.28	0.292	123	23	enet	0.22	3e-22	0.0256	0.97956
NA	./WEIGHTS//train_weights/Q9Y4F1.ENSG00000152767.wgt.RDat	ENSG00000152767.FARP1	13	98794816	99102027	0.1163	rs9556943	3.79	rs17568378	0.019084	-4.36	-0.94	353	353	bslmm	0.065	4.4e-07	0.024	0.9808
NA	./WEIGHTS//train_weights/Q9UGM6.ENSG00000116874.wgt.RDat	ENSG00000116874.WARS2	1	119573839	119683294	0.2791	rs1557102	2.46	rs12029198	0.135802	-8.52	0.033	124	22	enet	0.19	1.2e-18	-0.0232	0.981
NA	./WEIGHTS//train_weights/Q8WTR2.ENSG00000162999.wgt.RDat	ENSG00000162999.DUSP19	2	183943287	183964733	0.1076	rs2675075	-1.624	rs16824018	0.061956	-4.65	-0.345	76	17	enet	0.079	7.4e-07	-0.0229	0.982
NA	./WEIGHTS//train_weights/P00491.ENSG00000198805.wgt.RDat	ENSG00000198805.PNP	14	20937113	20945253	0.0698	rs1760945	3.183	rs1049564	0.058126	-4.97	0.021	166	1	top1	0.058	1.3e-06	-0.021	0.9832
NA	./WEIGHTS//train_weights/Q9UI15.ENSG00000144834.wgt.RDat	ENSG00000144834.TAGLN3	3	111717511	111732734	0.0521	rs4682327	-2.47	rs1530343	0.039151	4.66	0.167	159	4	lasso	0.044	2.5e-05	-0.0207	0.98349
NA	./WEIGHTS//train_weights/Q9BZ76.ENSG00000106714.wgt.RDat	ENSG00000106714.CNTNAP3	9	39072764	39288312	0.224	rs11787943	0.223	rs4961901	-0.001144	1.52	0.223	2	2	enet	0.044	0.00088	0.0179	0.98568
NA	./WEIGHTS//train_weights/P10620.ENSG00000008394.wgt.RDat	ENSG00000008394.MGST1	12	16500076	16762193	0.1941	rs7303782	2.39	rs2239675	0.058194	5.47	0.87	104	7	lasso	0.16	4.1e-16	0.0173	0.986
NA	./WEIGHTS//train_weights/O15067.ENSG00000178921.wgt.RDat	ENSG00000178921.PFAS	17	8150936	8173809	0.1849	rs3744647	2.59	rs3826543	0.263	9.98	0.685	111	9	lasso	0.27	2.1e-27	-0.01545	0.988
NA	./WEIGHTS//train_weights/Q9C0E8.ENSG00000144320.wgt.RDat	ENSG00000144320.KIAA1715	2	176788620	176867567	0.0906	rs847151	-1.834	rs935406	0.049907	-4.51	-0.015	127	1	top1	0.05	7.3e-06	0.015	0.988
NA	./WEIGHTS//train_weights/P55145.ENSG00000145050.wgt.RDat	ENSG00000145050.MANF	3	51422478	51426828	0.039	rs11715034	-1.23	rs751075	0.022218	-4.2	0.047	73	73	blup	0.023	0.002	0.0143	0.98861
NA	./WEIGHTS//train_weights/Q02127.ENSG00000102967.wgt.RDat	ENSG00000102967.DHODH	16	72042487	72058954	0.4181	rs16973520	-3.79	rs7184117	0.245	-9.75	-0.095	126	126	bslmm	0.3	3.3e-31	0.01211	0.99
NA	./WEIGHTS//train_weights/P18065.ENSG00000115457.wgt.RDat	ENSG00000115457.IGFBP2	2	217497551	217529159	0.0457	rs10932663	3.026	rs922987	0.001988	3.6	-0.614	119	119	bslmm	0.012	0.018	0.0122	0.99
NA	./WEIGHTS//train_weights/Q9UGC7.ENSG00000112031.wgt.RDat	ENSG00000112031.MTRF1L	6	153308497	153323820	0.1166	rs11155881	2.72	rs766127	0.136585	-6.34	-0.012	146	1	top1	0.14	5.3e-11	0.012	0.99
NA	./WEIGHTS//train_weights/P23141.ENSG00000198848.wgt.RDat	ENSG00000198848.CES1	16	55836763	55867249	0.1147	rs6499795	2.51	rs11076121	0.0695	5.45	0.155	118	4	lasso	0.072	1.4e-07	0.00945	0.992
NA	./WEIGHTS//train_weights/Q8IXB1.ENSG00000077232.wgt.RDat	ENSG00000077232.DNAJC10	2	183580999	183659191	0.0475	rs16823704	2.102	rs415994	0.009509	-3.55	0.094	113	113	blup	0.025	0.0011	-0.0102	0.992
NA	./WEIGHTS//train_weights/Q15404.ENSG00000148484.wgt.RDat	ENSG00000148484.RSU1	10	16632610	16859527	0.0704	rs10904833	-2.57	rs1797076	0.04713	4.79	0.49	249	5	lasso	0.05	9.3e-06	0.00691	0.994488
NA	./WEIGHTS//train_weights/O00214.ENSG00000116977.wgt.RDat	ENSG00000116977.LGALS8	1	236681300	236716281	0.0567	rs637489	-2.77	rs2243527	0.000571	-3.77	0.078	167	167	bslmm	0.0074	0.054	-0.0058	0.995
NA	./WEIGHTS//train_weights/Q9UH03.ENSG00000100167.wgt.RDat	ENSG00000100167.SEPT3	22	42372276	42394225	0.0727	rs10154700	2.03	rs133295	0.030777	3.77	0.23	81	2	lasso	0.038	8.1e-05	0.00588	0.995
NA	./WEIGHTS//train_weights/P0C870.ENSG00000243789.wgt.RDat	ENSG00000243789.JMJD7	15	42120283	42129779	0.0751	rs11070352	-1.19	rs8025614	0.10314	-6.51	-0.012	96	2	lasso	0.12	2.7e-11	-0.00619	0.99506
NA	./WEIGHTS//train_weights/O14523.ENSG00000172375.wgt.RDat	ENSG00000172375.C2CD2L	11	118972908	118989252	0.0791	rs599385	-3.48	rs4938626	0.069544	-5.64	0.005	101	1	top1	0.07	1.3e-07	-0.005	0.99601
NA	./WEIGHTS//train_weights/Q9Y3B8.ENSG00000076043.wgt.RDat	ENSG00000076043.REXO2	11	114310108	114321001	0.113	rs2852438	2.43	rs11214990	0.022854	-4	-0.338	102	10	lasso	0.036	0.00012	0.00358	0.99714
NA	./WEIGHTS//train_weights/Q6S5L8.ENSG00000185634.wgt.RDat	ENSG00000185634.SHC4	15	49115932	49255641	0.0488	rs8029751	-3.56	rs11070664	-0.00143	-3.19	1.235	144	144	blup	0.019	0.015	-0.00353	0.99719
NA	./WEIGHTS//train_weights/Q8TB22.ENSG00000006282.wgt.RDat	ENSG00000006282.SPATA20	17	48620419	48633213	0.4393	rs7208018	-2.01	rs878619	0.3	-10.89	0.781	102	102	bslmm	0.48	1.3e-54	-0.00186	0.999
NA	./WEIGHTS//train_weights/Q9Y2S7.ENSG00000004142.wgt.RDat	ENSG00000004142.POLDIP2	17	26673659	26684545	0.0436	NA	NA	NA	NA	NA	NA	0	0	enet	9.8e-05	0.31	NA	NA
NA	./WEIGHTS//train_weights/O94887.ENSG00000006607.wgt.RDat	ENSG00000006607.FARP2	2	242295658	242434256	0.1585	NA	NA	NA	NA	NA	NA	121	0	bslmm	0.12	4.3e-10	NA	NA
NA	./WEIGHTS//train_weights/P23919.ENSG00000168393.wgt.RDat	ENSG00000168393.DTYMK	2	242615157	242626406	0.0462	NA	NA	NA	NA	NA	NA	33	0	enet	0.018	0.0056	NA	NA
NA	./WEIGHTS//train_weights/Q8N465.ENSG00000180902.wgt.RDat	ENSG00000180902.D2HGDH	2	242673994	242708231	0.2334	NA	NA	NA	NA	NA	NA	22	0	top1	0.26	2.1e-26	NA	NA
NA	./WEIGHTS//train_weights/Q9Y4P1.ENSG00000168397.wgt.RDat	ENSG00000168397.ATG4B	2	242576628	242613272	0.0362	NA	NA	NA	NA	NA	NA	45	0	blup	0.0087	0.039	NA	NA
NA	./WEIGHTS//train_weights/P80748.ENSG00000211662.wgt.RDat	ENSG00000211662.IGLV3-21	22	23054174	23055688	0.0288	NA	NA	NA	NA	NA	NA	7	0	top1	0.032	0.0012	NA	NA
NA	./WEIGHTS//train_weights/Q7Z6L1.ENSG00000205356.wgt.RDat	ENSG00000205356.TECPR1	7	97843936	97881563	0.2819	NA	NA	NA	NA	NA	NA	90	0	top1	0.11	4.6e-11	NA	NA
NA	./WEIGHTS//train_weights/P08908.ENSG00000178394.wgt.RDat	ENSG00000178394.HTR1A	5	63256183	63258334	0.0615	NA	NA	NA	NA	NA	NA	41	0	top1	0.022	0.0026	NA	NA
NA	./WEIGHTS//train_weights/Q9HDC9.ENSG00000101474.wgt.RDat	ENSG00000101474.APMAP	20	24943561	24973615	0.0392	NA	NA	NA	NA	NA	NA	120	0	top1	0.026	0.001	NA	NA
