# Supplementary material for: Joint analysis of proteome, transcriptome, and multi-trait analysis to identify novel Parkinson’s disease risk genes
Source: Aging (Albany NY). 2024 Jan 17;16(2):1555–80. doi: 10.18632/aging.205444 (PMC10866412; doi:10.18632/aging.205444)
Supplement: Supplementary Table 4 [file aging-16-205444-s004.xlsx]

## Sheet: Additional file3(Table S2)
Supplementary Tabel 4. The PWAS of PD integrating the Banner proteomes with the PD GWAS.
ID	CHR	P0	P1	BEST.GWAS.ID	EQTL.ID	EQTL.Z	EQTL.GWAS.Z	PWAS.Z	PWAS.P
ENSG00000004468.CD38	4	15779898	15854853	rs4698412	rs1110258	-4.85	3.571	-5.9856	2.16e-09
ENSG00000136235.GPNMB	7	23275586	23314727	rs466225	rs7808488	-5.22	-5.694	5.694	1.24e-08
ENSG00000167397.VKORC1	16	31102163	31107301	rs8086857	rs2855475	3.85	5.075	5.075	3.87e-07
ENSG00000178950.GAK	4	843064	926161	rs6599389	rs17783233	-3.85	5.463	-4.4939	6.99e-06
ENSG00000100299.ARSA	22	51061182	51066607	rs6151429	rs2071421	-6.66	-3.629	3.9633	7.39e-05
ENSG00000164733.CTSB	8	11700033	11726957	rs1293298	rs1692821	5.81	-3.909	-3.909	9.27e-05
ENSG00000168297.PXK	3	58318607	58411748	rs6445961	rs4681679	-4.28	3.545	-3.545	0.000393
ENSG00000196704.AMZ2	17	66243715	66253297	rs8080714	rs3213690	-8.12	3.46	-3.46	0.00054
ENSG00000174939.ASPHD1	16	29911696	29931185	rs11646118	rs4787483	4.79	-1.974	-3.4531	0.000554
ENSG00000169599.NFU1	2	69622882	69664760	rs13416004	rs11690738	3.95	-2.687	-3.4468	0.000567
ENSG00000172269.DPAGT1	11	118967213	118979041	rs599385	rs2509049	-3.65	-3.347	3.347	0.000817
ENSG00000085491.SLC25A24	1	108676658	108743471	rs2336507	rs533233	-8.57	3.008	-3.2811	0.00103
ENSG00000107651.SEC23IP	10	121652223	121702014	rs11199129	rs2271124	-7.08	-4.279	3.2587	0.00112
ENSG00000078070.MCCC1	3	182733006	182833863	rs10513789	rs1502762	-6.34	-3.853	3.2391	0.001199
ENSG00000105854.PON2	7	95034175	95064510	rs2299263	rs7785846	-9.11	-3.178	3.2239	0.00126
ENSG00000152223.EPG5	18	43427574	43547240	rs1111937	rs3826634	3.66	1.854	3.204	0.00136
ENSG00000120913.PDLIM2	8	22435792	22455538	rs3736147	rs4592028	-3.46	2.756	-3.1638	0.00156
ENSG00000100580.TMED8	14	77801364	77843452	rs8012228	rs12435136	5.73	-2.385	-3.1597	0.00158
ENSG00000105552.BCAT2	19	49298319	49314286	rs506425	rs10413941	4.63	3.137	3.137	0.00171
ENSG00000160360.GPSM1	9	139221932	139254057	rs4400499	rs3812547	-3.6	2.174	-3.0402	0.00236
ENSG00000001561.ENPP4	6	46097730	46114436	rs976083	rs995564	5.88	-3.217	-3.0133	0.00258
ENSG00000162642.C1orf52	1	85715639	85725355	rs2735592	rs2735592	-3.6	-3.001	3.001	0.00269
ENSG00000054983.GALC	14	88304164	88460009	rs119512	rs10144207	8.27	3.34	2.9896	0.00279
ENSG00000116663.FBXO6	1	11724181	11734411	rs2745276	rs747862	-4.27	2.973	-2.973	0.00295
ENSG00000204217.BMPR2	2	203241659	203432474	rs7586383	rs6715945	-3.12	-1.751	2.9188	0.003513
ENSG00000120756.PLS1	3	142315229	142432506	rs6809448	rs7636909	4.2	2.898	2.898	0.003756
ENSG00000119242.CCDC92	12	124403207	124457378	rs7956959	rs12311114	-10.02	2.834	-2.843	0.00447
ENSG00000143819.EPHX1	1	225997794	226033260	rs10753410	rs10753410	-3.89	2.827	-2.827	0.0047
ENSG00000164615.CAMLG	5	134074191	134087847	rs34765815	rs2108665	-6.1	-2.827	2.827	0.0047
ENSG00000100266.PACSIN2	22	43231418	43411151	rs2024645	rs2899365	5.42	2.34	2.8262	0.00471
ENSG00000140403.DNAJA4	15	78556428	78574538	rs11072745	rs2037347	5.34	-1.841	-2.821	0.00479
ENSG00000138074.SLC5A6	2	27422455	27435826	rs4665963	rs1561535	-3.91	2.66	-2.8033	0.005058
ENSG00000131095.GFAP	17	42982376	42994305	rs1071682	rs17629022	-4.74	2.725	-2.798	0.00514
ENSG00000133195.SLC39A11	17	70642088	71088851	rs16977430	rs11868480	-3.54	-0.344	2.787	0.00532
ENSG00000148057.IDNK	9	86237964	86259045	rs7863215	rs2780976	-4.77	2.751	-2.751	0.00594
ENSG00000140474.ULK3	15	75128457	75135687	rs936227	rs936227	8.48	-3.058	-2.745	0.00605
ENSG00000196839.ADA	20	43248163	43280874	rs6031753	rs2007720	5.77	-1.983	-2.7145	0.00664
ENSG00000140105.WARS	14	100800125	100843142	rs1951519	rs11160582	-5.04	-2.661	2.661	0.00779
ENSG00000196126.HLA-DRB1	6	32546546	32557625	rs660895	rs674313	-4.11	1.881	-2.6396	0.0083
ENSG00000177380.PPFIA3	19	49622646	49654283	rs3745297	rs2278004	-3.56	-2.639	2.639	0.00832
ENSG00000172346.CSDC2	22	41956767	41973745	rs727563	rs9611602	5.6	-2.719	-2.5759	0.01
ENSG00000173992.CCS	11	66360292	66373490	rs2275998	rs2275998	-4.55	2.537	-2.537	0.011181
ENSG00000178252.WDR6	3	49044495	49053386	rs1134591	rs7626445	4.67	-2.64	-2.5077	0.012151
ENSG00000152556.PFKM	12	48498922	48540187	rs1476607	rs10875746	-7.7	-2.303	2.5075	0.01216
ENSG00000180011.ZADH2	18	72907063	72921303	rs4891050	rs7230037	-4.52	2.498	-2.498	0.01249
ENSG00000157654.PALM2-AKAP2	9	112542589	112934792	rs10980068	rs10739287	-3.27	1.111	2.4861	0.01291
ENSG00000151806.GUF1	4	44680444	44702943	rs1439354	rs2046910	-6.11	-2.48	2.48	0.0131
ENSG00000183605.SFXN4	10	120900279	120925179	rs11198845	rs10749291	-7.04	2.471	-2.471	0.01347
ENSG00000172375.C2CD2L	11	118972908	118989252	rs599385	rs4245191	3.61	2.861	2.4459	0.014448
ENSG00000115977.AAK1	2	69688532	69901481	rs13416004	rs6725791	-3.69	-2.486	2.4422	0.014599
ENSG00000131981.LGALS3	14	55590828	55612126	rs8019978	rs9806049	-3.84	-2.432	2.432	0.01502
ENSG00000066926.FECH	18	55215515	55254004	rs317826	rs7229750	3.07	1.35	2.431	0.01505
ENSG00000077522.ACTN2	1	236849754	236927931	rs2385494	rs819643	4.4	2.201	2.4308	0.01507
ENSG00000088387.DOCK9	13	99445741	99738879	rs9517533	rs4772158	-4.1	-1.419	2.4262	0.0153
ENSG00000148384.INPP5E	9	139323071	139334274	rs4400499	rs11146021	-4.3	2.468	-2.4146	0.01575
ENSG00000110218.PANX1	11	93862094	93915138	rs1138800	rs11607757	-4.75	1.78	-2.3966	0.01655
ENSG00000150456.N6AMT2	13	21302870	21348097	rs4146442	rs9579937	-4.05	-2.49	2.3834	0.0172
ENSG00000273079.GRIN2B	12	13693165	14133053	rs1421108	rs11608748	-4.25	-1.569	2.3638	0.01809
ENSG00000066084.DIP2B	12	50898768	51142450	rs7306677	rs7977742	-3.4	1.854	-2.3438	0.01909
ENSG00000149089.APIP	11	34874641	34938046	rs2986429	rs2288667	9.45	-2.342	-2.342	0.019181
ENSG00000124207.CSE1L	20	47662849	47713489	rs1556876	rs3091529	5.02	2.199	2.3319	0.01971
ENSG00000182253.SYNM	15	99638420	99675798	rs7178187	rs2305445	8.02	-2.325	-2.325	0.02007
ENSG00000124588.NQO2	6	2988221	3019996	rs9378352	rs1143684	-6.87	-1.878	2.3111	0.02083
ENSG00000213689.TREX1	3	48506445	48509044	rs6776700	rs9826195	-5.04	-2.024	2.3041	0.021218
ENSG00000091542.ALKBH5	17	18086392	18113268	rs854764	rs854793	-3.59	-1.055	2.289	0.02206
ENSG00000105186.ANKRD27	19	33087913	33167503	rs1827700	rs259228	-3.29	0.128	2.2828	0.02244
ENSG00000074706.IPCEF1	6	154475631	154677926	rs12208947	rs12208947	-4.65	-2.452	2.2614	0.02373
ENSG00000113734.BNIP1	5	172571445	172591390	rs1123336	rs17662639	-6.64	-2.204	2.2485	0.0245
ENSG00000144567.FAM134A	2	220040947	220050201	rs17655123	rs17655123	-7.16	-2.196	2.2424	0.024935
ENSG00000090861.AARS	16	70286198	70323446	rs2070203	rs4985407	-5.26	2.216	-2.216	0.0267
ENSG00000147576.ADHFE1	8	67342420	67383836	rs16932810	rs1060242	-8.02	-1.537	2.2014	0.0277
ENSG00000011295.TTC19	17	15902694	15948329	rs4566208	rs12603728	3.42	0.316	-2.199	0.02787
ENSG00000087884.AAMDC	11	77532155	77629478	rs1630344	rs2051484	-10.46	-2.347	2.1984	0.027921
ENSG00000117020.AKT3	1	243651535	244014381	rs10927035	rs6671475	3.76	3.247	2.1861	0.02881
ENSG00000165119.HNRNPK	9	86582998	86595569	rs7853235	rs10868083	-3.82	-2.344	2.1594	0.03082
ENSG00000115947.ORC4	2	148687968	148779147	rs10180469	rs2288190	4.33	2.159	2.159	0.03085
ENSG00000029725.RABEP1	17	5185558	5289129	rs1806264	rs1806264	5.59	2.152	2.152	0.0314
ENSG00000146729.GBAS	7	56019486	56067874	rs10245725	rs7793921	4.9	-2.363	-2.15212	0.0314
ENSG00000120910.PPP3CC	8	22298332	22398652	rs3736147	rs2469745	-5.73	-2.152	2.152	0.0314
ENSG00000197713.RPE	2	210867289	210886300	rs12468576	rs7570090	-3.51	1.658	-2.1478	0.03173
ENSG00000120526.NUDCD1	8	110253148	110346614	rs7008687	rs11550169	-4.67	-0.272	2.143	0.0321
ENSG00000169288.MRPL1	4	78783674	78873944	rs1546318	rs17409255	-4.99	-1.306	2.1423	0.0322
ENSG00000158109.TPRG1L	1	3541566	3546691	rs6697749	rs2821007	-5.86	-2.141	2.141	0.03227
ENSG00000182149.IST1	16	71879899	71962913	rs16973520	rs7198834	-4.94	0.183	-2.1406	0.0323
ENSG00000180616.SSTR2	17	71161151	71167185	rs10512594	rs12942652	-3.97	-2.137	2.137	0.0326
ENSG00000124587.PEX6	6	42931608	42946958	rs1129187	rs4714634	3.68	2.132	2.132	0.03301
ENSG00000007174.DNAH9	17	11501748	11873065	rs2215008	rs34487424	-3.8	1.036	-2.103	0.03545
ENSG00000163406.SLC15A2	3	121612936	121662949	rs6776670	rs3805134	-5.84	-2.099	2.099	0.035817
ENSG00000138030.KHK	2	27309615	27323640	rs920433	rs2384572	-7.59	1.985	-2.0989	0.035829
ENSG00000159131.GART	21	34876238	34915797	rs4817579	rs2834234	-9.64	2.098	-2.098	0.0359
ENSG00000115129.TP53I3	2	24300303	24308731	rs17712391	rs1134516	-5.29	1.805	-2.0791	0.037608
ENSG00000087274.ADD1	4	2845584	2931803	rs7678161	rs2097081	-7.97	-2.056	2.056	0.0398
ENSG00000143155.TIPRL	1	168148171	168169950	rs2072778	rs1543358	-4.36	-2.043	2.043	0.04105
ENSG00000146733.PSPH	7	56078744	56119297	rs2135116	rs10499761	-3.92	2.026	-2.026	0.0428
ENSG00000182534.MXRA7	17	74668633	74707098	rs2429452	rs2286585	-4.79	2.02	-2.02	0.04338
ENSG00000139190.VAMP1	12	6571403	6580153	rs2250246	rs12964	-3.42	-1.8	2.0172	0.04367
ENSG00000163743.RCHY1	4	76404247	76439974	rs6832912	rs13152113	4.53	-1.483	-2.0036	0.0451
ENSG00000167186.COQ7	16	19078921	19091417	rs7192898	rs7192898	7.05	-2.001	-2.001	0.0454
ENSG00000144040.SFXN5	2	73169165	73302747	rs12619068	rs10183113	5.04	1.913	1.9992	0.045589
ENSG00000175662.TOM1L2	17	17746828	17875736	rs3818717	rs4925115	-5.43	-2.308	1.987	0.04688
ENSG00000138834.MAPK8IP3	16	1756184	1820318	rs8058190	rs9888765	2.95	-1.78	-1.9788	0.0478
ENSG00000216490.IFI30	19	18283972	18288927	rs11667487	rs11554159	-4.44	1.964	-1.964	0.04953
ENSG00000140284.SLC27A2	15	50474393	50528592	rs12904370	rs2278167	4.69	-2.239	-1.964	0.04955
ENSG00000110429.FBXO3	11	33762485	33796089	rs831607	rs2273121	-3.73	-1.958	1.958	0.05023
ENSG00000085377.PREP	6	105725440	105850959	rs1325419	rs9500087	-4.4	-1.746	1.9434	0.05197
ENSG00000166426.CRABP1	15	78632666	78640572	rs6495296	rs9920270	-4.58	2.283	-1.942	0.05213
ENSG00000169359.SLC33A1	3	155538813	155572218	rs6809229	rs358703	-4.08	-1.732	1.9393	0.052459
ENSG00000122359.ANXA11	10	81910645	81965328	rs1953600	rs2245168	6.26	-2.216	-1.9254	0.05418
ENSG00000158806.NPM2	8	21881636	21894408	rs6557781	rs13256571	3.37	0.192	1.9112	0.056
ENSG00000129515.SNX6	14	35030300	35099389	rs10220690	rs12880885	5.06	1.463	1.9089	0.05628
ENSG00000197150.ABCB8	7	150725510	150744869	rs2303933	rs11770520	-4.61	-1.405	1.89464	0.0581
ENSG00000130592.LSP1	11	1874200	1913497	rs689363	rs907611	3.99	1.87	1.8944	0.058178
ENSG00000151690.MFSD6	2	191273081	191373931	rs3811607	rs12998288	-3.84	-2.109	1.8917	0.05853
ENSG00000135678.CPM	12	69235977	69365350	rs7315435	rs17106030	-5.47	1.923	-1.8906	0.05867
ENSG00000115380.EFEMP1	2	56093102	56151274	rs6545522	rs3791676	-3.8	-0.965	1.8863	0.059257
ENSG00000072778.ACADVL	17	7120444	7128592	rs1215	rs446994	3.97	-1.884	-1.884	0.05956
ENSG00000144115.THNSL2	2	88469835	88486146	rs17350803	rs10865489	-5.23	0.647	-1.88	0.060107
ENSG00000145214.DGKQ	4	952675	980683	rs6599389	rs3775122	-4.02	6.133	-1.8797	0.0602
ENSG00000149927.DOC2A	16	30016830	30034591	rs8061772	rs35105141	4.16	-1.875	-1.875	0.0608
ENSG00000182919.C11orf54	11	93474757	93497915	rs12289146	rs652961	10.05	1.874	1.874	0.06093
ENSG00000105928.DFNA5	7	24737972	24809244	rs10248833	rs2237306	5.49	-0.629	-1.87029	0.0614
ENSG00000133835.HSD17B4	5	118788138	118972894	rs257970	rs32665	-7.7	1.719	-1.8656	0.0621
ENSG00000108774.RAB5C	17	40276994	40307035	rs6503688	rs8081327	3.8	-1.848	-1.864	0.06229
ENSG00000181291.TMEM132E	17	32907768	32966337	rs9906177	rs17662779	-5.21	1.864	-1.864	0.06232
ENSG00000141759.TXNL4A	18	77732867	77793949	rs2298643	rs11081582	4.24	1.658	1.863	0.06242
ENSG00000198498.TMA16	4	164415594	164441691	rs17576350	rs9993575	4.54	1.863	1.863	0.0625
ENSG00000178814.OPLAH	8	145106167	145118735	rs11779776	rs7829844	-4.15	-0.583	1.8615	0.0627
ENSG00000089597.GANAB	11	62392298	62414104	rs4489748	rs1058678	-4.23	0.177	-1.8563	0.06341
ENSG00000184144.CNTN2	1	205012325	205047627	rs3851294	rs4950978	-3.67	-0.937	1.8526	0.06394
ENSG00000138134.STAMBPL1	10	90639491	90734910	rs11202898	rs6586154	-3.46	2.074	-1.8509	0.06418
ENSG00000125877.ITPA	20	3189514	3204516	rs2295547	rs6139030	-8.48	0.028	-1.8482	0.06457
ENSG00000167220.HDHD2	18	44633774	44676891	rs2668773	rs2117373	6.32	2.342	1.847	0.06468
ENSG00000153132.CLGN	4	141309609	141349122	rs11934649	rs17005845	-3.82	1.215	-1.8464	0.0648
ENSG00000204128.C2orf72	2	231902205	231914434	rs4972980	rs2276623	4.2	1.273	1.8385	0.065991
ENSG00000093010.COMT	22	19929130	19957498	rs1978058	rs4680	9.24	1.836	1.836	0.0664
ENSG00000084073.ZMPSTE24	1	40723779	40759856	rs6691598	rs6682701	-4.96	1.834	-1.8346	0.06657
ENSG00000100600.LGMN	14	93170152	93215047	rs1242112	rs8177528	-3.72	2.2	-1.8333	0.06675
ENSG00000178802.MPI	15	75182346	75191798	rs936227	rs11072512	-5.85	-1.819	1.819	0.06891
ENSG00000101460.MAP1LC3A	20	33134658	33148149	rs6142206	rs6059909	4.27	2.529	1.8175	0.06913
ENSG00000125818.PSMF1	20	1093906	1160596	rs16991645	rs6514113	-4.31	-1.816	1.816	0.06937
ENSG00000113296.THBS4	5	79287134	79379110	rs4535437	rs2438638	3.67	1.335	1.8157	0.0694
ENSG00000116120.FARSB	2	223435255	223521056	rs11692810	rs1347630	-3.79	1.546	-1.8012	0.071678
ENSG00000185963.BICD2	9	95473645	95527094	rs7864889	rs6479426	3.95	-1.754	-1.799	0.07202
ENSG00000118777.ABCG2	4	89011416	89152474	rs7696304	rs1481012	-7.49	-1.792	1.792	0.0731
ENSG00000135597.REPS1	6	139224630	139309398	rs1188857	rs7769274	-3.89	-1.905	1.7856	0.07416
ENSG00000167701.GPT	8	145728356	145732557	rs10111332	rs3816732	-3.33	-1.764	1.764	0.0777
ENSG00000126934.MAP2K2	19	4090319	4124126	rs7251928	rs350912	5.03	1.764	1.764	0.07773
ENSG00000103876.FAH	15	80444832	80479288	rs12595624	rs1370276	5	1.41	1.762	0.07806
ENSG00000063241.ISOC2	19	55964352	55973710	rs10421563	rs751152	-4.65	0.683	-1.7607	0.07829
ENSG00000133789.SWAP70	11	9685624	9774538	rs737617	rs10770056	4.94	0.248	-1.7602	0.078368
ENSG00000187239.FNBP1	9	132649466	132805473	rs7025992	rs4240438	4.22	1.756	1.756	0.07909
ENSG00000183208.GDPGP1	15	90777040	90785315	rs4324103	rs7342665	-7.64	-1.843	1.75	0.08014
ENSG00000167508.MVD	16	88718343	88729569	rs7203305	rs4782309	4.75	-1.362	-1.7362	0.0825
ENSG00000142453.CARM1	19	10982189	11033453	rs11085752	rs11085752	4.95	1.726	1.726	0.08435
ENSG00000178074.C2orf69	2	200775979	200820658	rs203772	rs16832017	-5.46	2.487	-1.7205	0.08534
ENSG00000102743.SLC25A15	13	41363548	41384247	rs1854420	rs7337312	5	-1.72	-1.72	0.0854
ENSG00000143727.ACP1	2	264140	278283	rs6724817	rs11553746	-6.29	1.69	-1.718	0.08579
ENSG00000198053.SIRPA	20	1875154	1920543	rs200880	rs6075340	-10.1	-1.716	1.716	0.08616
ENSG00000146574.CCZ1B	7	6833765	6866401	rs12673800	rs4724860	-3.66	1.615	-1.71407	0.0865
ENSG00000130787.HIP1R	12	123319000	123347507	rs11060180	rs1696320	-3.27	-1.081	-1.7131	0.0867
ENSG00000162377.COA7	1	53152508	53164038	rs7518390	rs269319	-6.48	-1.709	1.709	0.08745
ENSG00000151693.ASAP2	2	9346894	9545812	rs4610024	rs7605582	-4.95	1.709	-1.709	0.087451
ENSG00000122012.SV2C	5	75378997	75649764	rs2972853	rs10054931	3.35	0.67	1.7079	0.0877
ENSG00000022277.RTFDC1	20	55043647	55093943	rs11905734	rs1059768	-5.69	-1.706	1.706	0.08801
ENSG00000103707.MTFMT	15	65294845	65321977	rs1631677	rs7175761	3.51	1.631	1.688	0.09151
ENSG00000115073.ACTR1B	2	98272431	98280570	rs17695937	rs11692435	-5.24	-1.686	1.686	0.091796
ENSG00000058453.CROCC	1	17066768	17299474	rs9435739	rs9435739	3.9	-1.686	-1.686	0.0918
ENSG00000158092.NCK1	3	136581050	136668665	rs6767642	rs6786302	-4.41	-1.477	1.6815	0.092672
ENSG00000101474.APMAP	20	24943561	24973615	rs6114995	rs6138482	4.08	-1.681	-1.681	0.09276
ENSG00000140400.MAN2C1	15	75648133	75660971	rs4886702	rs11853141	3.87	-1.676	-1.676	0.09374
ENSG00000116791.CRYZ	1	75171170	75199092	rs10493546	rs525487	6.31	2.14	1.6732	0.09428
ENSG00000143727.ACP1	2	264140	278283	rs6724817	rs7605824	-9.89	1.673	-1.673	0.094327
ENSG00000157181.C1orf27	1	186344890	186390510	rs3131549	rs1299376	-5.02	0.149	-1.6673	0.09545
ENSG00000196502.SULT1A1	16	28616903	28634946	rs2411453	rs7186573	-6.7	-1.871	1.6644	0.096
ENSG00000049239.H6PD	1	9294834	9331396	rs10489436	rs2268175	-5.02	1.649	-1.649	0.09915
ENSG00000166171.DPCD	10	103330317	103369425	rs3915773	rs7006	6.61	1.647	1.647	0.09956
ENSG00000203667.COX20	1	244998624	245008359	rs4351623	rs9727443	-3.78	2.014	-1.6468	0.09959
ENSG00000159082.SYNJ1	21	34001069	34100359	rs2833967	rs1782954	-3.37	0.387	-1.644	0.1002
ENSG00000135090.TAOK3	12	118587606	118810750	rs468574	rs7957470	-3.98	-1.314	1.6402	0.10096
ENSG00000137513.NARS2	11	78147007	78285919	rs2063724	rs7936011	-4.36	-1.64	1.64	0.101005
ENSG00000100714.MTHFD1	14	64854749	64926722	rs1950902	rs2357694	-10.89	1.634	-1.634	0.10226
ENSG00000138413.IDH1	2	209100951	209130798	rs6751157	rs7593466	-3.78	0.68	-1.6322	0.102631
ENSG00000172935.MRGPRF	11	68771863	68780877	rs11228450	rs2846196	7.26	-1.632	-1.632	0.102679
ENSG00000108064.TFAM	10	60144782	60158981	rs12247015	rs2279340	-4.02	1.627	-1.627	0.10374
ENSG00000175309.PHYKPL	5	177635498	177659792	rs1544928	rs12652833	-3.84	-0.433	1.6221	0.1048
ENSG00000130348.QRSL1	6	107077453	107116292	rs11968442	rs3121445	-6.39	1.148	-1.6204	0.10514
ENSG00000148090.AUH	9	93976097	94124195	rs10512210	rs4743820	3.89	1.62	1.62	0.10523
ENSG00000065613.SLK	10	105726959	105788991	rs4917404	rs7924310	3.68	-1.449	-1.6179	0.10567
ENSG00000102547.CAB39L	13	49882786	50018262	rs11619804	rs4941638	-7.57	-1.616	1.616	0.1061
ENSG00000100889.PCK2	14	24563262	24579807	rs10147475	rs2759409	3.12	-0.44	1.6068	0.1081
ENSG00000187688.TRPV2	17	16318856	16340317	rs3112518	rs3813769	-9.28	1.432	-1.606	0.10836
ENSG00000181019.NQO1	16	69740899	69760854	rs7198242	rs12595869	-9.6	-1.605	1.602	0.109
ENSG00000112210.RAB23	6	57053607	57087078	rs1888265	rs3800018	3.8	1.977	1.5961	0.11047
ENSG00000169609.C15orf40	15	83657193	83680393	rs6603042	rs11259964	7.34	1.558	1.594	0.111
ENSG00000111911.HINT3	6	126277927	126301387	rs9388462	rs10485179	-4.98	-2.594	1.5916	0.11147
ENSG00000141556.TBCD	17	80709940	80900724	rs11869930	rs9747334	7.33	-1.019	-1.588	0.11232
ENSG00000124370.MCEE	2	71336814	71357369	rs2080643	rs6725113	-9.29	1.73	-1.5757	0.115097
ENSG00000132182.NUP210	3	13357737	13461809	rs12632098	rs9874760	3.95	-1.321	-1.5737	0.115548
ENSG00000160285.LSS	21	47608055	47648738	rs2839189	rs914247	-7.27	-1.949	1.572	0.1159
ENSG00000087274.ADD1	4	2845584	2931803	rs7678161	rs1263345	3.79	-1.57	-1.57	0.116
ENSG00000124831.LRRFIP1	2	238536219	238722325	rs919973	rs734388	-5.45	-1.94	1.5645	0.117689
ENSG00000157851.DPYSL5	2	27070615	27173219	rs10181777	rs4513249	-4.91	2.001	-1.5605	0.118644
ENSG00000099810.MTAP	9	21802542	21931646	rs2518713	rs7027989	5.08	0.716	1.5474	0.12177
ENSG00000117791.MARC2	1	220921567	220958150	rs2738756	rs6697965	-5.54	1.546	-1.546	0.1221
ENSG00000204954.C12orf73	12	104343980	104359486	rs7132831	rs1165692	-3.92	1.539	-1.539	0.1238
ENSG00000124357.NAGK	2	71291474	71306935	rs2080643	rs6744843	-4.28	-1.534	1.534	0.12503
ENSG00000160305.DIP2A	21	47878812	47989926	rs2839235	rs11702704	-4.12	-0.656	1.524	0.1275
ENSG00000165416.SUGT1	13	53226844	53275044	rs9536283	rs9526975	-3.68	-0.015	1.5197	0.1286
ENSG00000014824.SLC30A9	4	41992489	42092474	rs6813397	rs7681854	3.68	-1.138	-1.5182	0.129
ENSG00000182512.GLRX5	14	95999840	96011061	rs10135082	rs10484053	-6.81	-2.055	1.5091	0.13128
ENSG00000122507.BBS9	7	33168856	33645680	rs9768604	rs1362368	-3.89	-1.507	1.507	0.132
ENSG00000178965.C1orf173	1	75033795	75139422	rs11210485	rs730645	-4.31	-1.338	1.506	0.13207
ENSG00000128595.CALU	7	128379346	128411861	rs10488628	rs1006023	-6.4	-1.195	1.49755	0.134
ENSG00000242114.MTFP1	22	30821518	30825045	rs3804078	rs4820834	3.66	-1.496	-1.496	0.135
ENSG00000114956.DGUOK	2	74153953	74186088	rs6745776	rs831525	3.49	1.53	1.4936	0.135283
ENSG00000135778.NTPCR	1	233086351	233119628	rs2224402	rs12744791	-9.78	1.489	-1.489	0.13649
ENSG00000136100.VPS36	13	52986737	53024763	rs4884452	rs1056335	-3.61	1.044	-1.488	0.1368
ENSG00000080802.CNOT4	7	135046547	135194875	rs292689	rs6961391	3.71	-0.772	-1.47835	0.139
ENSG00000080819.CPOX	3	98239976	98312567	rs9283596	rs1131857	-7.64	1.477	-1.477	0.139676
ENSG00000135596.MICAL1	6	109765265	109787171	rs13437492	rs1476386	4.92	1.24	1.4668	0.14244
ENSG00000254505.CHMP4A	14	24678789	24683075	rs10583	rs2295322	3.78	1.466	1.466	0.14265
ENSG00000072952.MRVI1	11	10594638	10715535	rs4910149	rs11042916	-5.65	-1.464	1.464	0.143194
ENSG00000239672.NME1	17	49230897	49239789	rs41524846	rs16949649	6.96	1.453	1.453	0.14622
ENSG00000114544.SLC41A3	3	125725198	125820404	rs905455	rs9840118	4.54	-1.451	-1.451	0.14678
ENSG00000122971.ACADS	12	121163538	121177811	rs541619	rs2014355	-9.05	-1.19	1.4505	0.14692
ENSG00000197894.ADH5	4	99992132	100009952	rs16996598	rs6827292	-5.78	-0.713	1.4455	0.148
ENSG00000005421.PON1	7	94926988	95025673	rs2299263	rs757158	3.6	-2.334	-1.44757	0.148
ENSG00000103356.EARS2	16	23533335	23569052	rs120963	rs488131	-8.61	1.192	-1.4445	0.149
ENSG00000117480.FAAH	1	46859937	46879520	rs324418	rs1535737	6.16	-1.217	-1.4413	0.14951
ENSG00000149084.HSD17B12	11	43577986	43878167	rs12576917	rs11037579	6.94	1.145	1.4366	0.150819
ENSG00000035687.ADSS	1	244571796	244615436	rs12068598	rs1601269	3.71	-1.437	-1.4331	0.15182
ENSG00000142583.SLC2A5	1	9095166	9148537	rs3737669	rs12116944	3.88	0.233	1.4293	0.15291
ENSG00000133606.MKRN1	7	140152840	140179369	rs4637729	rs12155423	-4.83	-1.425	1.425	0.154
ENSG00000183048.SLC25A10	17	79670404	79688042	rs9319620	rs12452251	4.69	1.424	1.424	0.15445
ENSG00000177951.BET1L	11	167784	207428	rs4758635	rs2272563	3.46	0.87	1.4226	0.154853
ENSG00000214960.ISPD	7	16130817	16460947	rs6461247	rs11760717	-3.95	-0.971	1.41753	0.156
ENSG00000157326.DHRS4	14	24422795	24438488	rs10147475	rs8022613	-5.11	-0.871	1.4171	0.15645
ENSG00000117868.ESYT2	7	158523686	158622944	rs9638144	rs6969349	-4.27	0.655	-1.41691	0.157
ENSG00000114354.TFG	3	100428205	100467810	rs905604	rs6775161	4.07	1.408	1.408	0.159131
ENSG00000124406.ATP8A1	4	42410390	42659122	rs3214048	rs2061526	-5.29	-1.404	1.404	0.16
ENSG00000171793.CTPS1	1	41445007	41478235	rs4132440	rs4453027	-4.34	-0.9914	1.4048	0.16008
ENSG00000139428.MMAB	12	109991542	110011679	rs10161126	rs11610558	-9.75	-1.671	1.4026	0.16072
ENSG00000132205.EMILIN2	18	2847028	2915991	rs3745013	rs11664521	-3.6	1.402	-1.402	0.16092
ENSG00000120265.PCMT1	6	150070579	150132556	rs10872646	rs9689269	-9.36	1.442	-1.3996	0.16163
ENSG00000168275.COA6	1	234509202	234519795	rs2991951	rs6669190	5.25	-1.212	-1.3947	0.1631
ENSG00000174953.DHX36	3	153990335	154042286	rs95506	rs355752	3.91	-1.212	-1.3917	0.164019
ENSG00000224389.C4B	6	31982539	32003195	rs4151657	rs12198173	3.21	0.934	1.3905	0.16438
ENSG00000136003.ISCU	12	108956358	108963160	rs11113910	rs7969198	3.79	-1.384	-1.384	0.16636
ENSG00000159685.CHCHD6	3	126423063	126679249	rs3749395	rs4624521	-4.21	-1.687	1.3826	0.166783
ENSG00000170266.GLB1	3	33038100	33138722	rs7620019	rs11129545	-4.84	-1.484	1.3736	0.169572
ENSG00000175287.PHYHD1	9	131683174	131704320	rs2287363	rs10113912	-8.26	-1.417	1.3663	0.17184
ENSG00000103932.RPAP1	15	41809374	41836467	rs12440045	rs11858969	-3.83	0.904	-1.366	0.17188
ENSG00000122085.MTERFD2	2	242011584	242041747	rs13411510	rs2108485	-5.48	1.363	-1.363	0.172883
ENSG00000174928.C3orf33	3	155480401	155524140	rs6809229	rs358730	-8.15	-1.53	1.3624	0.173077
ENSG00000148175.STOM	9	124101355	124132531	rs306794	rs12340264	2.6	0.451	-1.3619	0.17322
ENSG00000115840.SLC25A12	2	172640880	172864766	rs17614941	rs6738445	4.36	1.484	1.3584	0.17434
ENSG00000240771.ARHGEF25	12	58003963	58013162	rs11172254	rs1545783	3.61	-1.172	-1.3583	0.17438
ENSG00000218739.CEBPZ-AS1	2	37423631	37443336	rs1060957	rs2110965	-3.43	1.357	-1.357	0.174781
ENSG00000167987.VPS37C	11	60897728	60929089	rs507550	rs557309	3.81	-1.355	-1.3553	0.175338
ENSG00000131373.HACL1	3	15602211	15643338	rs17041442	rs4685252	3.87	-0.066	1.3479	0.177702
ENSG00000178922.HYI	1	43916824	43919660	rs3768048	rs6954	4.59	-0.985	-1.3467	0.17807
ENSG00000027001.MIPEP	13	24304328	24463558	rs7325694	rs11551114	-5.76	1.346	-1.346	0.1783
ENSG00000065000.AP3D1	19	2100988	2164464	rs2238609	rs11671391	-3.32	-1.345	1.345	0.17863
ENSG00000087157.PGS1	17	76374721	76421195	rs12942703	rs2090205	4.48	2.224	1.345	0.17874
ENSG00000173221.GLRX	5	95087023	95158709	rs147295	rs11738579	-4.69	-2.22	1.3434	0.1792
ENSG00000136830.FAM129B	9	130267618	130341268	rs10819295	rs12341585	-3.39	-0.502	-1.3427	0.17936
ENSG00000165912.PACSIN3	11	47199076	47207994	rs326217	rs1352307	3.93	-1.341	-1.341	0.17992
ENSG00000025039.RRAGD	6	90074355	90121989	rs2224727	rs6454756	3.66	1.24	1.3343	0.18211
ENSG00000176715.ACSF3	16	89154783	89222254	rs7198060	rs1054747	-5.43	1.214	-1.3316	0.183
ENSG00000105341.ATP5SL	19	41937223	41946622	rs2241715	rs17318596	3.48	1.214	1.329	0.18385
ENSG00000100577.GSTZ1	14	77787227	77797940	rs8012228	rs8015231	4.2	0.043	-1.3212	0.18644
ENSG00000110871.COQ5	12	120941077	120972237	rs7973823	rs651627	5.02	-1.321	-1.321	0.1865
ENSG00000198168.SVIP	11	22835345	22851845	rs2470332	rs2041466	4.17	-1.879	-1.3205	0.186671
ENSG00000083099.LYRM2	6	90277863	90348472	rs9344943	rs34012596	-8.05	-1.013	1.318	0.18749
ENSG00000172992.DCAKD	17	43100708	43138473	rs7224944	rs2157839	-4.17	1.389	-1.317	0.18797
ENSG00000122490.PQLC1	18	77662420	77711664	rs2298643	rs3744870	3.77	-1.314	-1.314	0.18885
ENSG00000015475.BID	22	18216906	18257536	rs2587113	rs2535694	-3.37	1.001	1.3074	0.191
ENSG00000161647.MPP3	17	41878167	41910538	rs1731906	rs8081646	-3.72	-0.702	1.303	0.19247
ENSG00000186479.RGS7BP	5	63802084	63908139	rs4404633	rs3797050	-3.01	1.525	-1.3015	0.1931
ENSG00000255071.SAA2-SAA4	11	18252970	18270182	rs2468802	rs4150575	3.47	-0.93	-1.2942	0.195582
ENSG00000074582.BCS1L	2	219523487	219528166	rs12989189	rs1863703	-3.38	1.294	-1.294	0.195665
ENSG00000121797.CCRL2	3	46448654	46454488	rs11130092	rs4513489	-4.52	0.03	-1.2931	0.195993
ENSG00000135862.LAMC1	1	182992595	183114727	rs647347	rs12034436	4.44	1.293	1.293	0.19601
ENSG00000214063.TSPAN4	11	842808	867116	rs3895063	rs6597977	4.04	-0.719	1.2921	0.196332
ENSG00000133805.AMPD3	11	10329860	10529126	rs4910149	rs4910143	-5.59	-1.292	1.2896	0.197192
ENSG00000165475.CRYL1	13	20977806	21099996	rs9552162	rs9552195	-5.18	-1.39	1.2865	0.1983
ENSG00000187676.B3GALTL	13	31774073	31906413	rs1555726	rs9805284	-6.77	1.468	-1.286	0.1984
ENSG00000168374.ARF4	3	57557090	57583947	rs11707555	rs9837192	3.12	-1.519	-1.2853	0.198693
ENSG00000109016.DHRS7B	17	21026677	21096578	rs4985969	rs3744226	3.41	0.934	1.284	0.19906
ENSG00000115145.STAM2	2	152973315	153032506	rs17326195	rs10803946	-4.29	1.284	-1.284	0.199142
ENSG00000146476.C6orf211	6	151773422	151791236	rs6900089	rs11550103	-5.79	0.589	-1.2758	0.20202
ENSG00000122729.ACO1	9	32384618	32454767	rs10738886	rs7042042	-5.41	1.083	-1.274	0.20266
ENSG00000145354.CISD2	4	103790135	103810399	rs3774997	rs223313	-4.26	-1.274	1.274	0.203
ENSG00000153531.ADPRHL1	13	114076260	114107839	rs9549785	rs8001806	3.71	1.271	1.271	0.2037
ENSG00000144152.FBLN7	2	112895962	112945791	rs12474447	rs7600843	-3.7	1.588	-1.2678	0.204858
ENSG00000120437.ACAT2	6	160181360	160200144	rs12204454	rs2842972	3.2	-0.245	-1.2618	0.20703
ENSG00000165478.HEPACAM	11	124789089	124806308	rs1783885	rs7941040	-3.79	-1.545	1.251	0.210944
ENSG00000105255.FSD1	19	4304597	4323840	rs10419363	rs11085068	3.39	-0.65	-1.2509	0.21096
ENSG00000166411.IDH3A	15	78423840	78464291	rs11072745	rs11631100	6.72	1.245	1.245	0.21313
ENSG00000042445.RETSAT	2	85569211	85581743	rs6753357	rs3923229	-3.87	1.251	-1.2446	0.213289
ENSG00000170430.MGMT	10	131265448	131566271	rs4750772	rs2308321	7.21	-0.113	-1.2443	0.21338
ENSG00000129219.PLD2	17	4710391	4726729	rs4790230	rs3764897	4.8	1.084	1.244	0.21356
ENSG00000134121.CHL1	3	238279	451090	rs330900	rs331885	3.59	-0.271	1.2433	0.21375
ENSG00000162390.ACOT11	1	55007930	55104865	rs299872	rs1368883	7.09	-1.243	-1.243	0.21387
ENSG00000157379.DHRS1	14	24759804	24769039	rs6573766	rs10134537	-6.71	0.906	-1.2408	0.21467
ENSG00000162482.AKR7A3	1	19609052	19615744	rs3828102	rs9729157	-5.4	1.195	-1.2372	0.21601
ENSG00000140263.SORD	15	45315302	45369383	rs2437866	rs8026278	-4.78	1.679	-1.233	0.2174
ENSG00000177963.RIC8A	11	207511	215113	rs4758635	rs4980329	4.34	0.367	1.2332	0.217498
ENSG00000165140.FBP1	9	97365415	97402531	rs2993961	rs10761350	3.74	-1.247	-1.2318	0.21802
ENSG00000118939.UCHL3	13	76123619	76180085	rs9600526	rs9635000	7.04	-1.231	-1.231	0.2183
ENSG00000161618.ALDH16A1	19	49956426	49974305	rs1578944	rs7258719	7.31	-1.23	-1.23	0.2187
ENSG00000168827.GFM1	3	158362067	158410364	rs4264773	rs1630524	3.31	-0.347	1.2291	0.219047
ENSG00000163431.LMOD1	1	201865580	201915715	rs12090635	rs4494199	4.72	0.882	1.2279	0.21949
ENSG00000153982.GDPD1	17	57297828	57353328	rs7212846	rs2333465	3.38	-0.634	-1.226	0.22025
ENSG00000132613.MTSS1L	16	70695107	70719969	rs3785422	rs11647479	-4.11	1.223	-1.223	0.221
ENSG00000117593.DARS2	1	173793641	173827684	rs5878	rs2144708	-8.54	-1.235	1.2218	0.22179
ENSG00000110801.PSMD9	12	122326637	122356203	rs7961894	rs1169081	-5.87	-1.221	1.221	0.22209
ENSG00000123453.SARDH	9	136528682	136605077	rs9409864	rs2510245	4.4	1.388	1.2129	0.22518
ENSG00000181873.IBA57	1	228353516	228369958	rs12564763	rs4653917	-5.77	-0.862	1.21	0.22626
ENSG00000169972.PUSL1	1	1243947	1247057	rs12036216	rs2649589	-3.86	-1.207	1.207	0.22743
ENSG00000066248.NGEF	2	233743396	233877982	rs10165217	rs1083522	3.5	-1.189	-1.2041	0.22856
ENSG00000072042.RDH11	14	68143518	68162531	rs11158687	rs11628035	-4.26	-1.201	1.201	0.22975
ENSG00000166192.SENP8	15	72406599	72433311	rs7182776	rs7182776	-4.58	-1.201	1.201	0.22975
ENSG00000198729.PPP1R14C	6	150464212	150571493	rs9384331	rs9397821	-4.83	1.201	-1.201	0.22975
ENSG00000110628.SLC22A18	11	2920951	2946476	rs11606985	rs2078786	3.48	-1.201	-1.201	0.229751
ENSG00000163558.PRKCI	3	169940153	170023769	rs3849448	rs2140825	3.77	1.197	1.197	0.231307
ENSG00000135318.NT5E	6	86159809	86205500	rs17440806	rs6942065	6.52	1.197	1.197	0.23131
ENSG00000196236.XPNPEP3	22	41253081	41363838	rs4821981	rs138342	-3.58	-0.76	1.1915	0.233
ENSG00000143156.NME7	1	169101769	169337205	rs17518147	rs4656664	-5.84	-1.191	1.191	0.23365
ENSG00000148484.RSU1	10	16632610	16859527	rs10904833	rs2603795	3.32	0.118	1.1895	0.23423
ENSG00000175183.CSRP2	12	77252495	77272840	rs17813975	rs10862707	3.83	0.922	1.1829	0.23684
ENSG00000163956.LRPAP1	4	3508103	3534286	rs16844569	rs762870	5.44	-1.047	-1.1796	0.238
ENSG00000163346.PBXIP1	1	154916552	154928599	rs11264302	rs4845396	-3.52	0.351	-1.1763	0.23948
ENSG00000066557.LRRC40	1	70610488	70671303	rs12033206	rs632047	-4.4	1.176	-1.176	0.23959
ENSG00000172803.SNX32	11	65601112	65624367	rs606978	rs2231884	7.71	0.929	1.1754	0.239829
ENSG00000158417.EIF5B	2	99953816	100017789	rs12623620	rs2305354	4.85	1.175	1.175	0.239995
ENSG00000160307.S100B	21	48018875	48025121	rs9978658	rs2070429	-5.43	1.012	-1.175	0.24
ENSG00000063761.ADCK1	14	78266426	78401355	rs6574416	rs741574	-5.95	-1.311	1.1713	0.24148
ENSG00000150867.PIP4K2A	10	22823778	23003484	rs16922592	rs12355895	-8.13	0.884	-1.1699	0.24204
ENSG00000007516.BAIAP3	16	1383602	1399439	rs1132356	rs2235632	6.07	-0.652	-1.1676	0.243
ENSG00000137996.RTCA	1	100731763	100758325	rs12060945	rs6577165	3.19	0.842	1.1646	0.24419
ENSG00000182667.NTM	11	131240373	132206716	rs1939380	rs3099779	-3.51	-1.029	1.1602	0.245959
ENSG00000156219.ART3	4	76932337	77033955	rs11946079	rs9995300	5.82	0.433	1.158	0.247
ENSG00000170448.NFXL1	4	47849257	47916653	rs1984713	rs6823698	-3.53	-1.093	1.1584	0.247
ENSG00000167414.GNG8	19	47137333	47137942	rs7253955	rs3760759	-3.77	-1.157	1.157	0.24727
ENSG00000144741.SLC25A26	3	66119285	66438540	rs28758977	rs1680402	5.18	0.882	1.1562	0.247601
ENSG00000167676.PLIN4	19	4502204	4517716	rs2288932	rs892161	3.39	0.332	-1.1548	0.24817
ENSG00000176148.TCP11L1	11	33060963	33127489	rs3802790	rs3758741	4.06	-1.152	-1.152	0.249321
ENSG00000106049.HIBADH	7	27565061	27702614	rs952255	rs10951169	5.62	0.343	1.1515	0.25
ENSG00000134330.IAH1	2	9613787	9636672	rs10929588	rs3811594	-3.64	0.289	-1.1482	0.250867
ENSG00000112659.CUL9	6	43149913	43192325	rs2756173	rs2273709	-3.71	-1.146	1.146	0.2518
ENSG00000089041.P2RX7	12	121570622	121623876	rs208305	rs3751143	-7.35	-0.961	1.1458	0.25189
ENSG00000111275.ALDH2	12	112204691	112247782	rs12580246	rs16941724	-5.82	-1.459	1.1434	0.25289
ENSG00000143776.CDC42BPA	1	227177566	227506175	rs2802268	rs4601553	3.95	-0.283	1.137	0.25554
ENSG00000060982.BCAT1	12	24964295	25102393	rs976436	rs2353483	-4.83	-2.168	1.1368	0.2556
ENSG00000159231.CBR3	21	37507210	37518864	rs12627688	rs879894	-9.76	1.17	-1.136	0.2559
ENSG00000013288.MAN2B2	4	6576902	6625089	rs4689486	rs2301792	5.44	-0.936	1.1342	0.257
ENSG00000185942.NKAIN3	8	63161150	63912211	rs1350059	rs10100456	-4.24	1.133	-1.133	0.257
ENSG00000232859.LYRM9	17	26205340	26221778	rs11654191	rs3751972	-7.25	-1.014	1.133	0.25742
ENSG00000140575.IQGAP1	15	90931450	91045475	rs7182610	rs3902286	-3.69	0.188	-1.131	0.25785
ENSG00000011376.LARS2	3	45429998	45590913	rs4683131	rs12638088	-9.34	1.126	-1.126	0.260166
ENSG00000146242.TPBG	6	83072923	83080545	rs497198	rs62953	-3.74	0.819	-1.1257	0.26029
ENSG00000170310.STX8	17	9153788	9479908	rs7214739	rs7215971	-3.62	0.978	-1.123	0.26154
ENSG00000134905.CARS2	13	111293759	111365950	rs9559849	rs9670064	-7.79	-0.145	1.1213	0.2621
ENSG00000132330.SCLY	2	238969530	239008054	rs6746771	rs1128552	9	-1.437	-1.1188	0.263237
ENSG00000262633.RP11-156P1.2	17	45000499	45124520	rs16941168	rs10514915	3.29	-0.648	-1.118	0.26367
ENSG00000106077.ABHD11	7	73150424	73153197	rs17401675	rs6460052	8.14	0.776	1.11553	0.265
ENSG00000110108.TMEM109	11	60681346	60690915	rs11230556	rs489172	-3.97	0.689	1.1131	0.265648
ENSG00000183597.TANGO2	22	20004537	20053449	rs3757	rs2531706	4.61	-1.106	-1.106	0.269
ENSG00000132589.FLOT2	17	27206353	27224697	rs4349196	rs6505095	-7.18	-1.043	1.104	0.26942
ENSG00000171903.CYP4F11	19	16023177	16045677	rs7257306	rs3093089	4.76	0.776	1.1032	0.26993
ENSG00000116874.WARS2	1	119573839	119683294	rs1557102	rs2645303	-3.47	-0.783	1.1012	0.27083
ENSG00000103154.NECAB2	16	84002237	84036381	rs4782873	rs8047833	-4.65	-0.991	1.1008	0.271
ENSG00000105793.GTPBP10	7	89964537	90020769	rs177667	rs42664	8.11	1.176	1.09962	0.271
ENSG00000143653.SCCPDH	1	246887349	246931439	rs6669532	rs10924826	-4.42	-0.753	1.1006	0.27108
ENSG00000164978.NUDT2	9	34329504	34343709	rs17258783	rs4879775	6.61	-0.754	1.0976	0.2724
ENSG00000088682.COQ9	16	57481337	57495187	rs9925562	rs223881	4.61	-1.314	-1.0948	0.274
ENSG00000106460.TMEM106B	7	12250867	12282993	rs16877301	rs5011432	-6.47	1.741	-1.09359	0.274
ENSG00000165434.PGM2L1	11	74041363	74109518	rs17132911	rs10898973	4.45	-1.09	-1.09	0.275713
ENSG00000186153.WWOX	16	78133310	79246564	rs8047442	rs7184686	4.94	0.388	1.0886	0.276
ENSG00000163453.IGFBP7	4	57896939	57976551	rs7677987	rs1718858	-5.3	1.342	-1.0885	0.276
ENSG00000186205.MARC1	1	220960101	220987735	rs2784252	rs2642442	-5.86	0.753	-1.0878	0.2767
ENSG00000134369.NAV1	1	201592411	201796102	rs862922	rs1022361	4.5	1.085	1.085	0.27792
ENSG00000198010.DLGAP2	8	1449532	1656642	rs4327894	rs2956914	-5.06	1.085	-1.085	0.278
ENSG00000124608.AARS2	6	44267391	44281063	rs2297334	rs9688508	-4.99	1.398	-1.0839	0.2784
ENSG00000160877.NACC1	19	13228917	13251955	rs2419233	rs1003392	-3.27	-0.75	1.0832	0.27874
ENSG00000173821.RNF213	17	78234665	78372586	rs12939929	rs8068613	-2.95	-0.607	1.082	0.27906
ENSG00000106665.CLIP2	7	73703805	73820273	rs37613	rs10949838	-4.5	-1.082	1.07786	0.281
ENSG00000070610.GBA2	9	35736863	35749983	rs2145925	rs10814274	-8.42	1.078	-1.078	0.28103
ENSG00000161513.FDXR	17	72858619	72869156	rs11649883	rs521002	-8.4	1.077	-1.077	0.28148
ENSG00000010282.HHATL	3	42734155	42744319	rs11929390	rs339682	5.46	-0.883	-1.0769	0.281539
ENSG00000107566.ERLIN1	10	101909851	101948091	rs11190396	rs11597086	-7.09	-1.499	1.0761	0.28189
ENSG00000141295.SCRN2	17	45915058	45918699	rs11079797	rs2325752	6.12	-1.019	-1.073	0.28306
ENSG00000104823.ECH1	19	39306062	39322645	rs11575003	rs2229259	-6.66	1.072	-1.072	0.28372
ENSG00000214078.CPNE1	20	34213953	34252878	rs2425067	rs11696527	-9.42	1.219	-1.0718	0.28383
ENSG00000125375.ATP5S	14	50779044	50802276	rs743076	rs2275592	-6.4	1.252	-1.0666	0.28614
ENSG00000173064.HECTD4	12	112597992	112819896	rs7979255	rs2301756	-3.72	-1.544	1.0622	0.28816
ENSG00000132423.COQ3	6	99817276	99842080	rs3811072	rs9399170	-6.08	0.667	-1.062	0.28824
ENSG00000174705.SH3PXD2B	5	171752185	171881527	rs11747598	rs9313596	-3.53	-1.315	1.0619	0.2883
ENSG00000116957.TBCE	1	235530675	235612283	rs6429082	rs4659838	4.41	-1.455	-1.0523	0.29268
ENSG00000184922.FMNL1	17	43298811	43324687	rs12449792	rs11657325	3.64	1.114	1.052	0.29293
ENSG00000115902.SLC1A4	2	65215611	65250999	rs2723090	rs6754629	5.1	-1.058	-1.0511	0.293218
ENSG00000125651.GTF2F1	19	6379580	6393992	rs7540	rs348362	4.23	1.05	1.05	0.29372
ENSG00000076924.XAB2	19	7684411	7694451	rs11672993	rs612862	3.83	1.924	1.0482	0.29455
ENSG00000165118.C9orf64	9	86553226	86571901	rs7853235	rs1572030	-4.59	1.669	-1.0448	0.29612
ENSG00000147457.CHMP7	8	23101150	23119512	rs4242394	rs7463256	4.62	0.54	1.0439	0.297
ENSG00000106771.TMEM245	9	111777432	111882225	rs1533642	rs1467242	4.2	-1.041	-1.041	0.29788
ENSG00000149541.B3GAT3	11	62382768	62389647	rs4489748	rs2516633	-5	-1.04	1.04	0.29834
ENSG00000166228.PCBD1	10	72642037	72648541	rs10999621	rs10762410	-5.42	-0.693	1.0373	0.29957
ENSG00000110514.MADD	11	47290712	47351582	rs11606287	rs3736101	6.59	-0.875	-1.036	0.300212
ENSG00000128641.MYO1B	2	192109911	192290115	rs16833762	rs6728759	-3.51	0.522	-1.0312	0.30243
ENSG00000157601.MX1	21	42792231	42831141	rs2838052	rs6517666	-5.36	-0.31	-1.03	0.303
ENSG00000163110.PDLIM5	4	95373037	95589377	rs17021818	rs2452597	-4.43	-1.027	1.027	0.304
ENSG00000130193.THEM6	8	143808621	143818345	rs3758083	rs3758083	3.66	1.434	1.0272	0.304
ENSG00000177000.MTHFR	1	11845780	11866977	rs198358	rs1801133	-5.05	0.389	-1.0226	0.30649
ENSG00000124615.MOCS1	6	39867354	39902290	rs2475810	rs3003942	3.9	1.022	1.022	0.30678
ENSG00000143353.LYPLAL1	1	219347186	219386207	rs17049199	rs7539768	7.15	0.689	1.0189	0.30824
ENSG00000137845.ADAM10	15	58887403	59042177	rs12592017	rs1427281	-3.61	-1.016	1.016	0.30963
ENSG00000164366.CCDC127	5	196986	218330	rs4956994	rs9763161	5.49	-0.637	-1.0136	0.3108
ENSG00000161281.COX7A1	19	36641824	36643771	rs2301736	rs4805162	-4.21	0.922	-1.0112	0.3119
ENSG00000170248.PDCD6IP	3	33839844	33911194	rs7613581	rs9853874	-3.73	1.011	-1.011	0.312016
ENSG00000139641.ESYT1	12	56512034	56538455	rs705708	rs17118403	3.34	0.096	1.011	0.31203
ENSG00000137806.NDUFAF1	15	41679551	41694717	rs12440045	rs7168431	-4.96	-0.232	1.01	0.31257
ENSG00000111907.TPD52L1	6	125440195	125585553	rs1547786	rs3799721	-5.72	-0.364	1.0097	0.31264
ENSG00000122778.KIAA1549	7	138516126	138666064	rs878992	rs2774965	4.62	-1.009	-1.009	0.313
ENSG00000136267.DGKB	7	14184674	15014402	rs6949675	rs6461139	-3.99	-0.831	1.00911	0.313
ENSG00000099810.MTAP	9	21802542	21931646	rs2518713	rs7027989	7.42	0.716	1.0088	0.31308
ENSG00000160124.CCDC58	3	122078438	122102078	rs17201246	rs2202127	5.06	-1.702	-1.0026	0.316032
ENSG00000013375.PGM3	6	83870869	83903655	rs474075	rs473267	-6.74	-1.002	1.002	0.31634
ENSG00000055147.FAM114A2	5	153369688	153418496	rs2560030	rs378267	-5.82	0.593	-0.9997	0.3175
ENSG00000142634.EFHD2	1	15736391	15756839	rs6675825	rs12562216	-3.91	0.995	-0.995	0.31974
ENSG00000179399.GPC5	13	92050929	93519490	rs9516113	rs7983063	4.46	0.845	0.9927	0.3209
ENSG00000154229.PRKCA	17	64298754	64806861	rs8074995	rs9895770	5.05	-1.224	-0.989	0.32243
ENSG00000152620.NADK2	5	36192694	36242381	rs33678	rs12656216	-4.34	-0.983	0.983	0.3256
ENSG00000178096.BOLA1	1	149859440	149872351	rs3106121	rs1376676	8.6	-1.065	-0.9795	0.32732
ENSG00000134121.CHL1	3	238279	451090	rs330900	rs3956142	4.42	-0.263	0.9786	0.327767
ENSG00000041353.RAB27B	18	52385091	52562747	rs4800977	rs12956208	-4.15	1.187	-0.977	0.3287
ENSG00000164111.ANXA5	4	122589110	122618268	rs4833230	rs17450274	-8.19	-0.975	0.975	0.33
ENSG00000171729.TMEM51	1	15479028	15546976	rs10927751	rs12145963	-4	0.129	-0.974	0.33006
ENSG00000176853.FAM91A1	8	124780696	124827692	rs1367828	rs7015861	5.9	0.972	0.972	0.331
ENSG00000153291.SLC25A27	6	46620678	46645930	rs3799873	rs2277119	3.83	-0.933	-0.9685	0.33277
ENSG00000108592.FTSJ3	17	61896793	61907372	rs2955245	rs7210724	-4.54	-0.623	0.968	0.33289
ENSG00000166140.ZFYVE19	15	41099284	41106767	rs11558807	rs10152371	-3.7	-0.443	0.967	0.33333
ENSG00000144647.POMGNT2	3	43120724	43147568	rs10510735	rs493412	5.23	-0.965	-0.965	0.334545
ENSG00000015676.NUDCD3	7	44418720	44530479	rs35705461	rs306995	5.7	0.964	0.96341	0.335
ENSG00000132109.TRIM21	11	4406127	4414926	rs926100	rs11032347	-2.88	-0.296	-0.9641	0.335011
ENSG00000233276.GPX1	3	49394609	49396033	rs11920251	rs17080528	-9.4	0.963	-0.963	0.335548
ENSG00000185477.GPRIN3	4	90157537	90229161	rs1560488	rs12640416	3.6	1.363	0.963	0.336
ENSG00000104381.GDAP1	8	75233365	75401107	rs3780014	rs16938888	4.51	-0.962	-0.962	0.336
ENSG00000106477.CEP41	7	130033612	130082274	rs12672246	rs1990790	4.8	0.874	0.96085	0.337
ENSG00000092931.MFSD11	17	74731947	74777531	rs2429452	rs563079	-3.87	0.802	0.96	0.33706
ENSG00000162688.AGL	1	100315640	100389579	rs6663234	rs903125	-8.71	-1.375	0.9558	0.33919
ENSG00000170445.HARS	5	140052758	140071609	rs2569163	rs2878996	-3.47	1.832	-0.9546	0.3398
ENSG00000117448.AKR1A1	1	46016215	46035721	rs781059	rs12042481	-5.22	-1.129	-0.9503	0.34198
ENSG00000132589.FLOT2	17	27206353	27224697	rs4349196	rs6505095	-5.05	-1.043	0.948	0.34288
ENSG00000213614.HEXA	15	72635775	72668817	rs4556749	rs11633028	-3.09	0.289	-0.946	0.34407
ENSG00000134077.THUMPD3	3	9404526	9428475	rs2279440	rs2596937	-3.72	-2.431	0.9449	0.344686
ENSG00000152583.SPARCL1	4	88394487	88452213	rs10024099	rs13051	-5.78	1.153	-0.944	0.345
ENSG00000020922.MRE11A	11	94152895	94227074	rs521349	rs535801	5.03	-0.944	-0.944	0.34517
ENSG00000130707.ASS1	9	133320316	133376661	rs17147029	rs11243372	4.14	-0.201	0.9424	0.34598
ENSG00000091039.OSBPL8	12	76745577	76953589	rs12426026	rs4761429	-3.86	0.942	-0.942	0.34619
ENSG00000151611.MMAA	4	146539415	146581187	rs10003327	rs17020467	-7.46	0.586	-0.9398	0.347
ENSG00000121897.LIAS	4	39460620	39479273	rs13144464	rs17510142	-3.88	-0.576	0.9384	0.348
ENSG00000029534.ANK1	8	41510739	41754280	rs2241895	rs7825337	-3.56	-1.126	0.936	0.349
ENSG00000144535.DIS3L2	2	232825955	233209060	rs2679163	rs13416596	4.88	-0.63	-0.9345	0.350025
ENSG00000171608.PIK3CD	1	9711790	9789172	rs4074744	rs9430636	4.04	0.846	0.9339	0.35036
ENSG00000130956.HABP4	9	99212483	99253618	rs12002084	rs7871404	2.86	-1.638	-0.9327	0.351
ENSG00000172939.OXSR1	3	38206580	38296979	rs6778005	rs7744	-5.33	-0.567	0.9323	0.351172
ENSG00000198959.TGM2	20	36756863	36794980	rs6063998	rs6014227	4.69	0.932	0.932	0.35134
ENSG00000242028.HYPK	15	44088340	44095241	rs8040336	rs678513	-3.48	0.773	-0.931	0.3518
ENSG00000189171.S100A13	1	153591263	153606568	rs28416529	rs9330298	8.72	1.092	0.9294	0.35269
ENSG00000081138.CDH7	18	63417488	63548638	rs2541868	rs17783381	3.57	-0.926	-0.926	0.35445
ENSG00000215251.FASTKD5	20	3127165	3140543	rs2295547	rs16988305	-6.65	0.404	-0.9255	0.35473
ENSG00000124523.SIRT5	6	13574816	13614790	rs204221	rs9382221	3.92	-0.427	-0.9248	0.35509
ENSG00000185745.IFIT1	10	91152303	91163745	rs6586196	rs7916812	3.57	1.17	0.9231	0.35595
ENSG00000103811.CTSH	15	79213400	79241916	rs12438433	rs12148472	-4.92	-0.921	0.921	0.35705
ENSG00000140598.EFTUD1	15	82422571	82555104	rs8027661	rs1503068	-4.8	0.918	-0.918	0.35862
ENSG00000103222.ABCC1	16	16043434	16236931	rs10852377	rs246230	-4.93	-0.917	0.917	0.359
ENSG00000144867.SRPRB	3	133502877	133544616	rs12492380	rs9881405	-4.97	-0.917	0.917	0.359143
ENSG00000107020.PLGRKT	9	5357973	5437878	rs10815236	rs10975098	-3.93	1.75	-0.9147	0.36034
ENSG00000118596.SLC16A7	12	59989848	60176395	rs7976956	rs2711668	-3.6	0.914	-0.914	0.36072
ENSG00000154265.ABCA5	17	67240452	67323385	rs11655507	rs4310935	5.47	1.156	0.912	0.36151
ENSG00000095261.PSMD5	9	123577774	123605262	rs36078109	rs4837796	6.31	0.911	0.911	0.3623
ENSG00000185838.GNB1L	22	19770747	19842462	rs7293017	rs2269726	4.94	-0.827	-0.9095	0.363
ENSG00000104427.ZC2HC1A	8	79578282	79632000	rs16919538	rs1872072	4.74	0.838	0.9093	0.363
ENSG00000134759.ELP2	18	33709407	33757909	rs12457209	rs948419	-4.17	0.909	-0.909	0.36335
ENSG00000167468.GPX4	19	1103936	1106787	rs7247087	rs4807542	5.29	1.265	0.9055	0.36521
ENSG00000156958.GALK2	15	49447853	49660066	rs17435932	rs17396612	3.91	0.904	0.904	0.366
ENSG00000137824.RMDN3	15	41028082	41048049	rs11558807	rs11070292	-6.62	-0.877	0.902	0.36715
ENSG00000085117.CD82	11	44585977	44641913	rs782404	rs7935166	5.39	-0.901	-0.901	0.367588
ENSG00000119125.GDA	9	74729511	74872109	rs10511997	rs10869155	-4.11	0.34	-0.9005	0.36787
ENSG00000144320.KIAA1715	2	176788620	176867567	rs847151	rs2121391	-4.94	0.486	-0.8974	0.369525
ENSG00000241878.PISD	22	32014477	32058418	rs16989291	rs7286496	5.4	-0.714	-0.8932	0.372
ENSG00000151376.ME3	11	86152150	86383678	rs11234658	rs670736	5.81	-0.862	-0.8922	0.372291
ENSG00000154930.ACSS1	20	24986868	25039616	rs6114995	rs11699487	-4.31	-0.892	0.892	0.37239
ENSG00000160752.FDPS	1	155278539	155290457	rs12748814	rs2297480	-7.84	-0.891	0.891	0.37293
ENSG00000100714.MTHFD1	14	64854749	64926722	rs1950902	rs1076991	-5.29	-0.451	0.8904	0.37323
ENSG00000144199.FAHD2B	2	97749320	97760619	rs10496325	rs10496325	-7.43	-1.088	0.8894	0.373796
ENSG00000038002.AGA	4	178351924	178363657	rs3749480	rs4690522	-4.6	-0.889	0.889	0.374
ENSG00000136279.DBNL	7	44084239	44109055	rs10951757	rs1894752	3.56	1.322	0.88815	0.374
ENSG00000138175.ARL3	10	104433488	104474164	rs2902548	rs10786701	-6.5	-1.122	0.8873	0.3749
ENSG00000103540.CCP110	16	19535133	19564730	rs121235	rs12708624	-5.65	0.847	-0.8844	0.376
ENSG00000107679.PLEKHA1	10	124134212	124191867	rs2421015	rs6585827	3.85	-1.997	-0.8819	0.37781
ENSG00000254685.FPGT	1	74663896	74699770	rs17524893	rs11806946	-7.84	1.814	-0.8804	0.37865
ENSG00000057608.GDI2	10	5807186	5884095	rs7770	rs4748572	-4.63	-0.875	0.875	0.38157
ENSG00000172345.STARD5	15	81601394	81616524	rs7164765	rs4778893	-6.98	-0.945	0.873	0.38258
ENSG00000130489.SCO2	22	50961997	50964868	rs6151429	rs5770871	-7.64	0.53	-0.8695	0.385
ENSG00000023191.RNH1	11	494512	507300	rs7936397	rs11823647	-6.45	0.481	-0.8687	0.385028
ENSG00000170917.NUDT6	4	123809852	123844123	rs13147949	rs12513181	-7.12	0.788	-0.8656	0.387
ENSG00000176422.SPRYD4	12	56862301	56864763	rs11171846	rs7302925	4.46	-0.864	-0.864	0.38759
ENSG00000140522.RLBP1	15	89753100	89764982	rs2283436	rs17228716	7.05	-1.139	-0.862	0.38888
ENSG00000115355.CCDC88A	2	55514978	55647057	rs1598163	rs13019339	4.36	-0.86	-0.86	0.389789
ENSG00000039523.FAM65A	16	67552321	67580691	rs1210978	rs9924509	-2.98	-0.4	0.8543	0.393
ENSG00000171953.ATPAF2	17	17880723	17942523	rs6502629	rs16960870	-2.49	0.971	0.849	0.39578
ENSG00000184922.FMNL1	17	43298811	43324687	rs7224944	rs4792819	4.11	0.846	0.846	0.39755
ENSG00000103257.SLC7A5	16	87863629	87903094	rs6540110	rs7198286	3.14	-0.893	-0.8417	0.4
ENSG00000105397.TYK2	19	10461209	10491352	rs3093030	rs12720356	-5.87	0.822	-0.8348	0.40381
ENSG00000161904.LEMD2	6	33738979	33756913	rs4711348	rs755495	4.45	-0.833	-0.833	0.40484
ENSG00000079819.EPB41L2	6	131160487	131384462	rs2008593	rs3777436	6.12	1.608	0.8305	0.40626
ENSG00000100034.PPM1F	22	22273793	22307209	rs11705283	rs3788333	-7.04	0.329	-0.8289	0.407
ENSG00000148290.SURF1	9	136218610	136223552	rs8176720	rs487820	-6.29	-0.911	0.828	0.40768
ENSG00000105379.ETFB	19	51848423	51869672	rs166653	rs36498	3.57	1.928	0.826	0.40878
ENSG00000253710.ALG11	13	52586534	52603800	rs9526820	rs9535825	-4.36	0.997	-0.8237	0.4101
ENSG00000272896.RP11-216L13.17	9	139685831	139695047	rs4419903	rs11145887	4.89	1.173	0.8203	0.41204
ENSG00000118961.C2orf43	2	20883788	21022882	rs16987880	rs13385191	-7.17	-0.818	0.818	0.413357
ENSG00000141469.SLC14A1	18	43304092	43332485	rs12326162	rs692899	6.22	1.311	0.818	0.41344
ENSG00000170017.ALCAM	3	105085753	105295744	rs10933821	rs3772556	-3.41	-2.21	0.8159	0.414533
ENSG00000103381.CPPED1	16	12756919	12897874	rs7187496	rs8044011	3.38	-0.033	-0.8149	0.415
ENSG00000197226.TBC1D9B	5	179289066	179334859	rs748197	rs30386	-5.31	0.502	-0.8152	0.415
ENSG00000079257.LXN	3	158363611	158390482	rs4264773	rs17699478	5.27	-1.14	-0.815	0.415053
ENSG00000159023.EPB41	1	29213603	29446553	rs12404612	rs150085	-3.88	-0.817	0.8144	0.4154
ENSG00000134184.GSTM1	1	110230436	110251661	rs650985	rs11101992	4.95	0.616	0.8118	0.41691
ENSG00000105499.PLA2G4C	19	48551100	48614074	rs11564538	rs156631	5.13	1.17	-0.8117	0.41695
ENSG00000171497.PPID	4	159630286	159644548	rs7679753	rs17843966	7.99	-1.111	-0.8109	0.417
ENSG00000138363.ATIC	2	216176540	216214487	rs33996776	rs16853834	4.85	-0.512	-0.811	0.417362
ENSG00000105438.KDELR1	19	48885827	48894810	rs275838	rs276709	-3.69	0.928	-0.8091	0.41845
ENSG00000162882.HAAO	2	42994229	43019733	rs6729750	rs12613026	-3.8	-0.558	0.808	0.419078
ENSG00000167720.SRR	17	2206677	2228554	rs2286881	rs17761723	-7.28	0.859	-0.807	0.41938
ENSG00000119431.HDHD3	9	116135699	116139279	rs10817488	rs16936474	-5.96	0.202	-0.8029	0.42205
ENSG00000198561.CTNND1	11	57520715	57587018	rs685149	rs616911	3.64	0.607	0.8005	0.423427
ENSG00000240972.MIF	22	24236191	24237414	rs9624364	rs5751759	-4.09	-0.799	0.799	0.424
ENSG00000143891.GALM	2	38893052	38968379	rs3112142	rs3821023	9.09	0.803	0.7993	0.424099
ENSG00000067057.PFKP	10	3108525	3179904	rs17131865	rs7924157	-3.84	0.381	-0.7981	0.4248
ENSG00000141349.G6PC3	17	42148103	42153709	rs3088347	rs2523166	4.48	0.798	0.798	0.42487
ENSG00000136270.TBRG4	7	45139699	45151646	rs10264280	rs7789805	-5.58	-0.148	0.796	0.426
ENSG00000159377.PSMB4	1	151372010	151374420	rs1752382	rs4603	-7.59	0.795	-0.795	0.42661
ENSG00000128050.PAICS	4	57301907	57327534	rs9684298	rs4305581	-3.59	-0.892	0.7941	0.427
ENSG00000129158.SERGEF	11	17809595	18034709	rs4757574	rs12292915	8.81	-0.609	-0.7922	0.428272
ENSG00000240065.PSMB9	6	32811913	32827362	rs1894407	rs17587	-3.84	0.792	-0.792	0.42836
ENSG00000156239.N6AMT1	21	30244513	30257693	rs2247809	rs7282280	-6.43	-0.532	0.792	0.4286
ENSG00000198931.APRT	16	88875747	88878352	rs3826061	rs1834065	-6.57	-0.4	0.7912	0.429
ENSG00000050393.MCUR1	6	13786789	13814800	rs9396115	rs10223600	3.43	0.933	-0.7893	0.42995
ENSG00000198805.PNP	14	20937113	20945253	rs1760945	rs1713459	-4.23	-0.789	0.789	0.43011
ENSG00000185418.TARSL2	15	102193801	102264807	rs11247320	rs8035839	4.5	-0.574	0.785	0.43245
ENSG00000148842.CNNM2	10	104678050	104849978	rs1163249	rs3740390	5.63	-0.498	-0.7837	0.43322
ENSG00000147813.NAPRT1	8	144656955	144660819	rs4874156	rs10282929	-9.15	-0.192	0.7787	0.436
ENSG00000107951.MTPAP	10	30598730	30663377	rs1781278	rs2015948	-4.46	-1.202	0.7788	0.43611
ENSG00000103966.EHD4	15	42190950	42264776	rs16972584	rs12904722	-3.8	-0.24	0.778	0.43686
ENSG00000141560.FN3KRP	17	80674559	80688204	rs8077655	rs2459703	-8.76	-1.385	0.777	0.43714
ENSG00000152578.GRIA4	11	105480721	105852819	rs2513269	rs680109	-4.5	-0.775	0.775	0.43834
ENSG00000117500.TMED5	1	93615299	93646285	rs2749732	rs12038699	3.47	1.928	0.7748	0.43846
ENSG00000177119.ANO6	12	45609770	45834187	rs6582553	rs10785569	-3.46	-0.052	-0.7744	0.43867
ENSG00000042493.CAPG	2	85621871	85645555	rs7340340	rs3770102	5.63	-0.158	0.7734	0.439309
ENSG00000184047.DIABLO	12	122692210	122712081	rs11057421	rs12870	3.88	1.916	0.773	0.4395
ENSG00000114115.RBP1	3	139236276	139258671	rs9822458	rs12485273	4.19	-1.557	-0.7725	0.439802
ENSG00000106853.PTGR1	9	114312002	114362135	rs7036413	rs2146078	-6.28	-1.233	-0.7722	0.44001
ENSG00000143198.MGST3	1	165600098	165631033	rs10918228	rs7355084	-3.82	-0.327	-0.7674	0.44286
ENSG00000185008.ROBO2	3	75955846	77699115	rs9849387	rs775723	3.22	0.255	-0.7654	0.444043
ENSG00000011105.TSPAN9	12	3186521	3395730	rs10848860	rs3825360	3.22	0.2	-0.7653	0.44408
ENSG00000113441.LNPEP	5	96271098	96373219	rs6884540	rs38040	-4.67	-0.672	0.765	0.4443
ENSG00000167103.PIP5KL1	9	130683158	130693076	rs7865146	rs7862194	-4.34	-0.263	0.7642	0.44474
ENSG00000167969.ECI1	16	2289396	2302301	rs36232	rs3803695	-8.41	0.82	-0.7635	0.445
ENSG00000185532.PRKG1	10	52750945	54058110	rs10437352	rs9415777	5.62	-0.762	-0.762	0.44606
ENSG00000177807.KCNJ10	1	160007257	160040038	rs6670382	rs1186685	3.61	0.217	0.7611	0.44661
ENSG00000076685.NT5C2	10	104845940	104953056	rs1163073	rs11191530	6.02	-0.76	-0.76	0.44725
ENSG00000124275.MTRR	5	7851299	7906138	rs1460968	rs162037	4.08	-0.043	-0.7588	0.448
ENSG00000132481.TRIM47	17	73870242	73874656	rs3744033	rs9894383	-5.38	0.703	-0.756	0.44983
ENSG00000214435.AS3MT	10	104629273	104661656	rs2486758	rs549466	4.64	0.003	0.7554	0.45003
ENSG00000103043.VAC14	16	70721342	70835064	rs3785422	rs936305	-4.58	-0.42	0.7524	0.452
ENSG00000184076.UQCR10	22	30163358	30166402	rs2009354	rs11090584	-6.76	0.115	-0.752	0.452
ENSG00000135506.OS9	12	58087738	58115340	rs4760169	rs4646536	-4.28	-0.542	0.7508	0.45279
ENSG00000179889.PDXDC1	16	15068448	15233196	rs1135999	rs4985155	-4.18	-0.75	0.75	0.453
ENSG00000149196.C11orf73	11	86013253	86056969	rs11234658	rs7937090	-3.92	1.372	0.7502	0.453149
ENSG00000145198.VWA5B2	3	183948217	183960117	rs843351	rs843348	-5.64	0.75	-0.75	0.453255
ENSG00000127463.EMC1	1	19542158	19578046	rs3828102	rs16862632	-3.81	0.242	-0.7496	0.45348
ENSG00000079931.MOXD1	6	132617194	132722684	rs12528986	rs1416100	-2.92	-1.374	0.7489	0.45391
ENSG00000145982.FARS2	6	5261277	5771813	rs2503813	rs4960084	-4.27	-1.126	0.7481	0.45439
ENSG00000197355.UAP1L1	9	139971953	139978991	rs7047770	rs3750518	-5.59	-0.658	0.7481	0.45442
ENSG00000081760.AACS	12	125549925	125627873	rs7961498	rs10846840	3.41	-1.019	-0.7474	0.45484
ENSG00000162517.PEF1	1	32095463	32110497	rs2050256	rs945213	-3.4	0.561	-0.7474	0.45484
ENSG00000131016.AKAP12	6	151561134	151679692	rs2294793	rs926561	-3.62	-1.174	0.7462	0.45553
ENSG00000088992.TESC	12	117476728	117537284	rs904660	rs7973925	-5.84	0.744	-0.744	0.45688
ENSG00000003393.ALS2	2	202565277	202645912	rs10183613	rs10931969	-3.54	-0.438	0.7407	0.458867
ENSG00000132612.VPS4A	16	69345259	69358949	rs28409143	rs35076456	5.1	1.053	0.7413	0.459
ENSG00000095380.NANS	9	100819021	100845357	rs10818575	rs16912590	-4.77	-0.388	0.7394	0.45966
ENSG00000168575.SLC20A2	8	42273993	42397069	rs10958713	rs2974340	4.09	0.738	0.738	0.461
ENSG00000167193.CRK	17	1323983	1366456	rs12944784	rs7208768	4.29	0.733	0.733	0.46356
ENSG00000187231.SESTD1	2	179966419	180129517	rs12474600	rs13382185	-3.88	0.732	-0.732	0.464169
ENSG00000116981.NT5C1A	1	40124793	40137710	rs12127094	rs9662128	5.37	-0.731	-0.731	0.46478
ENSG00000185666.SYN3	22	32908539	33454358	rs17692518	rs12158631	-4.46	-0.8	0.7232	0.47
ENSG00000004700.RECQL	12	21621845	21654603	rs12818296	rs10770818	-4.31	-0.722	0.722	0.47029
ENSG00000127884.ECHS1	10	135175984	135187193	rs11101745	rs10776675	5.95	-0.295	0.7207	0.47109
ENSG00000140945.CDH13	16	82660408	83830204	rs9940524	rs12933503	-4.26	0.434	0.7185	0.472
ENSG00000143363.PRUNE	1	150980896	151008189	rs267734	rs7532312	3.62	0.719	0.719	0.47214
ENSG00000149600.COMMD7	20	31290493	31331803	rs2235760	rs6058755	3.74	-1.135	-0.7137	0.4754
ENSG00000143164.DCAF6	1	167905021	168045081	rs4657739	rs11558511	-4.46	0.947	-0.7116	0.47669
ENSG00000143436.MRPL9	1	151732119	151736040	rs3790508	rs6692364	-5.06	-0.711	0.711	0.47708
ENSG00000122547.EEPD1	7	36192758	36341152	rs4723467	rs196567	4.05	0.448	0.70898	0.478
ENSG00000013583.HEBP1	12	13127798	13153207	rs1486326	rs929683	3.07	-0.463	0.7058	0.48031
ENSG00000122574.WIPF3	7	29846102	29956682	rs174931	rs17606308	-5.15	-0.392	0.70341	0.482
ENSG00000154027.AK5	1	77747736	78025651	rs9787306	rs3509	4.1	-0.703	-0.703	0.48206
ENSG00000137992.DBT	1	100652475	100715390	rs12060945	rs2810418	-5.07	0.701	-0.701	0.4833
ENSG00000136810.TXN	9	113006091	113018920	rs10119804	rs1049927	-5.74	-0.024	0.7006	0.48356
ENSG00000147853.AK3	9	4711155	4742043	rs1048020	rs17717946	4.9	-1.212	-0.6994	0.48433
ENSG00000140259.MFAP1	15	44096690	44117000	rs8040336	rs4997480	3.08	0.699	0.699	0.48455
ENSG00000099977.DDT	22	24313554	24322660	rs9624364	rs4822458	-7.65	-0.107	0.6976	0.485
ENSG00000125266.EFNB2	13	107142079	107187462	rs1077734	rs2391355	-3.12	0.969	0.6978	0.4853
ENSG00000148671.ADIRF	10	88727949	88743691	rs12240750	rs12416136	4.07	0.697	0.697	0.4858
ENSG00000138031.ADCY3	2	25042038	25142708	rs955855	rs11676272	-4.13	0.906	-0.6963	0.486258
ENSG00000162174.ASRGL1	11	62104920	62160882	rs1528728	rs6863	6.88	-0.273	0.6913	0.489348
ENSG00000146085.MUT	6	49398073	49430904	rs7453050	rs12528625	3.98	-0.193	-0.6912	0.48941
ENSG00000103485.QPRT	16	29674600	29710020	rs11648675	rs12596308	7.35	1.53	0.6911	0.49
ENSG00000133460.SLC2A11	22	24198890	24228496	rs9624364	rs9612503	-5.23	0.689	-0.689	0.491
ENSG00000068971.PPP2R5B	11	64685025	64701945	rs733303	rs2285346	-3.44	-1.233	0.6887	0.491028
ENSG00000156535.CD109	6	74405508	74538040	rs12194928	rs4706552	4.17	0.362	-0.6869	0.49213
ENSG00000065609.SNAP91	6	84262599	84419410	rs7749272	rs63034	4.87	-0.691	-0.6862	0.49258
ENSG00000106993.CDC37L1	9	4679559	4708398	rs1048020	rs445684	-5.52	0.832	-0.68	0.49649
ENSG00000140043.PTGR2	14	74318547	74353530	rs2878733	rs8013123	6.53	-0.645	-0.6797	0.49671
ENSG00000140682.TGFB1I1	16	31482906	31489281	rs9929832	rs13337037	3.66	-0.679	-0.679	0.497
ENSG00000161533.ACOX1	17	73937588	73975515	rs3744033	rs3682	3.38	0.516	0.678	0.49756
ENSG00000213366.GSTM2	1	110210644	110252171	rs650985	rs1927328	-6.29	-0.653	0.6781	0.49768
ENSG00000167693.NXN	17	702553	883010	rs12942654	rs2114	4.32	-0.138	0.677	0.49815
ENSG00000176390.CRLF3	17	29096406	29151794	rs35958868	rs7503542	-6.39	0.408	-0.677	0.49831
ENSG00000121064.SCPEP1	17	55055466	55084129	rs8078110	rs205499	3.28	-0.291	-0.677	0.4985
ENSG00000143149.ALDH9A1	1	165631453	165668100	rs10918228	rs12408101	-3.78	-1.063	0.6758	0.49915
ENSG00000166501.PRKCB	16	23847322	24231932	rs198199	rs17753569	-4.32	0.874	-0.6745	0.5
ENSG00000157036.EXOG	3	38537618	38583652	rs9311191	rs13085153	3.87	0.674	0.674	0.500311
ENSG00000177106.EPS8L2	11	694438	727727	rs12805435	rs11246286	4.6	0.672	0.672	0.501584
ENSG00000186377.CYP4X1	1	47427036	47516423	rs9699826	rs1553390	-3.63	-1.512	0.6716	0.50183
ENSG00000091140.DLD	7	107531415	107572175	rs4727688	rs6466199	-4	-0.859	0.6709	0.502
ENSG00000254986.DPP3	11	66247484	66277130	rs2275998	rs678397	-3.94	-0.029	-0.669	0.503496
ENSG00000120306.CYSTM1	5	139554227	139661637	rs7737543	rs269782	-6.14	0.668	-0.668	0.5041
ENSG00000059573.ALDH18A1	10	97365696	97416463	rs10882619	rs11595248	-4.89	-0.668	0.668	0.50413
ENSG00000087299.L2HGDH	14	50704281	50779266	rs10134448	rs12894758	-5.3	0.667	-0.667	0.50477
ENSG00000105607.GCDH	19	13001840	13025021	rs4804736	rs8012	-8.01	-0.549	0.6642	0.50658
ENSG00000240344.PPIL3	2	201735630	201754026	rs10515941	rs11892119	-9.36	-0.904	0.6637	0.50689
ENSG00000138688.KIAA1109	4	123073488	123283913	rs2892988	rs17388568	-3.9	0.663	-0.663	0.507
ENSG00000239900.ADSL	22	40742507	40786467	rs8135759	rs8135371	4.83	-0.657	-0.657	0.511
ENSG00000104763.ASAH1	8	17913934	17942494	rs574774	rs2283118	-6.18	0.421	-0.6574	0.511
ENSG00000137274.BPHL	6	3118608	3153812	rs1040861	rs3799216	-7.39	0.703	-0.6571	0.51108
ENSG00000021300.PLEKHB1	11	73357223	73373864	rs7935178	rs1525749	4.13	0.934	0.657	0.511199
ENSG00000078304.PPP2R5C	14	102228135	102394326	rs2720202	rs8006692	-4.45	-0.31	0.657	0.51121
ENSG00000079739.PGM1	1	64058947	64125916	rs13374611	rs3790861	-3.67	-0.767	0.655	0.51249
ENSG00000075975.MKRN2	3	12598513	12625212	rs3729931	rs11706408	3.7	0.653	0.653	0.513756
ENSG00000143740.SNAP47	1	227916240	227968927	rs1923821	rs6683869	-5.02	-0.046	0.6529	0.5138
ENSG00000184674.GSTT1	22	24376133	24384680	rs9624364	rs738809	-8.36	-1.016	0.6479	0.517
ENSG00000101160.CTSZ	20	57570240	57582302	rs11697149	rs6064731	-4.58	1.231	-0.6475	0.51729
ENSG00000121060.TRIM25	17	54965270	54991399	rs8065197	rs6503772	4.2	-0.715	-0.647	0.51776
ENSG00000107959.PITRM1	10	3179920	3215003	rs17131865	rs7092621	7.31	-0.872	-0.6463	0.51811
ENSG00000091640.SPAG7	17	4862521	4871167	rs17633650	rs16942615	4.25	-0.645	-0.645	0.51893
ENSG00000180667.YOD1	1	207217194	207226325	rs9943268	rs2306714	4.84	-1.057	-0.6402	0.52202
ENSG00000091409.ITGA6	2	173292082	173371181	rs12151618	rs10185752	4.96	-0.754	-0.6398	0.522281
ENSG00000140650.PMM2	16	8882680	8943188	rs4985056	rs12049	4.64	0.634	0.634	0.526
ENSG00000196663.TECPR2	14	102829300	102968818	rs9743505	rs4900536	-3.45	-0.311	0.6328	0.52684
ENSG00000162139.NEU3	11	74699179	74729938	rs4944972	rs488115	-4.12	-0.55	0.6304	0.528433
ENSG00000196586.MYO6	6	76458909	76629254	rs9343340	rs1280049	-7.04	0.629	-0.629	0.52935
ENSG00000148672.GLUD1	10	88810243	88854623	rs12240750	rs4869	-3.56	-2.496	0.6286	0.52963
ENSG00000110880.CORO1C	12	109038885	109125372	rs12579216	rs10746129	-6.79	-0.307	0.6276	0.53028
ENSG00000126602.TRAP1	16	3701640	3767598	rs38025	rs11646287	-6.87	-0.419	-0.6247	0.532
ENSG00000172673.THEMIS	6	128029217	128239776	rs17055025	rs11753972	-3.83	-1.23	0.6231	0.53324
ENSG00000100427.MLC1	22	50497820	50524331	rs4838859	rs6010165	-5.08	0.61	-0.6222	0.534
ENSG00000137198.GMPR	6	16238811	16295780	rs7763395	rs7763322	3.84	1.479	0.6204	0.53498
ENSG00000133433.GSTT2B	22	24299601	24303373	rs9624364	rs2739338	9.45	0.179	-0.6207	0.535
ENSG00000155876.RRAGA	9	19049372	19051019	rs10757028	rs4419893	3.86	-0.525	0.6203	0.53507
ENSG00000176393.RNPEP	1	201951500	201975275	rs12090635	rs4630172	-5.79	0.497	-0.6199	0.53532
ENSG00000164933.SLC25A32	8	104410863	104427417	rs2131858	rs17803441	-5.23	0.438	-0.6182	0.536
ENSG00000156587.UBE2L6	11	57319129	57335757	rs499188	rs2729376	-3.47	1.278	-0.6188	0.536044
ENSG00000144711.IQSEC1	3	12938719	13114617	rs17037535	rs444944	-4.51	-0.389	0.6188	0.536061
ENSG00000041982.TNC	9	117782806	117880536	rs2104771	rs1537016	4.69	-0.493	-0.6186	0.53616
ENSG00000159640.ACE	17	61554422	61599205	rs4465659	rs4309	-5.76	-0.378	-0.617	0.53697
ENSG00000222011.FAM185A	7	102389418	102449672	rs10487279	rs6465876	-4.18	1.477	-0.61509	0.538
ENSG00000128928.IVD	15	40697686	40728146	rs603104	rs7165012	-6.91	-0.155	0.616	0.53822
ENSG00000026103.FAS	10	90750414	90775542	rs11202898	rs7097572	9.62	-0.954	-0.6153	0.53838
ENSG00000066629.EML1	14	100204030	100408397	rs7157032	rs8020741	-4.68	-1.047	0.6144	0.53895
ENSG00000065882.TBC1D1	4	37892708	38140796	rs1863329	rs12511756	3.65	-0.644	-0.6142	0.539
ENSG00000099864.PALM	19	708953	748329	rs2238553	rs3787019	-5.53	-0.613	0.613	0.53988
ENSG00000160678.S100A1	1	153600402	153604513	rs28416529	rs3818632	-5.58	-0.612	0.612	0.54054
ENSG00000074590.NUAK1	12	106457118	106533811	rs1215599	rs17038085	3.98	0.61	0.61	0.54186
ENSG00000037757.MRI1	19	13875346	13885096	rs10422746	rs371671	-6.87	-0.62	0.6099	0.54191
ENSG00000092068.SLC7A8	14	23594504	23652883	rs17126483	rs3783436	-4.67	1.244	-0.6087	0.54274
ENSG00000048392.RRM2B	8	103216730	103251346	rs2067029	rs1052071	5.49	0.608	0.608	0.543
ENSG00000154721.JAM2	21	27011584	27089874	rs10854295	rs11087969	3.6	1.401	0.608	0.5431
ENSG00000164326.CARTPT	5	71014990	71016875	rs281126	rs12108688	3.98	-1.023	-0.6076	0.5434
ENSG00000004139.SARM1	17	26691378	26728065	rs2006933	rs739439	7.36	0.605	0.605	0.54518
ENSG00000148334.PTGES2	9	130882972	130890741	rs13283456	rs4837235	-4.35	1.088	-0.6016	0.54745
ENSG00000153406.NMRAL1	16	4511681	4545764	rs3747575	rs11557236	-7.98	-0.503	0.6007	0.548
ENSG00000138119.MYOF	10	95066186	95242074	rs2140553	rs11594445	-6.27	-0.6	0.6	0.54851
ENSG00000188732.FAM221A	7	23719749	23742868	rs7779633	rs4722245	4.7	-1.505	-0.59967	0.549
ENSG00000100243.CYB5R3	22	43013846	43045574	rs4822185	rs137107	-5.42	1.495	-0.5971	0.55
ENSG00000091664.SLC17A6	11	22359643	22401049	rs2671116	rs11026523	-3.96	0.237	-0.5969	0.550596
ENSG00000164904.ALDH7A1	5	125877533	125931110	rs7701889	rs17154671	4.82	-0.593	-0.593	0.5532
ENSG00000164182.NDUFAF2	5	60240956	60448853	rs16878547	rs11956542	3.95	1.347	0.5922	0.5537
ENSG00000166848.TERF2IP	16	75681684	75795770	rs7193066	rs12599322	-3.41	-0.778	0.5899	0.555
ENSG00000134202.GSTM3	1	110276554	110284384	rs650985	rs11101992	9.07	0.616	0.59	0.55516
ENSG00000163510.CWC22	2	180809603	180871840	rs10497557	rs11900886	-4.1	-0.59	0.59	0.555191
ENSG00000164172.MOCS2	5	52391509	52405893	rs30088	rs3212639	-9.33	0.589	-0.5901	0.5552
ENSG00000075711.DLG1	3	196769431	197026171	rs6583202	rs35370245	-4.67	-0.869	0.587	0.557206
ENSG00000196353.CPNE4	3	131252399	132004254	rs6439301	rs1320900	-4.05	-0.584	0.584	0.55922
ENSG00000106153.CHCHD2	7	56169262	56174269	rs7793921	rs7801169	-3.68	0.582	-0.58214	0.56
ENSG00000163382.APOA1BP	1	156561554	156564091	rs12724719	rs4661188	-8.54	1.05	-0.5806	0.56154
ENSG00000176978.DPP7	9	140004994	140009629	rs7047770	rs6420280	-7.62	0.58	-0.58	0.56191
ENSG00000119523.ALG2	9	101978708	101984238	rs7863354	rs410180	-3.09	0.872	-0.5791	0.56255
ENSG00000215845.TSTD1	1	161007421	161008780	rs12403334	rs4559524	6.03	-0.264	-0.5777	0.56345
ENSG00000123106.CCDC91	12	28286182	28732883	rs11049559	rs10843139	5.15	0.193	0.577	0.56397
ENSG00000127948.POR	7	75528518	75616173	rs8509	rs3898649	4.87	1.301	-0.57513	0.565
ENSG00000111906.HDDC2	6	125541108	125623282	rs1547786	rs9491346	-8.98	-0.571	0.5751	0.56525
ENSG00000128829.EIF2AK4	15	40226347	40327797	rs12164905	rs8041057	-4.88	0.575	-0.575	0.56529
ENSG00000095713.CRTAC1	10	99624757	99790585	rs10786380	rs7922066	-3.89	1.48	-0.5746	0.56559
ENSG00000125246.CLYBL	13	100258919	100549387	rs1341399	rs3783185	9.31	-0.274	-0.5742	0.5658
ENSG00000169762.TAPT1	4	16162128	16229033	rs10034143	rs1025897	3.87	0.573	0.573	0.567
ENSG00000108219.TSPAN14	10	82213922	82292879	rs7088704	rs1340380	-4.58	1.007	-0.5713	0.5678
ENSG00000085449.WDFY1	2	224720433	224810104	rs10191694	rs12694622	-4.43	-0.73	0.5709	0.56804
ENSG00000148834.GSTO1	10	105995114	106027217	rs11599497	rs2282326	-5.61	0.077	-0.5706	0.5683
ENSG00000223802.CERS1	19	18979361	19007536	rs4808874	rs1468461	-3.63	-0.631	0.5705	0.56832
ENSG00000110697.PITPNM1	11	67259239	67273734	rs11603236	rs7927381	-3.88	-0.57	0.57	0.568678
ENSG00000243156.MICAL3	22	18270415	18507325	rs2587113	rs361893	-3	0.549	-0.569	0.569
ENSG00000169299.PGM2	4	37828255	37864558	rs11096913	rs3756142	8.54	-0.569	-0.569	0.569
ENSG00000084207.GSTP1	11	67351066	67354131	rs17510687	rs1695	-9.13	-0.19	0.5674	0.570422
ENSG00000144746.ARL6IP5	3	69134095	69155217	rs6549184	rs11128111	4.82	-1.361	-0.5599	0.575539
ENSG00000181915.ADO	10	64564516	64568238	rs6479850	rs1848797	-8.16	-0.541	0.5598	0.57563
ENSG00000106733.NMRK1	9	77675489	77703133	rs773141	rs2376397	4.3	-1.342	-0.5567	0.57776
ENSG00000163389.POGLUT1	3	119187785	119213555	rs1880661	rs7653123	4.51	-0.621	-0.5554	0.578617
ENSG00000165644.COMTD1	10	76993727	76995788	rs1259580	rs12217731	-4.37	-0.008	-0.5547	0.5791
ENSG00000196290.NIF3L1	2	201754050	201768655	rs7224	rs10167387	3.73	-0.554	-0.554	0.579579
ENSG00000134014.ELP3	8	27947190	28048673	rs10104739	rs1377338	4.45	0.551	0.551	0.582
ENSG00000166888.STAT6	12	57489191	57525922	rs1799986	rs324013	4.75	0.55	0.55	0.58232
ENSG00000110931.CAMKK2	12	121675497	121736111	rs208305	rs2071272	-4.63	0.545	-0.545	0.58575
ENSG00000132394.EEFSEC	3	127872297	128127485	rs9851497	rs1735546	-4.78	-0.456	0.5445	0.586094
ENSG00000196151.WDSUB1	2	160092304	160143310	rs3771706	rs7564250	-9.09	0.704	-0.5418	0.587984
ENSG00000134201.GSTM5	1	110254864	110318050	rs650985	rs1927328	-6.74	-0.653	0.5414	0.58825
ENSG00000162616.DNAJB4	1	78444859	78483648	rs1166698	rs1780050	-3.84	1.275	0.5371	0.59122
ENSG00000110315.RNF141	11	10533225	10562777	rs4910149	rs10770123	4.44	-0.255	-0.5358	0.592087
ENSG00000214113.LYRM4	6	5102827	5261172	rs7738402	rs2224391	-5.16	-0.655	0.5341	0.59326
ENSG00000198130.HIBCH	2	191054461	191208919	rs13382543	rs2664253	-8.57	1.343	-0.5336	0.593584
ENSG00000168958.MFF	2	228189867	228222550	rs6708202	rs7560053	4.6	0.205	0.5334	0.593788
ENSG00000134817.APLNR	11	57001051	57004709	rs648409	rs11606862	-3.19	0.154	-0.5327	0.594267
ENSG00000155906.RMND1	6	151725989	151773259	rs2294793	rs11550103	-7.65	0.589	-0.5275	0.59781
ENSG00000163596.ICA1L	2	203640690	203736708	rs7579055	rs6705330	5.48	-0.111	-0.5275	0.597867
ENSG00000137944.CCBL2	1	89401456	89458636	rs7911	rs7532151	-10.85	-0.486	0.5269	0.5983
ENSG00000124126.PREX1	20	47240790	47444420	rs2024594	rs2093348	3.59	0.585	-0.5261	0.59883
ENSG00000197548.ATG7	3	11313995	11599139	rs2442781	rs2594966	-5.57	-0.526	0.526	0.598888
ENSG00000121940.CLCC1	1	109472130	109506111	rs17030869	rs12569030	-3.43	-0.73	0.5257	0.59912
ENSG00000136193.SCRN1	7	29959719	30029905	rs174931	rs1049395	-3.64	0.283	-0.52351	0.601
ENSG00000067715.SYT1	12	79257773	79845788	rs17041558	rs6539284	-8.38	-0.522	0.522	0.60167
ENSG00000258429.PDF	16	69362524	69364498	rs2310818	rs1127231	3.72	0.521	0.521	0.602
ENSG00000130287.NCAN	19	19322782	19363042	rs12610057	rs2238675	-4.82	0.032	-0.5213	0.60217
ENSG00000167107.ACSF2	17	48503519	48552206	rs7208018	rs917027	-3.22	-0.366	-0.52	0.60298
ENSG00000106066.CPVL	7	29034847	29235067	rs4722888	rs245883	4.75	0.654	-0.518	0.604
ENSG00000112425.EPM2A	6	145822719	146057160	rs17797750	rs426371	-4.81	-0.533	0.5175	0.60482
ENSG00000157881.PANK4	1	2439972	2458039	rs4233033	rs7535528	-7.51	0.105	0.5132	0.60779
ENSG00000183134.PTGDR2	11	60618413	60623444	rs7930940	rs630084	-3.67	-0.513	0.513	0.607951
ENSG00000128335.APOL2	22	36622256	36636000	rs2012928	rs9619597	-6.5	-0.495	0.5123	0.608
ENSG00000267673.FDX1L	19	10416103	10426691	rs3093030	rs280523	-3.91	0.79	-0.5102	0.6099
ENSG00000136267.DGKB	7	14184674	15014402	rs6949675	rs714980	5.72	-1.162	-0.51039	0.61
ENSG00000049656.CLPTM1L	5	1317859	1345214	rs2963259	rs10060827	-2.87	0.445	-0.5091	0.6107
ENSG00000119711.ALDH6A1	14	74523553	74551196	rs7152352	rs3742810	-4.3	0.265	0.5087	0.61094
ENSG00000071967.CYBRD1	2	172378757	172414643	rs17221346	rs2542941	9.31	-0.038	-0.5085	0.611137
ENSG00000134461.ANKRD16	10	5903580	5931869	rs6602360	rs2380205	-5.05	0.415	0.5071	0.61209
ENSG00000105755.ETHE1	19	44010871	44031396	rs433226	rs12980205	-4.59	0.909	-0.5052	0.6134
ENSG00000173267.SNCG	10	88718375	88723017	rs12240750	rs1240390	-4.91	-0.505	0.505	0.61356
ENSG00000087008.ACOX3	4	8368009	8442450	rs1720018	rs12507368	5.62	0.769	0.5023	0.615
ENSG00000151445.VIPAS39	14	77893018	77924295	rs8012228	rs10130481	-4.67	-1.222	0.5008	0.61652
ENSG00000114450.GNB4	3	179116990	179169378	rs10049286	rs7610174	4.64	-0.498	-0.498	0.618484
ENSG00000183020.AP2A2	11	924894	1012239	rs6597953	rs11246374	3.68	0.383	0.4977	0.618701
ENSG00000168118.RAB4A	1	229406822	229441641	rs7513494	rs12132864	-3.35	-1.885	0.4966	0.61949
ENSG00000147592.LACTB2	8	71547553	71581409	rs2726312	rs2035196	4.28	0.495	0.495	0.621
ENSG00000100523.DDHD1	14	53510686	53620000	rs10483619	rs12880404	-3.55	-1.562	0.491	0.62344
ENSG00000104522.TSTA3	8	144694788	144700218	rs10100154	rs7817301	3.96	-0.455	0.4906	0.624
ENSG00000177459.C8orf47	8	99076539	99105838	rs16896768	rs2513829	3.94	1.348	0.4905	0.624
ENSG00000111450.STX2	12	131274145	131323811	rs10848243	rs10773819	4.29	-0.489	-0.489	0.62484
ENSG00000120915.EPHX2	8	27348296	27403081	rs1532278	rs6990733	6.7	-0.775	0.4889	0.625
ENSG00000122367.LDB3	10	88428206	88495825	rs3740342	rs2803546	3.24	-0.817	-0.488	0.62558
ENSG00000215114.UBXN2B	8	59323823	59364060	rs10957053	rs2859998	-4.03	-0.487	0.487	0.626
ENSG00000139131.YARS2	12	32880424	32908836	rs4931044	rs12317270	-5.48	0.486	-0.486	0.62697
ENSG00000115255.REEP6	19	1491165	1497926	rs1875960	rs791470	-7.32	0.486	-0.486	0.62697
ENSG00000160200.CBS	21	44473301	44497053	rs3788054	rs6586282	4.68	0.486	0.486	0.627
ENSG00000119471.HSDL2	9	115142217	115234690	rs6477925	rs7852741	5.04	-0.941	-0.4846	0.62795
ENSG00000196865.NHLRC2	10	115614420	115676953	rs7895170	rs2301180	-5.4	-0.484	0.484	0.62839
ENSG00000102763.VWA8	13	42140973	42535256	rs11617929	rs9315868	-8.87	-0.421	0.4774	0.6331
ENSG00000080815.PSEN1	14	73603126	73690399	rs17182286	rs10498532	-4.62	-0.475	0.475	0.63479
ENSG00000074660.SCARF1	17	1537152	1549041	rs9747855	rs7224583	-4.45	1.512	0.471	0.63771
ENSG00000177465.ACOT4	14	74058410	74063200	rs11626122	rs2041073	-6.07	0.977	-0.4687	0.63927
ENSG00000161526.SAP30BP	17	73663196	73704142	rs1671019	rs4788901	-3.35	0.126	-0.468	0.64009
ENSG00000040933.INPP4A	2	99061317	99210853	rs11123677	rs13402379	-3.5	0.703	-0.4674	0.640188
ENSG00000124098.FAM210B	20	54933971	54943719	rs6127709	rs8118732	4.61	-0.461	-0.4668	0.64063
ENSG00000184743.ATL3	11	63391559	63439393	rs640908	rs10501394	-4.69	-0.466	0.466	0.641216
ENSG00000186132.C2orf76	2	120059801	120124404	rs1530561	rs4608534	5.19	0.373	0.4639	0.64271
ENSG00000170632.ARMC10	7	102715328	102740205	rs12540583	rs869332	-5.18	1.26	0.46289	0.643
ENSG00000125144.MT1G	16	56700643	56701977	rs12934166	rs12598600	-3.65	-0.166	-0.4621	0.644
ENSG00000198951.NAGA	22	42454358	42466846	rs10154700	rs4822084	3.41	-0.564	-0.46	0.646
ENSG00000104412.EMC2	8	109455830	109499145	rs1979443	rs10111457	-3.37	0.017	-0.4592	0.646
ENSG00000072756.TRNT1	3	3168600	3192563	rs1672735	rs4685607	5.54	0.458	0.458	0.646952
ENSG00000172379.ARNT2	15	80696692	80890278	rs3848175	rs3858944	-3.48	0.168	0.457	0.64748
ENSG00000104518.GSDMD	8	144635377	144645232	rs11786665	rs12541647	3.97	-0.9	-0.456	0.648
ENSG00000112031.MTRF1L	6	153308497	153323820	rs11155881	rs6921137	-4.86	0.217	-0.455	0.64911
ENSG00000119318.RAD23B	9	110045418	110094475	rs7032927	rs1805330	4.17	-0.455	-0.455	0.64911
ENSG00000173566.NUDT18	8	21964383	21966932	rs6557781	rs6557826	4.38	-0.454	-0.454	0.65
ENSG00000126522.ASL	7	65540785	65558545	rs365896	rs709609	-7.07	-0.322	0.45283	0.651
ENSG00000069849.ATP1B3	3	141594966	141645356	rs9942	rs3792411	7.78	-0.451	-0.451	0.65199
ENSG00000130304.SLC27A1	19	17579578	17616977	rs10423221	rs7247270	2.94	0.429	0.4498	0.65288
ENSG00000126790.L3HYPDH	14	59927081	59951148	rs10133177	rs8660	-5.77	-0.166	-0.4497	0.65295
ENSG00000187764.SEMA4D	9	91975702	92113045	rs7045789	rs4132699	-3.95	-0.401	-0.4428	0.65792
ENSG00000103150.MLYCD	16	83932731	83949787	rs153658	rs16962277	-4.91	-0.347	-0.4397	0.66
ENSG00000106524.ANKMY2	7	16639401	16685442	rs696281	rs11532682	5.25	-1.271	-0.43983	0.66
ENSG00000068976.PYGM	11	64513861	64527769	rs677298	rs489192	-3.37	0.609	-0.4389	0.660716
ENSG00000135823.STX6	1	180941861	180992047	rs2297184	rs6665134	4.71	-0.438	-0.438	0.66139
ENSG00000172264.MACROD2	20	13976015	16033842	rs6042672	rs17711684	-4.61	-0.436	0.436	0.66284
ENSG00000100280.AP1B1	22	29723669	29819168	rs1003703	rs174762	-5.2	-0.46	0.4361	0.663
ENSG00000133731.IMPA1	8	82570196	82598928	rs10112819	rs1967328	-4.44	0.434	-0.434	0.664
ENSG00000197375.SLC22A5	5	131705444	131731306	rs4646305	rs1859085	-5.18	-0.432	0.432	0.6657
ENSG00000074695.LMAN1	18	56995055	57027194	rs10515978	rs12604758	-7.37	0.432	-0.432	0.66574
ENSG00000133574.GIMAP4	7	150264365	150271041	rs4725906	rs11769828	6.68	-0.656	-0.43108	0.666
ENSG00000164039.BDH2	4	104000592	104021040	rs7660298	rs6830624	3.47	-0.97	-0.4308	0.667
ENSG00000153015.CWC27	5	64064757	64314590	rs6872582	rs1433609	5.34	-0.429	-0.429	0.6679
ENSG00000166260.COX11	17	53029263	53046146	rs8065212	rs12936957	-5.23	-0.727	0.426	0.66977
ENSG00000125257.ABCC4	13	95672083	95953687	rs10508011	rs7986283	3.46	1.289	0.4253	0.6706
ENSG00000243789.JMJD7	15	42120283	42129779	rs11070352	rs1197690	-4.92	0.15	-0.424	0.67171
ENSG00000168461.RAB31	18	9708162	9862548	rs17508949	rs658836	3.84	0.503	-0.421	0.67368
ENSG00000142657.PGD	1	10458649	10480201	rs544289	rs6541094	3.63	-0.421	-0.421	0.67376
ENSG00000006282.SPATA20	17	48620419	48633213	rs7208018	rs28498091	-8.21	0.05	-0.42	0.67434
ENSG00000090920.FCGBP	19	40353963	40440533	rs3810386	rs3760920	6.14	-0.035	-0.4165	0.67705
ENSG00000133943.C14orf159	14	91526677	91691976	rs4900070	rs4900071	-10.59	0.415	-0.415	0.67814
ENSG00000106976.DNM1	9	130965658	131017527	rs13283456	rs10987908	3.93	-0.728	-0.4134	0.67934
ENSG00000140374.ETFA	15	76507696	76603813	rs2955764	rs12901160	5.33	0.409	0.409	0.68254
ENSG00000128059.PPAT	4	57259528	57301781	rs9684298	rs7696808	4.88	0.409	0.409	0.683
ENSG00000151640.DPYSL4	10	134000404	134019280	rs4880335	rs2637629	4.77	-0.213	0.4081	0.68318
ENSG00000119326.CTNNAL1	9	111704851	111775809	rs1519466	rs3750457	4.36	-0.734	-0.4081	0.68319
ENSG00000262304.SHPK	17	3468738	3539543	rs1488688	rs17707155	6.66	0.645	0.407	0.68405
ENSG00000171533.MAP6	11	75297963	75380165	rs1793398	rs589063	3.97	-0.212	-0.4065	0.684351
ENSG00000168280.KIF5C	2	149632819	149883273	rs12616265	rs17347194	4.83	-0.535	0.4051	0.685397
ENSG00000078674.PCM1	8	17780349	17885478	rs11780804	rs208753	-8.55	0.404	-0.404	0.686
ENSG00000144712.CAND2	3	12837971	12913415	rs2600228	rs4642101	-8.59	-0.441	0.4039	0.68628
ENSG00000117054.ACADM	1	76190036	76253260	rs8763	rs211718	7.07	0.756	0.4028	0.68709
ENSG00000107669.ATE1	10	123499939	123688316	rs2935715	rs10788213	4.5	0.607	-0.4025	0.68728
ENSG00000114491.UMPS	3	124449213	124464040	rs4141663	rs333267	7.6	0.377	0.398	0.690659
ENSG00000132305.IMMT	2	86371055	86422893	rs7583021	rs7598787	4.47	0.397	0.397	0.691367
ENSG00000169715.MT1E	16	56659387	56661024	rs421859	rs3859113	3.29	-1.305	-0.3945	0.693
ENSG00000169515.CCDC8	19	46913629	46916841	rs4803941	rs427250	4.81	0.861	0.394	0.69361
ENSG00000144566.RAB5A	3	19988571	20026667	rs6808352	rs13085450	5.14	0.41	-0.3858	0.69967
ENSG00000169213.RAB3B	1	52373628	52456436	rs10888744	rs2244262	5.26	0.38	0.3857	0.69969
ENSG00000176623.RMDN1	8	87480486	87526586	rs16915620	rs6985066	-5.14	0.385	-0.385	0.7
ENSG00000006114.SYNRG	17	35874900	35969544	rs1859212	rs2074411	3.19	0.026	0.385	0.70029
ENSG00000152256.PDK1	2	173420101	173489823	rs12151618	rs13425344	-3.7	-0.181	-0.3831	0.701619
ENSG00000090013.BLVRB	19	40953696	40971747	rs8110888	rs2169275	3.32	-1.178	-0.3829	0.70179
ENSG00000204138.PHACTR4	1	28696114	28826881	rs35665752	rs9286966	-3.56	-0.381	0.381	0.7032
ENSG00000012779.ALOX5	10	45869661	45941561	rs702366	rs2099171	-3.33	1.232	-0.3802	0.70378
ENSG00000136153.LMO7	13	76194570	76434004	rs12427729	rs7323086	3.78	1.218	0.3782	0.7053
ENSG00000137764.MAP2K5	15	67835047	68099461	rs3743353	rs12902812	-3.83	0.321	-0.378	0.7056
ENSG00000111850.SMIM8	6	88032301	88052043	rs370228	rs410683	-5.52	-0.505	0.3776	0.7057
ENSG00000172340.SUCLG2	3	67410884	67705038	rs9828970	rs17806888	-4.84	-0.04	-0.3776	0.705738
ENSG00000149782.PLCB3	11	64018995	64036622	rs4672	rs12794145	4.29	-0.377	-0.377	0.706174
ENSG00000110514.MADD	11	47290712	47351582	rs11606287	rs11570115	-4.35	0.375	-0.375	0.70766
ENSG00000090615.GOLGA3	12	133345495	133405444	rs2291256	rs13254	-3.75	-0.375	0.375	0.70766
ENSG00000066427.ATXN3	14	92524896	92572965	rs8004117	rs2295165	4.98	1.344	0.3728	0.70933
ENSG00000131626.PPFIA1	11	70116806	70230509	rs11235649	rs6592522	-4.68	-0.372	0.372	0.709893
ENSG00000181192.DHTKD1	10	12110971	12165224	rs10508438	rs9424148	8.92	0.553	0.3719	0.70994
ENSG00000159322.ADPGK	15	73043710	73078187	rs4514651	rs730180	-4.25	-0.371	0.371	0.71064
ENSG00000085433.WDR47	1	109512836	109584850	rs28553535	rs865151	-3.96	-0.382	0.3702	0.71125
ENSG00000140950.TLDC1	16	84511681	84587639	rs8055365	rs428032	-5.53	1.163	-0.3689	0.712
ENSG00000170876.TMEM43	3	14166440	14185179	rs6762079	rs2305843	-3.19	0.369	-0.369	0.712128
ENSG00000111325.OGFOD2	12	123459127	123464590	rs7953894	rs7296418	3.41	-1.779	-0.3664	0.71406
ENSG00000125741.OPA3	19	46030685	46105470	rs12978792	rs17286686	-5.37	-0.523	0.3641	0.71577
ENSG00000110063.DCPS	11	126173647	126215644	rs2282580	rs4553380	3.32	0.735	-0.3612	0.717949
ENSG00000007402.CACNA2D2	3	50400233	50541675	rs1076872	rs28365992	-3.42	0.967	-0.3585	0.719965
ENSG00000121691.CAT	11	34460472	34493609	rs2300181	rs7928060	-4.3	-0.123	0.3556	0.722112
ENSG00000104980.TIMM44	19	7991603	8008805	rs7252142	rs1204494	-3.56	-0.682	0.3542	0.72322
ENSG00000144306.SCRN3	2	175260458	175294303	rs1450043	rs7570614	-7.87	-0.527	0.3498	0.726494
ENSG00000176974.SHMT1	17	18231187	18266856	rs2746027	rs2461838	7.36	-0.517	-0.35	0.72668
ENSG00000086205.FOLH1	11	49168187	49230222	rs1164689	rs660439	4.83	-0.169	-0.3483	0.727618
ENSG00000133313.CNDP2	18	72163051	72188366	rs746232	rs2114230	3.38	0.348	0.348	0.72764
ENSG00000176244.ACBD7	10	15119522	15130775	rs11259458	rs6602809	-3.8	1.243	-0.3478	0.72801
ENSG00000004399.PLXND1	3	129274018	129325661	rs7612530	rs1872113	-3.84	0.347	-0.347	0.728591
ENSG00000153774.CFDP1	16	75327596	75467383	rs247444	rs6564261	3.6	-0.345	-0.345	0.73
ENSG00000163932.PRKCD	3	53190025	53226733	rs6807359	rs12632671	-4.8	0.956	-0.3438	0.730997
ENSG00000123297.TSFM	12	58176372	58201854	rs10783853	rs2072052	-7.22	-0.343	0.343	0.7316
ENSG00000049449.RCN1	11	31833939	32127301	rs224632	rs477838	-3.41	-1.933	0.3391	0.734537
ENSG00000168032.ENTPD3	3	40428647	40470110	rs41485644	rs962847	3.63	-0.339	-0.339	0.73461
ENSG00000152291.TGOLN2	2	85545147	85555548	rs6753357	rs7601117	3.27	0.892	0.339	0.734629
ENSG00000117115.PADI2	1	17393256	17445948	rs2293910	rs12408879	-2.82	-0.318	0.3382	0.73523
ENSG00000168958.MFF	2	228189867	228222550	rs6708202	rs4332918	-4.36	-0.978	0.338	0.735391
ENSG00000095321.CRAT	9	131857089	131873468	rs2287363	rs11564100	-2.77	0.137	-0.3376	0.73567
ENSG00000171298.GAA	17	78075355	78093678	rs2229221	rs12450199	-4.81	-0.039	-0.337	0.73626
ENSG00000125166.GOT2	16	58741035	58768261	rs30823	rs11076262	4.92	-1.516	-0.3365	0.737
ENSG00000108439.PNPO	17	46018872	46025654	rs2074185	rs17617360	-9.26	-0.11	0.332	0.74005
ENSG00000135249.RINT1	7	105172532	105208124	rs7799245	rs6944787	-4.58	0.33	-0.33	0.741
ENSG00000066583.ISOC1	5	128430444	128449721	rs10054567	rs7356681	4.94	-0.48	0.3304	0.7411
ENSG00000142751.GPN2	1	27202624	27216788	rs34889971	rs3170660	-4.66	-0.329	0.329	0.74216
ENSG00000129151.BBOX1	11	27062272	27149356	rs7940358	rs1445325	4.2	0.445	-0.3247	0.745375
ENSG00000151413.NUBPL	14	31959162	32330430	rs10132674	rs10139898	-4.9	0.083	-0.3225	0.74707
ENSG00000108187.PBLD	10	70042417	70092806	rs4525104	rs10762201	6.51	0.153	0.3207	0.74842
ENSG00000150401.DCUN1D2	13	114110134	114145267	rs9549785	rs6577052	-4.54	0.332	-0.3183	0.7503
ENSG00000103642.LACTB	15	63413999	63434260	rs11636105	rs2729835	-8.34	0.427	-0.317	0.75151
ENSG00000006625.GGCT	7	30536237	30591095	rs4722984	rs4260	6.56	0.056	0.31616	0.752
ENSG00000110002.VWA5A	11	123986069	124018428	rs6590039	rs2508888	-5.36	-0.238	0.3138	0.753687
ENSG00000119922.IFIT2	10	91061712	91069033	rs4934464	rs1727	-4.39	-0.676	0.3136	0.75383
ENSG00000164347.GFM2	5	74017029	74063196	rs10058135	rs6453075	8.34	-0.214	-0.3118	0.7552
ENSG00000144036.EXOC6B	2	72403113	73053170	rs7557210	rs17724860	4.57	0.788	0.3112	0.755676
ENSG00000153933.DGKE	17	54911460	54946036	rs12937672	rs11651695	-3.76	0.847	-0.311	0.75613
ENSG00000099968.BCL2L13	22	18111621	18213388	rs5992834	rs5747297	-4.07	0.329	-0.3091	0.757
ENSG00000128595.CALU	7	128379346	128411861	rs10488628	rs339054	4.94	-1.711	-0.30989	0.757
ENSG00000178921.PFAS	17	8150936	8173809	rs3744647	rs11078736	6.02	-0.396	0.308	0.75772
ENSG00000088543.C3orf18	3	50595462	50608458	rs2040397	rs2269505	5.74	0.501	0.3083	0.757867
ENSG00000113272.THG1L	5	157158205	157168456	rs11748404	rs2270818	5.92	-0.036	0.304	0.7611
ENSG00000175193.PARL	3	183547173	183602721	rs262956	rs9290776	-4.44	-0.083	-0.3035	0.761506
ENSG00000205339.IPO7	11	9406169	9469673	rs10770010	rs4910467	-3.67	-0.921	0.3019	0.762737
ENSG00000164535.DAGLB	7	6448757	6523821	rs6962646	rs702485	-5.4	-1.196	0.30142	0.763
ENSG00000116353.MECR	1	29519385	29557454	rs12045750	rs547976	5.97	-0.661	0.3012	0.76323
ENSG00000090863.GLG1	16	74485856	74641012	rs16943885	rs11646445	-3.32	0.133	-0.2944	0.768
ENSG00000112339.HBS1L	6	135281516	135424194	rs11752055	rs4289677	4.83	0.292	0.292	0.77029
ENSG00000160209.PDXK	21	45138975	45182188	rs13052408	rs2838357	-3.39	0.178	-0.291	0.7713
ENSG00000100116.GCAT	22	38203912	38213183	rs17752670	rs5756825	8.21	0.058	-0.2898	0.772
ENSG00000162384.C1orf123	1	53679771	53686289	rs1288347	rs12136837	-3.98	0.147	0.2874	0.7738
ENSG00000116852.KIF21B	1	200938520	200992828	rs12239772	rs296565	4.72	0.408	0.2865	0.77452
ENSG00000241837.ATP5O	21	35275757	35288284	rs3746861	rs13051355	-4.67	0.167	-0.285	0.7758
ENSG00000172456.FGGY	1	59762310	60233347	rs17555959	rs835357	3.64	-1.391	0.2793	0.78001
ENSG00000159784.FAM131B	7	143050493	143059863	rs10257939	rs4236482	-5.68	0.432	0.27789	0.781
ENSG00000170571.EMB	5	49692026	49739082	rs10940335	rs17800685	4.28	-0.275	-0.275	0.7833
ENSG00000184117.NIPSNAP1	22	29950797	29977326	rs11090574	rs467768	-5.51	-0.976	-0.2724	0.785
ENSG00000164167.LSM6	4	147096837	147121152	rs6857756	rs4835286	5.39	0.268	0.2713	0.786
ENSG00000242612.DECR2	16	451826	462487	rs7205963	rs3743890	4.53	-0.267	-0.267	0.789
ENSG00000244731.C4A	6	31949801	31970458	rs4151657	rs1150754	-5.48	-0.938	0.2636	0.79208
ENSG00000143224.PPOX	1	161136200	161147803	rs7512012	rs36013429	-8.08	-0.259	0.259	0.79564
ENSG00000136874.STX17	9	102668915	102732618	rs7022059	rs7026529	-7.5	0.258	-0.258	0.79641
ENSG00000050767.COL23A1	5	177664619	178017556	rs1544928	rs12652833	3.63	-0.433	-0.2576	0.7967
ENSG00000177469.PTRF	17	40554470	40575535	rs36023314	rs9906989	3.07	0.749	0.257	0.7968
ENSG00000148218.ALAD	9	116148597	116163613	rs10817488	rs4979237	3.65	-0.061	0.2567	0.79745
ENSG00000175334.BANF1	11	65769550	65771620	rs2845570	rs754532	3.49	-0.099	-0.256	0.797963
ENSG00000119383.PPP2R4	9	131873229	131911225	rs422134	rs3118634	-6.19	0.548	-0.2553	0.79849
ENSG00000154079.C6orf57	6	71276620	71299272	rs781983	rs6911983	-4.08	1.079	-0.2538	0.79962
ENSG00000106605.BLVRA	7	43798279	43846939	rs10224322	rs10281917	3.48	-0.302	-0.25345	0.8
ENSG00000167578.RAB4B	19	41284121	41302847	rs10411264	rs7251246	4.72	-0.252	-0.252	0.80104
ENSG00000172954.LCLAT1	2	30670092	30867091	rs17009486	rs2602788	-5.91	-0.252	0.252	0.801041
ENSG00000075856.SART3	12	108916357	108955176	rs11113910	rs888555	-4.85	0.248	-0.248	0.80413
ENSG00000087470.DNM1L	12	32832134	32898486	rs4931044	rs977542	-4.95	0.233	-0.2458	0.80582
ENSG00000184227.ACOT1	14	74003818	74010498	rs1540343	rs2041073	-7.15	0.977	-0.2441	0.80714
ENSG00000130653.PNPLA7	9	140354404	140444986	rs11522293	rs2259657	-5.68	0.551	-0.2441	0.80716
ENSG00000182836.PLCXD3	5	41307056	41510730	rs1380996	rs318041	-4.5	-0.132	-0.2424	0.8085
ENSG00000198848.CES1	16	55836763	55867249	rs6499795	rs11860456	5.02	0.159	-0.2417	0.809
ENSG00000137124.ALDH1B1	9	38392661	38398658	rs7867383	rs2073477	-7.44	-0.391	0.2384	0.81154
ENSG00000257727.CNPY2	12	56703626	56710120	rs4759206	rs2371454	5.37	0.058	0.232	0.81651
ENSG00000169567.HINT1	5	130494720	130507428	rs2420148	rs1035440	5.71	0.355	-0.2319	0.8166
ENSG00000087253.LPCAT2	16	55542910	55620582	rs4783897	rs1501995	-3.92	-0.646	-0.232	0.817
ENSG00000115685.PPP1R7	2	242088991	242123067	rs13411510	rs1062748	4.21	0.642	0.2301	0.817991
ENSG00000130479.MAP1S	19	17830051	17845325	rs11879994	rs12979056	-5.82	-0.343	0.2298	0.81825
ENSG00000159445.THEM4	1	151846060	151882284	rs3811414	rs16833668	-8.69	0.188	-0.2274	0.82011
ENSG00000178927.C17orf62	17	80400465	80408705	rs4073961	rs3751913	-4.02	0.361	-0.227	0.82057
ENSG00000171103.TRMT61B	2	29072687	29093167	rs6714085	rs3190	4.37	-1.745	-0.2265	0.820803
ENSG00000185989.RASA3	13	114747194	114898086	rs7338857	rs3812831	-3.62	-0.226	0.226	0.8212
ENSG00000125459.MSTO1	1	155579979	155718153	rs34201109	rs11264380	-4.9	-0.311	0.2257	0.82144
ENSG00000138777.PPA2	4	106290234	106395238	rs34402524	rs2726513	-2.6	0.577	0.2237	0.823
ENSG00000131435.PDLIM4	5	131593364	131609147	rs3805665	rs10463891	7.29	0.09	-0.2227	0.8238
ENSG00000100445.SDR39U1	14	24908972	24912111	rs6573766	rs3742521	-6.12	0.221	-0.2212	0.82497
ENSG00000107021.TBC1D13	9	131549483	131572711	rs3750319	rs15676	4.69	-0.093	-0.2195	0.82624
ENSG00000100994.PYGB	20	25228705	25278650	rs3787081	rs11699316	-3.55	0.459	-0.2191	0.82655
ENSG00000110619.CARS	11	3022152	3078843	rs450208	rs2237903	-3.51	-0.393	0.2191	0.82659
ENSG00000110921.MVK	12	110011060	110035067	rs10161126	rs754179	4.32	-0.219	-0.219	0.82665
ENSG00000112232.KHDRBS2	6	62389865	62996132	rs4710674	rs7758098	-4.09	0.219	-0.219	0.82665
ENSG00000196365.LONP1	19	5691845	5720583	rs2446200	rs3892355	-4.93	-0.106	0.219	0.82666
ENSG00000100938.GMPR2	14	24701628	24708448	rs10583	rs2281704	-3.68	-0.68	-0.2133	0.83107
ENSG00000102781.KATNAL1	13	30776767	30881621	rs9508691	rs17505148	3.98	-0.756	0.2118	0.8323
ENSG00000130429.ARPC1B	7	98971872	98992424	rs10235235	rs917154	-3.22	0.211	-0.211	0.833
ENSG00000077235.GTF3C1	16	27470876	27561234	rs11648096	rs3093367	4.04	0.403	-0.2068	0.836
ENSG00000111696.NT5DC3	12	104164231	104234975	rs4981022	rs9132	-4.85	0.468	0.2068	0.83618
ENSG00000119383.PPP2R4	9	131873229	131911225	rs422134	rs3118634	-7.3	0.548	-0.2067	0.83623
ENSG00000138246.DNAJC13	3	132136370	132257876	rs2310230	rs9289429	3.48	-0.024	-0.2053	0.837328
ENSG00000160703.NLRX1	11	119037277	119054725	rs599385	rs4938637	5.22	-0.885	0.2047	0.837806
ENSG00000138796.HADH	4	108910870	108956331	rs2267842	rs17038253	6.28	0.235	0.2018	0.84
ENSG00000090382.LYZ	12	69742121	69748014	rs7132549	rs2305641	-3.88	-0.372	-0.1975	0.8434
ENSG00000182771.GRID1	10	87359312	88126250	rs17105668	rs6585972	4.21	0.197	0.197	0.84383
ENSG00000148468.FAM171A1	10	15253642	15413061	rs7083529	rs6602828	-6.08	0.529	-0.1962	0.84443
ENSG00000133069.TMCC2	1	205197304	205242471	rs17728	rs17345837	-5	-0.763	0.1962	0.84449
ENSG00000138398.PPIG	2	170440850	170497916	rs13012306	rs2683449	3.73	-0.651	0.1954	0.845109
ENSG00000085719.CPNE3	8	87497059	87573726	rs7832569	rs10100368	-3.79	-0.147	-0.1935	0.847
ENSG00000127022.CANX	5	179105629	179157926	rs4701137	rs13182141	-3.42	0.633	-0.1917	0.848
ENSG00000167136.ENDOG	9	131580753	131584956	rs16930764	rs2997922	-3.55	-0.191	0.191	0.84853
ENSG00000158793.NIT1	1	161087876	161095235	rs7512012	rs4078017	4.48	-0.871	0.1885	0.85047
ENSG00000117899.MESDC2	15	81239667	81282219	rs10220834	rs8026419	3.22	-0.33	-0.184	0.85396
ENSG00000065833.ME1	6	83920108	84140797	rs1171114	rs9350981	3.42	-0.568	0.183	0.85479
ENSG00000135049.AGTPBP1	9	88161455	88356944	rs1447025	rs7850808	-3.66	0.868	-0.1808	0.85654
ENSG00000144827.ABHD10	3	111697857	111712210	rs4682327	rs17491120	-5.08	-0.763	-0.178	0.858761
ENSG00000112186.CAP2	6	17393447	17558023	rs12660395	rs2296249	-4.41	0.176	-0.176	0.86029
ENSG00000124181.PLCG1	20	39765600	39811629	rs8116803	rs753381	6.75	-0.313	-0.1746	0.86139
ENSG00000172349.IL16	15	81451916	81605104	rs7164765	rs11857713	-3.87	-0.878	0.173	0.86249
ENSG00000196154.S100A4	1	153516089	153522612	rs715755	rs28483109	3.86	0.173	0.173	0.86265
ENSG00000107902.LHPP	10	126150403	126306457	rs11819582	rs12269470	-4.12	-0.331	0.1714	0.86387
ENSG00000153048.CARHSP1	16	8946799	8962866	rs4985056	rs2447924	3.13	-0.05	0.1709	0.864
ENSG00000002834.LASP1	17	37026112	37078023	rs226217	rs638366	-3.57	0.198	-0.17	0.86484
ENSG00000100416.TRMU	22	46726772	46753237	rs9306514	rs6008770	-4.04	0.103	-0.1694	0.865
ENSG00000142082.SIRT3	11	215458	236931	rs4758635	rs3782115	-3.34	0.685	0.1693	0.86556
ENSG00000183785.TUBA8	22	18593097	18629321	rs462055	rs464541	-5.56	-0.578	0.1691	0.866
ENSG00000164307.ERAP1	5	96096521	96143803	rs17086651	rs17482078	-8.39	0.204	0.1684	0.8663
ENSG00000136111.TBC1D4	13	75858808	76056250	rs576810	rs9565168	-4.49	-0.168	0.168	0.8666
ENSG00000129009.ISLR	15	74466012	74469213	rs3848159	rs923118	-3.53	-0.433	0.166	0.86788
ENSG00000147419.CCDC25	8	27590835	27630170	rs12542107	rs6992026	4.89	-0.687	-0.1622	0.871
ENSG00000141504.SAT2	17	7529552	7531194	rs6608	rs13894	-7.49	0.668	0.161	0.87222
ENSG00000163219.ARHGAP25	2	68906733	69053965	rs7591722	rs2280244	-8.03	-0.16	0.16	0.872881
ENSG00000114331.ACAP2	3	194995465	195163807	rs7621133	rs9825185	3.45	0.454	-0.1592	0.873494
ENSG00000167434.CA4	17	58227297	58248260	rs9905484	rs9675236	-4.27	0.253	-0.158	0.87419
ENSG00000108272.DHRS11	17	34948228	34957235	rs12453272	rs17619821	-6.5	-0.157	0.157	0.87524
ENSG00000120907.ADRA1A	8	26605667	26724790	rs1036813	rs4236678	4.57	-0.044	-0.1557	0.876
ENSG00000153395.LPCAT1	5	1456595	1524092	rs2963259	rs7737692	-4.02	0.979	-0.1559	0.8761
ENSG00000122335.SERAC1	6	158530536	158589312	rs9459503	rs9365947	3.79	-0.556	0.1512	0.87978
ENSG00000173705.SUSD5	3	33191537	33260707	rs7620019	rs4678506	6.79	0.564	0.1487	0.881756
ENSG00000131504.DIAPH1	5	140894583	140998622	rs11952292	rs6878257	4.31	-0.145	-0.145	0.8847
ENSG00000162407.PPAP2B	1	56960419	57110974	rs6588628	rs9970807	5.07	0.675	0.1424	0.8868
ENSG00000113273.ARSB	5	78073032	78281910	rs163215	rs12522878	-8.58	0.187	-0.1408	0.888
ENSG00000169499.PLEKHA2	8	38758753	38831428	rs3847141	rs4566997	6.67	-0.093	-0.1398	0.889
ENSG00000109854.HTATIP2	11	20385231	20405329	rs16906155	rs7115830	-3.98	0.706	-0.1379	0.890336
ENSG00000164106.SCRG1	4	174305852	174327531	rs4696055	rs7655786	7.64	-0.928	-0.137	0.891
ENSG00000247596.TWF2	3	52262626	52273276	rs1060330	rs352143	-3.84	0.985	-0.1364	0.891539
ENSG00000124767.GLO1	6	38643701	38670917	rs12208880	rs1049346	-4.2	-0.136	0.136	0.89182
ENSG00000104312.RIPK2	8	90769975	90803291	rs11782542	rs39502	-3.91	-0.331	-0.1361	0.892
ENSG00000047932.GOPC	6	117639374	117923691	rs9489215	rs10872153	5.57	0.697	-0.1345	0.89299
ENSG00000137767.SQRDL	15	45923346	45983492	rs16946821	rs1044032	-4.69	-0.134	0.134	0.8934
ENSG00000112584.FAM120B	6	170599791	170716153	rs9348328	rs9366199	-4.97	-0.133	0.1331	0.89414
ENSG00000132002.DNAJB1	19	14625582	14640582	rs2901186	rs8104440	5.06	0.132	0.132	0.89498
ENSG00000137463.MGARP	4	140187317	140201492	rs4306907	rs7690553	3.82	0.437	-0.1323	0.895
ENSG00000008394.MGST1	12	16500076	16762193	rs7303782	rs1114813	-4.03	-0.728	-0.1313	0.89553
ENSG00000153208.MERTK	2	112656056	112787138	rs1548189	rs908518	-4.95	0.338	-0.1302	0.896424
ENSG00000121749.TBC1D15	12	72233487	72320629	rs3741688	rs328761	-4.07	-0.913	0.1299	0.89667
ENSG00000117305.HMGCL	1	24128375	24165110	rs2235541	rs11591202	6.34	0.129	0.129	0.89736
ENSG00000133059.DSTYK	1	205111632	205180727	rs17728	rs10793725	-3.76	1.656	0.127	0.89898
ENSG00000168952.STXBP6	14	25278862	25519503	rs8021822	rs17109350	5.39	0.464	-0.1261	0.89967
ENSG00000133706.LARS	5	145492601	145562223	rs10491263	rs13180255	-4.1	-0.306	0.1261	0.8997
ENSG00000242110.AMACR	5	33986283	34008220	rs10461928	rs2287939	-7.32	0.177	-0.1248	0.9007
ENSG00000148158.SNX30	9	115513118	115643951	rs786990	rs2173193	-3.28	0.511	0.1238	0.90148
ENSG00000141698.NT5C3B	17	39981335	39992523	rs4796691	rs4796714	7.79	0.121	0.121	0.90369
ENSG00000155903.RASA2	3	141205889	141334184	rs10935431	rs720663	-3.91	0.219	-0.1202	0.904326
ENSG00000114698.PLSCR4	3	145910126	145968966	rs7645100	rs3762685	7.17	0.119	0.119	0.905275
ENSG00000163864.NMNAT3	3	139279022	139396859	rs9822458	rs16849307	-4.35	-0.791	0.1156	0.907985
ENSG00000213965.NUDT19	19	33182867	33204702	rs1827700	rs12610342	-8.64	0.422	-0.1146	0.9088
ENSG00000083067.TRPM3	9	73143979	74061820	rs1106948	rs4620343	6.52	-0.114	-0.114	0.90924
ENSG00000104524.PYCRL	8	144686083	144691943	rs10100154	rs12546272	5.37	-0.414	0.1125	0.91
ENSG00000145050.MANF	3	51422478	51426828	rs11715034	rs1552074	-4.75	0.112	-0.112	0.910823
ENSG00000124164.VAPB	20	56964178	57026157	rs2208087	rs2268924	4.74	0.671	0.1113	0.91134
ENSG00000197798.FAM118B	11	126081309	126132881	rs522486	rs580145	-3.45	0.406	0.1101	0.912303
ENSG00000205765.C5orf51	5	41904290	41921738	rs2011105	rs10064298	-2.93	0.081	0.1097	0.9127
ENSG00000198721.ECI2	6	4115923	4135831	rs9392560	rs1815510	-6.91	-0.439	0.1091	0.9131
ENSG00000178053.MLF1	3	158288952	158325041	rs1714522	rs7631310	-4.44	-0.045	-0.1091	0.913106
ENSG00000129003.VPS13C	15	62144588	62352672	rs4359383	rs1046156	4.31	0.663	0.107	0.91502
ENSG00000143337.TOR1AIP1	1	179851177	179894135	rs1281424	rs1300068	7.8	0.106	0.106	0.91558
ENSG00000158716.DUSP23	1	159750722	159752333	rs2494493	rs1129923	-8.11	-0.11	0.105	0.91641
ENSG00000152778.IFIT5	10	91174343	91180758	rs6586196	rs304411	-5.34	-0.078	0.1042	0.91699
ENSG00000102967.DHODH	16	72042487	72058954	rs16973520	rs1424241	-5.04	0.574	-0.1042	0.917
ENSG00000198585.NUDT16	3	131100515	131107674	rs17275526	rs16836493	-3.26	-0.125	-0.104	0.917135
ENSG00000204851.PNMAL2	19	46990163	46999755	rs4803941	rs4803967	-5.85	-0.104	0.104	0.91717
ENSG00000116299.KIAA1324	1	109656301	109749401	rs17034458	rs12239854	-4.28	-0.103	0.103	0.91796
ENSG00000024422.EHD2	19	48216600	48246391	rs4802383	rs2974211	3.95	0.102	0.102	0.91876
ENSG00000100612.DHRS7	14	60610838	60636574	rs10151922	rs441282	-5.45	0.665	-0.1005	0.91992
ENSG00000138744.NAAA	4	76831809	76862204	rs9784511	rs884304	-3.96	-0.101	0.101	0.92
ENSG00000105127.AKAP8	19	15464196	15490609	rs4264508	rs7247749	5.17	0.328	0.1004	0.92006
ENSG00000075234.TTC38	22	46663858	46689905	rs881740	rs9627287	5.41	0.434	-0.0974	0.922
ENSG00000164530.PI16	6	36922209	36932613	rs4348312	rs7740320	-4.49	0.231	-0.0972	0.92256
ENSG00000188997.KCTD21	11	77882295	77899868	rs1981405	rs572693	-5.69	0.283	0.0963	0.92332
ENSG00000140983.RHOT2	16	718086	724174	rs12443803	rs3752493	-7.79	0.083	0.0956	0.924
ENSG00000137364.TPMT	6	18128542	18155305	rs4507599	rs7764074	-5	1.442	-0.0937	0.92537
ENSG00000105650.PDE4C	19	18318771	18366229	rs11667487	rs172043	4.08	-0.183	0.0933	0.92566
ENSG00000173540.GMPPB	3	49754277	49761384	rs4283605	rs6809879	7.03	-0.093	-0.093	0.925904
ENSG00000134569.LRP4	11	46878419	46940193	rs12277006	rs11039024	4.27	0.184	-0.0919	0.926815
ENSG00000075303.SLC25A40	7	87462883	87505672	rs34221278	rs10227951	-4.42	-0.091	0.091	0.927
ENSG00000113048.MRPS27	5	71515236	71616473	rs13153166	rs6831	3.66	0.237	-0.0894	0.9288
ENSG00000152642.GPD1L	3	32147181	32210205	rs6550108	rs11922715	4.94	1.29	-0.0852	0.932128
ENSG00000164983.TMEM65	8	125324231	125384933	rs6990925	rs11992924	3.2	0.458	0.0844	0.933
ENSG00000112667.DNPH1	6	43193367	43197222	rs2756173	rs7832	-3.81	0.197	0.0832	0.93372
ENSG00000143337.TOR1AIP1	1	179851177	179894135	rs1281424	rs1300068	-4.62	0.106	-0.083	0.93387
ENSG00000184207.PGP	16	2261998	2264808	rs36232	rs3160	3.71	-1.53	-0.0815	0.935
ENSG00000162433.AK4	1	65613232	65697828	rs6696692	rs10749750	4.06	0.0805	0.0805	0.93583
ENSG00000187955.COL14A1	8	121072019	121384275	rs12541735	rs17823756	3.99	0.078	-0.0764	0.939
ENSG00000111912.NCOA7	6	126102307	126252266	rs9388462	rs1407590	3.28	-2.149	-0.075	0.94019
ENSG00000091972.CD200	3	112051194	112081659	rs1032239	rs7647411	-9.09	-0.075	0.075	0.940215
ENSG00000119899.SLC17A5	6	74303102	74363878	rs9352023	rs583443	3.84	0.073	0.073	0.94181
ENSG00000157184.CPT2	1	53662101	53679869	rs1288347	rs11578832	-9.37	0.072	-0.072	0.9426
ENSG00000188897.CTD-3088G3.8	16	11453702	11617444	rs7191700	rs4628985	-3.23	1.017	0.0709	0.944
ENSG00000155660.PDIA4	7	148700154	148725733	rs1405123	rs10272564	6.43	0.069	0.069	0.945
ENSG00000119640.ACYP1	14	75519924	75536186	rs17493927	rs10136948	5.6	-0.067	-0.067	0.94658
ENSG00000132541.HRSP12	8	99114572	99129469	rs16896768	rs2514334	-6.27	-0.067	0.067	0.947
ENSG00000259431.THTPA	14	24025216	24029480	rs7145877	rs12886523	-4.52	0.268	-0.0657	0.94763
ENSG00000155158.TTC39B	9	15163620	15307358	rs12554907	rs2800572	3.53	0.367	0.0642	0.94877
ENSG00000057252.SOAT1	1	179262925	179327815	rs2492778	rs10913733	-4.67	-0.064	0.064	0.94897
ENSG00000144559.TAMM41	3	11831916	11888393	rs389780	rs303854	-7.88	-0.267	0.062	0.950558
ENSG00000107819.SFXN3	10	102790991	102800998	rs807028	rs7099531	-4.67	-0.228	0.0589	0.95304
ENSG00000135469.COQ10A	12	56660642	56664750	rs773662	rs2371454	3.56	0.058	0.058	0.95375
ENSG00000157500.APPL1	3	57261765	57307496	rs4681960	rs11710045	3.51	0.823	0.0579	0.95379
ENSG00000125779.PANK2	20	3869486	3907605	rs910655	rs14161	4.29	-0.049	-0.049	0.96092
ENSG00000138792.ENPEP	4	111286889	111486441	rs2595110	rs13151867	-4.36	-0.19	-0.0492	0.961
ENSG00000132692.BCAN	1	156611182	156629324	rs12724719	rs3795736	-4.4	0.257	0.0481	0.96162
ENSG00000151131.C12orf45	12	105380088	105443515	rs1196814	rs1129593	-4.09	0.402	-0.0466	0.96284
ENSG00000025708.TYMP	22	50964181	50968485	rs6151429	rs134975	-3.27	-1.088	0.0449	0.964
ENSG00000136783.NIPSNAP3A	9	107509969	107522403	rs4149339	rs10820722	5.06	0.043	0.043	0.9657
ENSG00000131323.TRAF3	14	103243813	103377837	rs10138062	rs941726	4.41	-0.041	-0.041	0.9673
ENSG00000063854.HAGH	16	1845621	1877195	rs173164	rs10500323	5.75	-0.526	0.0401	0.968
ENSG00000124299.PEPD	19	33877856	34012700	rs4805902	rs8111294	4.74	0.991	-0.0395	0.96849
ENSG00000187902.SHISA7	19	55940107	55954230	rs4075908	rs1042506	-3.93	-0.446	-0.0386	0.96923
ENSG00000198836.OPA1	3	193310933	193415612	rs6763744	rs1489927	5.75	-0.312	-0.0385	0.969269
ENSG00000155792.DEPTOR	8	120885957	121063152	rs7833407	rs4871822	4.68	-0.038	-0.038	0.97
ENSG00000100577.GSTZ1	14	77787227	77797940	rs8012228	rs2363641	8.4	-0.162	-0.0362	0.97116
ENSG00000119917.IFIT3	10	91087651	91100728	rs4934464	rs1412444	-3.41	0.797	-0.0355	0.97164
ENSG00000114021.NIT2	3	100053545	100075710	rs2316701	rs2289506	-10.32	0.07	-0.0311	0.975153
ENSG00000110025.SNX15	11	64794880	64808044	rs733303	rs566908	3.85	-0.495	0.03	0.976061
ENSG00000150540.HNMT	2	138721590	138773930	rs10432379	rs3100720	-5.54	-0.422	0.0286	0.97718
ENSG00000172031.EPHX4	1	92495539	92529093	rs7549306	rs2391112	-3.56	1.109	-0.0276	0.97795
ENSG00000160439.RDH13	19	55550476	55582659	rs1654467	rs3745913	-4.83	-0.199	0.0244	0.98052
ENSG00000213995.CARKD	13	111267881	111292340	rs9559849	rs2765341	7.97	-0.076	0.0228	0.9818
ENSG00000101146.RAE1	20	55926066	55954267	rs4810073	rs2426714	-3.09	-2.161	-0.0206	0.98356
ENSG00000143549.TPM3	1	154127784	154167124	rs2274993	rs4845364	6.44	0.061	-0.0199	0.98409
ENSG00000164081.TEX264	3	51696709	51738339	rs11130296	rs11919197	3.27	0.019	0.019	0.984841
ENSG00000097007.ABL1	9	133589333	133763062	rs7862053	rs2696141	4.88	0.018	0.018	0.98564
ENSG00000124222.STX16	20	57226328	57254582	rs6070505	rs6128396	4.35	0.485	-0.0177	0.98585
ENSG00000146416.AIG1	6	143381633	143661441	rs199243	rs2303386	-3.15	1.283	0.0174	0.98609
ENSG00000196975.ANXA4	2	69871557	70053596	rs12478160	rs6720498	-4.43	0.253	-0.0161	0.987166
ENSG00000153113.CAST	5	95860971	96115299	rs17086651	rs152005	5.14	0.016	0.016	0.9872
ENSG00000166780.C16orf45	16	15528152	15718885	rs4781669	rs7206272	-3.3	-0.48	0.0151	0.988
ENSG00000120451.SNX19	11	130745331	130786404	rs6590509	rs7111478	-3.58	1.175	-0.0134	0.989313
ENSG00000107669.ATE1	10	123499939	123688316	rs2935715	rs10788213	4.31	0.607	0.0133	0.98941
ENSG00000064607.SUGP2	19	19101697	19144832	rs4808874	rs12979565	5.03	0.013	0.013	0.98963
ENSG00000070540.WIPI1	17	66417089	66453654	rs17774757	rs2952289	-4.21	-0.012	0.012	0.99043
ENSG00000107719.PALD1	10	72238577	72328205	rs7914811	rs7100295	3.52	0.763	-0.0109	0.9913
ENSG00000183828.NUDT14	14	105639275	105647660	rs10149501	rs11625865	-5.65	-0.008	0.008	0.99362
ENSG00000105447.GRWD1	19	48949030	48960279	rs12611321	rs1643494	-3.62	-0.368	-0.0073	0.99417
ENSG00000184584.TMEM173	5	138855119	138862520	rs28419191	rs7380824	-4.69	-0.004	0.004	0.9968
ENSG00000157954.WIPI2	7	5229819	5273457	rs4236378	rs12472	-3.85	0.776	-0.00143	0.999
ENSG00000011052.NME2	17	49230951	49249105	rs41524846	rs12937424	4.21	0	0	1
ENSG00000203896.LIME1	20	62366815	62370456	rs6062484	rs2297441	-4	0	0	1
ENSG00000167861.HID1	17	72946838	72969261	NA	NA	NA	NA	NA	NA
ENSG00000006607.FARP2	2	242295658	242434256	NA	NA	NA	NA	NA	NA
ENSG00000168393.DTYMK	2	242615157	242626406	NA	NA	NA	NA	NA	NA
ENSG00000180902.D2HGDH	2	242673994	242708231	NA	NA	NA	NA	NA	NA
ENSG00000176946.THAP4	2	242523820	242576864	NA	NA	NA	NA	NA	NA
ENSG00000168397.ATG4B	2	242576628	242613272	NA	NA	NA	NA	NA	NA
ENSG00000113552.GNPDA1	5	141371314	141392606	NA	NA	NA	NA	NA	NA
ENSG00000145692.BHMT	5	78407602	78428108	NA	NA	NA	NA	NA	NA
