# Supplementary material for: Joint analysis of proteome, transcriptome, and multi-trait analysis to identify novel Parkinson’s disease risk genes
Source: Aging (Albany NY). 2024 Jan 17;16(2):1555–80. doi: 10.18632/aging.205444 (PMC10866412; doi:10.18632/aging.205444)
Supplement: Supplementary Table 5 [file aging-16-205444-s005.xlsx]

## Sheet: Additional file4(Table S3)
Supplementary Tabel 5. The PWAS of PD integrating the plasma proteomes with the PD GWAS.
ID	CHR	P0	P1	HSQ	BEST.GWAS.ID	PQTL.ID	PQTL.R2	PQTL.Z	PQTL.GWAS.Z	PWAS.Z	PWAS.P
BST1	4	15704688	15739936	0.29954	rs4613561	rs6842052	0.392827	-53.28	-3.486	5.51182	3.55e-08
CTSB	8	11700033	11727042	0.26132	rs1293327	rs1736081	0.205617	38.57	-3.847	-4.6413	3.46e-06
PRSS8	16	31142754	31147048	0.01243	rs889555	rs1060506	0.00544	6.81	-4.453	-4.453	8.47e-06
FCGR2A	1	161475220	161493803	0.44351	rs4657041	rs1801274	0.487	59.25	4.087	4.15763	3.22e-05
EFNA4	1	155036213	155042029	0.01414	rs3806256	rs3806256	0.00365	6.1	-3.883	-3.883	0.000103
ASF1A	6	119215316	119230336	0.00695	rs4946366	rs4946366	0.00399	6.03	3.577	3.577	0.000348
FGFR1	8	38257733	38326352	0.03695	rs74610247	rs11997244	0.007566	-8.88	-1.852	3.4774	0.000506
FCGR2B	1	161632937	161648444	0.44673	rs4657041	rs6665610	0.39	53.04	2.3812	3.32315	0.00089
GPNMB	7	23275586	23314727	0.17268	rs6461685	rs2268748	0.036597	16.29	0.546	3.2937	0.000989
TREML2	6	41157487	41168887	0.18912	rs17643398	rs4714431	0.11822	29.23	2.951	3.2581	0.001121
FGFR3	4	1795020	1810599	0.11668	rs188657131	rs79825628	0.03711	17.01	1.808	3.20739	0.00134
PGD	1	10458649	10480568	0.02891	rs2229688	rs111782199	0.0337	-15.77	-3.202	3.202	0.00136
GGH	8	63927440	63951966	0.14682	rs191474837	rs4739037	0.099957	27.29	2.218	3.1823	0.00146
GRN	17	42422614	42430474	0.0453	rs850733	rs5848	0.0249	-13.49	2.584	-3.12185	0.0018
FAF2	5	175874629	175937075	0.00325	rs1366240	rs1366240	0.000173	4.17	2.775	3.07215	0.00213
CNTN2	1	205012065	205047417	0.34906	rs1572995	rs3753847	0.188	-36.86	-2.79	3.05652	0.00224
FAHD1	16	1876942	1890208	0.01395	rs1630381	rs3743853	0.02801	-14.41	-3.055	3.055	0.00225
NCR1	19	55417506	55427508	0.06361	rs76088660	rs2915993	0.011829	-10.48	1.601	-3.0449	0.00233
HP		72088404	72094954	0.29605	rs2000999	rs11648003	0.08588	-26.07	-2.513	3.0217	0.00251
HP	16	72088404	72094954	0.41047	rs71386950	rs77303550	0.1425	32.11	2.181	3.0157	0.00256
FER	5	108083542	108532542	0.03782	rs6880917	rs79536589	0.0197	12.42	1.71	2.87351	0.00406
TPP1	11	6633999	6640679	0.06889	rs35706972	rs11040938	0.025115	13.52	1.141	2.84098	0.0045
SERPINE2	2	224839762	224904035	0.48586	rs112507553	rs13412535	0.31113	-47.41	2.482	-2.8097	0.00496
HAVCR2	5	156512843	156569880	0.34797	rs9790947	rs1432872	0.274	-44.54	3.594	-2.76872	0.00563
ASIP	20	32782375	32857150	0.11394	rs6059655	rs6059655	0.128414	-30.46	2.864	-2.76168	0.00575
ICAM1	19	10381769	10397291	0.39829	rs3093030	rs5498	0.515609	-60.99	2.893	-2.7513	0.00594
CD68	17	7482809	7485429	0.06969	rs62059826	rs9901673	0.094	26.18	2.594	2.74759	0.006
EPHA5	4	66185281	66536213	0.04873	rs62297735	rs28542715	0.017039	12.72	2.303	2.74602	0.00603
GPNMB	7	23275586	23314727	0.15426	rs10250602	rs28458177	0.042565	-17.6	-5.194	2.68	0.007362
LILRA4	19	54844456	54850433	0.21418	rs7256494	rs12976217	0.07329	23.25	-2.374	-2.6743	0.00749
IDUA	4	980785	998352	0.44614	rs34311866	rs3796622	0.177052	35.77	-2.843	-2.65278	0.00798
PCDH9	13	66876966	67804577	0.04198	rs4356361	rs4884685	0.00483	-7.32	0.905	-2.6188	0.00882
NOV	8	120428686	120436674	0.01813	rs7844871	rs17793097	0.011459	9.81	-2.038	-2.5989	0.00935
PDCD1LG2	9	5510531	5571282	0.2984	rs10975138	rs16923189	0.19427	37.44	-2.247	-2.5658	0.0103
HRG	3	186378005	186396023	0.31933	rs60693099	rs60531302	0.277	43.88	-2.666	-2.54699	0.0109
HEXIM1	17	43225842	43229466	0.02004	rs72832877	rs12051846	0.0156	11.01	1.08	2.54512	0.0109
PLAU	10	75668935	75677254	0.26072	rs11000850	rs2633322	0.062128	-21.91	1.753	-2.5369	0.0112
EGF	4	110834039	110934922	0.05944	rs2298977	rs10029654	0.064586	21.75	-2.429	-2.53034	0.0114
GOLM1	9	88641061	88715088	0.07783	rs7021733	rs138447426	0.04061	18.04	-1.358	-2.52332	0.0116
RSPO1	1	38076951	38100564	0.07475	rs36043533	rs36043533	0.0558	20.11	2.674	2.51585	0.0119
APOC3	11	116700422	116703788	0.01383	rs3741298	rs5141	0.003457	-6.93	-0.891	2.51144	0.012
LMAN2	5	176758568	176778669	0.05878	rs6882591	rs35582636	0.00311	6.65	-1.232	-2.50834	0.01213
FAM171B	2	187558787	187630686	0.03568	rs141762935	rs12621915	0.02092	-12.37	-1.241	2.4692	0.01354
OVCA2	17	1945316	1946719	0.16487	rs76439887	rs145234879	0.0545	20	1.641	2.45743	0.014
RAB6B	3	133543079	133614726	0.11873	rs12492380	rs9813363	0.125	-30.29	2.677	-2.44148	0.0146
TNFSF8	9	117655623	117692875	0.03383	rs7875178	rs3181348	0.02795	-14.53	-1.762	2.44151	0.0146
IL22RA2	6	137464957	137494785	0.04763	rs41288975	rs6917836	0.00776	-8.28	1.224	-2.4381	0.014764
NUCB1	19	49403569	49426629	0.04165	rs4802522	rs28450126	0.031031	-15.1	1.847	-2.4364	0.01483
ICAM5	19	10400628	10407454	0.3079	rs45524632	rs281440	0.228089	40.6	1.632	2.4049	0.01618
GOLM1	9	88641061	88715088	0.04087	rs7021733	rs138447426	0.0181	11.59	-1.358	-2.39257	0.0167
PFKM	12	48498922	48540187	0.00611	rs11608863	rs3742074	0.003959	6.37	-0.392	-2.3808	0.0173
ICAM5	19	10400628	10407454	0.28356	rs45524632	rs281440	0.218619	39.75	1.632	2.3485	0.01885
GUSB	7	65425671	65447202	0.05011	rs189264442	rs2949690	0.013504	-10.62	1.91	-2.3265	0.019991
FKBP1B	2	24272571	24286551	0.08239	rs116779537	rs72781698	0.13115	-30.89	-2.201	2.3168	0.02052
HDHD2	18	44633779	44676871	0.17178	rs79420880	rs79231363	0.184184	36.68	2.369	2.31	0.0209
COLEC11	2	3642422	3692234	0.28181	rs10197139	rs6542680	0.13339	-31.11	-2.298	2.3083	0.02098
MXRA7	17	74668633	74707086	0.14886	rs79193652	rs4789345	0.113	28.82	-2.387	-2.30721	0.021
ALPPL2	2	233271554	233275424	0.00999	rs12478529	rs35458538	0.0059	7.04	-2.3057	-2.3057	0.02113
NOTUM	17	79910383	79919716	0.01281	rs35290415	rs111343749	0.00285	-6.6	-0.261	2.30096	0.0214
CSF1R	5	149432854	149492935	0.10384	rs147590244	rs572474264	0.021	-12.51	0.255	-2.29987	0.02146
WARS	14	100800127	100843142	0.0749	rs6575763	rs4905957	0.148254	32.72	2.296	2.296	0.0217
EPHA10	1	38179552	38230805	0.02052	rs150763550	rs12074120	0.00785	8.57	-2.6674	-2.29201	0.0219
RAB21	12	72148643	72194066	0.0196	rs117339008	rs2864808	0.007437	-8.81	1.353	-2.2671	0.0234
AGO3	1	36396319	36538101	0.00425	rs149430726	rs139140696	-2.03e-05	-3.39	-2.087	2.24922	0.0245
PYY	17	42030106	42081837	0.00988	rs72822645	rs12449853	0.0049	6.62	2.246	2.246	0.0247
TBL2	7	72981867	72993121	0.04047	rs799301	rs73134986	0.013668	10.12	-1.839	-2.2416	0.024985
CREG1	1	167498354	167523042	0.05114	rs7513428	rs7513428	0.0285	-14.37	2.623	-2.24192	0.025
ALPP	2	233243434	233247599	0.13737	rs35458538	rs35458538	0.05541	20.1	-2.2564	-2.2299	0.02575
CXCL11	4	76954835	76962568	0.02849	rs13111888	rs6827617	0.015654	-11.29	0.588	-2.22989	0.0258
CCL15	17	34323476	34328592	0.19092	rs111564571	rs854624	0.286	45.51	-2.177	-2.22402	0.0261
ALPPL2	2	233271554	233275424	0.0988	rs35458538	rs35458538	0.03769	16.62	-2.2396	-2.2238	0.02616
ITPA	20	3189514	3204516	0.42794	rs2295548	rs67002563	0.251905	-42.75	0.442	-2.2167	0.02664
ENPP5	6	46126922	46138717	0.33537	rs4331969	rs1047153	0.29297	-46	2.928	-2.2016	0.027697
NAGLU	17	40688259	40696467	0.17773	rs4793099	rs41283429	0.0969	26.5	0.898	2.19541	0.0281
SAA4	11	18252902	18258349	0.39314	rs140688939	rs4757628	0.164993	-35.62	1.114	-2.18173	0.0291
PLXNB2	22	50713408	50746075	0.28398	rs118013066	rs28573806	0.201995	38.26	2.35	2.1671	0.0302
FBLN1	22	45898118	45997015	0.07769	rs6007075	rs11090631	0.035791	-16.25	1.411	-2.1477	0.0317
ITIH5	10	7601232	7708961	0.28404	rs10795588	rs6602258	0.069294	22.46	-0.69	-2.1422	0.0322
EPHA1	7	143087382	143105949	0.34127	rs149061301	rs4421280	0.288917	45.66	2.347	2.1395	0.032392
MAP3K3	17	61699775	61773665	0.00302	rs8070334	rs9890263	0.000625	-4.01	-2.14	2.14	0.0324
TIE1	1	43766653	43788779	0.02963	rs999288	rs1556580	0.0287	15.13	-2.262	-2.12862	0.0333
TREM2	6	41126244	41130924	0.10774	rs4711657	rs143332484	0.04849	-18.74	1.3704	-2.1254	0.033552
LDHA	11	18416107	18429972	0.01466	rs55889548	rs7112492	0.009599	-8.73	-0.97	2.12537	0.0336
PTGR1	9	114312002	114362173	0.28758	rs77083817	rs7036102	0.09922	28.27	-2.846	-2.1191	0.0341
TRIL	7	28992974	28997946	0.03246	rs221136	rs740250	0.018422	-12	1.724	-2.1184	0.034144
FSTL1	3	120111140	120169840	0.03726	rs139581251	rs916510	0.0106	-9.03	0.685	-2.1053	0.0353
DARS	2	136663451	136743670	0.03262	rs3112496	rs2304371	0.04806	-19.25	1.9678	-2.0972	0.03597
ESM1	5	54273695	54318499	0.05286	rs115600713	rs4242051	0.012	9.41	-1.938	-2.07811	0.0377
AKR7A2	1	19630459	19638638	0.33359	rs149586452	rs11800204	0.0439	-18.34	-1.193	2.07684	0.0378
IBSP	4	88720706	88733587	0.01374	rs190570172	rs2616262	0.006083	-7.02	1.529	-2.07595	0.0379
AMIGO2	12	47469490	47473742	0.03169	rs12827531	rs1101751	0.008281	-8.21	-0.101	2.076	0.0379
ADPRHL2	1	36554493	36559533	0.01837	rs151109663	rs58350664	0.00172	5.19	1.024	2.07497	0.038
APRT	16	88875747	88878345	0.01993	rs12596224	rs535070	0.00051	-6.28	1.622	-2.0748	0.038
BPIFB1	20	31861286	31897677	0.06088	rs141890296	rs2424963	0.047786	-18.88	1.477	-2.06297	0.03912
DNAJB4	1	78444859	78483648	0.08837	rs7514180	rs7514180	0.0396	-17.17	3.366	-2.05833	0.0396
LIPN	10	90519739	90539383	0.21984	rs10788612	rs10509554	0.276844	44.7	1.091	2.0529	0.0401
FASN	17	80036214	80056170	0.0082	rs72634334	rs62078746	0.0135	-10.88	-1.776	2.04715	0.0406
DSG2	18	29078140	29128971	0.12695	rs1667232	rs1460602	0.057265	-20.58	1.158	-2.048	0.0406
ZADH2	18	72907068	72921094	0.01927	rs7230037	rs12969004	0.010975	-9.78	1.585	-2.04	0.0413
SCARA5	8	27727400	27850190	0.05125	rs2614082	rs2685422	0.024653	-13.79	2.299	-2.0383	0.0415
CCDC50	3	191046874	191116448	0.01631	rs75156294	rs147604673	0.00938	-8.6	-2.034	2.034	0.042
FLRT2	14	85996488	86120772	0.11287	rs1480407	rs17796783	0.118124	-29.24	-1.561	2.03192	0.0422
ANXA11	10	81910645	81965328	0.31245	rs2819875	rs2819952	0.190279	37.17	2.214	2.027	0.0427
CTSS	1	150702555	150738433	0.2077	rs9733	rs41271951	0.168	-34.81	0.964	-2.01844	0.0435
BPNT1	1	220230824	220263804	0.02611	rs115266541	rs7530481	0.0224	-12.83	-1.4426	2.01672	0.0437
GPT	8	145728356	145732557	0.01142	rs2306386	rs4244610	0.007822	-8.28	-1.817	2.0166	0.0437
CD48	1	160648536	160681621	0.1763	rs3737791	rs352684	0.0578	20.98	1.532	2.01641	0.0438
CXCL10	4	76942271	76944650	0.0075	rs13111888	rs151000561	0.000494	5.94	2.39974	2.00324	0.0452
FAM19A5	22	48885365	49246724	0.01624	rs2071783	rs5768649	0.001842	-6.42	2.275	-1.9897	0.0466
CDHR5	11	616577	626078	0.02256	rs111368715	rs7108757	0.014275	10.59	1.224	1.98876	0.0467
CSK	15	75074421	75095538	0.0857	rs11072506	rs34933034	0.06048	21.89	-1.715	-1.9884	0.0468
IL16	15	81451916	81606399	0.27742	rs72748437	rs4778639	0.28643	-45.64	-1.889	1.9727	0.0485
SELPLG	12	109015671	109027670	0.06039	rs146070136	rs73191242	0.038126	-16.62	1.058	-1.9688	0.049
GPD1	12	50497765	50505096	0.04932	rs115314870	rs75732302	0.003378	-6.28	0.00957	1.9661	0.0493
ANTXR2	4	80822300	81046608	0.06734	rs79678097	rs10010217	0.047723	19.9	0.599	1.96285	0.0497
PIN1	19	9945933	9960365	0.01415	rs11669872	rs730554	0.001159	-5.1	1.379	-1.9622	0.04974
LGALS3	14	55590828	55612141	0.05297	rs2075603	rs118083722	0.103074	-27.48	-1.335	1.96107	0.0499
PDHX	11	34937376	35042138	0.07716	rs2956092	rs2915221	0.046208	-18.83	2.614	-1.9588	0.0501
ROR2	9	94325373	94712510	0.12891	rs7869182	rs10118816	0.04988	19.16	0.619	1.91668	0.0553
GALNT13	2	154728435	155310491	0.01176	rs67335822	rs67335822	0.00421	6.37	-1.91	-1.91	0.05613
KLK10	19	51515995	51523431	0.31779	rs75550672	rs2569454	0.210947	39.05	0.8056	1.9098	0.05616
NT5C3A	7	33053742	33102408	0.03032	rs10951381	rs12155117	0.013747	-10.32	1.522	-1.9093	0.056218
CLEC3B	3	45043040	45077563	0.10929	rs74341405	rs10865936	0.043	-17.75	-1.98	1.90215	0.0572
TXNDC15	5	134210061	134237325	0.05044	rs12656013	rs3733897	0.052	19.41	-2.319	-1.89571	0.058
ACADVL	17	7120444	7128585	0.0055	rs507506	rs446994	0.0023	-5.73	1.884	-1.884	0.0596
GLCE	15	69452923	69564556	0.16687	rs11854180	rs3865014	0.24089	41.79	2.24	1.8803	0.0601
GSTA1	6	52656169	52668658	0.1122	rs1009062	rs4715316	0.26096	43.6	-1.756	-1.8785	0.06031
PAM	5	102089685	102365434	0.5164	rs17296280	rs3733939	0.129	-32.5	-2.439	1.87694	0.06053
ISG15	1	936518	949920	0.24089	rs2465126	rs3121574	0.0378	17.82	1.097	1.85481	0.0636
GM2A	5	150591711	150650001	0.25278	rs62379735	rs72794132	0.124	31.46	0.103	1.85436	0.06369
ANXA7	10	75134859	75173834	0.15699	rs74629413	rs76150063	0.00791	-7.73	2.188	-1.8546	0.0637
TAPBP	6	33267471	33282164	0.33074	rs144706539	rs1014779	0.09983	-27.11	0.636	-1.8423	0.065427
B4GALT7	5	177027133	177037331	0.02674	rs968405	rs59621415	0.0165	11.35	-0.903	-1.83566	0.06641
IDI2	10	1064850	1071799	0.04554	rs12415759	rs1044261	0.04325	-17.74	-1.155	1.8328	0.0668
TAPBPL	12	6560856	6575683	0.29285	rs12964	rs2534709	0.485497	59.27	-1.457	-1.8247	0.068
FGF7	15	49715434	49780972	0.09684	rs118020827	rs7161744	0.01258	-10.97	1.326	-1.8214	0.0686
RGS10	10	121259329	121302231	0.01567	rs7071131	rs61874690	0.001397	5.39	1.44	1.8147	0.0696
STX18	4	4417469	4544073	0.00587	rs1000579	rs1000579	0.000137	-4.02	1.814	-1.814	0.0697
RBP1	3	139236276	139258671	0.01923	rs2071387	rs2071387	0.0109	9.37	-1.82	-1.81096	0.0701
MPO	17	56347216	56358296	0.12069	rs76774678	rs75394768	0.0299	-15.37	1.661	-1.80025	0.0718
CHST4	16	71559136	71572651	0.04806	rs3213422	rs16973264	0.01695	11.22	-0.916	-1.7989	0.072
TNFRSF21	6	47199268	47277641	0.10755	rs11758388	rs6458555	0.03594	16.25	-0.181	1.7991	0.072006
BMP1	8	22022653	22069839	0.02845	rs2086836	rs1126931	0.008018	-8.93	-1.296	1.7986	0.0721
HMHA1	19	1065922	1086627	0.05755	rs7251797	rs2240051	0.051829	20.31	-1.938	-1.7886	0.07369
TMEM132C	12	128751715	129192456	0.06958	rs7973997	rs9669390	0.048105	-18.67	1.844	-1.7869	0.0739
CFI	4	110661850	110723155	0.12491	rs7659870	rs7439493	0.066968	22.03	-1.663	-1.78609	0.0741
MMP2	16	55423612	55540603	0.01655	rs1486743	rs171497	0.00595	-6.83	1.784	-1.784	0.0744
HS6ST3	13	96742361	97491816	0.00977	rs12430692	rs12860877	0.00656	7.68	1.883	1.7819	0.07477
FHIT	3	59733003	61237133	0.01434	rs1038518	rs13070475	0.01	8.93	1.814	1.78113	0.0749
TP53I3	2	24300303	24308731	0.23754	rs573657367	rs10191964	0.26518	-43.86	1.797	-1.7801	0.07506
CPB1	3	148508889	148577974	0.13106	rs41267865	rs13318853	0.0591	20.72	-1.423	-1.77619	0.0757
C1QTNF5	11	119209652	119211650	0.04326	rs948412	rs2509656	0.013078	10.8	1.43	1.76734	0.0772
SPINK4	9	33218363	33248565	0.10448	rs663754	rs1630171	0.16432	34.46	-1.43	-1.75741	0.0788
PRSS1	7	142457319	142460927	0.01511	rs56221145	rs56092812	0.00823	6.23	-1.753	-1.753	0.079602
HSP90B1	12	104323885	104347709	0.26901	rs184586654	rs2722192	0.479947	58.9	1.544	1.7456	0.0809
DKK3	11	11977754	12031316	0.24785	rs6485388	rs11022114	0.097969	26.61	-1.819	-1.74343	0.0813
SIRPA	20	1874813	1921238	0.29157	rs16978863	rs6136376	0.524266	-61.53	-1.732	1.73617	0.08253
A1BG	19	58856544	58864858	0.15749	rs117379656	rs1268538	0.113266	-28.62	1.892	-1.7354	0.08268
BCHE	3	165490692	165555250	0.06265	rs150539161	rs73165060	0.0583	-21.34	-1.705	1.73401	0.0829
IGF1R	15	99191768	99507759	0.06153	rs72756804	rs7162314	0.01837	-11.67	-1.028	1.7301	0.0836
LILRB3	19	54720147	54727378	0.38178	rs113717581	rs12985875	0.093072	26.04	-0.4385	-1.7297	0.08369
FCRL3	1	157644111	157670559	0.13787	rs2210912	rs3761959	0.249	42.51	-1.65	-1.72877	0.0838
SHH	7	155592674	155605157	0.02419	rs167018	rs872723	0.009403	-8.47	-0.202	1.7289	0.083836
EVL	14	100437786	100610573	0.02878	rs941898	rs34612764	0.008856	9.26	0.809	1.72579	0.0844
PCK1	20	56136136	56143177	0.04566	rs6070157	rs2070756	0.022954	13.59	0.973	1.72418	0.08467
MYO6	6	76458909	76629254	0.03649	rs41269323	rs41269323	0.01579	-10.88	-2.1308	1.7171	0.085957
TLR1	4	38792298	38858438	0.03415	rs2711975	rs5743618	0.033485	15.64	1.92612	1.71193	0.0869
NEGR1	1	71861626	72748222	0.08639	rs72678994	rs11209871	0.0129	-9.96	-1.439	1.70942	0.0874
CD8A	2	87011733	87035519	0.11561	rs62146083	rs3020726	0.07079	22.64	1.163	1.7001	0.08912
LMAN2L	2	97371666	97405801	0.02994	rs67570263	rs58361269	0.02616	14.04	-1.571	-1.6939	0.09029
NME4	16	446725	460367	0.04953	rs13333879	rs6600214	0.01225	9.79	1.42	1.6815	0.0927
NPPB	1	11917521	11919002	0.02252	rs3125816	rs198379	0.0197	12.01	-1.308	-1.67961	0.093
LRIG3	12	59265931	59314285	0.13873	rs61919549	rs11172791	0.055191	-21.04	1.185	-1.68	0.093
DUT	15	48623208	48635570	0.00471	rs1820492	rs8039702	0.00502	-6.32	-1.679	1.679	0.0932
PCYOX1	2	70484518	70508317	0.36554	rs2441355	rs2706762	0.22805	-40.61	-1.333	1.6771	0.09352
IL15RA	10	5985602	6020150	0.38044	rs4750017	rs8177643	0.187488	36.81	-0.928	-1.6717	0.0946
S100A16	1	153579362	153585621	0.06095	rs111779370	rs9729773	0.0484	19.33	1.443	1.67071	0.0948
NTF3	12	5541274	5630702	0.01927	rs7137223	rs67394720	0.002991	-6.73	-1.562	1.6696	0.095
AIF1	6	31582994	31584798	0.04494	rs2524075	rs3130623	0.00865	9.37	0.451	1.6675	0.095409
SNX8	7	2291405	2393953	0.06097	rs34911934	rs28514741	0.017219	-11.61	1.178	-1.6667	0.095576
SIGLEC6	19	52021073	52035110	0.24169	rs4801872	rs4802807	0.175583	-35.67	-0.72	1.6574	0.09744
SIGLEC5	19	52115180	52148798	0.58557	rs73049701	rs872629	0.208728	-38.85	-0.469	1.6496	0.09902
EFEMP1	2	56093102	56151274	0.07472	rs17047234	rs3791679	0.06499	21.82	2.577	1.6496	0.09903
CDH17	8	95139390	95229531	0.12122	rs76294589	rs12056840	0.057239	-20.42	1.088	-1.6475	0.0995
TBCE	1	235491885	235615756	0.16991	rs7516485	rs4469707	0.0733	-23.07	1.439	-1.64665	0.0996
PRSS2	7	142468247	NA	0.27186	rs60522379	rs1799886	0.074061	23.19	-1.166	-1.6405	0.100909
VEGFC	4	177604689	177714076	0.04985	rs112793547	rs41278571	0.024438	13.36	1.451	1.64162	0.101
CFH	1	196621173	196716634	0.13146	rs138307921	rs1048663	0.0989	-26.86	-1.113	1.63167	0.103
UBE2K	4	39699729	39784412	0.02218	rs556820989	rs58339883	0.014745	10.77	-1.395	-1.62849	0.103
PGAM2	7	44102326	44105166	0.00649	rs74788941	rs6956492	0.003559	-6.6	-1.891	1.6256	0.104029
ANXA7	10	75134859	75173834	0.15979	rs74629413	rs76150063	0.005603	-7.29	2.188	-1.617	0.1059
NEK7	1	198126124	198291550	0.04297	rs142662761	rs142662761	0.0189	-11.8	1.616	-1.616	0.106
PROK2	3	71820806	71834357	0.16007	rs75654193	rs7644362	0.17	-35.01	-1.21	1.61353	0.1066
LAP3	4	17578821	17609595	0.02543	rs77726502	rs114838597	0.013428	9.92	-0.46738	1.61107	0.107
SRL	16	4239375	4292081	0.02021	rs147990649	rs9930802	0.0126	-10.1	1.612	-1.612	0.107
SPOCK2	10	73818792	73848790	0.0272	rs7072160	rs3312	0.029813	15.13	-1.379	-1.6106	0.1073
PLCB1	20	8057898	8949007	0.00434	rs1033398	rs1033398	0.000245	3.95	-1.607	-1.607	0.10805
TPSB2	16	1277272	1280185	0.42011	rs35795451	rs3874639	0.31838	-47.93	0.79	-1.6047	0.109
LGR5	12	71833578	71980090	0.07048	rs148144706	rs17109804	0.00331	7.13	-0.128	-1.6014	0.1093
CNTN5	11	98891679	100229616	0.13486	rs7105939	rs4528296	0.069459	-22.78	0.122	1.59503	0.1107
B3GAT3	11	62382768	62389626	0.06405	rs644616	rs7122950	0.068374	-22.62	-1.605	1.59465	0.1108
XXYLT1	3	194789013	194991888	0.10192	rs9872366	rs13072883	0.0431	17.83	-0.179	-1.59407	0.1109
CCL16	17	34303529	34308533	0.35241	rs148065954	rs112689088	0.291	-45.79	-1.672	1.58429	0.1131
CST7	20	24929905	24940564	0.27104	rs73101307	rs4462848	0.109636	28.33	0.831	1.57713	0.11477
AKR1B1	7	134127108	134144036	0.08976	rs73151958	rs782546	0.023028	13.31	-1.33	-1.5735	0.115609
BCAT2	19	49298319	49314286	0.1074	rs117614497	rs62125920	0.108027	-27.97	1.738	-1.5732	0.11568
TRABD2A	2	85048774	85134132	0.00487	rs77680559	rs80090251	0.004	5.66	-1.57	-1.57	0.11642
COL9A1	6	70925743	71012787	0.02442	rs4706461	rs13199337	0.00261	6.54	-0.513	-1.5695	0.116528
ADAMTSL2	9	136397286	136440641	0.02161	rs10120207	rs10120207	0.00162	-6	-2.012	1.5645	0.1177
MANEA	6	96025361	96057346	0.33329	rs36064173	rs13205436	0.32064	-48.12	-2.092	1.5641	0.117797
SERPINA1	14	94843084	94857030	0.3887	rs11624273	rs28929474	0.119226	-29.41	-1.27	1.56215	0.1183
VWC2	7	49813234	49961546	0.34007	rs148681119	rs73347621	0.100015	-27.08	-1.03	1.5569	0.119484
FUT3	19	5842899	5851485	0.25994	rs191976566	rs708686	0.189613	-37.04	-1.306	1.5548	0.11999
PLG	6	161123270	161175129	0.42466	rs73024076	rs4252129	0.0765	-23.58	0.95	-1.5512	0.120864
NISCH	3	52489134	52527084	0.00337	rs114188957	rs4687616	0.000784	3.95	-1.549	-1.549	0.1214
RELT	11	73087444	73108519	0.00613	rs73542929	rs56801796	0.006252	7.73	-1.546	-1.546	0.1221
ACP1	2	264140	278283	0.29912	rs13416901	rs79716074	0.48529	59.17	1.639	1.543	0.12283
LAMC2	1	183155373	183214262	0.36338	rs41272538	rs2276543	0.215	39.37	-1.734	-1.53827	0.124
PDE5A	4	120415552	120549959	0.08502	rs113890665	rs58583086	0.094649	-26.21	-1.288	1.53788	0.124
NQO1	16	69740899	69760571	0.13816	rs79652879	rs57488237	0.1912	-37.23	-1.472	1.5308	0.126
PGLS	19	17622445	17632097	0.11908	rs138073764	rs73020480	0.055315	20.13	0.877	1.528	0.1265
ACAP2	3	194995474	195163773	0.00509	rs77565308	rs1832666	0.000953	-4.47	1.52	-1.52	0.1285
HNRNPAB	5	177631534	177638164	0.01276	rs890804	rs72648830	0.0044	6.76	0.989	1.51743	0.12916
SIGLEC15	18	43405640	43424059	0.01007	rs515373	rs515373	0.008377	8.07	-2.535	-1.516	0.1296
LTBP4	19	41098789	41135723	0.03877	rs149264239	rs34093919	0.014975	-10.55	-0.619	1.5116	0.13064
RHOC	1	113243749	113250056	0.0367	rs2279500	rs7415820	0.0234	-13.13	1.418	-1.50661	0.132
DLK1	14	101192042	101204561	0.08558	rs117161983	rs4905998	0.094834	26.48	-1.003	-1.49527	0.1348
NUDT9	4	88343725	88380607	0.06864	rs149558848	rs28805573	0.047193	-19.04	1.184	-1.4897	0.136
SLITRK5	13	88323626	88348527	0.07672	rs12854586	rs12856670	0.0209	-12.32	-1.409	1.4853	0.13747
SMAP1	6	71377479	71571714	0.2703	rs781984	rs1917342	0.2381	-41.47	0.742	-1.4848	0.137598
IL10RB	21	34638672	34682492	0.04928	rs2510317	rs2515717	0.02472	13.95	-0.271	-1.4834	0.138
SIGLEC9	19	51628163	51639908	0.54829	rs885146	rs2075803	0.525008	-61.54	-1.572	1.4778	0.13945
UBASH3B	11	122526430	122685181	0.05615	rs4935826	rs3937026	0.049776	-19	0.904	-1.47737	0.1396
TCN2	22	31002990	31023258	0.22121	rs117112776	rs4820885	0.406699	-54.19	1.409	-1.4771	0.1396
MGP	12	15033798	15038791	0.05311	rs547217894	rs2900342	0.083105	-25.06	-1.23	1.4697	0.1416
MUC16	19	8959520	9092018	0.03464	rs77609006	rs193266507	0.010115	-8.69	-1.0779	1.4676	0.14221
GLTPD2	17	4692259	4693884	0.09076	rs41425046	rs34460487	0.0363	16.33	0.522	1.46646	0.1425
KIR2DL3	19	55249978	55264504	0.13336	rs12608800	rs4806594	0.018237	11.7	2.194	1.4657	0.14273
CECR1	22	17659680	17739125	0.66613	rs76837825	rs2231495	0.31846	-47.95	-0.787	1.4629	0.1435
AGFG1	2	228336868	228425933	0.05258	rs10933193	rs11679534	0.07358	-23.08	-1.459	1.459	0.14457
THBS2	6	169615875	169654145	0.23366	rs12190428	rs74507247	0.15851	33.89	0.885	1.4559	0.145419
FAH	15	80444832	80479288	0.3787	rs1816591	rs11555096	0.11425	-28.74	-2.057	1.4538	0.146
GSN	9	123970072	124095121	0.01103	rs117584126	rs10985196	0.00782	-7.84	-1.451	1.451	0.1468
RDX	11	109735021	110167437	0.01341	rs1792802	rs7935163	0.002671	-5.48	2.165	-1.44782	0.1477
FH	1	241660811	241683099	0.01261	rs10926507	rs10926507	0.0127	10.1	-1.499	-1.4463	0.148
COL18A1	21	46825080	46933634	0.19676	rs146698426	rs144147445	0.04222	-17.56	-1.13	1.4471	0.148
KYNU	2	143635226	143813402	0.12654	rs116636300	rs112211045	0.22066	-39.97	-1.472	1.4458	0.14824
CTSF	11	66330935	66336350	0.03495	rs140145986	rs1044522	0.031638	15.24	-1.558	-1.44403	0.1487
TAC1	7	97361396	97369784	0.04265	rs4526299	rs2072099	0.019149	-12.12	1.955	-1.4427	0.149108
C1S	12	7096351	7178336	0.31727	rs148149970	rs73044256	0.248374	2.64	-0.818	1.4395	0.15
PLCG2	16	81772702	81996290	0.07411	rs12933606	rs62045706	0.02466	13.65	0.813	1.4407	0.15
RSPO3	6	127439816	127520626	0.08081	rs78272961	rs2154167	0.0982	26.98	1.163	1.4327	0.151939
CXCL16	17	4636828	4643223	0.03332	rs142691662	rs7214635	0.0147	11.13	1.112	1.43066	0.1525
PRSS57	19	685546	695498	0.14704	rs144944207	rs2301741	0.055174	20.01	-1.503	-1.4279	0.15332
PTGFRN	1	117452538	117532975	0.38031	rs61787816	rs4233450	0.299	46.48	1.051	1.42556	0.154
PLAUR	19	44150247	44174699	0.15225	rs112510361	rs2302524	0.04725	-18.67	1.481	-1.4225	0.15488
PF4V1	4	74719013	74720200	0.00674	rs6853814	rs872914	0.006023	-6.69	-1.422	1.422	0.155
C7	5	40909599	40984745	0.6453	rs143588597	rs74480769	0.148	-32.73	0.739	-1.42145	0.15518
GMPR	6	16238818	16295780	0.2731	rs112516254	rs6459467	0.42834	55.59	1.423	1.4213	0.155224
PCSK7	11	117075053	117103241	0.19654	rs613808	rs236910	0.339376	-49.49	1.292	-1.42093	0.1553
NAAA	4	76834813	76862166	0.25311	rs17236661	rs28451731	0.243323	-41.99	-0.729	1.41509	0.157
SWAP70	11	9685624	9774540	0.20568	rs72854119	rs10770059	0.171952	-35.27	0.832	-1.40649	0.1596
GP6	19	55525073	55549632	0.18358	rs73616408	rs1613662	0.30436	46.87	1.368	1.4044	0.16019
GFRAL	6	55192267	55267291	0.09626	rs115222037	rs73439277	0.01379	12.13	0.762	1.4036	0.16045
QPCT	2	37569970	37600465	0.07833	rs4670193	rs75573663	0.02689	-15.1	-0.0492	1.399	0.1618
TINAGL1	1	32042086	32053287	0.01705	rs56168987	rs9425884	0.00229	-5.69	-0.104	1.39846	0.162
H6PD	1	9294833	9331396	0.18639	rs12565639	rs34603401	0.133	30.96	-0.872	-1.39978	0.162
TREM1	6	41235664	41254420	0.18034	rs7754593	rs2234243	0.12285	-29.82	0.517	1.3966	0.162539
RBM17	10	6130997	6159420	0.05504	rs142471428	rs11256726	0.037729	-17	-1.44	1.3929	0.1637
RAB2A	8	61429495	61536203	0.00216	rs2625446	rs11995335	0.000111	3.86	-1.392	-1.392	0.164
HLA-DQA2	6	32709168	32714975	0.17668	rs2133036	rs9272014	0.14885	-32.9	2.0854	-1.3874	0.165305
LGMN	14	93170152	93215024	0.08404	rs138372989	rs148659834	0.019336	-12.04	1.21	-1.38584	0.1658
GCLM	1	94350755	94375012	0.05508	rs11806635	rs7521934	0.0252	-13.98	-0.665	1.3862	0.166
GRHPR	9	37422663	37436987	0.09237	rs62533676	rs4878690	0.05844	20.59	-1.099	-1.38199	0.167
KIRREL2	19	36346763	36358038	0.01776	rs35854130	rs35854130	0.004491	-8.34	2.525	-1.3802	0.16752
ROR1	1	64239688	64647181	0.256	rs79550973	rs2224876	0.122	-29.64	-1.196	1.3743	0.169
THBS4	5	79287134	79379110	0.12817	rs150145817	rs13167730	0.0716	22.77	0.824	1.37511	0.1691
SFTPB	2	85884437	85895864	0.41198	rs17431091	rs1130866	0.13379	-31.1	-1.326	1.3744	0.16931
LRP11	6	150139893	150185495	0.24207	rs139848840	rs3805753	0.38271	52.63	1.441	1.3709	0.170407
GSR	8	30535583	30585363	0.06774	rs11574366	rs2551710	0.012201	-9.99	-2.124	1.367	0.172
PDGFRL	8	17433942	17501580	0.09564	rs17689740	rs78243536	0.044175	-18.41	-2.111	1.3671	0.172
FAM3B	21	42676139	42729654	0.28621	rs2838113	rs57529409	0.1191	-29.39	-0.646	1.366	0.172
B3GNT8	19	41931264	41934635	0.15593	rs284662	rs284663	0.331504	48.93	-1.209	-1.3638	0.17263
MTHFS	15	80125927	80189721	0.41199	rs622506	rs8039272	0.23231	-40.99	0.038	1.3615	0.1733
CD248	11	66081965	66084515	0.01364	rs490972	rs565972	0.002212	5.71	-1.459	-1.35152	0.1765
AKR1D1	7	137687070	137803051	0.01342	rs73152547	rs9642091	0.010617	9.07	-1.35	-1.3497	0.177099
TGFBI	5	135364677	135399507	0.21024	rs61603987	rs13159365	0.221	-39.94	-1.448	1.34546	0.17848
FMOD	1	203309756	203320886	0.07298	rs7543148	rs10920616	0.0407	-17.54	1.142	-1.34321	0.179
POFUT1	20	30795683	30826461	0.25401	rs6061085	rs76143353	0.124336	-29.97	-1.181	1.34298	0.17928
NME2	17	49242796	49249105	0.247	rs72842239	rs115848216	0.148	-32.74	1.158	-1.34282	0.1793
STAMBP	2	74056043	74100786	0.01159	rs75173799	rs77000353	0.00392	5.82	0.953	1.3418	0.17965
FCER2	19	7753644	7767032	0.10375	rs73008270	rs62110713	0.046932	-18.52	1.409	-1.3405	0.18008
ATF6B	6	32083041	32096030	0.17412	rs557011	rs6449	0.03036	14.9	-0.128	-1.3367	0.18133
CD59	11	33724556	33758025	0.07006	rs831616	rs831630	0.066144	-22.11	-1.417	1.33473	0.182
MMP10	11	102641233	102651359	0.26282	rs117413039	rs17860955	0.035215	-16.9	0.409	-1.33439	0.1821
MAPK12	22	50683879	50700145	0.0347	rs5771041	rs2272855	0.018889	-11.81	0.226	-1.3334	0.1824
PTPRS	19	5158506	5340814	0.01132	rs12151092	rs55763631	0.001118	5.24	1.603	-1.3318	0.18294
UROD	1	45476622	45481247	0.09849	rs11211066	rs12749939	0.238	-41.56	1.458	-1.33057	0.183
MAN2B2	4	6576916	6625089	0.31372	rs61729241	rs2301790	0.416168	54.8	-1.022	-1.33135	0.183
TRIM3	11	6469843	6495689	0.0108	rs2555148	rs2344827	0.005393	-6.69	-1.329	1.329	0.1838
NRP2	2	206546714	206662857	0.15705	rs62171547	rs62172729	0.0164	-11.88	-0.8547	1.3286	0.18397
ACP6	1	147101453	147142646	0.60994	rs74125751	rs12119079	0.35	49.94	1.237	1.32773	0.184
PDE5A	4	120415552	120549959	0.14279	rs62326295	rs58583086	0.11464	-28.83	-1.288	1.32657	0.185
CRK	17	1323983	1366456	0.02293	rs138158548	rs12936625	0.0182	-11.61	-0.91	1.32014	0.1868
SECTM1	17	80278900	80291950	0.08418	rs114740720	rs4789684	0.06	20.87	0.467	-1.31724	0.1878
FAIM3	1	207076662	207096592	0.00896	rs17436907	rs72758947	0.00735	-7.43	1.316	-1.316	0.188
IGSF8	1	160061130	160068733	0.03038	rs62621216	rs12408242	0.0285	14.47	1.432	1.31617	0.188
APOL1	22	36649117	36663576	0.12171	rs36000500	rs10854688	0.075521	23.54	1.309	1.3149	0.1885
DBI	2	120124500	120130126	0.10727	rs7601875	rs6714264	0.08616	-25.15	1.401	-1.3146	0.18866
CST5	20	23856571	23860385	0.16751	rs2261399	rs6138152	0.154322	33.58	-0.42	-1.31375	0.18893
NTNG1	1	107682629	108027545	0.18175	rs4311917	rs76374975	0.147	32.64	1.396	1.31067	0.19
CD200R1	3	112640052	112693950	0.0434	rs150062416	rs62263730	0.0249	13.56	-0.91	-1.31022	0.1901
P4HB	17	79801035	79818732	0.02845	rs2228309	rs56112103	0.0192	11.95	-1.309	-1.309	0.1905
TAGLN2	1	159887897	159895297	0.04108	rs10797054	rs2789422	0.0277	-14.29	1.257	-1.30723	0.191
DLK1	14	101192042	101204561	0.08551	rs117671229	rs4905998	0.097793	26.91	-1.003	-1.3066	0.1913
MANSC4	12	27915360	27933169	0.14736	rs117999707	rs12368818	0.282782	45.23	1.129	1.3061	0.1915
SMPDL3A	6	123110194	123130865	0.10625	rs9320919	rs28385609	0.05807	-20.54	0.831	-1.3058	0.19163
MFAP2	1	17300997	17307127	0.07799	rs6682671	rs761422	0.0728	23.65	0.898	1.30317	0.193
FCN2	9	137772656	137779369	0.1694	rs7045964	rs3124956	0.10512	-27.56	0.423	-1.30182	0.193
PLG	6	161123270	161175129	0.54602	rs76596562	rs537579467	0.07847	24.02	0.2884	-1.3015	0.193081
NID2	14	52471521	52535946	0.10243	rs111751450	rs941622	0.125698	30.22	-0.958	-1.30127	0.1932
QDPR	4	17461884	17513829	0.27052	rs73135036	rs7661303	0.200076	-38.01	-1.192	1.29303	0.196
ATRN	20	3451665	3631765	0.25444	rs79415576	rs118065662	0.092487	-25.88	-1.062	1.29167	0.19647
UNC5C	4	96083655	96470357	0.07867	rs41275689	rs1994292	0.044631	18.01	-0.037	-1.28967	0.197
NT5C	17	73126320	73127852	0.17685	rs9906330	rs78625720	0.117	-29.24	-0.404	1.28851	0.1976
SPINT1	15	41136216	41150405	0.05838	rs17658212	rs17658212	0.02718	-14.07	1.465	-1.2758	0.202
HIBCH	2	191054461	191208919	0.14258	rs291427	rs291466	0.33359	49.07	-1.387	-1.2732	0.20295
GBP2	1	89571815	89616139	0.02062	rs72728730	rs10922556	0.00759	7.97	0.936	1.27422	0.203
GSTM3	1	110276554	110283660	0.2599	rs115394162	rs1292096	0.0945	-26.32	-0.3677	1.27299	0.203
IGFBP6	12	53491220	53496129	0.01544	rs11170353	rs822688	0.011543	-9.3	-0.872	1.2729	0.2031
RSPO3	6	127439816	127520626	0.08413	rs35848181	rs1892172	0.12358	29.94	1.208	1.2716	0.203502
PRKCSH	19	11546105	11561783	0.05246	rs118013210	rs11557488	0.02712	14.05	-1.341	-1.2679	0.20483
KL	13	33590561	33640280	0.04859	rs12716668	rs73176836	0.00917	9.32	-0.005	1.2666	0.2053
CTSH	15	79213400	79241916	0.39211	rs7170918	rs2289702	0.30453	-46.9	-0.576	1.2645	0.2061
UXS1	2	106709764	106810757	0.03886	rs6739238	rs7591409	0.02703	-14.12	1.512	-1.2635	0.20643
EPHB4	7	100400187	100425145	0.0343	rs2293768	rs314346	0.03065	15.34	-0.615	-1.2623	0.206829
IL1RL1	2	102927962	102968497	0.29196	rs112793749	rs950880	0.18228	-38.27	-1.931	1.2613	0.20721
CCL23	17	34340096	34345009	0.41392	rs117761287	rs712048	0.179	-36.04	-1.965	1.26085	0.2074
AIF1L	9	133971863	133998539	0.11723	rs72770746	rs11244284	0.11974	-29.44	-0.957	1.25841	0.2082
REN	1	204123947	204159452	0.01193	rs11240609	rs141995914	0.012	9.38	-0.985	-1.25404	0.21
IDH1	2	209100953	209130798	0.23911	rs6744366	rs3928183	0.06312	23.35	0.119	1.2495	0.21149
PROC	2	128176003	128186818	0.01981	rs4150416	rs1799809	0.02481	13.66	0.97	1.2491	0.21162
BTD	3	15642848	15763818	0.35051	rs34885143	rs71627145	0.158	-34.12	-1.415	1.24655	0.2126
CBLN1	16	49311828	49315749	0.34996	rs143434268	rs12596832	0.26051	-43.5	0.825	-1.2456	0.213
ERBB3	12	56470583	56497289	0.04228	rs186719671	rs2292238	0.018141	-11.85	1.243	-1.243	0.2139
SH3BGRL3	1	26606577	26608013	0.09094	rs4375257	rs4659423	0.181	-36.3	0.662	-1.24349	0.214
MTHFSD	16	86563784	86588841	0.06384	rs55997273	rs9937599	0.08992	25.64	-0.871	-1.2402	0.215
ITLN1	1	160846330	160854970	0.00918	rs191217950	rs61803286	0.00341	5.84	-0.312	-1.23833	0.216
VPS24	2	86730553	86790602	0.02648	rs7604179	rs59613942	0.02334	13.25	-1.508	-1.2368	0.21616
SEPW1	19	48281842	48287943	0.05491	rs10412662	rs11671137	0.04195	18.53	0.3652	1.2345	0.21701
OLFM1	9	137967268	138013026	0.02162	rs3789914	rs72778149	0.00777	7.64	-0.201	-1.23183	0.218
PRDX6	1	173446469	173457954	0.04502	rs7524592	rs33951697	0.0784	24.06	-1.966	-1.22877	0.219
TLL1	4	166794389	167025609	0.02499	rs55833593	rs28569800	0.000895	-4.98	0.479	-1.22964	0.219
PLTP	20	44527260	44540794	0.18125	rs539785172	rs111602331	0.161079	-34.32	1.276	-1.22918	0.219
PLXNA1	3	126701536	126756232	0.06548	rs4679302	rs9822602	0.0807	-24.2	-0.222	1.22612	0.2202
HSPA1A	6	31783320	31785723	0.01794	rs17206980	rs74434374	0.0058	-7.14	0.477	1.2224	0.221541
SPINK7	5	147691982	147695485	0.13945	rs2287768	rs9784645	0.0331	15.62	-1.364	-1.22221	0.22163
PIGR	1	207101867	207119811	0.02196	rs147007411	rs6540730	0.0189	-12.26	-0.666	1.22024	0.222
TAX1BP3	17	3566189	3571973	0.02412	rs72835828	rs160589	0.0106	8.99	1.108	1.2181	0.2232
TNFSF14	19	6661264	6670599	0.00851	rs116485000	rs413141	0.000351	-4.85	-0.004	1.2176	0.22337
RNASE2	14	21423646	21424595	0.04224	rs7492769	rs2233859	0.046308	18.34	1.216	1.216	0.224
CBR3	21	37507377	37518860	0.23081	rs57185707	rs60376898	0.32543	-48.63	1.165	-1.2125	0.225
APP	21	27252861	27543446	0.02284	rs73163716	rs439826	0.01192	-9.64	-0.21	1.2146	0.225
TNFRSF11B	8	119935796	119964124	0.06053	rs182140459	rs2468184	0.007545	8.38	-0.995	-1.2097	0.226
LECT2	5	135257968	135290672	0.50447	rs79353321	rs2526147	0.231	-40.92	1.585	-1.21041	0.22612
ST13	22	41220539	41252643	0.03693	rs151095904	rs138337	0.037901	16.86	-0.807	-1.2063	0.2277
EPHB1	3	134514102	134979309	0.0805	rs12496766	rs10935143	0.0739	23.74	-0.826	-1.20275	0.2291
ITIH4	3	52846978	52864704	0.03165	rs34365302	rs3617	0.0107	9.69	0.95	1.20234	0.2292
CHMP2B	3	87276421	87304706	0.07533	rs115730960	rs300978	0.145	32.35	1.137	1.19978	0.2302
IL15RA	10	5985602	6020150	0.02793	rs17151529	rs8177643	0.010609	8.99	-0.928	-1.1991	0.2305
CPNE1	20	34213953	34252878	0.45423	rs6058339	rs113522583	0.327509	-48.66	1.248	-1.19803	0.23091
GSTM1	1	110230436	110251661	0.37219	rs413582	rs115929572	0.0754	24.34	0.1525	1.19851	0.231
NPTX2	7	98246597	98259181	0.06153	rs77830411	rs12673464	0.037783	16.56	-1.418	-1.1975	0.231103
MANSC1	12	12478990	12503176	0.066	rs118037557	rs3741798	0.083555	24.69	-1.018	-1.1973	0.2312
ROBO1	3	78646389	79817148	0.09102	rs73124681	rs3773232	0.0355	16.2	-1.857	-1.19633	0.2316
CDON	11	125825691	125933230	0.18078	rs12803395	rs112978541	0.171934	-35.27	-0.603	1.19456	0.2323
IGFBP2	2	217497551	217529159	0.01589	rs114951980	rs4674091	0.00438	-6.24	-1.543	1.1941	0.23246
ADAMTSL1	9	17906561	18910948	0.0467	rs6475184	rs117766170	0.01414	10.41	-1.727	-1.19143	0.2335
ST8SIA6	10	17357420	17496594	0.02534	rs72778956	rs11595070	0.006679	-8.29	-0.948	1.19	0.2341
MAX	14	65472892	65569413	0.04357	rs12435326	rs762810	0.069752	-22.63	-0.902	1.1893	0.2343
RET	10	43572512	43625799	0.10968	rs1416227	rs2506008	0.097101	26.57	-0.465	-1.1889	0.2345
SEZ6L	22	26565428	26779563	0.10671	rs5752239	rs655581	0.012636	-10.84	0.449	-1.1858	0.2357
NPNT	4	106815932	106925184	0.13865	rs150315577	rs34712979	0.055173	-20.06	1.018	-1.18523	0.236
ART4	12	14978503	14996460	0.16954	rs141210497	rs7311924	0.444401	56.72	-1.233	-1.1806	0.2378
PEAR1	1	156863490	156886221	0.14601	rs143625022	rs12041331	0.0459	-18.25	0.916	-1.17381	0.24
NSFL1C	20	1422807	1454487	0.0254	rs6042354	rs4814391	0.003087	7.54	-0.061	1.17141	0.24143
SCGB3A1	5	180017105	180018499	0.01746	rs7725605	rs307802	0.00549	6.87	-1.078	-1.17001	0.242
FN1	2	216225163	216300796	0.04318	rs141994536	rs1250258	0.03081	15.11	-1.238	-1.1698	0.24207
STAT3	17	40465342	40540558	0.05612	rs7207285	rs4796791	0.0827	24.5	1.169	1.169	0.2424
C1RL	12	7242183	7261834	0.28526	rs150452082	rs146111161	0.044313	-3.8	-0.573	1.1679	0.2429
F11	4	187187343	187210835	0.13894	rs12640032	rs2289252	0.083288	24.6	-1.24	-1.16683	0.243
IHH	2	219919146	219925643	0.0052	rs114150340	rs55836193	0.00205	-4.66	-1.166	1.166	0.24361
APOA4	11	116691416	116694020	0.05273	rs4225	rs12721043	0.031056	-15.07	-1.776	1.16223	0.2451
EMILIN3	20	39988602	39995458	0.20007	rs6072218	rs4810316	0.062248	21.3	-0.326	1.16185	0.2453
SEMA3E	7	82992554	83278455	0.29888	rs62473888	rs3801499	0.246002	-42.17	-1.092	1.1604	0.245879
SH3GLB2	9	131769315	131790610	0.10832	rs7855915	rs11537529	0.16306	-34.34	-1.1	1.16006	0.246
NTRK2	9	87283466	87641969	0.02317	rs11140453	rs11140774	0.00558	-6.87	-1.376	1.16018	0.246
UST	6	149068166	149398126	0.04723	rs60463810	rs7764228	0.009	-9.26	2.0812	-1.1597	0.246153
CHAD	17	48541857	48546267	0.0134	rs80200503	rs184613584	0.00765	-7.65	0.307	-1.15073	0.2498
PSME2	14	24612571	24616779	0.06574	rs78499775	rs2236352	0.035439	16.46	-0.41	-1.14827	0.2509
LRP11	6	150139893	150185495	0.21424	rs117717327	rs1889471	0.49903	60.28	1.0033	1.1472	0.251301
PPID	4	159630279	159644548	0.3464	rs116363527	rs17843929	0.298602	46.42	-1.128	-1.14657	0.252
CD14	5	140011313	140013286	0.07745	rs144024964	rs5744441	0.0346	-16.04	-1.34	1.14132	0.25373
TBC1D5	3	17198654	18486309	0.00519	rs115447659	rs11128865	-1.97e-05	-3.79	0.945	1.14079	0.254
IFNAR1	21	34696734	34732170	0.23867	rs2834087	rs2211687	0.2283	-40.65	1.077	-1.1401	0.254
KDELC2	11	108342839	108369111	0.28739	rs227092	rs141379009	0.109415	-28.42	-1.067	1.13519	0.2563
PSMD9	12	122326638	122356203	0.01611	rs77150736	rs10743185	0.020002	12.18	1.133	1.133	0.2572
OLFM2	19	9964394	10047191	0.32232	rs11556087	rs62104305	0.313106	47.61	-1.151	-1.1269	0.25978
LAYN	11	111411005	111432470	0.03435	rs11828343	rs4938792	0.028963	-14.78	1.022	-1.12488	0.2606
ADH1C	4	100257654	100273903	0.12968	rs11733695	rs283415	0.144197	32.27	-0.546	-1.12315	0.261
KLB	4	39408550	39453153	0.34112	rs78657048	rs13112140	0.183892	-36.47	1.577	-1.1231	0.261
SMPD1	11	6411670	6416228	0.26871	rs78106294	rs1050239	0.129988	-30.64	0.112	-1.12399	0.261
DNAJB11	3	186285192	186303589	0.0555	rs17366568	rs56227532	0.0458	-18.27	-0.958	1.12332	0.2613
KREMEN1	22	29469023	29564321	0.23183	rs74916285	rs2205771	0.045949	18.26	-0.077	1.1233	0.2613
RARRES2	7	150035406	150038751	0.07695	rs150175139	rs3735167	0.094737	26.19	1.507	1.1168	0.26408
KDR	4	55944648	55991762	0.42042	rs148023127	rs34231037	0.072418	-22.98	-0.927	-1.10961	0.267
DPP7	9	140004998	140009629	0.15319	rs2811789	rs4880198	0.09399	-26.1	1.002	-1.10669	0.2684
VWA2	10	115999013	116054248	0.15702	rs630051	rs35060624	0.029364	15.29	-1.244	-1.1033	0.2699
CRABP2	1	156669398	156675608	0.21736	rs72710240	rs3806412	0.142	32	-1.13	-1.10371	0.27
HSPC159	2	64681103	64688515	0.04789	rs113149270	rs76392037	0.03336	15.56	-1.086	-1.1025	0.27024
CFHR4	1	196857144	196887843	0.60863	rs942588	rs10494745	0.165	-34.57	-0.5408	1.09858	0.272
HDGF	1	156711901	156736717	0.13553	rs4443882	rs4399146	0.178	-36.01	-1.073	1.09884	0.272
PPT1	1	40538382	40562932	0.14171	rs187803473	rs7533094	0.114	-28.64	-1.781	1.09831	0.272
DSC2	18	28638806	28682485	0.14464	rs71359340	rs1790683	0.046216	-18.89	-0.742	1.098	0.2724
CNTN1	12	41086241	41466217	0.163	rs1965163	rs11177604	0.036702	16.97	-1.664	-1.0933	0.2743
LYVE1	11	10578513	10633236	0.05668	rs117791142	rs114758648	0.018757	11.85	-0.116	-1.09178	0.2749
ADAM22	7	87563458	87832204	0.16205	rs78184612	rs12670575	0.099121	-26.83	0.806	-1.0895	0.275914
EGFR	7	55086710	55279321	0.09007	rs13244925	rs75059484	0.010444	-10.5	-0.767	-1.0851	0.277889
PLAT	8	42032236	42065227	0.00992	rs8178885	rs77346091	0.011275	-9.23	-1.084	1.084	0.278
GNPTG	16	1401932	1415738	0.1391	rs2575352	rs6600137	0.08929	-25.45	0.947	-1.0847	0.278
MAPRE1	20	31407760	31438211	0.08465	rs242535	rs414049	0.111524	-28.5	-0.406	1.08447	0.27816
CA6	1	9005926	9035151	0.43027	rs41278978	rs3765963	0.202	38.17	1.006	1.08217	0.279
ENTPD6	20	25176329	25208711	0.05151	rs12480682	rs6050446	0.018226	12.13	-0.906	-1.08171	0.27938
RNASET2	6	167335601	167370679	0.1956	rs73789733	rs9457245	0.09817	-26.7	-0.702	-1.0765	0.281694
GPR56	16	57644564	57699492	0.01706	rs118127254	rs1868681	0.00683	7.31	0.948	1.0734	0.283
ARHGAP1	11	46698630	46722169	0.00305	rs7121257	rs11038977	0.000336	-4.24	-1.076	1.07205	0.2837
NAPG	18	10525902	10552761	0.00417	rs9959511	rs518978	0.003098	-5.09	1.072	-1.072	0.2837
ECH1	19	39306062	39322481	0.13938	rs672576	rs2229259	0.095574	26.32	1.072	1.072	0.28372
NPTX1	17	78440634	78451643	0.07675	rs142450095	rs62068268	0.0671	22.36	1.607	1.07188	0.2838
TNFSF15	9	117546932	117568319	0.01527	rs76235895	rs56339337	0.00377	-6.71	0.537	-1.0669	0.286
SERPINA3	14	95078721	95090392	0.13705	rs117815548	rs17753556	0.083401	-24.61	-0.4478	1.06673	0.2861
STX8	17	9153788	9479908	0.04359	rs149033666	rs35082231	0.0384	16.84	-1.141	-1.06603	0.2864
DDX19A	16	70380764	70407286	0.0591	rs77797599	rs138325325	0.02909	-14.75	1.549	-1.0655	0.287
TGFBR3	1	92145900	92371892	0.04179	rs284175	rs79859654	0.011	9.34	-0.9282	-1.06242	0.288
HDGF	1	156711901	156736717	0.20278	rs3431	rs12145743	0.276	-44.65	-1.066	1.05993	0.289
GSTM4	1	110198721	110217458	0.30574	rs115394162	rs687643	0.0685	-23.38	-0.085	1.06022	0.289
C1QC	1	22970126	22974603	0.29541	rs17360017	rs75380810	0.069	22.37	0.742	1.05826	0.29
CD14	5	140011313	140013286	0.08742	rs140717229	rs5744441	0.0357	-16.1	-1.34	1.05715	0.29044
FAM151A	1	55074854	55089229	0.11698	rs300279	rs11206398	0.0408	17.31	-0.474	-1.0552	0.291
LYPD3	19	43964939	43969760	0.04201	rs4803633	rs11666797	0.011615	-10.66	0.779	-1.0557	0.29109
ALDH3A1	17	19641297	19652256	0.03054	rs12948735	rs887241	0.0214	12.46	-0.945	-1.0545	0.2917
APEX1	14	20923350	20925931	0.05044	rs74881682	rs1130409	0.020134	12.21	-1.324	-1.05357	0.2921
PCOLCE	7	100199986	100205798	0.03227	rs2293768	rs7385804	0.022862	13.02	0.409	1.053	0.292345
IL17B	5	148750887	148783765	0.01892	rs34755179	rs6862301	0.0146	10.38	-1.052	-1.052	0.2928
PLEK	2	68592414	68624585	0.09408	rs113922708	rs1867312	0.09516	26.22	-0.79	-1.05	0.2937
MAN1A2	1	117910071	118071494	0.11284	rs1418451	rs4659047	0.0631	-21.84	-0.677	1.05015	0.294
HEXB	5	73935848	74018472	0.17768	rs73110977	rs13164140	0.0792	23.94	-0.481	1.04924	0.29407
CNTN4	3	2140497	3099643	0.16705	rs150212552	rs13071423	0.0354	17.3	0.651	1.04567	0.2957
PYGL	14	51324609	51411201	0.1414	rs12884661	rs12717412	0.041825	-17.56	0.969	-1.04567	0.2957
ESD	13	47345391	47371555	0.30363	rs11841008	rs9778	0.12571	-30.14	2.029	-1.0438	0.29657
TAGLN2	1	159887897	159895297	0.04534	rs876538	rs2789422	0.0313	-15.09	1.257	-1.04295	0.297
LIFR	5	38474770	38608456	0.07727	rs77567285	rs3729741	0.0276	14.41	-0.483	-1.04132	0.29773
SLITRK3	3	164904508	164914897	0.15358	rs9856674	rs62282371	0.0696	-22.66	-1.802	1.04122	0.2978
INPP5B	1	38326369	38412729	0.12002	rs4653337	rs112836202	0.2	-38.17	0.293	-1.04044	0.298
CACNA2D3	3	54156574	55108584	0.10579	rs73083904	rs6802227	0.0362	16.36	0.4	1.04026	0.2982
APOM	6	31620193	31625987	0.10012	rs2855811	rs805264	0.04408	-18.05	-0.601	1.0339	0.30118
C1QTNF9	13	24881304	24896673	0.06016	rs34184691	rs56069023	0.04961	-19	1.19	-1.0332	0.30149
SERPINB13	18	61254223	61271873	0.03032	rs9952185	rs77157727	0.013057	-10.29	-0.709	1.033	0.3018
GKN2	2	69172364	69180025	0.20397	rs4629190	rs62133344	0.0949	-26.21	-1.208	1.0317	0.30221
MENT	1	151020227	151024462	0.0072	rs113543611	rs34725710	-0.000135	-3.68	0.947	1.02852	0.304
THG1L	5	157158428	157168457	0.42884	rs73301494	rs2270812	0.322	48.21	1.157	1.02734	0.30426
SEMA3C	7	80371854	80551675	0.04045	rs327670	rs1019016	0.011798	10.58	-0.322	-1.0232	0.306213
CPOX	3	98298290	98312492	0.06686	rs2178322	rs1675513	0.0185	-11.67	0.885	1.02088	0.3073
TYMP	22	50964181	50968461	0.05174	rs131815	rs131805	0.045144	18.15	0.849	1.02	0.3077
CA1	8	86239837	86291243	0.08683	rs981495	rs116866430	0.045104	-18.24	0.358	-1.0185	0.308
CLIC5	6	45848564	46048085	0.26546	rs77689444	rs35822882	0.07306	-23.02	-0.151	-1.0179	0.308729
LILRA6	19	54740468	54746640	0.46874	rs1761450	rs34810796	0.191227	37.18	1.775	1.0153	0.30999
PCSK1	5	95726037	95769847	0.26495	rs62364653	rs13169290	0.399	-53.66	-1.063	1.01518	0.31002
ERLEC1	2	54014181	54045956	0.02738	rs3770411	rs2692523	0.01627	-11.31	-1.29	1.014	0.31056
GIF	11	59596746	59612972	0.00435	rs78317116	rs150884181	0.005492	-6.49	1.012	-1.012	0.3115
ADH7	4	100333418	100356667	0.07908	rs283421	rs17529509	0.035284	-16.11	-0.937	1.01059	0.312
CALCOCO2	17	46908380	46943884	0.02518	rs140014388	rs318100	0.02	-12.47	0.942	-1.00895	0.313
FCN2	9	137772656	137779369	0.25372	rs74990204	rs11103563	0.19802	-37.89	0.461	-1.00596	0.3144
CYB5D2	17	4046462	4090605	0.1055	rs117770728	rs183282334	0.0499	-19.13	0.989	-1.00241	0.3161
SAR1A	10	71907045	71930279	0.05317	rs7904736	rs4746970	0.077617	23.73	1.165	1.0016	0.3165
FAIM	3	138327448	138352218	0.35969	rs604849	rs641320	0.0684	-22.26	0.935	-0.99613	0.3192
CHGA	14	93389495	93401630	0.05369	rs36094674	rs729940	0.026188	-13.88	-0.807	0.99604	0.3192
NUDT2	9	34329504	34343709	0.31868	rs10814104	rs10971956	0.27336	44.92	1.031	0.99516	0.3197
ABO	9	136108665	136151440	0.18175	rs138683771	rs8176632	0.29217	45.9	0.831	0.99456	0.3199
CDCP1	3	45123769	45187914	0.12491	rs6764677	rs62244469	0.0389	-17.06	0.308	-0.99398	0.3202
ANG	14	21152336	21167130	0.29317	rs1243681	rs4982325	0.136212	32.27	-0.046	-0.99389	0.3203
POMGNT2	3	43120724	43147571	0.06195	rs13433902	rs2002182	0.0794	-24.04	1.064	-0.99327	0.3206
RIPK2	8	90770034	90803292	0.00492	rs13262484	rs34211510	0.004766	6.2	-0.992	-0.992	0.321
RARRES1	3	158414681	158450278	0.39465	rs77065411	rs4680458	0.177	35.82	0.231	0.99114	0.3216
SH3BGRL2	6	80341046	80413372	0.10395	rs62413423	rs2245410	0.08898	25.43	0.676	0.9908	0.32177
CST3	20	23607343	23619110	0.11393	rs79806448	rs2405367	0.117335	-29.54	-0.59	0.98896	0.32268
HMBS	11	118955576	118964259	0.05483	rs139527411	rs72995454	0.008039	8.73	-0.747	-0.9872	0.3235
PDCD6IP	3	33840063	33911199	0.10502	rs6772795	rs1141054	0.176	-35.68	1.007	-0.98538	0.3244
NMT2	10	15144583	15210692	0.05676	rs11594850	rs11259539	0.024348	-13.5	1.254	-0.9846	0.3248
CRP	1	159682079	159684379	0.06035	rs188662236	rs2794520	0.0324	-15.46	-0.097	0.9849	0.325
PEX14	1	10532345	10690815	0.00692	rs75905740	rs184041999	0.00151	-5.01	-1.471	0.98294	0.326
HK3	5	176307870	176326347	0.01356	rs61749653	rs61749653	0.0108	-9.08	2.306	-0.98069	0.32675
AK1	9	130628765	130639954	0.07793	rs2245677	rs78181560	0.03231	-15.72	-1.397	0.98014	0.327
NAPA	19	47990894	48018348	0.04094	rs2914005	rs71363738	0.022055	12.71	0.525	0.9786	0.32779
PTK7	6	43044045	43129457	0.0594	rs116524337	rs140927825	0.02079	12.41	0.109	-0.9742	0.329955
NMRAL1	16	4511692	4545764	0.07722	rs117319561	rs11557236	0.04037	-17.13	-0.503	0.9734	0.33
TYRO3	15	41849873	41875787	0.05947	rs12593920	rs1200353	0.026	-13.76	-1.049	0.9726	0.3308
TFF1	21	43782391	43786644	0.0749	rs55658867	rs3761376	0.04698	-18.44	0.748	-0.9729	0.331
AKR1A1	1	46016215	46035721	0.3428	rs114747394	rs2229540	0.231	-40.86	0.805	-0.96911	0.332
MMP1	11	102660132	102668891	0.21868	rs17860517	rs1144396	0.047168	18.6	0.922	0.96947	0.3323
FCGR3B	1	161592986	161601753	0.1357	rs139982634	rs10800573	0.0923	25.96	-0.7084	-0.96814	0.333
CHIT1	1	203181955	203242769	0.33584	rs61825606	rs872583	0.313	-47.57	1.134	-0.96451	0.335
C3	19	6677715	6730573	0.0332	rs2161486	rs11569415	0.009865	10.79	-0.981	-0.9624	0.33584
MATN3	2	20191813	20212429	0.44353	rs143517494	rs11694716	0.25901	-43.25	-0.308	0.9614	0.33637
TPST1	7	65670304	65885530	0.04976	rs55805591	rs313829	0.054094	20.69	1.005	0.9613	0.336387
B3GNT2	2	62423250	62451866	0.04809	rs111861284	rs34361686	0.02153	13.95	0.857	0.9606	0.33676
JAM3	11	133938966	134021896	0.02191	rs11223724	rs655627	0.022363	12.82	0.729	0.96004	0.337
FAM3B	21	42676139	42729654	0.08533	rs73224189	rs57529409	0.044	-17.87	-0.646	0.9582	0.338
CCDC126	7	23637001	23684327	0.08979	rs10249628	rs35121828	0.092782	26.08	0.597	0.9581	0.338018
IL1R1	2	102681004	102796334	0.05475	rs17801985	rs2287047	0.02085	-12.71	0.54	-0.9547	0.33971
CFB	6	31913427	31919861	0.23237	rs116043458	rs541862	0.11286	28.59	0.334	0.9506	0.341802
SERPINA12	14	94953611	94984181	0.21298	rs117599045	rs4900236	0.098191	26.78	-0.465	-0.94963	0.3423
PXDN	2	1635659	1748624	0.03503	rs28909998	rs10185594	0.02213	12.78	-0.96	-0.9492	0.34252
ST6GALNAC6	9	130647600	130667687	0.00933	rs79654004	rs61740973	0.00197	-5.47	1.24	-0.94894	0.3427
COL15A1	9	101705461	101833074	0.10037	rs2808542	rs10819566	0.04721	20.14	1.866	0.94715	0.3436
SCARF1	17	1537152	1549038	0.40386	rs182557617	rs2272011	0.333	-49.01	-1.504	0.94414	0.3451
CXCL6	4	74702357	74714781	0.26505	rs74451052	rs16850073	0.179899	36.05	-1.198	-0.94275	0.346
YWHAB	20	43514343	43537173	0.19778	rs6017437	rs6031847	0.322603	-48.35	1.019	-0.94029	0.34707
F5	1	169481189	169555826	0.23606	rs4656682	rs61808983	0.0647	-21.68	-0.105	-0.93755	0.348
PNKP	19	50363139	50381608	0.01334	rs2305922	rs2290774	0.003347	-5.93	1.789	-0.9378	0.34835
ANXA4	2	69871557	70054244	0.04655	rs10195155	rs2228203	0.08322	-24.69	0.682	-0.9369	0.34881
VPS4A	16	69345253	69360842	0.00536	rs182601918	rs9924894	0.00509	6.98	0.937	0.937	0.349
GSN	9	123970072	124095121	0.06051	rs140173589	rs78573713	0.01968	-12.34	-0.455	0.93536	0.3496
SERPINA4	14	95027779	95036250	0.3268	rs17091486	rs10139745	0.203395	38.37	0.748	0.93153	0.3516
IGLON5	19	51814898	51834145	0.05843	rs62115062	rs7246422	0.012259	10.35	0.086	0.9314	0.35164
REG4	1	120336640	120354203	0.02961	rs41427946	rs2298069	0.016	-10.85	1.207	-0.93144	0.352
CHI3L1	1	203148059	203155832	0.44056	rs2802769	rs946259	0.345	-49.9	0.832	-0.93126	0.352
FJX1	11	35640008	35642413	0.07853	rs11033414	rs10768174	0.036659	-16.41	1.267	-0.93016	0.3523
QSOX2	9	139098179	139137658	0.16031	rs11145916	rs10858248	0.10195	-27.18	-0.338	0.92945	0.3527
REG3A	2	79384129	79386879	0.06516	rs3754810	rs116652994	0.02359	13.12	0.92	-0.9269	0.35396
SVEP1	9	113127528	113342160	0.20286	rs117900161	rs78742138	0.05747	20.4	1.395	0.92656	0.3542
LRRC4C	11	40135753	41481323	0.06141	rs4756514	rs10837377	0.035788	-16.1	-0.914	0.9235	0.3557
GNLY	2	85912298	85925975	0.27148	rs4832191	rs12151742	0.20782	38.73	0.885	0.9217	0.35667
RNASE1	14	21269387	21271014	0.20067	rs61995582	rs17254387	0.07675	23.59	1.751	0.9214	0.3568
BOLA1	1	149859440	149872351	0.08213	rs115584674	rs1376675	0.165	34.78	-0.855	-0.92119	0.357
CD200	3	112051194	112081659	0.04029	rs186612712	rs1879514	0.0167	11.18	0.939	0.92091	0.3571
RNASE6	14	21249427	21250626	0.30203	rs117682133	rs1045922	0.411804	54.53	-1.197	-0.9172	0.359
DPEP2	16	68021297	68034489	0.35112	rs187241218	rs9928014	0.02773	-14.35	0.919	0.9174	0.359
DLL1	6	170591294	170615653	0.05426	rs3013265	rs4710790	0.01431	10.45	1.701	0.9165	0.359387
CPM	12	69235977	69365350	0.04146	rs144058974	rs8181716	0.013814	-10.21	-0.431	0.9143	0.3605
WFIKKN2	17	48912011	48919714	0.15154	rs12603553	rs11079936	0.219	-39.74	-0.438	0.91263	0.3614
C3	19	6677715	6730573	0.0069	rs10416745	rs11569479	0.005016	-6.79	0.795	-0.9114	0.3621
PPM1A	14	60712470	60765805	0.01405	rs10143202	rs183404450	0.002548	-6.35	-0.0632	-0.91098	0.3623
S100A12	1	153346187	153348097	0.05795	rs8532	rs3014874	0.0289	-14.53	-0.67	0.91054	0.363
SLIT2	4	20253528	20622184	0.03448	rs9993087	rs587668	0.009457	-8.57	0.722	-0.9092	0.363
CRHBP	5	76248870	76276983	0.15082	rs145927885	rs10942798	0.192	-37.44	0.671	-0.90817	0.36379
SELM	22	31500758	31516055	0.01278	rs7291565	rs117551362	0.005419	7.38	-0.634	-0.9043	0.3658
ERO1L	14	53106633	53162618	0.00421	rs8019608	rs112898150	0.000838	4.71	-0.444	-0.90375	0.3661
CSF2RB	22	37309670	37336481	0.31357	rs2075937	rs2239749	0.245464	-42.1	-0.866	0.9032	0.3664
ASL	7	65540787	65559684	0.02175	rs11766473	rs11767072	0.008948	-8.95	0.35	-0.9007	0.367773
SNUPN	15	75890424	75918810	0.06007	rs369772209	rs7170787	0.04807	18.69	1.153	0.8998	0.3682
ASPH	8	62413115	62627199	0.05766	rs16928064	rs11775077	0.025757	-15.08	0.475	-0.8987	0.369
GABARAPL2	16	75600273	75611779	0.02189	rs16975847	rs2454867	0.01852	-11.7	0.238	-0.8961	0.37
GAS6	13	114523522	114567049	0.08791	rs7490130	rs6602909	0.0715	-22.74	-1.206	0.8964	0.37004
FCRLB	1	161691353	161697933	0.099	rs73024086	rs61801163	0.0479	18.76	-1.459	-0.89379	0.371
IGHG1	14	106202680	106209408	0.01878	rs58528939	rs11621145	0.013447	9.98	-0.932	-0.89383	0.3714
THSD1	13	52951302	52990508	0.28705	rs12429430	rs41292808	0.11142	28.4	-0.271	-0.8915	0.37266
SERPING1	11	57364860	57386644	0.28042	rs141840109	rs10896631	0.3255	-48.49	-0.779	0.89151	0.3727
TDGF1	3	46616024	46623947	0.42487	rs4682807	rs3806702	0.481	58.94	-0.761	-0.89126	0.3728
FGL1	8	17721889	17767874	0.17575	rs2588140	rs3739406	0.220796	40.11	-0.164	0.8886	0.374
EPHB6	7	142552823	142568847	0.20075	rs142194770	rs7789303	0.140539	31.88	-0.822	-0.8887	0.37415
FUT5	19	5865837	5870551	0.26913	rs149144223	rs778809	0.113488	-28.73	-0.619	0.8825	0.37749
PPIL1	6	36822603	36842579	0.23835	rs76207768	rs10440825	0.10258	-27.21	0.7945	-0.8791	0.379351
WISP2	20	43343485	43357150	0.15766	rs74462447	rs754077	0.057981	20.66	1.342	0.87783	0.38003
PLXNC1	12	94542353	94701451	0.50853	rs76785153	rs7971713	0.143891	-32.23	0.982	-0.8756	0.3812
SERPINA3	14	95078721	95090392	0.03891	rs78496488	rs6575449	0.017954	-11.66	-0.3031	0.87147	0.3835
DNAJA4	15	78556428	78574538	0.0062	rs12442418	rs11639191	0.00405	5.81	2.073	0.8709	0.3838
ADGRF5	6	46820259	46922680	0.1501	rs147688752	rs586024	0.23165	40.97	-0.977	-0.8691	0.384775
ECI2	6	4115927	4135831	0.0645	rs148419900	rs7757606	0.08395	-24.81	-0.869	0.869	0.384847
HEBP1	12	13127804	13153199	0.23558	rs74505410	rs11055175	0.168904	-34.98	-1.114	0.8663	0.3863
EDIL3	5	83236373	83680698	0.01274	rs35817048	rs10073371	0.00352	-5.87	2.171	-0.86572	0.38664
PLXNA4	7	131808091	132333447	0.04441	rs76260378	rs62622406	0.013922	-10.16	-0.785	0.8626	0.388338
ENTHD2	17	79202077	79212891	0.0054	rs77829512	rs61745945	-7.62e-05	-4.02	-0.83	-0.86218	0.3886
HPGDS	4	95219686	95264027	0.20218	rs17310498	rs10033662	0.153231	33.27	0.518	-0.86129	0.389
DYNLL2	17	56160780	56172903	0.07713	rs73995441	rs9902118	0.0644	21.65	-0.105	-0.86022	0.3897
C11orf68	11	65684281	65686533	0.07142	rs118107504	rs554169857	0.031177	15.05	0.765	0.85417	0.393
ANXA2	15	60639333	60695082	0.04041	rs71395155	rs12440452	0.02174	-13.49	-0.649	-0.8534	0.3934
CD58	1	117057156	117113661	0.03207	rs142866684	rs60612523	0.0155	10.81	1.308	0.8523	0.394
LSAMP	3	115521210	116858236	0.08755	rs11719103	rs1835674	0.0331	15.94	-0.986	-0.85141	0.3945
PPIE	1	40157854	40229586	0.1455	rs146916518	rs1046988	0.161	-34.36	-1.497	0.8486	0.396
SHBG	17	7517264	7536700	0.05799	rs191273168	rs11651783	0.0303	-15.03	0.813	0.84417	0.3986
SOD3	4	24791534	24802464	0.18885	rs141568002	rs2536512	0.047282	18.6	0.85282	-0.84342	0.399
LEFTY2	1	226124298	226129083	0.0791	rs114473515	rs360078	0.0483	-19.06	0.461	-0.83911	0.401
IL23R	1	67604590	67725662	0.01538	rs1495966	rs12569203	0.0024	-6.15	-0.733	0.8379	0.402
BDH2	4	103998749	104021027	0.04677	rs62327326	rs78336913	0.031242	16.45	-0.884	-0.83832	0.402
IL11RA	9	34650699	34661899	0.08134	rs17258783	rs11575578	0.10712	27.91	-0.709	-0.83481	0.4038
S100A7	1	153430220	153433127	0.33112	rs149444946	rs9436093	0.213	-39.24	-0.171	0.83473	0.404
HTN3	4	70894172	70902255	0.01781	rs116425692	rs78169960	0.0117	-9.35	1.37028	-0.82888	0.407
FAM177A1	14	35514113	35582336	0.21296	rs144835486	rs799473	0.209536	-38.91	-0.978	0.82738	0.408
FCRL1	1	157764193	157789910	0.08298	rs79024360	rs4971154	0.0829	-24.53	0.809	-0.82617	0.409
CCL22	16	57392695	57400101	0.06803	rs55828410	rs170364	0.01632	11.77	0.582	0.8255	0.409
SLPI	20	43880880	43883205	0.05447	rs189834797	rs2143943	0.02467	13.43	-1.21	-0.82131	0.41147
IL17RA	22	17565844	17596584	0.70416	rs9604738	rs4819959	0.316326	47.81	-0.272	-0.8212	0.4116
TNFRSF10D	8	22993101	23021540	0.00818	rs73222535	rs4460371	0.004982	-6.16	-0.508	0.8192	0.413
COL6A2	21	47518026	47552762	0.18107	rs13049759	rs35548026	0.04705	-18.56	-1.304	0.8144	0.415
GUK1	1	228327663	228336685	0.09996	rs114994798	rs61825157	0.143	32.17	-0.644	-0.81081	0.417
F7	13	113760102	113774999	0.27952	rs139600214	rs6046	0.32036	-48.3	0.589	-0.8098	0.41805
COL2A1	12	48366750	48398337	0.07915	rs2071358	rs719008	0.093752	-26.12	-0.805	0.807	0.4197
MMP8	11	102582527	102597781	0.05173	rs190650369	rs11225395	0.024796	-13.92	-0.359	0.8049	0.4209
IGSF3	1	117117021	117210377	0.06043	rs146308565	rs655735	0.0203	-12.19	-0.217	0.80171	0.423
ADM	11	10326620	10328944	0.00613	rs12362504	rs2923098	0.000331	5.18	0.697	0.80059	0.4234
SRGN	10	70847859	70864561	0.17612	rs55793716	rs2229498	0.066052	21.93	-0.675	-0.7998	0.4238
PKM2	15	72491370	72524163	0.00429	rs28379368	rs28379368	0.00208	-5.35	-1.263	0.7998	0.4238
PLA2G2A	1	20301924	20306909	0.27634	rs12729796	rs2307246	0.223	40.15	-0.427	-0.79952	0.424
RSPO2	8	108911544	109095870	0.00231	rs13272688	rs640068	0.002116	-4.47	0.799	-0.799	0.424
METTL24	6	110565143	110679552	0.05212	rs117524729	rs7767851	0.01198	10.14	-0.085	-0.7945	0.426924
PSMB4	1	151372036	151374413	0.07949	rs6587551	rs4603	0.152	-33.23	0.795	-0.795	0.427
ASAH2	10	51942538	52039480	0.3705	rs117297278	rs2842126	0.134254	31.21	-1.435	-0.7936	0.4274
DCTD	4	183811213	183839089	0.00563	rs868083	rs6552631	0.000739	4.41	0.613	-0.79175	0.429
MFGE8	15	89441914	89456612	0.06656	rs939590	rs12911703	0.07782	23.78	-0.918	-0.789	0.4301
SIRPG	20	1609798	1638425	0.08429	rs6042268	rs6043409	0.108276	28.06	-0.649	-0.78871	0.43028
KLKB1	4	187130133	187179625	0.07841	rs76605739	rs2304595	0.062513	21.43	-1.076	-0.78706	0.431
VAV1	19	6772719	6857377	0.04554	rs75014155	rs36097961	0.048077	-18.69	0.374	-0.7847	0.43265
KLK8	19	51499263	51505967	0.11625	rs11084034	rs10410942	0.07841	-23.88	-0.418	0.784	0.43301
GLIPR2	9	36136533	36163910	0.06877	rs145882406	rs10814339	0.04861	-18.83	0.722	-0.78349	0.4333
SAT2	17	7529552	7531194	0.02866	rs12942088	rs13894	0.00879	-9.71	0.668	0.78292	0.4337
HSPG2	1	22148737	22263803	0.0756	rs34143150	rs12742444	0.0573	20.58	0.191	-0.78185	0.434
PCDH10	4	134070449	134129761	0.05546	rs115646013	rs4864200	0.02446	-13.89	-0.711	0.78307	0.434
B4GALT6	18	29202209	29265799	0.21317	rs117618570	rs113222817	0.168467	-34.98	1.03	-0.78	0.4353
UNC5D	8	35092993	35654068	0.06753	rs78974512	rs3108622	0.037601	-17.3	-0.853	0.779	0.436
SRA1	5	139916925	139937262	0.13304	rs13190290	rs801460	0.106	27.83	1.753	0.77799	0.43658
STX7	6	132767006	132834337	0.04586	rs271116	rs3813356	0.02187	-13.25	-0.35	0.7749	0.438386
ERAP1	5	96096514	96143803	0.34597	rs17086472	rs30185	0.356	-50.71	0.918	-0.77128	0.44054
RETN	19	7733935	7735341	0.15585	rs11260022	rs34124816	0.030508	-14.93	-0.722	0.7703	0.44113
RCN3	19	50031260	50050219	0.00707	rs2303052	rs73582441	0.001103	4.32	-0.764	-0.764	0.44487
TPSAB1	16	1290380	1292555	0.30187	rs7201813	rs35116045	0.04873	20.87	0.875	-0.7643	0.445
ACOT13	6	24667263	24705293	0.0863	rs142965753	rs4544900	0.0259	14.4	-0.844	-0.762	0.446
PRTN3	19	840999	848175	0.03426	rs117766590	rs1060442	0.005011	-8.06	-2.011	0.761	0.44666
FKBP7	2	179328391	179343327	0.18172	rs184658426	rs1863671	0.16469	34.55	-0.072	0.7585	0.44815
AMY2A	1	104160049	104301348	0.4733	rs113727329	rs12076610	0.0733	24.09	1.492	0.75766	0.449
RNASE4	14	21152719	21169375	0.23615	rs76151206	rs1888560	0.112673	-28.53	-0.597	0.75577	0.4498
FABP2	4	120238405	120243293	0.17634	rs2389872	rs1799883	0.325812	48.49	-0.929	-0.75503	0.45
TNXB	6	32008930	32083111	0.39131	rs28366175	rs116298992	0.12549	-30.11	-1.603	0.7545	0.450525
FCGR3A	1	161511549	161520527	0.32822	rs180978155	rs10800573	0.412	54.36	-0.6831	-0.75366	0.451
PRSS22	16	2902731	2908171	0.07031	rs142545374	rs7204669	0.03963	17.13	-0.589	-0.7532	0.451
CST2	20	23804406	23807366	0.13742	rs6076099	rs4260306	0.100253	-27.59	-0.743	0.75219	0.45194
GUCA2B	1	42619081	42621491	0.0149	rs12119339	rs1047047	0.00965	9.29	0.959	0.75113	0.453
CPQ	8	97657470	98161882	0.24923	rs74670446	rs148684432	0.073058	-23.01	-0.541	0.7497	0.453
SERPINF1	17	1665323	1680859	0.20169	rs9902534	rs62088172	0.144	-32.4	0.878	-0.75003	0.4532
IL1RL2	2	102803466	102856462	0.11557	rs13031438	rs1960510	0.05147	-19.8	0.468	-0.7474	0.45484
FAM20B	1	178994939	179045702	0.04117	rs2492281	rs12568291	0.0117	9.61	0.18	0.74603	0.456
NCF1	7	74188309	74203720	0.28903	rs37624	rs148581667	0.094297	20.11	0.626	-0.7429	0.457567
MFAP4	17	19286755	19290503	0.1017	rs55661368	rs528684420	0.0242	-13.33	0.242	0.74252	0.4578
PPIF	10	81107225	81115090	0.01472	rs11002845	rs79510127	0.005743	-7	0.813	-0.74	0.4593
TPST2	22	26917962	26992681	0.05591	rs76229344	rs4275	0.033861	15.87	-1.924	-0.7399	0.4593
IL20RA	6	137321108	137366317	0.01758	rs9389487	rs1775296	0.00594	-6.81	-0.661	-0.7351	0.462294
MANBA	4	103551927	103682151	0.11053	rs223499	rs223490	0.212453	39.97	-0.032	-0.73375	0.463
PPIC	5	122358945	122372420	0.45101	rs115134136	rs17388251	0.271	-44.22	-0.194	0.73044	0.46512
TNC	9	117781854	117880536	0.52315	rs7034851	rs1138545	0.36783	51.52	0.793	0.73038	0.4652
ADH6	4	100123795	100140694	0.07629	rs147465378	rs62325239	0.097044	-26.54	-0.49	0.7287	0.466
MRVI1	11	10594638	10715535	0.04729	rs117223295	rs1075768	0.021385	-12.57	0.739	-0.7282	0.4665
CA10	17	49707674	50237377	0.09418	rs73989038	rs117399000	0.0312	-15.06	0.521	0.72632	0.4676
VEGFA	6	43737921	43754224	0.01823	rs2282412	rs6921438	0.01388	-10.52	0.726	-0.726	0.467839
ASGR1	17	7076750	7082883	0.06075	rs4796347	rs62061425	0.018	-11.55	1.107	-0.72582	0.4679
CPA4	7	129932974	129964020	0.42622	rs36105551	rs34587586	0.46478	-57.9	0.611	-0.722	0.470306
PKDCC	2	42275161	42285657	0.09315	rs59206144	rs13416595	0.04481	18.12	1.151	0.7213	0.47071
AMY2B	1	104096437	104122156	0.44915	rs113727329	rs12076610	0.0612	21.42	1.492	0.72024	0.471
HAGH	16	1845621	1877158	0.13001	rs71386662	rs116869551	0.07462	23.32	-0.606	-0.7209	0.471
HTATIP2	11	20385231	20405328	0.04717	rs10833299	rs10437608	0.043058	17.88	-0.72	-0.72	0.4715
TNFRSF1B	1	12227048	12269285	0.06344	rs188837995	rs519064	0.0347	-16.19	1.403	-0.71895	0.472
ADIPOQ	3	186560493	186576252	0.11006	rs266719	rs143257534	0.0358	-17.47	1.345	-0.71741	0.4731
GAS1	9	89559277	89562421	0.05558	rs12342165	rs4878043	0.00856	9.32	-0.78	0.71221	0.4763
PDGFD	11	103777917	104035107	0.11541	rs17101888	rs10791660	0.047001	-18.49	-1.164	0.71231	0.4763
ADH5	4	99992129	100009952	0.06273	rs72681991	rs62325239	0.069219	-22.43	-0.49	0.71176	0.477
MFNG	22	37865101	37882431	0.01482	rs2284038	rs8192548	0.015137	-11.15	0.577	-0.7079	0.479
LILRB5	19	54753279	54761164	0.43643	rs2361797	rs12975366	0.405162	-54.06	0.611	-0.7076	0.47917
IL6R	1	154377669	154441926	0.38332	rs12750774	rs4129267	0.528	61.74	1.161	0.70693	0.48
PSMB1	6	170844208	170862395	0.06469	rs2294183	rs3734763	0.13249	-31.05	-0.672	0.7062	0.480067
OBP2B	9	136080664	136084637	0.05287	rs7855969	rs4454354	0.0408	17.3	-0.915	-0.70477	0.481
GZMK	5	54320084	54330398	0.03102	rs6891823	rs2407827	0.0122	10.03	-1.381	-0.70392	0.48148
MESDC2	15	81238630	81282169	0.02212	rs75747236	rs73489798	0.01552	-11.25	0.996	-0.7035	0.4818
PDLIM1	10	96997329	97050769	0.13847	rs11596541	rs1328599	0.030062	-14.79	-1.404	0.7028	0.4822
CST4	20	23666277	23669675	0.05458	rs3761285	rs7263473	0.037751	-16.7	-0.319	-0.69969	0.48412
CBR1	21	37442239	37445464	0.1335	rs2284644	rs16993864	0.08399	-24.73	-0.524	0.6942	0.488
TCN1	11	59620273	59633962	0.27295	rs77237970	rs34324219	0.054065	-21.11	-0.604	0.69207	0.4889
PTN	7	136912088	137028520	0.05357	rs77569617	rs10255150	0.040897	17.31	-0.118	-0.6918	0.489082
CXCL2	4	74962757	74964913	0.00617	rs11725704	rs1893319	0.003955	6.54	1.168	0.69024	0.49
APOA5	11	116660083	116663136	0.15951	rs10750096	rs35120633	0.21183	39.14	1.068	0.68994	0.4902
DUSP28	2	241499471	241504673	0.09634	rs6730107	rs112548426	0.04681	-18.57	-0.03	-0.6881	0.49141
CTRB2	16	75238001	75241059	0.38782	rs117295180	rs1808427	0.28264	-45.29	-0.458	0.6848	0.493
CLEC4G	19	7793844	7798792	0.05853	rs10405586	rs1010046	0.0395	17.1	-0.232	-0.6852	0.49319
GALNT16	14	69725994	69823750	0.1643	rs115489887	rs12100668	0.046997	18.51	0.161	-0.68529	0.4932
ST6GALNAC2	17	74561459	74583038	0.00656	rs55870134	rs11077885	0.000141	4.28	0.765	-0.68438	0.4937
NEGR1	1	71861626	72748222	0.04195	rs79283677	rs12029938	0.00522	-6.86	-1.431	0.68346	0.494
NFASC	1	204797779	204991950	0.18841	rs35158267	rs6663324	0.129	30.58	0.495	0.68452	0.494
AHSG	3	186330849	186339107	0.17319	rs116511540	rs2518134	0.11	29.68	0.129	0.68165	0.4955
ADGRE2	19	14843204	14889372	0.38598	rs74565038	rs67023356	0.085624	24.9	-1.279	-0.6793	0.49693
CNTFR	9	34551430	34590138	0.11745	rs185509438	rs73645429	0.0362	-16.15	0.48	-0.67911	0.4971
NPW	16	2059927	2070756	0.11251	rs60599587	rs111276210	0.00838	-9.04	-2.34	0.6756	0.499
NPTXR	22	39214457	39240033	0.14449	rs79157023	rs4821839	0.093484	26.21	-0.634	-0.6749	0.4997
UNC5B	10	72972327	73062621	0.13879	rs72802553	rs7907590	0.011618	-11.11	1.342	-0.6731	0.5009
LILRB2	19	54777666	54785039	0.33336	rs7257613	rs383925	0.372729	51.87	-0.571	-0.6715	0.50189
GLRX	5	95087023	95158430	0.00945	rs68044534	rs6556884	0.00312	-6.33	-0.566	0.6711	0.50216
ARFIP1	4	153701089	153839615	0.04967	rs10021011	rs4619875	0.08699	25.07	0.669	0.669	0.503
MAPK3	16	30125426	30134827	0.08398	rs3087437	rs9932466	0.17198	35.6	-0.831	-0.6697	0.503
CTRB1	16	75252886	75260236	0.16513	rs113008909	rs8057145	0.11474	28.92	-0.514	-0.6701	0.503
INHBC	12	57828567	57845845	0.22299	rs113973631	rs2229357	0.49134	-59.54	0.629	-0.6694	0.5033
KIAA1279	10	70748559	70803300	0.00946	rs75583483	rs17471869	0.000542	5.68	-0.455	-0.6679	0.5042
C9	5	39284242	39424970	0.11258	rs55896535	rs696766	0.0222	-12.71	-1.669	0.66647	0.50511
RGMA	15	93578503	93632433	0.07674	rs72753788	rs10852188	0.02502	-14.33	0.724	-0.6661	0.5054
CD55	1	207494877	207560149	0.1014	rs115091535	rs1583090	0.235	-41.23	-0.642	0.66518	0.506
LBP	20	36974885	37005655	0.40262	rs6124026	rs2232613	0.216406	-39.54	0.11	0.66167	0.50818
HSPB1	7	75931990	75933612	0.28721	rs1636643	rs2908201	0.241565	-41.81	-1.405	0.6608	0.508757
DCI	16	2289403	2302301	0.00808	rs55650311	rs55650311	0.00769	-7.79	0.658	-0.658	0.511
LY9	1	160765864	160798051	0.14097	rs61801649	rs12128261	0.124	30.13	0.329	-0.65585	0.512
MMP19	12	56229217	56236750	0.10332	rs79104523	rs56180965	0.008361	-8.18	-0.193	-0.6556	0.5121
APOL3	22	36536378	36562225	0.28161	rs136189	rs132631	0.311155	47.39	-0.512	-0.6555	0.5121
NLGN1	3	173114074	174004434	0.05058	rs75738537	rs497383	0.0204	12.35	-0.489	0.65497	0.5125
A4GALT	22	43088127	43117304	0.07726	rs117102323	rs8138197	0.068165	-22.27	0.397	-0.6541	0.5131
FLII	17	18148129	18162052	0.05435	rs145840264	rs145840264	0.0185	11.67	0.653	0.653	0.5138
CACYBP	1	174968300	174981163	0.05079	rs142666187	rs16847450	0.101	-27.06	-0.653	0.653	0.514
ACE	17	61554422	61575741	0.30581	rs72841402	rs4353	0.281	-45.05	-0.453	0.65183	0.5145
AMPD2	1	110158726	110174673	0.01093	rs11102983	rs523786	0.00254	-5.42	0.651	-0.651	0.515
TALDO1	11	747415	765012	0.00828	rs11246211	rs10902210	0.003125	5.64	-0.649	-0.649	0.5163
CCL3	17	34415602	34417515	0.134	rs117761287	rs2015086	0.0882	25.26	-0.62	-0.64912	0.5163
SPINK6	5	147582357	147594700	0.08603	rs6896988	rs11741093	0.14	31.82	0.168	-0.64803	0.51697
CD5L	1	157800701	157868046	0.12573	rs72711975	rs2765501	0.068	22.19	0.049	0.64858	0.517
CXCL12	10	44865613	44881941	0.03624	rs2818912	rs1023264	0.012705	-9.8	0.648	-0.6459	0.5183
NT5E	6	86159302	86205509	0.13098	rs190618220	rs6903114	0.09176	-25.82	0.834	-0.6458	0.51839
VNN2	6	133065009	133084598	0.39772	rs143098434	rs9493425	0.24884	-42.37	1.216	-0.6456	0.518539
CRTAC1	10	99624757	99790585	0.25116	rs34533779	rs684225	0.06637	-21.95	-0.566	-0.6447	0.5191
SEMA3G	3	52467051	52479119	0.05732	rs113474502	rs2016575	0.0358	-16.16	-1.823	0.64398	0.5196
MANF	3	51422722	51426828	0.04422	rs11715034	rs4611808	0.0295	-14.73	-0.015	-0.64286	0.5203
CD33	19	51728320	51747115	0.5964	rs55744949	rs3865444	0.393413	-53.32	-0.139	0.642	0.52087
EFNA5	5	106712595	107006638	0.09505	rs34527	rs7734574	0.0368	-16.83	1.899	-0.64159	0.52114
LEPR	1	65886335	66107242	0.17	rs112167028	rs2376018	0.454	-57.24	-0.611	0.64025	0.522
TMEM132B	12	125670932	126146923	0.05523	rs11833758	rs3825381	0.040488	-17.21	0.323	-0.6395	0.5225
PAPPA	9	118916070	119164600	0.00326	rs10983184	rs10983184	0.00233	4.44	0.638	0.638	0.5235
PHPT1	9	139743176	139745479	0.10386	rs1832146	rs872463	0.12056	-29.58	-0.149	-0.63488	0.5255
PDGFD	11	103777917	104035107	0.15402	rs482600	rs10895596	0.116291	-28.99	-0.811	0.63388	0.5262
MRC2	17	60705031	60770958	0.27258	rs113225922	rs146385050	0.0527	-19.64	0.952	-0.63305	0.5267
PIANP	12	6802957	6809981	0.06538	rs142707109	rs11064306	0.028713	14.59	-0.276	-0.6325	0.5271
NCR3	6	31556672	31560783	0.27617	rs143354909	rs986475	0.06555	-21.8	-0.014	-0.6285	0.529664
CCL18	17	34391632	34399392	0.23388	rs12451192	rs2015086	0.174	35.46	-0.62	-0.62776	0.5302
AP1G2	14	24028774	24037279	0.07426	rs28667752	rs12886523	0.031243	-15.15	0.268	0.62695	0.5307
OAF	11	120081740	120101043	0.20917	rs508205	rs2508490	0.159983	-34.02	-0.55	-0.6268	0.5308
AGRN	1	955500	991498	0.0733	rs115834287	rs4970350	0.0412	17.29	-0.374	-0.62574	0.531
CR1	1	207669492	207815110	0.33889	rs144864106	rs679515	0.114	-28.77	1.144	-0.62204	0.534
SPINT2	19	38734675	38783255	0.2563	rs8104572	rs71354995	0.276703	-44.71	-0.156	0.6198	0.53537
JAG1	20	10618332	10654647	0.01592	rs112684608	rs78896696	0.003641	5.97	0.252	-0.61735	0.53701
LGALS9	17	25956824	25976586	0.03611	rs147475426	rs4239242	0.0365	-17.48	0.231	-0.61551	0.5382
FLRT3	20	14303631	14318260	0.38155	rs6110196	rs1932953	0.286093	45.53	0.558	0.61507	0.53851
USP15	12	62654119	62811211	0.09869	rs11174358	rs11612349	0.140268	32.01	0.547	-0.6132	0.5397
IL1RAP	3	190231840	190377539	0.40058	rs61678423	rs7611887	0.419	-55.02	-0.628	0.61252	0.5402
CMPK1	1	47799462	47844511	0.10147	rs12144626	rs35687416	0.0377	-16.54	-0.767	-0.61125	0.541
EPHA4	2	222282747	222438922	0.07237	rs56263717	rs12995875	0.02857	-15.54	0.675	-0.6103	0.54169
LEFTY2	1	226124298	226129083	0.24944	rs907186	rs360077	0.259	-43.22	0.109	-0.60996	0.542
CCT5	5	10250041	10266501	0.00744	rs76107825	rs3844305	0.00717	-7.44	0.608	-0.608	0.54319
GPC1	2	241375080	241407493	0.11564	rs10170009	rs1126920	0.12516	30.09	-0.712	-0.6074	0.54358
CX3CL1	16	57406389	57418956	0.02161	rs1167513	rs62037115	0.02523	13.56	0.546	0.6071	0.544
NTN1	17	8924827	9147317	0.13331	rs77511930	rs9897200	0.0874	-25.17	-0.874	0.60586	0.5446
DDX19B	16	70323566	70369208	0.03402	rs143928366	rs138325325	0.01178	-9.86	1.44	-0.6051	0.545
HYAL1	3	50337321	50349812	0.0455	rs76644847	rs116482870	0.0152	-10.72	0.638	-0.60496	0.5452
ACAA1	3	38144620	38178733	0.09243	rs72862229	rs2229528	0.0429	-17.66	-0.949	0.60432	0.5456
PREP	6	105721093	105901937	0.20479	rs115414906	rs1051484	0.16438	34.47	-0.062	0.6031	0.546436
LGALS4	19	39292311	39303585	0.0655	rs75737981	rs9304578	0.037901	-16.58	0.884	-0.6018	0.54731
MMP13	11	102813724	102826461	0.00759	rs117465487	rs655316	0.00661	-7.47	0.6	-0.6	0.5485
PPCS	1	42921788	42939056	0.03906	rs12404583	rs4660635	0.0972	-26.53	-0.708	0.59833	0.55
FCN3	1	27695601	27701315	0.09392	rs76303419	rs111257457	0.0497	-19.12	0.211	-0.59799	0.55
UPP1	7	48128225	48148333	0.01051	rs7341420	rs3763505	0.008189	8.58	0.597	0.597	0.550507
B4GALT1	9	33104080	33167354	0.133	rs1556253	rs7019909	0.07296	22.97	0.622	0.59188	0.5539
ISLR2	15	74392652	74430881	0.09191	rs28542042	rs11632698	0.02926	-16.37	0.741	-0.5919	0.5539
NEO1	15	73344051	73597546	0.07191	rs77911922	rs13379875	0.05916	-20.7	-0.444	0.59	0.5552
CAMP	3	48264837	48266981	0.00526	rs116426957	rs11716848	0.00226	4.32	0.718	-0.58906	0.5558
CAPG	2	85621876	85645555	0.18254	rs147482528	rs62623452	0.07879	-24.16	-0.45	0.5879	0.55658
C8G	9	139839637	139841427	0.12842	rs10870120	rs7862602	0.12423	-30.11	0.431	-0.58773	0.5567
FCRL6	1	159770301	159786047	0.06467	rs7519748	rs6656979	0.0662	-22.28	-0.172	0.58644	0.558
CALCB	11	14926543	15103888	0.02739	rs77823420	rs7104596	0.033138	-15.97	0.771	-0.58571	0.5581
TMEM132A	11	60691932	60704631	0.28003	rs4939452	rs555835	0.23082	40.81	0.691	0.58464	0.5588
TSTD1	1	161007421	161008767	0.26994	rs12023218	rs11580071	0.176	35.71	-0.662	-0.58322	0.56
MIA	19	41277553	41283395	0.14926	rs4803380	rs2607421	0.244003	42.12	1.108	0.5756	0.56491
ALCAM	3	105085753	105295744	0.06316	rs76991445	rs751554	0.0227	-13.42	-0.411	0.57531	0.5651
GFRA1	10	117816436	118036315	0.0641	rs180620	rs11197582	0.046093	18.49	-0.571	-0.5751	0.5652
ITIH3	3	52828784	52843025	0.37047	rs76553845	rs2535629	0.211	39.05	0.635	0.57464	0.5655
MTAP	9	21802635	21937650	0.00287	rs7027989	rs1345026	0.00187	-5.15	-0.573	0.573	0.5666
CLEC11A	19	51226621	51228975	0.10631	rs12984286	rs193222348	0.083258	24.69	-0.6679	-0.5713	0.56779
FST	5	52776456	52782964	0.00519	rs188578758	rs546067954	-7.42e-05	4.23	-1.216	-0.57076	0.56816
KNG1	3	186435137	186462199	0.02637	rs59629826	rs5030062	0.0174	11.35	-0.391	-0.56883	0.5695
FAM20A	17	66531254	66597508	0.05851	rs139149049	rs12453086	0.0275	-14.24	1.39	-0.56758	0.5703
IGF2R	6	160390114	160534539	0.34715	rs143709109	rs2282140	0.17549	35.59	0.137	0.5665	0.571073
HARS	5	140052620	140071122	0.05935	rs17286891	rs112352450	0.00767	7.68	0.266	-0.56095	0.57483
IL7R	5	35852797	35879705	0.00915	rs149006892	rs10058572	0.00975	-8.75	-0.561	0.56066	0.57503
C3	19	6677715	6730573	0.00759	rs11569470	rs11569479	0.003991	-6.51	0.795	-0.5597	0.57568
ITIH2	10	7745279	7791483	0.15906	rs111939138	rs17142907	0.225512	40.37	-0.592	-0.5592	0.576
CRELD1	3	9975477	9987097	0.22371	rs28525456	rs6762702	0.342	-49.7	-0.126	0.55789	0.5769
PDXK	21	45138975	45182188	0.03824	rs7282403	rs79343092	0.0136	-10.13	0.177	-0.5565	0.578
NAGK	2	71291474	71306938	0.10153	rs35381972	rs11680831	0.12057	-29.53	-0.937	0.5547	0.5791
AMY1A	1	104198382	104207176	0.40275	rs78330572	rs78811372	0.037	-16.57	-0.293	0.55204	0.581
CLSTN1	1	9788984	9884042	0.21041	rs41280772	rs35331030	0.106	27.8	-1.122	-0.55065	0.582
CLEC11A	19	51226621	51228975	0.11178	rs117083993	rs116924815	0.088325	25.42	-0.749	-0.5493	0.58283
SERPINA11	14	94908801	94919137	0.09915	rs56339332	rs55911632	0.030851	-15.12	-0.285	0.54836	0.5834
PCSK9	1	55505120	55530525	0.08479	rs148238018	rs11591147	0.0296	-14.96	0.553	-0.5469	0.584
AHCYL1	1	110527387	110566364	0.00916	rs11102099	rs7517624	0.000952	5.07	0.321	-0.54415	0.586
SHC1	1	154934774	154946871	0.00997	rs71628639	rs114272540	0.00298	-5.46	2.237	-0.54458	0.586
PIP	7	142829170	142836832	0.23817	rs940697	rs4726600	0.03131	16.09	-1.249	-0.5437	0.586627
CST1	20	23728199	23731905	0.124	rs116879662	rs4260306	0.102783	-27.27	-0.743	0.54366	0.58667
UGT1A6	2	234600253	234681946	0.06011	rs148359050	rs887829	0.06198	-21.31	-0.054	0.5434	0.58685
PGLYRP3	1	153269592	153285428	0.05244	rs986760	rs55991125	0.0147	-10.53	-0.094	-0.5404	0.589
MYOC	1	171604557	171621828	0.2632	rs12139610	rs235879	0.0918	25.76	0.289	0.53813	0.59
CHL1	3	238446	451100	0.07969	rs10222583	rs990284	0.0427	-17.68	-0.53	0.53887	0.59
PILRA	7	99965153	99997719	0.4249	rs1476679	rs1859788	0.515673	-61.01	0.477	-0.5387	0.59009
SPINT3	20	44141101	44144262	0.05571	rs144373758	rs6032259	0.081334	24.43	0.641	0.53403	0.59332
IL1R2	2	102608422	102645006	0.14928	rs13023233	rs2310170	0.12675	-30.4	-0.267	0.5318	0.5949
TCL1A	14	96176284	96180533	0.0318	rs76851329	rs78986913	0.020449	-12.32	-0.556	0.53075	0.5956
PRDX1	1	45976586	46008404	0.08447	rs148031621	rs11211133	0.0443	17.95	-0.771	-0.53069	0.596
PILRA	7	99965153	99997719	0.37083	rs117864261	rs1859788	0.465302	-57.95	0.477	-0.5301	0.596073
TNFSF13B	13	108903588	108960832	0.01004	rs111885619	rs150861794	0.00305	6.06	-0.613	0.5285	0.59717
NUDT12	5	102884556	102898491	0.03735	rs12518344	rs11242495	0.026	-13.92	0.528	-0.528	0.5975
AP2A2	11	924894	1012245	0.02303	rs117216314	rs4963151	0.012521	-10.08	0.135	0.52724	0.598
NOTCH3	19	15269849	15311806	0.01756	rs12981957	rs4808238	0.011483	9.31	0.825	0.5271	0.5981
DKK1	10	54074041	54077802	0.1963	rs117629250	rs11003047	0.055424	20.94	1.017	0.5269	0.5983
SPATA20	17	48620419	48633213	0.14696	rs74387869	rs9890200	0.213	-39.21	0.822	-0.52654	0.5985
ESAM	11	124622479	124632186	0.0889	rs55661361	rs12541	0.053816	-19.89	0.119	0.52633	0.5987
VWA1	1	1370241	1378262	0.06831	rs1153094	rs116279124	0.0668	-22.28	-0.881	0.5261	0.599
DTD2	14	31915242	31926712	0.14497	rs4981137	rs17097898	0.046087	-18.44	1.362	-0.52464	0.5998
DNAJC10	2	183580982	183659191	0.04477	rs16823696	rs288334	0.01949	12.23	-0.18	-0.524	0.60028
CCL25	19	8117202	8127544	0.20655	rs36248	rs74959615	0.195089	-37.54	-0.765	0.523	0.601
VTA1	6	142468299	142545822	0.04631	rs112683345	rs225628	0.03434	-15.87	-1.491	0.5221	0.601619
RTP4	3	187086173	187089864	0.13668	rs146871784	rs1878861	0.125	-30.09	-0.008	0.5202	0.6029
NETO1	18	70409549	70535381	0.00596	rs12961224	rs2032998	0.000353	4.53	-0.38	0.52	0.603
CR2	1	207627575	207663240	0.04287	rs78921403	rs61821130	0.0093	-8.97	0.916	-0.51561	0.606
LY75	2	160659866	160761267	0.49106	rs4407212	rs56186131	0.36712	51.38	-0.086	-0.5117	0.60884
NOTCH1	9	139388885	139440500	0.03739	rs117660785	rs9411207	0.01574	10.73	-0.181	-0.51103	0.6093
CFHR5	1	196946686	196978808	0.39818	rs150638768	rs35662416	0.0609	-22.33	-0.02	0.51071	0.61
INHBC	12	57828567	57845845	0.00893	rs541005025	rs6581138	0.004272	5.69	-0.509	-0.509	0.6108
POSTN	13	38136720	38172981	0.08906	rs9576299	rs7329947	0.02727	14.08	0.376	0.5074	0.61188
C1QTNF3	5	34017963	34043318	0.03208	rs10074193	rs840390	0.00894	-8.56	1.352	-0.50732	0.61193
C1R	12	7187518	7245136	0.07994	rs7313471	rs143238956	0.080694	-2.58	-0.563	0.5069	0.6123
ADAM23	2	207308256	207485851	0.42113	rs114477007	rs1448903	0.11445	29.55	0.003	-0.5033	0.61473
RSPO4	20	939095	982954	0.04057	rs56982547	rs75904281	0.009482	-9.82	0.083	-0.50321	0.61482
TMEFF1	9	103235431	103339918	0.03143	rs10124232	rs10989102	0.01112	-9.47	0.706	-0.50251	0.6153
CCL17	16	57438679	57449975	0.05517	rs112877683	rs4396523	0.04	17.09	1.022	0.5006	0.617
PRKCA	17	64298731	64806861	0.09878	rs75563915	rs61762372	0.0439	17.84	-0.142	-0.49912	0.6177
F10	13	113777113	113803843	0.12796	rs34025513	rs3211757	0.03647	16.42	0.154	-0.4989	0.61782
KLK13	19	51558883	51568371	0.12041	rs73044630	rs2569459	0.06991	-22.53	-0.765	0.4989	0.61784
VOPP1	7	55503749	55640681	0.01666	rs4948048	rs117042408	0.014339	-10.22	0.204	0.4986	0.618067
SELL	1	169659806	169680843	0.2733	rs4656682	rs4987353	0.145	-32.38	-0.549	0.49574	0.62
CLMP	11	122940580	123065956	0.07886	rs7120168	rs2302605	0.093958	26.22	0.494	0.49541	0.6203
FAM3D	3	58619673	58652561	0.05865	rs12638053	rs7433100	0.0331	15.87	0.925	0.49438	0.621
AZGP1	7	99564343	99573665	0.09743	rs2525555	rs1981550	0.112418	-28.56	0.364	-0.4939	0.621366
CLSTN2	3	139654027	140296239	0.12319	rs1600403	rs9863263	0.0383	-16.85	0.786	-0.49338	0.6217
DCLK1	13	36342789	36705519	0.04553	rs188210724	rs7339267	0.02836	15.24	-0.999	-0.4925	0.62237
APOA1BP	1	156561548	156579299	0.09228	rs76102184	rs41267389	0.119	-29.5	0.155	-0.49155	0.623
LANCL1	2	211295973	211342376	0.01485	rs2270476	rs17552879	0.00888	8.13	-0.185	-0.4878	0.62571
PNLIPRP2	10	118380465	118404654	0.28711	rs7904117	rs4751995	0.36881	51.59	-0.438	-0.4848	0.6278
CCL8	17	32646454	32648421	0.29104	rs117216248	rs3138037	0.344	-49.88	0.339	-0.4845	0.628
NLGN2	17	7308193	7323179	0.05043	rs9899036	rs150452493	0.0229	-13.37	-0.15	0.48312	0.629
CTSZ	20	57560741	57583293	0.02545	rs79843552	rs75940688	0.019924	-12.14	-1.07	0.48246	0.62948
EPHB2	1	23037332	23247993	0.15603	rs59832568	rs2043970	0.1	-27.07	-0.229	0.4767	0.634
F10	13	113777113	113803843	0.1322	rs3211719	rs3211757	0.03809	16.75	0.271	-0.4758	0.63418
SEMA7A	15	74701630	74726299	0.01788	rs28603342	rs78994380	0.00591	-6.89	-1.027	0.4745	0.6352
ERAP2	5	96211690	96255407	0.21865	rs72772062	rs2910686	0.478	58.7	-0.85	-0.47331	0.63599
CAT	11	34460481	34493607	0.09623	rs11032656	rs4756148	0.042283	-17.58	0.583	0.47328	0.636
C6	5	41142218	41261540	0.29663	rs79230632	rs191791682	0.0552	-20	0.193	-0.47288	0.6363
SBDS	7	66452667	66460574	0.19429	rs62466579	rs79344818	0.09158	-26.4	0.332	-0.4713	0.637405
CHST11	12	104849073	105155792	0.16039	rs111789728	rs1704878	0.135637	-31.38	-0.081	0.4704	0.6381
CLIC4	1	25071873	25170812	0.05049	rs61772766	rs4649017	0.0317	-15.24	-0.267	0.46708	0.64
KLK11	19	51525472	51531295	0.26011	rs117025461	rs62115743	0.164939	-34.55	0.86	-0.467	0.64052
PNLIPRP1	10	118349897	118368687	0.07206	rs11817441	rs7906926	0.021035	-12.48	0.084	0.4655	0.6416
BOC	3	112929850	113006306	0.07114	rs115551340	rs3856718	0.0336	16.16	-0.436	0.46122	0.6446
FUT8	14	65877310	66210839	0.20344	rs11851530	rs8020305	0.052178	-20.95	0.185	-0.46084	0.6449
SHMT1	17	18231174	18266877	0.19098	rs186369917	rs4398149	0.202	38.2	-0.165	-0.45522	0.6489
PGLYRP2	19	15579456	15609767	0.13338	rs565465669	rs10164310	0.044805	-18.08	1.6786	-0.4538	0.64995
CRTAM	11	122709208	122743351	0.11801	rs140345204	rs2370794	0.040466	17.16	-1.131	-0.45219	0.6511
SLITRK6	13	86366925	86380818	0.07463	rs9547192	rs9547187	0.04169	-17.51	0.912	-0.4516	0.65153
TMEM2	9	74298282	74431606	0.03624	rs11143061	rs1410988	0.02284	13.09	0.451	0.451	0.652
EIF4B	12	53400066	53435999	0.00841	rs34251637	rs115019703	0.002832	-4.7	-0.451	0.451	0.652
TMEM190	19	55888194	55889614	0.28244	rs11672000	rs4806666	0.342338	-49.7	0.191	-0.451	0.652
ALAD	9	116148592	116163570	0.37231	rs187098339	rs8177797	0.0642	-21.56	-0.591	0.44909	0.6534
ACAN	15	89346667	89418584	0.03556	rs146357335	rs34949187	0.00803	-10.06	-0.555	-0.4483	0.6539
IL27RA	19	14142574	14164030	0.46807	rs138232524	rs35026308	0.279426	-44.92	0.486	-0.446	0.65557
CHKB	22	51017388	51039884	0.04118	rs150685861	rs5770922	0.022751	-12.97	0.544	-0.446	0.6556
GXYLT1	12	42475647	42538676	0.22484	rs117569259	rs139695917	0.076779	23.59	1.16975	0.4458	0.6557
LTA4H	12	96394531	96437298	0.01992	rs76309294	rs2247570	0.010028	8.59	0.027	0.4453	0.6561
HAVCR1	5	156456424	156486130	0.09816	rs114729396	rs13173581	0.0867	-25.06	1.364	-0.44376	0.65721
ADSSL1	14	105190566	105213662	0.01694	rs149710923	rs10142660	0.005586	7.35	-0.297	0.44355	0.6574
HSPA13	21	15743436	15755805	0.0312	rs2822656	rs2822638	0.02628	-13.81	0.442	-0.442	0.658
GMPR2	14	24701628	24708448	0.17871	rs12590407	rs34354104	0.079308	-23.95	0.729	-0.44256	0.6581
HHIP	4	145567308	145666423	0.0287	rs115900720	rs11727676	0.01401	10.34	-0.316	0.44095	0.659
IL18BP	11	71709659	71716761	0.00883	rs74983801	rs17884883	0.004719	-5.98	0.441	-0.441	0.6592
TESC	12	117476728	117537284	0.05071	rs73203845	rs10850746	0.055747	-20.23	1.163	-0.441	0.6592
CLPS	6	35762759	35765121	0.2757	rs141748353	rs9380534	0.08079	24.2	-1.7788	-0.4397	0.660164
SLAMF6	1	160454820	160493052	0.06053	rs75978735	rs1041067	0.0466	-18.66	-0.08	0.43828	0.661
GREM2	1	240652873	240775455	0.0076	rs9728484	rs116135446	0.0037	5.48	0.438	0.438	0.661
PPIH	1	43124006	43142429	0.00868	rs11210729	rs78676038	0.00311	6.67	-0.308	-0.43729	0.662
WISP1	8	134203282	134243933	0.08165	rs146458434	rs60282000	0.037253	-16.59	-0.067	0.4346	0.664
FGFBP3	10	93666341	93669243	0.15666	rs12255176	rs11186737	0.153907	-33.33	0.13	-0.433	0.665
ENPP7	17	77704705	77716018	0.2973	rs56291049	rs8077074	0.37	52.08	0.697	0.43276	0.6652
CBLN4	20	54572413	54580575	0.08579	rs11696834	rs4811612	0.025308	13.56	0.736	0.43262	0.66529
FAM213A	10	82167585	82196871	0.00709	rs72817364	rs10788623	0.001725	-5.54	-0.426	0.426	0.6701
RGMB	5	98104354	98134347	0.06865	rs62369955	rs2368553	0.057	20.4	0.277	-0.42553	0.67045
TXNL4B	16	72078188	72128330	0.12961	rs116881683	rs116891509	0.04058	17.51	0.12	0.4254	0.671
CCL23	17	34340096	34345009	0.43285	rs117761287	rs712048	0.0712	-22.79	-1.965	0.42039	0.6742
CD109	6	74405508	74538040	0.34542	rs76177823	rs6925924	0.26694	43.96	0.282	-0.4203	0.674249
LUM	12	91496406	91505271	0.12144	rs138652893	rs3782580	0.014368	-11.95	0.597	-0.4202	0.6744
KPNA6	1	32573657	32642164	0.03535	rs34572877	rs72666741	0.0399	17.09	0.419	0.419	0.675
CD86	3	121774209	121839986	0.01529	rs76813144	rs77832668	-3.8e-05	4.21	-1.297	-0.41842	0.6756
TNFSF12	17	7452375	7461207	0.01458	rs9907657	rs62059804	0.0105	9.47	-0.418	-0.418	0.6759
LRP4	11	46878268	46940193	0.13522	rs61897779	rs2306029	0.101858	-27.12	-0.279	0.41632	0.6772
MMP9	20	44637547	44645200	0.04624	rs17577	rs8113877	0.035061	-16.28	0.433	0.4145	0.67851
ITIH1	3	52811611	52826084	0.2007	rs80271235	rs1042779	0.224	-40.33	0.402	-0.41356	0.6792
SFRP4	7	37945534	38065297	0.07458	rs141315296	rs2598109	0.029307	-14.92	-0.395	0.4131	0.679561
PDCD6	5	271736	315089	0.03902	rs114456580	rs56075848	0.00582	6.93	0.651	0.41243	0.68002
PSAT1	9	80912041	80945009	0.06013	rs111930510	rs1929402	0.04883	19	0.967	0.41201	0.6803
NELL1	11	20691097	21597232	0.16197	rs2120306	rs8176786	0.108537	28.12	0.175	0.40909	0.6825
ANXA1	9	75766781	75785309	0.03397	rs7018979	rs2795108	0.0122	10.29	0.061	-0.40887	0.6826
MDGA2	14	47308832	48144808	0.31916	rs7147441	rs145891385	0.06205	21.22	1.289	0.40823	0.6831
PTPRU	1	29563028	29653325	0.07169	rs7538470	rs2179795	0.0253	-13.69	-0.927	0.4073	0.684
ADH1A	4	100197526	100212160	0.12179	rs1693439	rs28364331	0.056308	-20.3	0.434	-0.40752	0.684
ATXN3	14	92510840	92572965	0.12546	rs72705341	rs1051340	0.155344	-33.53	-1.115	0.40669	0.6842
SEMA4A	1	156117157	156147543	0.06382	rs1052067	rs12401997	0.0338	15.77	-0.5	-0.40608	0.685
PLXND1	3	129274057	129325519	0.18218	rs35031260	rs1108584	0.0497	20.5	-0.899	-0.40571	0.685
BTN3A3	6	26440700	26453643	0.4582	rs10946808	rs9393711	0.2584	-43.2	-0.079	-0.403	0.687
ARRB1	11	74971166	75062749	0.13292	rs3133186	rs504683	0.1173	29.15	0.358	0.40253	0.6873
LGALS3BP	17	76967320	76976029	0.03306	rs4789973	rs3826311	0.0104	10.05	1.125	0.40203	0.6877
SCO2	22	50961997	50964890	0.01816	rs5770902	rs11479	0.011798	-9.55	0.274	-0.4009	0.6885
XPNPEP1	10	111624524	111683311	0.0337	rs79931080	rs3862006	0.033955	16.57	-0.859	-0.3995	0.6896
IGFBP7	4	57896939	57976551	0.1029	rs12500068	rs1718860	0.101743	-27.56	0.809	-0.39915	0.69
GSTZ1	14	77787339	77797940	0.26234	rs755072	rs7975	0.302694	46.75	-0.139	-0.3979	0.6907
XCL2	1	168510006	168513235	0.02332	rs10737540	rs1998510	0.0154	10.68	-0.393	-0.393	0.694
IGFBP3	7	45951844	45961473	0.12873	rs77948733	rs148562589	0.038664	16.99	-0.686	-0.392	0.695091
PNP	14	20937113	20945248	0.25605	rs17277368	rs1049564	0.127699	-30.47	0.021	0.39066	0.696
EDAR	2	109510927	109605828	0.14637	rs62152245	rs75147553	0.061	20.99	-0.549	-0.3902	0.69637
CTSE	1	NA	206317459	0.0254	rs141145750	rs78554767	0.000566	4.5	-1.378	0.38872	0.697
RTN4R	22	20228938	20270769	0.16685	rs78871761	rs75766	0.061152	-21.05	0.729	-0.3886	0.6976
PIANP	12	6802957	6809981	0.05121	rs142707109	rs7959658	0.018056	11.61	-0.115	-0.3882	0.6979
S100A6	1	153507075	153508720	0.03502	rs310108	rs60969679	0.0197	12.14	0.105	0.38863	0.698
IL18R1	2	102927989	103015237	0.16442	rs17801985	rs2001461	0.27917	-44.98	-0.5609	0.3862	0.69932
COLEC12	18	316737	500722	0.08884	rs62090089	rs2846666	0.018444	11.84	-0.377	-0.386	0.6994
PRCP	11	82533978	82681626	0.05268	rs78657689	rs2229437	0.034518	15.83	-0.22	-0.38603	0.6995
ADK	10	75910960	76469721	0.01075	rs117195084	rs7099085	0.001771	5.95	-1.659	-0.3845	0.7006
ART3	4	76932337	77033955	0.09853	rs7697073	rs4859610	0.056013	-20.16	0.588	-0.38463	0.701
LGALS7	19	39261608	39282394	0.00416	rs8104072	rs8104072	0.002757	5.08	0.383	0.383	0.70172
FREM2	13	39261214	39461268	0.01892	rs2442379	rs9603418	0.00737	8.64	-1.203	-0.383	0.70176
EDDM3A	14	21214046	21216539	0.01405	rs12589818	rs34552133	0.008686	-8.25	-0.38	0.38	0.7039
TARS	5	33440802	33468196	0.03555	rs13166331	rs3777083	0.0142	-10.3	-0.653	0.379	0.70469
CRLF1	19	18683030	18718551	0.03827	rs4808814	rs141412226	0.036998	16.4	0.3387	0.3789	0.70474
HADH	4	108910870	108956397	0.0211	rs1355990	rs72890511	0.006993	8.47	0.3	0.37801	0.705
YWHAZ	8	101928751	101965616	0.01463	rs3019260	rs12335167	0.001866	5.2	-1.432	-0.3788	0.705
SIGLEC14	19	52145806	52150054	0.52882	rs7248908	rs872629	0.214229	-39.37	-0.469	0.3776	0.70571
BCAM	19	45312328	45324678	0.10822	rs73048316	rs563366239	0.038406	16.73	-0.2234	-0.3742	0.70827
F2	11	46740746	46761056	0.08857	rs183452254	rs1799963	0.031647	15.25	0.308	0.37289	0.7092
CD97	19	14491313	14519537	0.02348	rs185882225	rs3786656	0.00351	6.68	0.5069	-0.3725	0.70949
S100A4	1	153516089	153522612	0.01561	rs150059283	rs79399329	0.00438	6.82	-0.397	0.37194	0.71
AKR1C3	10	5077546	5149878	0.01239	rs140398901	rs4880709	0.007828	-7.76	-0.321	-0.3709	0.7107
COL6A1	21	47401684	47424964	0.42625	rs75094098	rs1053312	0.50453	-60.33	0.2	-0.3696	0.712
FCN1	9	137795078	137809758	0.18904	rs9409919	rs7037264	0.11636	28.99	-1.154	-0.36652	0.714
IMPA1	8	82569149	82598566	0.01428	rs142109467	rs2142316	0.007294	-8.23	0.392	0.3656	0.715
CEL	9	135937368	135947248	0.05484	rs117309720	rs2075733	0.01444	10.56	-0.58	0.36483	0.7152
HTRA1	10	124218067	124274423	0.05346	rs41302733	rs7074542	0.014598	-10.57	-0.437	-0.3636	0.7161
SERPINH1	11	75273101	75283828	0.05811	rs145165645	rs599816	0.02143	12.66	-0.162	0.36333	0.7164
SLAMF7	1	160708847	160724611	0.53167	rs34545274	rs11581248	0.349	-50.21	0.453	-0.36116	0.718
TPT1	13	45907606	45915419	0.01242	rs73177570	rs116996191	0.00546	6.45	-0.36	-0.36	0.71885
SIGLEC7	19	51645556	51656783	0.25818	rs16982733	rs12983058	0.049431	18.92	1.504	0.3598	0.71898
CCDC134	22	42196683	42228168	0.07995	rs116962367	rs11090057	0.058641	20.86	0.229	-0.356	0.7218
RNPEP	1	201951500	201975275	0.38573	rs35448410	rs6689634	0.122	29.8	-1.864	-0.35523	0.722
CXCL1	4	74735110	74737025	0.1322	rs76913885	rs1366946	0.132887	31	-0.982	0.35447	0.723
APLP2	11	129938042	130014706	0.01974	rs7946313	rs61349706	0.014538	11.13	0.129	0.35431	0.7231
ACP5	19	11685475	11689823	0.10227	rs149642807	rs2305799	0.042065	-17.6	1.73	-0.3518	0.72495
TRIP10	19	6737936	6751541	0.06296	rs118024974	rs8106212	0.008587	7.98	-0.563	-0.3501	0.72628
NAGPA	16	5074845	5084142	0.2774	rs73510408	rs12599777	0.10104	-27.07	0.476	-0.3478	0.728
ENO2	12	7022909	7032861	0.02024	rs12816349	rs1639122	0.014454	3.11	0.201	-0.3472	0.7284
MTHFD1	14	64854749	64930175	0.03986	rs10151658	rs10146204	0.016785	-11.12	-0.664	0.34586	0.7294
BPI	20	36932552	36965907	0.26323	rs201776059	rs6127742	0.093459	-27.19	1.23	-0.34475	0.73028
GSTP1	11	67351213	67354127	0.24537	rs111579825	rs1695	0.153121	-33.25	-0.19	-0.34405	0.7308
ICOSLG	21	45636897	45660849	0.0605	rs73226967	rs2838537	0.00958	-9.14	-1.179	-0.3442	0.731
FGG	4	155525286	155534119	0.0257	rs72721326	rs1800790	0.015204	10.72	0.678	0.34057	0.733
CD36	7	79998891	80308593	0.0147	rs1711116	rs11760281	0.000675	-4.99	-0.393	-0.3378	0.735528
CP	3	148880197	148939616	0.02258	rs13084366	rs13089226	0.00598	6.68	-0.88	0.33736	0.7358
C10orf54	10	73507313	73533277	0.12251	rs2166631	rs12415873	0.090054	25.59	-0.911	-0.336	0.7369
TLR3	4	186990309	187009227	0.36105	rs76953615	rs3775291	0.255351	-42.95	0.03057	-0.33563	0.737
DTD1	20	18568586	18747288	0.09813	rs74694451	rs6081231	0.272812	-44.38	-0.18	0.33569	0.7371
CD46	1	207925399	207968858	0.10368	rs533565637	rs2488252	0.172	-35.29	-1.258	0.3341	0.738
SFTPD	10	81697223	81742370	0.15866	rs143221940	rs7084667	0.124325	30.06	0.315	0.3337	0.7386
NQO2	6	2988221	3019989	0.43602	rs408770	rs9378755	0.18041	-35.35	0.682	0.3333	0.738905
AGT	1	230826522	230881322	0.06843	rs72750750	rs2071404	0.0327	17	-0.429	-0.33281	0.739
INHBB	2	121103712	121109379	0.13809	rs12992152	rs17050272	0.08664	25.11	0.536	0.332	0.7399
MAN1C1	1	25943282	26112697	0.0733	rs813203	rs11247595	0.0433	-17.72	-0.129	0.33245	0.74
AKR1C4	10	5237425	5260912	0.11617	rs9423584	rs75811842	0.289145	-45.68	0.327	-0.3313	0.7404
GSS	20	33516235	33543830	0.12226	rs61736332	rs6088642	0.091434	25.78	-0.302	-0.3279	0.74299
CHST12	7	2443223	2488119	0.06356	rs3996330	rs884566	0.041019	17.38	0.591	0.3267	0.743919
NUDT5	10	12207329	12238143	0.00659	rs11257576	rs7099650	0.00191	-5.99	-0.42	-0.3257	0.7447
FABP1	2	88422501	88427581	0.04625	rs79992736	rs2241883	0.0356	-16.14	0.324	-0.324	0.74594
ARHGEF25	12	58003963	58011028	0.04585	rs113973631	rs10437954	0.016808	-11.19	1.11	-0.3229	0.7467
RMDN1	8	87480486	87526586	0.21384	rs5027373	rs7818213	0.449132	-56.94	-0.122	0.3204	0.749
LILRB1	19	55128612	55149473	0.1176	rs139958085	rs2098953	0.225319	-40.34	0.075	-0.3192	0.74956
AGER	6	32148745	32152099	0.1132	rs2856437	rs2070600	0.04918	-18.86	-0.318	0.318	0.750485
PEBP1	12	118573929	118583389	0.14872	rs144640984	rs1050625	0.086526	-25	0.14181	-0.316	0.752
PLCG1	20	39765600	39825441	0.01564	rs35570186	rs753381	0.01116	9.23	0.313	0.313	0.75428
F2	11	46740746	46761056	0.01965	rs17725808	rs1799963	0.008626	8.03	0.308	0.308	0.7581
MICB	6	31462658	31478901	0.43328	rs2248372	rs3094011	0.16346	-34.42	1.433	0.3056	0.759875
SVEP1	9	113127528	113342160	0.21226	rs117900161	rs78742138	0.04967	19	1.395	0.3041	0.761
NTN4	12	96051583	96184967	0.05893	rs75420903	rs17288108	0.040368	-17.11	0.431	-0.303	0.7619
CFHR2	1	196912868	196928752	0.66887	rs41310132	rs4085749	0.273	-44.41	-0.862	-0.30299	0.762
VTI1B	14	68113802	68141537	0.01705	rs118148639	rs10483801	0.008382	7.9	0.994	0.30243	0.7623
CBL	11	119077008	119184636	0.08607	rs61751532	rs76683040	0.062861	-21.75	-0.912	0.29941	0.7646
AK2	1	33473541	33546597	0.02471	rs183252230	rs188456604	0.000811	-4.94	0.2307	0.29894	0.765
NCK2	2	106361369	106510730	0.04001	rs7349427	rs933793	0.008	-10.19	0.307	0.2981	0.76566
VIT	2	36923833	37041935	0.30328	rs78948154	rs1468810	0.12902	-30.58	-0.285	0.2974	0.76617
BPGM	7	134331563	134364568	0.00591	rs12669278	rs4732044	0.005718	6.66	-0.297	-0.297	0.766467
MBL2	10	54525140	54532544	0.5289	rs77645235	rs7899547	0.273513	44.43	0.332	-0.2959	0.7673
CRISP2	6	49660071	49681303	0.22014	rs55743881	rs555247	0.12361	29.92	-0.339	-0.2958	0.767362
HAPLN1	5	82933624	83016674	0.03075	rs4703967	rs6886442	0.00633	8.96	-0.959	-0.2947	0.76822
LINGO1	15	77905369	78113242	0.02161	rs566097906	rs62007781	0.00552	7.99	0.708	0.2924	0.77
EFNB2	13	107142093	107188010	0.04744	rs181455852	rs59166663	0.018	11.75	-0.106	0.292	0.77025
PRKCB	16	23847304	24231932	0.04362	rs111445342	rs2023671	0.03403	-15.7	-0.548	0.2901	0.772
ENO3	17	4851387	4860426	0.03575	rs8067142	rs238238	0.0521	-19.77	-0.356	0.28968	0.7721
AKR7A3	1	19609067	19615264	0.26029	rs77065167	rs2231198	0.107	-24.06	-1.753	0.28843	0.773
PACAP	5	138723156	138725770	0.00452	rs6869463	rs116498185	0.00313	5.69	0.21	0.28831	0.77311
CNDP1	18	72201735	72254448	0.11812	rs117116303	rs17817077	0.02834	14.38	0.084	0.287	0.7739
ACY1	3	52017356	52023213	0.03411	rs352172	rs148804382	0.0106	-9.14	-0.286	0.28586	0.775
SEMA5A	5	9035145	9546187	0.2794	rs187697854	rs56015217	0.145	32.48	-0.366	-0.28573	0.77508
UCMA	10	13263766	13276374	0.16173	rs148371284	rs1537771	0.047975	-18.67	-1.058	0.2834	0.7768
ENPEP	4	111286889	111486441	0.32466	rs11937052	rs33966350	0.088416	-25.32	0.17	0.28151	0.778
GRAMD1C	3	113547029	113666021	0.19339	rs73238029	rs61634901	0.145	32.48	0.201	0.28153	0.7783
GP1BA	17	4835572	4838318	0.02626	rs79391571	rs1060431	0.0191	11.92	-0.374	-0.28036	0.7792
QPCTL	19	46195661	46207247	0.14485	rs6509231	rs17850756	0.098341	-26.66	0.382	-0.2803	0.77923
APOC1	19	45417504	45422606	0.06832	rs552359704	rs8106813	0.02889	15.45	0.0828	-0.2795	0.77983
MXRA8	1	1288069	1297157	0.00991	rs1240743	rs1240713	0.00487	-7.46	-0.952	0.27933	0.78
ANXA5	4	122589101	122618150	0.00637	rs74854372	rs36177180	0.00096	-4.77	-0.844	-0.27885	0.78
CCL7	17	32597240	32599261	0.17405	rs2530797	rs3138037	0.119	-29.31	0.339	0.27928	0.78
PAK4	19	39616410	39673456	0.01676	rs56147550	rs11667387	0.002555	-6.49	-0.245	0.2786	0.78056
ENPP6	4	185009859	185142383	0.00734	rs1347429	rs28673999	0.002671	5.43	0.00982	0.27835	0.781
KLK7	19	51479724	51487355	0.09106	rs55744949	rs1654523	0.05244	19.66	-0.788	-0.2769	0.78183
DECR1	8	91013633	91065861	0.02246	rs117770316	rs1805806	0.015824	-11.25	0.04	-0.2762	0.782
UGDH	4	39500375	39529931	0.10227	rs13135475	rs1138891	0.095598	26.39	-0.102	0.27542	0.783
HINT1	5	130491076	130560161	0.01974	rs74590752	rs12332117	0.0363	16.31	-0.441	-0.27496	0.78335
GHR	5	42423541	42721980	0.1449	rs4146624	rs4866942	0.0556	-20.26	0.614	-0.27304	0.78482
SIGLEC12	19	51994481	52005054	0.21827	rs17695798	rs3826667	0.311978	-47.46	0.2516	-0.2723	0.78542
CRYZ	1	75171166	75199092	0.18276	rs4650280	rs3819946	0.276	44.63	-0.591	-0.27142	0.786
NTM	11	131240373	132206716	0.1924	rs61909207	rs2511781	0.160317	34.04	-0.392	-0.27062	0.7867
PTPRJ	11	48002110	48192393	0.02046	rs11039509	rs1566734	0.013797	10.28	-0.268	-0.268	0.7887
BCAN	1	156611182	156629324	0.14819	rs116132935	rs2365715	0.0459	-18.31	-0.2214	0.26802	0.789
MSR1	8	15965387	16424999	0.1926	rs150158578	rs41341748	0.046749	-18.61	0.595	0.2682	0.789
MDGA1	6	37598455	37667082	0.57444	rs115615046	rs9349050	0.50047	-60.11	-0.142	0.2671	0.789389
CTSO	4	156842732	156875064	0.02782	rs6830845	rs2334114	0.009841	-10.47	-0.606	0.26576	0.79
APOBEC3G	22	39473072	39483748	0.04197	rs77711238	rs17537581	0.017729	-12.03	0.323	0.2636	0.7921
LDLRAP1	1	25870097	25895377	0.12575	rs631133	rs4523506	0.0609	-21.29	0.158	0.26245	0.793
EBI3	19	4229520	4237525	0.21208	rs58237134	rs4905	0.44013	-56.36	-0.171	0.2619	0.79342
CDNF	10	14861244	14880574	0.14044	rs72772430	rs188293941	0.017523	-12.66	0.302	0.2616	0.7936
ANGPT2	8	6357153	6420930	0.04789	rs11786655	rs1968586	0.021563	-12.56	0.071	0.2608	0.794
F13B	1	197007871	197036390	0.12153	rs142565493	rs1332668	0.123	-30.07	0.034	0.26031	0.795
SPINK2	4	57676026	57687908	0.0729	rs111632193	rs7694521	0.016979	13.06	-0.11	0.25965	0.795
ZFAND1	8	82613569	82645138	0.15425	rs59872751	rs2912805	0.133522	31.12	0.302	-0.2599	0.795
LYN	8	56792394	56926728	0.0124	rs7815842	rs1050855	0.005572	-8.21	-0.929	0.2595	0.795
C2	6	31865562	31913449	0.22122	rs2050190	rs115204832	0.03112	-16.56	-1.2917	0.2573	0.796916
MATN2	8	98881068	99048952	0.14341	rs1809173	rs17831160	0.018852	12.54	-0.27	-0.2573	0.797
VASN	16	4421849	4433539	0.02132	rs77423447	rs757593	0.00655	7.12	0.308	-0.2553	0.798
STARD5	15	81601394	81616524	0.10016	rs117378154	rs28555408	0.03409	-15.77	0.071	0.2556	0.7983
CLEC12A	12	10103915	10148293	0.3778	rs17514056	rs1060648	0.529498	-61.83	-0.332	0.2534	0.8
IL12B	5	158741788	158757495	0.16095	rs62385405	rs4244437	0.147	32.65	-0.547	-0.25188	0.80113
ANGPTL4	19	8428173	8439254	0.00643	rs62117488	rs116843064	0.014613	-10.33	0.758	-0.2517	0.8013
MMP12	11	102733467	102745712	0.13413	rs143084488	rs2276109	0.124634	-30.27	0.247	-0.25127	0.8016
RNASE3	14	21359544	21360507	0.19237	rs17277368	rs147307766	0.077446	24.79	0.95	-0.25072	0.802
TNFRSF17	16	12059067	12061925	0.02402	rs12927567	rs387871	0.01394	-10.14	-0.075	-0.2513	0.802
SORD	15	45315345	45369383	0.18178	rs12594905	rs56060952	0.04549	18.25	-0.898	0.2502	0.8024
FRZB	2	183698002	183731365	0.42053	rs13035906	rs288326	0.08248	24.48	0.005	-0.247	0.80492
CAPN2	1	223889295	223963720	0.13521	rs10916247	rs188530181	0.0439	-17.83	0.4972	-0.24701	0.805
NTM	11	131240373	132206716	0.22768	rs61909207	rs2511781	0.187727	36.83	-0.392	-0.2461	0.8056
KRT1	12	53068520	53074191	0.01448	rs59374937	rs117254202	0.005531	6.62	-0.245	-0.245	0.8065
ADCK4	19	41197419	41231689	0.0043	rs11879790	rs78667589	0.000213	-4.05	-0.146	-0.2446	0.80679
CD209	19	7804879	7812450	0.11629	rs55742260	rs2335525	0.058734	-20.9	0.887	0.2432	0.80789
SPOCK3	4	167654535	168155947	0.21002	rs78489518	rs35065151	0.224187	40.26	0.247	0.24278	0.808
ACTN1	14	69340845	69446157	0.02481	rs74685601	rs80123288	0.004356	-8.03	0.021	0.24247	0.8084
SAA1	11	18287807	18291524	0.21937	rs149803180	rs11024589	0.12056	-29.54	-0.218	-0.24009	0.8103
FKBP4	12	2904136	2914589	0.13	rs147478858	rs56196860	0.063577	-21.48	0.27	-0.2391	0.811
HS3ST3A1	17	13397349	13505246	0.01016	rs35688427	rs139707331	0.00301	5.91	0.613	-0.23511	0.8141
NRP1	10	33466420	33625190	0.0841	rs11009330	rs734186	0.072527	-22.9	0.323	-0.233	0.8158
DNER	2	230222345	230579271	0.06539	rs74906344	rs34661502	0.02462	-13.87	-0.509	0.2326	0.81609
ANXA2	15	60639333	60695082	0.10752	rs168144	rs12907068	0.06653	22.92	-0.678	-0.2321	0.8165
CHRDL2	11	74407474	74442471	0.09653	rs147909919	rs61389091	0.044891	-18.03	0.149	-0.22977	0.8183
CLINT1	5	157212751	157286153	0.02295	rs11748404	rs12284	0.0139	-10.26	-0.527	0.22703	0.8204
DDOST	1	20978260	20988037	0.03205	rs141203102	rs150466875	0.0195	-12.12	0.049	-0.22599	0.821
KIAA1549L	11	33397654	33695648	0.19393	rs117512023	rs2753408	0.147915	-32.68	0.26	-0.22218	0.8242
APCS	1	159557616	159558655	0.06347	rs4083420	rs77672383	0.0375	-16.88	-0.062	0.21629	0.829
WFDC1	16	84328452	84363450	0.28646	rs116915301	rs400345	0.21547	-39.44	-1.219	0.2146	0.83
SPON1	11	13984270	14289679	0.13759	rs150566877	rs10832164	0.123763	-29.94	-0.125	0.21405	0.8305
LILRA5	19	54818353	54824436	0.06746	rs1761450	rs397600	0.025155	13.63	-0.929	-0.2118	0.8323
MTIF3	13	28009780	28024728	0.01487	rs9512819	rs1218802	0.00628	-6.95	-0.211	0.211	0.83289
IL2RA	10	6052652	6104333	0.01792	rs7078273	rs12722497	0.008421	8	0.211	0.211	0.8329
HS3ST3B1	17	14204398	14252721	0.02113	rs72815715	rs62056073	0.00678	-8.17	1.158	-0.20859	0.8348
CRISPLD2	16	84853591	84954374	0.02526	rs11643247	rs535285054	0.00366	-7.62	-0.189	-0.2086	0.835
ELANE	19	851014	856247	0.05685	rs144944207	rs56283881	0.019409	-12.58	0.141	-0.2082	0.83507
GNRH2	20	3024268	3026393	0.00882	rs2295552	rs6138990	0.006124	-6.98	0.208	-0.208	0.83523
BLVRA	7	43798279	43846941	0.1181	rs139202271	rs1050916	0.020426	-14.32	-0.226	0.2069	0.836072
KNG1	3	186435137	186462199	0.07782	rs41268615	rs5030062	0.0462	18.4	-0.391	-0.20578	0.837
ARHGAP25	2	68906733	69053965	0.12147	rs149877236	rs13413887	0.03282	15.59	-0.538	-0.204	0.83838
SPINK1	5	147204135	147211234	0.02574	rs2303071	rs6580502	0.0123	-9.69	0.232	0.20346	0.83878
PARK7	1	8014351	8045565	0.11256	rs2859389	rs17523802	0.179	36.04	-0.545	0.20306	0.839
IFNLR1	1	24480658	24514449	0.06664	rs142601947	rs12046369	0.0167	-11.17	0.22	0.20254	0.839
DAPP1	4	100737984	100791347	0.09032	rs141273868	rs3822103	0.058752	-20.68	0.296	0.20336	0.839
C5	9	123714613	123812553	0.04546	rs57332564	rs17220750	0.01522	10.69	-0.471	-0.20143	0.8404
NID1	1	236139130	236228409	0.06636	rs75756760	rs2734807	0.0245	13.42	-0.0721	-0.20005	0.841
BMPER	7	33943920	34196039	0.0966	rs10252136	rs16879245	0.016771	-12.73	-0.187	0.1982	0.842889
KLK15	19	51328545	51340469	0.02132	rs111386194	rs73048483	0.01775	11.5	-0.396	-0.1973	0.84357
SIRPB1	20	1542031	1600707	0.4662	rs6105929	rs12480515	0.269027	44.06	-0.764	-0.19724	0.84364
ATP1B2	17	7549945	7561088	0.11194	rs9894946	rs1642762	0.0896	-25.64	-0.346	0.1972	0.8437
CASP3	4	185548850	185570663	0.08534	rs78413518	rs72689255	0.11319	-28.79	-0.078	-0.19705	0.844
SERPINB8	18	61637263	61687013	0.39607	rs17072566	rs3826616	0.089472	-25.49	0.139	-0.197	0.8441
PF4	4	74846528	74847744	0.02601	rs115183538	rs199877023	0.016767	-11.32	0.59805	-0.19424	0.846
SERPINE1	7	100770385	100782528	0.02664	rs117400336	rs2227631	0.016395	-10.97	-0.924	0.1937	0.846407
TNFAIP8	5	118604387	118735383	0.07231	rs9327104	rs1035376	0.0505	19.14	-0.019	-0.1932	0.8468
GLUL	1	182347233	182361341	0.00748	rs7523513	rs61805076	0.00499	6.47	-0.193	-0.193	0.847
KLK14	19	51580752	51587502	0.16196	rs76206169	rs11666870	0.029998	14.88	1.217	0.1918	0.8479
ADAMTS5	21	28290241	28339407	0.27228	rs229029	rs2830585	0.22635	-40.42	0.539	-0.1923	0.848
TNFAIP6	2	152214106	152236560	0.14032	rs4664230	rs2278089	0.10268	-27.24	0.231	-0.1909	0.84858
BLVRB	19	40953672	40971671	0.08382	rs150966209	rs184723794	0.026996	-14.13	-0.2021	0.1891	0.85
REG1A	2	79347488	79350535	0.15112	rs72814609	rs11126696	0.04029	17.1	-0.204	0.189	0.85007
ARSK	5	94890805	94940806	0.01586	rs12522074	rs956274	0.00819	-7.78	0.881	-0.18795	0.85091
MCL1	1	150533371	150552214	0.09241	rs267733	rs190596489	0.0421	-17.73	0.198	0.18705	0.852
MAPK9	5	179660143	179719099	0.04492	rs13185599	rs11741142	0.0372	16.47	-0.187	0.18567	0.85271
PLEKHA1	10	124134212	124202118	0.02026	rs117213543	rs10788274	0.025208	-13.69	-0.458	0.1852	0.8531
NDST1	5	149865381	149937773	0.05693	rs11743220	rs11746198	0.0239	13.43	-0.504	-0.1828	0.85495
AGRP	16	67516474	67517450	0.05001	rs7200919	rs114322795	0.03163	15.41	0.4	0.1833	0.855
SERPINB1	6	2832566	2842193	0.0611	rs74366840	rs316343	0.0432	18.1	-0.432	-0.18	0.857
TBCB	19	36605191	36616849	0.096	rs62111376	rs2231569	0.053681	19.73	-0.986	-0.1787	0.85817
DLL4	15	41221538	41231271	0.00881	rs117171659	rs117454282	0.00515	6.47	0.361	0.1785	0.8583
LRIG1	3	66429221	66551687	0.20682	rs75988918	rs2306272	0.228	-40.57	0.218	-0.17838	0.8584
IL1RN	2	113864791	113891593	0.07229	rs140622233	rs55709272	0.06882	-22.37	-0.895	-0.1779	0.85878
PMM2	16	8882680	8956391	0.04325	rs148546832	rs34258285	0.023	-13.17	-0.6	0.1759	0.86
GPC5	13	92050875	93525935	0.14702	rs511979	rs342706	0.1875	-36.81	0.275	0.1755	0.86068
AFM	4	74347462	74369718	0.06431	rs10003721	rs72856662	0.05276	-19.79	-0.185	-0.17348	0.862
C1QL1	17	43037061	43045671	0.07454	rs8327	rs7225162	0.0544	-19.9	1.083	-0.17271	0.8629
LRRC32	11	76368568	76381791	0.01272	rs117002644	rs12275758	0.00241	-5.48	2.028	-0.17232	0.8632
PCOLCE2	3	142534764	142608048	0.32173	rs111471174	rs11716897	0.109	28.12	1.593	-0.17052	0.8646
EPHA2	1	16450832	16482564	0.14755	rs532881410	rs6690317	0.0644	-22.11	-1.137	0.17043	0.865
TIMP3	22	33197691	33259028	0.14622	rs79431499	rs5749506	0.176709	-35.82	-0.414	-0.1695	0.8654
CA3	8	86285665	86361269	0.04038	rs118113108	rs1543852	0.03604	16.76	0.649	0.1683	0.866
GDI2	10	5807186	5884095	0.07521	rs143467273	rs55913768	0.097712	-26.73	-0.061	-0.1655	0.8685
KNG1	3	186435137	186462199	0.23141	rs266732	rs76438938	0.12	-29.71	-1.066	-0.16475	0.8691
SCUBE1	22	43593286	43739378	0.05513	rs138715386	rs13053545	0.013685	10.9	2.162	0.1646	0.8692
NCAM1	11	112831969	113149158	0.19808	rs10891526	rs2288158	0.048359	18.72	0.482	0.16428	0.8695
GLRX2	1	193059996	193075244	0.11091	rs111563089	rs143131184	0.0361	16.2	-0.462	-0.16376	0.87
MAPKAPK2	1	206858250	206907626	0.05599	rs79112133	rs4256810	0.0466	18.42	0.163	0.163	0.871
FUT10	8	33228342	33330664	0.23747	rs149825151	rs2732317	0.297514	-46.34	-0.203	-0.1609	0.872
MIF	22	24236570	24237414	0.03659	rs113138070	rs5751764	0.034175	-15.92	-0.251	-0.1597	0.8731
COMP	19	18893583	18902114	0.06506	rs17683766	rs12974746	0.024051	-13.25	1.207	0.1594	0.87332
WFDC2	20	44098393	44110172	0.01647	rs11697000	rs6032226	0.003094	-6.07	-0.305	0.15827	0.87425
TNR	1	175284330	175712752	0.03254	rs2685	rs2235256	0.0231	-13.02	-0.1577	0.15773	0.875
ST3GAL6	3	98451080	98540045	0.28141	rs62278535	rs28489284	0.232	-41.06	-0.128	0.15648	0.8757
COCH	14	31343720	31364271	0.29442	rs1950664	rs28400019	0.107776	27.91	-0.524	-0.15602	0.876
GC	4	72607413	72669758	0.03051	rs2139646	rs7697091	0.008557	-9.31	1.29	0.15353	0.878
LILRA2	19	55084387	55101752	0.12131	rs1761450	rs2151868	0.064809	-21.71	-0.1376	-0.1531	0.87832
GAA	17	78075355	78093680	0.11264	rs2229221	rs2304850	0.053	-19.65	1.321	-0.15257	0.8787
CREB3L4	1	153940010	153946837	0.02709	rs114678888	rs4845586	0.0409	17.3	-0.054	-0.15234	0.879
SFRP1	8	41119481	41166992	0.08218	rs62642270	rs72643820	0.020698	-12.33	0.396	-0.152	0.879
NADK	1	1682671	1711896	0.0276	rs12026498	rs4648629	0.0458	-18.51	0.235	0.14912	0.881
CD300A	17	72462538	72480933	0.23383	rs112286523	rs2272111	0.245	-42.06	-0.115	0.14968	0.881
FGF2	4	123747863	123819391	0.0318	rs308403	rs308403	0.021284	-12.52	-0.147	0.147	0.883
HRSP12	8	99114572	99129399	0.07899	rs66527355	rs10955148	0.071971	-22.86	-0.119	0.1473	0.883
CFD	19	859664	863641	0.10173	rs144944207	rs72984031	0.014672	-10.38	0.21	-0.1443	0.88527
DMKN	19	35988122	36004560	0.01341	rs7408798	rs7408798	0.003318	-7.78	-1.955	-0.1436	0.88578
APOE	19	45409048	45412650	0.00984	rs117789739	rs5117	0.002029	5.85	-0.828	-0.141	0.88784
ARL3	10	104433488	104474154	0.16645	rs117305908	rs8354	0.088622	-25.42	-1.223	0.14	0.8886
MST1	3	49721380	49726934	0.43104	rs115654252	rs3197999	0.444	-56.68	-0.336	-0.13988	0.8888
SEMA6B	19	4542605	4581788	0.02603	rs116905541	rs4353572	0.009394	8.38	-0.6787	-0.1392	0.88932
AOC1	7	150521715	150558592	0.4716	rs77332378	rs10452848	0.288496	45.64	0.057	-0.139	0.889477
TNFRSF1B	1	12227048	12269285	0.10458	rs5746065	rs519064	0.0816	-24.77	1.403	-0.13775	0.89
SPON2	4	1160720	1202750	0.12827	rs141793018	rs11247975	0.153872	-33.39	-0.139	-0.13833	0.89
DOK2	8	21766384	21771201	0.01841	rs11781593	rs2054713	0.002794	6.63	0.827	0.1372	0.891
DOK2	8	21766384	21771201	0.1036	rs117761782	rs17615788	0.016655	12.07	0.762	0.1371	0.891
DEFB1	8	6728114	6735458	0.09985	rs7011579	rs2741117	0.085581	-25.01	0.234	-0.1339	0.893
SPSB1	1	9352953	9429591	0.00872	rs6680525	rs4908782	-1.59e-05	-3.91	-0.5	0.13296	0.894
DPT	1	168664706	168698444	0.16255	rs186575271	rs1018454	0.0913	25.7	1.24	-0.13137	0.895
FAS	10	90750288	90776816	0.15453	rs112187737	rs7911226	0.069757	-22.48	0.088	0.1306	0.8961
GPX7	1	53068043	53074723	0.13396	rs12089784	rs6669154	0.143	-32.23	0.68	-0.12889	0.897
GSTO1	10	105995114	106027217	0.27098	rs78797844	rs641071	0.404319	-54.02	0.041	-0.1289	0.8974
CD274	9	5450503	5470566	0.07503	rs4742095	rs822342	0.04959	19.08	0.554	-0.12822	0.898
C10orf54	10	73507313	73533277	0.12444	rs9416009	rs10762476	0.082794	24.49	-0.873	0.1276	0.8985
SERPINF2	17	1646130	1658559	0.10113	rs117522064	rs11078596	0.0307	-16.14	0.586	-0.12684	0.8991
PVRL2	19	45349432	45392480	0.02087	rs7245887	rs440277	0.00768	-7.93	-0.057	0.1263	0.89947
GCA	2	163175350	163228105	0.19376	rs115719986	rs17783344	0.07967	-24.11	0.126	-0.126	0.89973
TMED2	12	124069080	124083129	0.0032	rs112118241	rs9919	0.000911	-4.78	0.125	-0.125	0.9005
GMFG	19	39818993	39833012	0.03906	rs143088127	rs30459	0.022029	-13.11	-0.3871	-0.1239	0.90143
TCN2	22	31002990	31023258	0.34096	rs62227011	rs12169610	0.138152	-32.35	0.288	-0.1231	0.902
C4BPA	1	207277578	207318317	0.17266	rs61815568	rs11120218	0.133	31.67	0.168	-0.12201	0.903
GRAMD1C	3	113547029	113666021	0.08358	rs116709996	rs61634901	0.0494	19.01	0.201	0.12189	0.903
CES1	16	55836763	55867249	0.05679	rs7403998	rs76336259	0.01814	-11.64	-0.53	0.1218	0.903
IL5RA	3	3108008	3168297	0.33274	rs7612215	rs77400868	0.06	20.84	0.163	0.12088	0.9038
CADM1	11	115039938	115375675	0.0386	rs117607900	rs17564430	0.031743	15.35	-0.375	0.1198	0.9046
IL6ST	5	55230923	55290850	0.10113	rs4865632	rs13183065	0.0891	25.42	0.32	0.11881	0.90543
SERPIND1	22	21128401	21142008	0.0097	rs35023259	rs73160986	0.00408	5.72	-0.115	-0.115	0.9084
IGDCC4	15	65673822	65715285	0.24044	rs111896910	rs8036706	0.02824	15.37	0.859	0.1143	0.909
ANPEP	15	90328126	90358633	0.00994	rs79483623	rs1042499	0.00495	6.2	0.114	0.114	0.9092
MICA	6	31367561	31383092	0.41169	rs2855811	rs2523496	0.33362	-49.08	-0.0181	0.1138	0.909403
CD300C	17	72537212	72542254	0.08432	rs3744199	rs62087200	0.0546	-19.91	0.164	0.11355	0.9096
SPARC	5	151040657	151066536	0.03817	rs77938019	rs59311424	0.00856	-8.05	2.087	-0.11268	0.91028
SEMA4D	9	91975702	92113045	0.24102	rs12550958	rs45464494	0.28016	-45	-0.27	0.11272	0.9103
CHST9	18	24486445	24765272	0.04417	rs548762672	rs11660451	0.03907	17	0.246	0.107	0.9146
CNTNAP2	7	145813094	148118090	0.1456	rs181173056	rs6951436	0.228564	-40.76	0.018	0.1071	0.914673
CYB5R2	11	7686331	7698453	0.14049	rs4548609	rs11041504	0.129922	30.75	0.671	-0.10575	0.9158
HBZ	16	192727	204502	0.28302	rs527914876	rs2461286	0.2181	-39.69	0.055	-0.1059	0.916
SHANK3	22	51112843	51171726	0.09251	rs73174417	rs6009946	0.062853	21.34	0.538	0.1053	0.9161
TXNDC5	6	7881750	7911021	0.08261	rs17398289	rs111331197	0.03401	15.78	-0.624	-0.1047	0.916608
NTRK3	15	88402982	88799999	0.08887	rs118106010	rs28714295	0.04508	18.08	-0.967	-0.1045	0.9168
PDGFRB	5	149493402	149535435	0.51855	rs11742769	rs3816018	0.535	62.13	0.011	-0.10441	0.91684
MET	7	116312250	116438431	0.06393	rs73210117	rs41748	0.01832	-11.65	-0.524	0.1041	0.917082
REG3G	2	79252812	79255631	0.12057	rs80018640	rs430298	0.11659	29.07	1.433	0.1032	0.91783
GREM1	15	33010205	33037307	0.22825	rs75133971	rs2293582	0.24448	42.06	-0.146	-0.1025	0.9184
ECM1	1	150480538	150486265	0.26156	rs56972081	rs3737240	0.348	-50.13	-0.146	-0.10132	0.919
IMPAD1	8	57870490	57906426	0.19565	rs78252449	rs112433249	0.105474	-27.67	-0.187	-0.1014	0.919
COL11A2	6	33130458	33160276	0.21099	rs3128970	rs3129205	0.0647	21.99	-0.778	-0.0971	0.92261
LAG3	12	6881678	6887621	0.03133	rs146094919	rs3782735	0.012072	10.06	0.41367	0.097	0.9227
SMOC2	6	168841831	169073984	0.1638	rs2147458	rs56296467	0.08756	-25.22	-0.896	0.097	0.922735
SERPINA5	14	95027779	95059455	0.026	rs1012808	rs10133793	0.010214	8.82	-0.239	-0.09692	0.9228
COL6A3	2	238232646	238322971	0.06075	rs191272518	rs1050785	0.02303	12.99	-1.008	-0.0964	0.92319
UGT1A1	2	234668916	234681946	0.08571	rs213541	rs887829	0.16126	-34.14	-0.054	-0.0962	0.92336
NCAN	19	19322767	19363042	0.03004	rs113429338	rs2228603	0.030074	-14.79	0.095	-0.095	0.92431
FOLR3	11	71825915	71850936	0.28828	rs341087	rs146694036	0.177043	35.75	0.459	-0.09462	0.9246
ST3GAL1	8	134467091	134584183	0.10361	rs72731583	rs9643300	0.060857	-21.08	0.517	0.0938	0.925
PENK	8	57349233	57359230	0.10137	rs13282129	rs2576581	0.14522	-32.4	0.618	-0.094	0.925
MMP7	11	102391239	102401481	0.20084	rs17860565	rs11568819	0.074558	23.22	-1.07	0.09246	0.9263
PGP	16	2261594	2264841	0.09732	rs62040028	rs116977380	0.05448	19.9	-0.274	0.0913	0.927
LARGE	22	33558212	34318829	0.00527	rs9609844	rs79336623	0.000198	-3.98	0.09	-0.09	0.9283
LILRA5	19	54818353	54824436	0.09089	rs1761450	rs397600	0.033508	15.69	-0.929	-0.0895	0.92868
REG1B	2	79312149	79315145	0.13798	rs140618184	rs11126696	0.04901	18.85	-0.204	0.0894	0.92879
ENTPD1	10	97471536	97637023	0.03226	rs45527542	rs11598475	0.037809	16.64	-0.559	-0.0884	0.9296
CNRIP1	2	68511303	68547183	0.166	rs3732043	rs7604489	0.16899	-35.26	-0.002	-0.0865	0.93111
MLN	6	33762450	33771780	0.0743	rs77879076	rs9394169	0.06443	-23.05	0.804	0.0863	0.931203
ADAMTS13	9	136279478	136324524	0.12662	rs7864157	rs35516997	0.13264	-31.06	-0.01	-0.08601	0.9315
PLA2R1	2	160788517	160919126	0.38893	rs77492983	rs3749117	0.27831	-44.82	0.721	0.0857	0.93173
SARS2	19	39405906	39421403	0.00766	rs12977011	rs1808661	0.005265	-6.63	0.085	-0.085	0.93226
APOH	17	64208151	64252643	0.37179	rs74971034	rs1801689	0.148	-32.7	0.028	-0.08177	0.9348
ANGPTL3	1	63063191	63071984	0.02604	rs10889307	rs10889333	0.0497	-19.2	-0.139	-0.08139	0.935
CA13	8	86132816	86196302	0.14248	rs77462239	rs113014331	0.176119	-35.67	0.113	0.0822	0.935
IGFLR1	19	36229702	36233354	0.21721	rs73036180	rs12459634	0.25179	-42.63	0.058	0.0802	0.93611
CPN2	3	194060497	194072057	0.31589	rs7645715	rs11711157	0.229	-40.65	0.196	0.07856	0.9374
ACYP2	2	54197975	54532437	0.07498	rs6720668	rs11125524	0.07379	23.12	-0.577	-0.0783	0.93761
IL2RB	22	37521883	37571094	0.01255	rs4821558	rs228953	0.011478	9.26	0.077	0.077	0.9386
FCRL4	1	157543537	157567875	0.40663	rs149499628	rs11582663	0.264	-43.69	0.389	-0.07694	0.939
LRPAP1	4	3505339	3534173	0.09284	rs16844569	rs16844464	0.057597	-20.44	-0.10467	0.07626	0.939
LRRC15	3	194075978	194090472	0.1651	rs73206330	rs923930	0.138	31.69	0.528	-0.07614	0.9393
ACVRL1	12	52300692	52317145	0.06622	rs112567112	rs78197611	0.039205	17.06	0.61	0.0747	0.9405
SCARF2	22	20778874	20792113	0.07979	rs188270701	rs5763025	0.040551	17.25	0.309	-0.0742	0.9408
SCG3	15	51973689	52013223	0.20943	rs190964336	rs2607116	0.23798	41.46	0.556	0.0741	0.9409
GBP1	1	89517565	89531043	0.0342	rs74890890	rs61798920	0.0115	-9.66	1.707	0.07344	0.941
MX1	21	42791947	42841998	0.08458	rs138989737	rs464783	0.08091	-24.27	-0.521	0.074	0.941
NCAM2	21	22370727	22915650	0.31831	rs2826561	rs2826851	0.12302	29.83	1.029	-0.0713	0.943
CCL14	17	34310324	34314040	0.24117	rs148065954	rs7222922	0.22	-39.86	-0.333	-0.07126	0.9432
ENGASE	17	77070906	77084681	0.31104	rs111622267	rs56107536	0.107	27.81	0.018	-0.07087	0.9435
SERPINA10	14	94746797	94759605	0.13759	rs72696696	rs12434093	0.206856	38.64	-0.318	-0.06969	0.9444
PGLYRP1	19	46522411	46526311	0.02131	rs1143438	rs2072563	0.019025	-11.89	0.068	-0.068	0.94579
APMAP	20	24943561	24973387	0.02571	rs55704980	rs6036977	0.009598	-8.88	0.329	0.06768	0.94604
TFF2	21	43766466	43771106	0.00774	rs58569031	rs58206891	0.00226	-5.83	0.916	-0.0653	0.948
IL17RD	3	57124010	57204334	0.12749	rs139950577	rs6776722	0.155	-34.67	0.254	0.06174	0.9508
GDF15	19	18485541	18499986	0.28223	rs60570301	rs16982345	0.176533	35.78	-0.006	0.0582	0.95361
AKT1	14	105235686	105262088	0.00475	rs2498789	rs2494741	0.000426	-4.62	-1.754	0.05765	0.954
CROT	7	86974980	87029110	0.08529	rs80069206	rs31659	0.06532	22.33	0.491	0.0563	0.955083
TIRAP	11	126152960	126168740	0.20199	rs10893538	rs8177399	0.08606	-24.95	0.492	-0.05558	0.9557
PTGDS	9	139869544	139876194	0.03394	rs7029129	rs11145948	0.03471	15.88	-0.055	-0.055	0.9561
FETUB	3	186353758	186370930	0.25019	rs6797321	rs5030103	0.0416	-19.72	-1.14	-0.05491	0.9562
GFRA2	8	21547910	21669869	0.15995	rs117534676	rs15881	0.062737	21.31	-0.188	-0.0536	0.957
CPB2	13	46627321	46679168	0.27143	rs77308954	rs7988836	0.25895	43.24	0.98	0.0537	0.95721
RBP7	1	10057264	10076079	0.16397	rs17034569	rs35232720	0.106	-27.81	1.456	-0.05236	0.958
AMBP	9	116822407	116840608	0.01706	rs10982039	rs10982050	0.00813	-7.82	-0.83	-0.05244	0.9582
SERPINA9	14	94929054	94946026	0.04229	rs8004587	rs11160181	0.017196	-11.5	-0.32	0.04942	0.9606
POR	7	75528518	75616173	0.01521	rs4617087	rs59882870	0.00733	7.61	-0.887	0.0494	0.960621
C5	9	123714613	123812553	0.09977	rs1577001	rs1035029	0.02449	13.38	0.39	0.04917	0.9608
FBLN5	14	92335755	92414331	0.04077	rs941767	rs2267994	0.009389	8.54	0.606	-0.04914	0.9608
INHBA	7	41706766	41745432	0.00859	rs7795791	rs1122291	0.004008	-5.79	-0.049	0.049	0.960919
DPEP1	16	89679716	89704864	0.16532	rs113178267	rs409170	0.13083	31.18	-0.17	-0.0486	0.961
TEK	9	27109139	27230172	0.15471	rs140070570	rs35030851	0.06059	21.06	0.412	0.04696	0.9625
PMEL	12	56347889	56367101	0.02901	rs11171705	rs3213122	0.027629	14.4	-0.047	-0.047	0.9625
NAP1L4	11	2965661	3013607	0.13572	rs11821454	rs4758622	0.238863	41.53	-0.157	-0.04688	0.9626
POGLUT1	3	119187810	119213555	0.16294	rs147724020	rs17203139	0.156	34.17	-0.464	0.04452	0.9645
SPARCL1	4	88394487	88452213	0.11936	rs149720069	rs7688567	0.181218	37.26	1.352	-0.04336	0.965
CADM2	3	85008140	86123579	0.02	rs116331276	rs9880919	0.00655	7.89	0.936	0.04336	0.9654
SPHK1	17	74372665	74383941	0.0322	rs8064678	rs12941069	0.0102	8.77	0.439	0.04284	0.9658
DARS2	1	173793791	173827946	0.04659	rs114348437	rs12564699	0.0308	-16.26	-1.118	-0.04322	0.966
OGN	9	95145550	95166978	0.06675	rs12337180	rs10992291	0.15145	33.09	-0.596	0.04263	0.966
CLEC1B	12	10138241	10166023	0.11627	rs3736850	rs521040	0.064748	22.43	0.489	0.0414	0.9669
PLD3	19	40854363	40886346	0.03145	rs138515473	rs4803321	0.020549	12.41	-0.04	-0.04	0.96809
FAS	10	90750288	90776816	0.15623	rs1214565	rs7911226	0.078941	-23.93	0.088	0.0395	0.9685
TNFRSF1A	12	6437923	6451280	0.02826	rs1003563	rs1800693	0.017409	-11.41	0.039	-0.039	0.9689
TMEM132D	12	129556270	130388570	0.04722	rs10773611	rs9804953	0.009253	-9.14	0.772	-0.0363	0.9711
CTSV	9	99791959	99918838	0.03887	rs13283681	rs4743059	0.02075	12.4	0.783	0.03298	0.9737
SELP	1	169558087	169599431	0.3708	rs149160564	rs6136	0.0802	-24.12	0.371	0.03246	0.974
CNP	17	40118781	40129758	0.03523	rs28573325	rs4432296	0.031	15.14	0.178	0.03183	0.9746
ANGPTL1	1	178818670	178840212	0.12965	rs10913664	rs10913568	0.0944	-26.19	0.833	-0.03062	0.976
TIMP4	3	12194568	12200412	0.07576	rs4684859	rs184262	0.0861	25.12	0.955	-0.02996	0.9761
GNPNAT1	14	53241911	53258386	0.05646	rs7145700	rs2273743	0.056035	20.25	0.202	-0.0291	0.9768
CFHR1	1	196788861	196801319	0.221	rs41310132	rs7519758	0.298	-46.41	0.226	-0.02923	0.977
SAA2	11	18260770	18270215	0.11297	rs74232559	rs11024589	0.063297	-21.41	-0.218	0.02744	0.9781
PDCD5	19	33072096	33078359	0.2287	rs78061228	rs4499344	0.212807	39.2	0.509	-0.0269	0.9785
IGLL1	22	23915312	23922489	0.14933	rs9612506	rs9624216	0.042741	-17.62	0.757	-0.0242	0.9807
DDAH1	1	85784164	86044046	0.01065	rs817478	rs233071	0.00687	-7.16	0.022	-0.022	0.982
HGFAC	4	3443695	3451213	0.52478	rs177771	rs2498323	0.311692	-47.42	-0.127	0.0206	0.984
CCL5	17	34198495	34207797	0.05681	rs111435405	rs2107538	0.107	-28.09	0.443	0.01982	0.9842
PRDX3	10	120927232	120938324	0.0056	rs7894367	rs1810159	0.005467	-6.56	-0.019	0.019	0.9848
B4GALT2	1	44444615	44456842	0.11764	rs146072001	rs2231280	0.0907	-25.77	0.34	-0.0191	0.985
RECQL	12	21621844	21654603	0.03608	rs76818617	rs74626198	0.005838	-7.7	1.17	-0.0175	0.9861
IRF3	19	50162826	50169132	0.17296	rs73048902	rs10415576	0.096355	-26.39	0.572	0.0173	0.9862
LRP8	1	53708036	53794141	0.06527	rs6684837	rs7542607	0.03	15.09	0.111	-0.01622	0.987
DSCAM	21	41382926	42219084	0.02924	rs4818113	rs78111814	0.01894	11.89	0.339	-0.0166	0.987
MGAT4B	5	179224597	179233952	0.10799	rs12523551	rs113756550	0.0968	-26.76	0.319	0.01494	0.98808
SMOC1	14	70320848	70499083	0.13356	rs144156375	rs1958078	0.071051	22.67	-0.333	0.01399	0.9888
HS6ST1	2	128994290	129076442	0.0792	rs76442299	rs4662790	0.02909	-14.99	-0.032	0.0126	0.98993
PDIA5	3	122785872	122944074	0.36847	rs74455862	rs3804749	0.482	-58.98	0.021	0.01236	0.9901
DLK2	6	43418090	43424370	0.11208	rs9472136	rs2125739	0.06711	-22.09	-0.549	-0.0107	0.991454
ENTPD5	14	74424713	74486102	0.13505	rs115586402	rs73301475	0.166056	-34.85	0.414	-0.00955	0.9924
SEMA6A	5	115779251	115910519	0.08417	rs13167202	rs3733724	0.0227	12.89	-0.362	0.00918	0.99267
ENG	9	130577292	130616937	0.08494	rs138191463	rs11794565	0.02918	14.55	0.558	-0.00637	0.9949
PSAPL1	4	7432012	7436657	0.16502	rs66992702	rs35791045	0.095429	26.28	0.84996	0.00624	0.995
FOLR2	11	71927645	71932994	0.02521	rs1980090	rs74603010	0.00685	7.41	-0.666	0.00573	0.9954
MATN4	20	43922085	43937169	0.11691	rs170800	rs11906694	0.047275	-18.55	0.008	-0.00401	0.9968
NOG	17	54671060	54672972	0.02426	rs11658138	rs227715	0.00784	-8.78	-0.222	0.00387	0.9969
NANS	9	100819014	100845359	0.0435	rs10760184	rs7855984	0.01407	10.44	-0.621	-0.00381	0.997
ASPN	9	95218487	95244788	0.20939	rs144601499	rs2761681	0.116	-28.97	0.251	-0.00342	0.9973
S100A2	1	153533584	153540366	0.01352	rs16835455	rs58056804	0.00869	-8.32	-0.08	-0.00288	0.998
PROS1	3	93591895	93698847	0.06033	rs536799906	rs6795524	0.0089	-8.11	-0.12	0.00193	0.9985
CPXM1	20	2774720	2781273	0.4105	rs2422708	rs11697820	0.245067	42.06	-0.778	0.00183	0.99854
TXNDC12	1	52485803	52520863	0.10222	NA	NA	NA	NA	NA	NA	NA
DTYMK	2	242615162	242626359	0.12837	NA	NA	NA	NA	NA	NA	NA
LCT	2	136545420	136594754	0.34097	NA	NA	NA	NA	NA	NA	NA
ARF4	3	57557090	57583947	0.01704	NA	NA	NA	NA	NA	NA	NA
LAP3	4	17578821	17609595	0.01379	NA	NA	NA	NA	NA	NA	NA
UBLCP1	5	158690298	158713044	0.00783	NA	NA	NA	NA	NA	NA	NA
MSMB	10	51562515	51547642	0.61829	NA	NA	NA	NA	NA	NA	NA
MRC1	10	17851347	18200093	0.20436	NA	NA	NA	NA	NA	NA	NA
MINPP1	10	89264632	89313218	0.02581	NA	NA	NA	NA	NA	NA	NA
A2ML1	12	8975217	9039597	0.04291	NA	NA	NA	NA	NA	NA	NA
RBP5	12	7268332	7281485	0.10834	NA	NA	NA	NA	NA	NA	NA
TPI1	12	6976283	6980112	0.03596	NA	NA	NA	NA	NA	NA	NA
PZP	12	9301436	9360991	0.20676	NA	NA	NA	NA	NA	NA	NA
CLEC4C	12	7881979	7904201	0.10691	NA	NA	NA	NA	NA	NA	NA
PRSS27	16	2762420	2770552	0.00679	NA	NA	NA	NA	NA	NA	NA
ALDOC	17	26900133	26903966	0.02635	NA	NA	NA	NA	NA	NA	NA
PSG1	19	43370616	43383974	0.01395	NA	NA	NA	NA	NA	NA	NA
PSG4	19	43696854	43711451	0.24123	NA	NA	NA	NA	NA	NA	NA
PSG7	19	43428284	43441359	0.01621	NA	NA	NA	NA	NA	NA	NA
LONP1	19	5691845	5720583	0.00608	NA	NA	NA	NA	NA	NA	NA
PSG3	19	43225790	43244633	0.26457	NA	NA	NA	NA	NA	NA	NA
PSG5	19	43670408	43690688	0.17114	NA	NA	NA	NA	NA	NA	NA
PSG9	19	43715943	43773682	0.11247	NA	NA	NA	NA	NA	NA	NA
CD177	19	43857838	43867324	0.66904	NA	NA	NA	NA	NA	NA	NA
KIR2DL4	19	55314990	55325972	0.27266	NA	NA	NA	NA	NA	NA	NA
OXT	20	3052266	3053163	0.33125	NA	NA	NA	NA	NA	NA	NA
CRKL	22	21271695	21308035	0.05601	NA	NA	NA	NA	NA	NA	NA
