# Supplementary material for: Joint analysis of proteome, transcriptome, and multi-trait analysis to identify novel Parkinson’s disease risk genes
Source: Aging (Albany NY). 2024 Jan 17;16(2):1555–80. doi: 10.18632/aging.205444 (PMC10866412; doi:10.18632/aging.205444)
Supplement: Supplementary Table 8 [file aging-16-205444-s007.xlsx]

## Sheet: Sheet1
Supplementary Table 8. PWAS and TWAS identified PD-associated genes of PD MTAG
Gene	Chr	PWAS							SMR								TWAS significant
		ROSMAP		Banner		Plasma			ROSMAP		BRAIN(Yang al.)		CSF(Yang a.l)		Plasma
		Zscore	P-valuea	Zscore	P-valueb	Zscore	P-valuec		p_SMR	p_HEIDI	p_SMR	p_HEIDI	p_SMR	p_HEIDI	p_SMR	p_HEIDI
EFNA3	1	-5.65	1.62e-08	-	-	-	-
FLAD1	1	4.54	5.6e-06	-	-	-	-
RAB29	1	6.63	3.46e-11	-	-	-	-										Suggestive
FCGR2B	1	-	-	-	-	-	-						7.72663e-05	0.734372
CD38	4	-6.8	1.05e-11	-6.19	6.18e-10	-	-		1.08295e-06	0.329729							Suggestive
BST1	4	-	-	-	-	5.73	1.03e-08
GAK	4	-1.27	0.206	-4.87	1.13e-06	-	-
TMEM175	4	-10.38	3.09e-25	-	-	-	-										Suggestive
GPNMB	7	5.36	8.43e-08	5.78	7.48e-09	3.49	0.000482				1.4483e-06	0.520274	2.21639e-08	0.821304	0.560441	0.582995	Suggestive
CTSB	-	-3.66	0.000251	-3.85	0.000116	-4.83	1.36e-06						7.11201e-05	0.0231036
HIP1R	12	-4.23	2.39e-05	-1.27	0.203	-	-
STX4	16	4.75	2e-06	-	-	-	-										Suggestive
TTC19	17	-5.22	1.77e-07	-2.28	0.0228	-	-										Suggestive
NSF	17	-4.39	1.14e-05	-	-	-	-
ARSA	22	4.13	3.57e-05	4.23	2.35e-05	-	-
aProteome-wide significance level in the ROSMAP dataset was set at p<3.39E-5 (adjusted by Bonferroni multiple testing correction method).
bProteome-wide significance level in the Banner dataset was set at p<4.36E-5 (adjusted by Bonferroni multiple testing correction method)
cProteome-wide significance level in the Plasma dataset was set at p<3.78E-5 (adjusted by Bonferroni multiple testing correction method)
The genes in bold are the ones that are significant in both PWAS and TWAS.
