# Supplementary material for: Joint analysis of proteome, transcriptome, and multi-trait analysis to identify novel Parkinson’s disease risk genes
Source: Aging (Albany NY). 2024 Jan 17;16(2):1555–80. doi: 10.18632/aging.205444 (PMC10866412; doi:10.18632/aging.205444)
Supplement: Supplementary Table 10 [file aging-16-205444-s009.xlsx]

## Sheet: Sheet1
	Supplementary Table 10. Full results of TWAS (using SNP expression weights from JTI) for PD risk across 22 tissues (PD GWAS).
gene	gene_name	zscore	effect_size	p-value	pred_perf_r2	pred_perf_pval	n_snps_used	model
ENSG00000275413	AC002553.2	-4.81097	-1.40023	1.502e-06	0.0494986	0.0112715	1	Brain_Amygdala
ENSG00000232748	AC135050.1	4.90781	0.951919	9.21005e-07	0.0473404	0.0132524	2	Brain_Amygdala
ENSG00000260911	AC135050.3	-4.96779	-0.230754	6.7721e-07	0.0858583	0.000751932	6	Brain_Amygdala
ENSG00000196118	CCDC189	4.75874	0.736516	1.94801e-06	0.109317	0.000129772	1	Brain_Amygdala
ENSG00000004468	CD38	-7.54728	-0.50019	4.44432e-14	0.0780681	0.00134278	2	Brain_Amygdala
ENSG00000145214	DGKQ	-5.46306	-0.837567	4.68004e-08	0.0472909	0.0133018	1	Brain_Amygdala
ENSG00000214401	KANSL1-AS1	-9.00083	-0.234309	2.24021e-19	0.552675	6.16385e-24	14	Brain_Amygdala
ENSG00000103510	KAT8	-5.56622	-0.151387	2.60322e-08	0.157045	3.33617e-06	4	Brain_Amygdala
ENSG00000122550	KLHL7	-4.48764	-0.399069	7.20162e-06	0.0309927	0.0459702	11	Brain_Amygdala
ENSG00000230658	KLHL7-DT	-5.09301	-0.0868544	3.5243e-07	0.494811	1.47204e-20	12	Brain_Amygdala
ENSG00000264589	MAPT-AS1	6.31301	0.664146	2.73663e-10	0.110245	0.000120996	8	Brain_Amygdala
ENSG00000138722	MMRN1	8.30485	0.242047	9.9943e-17	0.322686	2.20378e-12	9	Brain_Amygdala
ENSG00000141027	NCOR1	5.23906	0.485759	1.61395e-07	0.0546965	0.00764112	9	Brain_Amygdala
ENSG00000136243	NUPL2	5.29904	0.176343	1.16412e-07	0.158159	3.05735e-06	3	Brain_Amygdala
ENSG00000225190	PLEKHM1	-8.00563	-0.951804	1.18855e-15	0.170615	1.14582e-06	5	Brain_Amygdala
ENSG00000178226	PRSS36	-4.54834	-0.142578	5.40695e-06	0.158715	2.9271e-06	3	Brain_Amygdala
ENSG00000151006	PRSS53	5.01707	0.555205	5.24663e-07	0.0362955	0.0305714	9	Brain_Amygdala
ENSG00000117280	RAB29	6.20889	0.227455	5.33585e-10	0.0502632	0.010644	7	Brain_Amygdala
ENSG00000103549	RNF40	-5.40702	-0.493168	6.40831e-08	0.0689848	0.0026378	2	Brain_Amygdala
ENSG00000145335	SNCA	-6.1033	-0.972037	1.03899e-09	0.0498553	0.0109742	4	Brain_Amygdala
ENSG00000103496	STX4	5.47568	0.746705	4.35827e-08	0.0695574	0.00252789	2	Brain_Amygdala
ENSG00000127419	TMEM175	-6.18151	-0.494739	6.34903e-10	0.0888786	0.000600328	2	Brain_Amygdala
ENSG00000011295	TTC19	-5.15601	-0.394874	2.5227e-07	0.144122	9.11718e-06	2	Brain_Amygdala
ENSG00000214941	ZSWIM7	5.03888	0.165763	4.68259e-07	0.266058	3.95689e-10	7	Brain_Amygdala
ENSG00000275413	AC002553.2	-5.07432	-1.66223	3.88885e-07	0.0371628	0.0193185	2	Brain_Anterior_cingulate_cortex_BA24
ENSG00000226816	AC005082.1	-5.99311	-0.224768	2.05862e-09	0.0594997	0.00290799	8	Brain_Anterior_cingulate_cortex_BA24
ENSG00000267198	AC091132.4	5.16325	0.311227	2.427e-07	0.150103	1.24739e-06	1	Brain_Anterior_cingulate_cortex_BA24
ENSG00000274678	AC106886.3	-5.50797	-1.73824	3.62988e-08	0.0308852	0.0332405	6	Brain_Anterior_cingulate_cortex_BA24
ENSG00000232748	AC135050.1	5.38297	0.528225	7.32683e-08	0.06181	0.00239421	5	Brain_Anterior_cingulate_cortex_BA24
ENSG00000260911	AC135050.3	-5.0743	-0.216313	3.88917e-07	0.146948	1.64778e-06	6	Brain_Anterior_cingulate_cortex_BA24
ENSG00000170425	ADORA2B	5.11901	0.239017	3.07146e-07	0.110703	3.82973e-05	7	Brain_Anterior_cingulate_cortex_BA24
ENSG00000196118	CCDC189	5.58754	0.361788	2.30307e-08	0.0914856	0.000196479	7	Brain_Anterior_cingulate_cortex_BA24
ENSG00000004468	CD38	-7.12334	-0.359992	1.05341e-12	0.104741	6.37332e-05	6	Brain_Anterior_cingulate_cortex_BA24
ENSG00000178950	GAK	5.76905	2.11223	7.97189e-09	0.112279	3.34601e-05	2	Brain_Anterior_cingulate_cortex_BA24
ENSG00000127415	IDUA	-7.12106	-1.70625	1.07099e-12	0.0341253	0.0250955	3	Brain_Anterior_cingulate_cortex_BA24
ENSG00000214401	KANSL1-AS1	-8.36877	-0.355742	5.82251e-17	0.585371	1.64089e-29	13	Brain_Anterior_cingulate_cortex_BA24
ENSG00000103510	KAT8	-5.34095	-0.143908	9.24607e-08	0.180977	7.81943e-08	9	Brain_Anterior_cingulate_cortex_BA24
ENSG00000230658	KLHL7-DT	-5.23457	-0.0986445	1.65366e-07	0.589979	7.26915e-30	6	Brain_Anterior_cingulate_cortex_BA24
ENSG00000176681	LRRC37A	-7.37366	-0.322224	1.66012e-13	0.610701	1.66457e-31	2	Brain_Anterior_cingulate_cortex_BA24
ENSG00000138722	MMRN1	7.94051	0.194188	2.01344e-15	0.278918	6.22795e-12	40	Brain_Anterior_cingulate_cortex_BA24
ENSG00000136243	NUPL2	5.42868	0.140521	5.67734e-08	0.340283	8.96312e-15	10	Brain_Anterior_cingulate_cortex_BA24
ENSG00000225190	PLEKHM1	-8.1244	-1.00915	4.49594e-16	0.198664	1.53753e-08	3	Brain_Anterior_cingulate_cortex_BA24
ENSG00000156858	PRR14	5.04056	1.0632	4.64162e-07	0.0607073	0.00262697	3	Brain_Anterior_cingulate_cortex_BA24
ENSG00000117280	RAB29	6.97325	0.351652	3.09698e-12	0.116051	2.42095e-05	8	Brain_Anterior_cingulate_cortex_BA24
ENSG00000103549	RNF40	-4.73447	-0.234129	2.19633e-06	0.0628183	0.00219951	7	Brain_Anterior_cingulate_cortex_BA24
ENSG00000107295	SH3GL2	4.69487	0.457846	2.66771e-06	0.0844358	0.000356497	4	Brain_Anterior_cingulate_cortex_BA24
ENSG00000103496	STX4	5.47705	0.797628	4.32463e-08	0.151061	1.14604e-06	2	Brain_Anterior_cingulate_cortex_BA24
ENSG00000011295	TTC19	-5.24014	-0.227977	1.60457e-07	0.0345221	0.0242499	5	Brain_Anterior_cingulate_cortex_BA24
ENSG00000167397	VKORC1	4.5396	0.504756	5.63599e-06	0.0365181	0.0204189	1	Brain_Anterior_cingulate_cortex_BA24
ENSG00000214941	ZSWIM7	5.22989	0.159157	1.69613e-07	0.544613	1.52281e-26	9	Brain_Anterior_cingulate_cortex_BA24
ENSG00000275413	AC002553.2	-5.24986	-0.714125	1.52212e-07	0.0224041	0.037244	3	Brain_Caudate_basal_ganglia
ENSG00000226816	AC005082.1	-5.82317	-0.270125	5.77404e-09	0.211267	1.56535e-11	1	Brain_Caudate_basal_ganglia
ENSG00000267198	AC091132.4	5.16325	0.318902	2.427e-07	0.0640889	0.000368759	1	Brain_Caudate_basal_ganglia
ENSG00000170425	ADORA2B	5.50726	0.47913	3.64459e-08	0.086332	3.20778e-05	10	Brain_Caudate_basal_ganglia
ENSG00000159314	ARHGAP27	-9.079	-0.681592	1.09574e-19	0.122012	5.97811e-07	10	Brain_Caudate_basal_ganglia
ENSG00000185829	ARL17A	-5.60966	-0.330023	2.02728e-08	0.379656	1.14598e-21	12	Brain_Caudate_basal_ganglia
ENSG00000196118	CCDC189	5.59642	0.358543	2.18823e-08	0.182368	5.31242e-10	7	Brain_Caudate_basal_ganglia
ENSG00000004468	CD38	-7.72107	-0.346563	1.15356e-14	0.204845	3.4601e-11	6	Brain_Caudate_basal_ganglia
ENSG00000120088	CRHR1	5.85225	0.349287	4.8496e-09	0.108623	2.69709e-06	22	Brain_Caudate_basal_ganglia
ENSG00000214401	KANSL1-AS1	-8.90291	-0.223592	5.44019e-19	0.647089	2.68435e-45	20	Brain_Caudate_basal_ganglia
ENSG00000103510	KAT8	-5.61422	-0.144012	1.9745e-08	0.204582	3.57381e-11	10	Brain_Caudate_basal_ganglia
ENSG00000122550	KLHL7	-4.66807	-0.481655	3.04036e-06	0.0989166	7.9632e-06	15	Brain_Caudate_basal_ganglia
ENSG00000230658	KLHL7-DT	-5.0847	-0.0866656	3.68202e-07	0.583132	2.48397e-38	12	Brain_Caudate_basal_ganglia
ENSG00000176681	LRRC37A	-7.46988	-0.352732	8.02684e-14	0.594686	1.65583e-39	2	Brain_Caudate_basal_ganglia
ENSG00000264589	MAPT-AS1	6.97175	0.235271	3.13013e-12	0.221916	4.14613e-12	22	Brain_Caudate_basal_ganglia
ENSG00000279685	MAPT-IT1	-8.40807	-0.830627	4.16824e-17	0.069163	0.000211588	9	Brain_Caudate_basal_ganglia
ENSG00000138722	MMRN1	8.46701	0.225059	2.51762e-17	0.198752	7.30411e-11	16	Brain_Caudate_basal_ganglia
ENSG00000141027	NCOR1	5.15106	0.425984	2.59016e-07	0.0322784	0.0121878	8	Brain_Caudate_basal_ganglia
ENSG00000136243	NUPL2	5.59416	0.163563	2.21697e-08	0.295426	2.63197e-16	13	Brain_Caudate_basal_ganglia
ENSG00000225190	PLEKHM1	-8.20136	-0.594114	2.37678e-16	0.206555	2.80277e-11	7	Brain_Caudate_basal_ganglia
ENSG00000117280	RAB29	6.16979	0.177758	6.83807e-10	0.198474	7.55694e-11	16	Brain_Caudate_basal_ganglia
ENSG00000138760	SCARB2	4.90836	0.324364	9.18392e-07	0.110318	2.23066e-06	21	Brain_Caudate_basal_ganglia
ENSG00000145335	SNCA	-7.12775	-1.41993	1.02025e-12	0.0385143	0.00609712	4	Brain_Caudate_basal_ganglia
ENSG00000198648	STK39	-5.30511	-0.724854	1.12606e-07	0.0656685	0.000310217	4	Brain_Caudate_basal_ganglia
ENSG00000103496	STX4	5.45117	0.552257	5.0039e-08	0.0420942	0.00410737	3	Brain_Caudate_basal_ganglia
ENSG00000011295	TTC19	-5.15291	-0.202026	2.56469e-07	0.229597	1.57387e-12	10	Brain_Caudate_basal_ganglia
ENSG00000167395	ZNF646	-5.37351	-0.438345	7.72191e-08	0.0608109	0.000527852	4	Brain_Caudate_basal_ganglia
ENSG00000214941	ZSWIM7	5.06764	0.130371	4.02788e-07	0.34516	2.16539e-19	2	Brain_Caudate_basal_ganglia
ENSG00000227782	AC002553.1	4.94672	0.675857	7.5473e-07	0.0815405	0.000127879	4	Brain_Cerebellar_Hemisphere
ENSG00000226816	AC005082.1	-5.62916	-0.252974	1.81093e-08	0.10361	1.40037e-05	8	Brain_Cerebellar_Hemisphere
ENSG00000267121	AC008105.3	8.3798	0.904667	5.30179e-17	0.0979421	2.47816e-05	9	Brain_Cerebellar_Hemisphere
ENSG00000236234	AC091132.2	9.35633	1.77019	8.25572e-21	0.120529	2.51394e-06	2	Brain_Cerebellar_Hemisphere
ENSG00000267198	AC091132.4	5.09384	0.272694	3.50892e-07	0.275188	9.23969e-14	2	Brain_Cerebellar_Hemisphere
ENSG00000260911	AC135050.3	-5.04327	-0.204204	4.57646e-07	0.238779	6.86124e-12	9	Brain_Cerebellar_Hemisphere
ENSG00000262766	AC135050.5	-4.74841	-0.562153	2.05019e-06	0.0533784	0.00209681	6	Brain_Cerebellar_Hemisphere
ENSG00000260262	AC139887.3	5.52107	1.14765	3.36933e-08	0.0318238	0.0181779	4	Brain_Cerebellar_Hemisphere
ENSG00000170425	ADORA2B	5.10039	0.154072	3.38946e-07	0.271992	1.35953e-13	4	Brain_Cerebellar_Hemisphere
ENSG00000159314	ARHGAP27	-7.59266	-0.366571	3.13409e-14	0.222039	4.66232e-11	10	Brain_Cerebellar_Hemisphere
ENSG00000185829	ARL17A	-7.26796	-0.23108	3.64964e-13	0.581608	1.46281e-34	28	Brain_Cerebellar_Hemisphere
ENSG00000196118	CCDC189	4.68622	0.31782	2.78303e-06	0.0513377	0.00256827	12	Brain_Cerebellar_Hemisphere
ENSG00000130783	CCDC62	5.60391	0.628081	2.09572e-08	0.0988312	2.26625e-05	4	Brain_Cerebellar_Hemisphere
ENSG00000004468	CD38	-6.45101	-0.329247	1.11106e-10	0.0618513	0.000904368	11	Brain_Cerebellar_Hemisphere
ENSG00000237765	FAM200B	5.99319	0.156593	2.05764e-09	0.38673	4.13646e-20	20	Brain_Cerebellar_Hemisphere
ENSG00000232300	FAM215B	-7.65078	-0.622561	1.9977e-14	0.358604	2.07532e-18	6	Brain_Cerebellar_Hemisphere
ENSG00000184922	FMNL1	8.16876	0.441579	3.11584e-16	0.364383	9.41283e-19	12	Brain_Cerebellar_Hemisphere
ENSG00000178950	GAK	6.18652	0.234347	6.15083e-10	0.13697	4.63187e-07	13	Brain_Cerebellar_Hemisphere
ENSG00000130787	HIP1R	-5.87674	-0.218912	4.18412e-09	0.129327	1.01991e-06	22	Brain_Cerebellar_Hemisphere
ENSG00000080854	IGSF9B	-5.2119	-0.463468	1.86921e-07	0.0271893	0.0292108	3	Brain_Cerebellar_Hemisphere
ENSG00000214401	KANSL1-AS1	-7.88814	-0.372639	3.06714e-15	0.605615	8.64311e-37	12	Brain_Cerebellar_Hemisphere
ENSG00000103510	KAT8	-5.57037	-0.128486	2.54198e-08	0.361796	1.34214e-18	13	Brain_Cerebellar_Hemisphere
ENSG00000230658	KLHL7-DT	-5.1117	-0.089641	3.19272e-07	0.464178	3.20928e-25	7	Brain_Cerebellar_Hemisphere
ENSG00000238083	LRRC37A2	-7.96239	-0.279741	1.68746e-15	0.672032	9.70189e-44	18	Brain_Cerebellar_Hemisphere
ENSG00000186868	MAPT	7.64834	0.934009	2.03595e-14	0.0518215	0.00244767	4	Brain_Cerebellar_Hemisphere
ENSG00000264589	MAPT-AS1	7.34372	0.396916	2.0774e-13	0.113644	5.07031e-06	13	Brain_Cerebellar_Hemisphere
ENSG00000279685	MAPT-IT1	-9.25816	-1.90032	2.0799e-20	0.0509754	0.00266246	2	Brain_Cerebellar_Hemisphere
ENSG00000243368	MCCC1-AS1	-5.16851	-0.39622	2.35968e-07	0.0880353	6.6885e-05	6	Brain_Cerebellar_Hemisphere
ENSG00000138722	MMRN1	7.91084	0.277939	2.55648e-15	0.132962	7.01139e-07	6	Brain_Cerebellar_Hemisphere
ENSG00000136448	NMT1	5.04912	0.226145	4.43854e-07	0.132824	7.11239e-07	22	Brain_Cerebellar_Hemisphere
ENSG00000073969	NSF	4.67534	0.851081	2.93473e-06	0.221082	5.19626e-11	8	Brain_Cerebellar_Hemisphere
ENSG00000136243	NUPL2	5.51682	0.126081	3.45185e-08	0.484457	1.1167e-26	13	Brain_Cerebellar_Hemisphere
ENSG00000117280	RAB29	6.04005	0.183897	1.5407e-09	0.201812	4.49362e-10	9	Brain_Cerebellar_Hemisphere
ENSG00000138760	SCARB2	4.79258	0.57254	1.6465e-06	0.0462841	0.00424762	7	Brain_Cerebellar_Hemisphere
ENSG00000099381	SETD1A	-5.77821	-1.41065	7.55004e-09	0.0520684	0.00238832	4	Brain_Cerebellar_Hemisphere
ENSG00000145217	SLC26A1	4.86993	0.106741	1.11638e-06	0.393525	1.56451e-20	10	Brain_Cerebellar_Hemisphere
ENSG00000185294	SPPL2C	-9.48729	-0.453513	2.3712e-21	0.368775	5.13657e-19	7	Brain_Cerebellar_Hemisphere
ENSG00000127419	TMEM175	-6.2165	-0.445919	5.08378e-10	0.180382	4.68782e-09	2	Brain_Cerebellar_Hemisphere
ENSG00000011295	TTC19	-5.35531	-0.273573	8.54116e-08	0.0460537	0.00434632	3	Brain_Cerebellar_Hemisphere
ENSG00000167395	ZNF646	-5.28244	-0.457986	1.27476e-07	0.0529616	0.00218547	3	Brain_Cerebellar_Hemisphere
ENSG00000167394	ZNF668	5.46942	3.55114	4.515e-08	0.0284237	0.0257285	4	Brain_Cerebellar_Hemisphere
ENSG00000214941	ZSWIM7	-5.14198	-0.230743	2.71856e-07	0.33488	4.96507e-17	3	Brain_Cerebellar_Hemisphere
ENSG00000227782	AC002553.1	4.86012	0.271897	1.17314e-06	0.0581328	0.000436832	2	Brain_Cerebellum
ENSG00000226816	AC005082.1	-5.98858	-0.224984	2.11675e-09	0.10546	1.60813e-06	6	Brain_Cerebellum
ENSG00000267121	AC008105.3	8.94489	1.01325	3.72332e-19	0.1259	1.35389e-07	8	Brain_Cerebellum
ENSG00000236234	AC091132.2	5.94008	0.347505	2.84878e-09	0.16008	1.94793e-09	10	Brain_Cerebellum
ENSG00000267198	AC091132.4	5.0811	0.268812	3.75246e-07	0.19537	2.08463e-11	2	Brain_Cerebellum
ENSG00000260911	AC135050.3	-5.04739	-0.204455	4.47889e-07	0.399408	1.05358e-24	9	Brain_Cerebellum
ENSG00000262766	AC135050.5	-5.38351	-0.378075	7.30471e-08	0.08233	2.52938e-05	3	Brain_Cerebellum
ENSG00000170425	ADORA2B	5.08942	0.150503	3.59168e-07	0.104148	1.88235e-06	6	Brain_Cerebellum
ENSG00000159314	ARHGAP27	-7.47334	-0.301641	7.81825e-14	0.3492	4.5702e-21	10	Brain_Cerebellum
ENSG00000185829	ARL17A	-5.81898	-0.278345	5.92089e-09	0.594722	1.80838e-42	27	Brain_Cerebellum
ENSG00000196118	CCDC189	5.53174	0.38252	3.17072e-08	0.0420856	0.00288478	7	Brain_Cerebellum
ENSG00000130783	CCDC62	5.13811	0.743613	2.77518e-07	0.111884	7.42166e-07	4	Brain_Cerebellum
ENSG00000004468	CD38	-6.43587	-0.315676	1.22768e-10	0.0881209	1.27364e-05	11	Brain_Cerebellum
ENSG00000262372	CR936218.1	4.95526	0.535066	7.22324e-07	0.0187803	0.0478562	5	Brain_Cerebellum
ENSG00000164733	CTSB	-4.83442	-0.184361	1.33532e-06	0.153457	4.48024e-09	14	Brain_Cerebellum
ENSG00000145214	DGKQ	-4.90531	-0.151438	9.3282e-07	0.219367	8.59049e-13	13	Brain_Cerebellum
ENSG00000184922	FMNL1	8.89001	0.47709	6.11027e-19	0.344783	9.26138e-21	8	Brain_Cerebellum
ENSG00000178950	GAK	6.13887	0.274811	8.31102e-10	0.100946	2.76286e-06	10	Brain_Cerebellum
ENSG00000130787	HIP1R	-6.78795	-0.276545	1.13738e-11	0.270616	6.88284e-16	5	Brain_Cerebellum
ENSG00000080854	IGSF9B	-5.08314	-0.378081	3.71244e-07	0.247618	1.78577e-14	4	Brain_Cerebellum
ENSG00000214401	KANSL1-AS1	-7.95414	-0.367916	1.80379e-15	0.633362	5.49513e-47	12	Brain_Cerebellum
ENSG00000103510	KAT8	-5.53182	-0.14021	3.16921e-08	0.400926	8.09181e-25	9	Brain_Cerebellum
ENSG00000230658	KLHL7-DT	-5.10524	-0.0916883	3.30375e-07	0.449882	1.12608e-28	9	Brain_Cerebellum
ENSG00000176681	LRRC37A	-8.73892	-0.389115	2.35352e-18	0.639676	9.05742e-48	4	Brain_Cerebellum
ENSG00000238083	LRRC37A2	-7.90683	-0.277391	2.64019e-15	0.698662	7.99019e-56	20	Brain_Cerebellum
ENSG00000186868	MAPT	6.26483	0.810427	3.73225e-10	0.0684396	0.00013013	4	Brain_Cerebellum
ENSG00000264589	MAPT-AS1	7.86249	0.552295	3.76577e-15	0.0574756	0.000471879	10	Brain_Cerebellum
ENSG00000279685	MAPT-IT1	-9.29004	-1.7149	1.54229e-20	0.135548	4.14642e-08	6	Brain_Cerebellum
ENSG00000138722	MMRN1	6.89104	0.221574	5.53873e-12	0.141672	1.94586e-08	5	Brain_Cerebellum
ENSG00000073969	NSF	6.86926	3.57783	6.45357e-12	0.205458	5.51418e-12	1	Brain_Cerebellum
ENSG00000136243	NUPL2	5.50984	0.123398	3.59158e-08	0.454518	4.66666e-29	16	Brain_Cerebellum
ENSG00000225190	PLEKHM1	9.48863	0.309513	2.34088e-21	0.602922	2.16581e-43	25	Brain_Cerebellum
ENSG00000117280	RAB29	6.06552	0.18157	1.31527e-09	0.240443	4.83718e-14	10	Brain_Cerebellum
ENSG00000138760	SCARB2	6.14092	0.381523	8.20454e-10	0.101811	2.4909e-06	20	Brain_Cerebellum
ENSG00000099381	SETD1A	-5.67138	-0.372751	1.41652e-08	0.0651829	0.000190835	7	Brain_Cerebellum
ENSG00000185294	SPPL2C	-9.29626	-0.289716	1.45477e-20	0.37745	4.45311e-23	7	Brain_Cerebellum
ENSG00000099365	STX1B	-4.72624	-0.452931	2.2872e-06	0.113943	5.7877e-07	8	Brain_Cerebellum
ENSG00000127419	TMEM175	-6.57057	-0.228164	5.01223e-11	0.213324	1.93399e-12	4	Brain_Cerebellum
ENSG00000167397	VKORC1	5.12212	0.36589	3.02113e-07	0.029663	0.0126446	3	Brain_Cerebellum
ENSG00000167395	ZNF646	-5.28715	-0.453443	1.24235e-07	0.0438317	0.00234763	3	Brain_Cerebellum
ENSG00000214941	ZSWIM7	-5.17381	-0.20421	2.29364e-07	0.425497	1.03027e-26	4	Brain_Cerebellum
ENSG00000275413	AC002553.2	-5.19346	-0.753575	2.06416e-07	0.0304246	0.0123724	4	Brain_Cortex
ENSG00000226816	AC005082.1	-6.05743	-0.222791	1.38316e-09	0.0302654	0.0126069	9	Brain_Cortex
ENSG00000267198	AC091132.4	5.11358	0.281547	3.16105e-07	0.0966201	5.72818e-06	2	Brain_Cortex
ENSG00000274678	AC106886.3	-5.51869	-0.684435	3.41538e-08	0.0291125	0.0144456	2	Brain_Cortex
ENSG00000232748	AC135050.1	5.39695	0.588995	6.77847e-08	0.0256411	0.0218197	6	Brain_Cortex
ENSG00000260911	AC135050.3	-4.97452	-0.19357	6.54081e-07	0.151478	8.0469e-09	11	Brain_Cortex
ENSG00000278133	AC135050.6	4.60569	0.738165	4.11107e-06	0.0465994	0.00187971	2	Brain_Cortex
ENSG00000170425	ADORA2B	5.09402	0.152452	3.50546e-07	0.133002	7.61568e-08	5	Brain_Cortex
ENSG00000159314	ARHGAP27	-7.95812	-0.691954	1.74679e-15	0.130846	9.87463e-08	7	Brain_Cortex
ENSG00000185829	ARL17A	-6.41301	-0.332222	1.4267e-10	0.518643	4.55772e-34	15	Brain_Cortex
ENSG00000099385	BCL7C	-5.26431	-1.33467	1.40716e-07	0.0713852	0.000107643	7	Brain_Cortex
ENSG00000196118	CCDC189	5.59544	0.353127	2.20065e-08	0.216613	2.04683e-12	7	Brain_Cortex
ENSG00000004468	CD38	-7.66135	-0.339315	1.83992e-14	0.232332	2.52904e-13	14	Brain_Cortex
ENSG00000120088	CRHR1	-6.807	-1.20142	9.96566e-12	0.0192329	0.0473577	4	Brain_Cortex
ENSG00000099377	HSD3B7	-5.85403	-0.440644	4.79805e-09	0.0635946	0.000264581	8	Brain_Cortex
ENSG00000127415	IDUA	-6.35902	-0.676271	2.03048e-10	0.0351469	0.00710826	5	Brain_Cortex
ENSG00000080854	IGSF9B	-5.20356	-0.591903	1.95508e-07	0.0757393	6.50576e-05	6	Brain_Cortex
ENSG00000214401	KANSL1-AS1	-8.85795	-0.220034	8.14993e-19	0.674248	2.45589e-51	22	Brain_Cortex
ENSG00000103510	KAT8	-5.6127	-0.142656	1.99196e-08	0.364206	9.99992e-22	7	Brain_Cortex
ENSG00000230658	KLHL7-DT	-5.07831	-0.086665	3.80809e-07	0.610751	1.82592e-43	12	Brain_Cortex
ENSG00000176681	LRRC37A	-5.74801	-0.412894	9.03026e-09	0.664468	4.98078e-50	17	Brain_Cortex
ENSG00000238083	LRRC37A2	-7.72891	-0.230008	1.08472e-14	0.730578	1.00923e-59	40	Brain_Cortex
ENSG00000243368	MCCC1-AS1	-5.42487	-0.555518	5.79974e-08	0.0511726	0.00110839	5	Brain_Cortex
ENSG00000260083	MIR762HG	-4.57552	-1.57335	4.75031e-06	0.0441703	0.00248969	4	Brain_Cortex
ENSG00000138722	MMRN1	8.70768	0.248453	3.10167e-18	0.177688	3.08829e-10	15	Brain_Cortex
ENSG00000164182	NDUFAF2	5.7133	0.629841	1.10806e-08	0.0693051	0.000136883	4	Brain_Cortex
ENSG00000136243	NUPL2	5.52663	0.122573	3.26449e-08	0.388835	1.75641e-23	10	Brain_Cortex
ENSG00000225190	PLEKHM1	-8.16508	-0.895538	3.21222e-16	0.287031	1.25966e-16	4	Brain_Cortex
ENSG00000117280	RAB29	6.76731	0.291794	1.31199e-11	0.169617	8.50853e-10	8	Brain_Cortex
ENSG00000138760	SCARB2	5.31795	0.781723	1.04944e-07	0.0272325	0.0180518	5	Brain_Cortex
ENSG00000185294	SPPL2C	-6.92043	-0.923923	4.50281e-12	0.0675875	0.000166907	8	Brain_Cortex
ENSG00000103496	STX4	5.45015	0.841916	5.03276e-08	0.0694044	0.000135322	3	Brain_Cortex
ENSG00000127419	TMEM175	-4.94559	-0.195566	7.59134e-07	0.137569	4.38562e-08	13	Brain_Cortex
ENSG00000011295	TTC19	-5.39963	-0.259655	6.67781e-08	0.114123	7.28147e-07	5	Brain_Cortex
ENSG00000167397	VKORC1	5.14908	0.372336	2.6177e-07	0.104313	2.32132e-06	3	Brain_Cortex
ENSG00000167394	ZNF668	4.86964	9.94687	1.118e-06	0.0326148	0.00956236	1	Brain_Cortex
ENSG00000214941	ZSWIM7	5.20234	0.114079	1.96791e-07	0.515311	9.20872e-34	4	Brain_Cortex
ENSG00000226816	AC005082.1	-5.59595	-0.278525	2.19414e-08	0.085633	8.50237e-05	5	Brain_Frontal_Cortex_BA9
ENSG00000232748	AC135050.1	4.86711	0.616854	1.13244e-06	0.0412009	0.00705927	2	Brain_Frontal_Cortex_BA9
ENSG00000260911	AC135050.3	-4.98289	-0.238238	6.26415e-07	0.0995773	2.10238e-05	8	Brain_Frontal_Cortex_BA9
ENSG00000170425	ADORA2B	5.08138	0.213249	3.74698e-07	0.138936	3.77753e-07	3	Brain_Frontal_Cortex_BA9
ENSG00000159314	ARHGAP27	-5.69525	-0.329152	1.23189e-08	0.0713216	0.000353349	7	Brain_Frontal_Cortex_BA9
ENSG00000185829	ARL17A	-6.53135	-0.338024	6.51795e-11	0.527336	5.85949e-30	14	Brain_Frontal_Cortex_BA9
ENSG00000196118	CCDC189	5.36587	0.299402	8.05592e-08	0.198962	6.1577e-10	13	Brain_Frontal_Cortex_BA9
ENSG00000004468	CD38	-7.57289	-0.379423	3.65005e-14	0.0614855	0.000937786	11	Brain_Frontal_Cortex_BA9
ENSG00000127415	IDUA	-7.04955	-1.75595	1.79496e-12	0.0374087	0.0103312	3	Brain_Frontal_Cortex_BA9
ENSG00000214401	KANSL1-AS1	-8.71599	-0.198488	2.8824e-18	0.63142	2.43063e-39	24	Brain_Frontal_Cortex_BA9
ENSG00000103510	KAT8	-5.62283	-0.142439	1.87858e-08	0.26052	5.367e-13	10	Brain_Frontal_Cortex_BA9
ENSG00000230658	KLHL7-DT	-5.0833	-0.0866994	3.70924e-07	0.580003	2.03979e-34	12	Brain_Frontal_Cortex_BA9
ENSG00000238083	LRRC37A2	-8.02705	-0.251088	9.98448e-16	0.701871	2.47773e-47	24	Brain_Frontal_Cortex_BA9
ENSG00000243368	MCCC1-AS1	-5.35973	-0.52585	8.33474e-08	0.0536782	0.00203528	7	Brain_Frontal_Cortex_BA9
ENSG00000138722	MMRN1	8.71686	0.243396	2.86034e-18	0.240942	5.34126e-12	15	Brain_Frontal_Cortex_BA9
ENSG00000136243	NUPL2	5.55967	0.109065	2.70291e-08	0.393711	1.52325e-20	18	Brain_Frontal_Cortex_BA9
ENSG00000225190	PLEKHM1	-8.21073	-0.945084	2.19841e-16	0.222759	4.2969e-11	7	Brain_Frontal_Cortex_BA9
ENSG00000117280	RAB29	6.76601	0.349081	1.32385e-11	0.176867	6.85087e-09	8	Brain_Frontal_Cortex_BA9
ENSG00000103549	RNF40	-5.10551	-0.493908	3.29898e-07	0.0370214	0.0107421	1	Brain_Frontal_Cortex_BA9
ENSG00000138760	SCARB2	5.95586	0.422664	2.58706e-09	0.0772546	0.000195937	20	Brain_Frontal_Cortex_BA9
ENSG00000185294	SPPL2C	-6.27356	-0.439994	3.52881e-10	0.0668948	0.000548326	10	Brain_Frontal_Cortex_BA9
ENSG00000103496	STX4	5.47436	0.83396	4.39095e-08	0.164641	2.53661e-08	3	Brain_Frontal_Cortex_BA9
ENSG00000127419	TMEM175	-4.92623	-0.205989	8.38331e-07	0.160592	3.89896e-08	8	Brain_Frontal_Cortex_BA9
ENSG00000167395	ZNF646	-5.82057	-0.692446	5.86457e-09	0.0581861	0.00130097	6	Brain_Frontal_Cortex_BA9
ENSG00000167394	ZNF668	4.88146	7.51669	1.05306e-06	0.0332145	0.0157831	2	Brain_Frontal_Cortex_BA9
ENSG00000214941	ZSWIM7	5.24059	0.161525	1.60063e-07	0.38576	4.74766e-20	10	Brain_Frontal_Cortex_BA9
ENSG00000226816	AC005082.1	-5.90073	-0.228383	3.61902e-09	0.122888	3.91121e-06	4	Brain_Hippocampus
ENSG00000267198	AC091132.4	5.16325	0.404647	2.427e-07	0.0779722	0.000281135	1	Brain_Hippocampus
ENSG00000232748	AC135050.1	4.83536	6.79103	1.32902e-06	0.0233843	0.049891	1	Brain_Hippocampus
ENSG00000260911	AC135050.3	-5.01427	-0.205584	5.32353e-07	0.184352	8.68661e-09	4	Brain_Hippocampus
ENSG00000278133	AC135050.6	4.60506	0.677927	4.12353e-06	0.0369487	0.0133813	2	Brain_Hippocampus
ENSG00000170425	ADORA2B	4.99931	0.233247	5.75365e-07	0.0729083	0.000452474	9	Brain_Hippocampus
ENSG00000196118	CCDC189	5.55126	0.377187	2.83622e-08	0.155072	1.6687e-07	7	Brain_Hippocampus
ENSG00000120088	CRHR1	6.67723	0.836263	2.43501e-11	0.0564919	0.00211194	12	Brain_Hippocampus
ENSG00000145214	DGKQ	-5.46306	-0.754866	4.68004e-08	0.156482	1.45021e-07	1	Brain_Hippocampus
ENSG00000127415	IDUA	-6.76981	-1.94955	1.28949e-11	0.0459564	0.0056927	3	Brain_Hippocampus
ENSG00000080854	IGSF9B	-4.9557	-1.37587	7.20693e-07	0.0414598	0.00871181	1	Brain_Hippocampus
ENSG00000214401	KANSL1-AS1	-8.78635	-0.218071	1.54496e-18	0.597598	4.8419e-34	24	Brain_Hippocampus
ENSG00000103510	KAT8	-5.61885	-0.142721	1.92229e-08	0.211674	5.06473e-10	10	Brain_Hippocampus
ENSG00000230658	KLHL7-DT	-5.07143	-0.0865586	3.9483e-07	0.668511	6.30309e-41	11	Brain_Hippocampus
ENSG00000176681	LRRC37A	-5.97805	-0.503918	2.25825e-09	0.545917	9.57078e-30	15	Brain_Hippocampus
ENSG00000238083	LRRC37A2	-8.70092	-0.268888	3.29197e-18	0.617229	8.0888e-36	17	Brain_Hippocampus
ENSG00000264589	MAPT-AS1	7.03202	0.526432	2.03562e-12	0.136464	1.04518e-06	8	Brain_Hippocampus
ENSG00000279685	MAPT-IT1	-8.4935	-0.904831	2.00504e-17	0.0435454	0.00714982	9	Brain_Hippocampus
ENSG00000138722	MMRN1	7.92871	0.233161	2.21425e-15	0.270086	8.49623e-13	6	Brain_Hippocampus
ENSG00000141027	NCOR1	5.19718	0.459751	2.02336e-07	0.0564679	0.0021167	8	Brain_Hippocampus
ENSG00000164182	NDUFAF2	5.68632	0.617028	1.29808e-08	0.0662406	0.000846029	2	Brain_Hippocampus
ENSG00000136243	NUPL2	5.5044	0.151882	3.70418e-08	0.348355	7.2656e-17	10	Brain_Hippocampus
ENSG00000225190	PLEKHM1	-8.26672	-0.917877	1.37696e-16	0.105906	1.99771e-05	5	Brain_Hippocampus
ENSG00000117280	RAB29	6.19614	0.277439	5.7866e-10	0.13448	1.26872e-06	4	Brain_Hippocampus
ENSG00000103549	RNF40	-4.55939	-0.206785	5.13026e-06	0.063903	0.00105349	7	Brain_Hippocampus
ENSG00000103496	STX4	5.30707	1.6199	1.11401e-07	0.0380813	0.0120113	1	Brain_Hippocampus
ENSG00000127419	TMEM175	-6.12283	-0.91489	9.19306e-10	0.0611415	0.00136505	1	Brain_Hippocampus
ENSG00000011295	TTC19	-5.60406	-0.283558	2.09388e-08	0.111122	1.21324e-05	5	Brain_Hippocampus
ENSG00000167395	ZNF646	-5.30944	-0.454722	1.0996e-07	0.093508	6.49142e-05	4	Brain_Hippocampus
ENSG00000214941	ZSWIM7	5.23822	0.149777	1.62135e-07	0.117023	6.88543e-06	4	Brain_Hippocampus
ENSG00000226816	AC005082.1	-5.8358	-0.294083	5.35316e-09	0.149429	1.9213e-07	7	Brain_Hypothalamus
ENSG00000232748	AC135050.1	5.07799	0.326021	3.81451e-07	0.0274092	0.0309598	8	Brain_Hypothalamus
ENSG00000260911	AC135050.3	-5.04294	-0.205978	4.58429e-07	0.0827452	0.00014261	8	Brain_Hypothalamus
ENSG00000196118	CCDC189	5.51544	0.216423	3.47903e-08	0.13932	5.35519e-07	8	Brain_Hypothalamus
ENSG00000004468	CD38	-8.00219	-0.400104	1.22229e-15	0.0719161	0.000406659	7	Brain_Hypothalamus
ENSG00000214401	KANSL1-AS1	-9.05217	-0.225561	1.40152e-19	0.552353	3.92697e-31	11	Brain_Hypothalamus
ENSG00000103510	KAT8	-5.60859	-0.144385	2.03985e-08	0.22512	6.30538e-11	9	Brain_Hypothalamus
ENSG00000230658	KLHL7-DT	-5.08148	-0.087637	3.7451e-07	0.564206	4.07914e-32	8	Brain_Hypothalamus
ENSG00000176681	LRRC37A	-6.27108	-0.40065	3.58561e-10	0.64602	9.91622e-40	23	Brain_Hypothalamus
ENSG00000238083	LRRC37A2	-8.67661	-0.260027	4.0775e-18	0.676612	4.88678e-43	20	Brain_Hypothalamus
ENSG00000264589	MAPT-AS1	7.32062	0.461084	2.46828e-13	0.282767	8.55287e-14	9	Brain_Hypothalamus
ENSG00000279685	MAPT-IT1	-8.43306	-0.850081	3.36733e-17	0.0889224	7.82858e-05	9	Brain_Hypothalamus
ENSG00000138722	MMRN1	8.16046	0.241831	3.33754e-16	0.187483	3.69528e-09	11	Brain_Hypothalamus
ENSG00000141027	NCOR1	5.30628	0.780463	1.11885e-07	0.0307266	0.0222324	7	Brain_Hypothalamus
ENSG00000136243	NUPL2	5.51147	0.144197	3.55847e-08	0.325135	4.80461e-16	14	Brain_Hypothalamus
ENSG00000225190	PLEKHM1	-7.63016	-1.02856	2.34458e-14	0.103695	1.85025e-05	9	Brain_Hypothalamus
ENSG00000117280	RAB29	6.03197	0.187172	1.61969e-09	0.186616	4.05027e-09	9	Brain_Hypothalamus
ENSG00000138760	SCARB2	6.45119	0.588331	1.10975e-10	0.0327947	0.0181121	11	Brain_Hypothalamus
ENSG00000103496	STX4	5.55101	0.898805	2.84025e-08	0.196714	1.38333e-09	4	Brain_Hypothalamus
ENSG00000127419	TMEM175	-5.95421	-0.408021	2.61336e-09	0.028672	0.027283	5	Brain_Hypothalamus
ENSG00000011295	TTC19	-5.40645	-0.257085	6.42844e-08	0.0594816	0.00135066	6	Brain_Hypothalamus
ENSG00000214941	ZSWIM7	5.4208	0.291336	5.93337e-08	0.301391	9.0998e-15	13	Brain_Hypothalamus
ENSG00000227782	AC002553.1	5.40736	1.12572	6.39603e-08	0.0202091	0.0435729	1	Brain_Nucleus_accumbens_basal_ganglia
ENSG00000226816	AC005082.1	-5.54079	-0.236981	3.01114e-08	0.20201	1.94904e-11	4	Brain_Nucleus_accumbens_basal_ganglia
ENSG00000267198	AC091132.4	5.09607	0.276062	3.46769e-07	0.0692006	0.000155312	2	Brain_Nucleus_accumbens_basal_ganglia
ENSG00000260911	AC135050.3	-5.06539	-0.211119	4.07558e-07	0.0668861	0.000202124	7	Brain_Nucleus_accumbens_basal_ganglia
ENSG00000170425	ADORA2B	5.09447	0.156084	3.49723e-07	0.116062	7.00852e-07	4	Brain_Nucleus_accumbens_basal_ganglia
ENSG00000159314	ARHGAP27	-9.60666	-0.605709	7.49412e-22	0.256865	1.40207e-14	14	Brain_Nucleus_accumbens_basal_ganglia
ENSG00000185829	ARL17A	-7.78761	-0.350309	6.82866e-15	0.378843	1.89802e-22	14	Brain_Nucleus_accumbens_basal_ganglia
ENSG00000099385	BCL7C	-5.12932	-1.26838	2.90795e-07	0.0672443	0.00019405	7	Brain_Nucleus_accumbens_basal_ganglia
ENSG00000196118	CCDC189	5.38585	0.302402	7.21025e-08	0.334241	2.07205e-19	12	Brain_Nucleus_accumbens_basal_ganglia
ENSG00000004468	CD38	-7.4789	-0.250473	7.49483e-14	0.179572	3.29991e-10	19	Brain_Nucleus_accumbens_basal_ganglia
ENSG00000262372	CR936218.1	6.68067	6.53567	2.37847e-11	0.0254365	0.0233768	2	Brain_Nucleus_accumbens_basal_ganglia
ENSG00000120088	CRHR1	5.09625	0.308105	3.46449e-07	0.127012	1.93242e-07	15	Brain_Nucleus_accumbens_basal_ganglia
ENSG00000169242	EFNA1	5.16032	0.253992	2.46522e-07	0.0798245	4.6226e-05	9	Brain_Nucleus_accumbens_basal_ganglia
ENSG00000214401	KANSL1-AS1	-8.55644	-0.340929	1.16407e-17	0.598046	1.89979e-41	13	Brain_Nucleus_accumbens_basal_ganglia
ENSG00000103510	KAT8	-5.62219	-0.142255	1.88555e-08	0.252309	2.60584e-14	10	Brain_Nucleus_accumbens_basal_ganglia
ENSG00000230658	KLHL7-DT	-5.08116	-0.0876194	3.75143e-07	0.567165	3.19596e-38	8	Brain_Nucleus_accumbens_basal_ganglia
ENSG00000176681	LRRC37A	-6.3056	-0.469983	2.8708e-10	0.642156	1.64133e-46	20	Brain_Nucleus_accumbens_basal_ganglia
ENSG00000264589	MAPT-AS1	8.18407	0.384415	2.74411e-16	0.351509	1.46034e-20	11	Brain_Nucleus_accumbens_basal_ganglia
ENSG00000279685	MAPT-IT1	-8.54479	-0.926405	1.2877e-17	0.0517345	0.00113226	7	Brain_Nucleus_accumbens_basal_ganglia
ENSG00000243368	MCCC1-AS1	-5.35269	-0.522778	8.66575e-08	0.0622053	0.000344231	7	Brain_Nucleus_accumbens_basal_ganglia
ENSG00000138722	MMRN1	8.67149	0.238871	4.26506e-18	0.172751	7.69225e-10	13	Brain_Nucleus_accumbens_basal_ganglia
ENSG00000141027	NCOR1	5.039	4.92953	4.67959e-07	0.0494163	0.00147418	2	Brain_Nucleus_accumbens_basal_ganglia
ENSG00000164182	NDUFAF2	5.79165	0.619524	6.96975e-09	0.0283271	0.01665	2	Brain_Nucleus_accumbens_basal_ganglia
ENSG00000136243	NUPL2	5.25878	0.120965	1.45016e-07	0.297436	4.76253e-17	13	Brain_Nucleus_accumbens_basal_ganglia
ENSG00000225190	PLEKHM1	-7.3332	-0.417552	2.24725e-13	0.279554	6.05882e-16	12	Brain_Nucleus_accumbens_basal_ganglia
ENSG00000117280	RAB29	6.52415	0.2411	6.83904e-11	0.154514	7.17754e-09	13	Brain_Nucleus_accumbens_basal_ganglia
ENSG00000103549	RNF40	-5.66674	-0.296018	1.45538e-08	0.154774	6.95428e-09	7	Brain_Nucleus_accumbens_basal_ganglia
ENSG00000080603	SRCAP	-5.13818	-1.17544	2.77405e-07	0.0294476	0.0146085	2	Brain_Nucleus_accumbens_basal_ganglia
ENSG00000198648	STK39	-5.20101	-0.586956	1.98208e-07	0.0851189	2.52163e-05	8	Brain_Nucleus_accumbens_basal_ganglia
ENSG00000103496	STX4	5.44639	0.521551	5.14037e-08	0.183587	1.99928e-10	3	Brain_Nucleus_accumbens_basal_ganglia
ENSG00000127419	TMEM175	-5.57837	-0.300511	2.42786e-08	0.0467531	0.00199682	6	Brain_Nucleus_accumbens_basal_ganglia
ENSG00000011295	TTC19	-5.10563	-0.194836	3.29693e-07	0.135492	7.06379e-08	11	Brain_Nucleus_accumbens_basal_ganglia
ENSG00000167397	VKORC1	5.09669	0.387848	3.45646e-07	0.0305425	0.0128599	3	Brain_Nucleus_accumbens_basal_ganglia
ENSG00000167395	ZNF646	-5.12336	-0.818486	3.0014e-07	0.0314159	0.011619	2	Brain_Nucleus_accumbens_basal_ganglia
ENSG00000214941	ZSWIM7	5.05686	0.12946	4.26207e-07	0.350138	1.80705e-20	2	Brain_Nucleus_accumbens_basal_ganglia
ENSG00000227782	AC002553.1	5.39893	0.757462	6.70412e-08	0.0358281	0.013431	2	Brain_Putamen_basal_ganglia
ENSG00000226816	AC005082.1	-5.76327	-0.253805	8.24994e-09	0.186924	3.92036e-09	6	Brain_Putamen_basal_ganglia
ENSG00000170425	ADORA2B	5.09134	0.151743	3.55539e-07	0.0520054	0.00278117	5	Brain_Putamen_basal_ganglia
ENSG00000159314	ARHGAP27	-7.81501	-0.539649	5.49607e-15	0.078228	0.000220894	8	Brain_Putamen_basal_ganglia
ENSG00000185829	ARL17A	-7.18762	-0.31673	6.59324e-13	0.280291	1.14739e-13	20	Brain_Putamen_basal_ganglia
ENSG00000196118	CCDC189	5.59143	0.364108	2.25209e-08	0.0438102	0.00615648	7	Brain_Putamen_basal_ganglia
ENSG00000004468	CD38	-7.68745	-0.356138	1.50091e-14	0.157942	8.04295e-08	6	Brain_Putamen_basal_ganglia
ENSG00000120088	CRHR1	6.77868	0.613614	1.21281e-11	0.0751953	0.000296205	16	Brain_Putamen_basal_ganglia
ENSG00000214401	KANSL1-AS1	-8.27029	-0.346664	1.33639e-16	0.608355	4.98818e-36	13	Brain_Putamen_basal_ganglia
ENSG00000103510	KAT8	-5.60071	-0.145189	2.13475e-08	0.250113	3.81833e-12	9	Brain_Putamen_basal_ganglia
ENSG00000230658	KLHL7-DT	-5.16605	-0.0948269	2.39087e-07	0.499676	4.71961e-27	7	Brain_Putamen_basal_ganglia
ENSG00000078081	LAMP3	-5.59108	-0.769599	2.25661e-08	0.0340929	0.015933	8	Brain_Putamen_basal_ganglia
ENSG00000238083	LRRC37A2	-8.90419	-0.268027	5.37775e-19	0.590505	2.13873e-34	15	Brain_Putamen_basal_ganglia
ENSG00000264589	MAPT-AS1	5.79977	0.371163	6.64052e-09	0.155025	1.08485e-07	20	Brain_Putamen_basal_ganglia
ENSG00000279685	MAPT-IT1	-8.42459	-0.843183	3.62009e-17	0.0508587	0.0031075	9	Brain_Putamen_basal_ganglia
ENSG00000243368	MCCC1-AS1	-5.37429	-0.532602	7.68845e-08	0.0465369	0.00472376	6	Brain_Putamen_basal_ganglia
ENSG00000138722	MMRN1	8.49922	0.233602	1.90862e-17	0.301816	8.6403e-15	14	Brain_Putamen_basal_ganglia
ENSG00000141027	NCOR1	5.30781	0.800434	1.10952e-07	0.0230742	0.0479921	6	Brain_Putamen_basal_ganglia
ENSG00000164182	NDUFAF2	5.84878	0.686194	4.95178e-09	0.0622328	0.00103567	2	Brain_Putamen_basal_ganglia
ENSG00000136243	NUPL2	5.5981	0.163087	2.1671e-08	0.243198	8.36705e-12	13	Brain_Putamen_basal_ganglia
ENSG00000225190	PLEKHM1	-7.92064	-0.952288	2.36288e-15	0.271433	3.2558e-13	8	Brain_Putamen_basal_ganglia
ENSG00000138760	SCARB2	6.06339	0.502422	1.3328e-09	0.116191	5.40142e-06	13	Brain_Putamen_basal_ganglia
ENSG00000198648	STK39	-5.12949	-0.476338	2.90529e-07	0.0833798	0.000134099	8	Brain_Putamen_basal_ganglia
ENSG00000103496	STX4	5.5151	0.294838	3.4858e-08	0.0522179	0.00272459	8	Brain_Putamen_basal_ganglia
ENSG00000011295	TTC19	-5.51855	-0.226248	3.418e-08	0.214993	1.91824e-10	10	Brain_Putamen_basal_ganglia
ENSG00000167395	ZNF646	-5.69361	-0.529732	1.2438e-08	0.0741075	0.000329052	4	Brain_Putamen_basal_ganglia
ENSG00000226816	AC005082.1	-5.95524	-0.225905	2.59696e-09	0.162357	2.9007e-06	6	Brain_Spinal_cord_cervical_c-1
ENSG00000275263	AC135048.3	5.64229	4.59822	1.67799e-08	0.0347027	0.036749	1	Brain_Spinal_cord_cervical_c-1
ENSG00000260911	AC135050.3	-4.99019	-0.210933	6.03191e-07	0.313349	9.47816e-12	8	Brain_Spinal_cord_cervical_c-1
ENSG00000170425	ADORA2B	5.12979	0.176014	2.90069e-07	0.229373	1.40448e-08	6	Brain_Spinal_cord_cervical_c-1
ENSG00000163749	CCDC158	-4.94941	-0.394572	7.44391e-07	0.198984	1.65106e-07	2	Brain_Spinal_cord_cervical_c-1
ENSG00000120088	CRHR1	8.00309	2.1351	1.21332e-15	0.0852991	0.000905504	4	Brain_Spinal_cord_cervical_c-1
ENSG00000198171	DDRGK1	5.04644	1.57871	4.50112e-07	0.0351246	0.0356037	3	Brain_Spinal_cord_cervical_c-1
ENSG00000145214	DGKQ	-6.92698	-0.371962	4.29911e-12	0.170999	1.48906e-06	3	Brain_Spinal_cord_cervical_c-1
ENSG00000214401	KANSL1-AS1	-7.00106	-0.433316	2.54037e-12	0.546919	4.62927e-23	10	Brain_Spinal_cord_cervical_c-1
ENSG00000103510	KAT8	-5.56122	-0.151464	2.67896e-08	0.13613	2.12575e-05	7	Brain_Spinal_cord_cervical_c-1
ENSG00000230658	KLHL7-DT	-5.06599	-0.0867261	4.06277e-07	0.618307	1.05419e-27	8	Brain_Spinal_cord_cervical_c-1
ENSG00000176681	LRRC37A	-5.08755	-0.429369	3.62715e-07	0.426441	1.16615e-16	2	Brain_Spinal_cord_cervical_c-1
ENSG00000264589	MAPT-AS1	7.47458	0.386057	7.74526e-14	0.257053	1.37805e-09	9	Brain_Spinal_cord_cervical_c-1
ENSG00000243368	MCCC1-AS1	-5.41662	-0.561655	6.07352e-08	0.0319093	0.0453623	6	Brain_Spinal_cord_cervical_c-1
ENSG00000138722	MMRN1	8.37312	0.216206	5.61121e-17	0.155435	4.92913e-06	22	Brain_Spinal_cord_cervical_c-1
ENSG00000136243	NUPL2	5.94842	0.314212	2.70742e-09	0.431651	6.58411e-17	3	Brain_Spinal_cord_cervical_c-1
ENSG00000117280	RAB29	6.48767	0.239998	8.71752e-11	0.130659	3.20303e-05	12	Brain_Spinal_cord_cervical_c-1
ENSG00000127419	TMEM175	-6.12283	-0.736579	9.19306e-10	0.0771838	0.00163447	1	Brain_Spinal_cord_cervical_c-1
ENSG00000011295	TTC19	-5.14648	-0.38638	2.65413e-07	0.147137	9.26613e-06	2	Brain_Spinal_cord_cervical_c-1
ENSG00000167395	ZNF646	-5.2827	-0.4614	1.2729e-07	0.0410608	0.0228723	3	Brain_Spinal_cord_cervical_c-1
ENSG00000275413	AC002553.2	-5.02973	-0.394002	4.91181e-07	0.101808	0.000539907	7	Brain_Substantia_nigra
ENSG00000226816	AC005082.1	-5.99438	-0.223651	2.04264e-09	0.102534	0.000514409	6	Brain_Substantia_nigra
ENSG00000232748	AC135050.1	4.83536	0.708157	1.32902e-06	0.0552127	0.0118519	1	Brain_Substantia_nigra
ENSG00000260911	AC135050.3	-4.86678	-0.199562	1.13433e-06	0.190289	1.22518e-06	5	Brain_Substantia_nigra
ENSG00000170425	ADORA2B	5.17768	0.24698	2.24657e-07	0.129597	8.3512e-05	5	Brain_Substantia_nigra
ENSG00000163749	CCDC158	-4.5564	-0.306189	5.20388e-06	0.110154	0.000309245	3	Brain_Substantia_nigra
ENSG00000145214	DGKQ	-6.87738	-0.756786	6.09619e-12	0.0918388	0.0010475	2	Brain_Substantia_nigra
ENSG00000169242	EFNA1	4.53024	0.451571	5.89169e-06	0.103838	0.00047158	5	Brain_Substantia_nigra
ENSG00000189157	FAM47E	-4.60379	-0.314154	4.14876e-06	0.372821	5.47459e-13	4	Brain_Substantia_nigra
ENSG00000127415	IDUA	-5.43411	-6.40514	5.50706e-08	0.0523153	0.0143753	1	Brain_Substantia_nigra
ENSG00000214401	KANSL1-AS1	-9.06375	-0.228298	1.26045e-19	0.465421	6.40973e-17	12	Brain_Substantia_nigra
ENSG00000103510	KAT8	-5.54522	-0.145266	2.93586e-08	0.128751	8.84437e-05	7	Brain_Substantia_nigra
ENSG00000230658	KLHL7-DT	-5.10345	-0.0890473	3.33513e-07	0.586534	3.23735e-23	8	Brain_Substantia_nigra
ENSG00000176681	LRRC37A	-6.11114	-0.438854	9.89197e-10	0.449896	3.23708e-16	2	Brain_Substantia_nigra
ENSG00000264589	MAPT-AS1	7.40973	0.419763	1.26557e-13	0.177287	3.08858e-06	10	Brain_Substantia_nigra
ENSG00000279685	MAPT-IT1	-8.89685	-1.50619	5.74526e-19	0.0860082	0.00154174	4	Brain_Substantia_nigra
ENSG00000138722	MMRN1	8.14671	0.236225	3.73974e-16	0.25494	1.01238e-08	9	Brain_Substantia_nigra
ENSG00000164182	NDUFAF2	5.59964	1.53101	2.14798e-08	0.0420411	0.0286404	2	Brain_Substantia_nigra
ENSG00000136243	NUPL2	5.54709	0.155687	2.90458e-08	0.388957	1.2463e-13	15	Brain_Substantia_nigra
ENSG00000225190	PLEKHM1	-8.81545	-3.05473	1.19207e-18	0.0375276	0.038906	1	Brain_Substantia_nigra
ENSG00000117280	RAB29	5.97998	0.188877	2.23168e-09	0.172764	4.24839e-06	6	Brain_Substantia_nigra
ENSG00000152214	RIT2	4.8148	1.12094	1.47346e-06	0.0348901	0.0465986	3	Brain_Substantia_nigra
ENSG00000103549	RNF40	-4.65495	-0.222407	3.24066e-06	0.164184	7.74925e-06	7	Brain_Substantia_nigra
ENSG00000103496	STX4	5.61783	0.927558	1.93373e-08	0.0484155	0.0186553	3	Brain_Substantia_nigra
ENSG00000127419	TMEM175	-6.12283	-0.812929	9.19306e-10	0.0939655	0.000909594	1	Brain_Substantia_nigra
ENSG00000227782	AC002553.1	4.90472	1.45474	9.35619e-07	0.0140932	0.0343327	5	Colon_Sigmoid
ENSG00000226816	AC005082.1	-6.02425	-0.185294	1.69901e-09	0.230347	1.0016e-19	9	Colon_Sigmoid
ENSG00000267198	AC091132.4	5.05488	0.231782	4.30654e-07	0.179434	2.81007e-15	2	Colon_Sigmoid
ENSG00000272308	AC104113.1	4.81664	0.320533	1.45998e-06	0.0317573	0.00141815	11	Colon_Sigmoid
ENSG00000260911	AC135050.3	-5.20247	-0.201028	1.96657e-07	0.186037	7.70312e-16	6	Colon_Sigmoid
ENSG00000170425	ADORA2B	5.06685	0.135221	4.04461e-07	0.189583	3.82961e-16	5	Colon_Sigmoid
ENSG00000120088	CRHR1	-9.53465	-1.5283	1.50397e-21	0.0353507	0.000752396	7	Colon_Sigmoid
ENSG00000145214	DGKQ	-7.13952	-0.197814	9.36579e-13	0.281221	1.84468e-24	14	Colon_Sigmoid
ENSG00000080854	IGSF9B	-4.94325	-0.188175	7.68289e-07	0.17259	1.06363e-14	25	Colon_Sigmoid
ENSG00000214401	KANSL1-AS1	-8.59878	-0.231568	8.05672e-18	0.630123	3.19373e-70	35	Colon_Sigmoid
ENSG00000103510	KAT8	-5.61121	-0.142156	2.0092e-08	0.258065	2.88284e-22	9	Colon_Sigmoid
ENSG00000088899	LZTS3	-5.16169	-0.429515	2.44736e-07	0.0584971	1.29501e-05	9	Colon_Sigmoid
ENSG00000279685	MAPT-IT1	-9.16566	-1.95101	4.9244e-20	0.0166775	0.0212505	7	Colon_Sigmoid
ENSG00000243368	MCCC1-AS1	-4.94528	-0.453873	7.60333e-07	0.0260831	0.00388139	5	Colon_Sigmoid
ENSG00000156873	PHKG2	5.38063	1.52804	7.42248e-08	0.0231041	0.00661399	3	Colon_Sigmoid
ENSG00000225190	PLEKHM1	-8.34779	-1.02544	6.95533e-17	0.0457754	0.000120602	4	Colon_Sigmoid
ENSG00000156858	PRR14	4.88365	0.894131	1.04142e-06	0.0331618	0.00110667	4	Colon_Sigmoid
ENSG00000151006	PRSS53	5.02842	0.423088	4.94546e-07	0.0569062	1.71231e-05	9	Colon_Sigmoid
ENSG00000117280	RAB29	5.80349	0.135004	6.495e-09	0.308003	4.3742e-27	17	Colon_Sigmoid
ENSG00000099365	STX1B	-5.4429	-0.500155	5.24193e-08	0.0231323	0.00658068	3	Colon_Sigmoid
ENSG00000127419	TMEM175	-5.53077	-0.618503	3.18825e-08	0.0668863	2.9609e-06	3	Colon_Sigmoid
ENSG00000108379	WNT3	-8.49997	-0.366483	1.89643e-17	0.184779	9.86469e-16	9	Colon_Sigmoid
ENSG00000167395	ZNF646	-5.33437	-0.446124	9.5879e-08	0.0170643	0.0197908	7	Colon_Sigmoid
ENSG00000167394	ZNF668	5.67363	2.80439	1.39799e-08	0.0183248	0.0157094	2	Colon_Sigmoid
ENSG00000226816	AC005082.1	-5.9449	-0.18151	2.76629e-09	0.172494	8.87515e-17	7	Colon_Transverse
ENSG00000267198	AC091132.4	5.03132	0.228966	4.87115e-07	0.202447	9.64286e-20	2	Colon_Transverse
ENSG00000232748	AC135050.1	4.96093	0.60272	7.01579e-07	0.0280698	0.00125586	5	Colon_Transverse
ENSG00000260911	AC135050.3	-5.07941	-0.169727	3.78616e-07	0.21264	8.94418e-21	12	Colon_Transverse
ENSG00000170425	ADORA2B	5.07977	0.143972	3.77898e-07	0.068176	3.76993e-07	7	Colon_Transverse
ENSG00000145214	DGKQ	-6.79412	-0.195958	1.08973e-11	0.159067	1.75574e-15	21	Colon_Transverse
ENSG00000080854	IGSF9B	-4.94902	-0.236085	7.45885e-07	0.127015	1.83848e-12	15	Colon_Transverse
ENSG00000214401	KANSL1-AS1	-8.59725	-0.239416	8.16504e-18	0.642342	1.00006e-83	31	Colon_Transverse
ENSG00000103510	KAT8	-5.68868	-0.133514	1.28024e-08	0.341275	4.72086e-35	15	Colon_Transverse
ENSG00000230658	KLHL7-DT	-5.05221	-0.0861981	4.36729e-07	0.522038	1.22736e-60	11	Colon_Transverse
ENSG00000176681	LRRC37A	-6.26666	-0.293283	3.68871e-10	0.471087	1.4501e-52	41	Colon_Transverse
ENSG00000238083	LRRC37A2	-7.40248	-0.266344	1.3366e-13	0.497307	1.28493e-56	25	Colon_Transverse
ENSG00000088899	LZTS3	-5.19595	-0.39732	2.03672e-07	0.0636262	9.49261e-07	15	Colon_Transverse
ENSG00000243368	MCCC1-AS1	-5.07732	-0.49823	3.82795e-07	0.0238152	0.00299612	4	Colon_Transverse
ENSG00000138722	MMRN1	7.66932	0.582853	1.72914e-14	0.0226414	0.00381342	7	Colon_Transverse
ENSG00000136243	NUPL2	5.23506	0.189907	1.64927e-07	0.174519	5.63576e-17	14	Colon_Transverse
ENSG00000225190	PLEKHM1	-8.30517	-1.09464	9.96786e-17	0.0392162	0.000131355	3	Colon_Transverse
ENSG00000151006	PRSS53	4.98194	0.495666	6.29509e-07	0.0222127	0.00416535	10	Colon_Transverse
ENSG00000117280	RAB29	5.82071	0.145527	5.85989e-09	0.354587	1.1045e-36	19	Colon_Transverse
ENSG00000011295	TTC19	-4.75754	-0.155582	1.95967e-06	0.212934	8.34697e-21	21	Colon_Transverse
ENSG00000108379	WNT3	-9.1066	-0.43806	8.50051e-20	0.177168	3.1071e-17	10	Colon_Transverse
ENSG00000167395	ZNF646	-5.22505	-0.44318	1.74106e-07	0.0659718	5.89865e-07	7	Colon_Transverse
ENSG00000167394	ZNF668	5.25012	1.98458	1.51999e-07	0.0580027	2.96381e-06	1	Colon_Transverse
ENSG00000214941	ZSWIM7	-5.07178	-8.32808	3.94104e-07	0.0944066	1.73988e-09	1	Colon_Transverse
ENSG00000226816	AC005082.1	-5.97508	-0.201987	2.29974e-09	0.100711	3.00307e-06	5	Liver
ENSG00000267198	AC091132.4	5.12612	0.261723	2.95778e-07	0.148451	9.09936e-09	2	Liver
ENSG00000232748	AC135050.1	5.17094	0.178633	2.32914e-07	0.159598	2.26334e-09	15	Liver
ENSG00000170425	ADORA2B	5.07325	0.141578	3.91081e-07	0.27011	8.68524e-16	7	Liver
ENSG00000099385	BCL7C	-4.99142	-3.53309	5.99377e-07	0.0449255	0.00211598	2	Liver
ENSG00000262881	CR936218.2	9.36324	0.266749	7.73314e-21	0.455667	5.0908e-29	9	Liver
ENSG00000145214	DGKQ	-7.15577	-0.205758	8.3206e-13	0.169699	6.32758e-10	14	Liver
ENSG00000136235	GPNMB	4.99877	1.96094	5.7697e-07	0.0843588	2.08367e-05	5	Liver
ENSG00000214401	KANSL1-AS1	-8.73215	-0.295752	2.49887e-18	0.667718	3.51794e-51	11	Liver
ENSG00000103510	KAT8	-5.65299	-0.137201	1.57681e-08	0.190491	4.39425e-11	14	Liver
ENSG00000230658	KLHL7-DT	-5.04069	-0.0864257	4.63853e-07	0.444643	4.06282e-28	8	Liver
ENSG00000156928	MALSU1	5.39962	1.81611	6.67806e-08	0.0490631	0.00130296	1	Liver
ENSG00000279685	MAPT-IT1	8.69636	0.339149	3.42705e-18	0.204257	7.26473e-12	11	Liver
ENSG00000138722	MMRN1	7.48818	0.520328	6.98349e-14	0.1707	5.57223e-10	12	Liver
ENSG00000141027	NCOR1	5.29569	1.06027	1.18569e-07	0.0321754	0.00952942	4	Liver
ENSG00000136243	NUPL2	5.11375	0.170373	3.15829e-07	0.043112	0.00261794	13	Liver
ENSG00000178226	PRSS36	-4.79604	-0.331021	1.61829e-06	0.037392	0.00513439	6	Liver
ENSG00000151006	PRSS53	-5.0142	-0.104558	5.32544e-07	0.419096	4.29787e-26	12	Liver
ENSG00000117280	RAB29	5.84177	0.150868	5.16498e-09	0.214789	1.79787e-12	10	Liver
ENSG00000099381	SETD1A	-5.60762	-1.1874	2.05127e-08	0.0235688	0.0268348	5	Liver
ENSG00000099365	STX1B	-5.32305	-0.536218	1.02041e-07	0.0446338	0.00218963	4	Liver
ENSG00000152128	TMEM163	5.03122	0.704412	4.87363e-07	0.102704	2.36812e-06	19	Liver
ENSG00000011295	TTC19	-5.03098	-0.186984	4.87988e-07	0.172622	4.36473e-10	8	Liver
ENSG00000167397	VKORC1	-5.28125	-0.0977994	1.28306e-07	0.520342	1.04813e-34	7	Liver
ENSG00000167395	ZNF646	-5.22638	-0.160158	1.72864e-07	0.186703	7.17663e-11	11	Liver
ENSG00000226816	AC005082.1	-6.00235	-0.204428	1.94485e-09	0.0870935	1.51924e-07	5	Pancreas
ENSG00000267198	AC091132.4	4.61092	0.192435	4.00895e-06	0.200121	2.05544e-16	19	Pancreas
ENSG00000232748	AC135050.1	4.98303	0.525491	6.25969e-07	0.0525317	5.33955e-05	6	Pancreas
ENSG00000170425	ADORA2B	5.03095	0.135948	4.88063e-07	0.273369	8.46833e-23	5	Pancreas
ENSG00000099385	BCL7C	-5.09088	-1.99804	3.56413e-07	0.0291511	0.00277568	3	Pancreas
ENSG00000196118	CCDC189	5.61017	0.429811	2.02124e-08	0.0745071	1.30048e-06	7	Pancreas
ENSG00000262372	CR936218.1	8.70341	3.18573	3.22047e-18	0.0150468	0.032229	5	Pancreas
ENSG00000145214	DGKQ	-7.09952	-0.208513	1.25189e-12	0.354009	1.35867e-30	14	Pancreas
ENSG00000189157	FAM47E	-5.26771	-0.132439	1.38136e-07	0.558839	8.76112e-56	12	Pancreas
ENSG00000080854	IGSF9B	-4.63259	-0.194978	3.61119e-06	0.262818	7.66868e-22	11	Pancreas
ENSG00000120071	KANSL1	4.9426	0.321156	7.70862e-07	0.119262	5.71393e-10	6	Pancreas
ENSG00000214401	KANSL1-AS1	-8.69648	-0.301055	3.42353e-18	0.492137	1.71388e-46	11	Pancreas
ENSG00000103510	KAT8	-5.66086	-0.136525	1.50619e-08	0.212471	1.89007e-17	14	Pancreas
ENSG00000122550	KLHL7	-4.68661	-0.228652	2.77764e-06	0.0729084	1.70618e-06	8	Pancreas
ENSG00000230658	KLHL7-DT	-5.07795	-0.085194	3.81522e-07	0.577989	1.03616e-58	14	Pancreas
ENSG00000176681	LRRC37A	5.15838	0.576474	2.491e-07	0.408681	1.92363e-36	2	Pancreas
ENSG00000238083	LRRC37A2	-7.63514	-0.297271	2.25569e-14	0.427262	1.49272e-38	23	Pancreas
ENSG00000136243	NUPL2	5.677	0.209312	1.37077e-08	0.0483793	0.000107471	12	Pancreas
ENSG00000156873	PHKG2	5.10471	1.8995	3.31299e-07	0.0449043	0.000192996	1	Pancreas
ENSG00000225190	PLEKHM1	-7.78054	-0.844535	7.22157e-15	0.0134878	0.0426846	4	Pancreas
ENSG00000117280	RAB29	5.96962	0.161321	2.37808e-09	0.199003	2.54639e-16	16	Pancreas
ENSG00000099365	STX1B	-5.61367	-0.303188	1.98083e-08	0.223735	2.07808e-18	13	Pancreas
ENSG00000127419	TMEM175	-5.92081	-0.500366	3.20365e-09	0.0200741	0.0132591	3	Pancreas
ENSG00000011295	TTC19	-5.03456	-0.169302	4.78941e-07	0.25965	1.47717e-21	14	Pancreas
ENSG00000108379	WNT3	-8.54497	-0.265967	1.28572e-17	0.258657	1.81316e-21	10	Pancreas
ENSG00000167395	ZNF646	-5.04051	-0.597458	4.64298e-07	0.0149886	0.0325674	3	Pancreas
ENSG00000167394	ZNF668	5.25012	27.8692	1.51999e-07	0.0406862	0.000393031	1	Pancreas
ENSG00000226816	AC005082.1	-5.9504	-0.214443	2.67481e-09	0.192382	1.4561e-12	7	Pituitary
ENSG00000131484	AC091132.1	5.90571	0.322517	3.51134e-09	0.225391	1.00138e-14	5	Pituitary
ENSG00000267198	AC091132.4	5.02828	0.251228	4.94891e-07	0.2749	3.87643e-18	3	Pituitary
ENSG00000232748	AC135050.1	5.08361	0.570695	3.7033e-07	0.0710805	3.20751e-05	6	Pituitary
ENSG00000260911	AC135050.3	-4.88179	-0.211914	1.05125e-06	0.220427	2.14416e-14	8	Pituitary
ENSG00000170425	ADORA2B	5.03102	0.161387	4.87887e-07	0.235535	2.08303e-15	9	Pituitary
ENSG00000185829	ARL17A	-7.98334	-0.270609	1.42422e-15	0.562169	4.93317e-44	27	Pituitary
ENSG00000196118	CCDC189	5.46015	0.200018	4.75739e-08	0.407566	1.56119e-28	10	Pituitary
ENSG00000198171	DDRGK1	4.98947	0.793488	6.05436e-07	0.0280834	0.00975094	5	Pituitary
ENSG00000145214	DGKQ	-7.14633	-0.235694	8.91265e-13	0.18171	6.99751e-12	15	Pituitary
ENSG00000127415	IDUA	-5.86058	-0.488185	4.61259e-09	0.0902604	2.47807e-06	9	Pituitary
ENSG00000080854	IGSF9B	-5.17485	-0.337904	2.281e-07	0.320641	1.70148e-21	7	Pituitary
ENSG00000214401	KANSL1-AS1	-8.81837	-0.221611	1.1614e-18	0.67463	3.19758e-59	26	Pituitary
ENSG00000103510	KAT8	-5.57139	-0.158669	2.52715e-08	0.341635	4.126e-23	8	Pituitary
ENSG00000230658	KLHL7-DT	-5.10199	-0.0862815	3.36105e-07	0.616595	7.93619e-51	13	Pituitary
ENSG00000176681	LRRC37A	-7.59438	-0.354875	3.09269e-14	0.674293	3.61265e-59	2	Pituitary
ENSG00000264589	MAPT-AS1	6.14805	0.459645	7.84399e-10	0.0168336	0.0460137	11	Pituitary
ENSG00000279685	MAPT-IT1	-7.57921	-0.570134	3.4766e-14	0.114563	9.21044e-08	11	Pituitary
ENSG00000243368	MCCC1-AS1	-5.28683	-0.47184	1.24455e-07	0.0732946	2.38979e-05	8	Pituitary
ENSG00000138722	MMRN1	7.91924	0.239211	2.38975e-15	0.221667	1.77339e-14	13	Pituitary
ENSG00000141027	NCOR1	4.81097	0.541534	1.502e-06	0.0368728	0.00299554	1	Pituitary
ENSG00000136243	NUPL2	5.62666	0.15779	1.83735e-08	0.244911	4.79477e-16	12	Pituitary
ENSG00000225190	PLEKHM1	-7.82814	-1.26514	4.95145e-15	0.0758392	1.7034e-05	7	Pituitary
ENSG00000156858	PRR14	4.78749	0.705123	1.68882e-06	0.0414232	0.00163426	6	Pituitary
ENSG00000117280	RAB29	5.81791	0.251339	5.95878e-09	0.187025	3.2093e-12	7	Pituitary
ENSG00000127419	TMEM175	-5.49427	-0.39088	3.92326e-08	0.115753	7.8261e-08	3	Pituitary
ENSG00000011295	TTC19	-5.19766	-0.212036	2.0181e-07	0.152502	4.68781e-10	8	Pituitary
ENSG00000167397	VKORC1	4.95352	0.396545	7.28832e-07	0.0659257	6.35779e-05	5	Pituitary
ENSG00000108379	WNT3	-8.2258	-0.239129	1.93893e-16	0.274369	4.22846e-18	14	Pituitary
ENSG00000167395	ZNF646	-5.56519	-0.365358	2.61869e-08	0.0295246	0.00802523	8	Pituitary
ENSG00000214941	ZSWIM7	-4.89863	-0.985719	9.65095e-07	0.186933	3.25313e-12	1	Pituitary
ENSG00000226816	AC005082.1	-6.02686	-0.19895	1.67179e-09	0.215122	1.15211e-10	7	Small_Intestine_Terminal_Ileum
ENSG00000131484	AC091132.1	5.6449	0.282861	1.65279e-08	0.134476	6.46279e-07	6	Small_Intestine_Terminal_Ileum
ENSG00000267198	AC091132.4	5.0237	0.237135	5.06854e-07	0.150892	1.18023e-07	3	Small_Intestine_Terminal_Ileum
ENSG00000261346	AC116348.3	-4.78435	-0.290336	1.71542e-06	0.0434567	0.00577335	4	Small_Intestine_Terminal_Ileum
ENSG00000260911	AC135050.3	-5.02291	-0.182714	5.08945e-07	0.264628	3.84748e-13	11	Small_Intestine_Terminal_Ileum
ENSG00000170425	ADORA2B	5.06882	0.171271	4.00299e-07	0.113799	5.31604e-06	2	Small_Intestine_Terminal_Ileum
ENSG00000163749	CCDC158	-4.86614	-0.274817	1.13798e-06	0.051208	0.00267749	5	Small_Intestine_Terminal_Ileum
ENSG00000262372	CR936218.1	7.52363	1.25471	5.32758e-14	0.0234492	0.0436649	6	Small_Intestine_Terminal_Ileum
ENSG00000145214	DGKQ	-6.83297	-0.246913	8.31765e-12	0.186109	2.79944e-09	8	Small_Intestine_Terminal_Ileum
ENSG00000232300	FAM215B	-7.18927	-0.807138	6.51393e-13	0.0325956	0.0171267	3	Small_Intestine_Terminal_Ileum
ENSG00000127415	IDUA	-7.88925	-1.29901	3.0401e-15	0.130231	9.99091e-07	3	Small_Intestine_Terminal_Ileum
ENSG00000080854	IGSF9B	-5.11127	-0.464495	3.19995e-07	0.0426895	0.00623112	3	Small_Intestine_Terminal_Ileum
ENSG00000214401	KANSL1-AS1	-8.81936	-0.297622	1.15119e-18	0.569897	2.46026e-33	11	Small_Intestine_Terminal_Ileum
ENSG00000103510	KAT8	-5.53001	-0.162991	3.20216e-08	0.188982	2.05043e-09	7	Small_Intestine_Terminal_Ileum
ENSG00000230658	KLHL7-DT	-5.0729	-0.0850993	3.918e-07	0.526736	9.53689e-30	16	Small_Intestine_Terminal_Ileum
ENSG00000136243	NUPL2	5.64359	0.206951	1.66539e-08	0.148018	1.59236e-07	9	Small_Intestine_Terminal_Ileum
ENSG00000151006	PRSS53	-4.70629	-0.386406	2.5226e-06	0.117621	3.6107e-06	2	Small_Intestine_Terminal_Ileum
ENSG00000117280	RAB29	5.9162	0.15576	3.29472e-09	0.229091	2.38666e-11	10	Small_Intestine_Terminal_Ileum
ENSG00000099381	SETD1A	-5.32308	-2.04425	1.02026e-07	0.0400377	0.00811548	3	Small_Intestine_Terminal_Ileum
ENSG00000099365	STX1B	-5.17787	-0.793773	2.24438e-07	0.106066	1.15891e-05	3	Small_Intestine_Terminal_Ileum
ENSG00000127419	TMEM175	-6.12283	-1.0252	9.19306e-10	0.0394536	0.00860277	1	Small_Intestine_Terminal_Ileum
ENSG00000011295	TTC19	-4.95522	-0.146839	7.225e-07	0.279702	6.30994e-14	15	Small_Intestine_Terminal_Ileum
ENSG00000167397	VKORC1	-4.72055	-0.193139	2.35211e-06	0.18766	2.3665e-09	3	Small_Intestine_Terminal_Ileum
ENSG00000108379	WNT3	-8.45199	-0.404207	2.86369e-17	0.0999378	2.14274e-05	6	Small_Intestine_Terminal_Ileum
ENSG00000167395	ZNF646	-4.91796	-0.245732	8.74488e-07	0.0979194	2.62209e-05	11	Small_Intestine_Terminal_Ileum
ENSG00000167394	ZNF668	5.39421	0.316563	6.88255e-08	0.055838	0.0016945	13	Small_Intestine_Terminal_Ileum
ENSG00000214941	ZSWIM7	-5.02878	-0.120213	4.93617e-07	0.314321	8.62903e-16	6	Small_Intestine_Terminal_Ileum
ENSG00000226816	AC005082.1	-4.97201	-0.131293	6.62609e-07	0.3003	3.42637e-19	9	Spleen
ENSG00000131484	AC091132.1	4.95774	0.240658	7.13185e-07	0.234923	8.92761e-15	23	Spleen
ENSG00000267198	AC091132.4	5.01066	0.213339	5.42427e-07	0.268464	5.39983e-17	2	Spleen
ENSG00000272308	AC104113.1	5.03825	0.433732	4.69797e-07	0.0447602	0.00134435	1	Spleen
ENSG00000232748	AC135050.1	4.93966	0.682476	7.82604e-07	0.0342125	0.00518073	3	Spleen
ENSG00000260911	AC135050.3	-5.25716	-0.139021	1.46294e-07	0.26701	6.7687e-17	26	Spleen
ENSG00000170425	ADORA2B	5.07815	0.140181	3.81135e-07	0.40469	3.78141e-27	7	Spleen
ENSG00000262372	CR936218.1	8.93169	9.58883	4.19567e-19	0.017056	0.0493878	1	Spleen
ENSG00000145214	DGKQ	-6.94121	-0.153289	3.88754e-12	0.607755	1.28095e-47	23	Spleen
ENSG00000049167	ERCC8	5.24321	0.283138	1.57809e-07	0.0865493	6.53943e-06	5	Spleen
ENSG00000189157	FAM47E	-5.43512	-0.219444	5.47583e-08	0.353972	3.98808e-23	13	Spleen
ENSG00000177628	GBA	5.68781	0.364957	1.28682e-08	0.108994	3.57904e-07	18	Spleen
ENSG00000127415	IDUA	-4.74103	-0.268959	2.12638e-06	0.235126	8.66058e-15	14	Spleen
ENSG00000080854	IGSF9B	-4.80358	-0.238406	1.55853e-06	0.215084	1.65937e-13	9	Spleen
ENSG00000214401	KANSL1-AS1	-8.66676	-0.293471	4.44581e-18	0.517859	1.67323e-37	11	Spleen
ENSG00000103510	KAT8	-5.60347	-0.144529	2.10105e-08	0.158106	5.10176e-10	9	Spleen
ENSG00000230658	KLHL7-DT	-4.99552	-0.0847575	5.86769e-07	0.628548	2.7488e-50	10	Spleen
ENSG00000238083	LRRC37A2	-6.6348	-0.291527	3.24946e-11	0.487414	1.6912e-34	21	Spleen
ENSG00000186868	MAPT	-9.76754	-0.503205	1.55171e-22	0.0829377	1.03943e-05	7	Spleen
ENSG00000141027	NCOR1	5.17042	0.862687	2.33572e-07	0.039203	0.00273202	5	Spleen
ENSG00000073969	NSF	5.1491	1.01388	2.61741e-07	0.0210102	0.0290089	5	Spleen
ENSG00000136243	NUPL2	5.54808	0.208693	2.88819e-08	0.361777	1.00524e-23	13	Spleen
ENSG00000225190	PLEKHM1	-8.35101	-0.558902	6.76845e-17	0.0860328	6.98794e-06	10	Spleen
ENSG00000151006	PRSS53	4.88772	0.418658	1.02012e-06	0.0703404	5.19779e-05	13	Spleen
ENSG00000117280	RAB29	5.73569	0.141403	9.71156e-09	0.15196	1.1782e-09	16	Spleen
ENSG00000099381	SETD1A	-5.35078	-0.885563	8.7578e-08	0.055554	0.000340768	3	Spleen
ENSG00000145335	SNCA	5.58887	0.401713	2.28548e-08	0.0396622	0.00257623	5	Spleen
ENSG00000103496	STX4	-5.31761	-1.13942	1.0514e-07	0.16159	3.16652e-10	3	Spleen
ENSG00000127419	TMEM175	-4.9521	-0.458004	7.34155e-07	0.0497361	0.000713737	5	Spleen
ENSG00000167397	VKORC1	4.82188	0.245154	1.42213e-06	0.0924168	3.07332e-06	5	Spleen
ENSG00000108379	WNT3	-8.65107	-0.399535	5.10171e-18	0.112054	2.39943e-07	6	Spleen
ENSG00000167395	ZNF646	-4.68323	-0.299587	2.82395e-06	0.110357	2.99553e-07	8	Spleen
ENSG00000167394	ZNF668	5.28605	0.415132	1.24989e-07	0.0411085	0.00214163	4	Spleen
ENSG00000214941	ZSWIM7	-5.29908	-0.124678	1.16385e-07	0.51671	2.18951e-37	13	Spleen
ENSG00000226816	AC005082.1	-5.81401	-0.196302	6.09927e-09	0.119962	1.45742e-10	4	Stomach
ENSG00000267198	AC091132.4	5.02744	0.222019	4.97082e-07	0.138065	4.79783e-12	2	Stomach
ENSG00000232748	AC135050.1	4.89542	0.689747	9.80982e-07	0.0190603	0.0128688	3	Stomach
ENSG00000260911	AC135050.3	-5.00455	-0.154833	5.59922e-07	0.181805	9.5939e-16	13	Stomach
ENSG00000170425	ADORA2B	5.06312	0.138464	4.12459e-07	0.395821	4.11722e-37	9	Stomach
ENSG00000196118	CCDC189	5.61917	0.480942	1.91879e-08	0.0219184	0.0076009	6	Stomach
ENSG00000138769	CDKL2	5.88752	0.820589	3.92045e-09	0.0120226	0.0486116	6	Stomach
ENSG00000262372	CR936218.1	9.19159	3.66297	3.87062e-20	0.0393978	0.000324616	3	Stomach
ENSG00000145214	DGKQ	-6.03541	-0.143515	1.58556e-09	0.477424	2.68456e-47	11	Stomach
ENSG00000143590	EFNA3	5.28158	1.46703	1.28075e-07	0.0133445	0.0376857	6	Stomach
ENSG00000127415	IDUA	-7.57841	-0.675675	3.49803e-14	0.189243	2.16289e-16	5	Stomach
ENSG00000080854	IGSF9B	-4.76575	-0.231294	1.88154e-06	0.0650298	3.327e-06	12	Stomach
ENSG00000214401	KANSL1-AS1	-7.68813	-0.339157	1.49299e-14	0.602442	1.82091e-66	12	Stomach
ENSG00000103510	KAT8	-5.64505	-0.137458	1.65134e-08	0.292169	5.62827e-26	10	Stomach
ENSG00000122550	KLHL7	-5.72691	-0.463177	1.02274e-08	0.0369558	0.000502471	5	Stomach
ENSG00000230658	KLHL7-DT	-5.04625	-0.0853944	4.50565e-07	0.482859	4.95964e-48	10	Stomach
ENSG00000238083	LRRC37A2	-7.43219	-0.286975	1.06816e-13	0.515971	1.13337e-52	20	Stomach
ENSG00000088899	LZTS3	-5.20594	-0.436272	1.93012e-07	0.0328281	0.00105331	14	Stomach
ENSG00000243368	MCCC1-AS1	-4.94643	-0.319642	7.55885e-07	0.0469297	8.45585e-05	13	Stomach
ENSG00000138722	MMRN1	7.67976	0.572401	1.5939e-14	0.060042	8.1281e-06	7	Stomach
ENSG00000073969	NSF	5.05016	0.772676	4.41446e-07	0.0433652	0.000159777	7	Stomach
ENSG00000136243	NUPL2	5.57553	0.213045	2.46782e-08	0.128353	3.0175e-11	12	Stomach
ENSG00000156873	PHKG2	4.77184	0.445525	1.82552e-06	0.0534797	2.62641e-05	4	Stomach
ENSG00000225190	PLEKHM1	-8.3362	-1.05915	7.67132e-17	0.0320032	0.00122164	3	Stomach
ENSG00000156858	PRR14	4.85768	0.878202	1.18769e-06	0.018859	0.0133579	4	Stomach
ENSG00000117280	RAB29	5.74422	0.138943	9.23444e-09	0.316013	2.17628e-28	19	Stomach
ENSG00000099365	STX1B	-5.61467	-0.399725	1.96938e-08	0.134139	1.01115e-11	6	Stomach
ENSG00000011295	TTC19	-5.11575	-0.457043	3.125e-07	0.207341	5.46039e-18	1	Stomach
ENSG00000108379	WNT3	-8.66674	-0.4062	4.44665e-18	0.14381	1.60313e-12	8	Stomach
ENSG00000167395	ZNF646	-5.31441	-0.417182	1.07005e-07	0.0462033	9.62652e-05	10	Stomach
ENSG00000167394	ZNF668	5.71048	2.51681	1.1266e-08	0.0275786	0.00271296	2	Stomach
ENSG00000226816	AC005082.1	-5.47243	-0.152324	4.43894e-08	0.265549	1.01671e-46	10	Whole_Blood
ENSG00000225342	AC079630.1	-5.39027	-0.639542	7.03514e-08	0.0491463	6.63547e-09	9	Whole_Blood
ENSG00000232748	AC135050.1	4.88525	0.590546	1.033e-06	0.0197604	0.000262288	6	Whole_Blood
ENSG00000260911	AC135050.3	-5.05252	-0.177456	4.36026e-07	0.187263	5.93842e-32	13	Whole_Blood
ENSG00000109743	BST1	-4.80163	-0.227847	1.5738e-06	0.0606055	1.04674e-10	29	Whole_Blood
ENSG00000224043	CCNT2-AS1	4.8244	0.486687	1.40423e-06	0.0147041	0.00166372	6	Whole_Blood
ENSG00000145214	DGKQ	-6.18971	-0.123986	6.02732e-10	0.627778	1.73008e-145	25	Whole_Blood
ENSG00000136235	GPNMB	5.74068	0.85195	9.42946e-09	0.0541513	1.08733e-09	7	Whole_Blood
ENSG00000099377	HSD3B7	4.90666	0.27429	9.2642e-07	0.0692604	4.46115e-12	3	Whole_Blood
ENSG00000080854	IGSF9B	-5.05941	-0.246097	4.20558e-07	0.100727	3.8196e-17	16	Whole_Blood
ENSG00000214401	KANSL1-AS1	-8.21688	-0.313695	2.08869e-16	0.655289	1.23253e-156	11	Whole_Blood
ENSG00000103510	KAT8	-5.43196	-0.204219	5.57381e-08	0.0433655	5.32985e-08	5	Whole_Blood
ENSG00000122550	KLHL7	-4.61656	-0.325187	3.90155e-06	0.0374263	4.51268e-07	12	Whole_Blood
ENSG00000156928	MALSU1	4.78335	0.430794	1.72397e-06	0.0198719	0.000251882	6	Whole_Blood
ENSG00000136243	NUPL2	5.64323	0.252954	1.66888e-08	0.069935	3.48543e-12	8	Whole_Blood
ENSG00000225190	PLEKHM1	5.30487	0.463185	1.12756e-07	0.0421316	8.30942e-08	28	Whole_Blood
ENSG00000151006	PRSS53	5.5034	0.435665	3.72546e-08	0.0450219	2.93543e-08	4	Whole_Blood
ENSG00000117280	RAB29	4.82117	0.138706	1.42721e-06	0.287594	3.71067e-51	11	Whole_Blood
ENSG00000138760	SCARB2	5.95594	0.239312	2.58574e-09	0.0979118	1.09993e-16	19	Whole_Blood
ENSG00000099381	SETD1A	-6.44771	-0.906677	1.13549e-10	0.010315	0.00851872	5	Whole_Blood
ENSG00000145335	SNCA	-7.53571	-0.621824	4.85695e-14	0.0375126	4.37493e-07	3	Whole_Blood
ENSG00000011295	TTC19	-5.11575	-0.374157	3.125e-07	0.171984	3.11584e-29	1	Whole_Blood
ENSG00000167397	VKORC1	5.59348	0.296745	2.22559e-08	0.0490314	6.91643e-09	11	Whole_Blood
ENSG00000108379	WNT3	-8.09486	-0.407277	5.73298e-16	0.0196714	0.000270902	10	Whole_Blood
ENSG00000167394	ZNF668	5.57664	0.731032	2.45204e-08	0.115178	1.59869e-19	4	Whole_Blood
ENSG00000214941	ZSWIM7	4.70483	0.287731	2.54081e-06	0.078956	1.26789e-13	20	Whole_Blood
