# Supplementary material for: Joint analysis of proteome, transcriptome, and multi-trait analysis to identify novel Parkinson’s disease risk genes
Source: Aging (Albany NY). 2024 Jan 17;16(2):1555–80. doi: 10.18632/aging.205444 (PMC10866412; doi:10.18632/aging.205444)
Supplement: Supplementary Table 12 [file aging-16-205444-s011.xlsx]

## Sheet: Sheet1
Supplementary Table 12. Twenty-eight expression-trait associations for genes identified in the present and previous TWAS (PD GWAS).
Region	Gene name	Type	The present study						Previous TWAS
			Model	Z score	effect size	P-value	R2	Number of SNPs in models	Model	Z score	P-value	References (PMID)
1q32.1	RAB29	protein	Brain_Amygdala	6.20889	0.227455	5.33585e-10	0.0502632	9	BRAIN.RNASEQ	8.11914	4.69e-16	33523105
			Brain_Anterior_cingulate_cortex_BA24	6.97325	0.351652	3.09698e-12	0.116051	10	Dorsolateral prefrontal cortex	4.33801	1.44e-05	30824768
			Brain_Caudate_basal_ganglia	6.16979	0.177758	6.83807e-10	0.198474	19
			Brain_Cerebellar_Hemisphere	6.04005	0.183897	1.5407e-09	0.201812	12
			Brain_Cerebellum	6.06552	0.18157	1.31527e-09	0.240443	13
			Brain_Cortex	6.76731	0.291794	1.31199e-11	0.169617	10
			Brain_Frontal_Cortex_BA9	6.76601	0.349081	1.32385e-11	0.176867	10
			Brain_Hippocampus	6.19614	0.277439	5.7866e-10	0.13448	4
			Brain_Hypothalamus	6.03197	0.187172	1.61969e-09	0.186616	11
			Brain_Nucleus_accumbens_basal_ganglia	6.52415	0.2411	6.83904e-11	0.154514	15
			Brain_Spinal_cord_cervical_c-1	6.48767	0.239998	8.71752e-11	0.130659	14
			Brain_Substantia_nigra	5.97998	0.188877	2.23168e-09	0.172764	7
			Colon_Sigmoid	5.80349	0.135004	6.495e-09	0.308003	18
			Colon_Transverse	5.82071	0.145527	5.85989e-09	0.354587	22
			Liver	5.84177	0.150868	5.16498e-09	0.214789	12
			Nerve_Tibial	5.88126	0.151061	4.07165e-09	0.25139	12
			Pancreas	5.96962	0.161321	2.37808e-09	0.199003	19
			Pituitary	5.81791	0.251339	5.95878e-09	0.187025	8
			Small_Intestine_Terminal_Ileum	5.9162	0.15576	3.29472e-09	0.229091	13
			Spleen	5.73569	0.141403	9.71156e-09	0.15196	18
			Stomach	5.74422	0.138943	9.23444e-09	0.316013	21
			Whole_Blood	4.82117	0.138706	1.42721e-06	0.287594	12
2q21.3	TMEM163	protein	Liver	5.03122	0.704412	4.87363e-07	0.102704	23	BRAIN.RNASEQ	7.11075	1.15e-12	33523105
			Nerve_Tibial	5.06914	0.469542	3.99609e-07	0.0785708	29	Dorsolateral prefrontal cortex	4.80129	1.58e-06	30824768
4p15.32	CD38	protein	Brain_Amygdala	-7.54728	-0.50019	4.44432e-14	0.0780681	2	BRAIN.RNASEQ	-9.60442	7.66e-22	33523105
			Brain_Anterior_cingulate_cortex_BA24	-7.12334	-0.359992	1.05341e-12	0.104741	6	Brain Cortex	-6.85	0.752	34504106
			Brain_Caudate_basal_ganglia	-7.72107	-0.346563	1.15356e-14	0.204845	6	Dorsolateral prefrontal cortex	-4.55607	5.21e-06	30824768
			Brain_Cerebellar_Hemisphere	-6.45101	-0.329247	1.11106e-10	0.0618513	11
			Brain_Cerebellum	-6.43587	-0.315676	1.22768e-10	0.0881209	11
			Brain_Cortex	-7.66135	-0.339315	1.83992e-14	0.232332	14
			Brain_Frontal_Cortex_BA9	-7.57289	-0.379423	3.65005e-14	0.0614855	11
			Brain_Hypothalamus	-8.00219	-0.400104	1.22229e-15	0.0719161	7
			Brain_Nucleus_accumbens_basal_ganglia	-7.4789	-0.250473	7.49483e-14	0.179572	21
			Brain_Putamen_basal_ganglia	-7.68745	-0.356138	1.50091e-14	0.157942	6
	BST1	protein	Whole_Blood	-4.80163	-0.227847	1.5738e-06			monocytes	-5.1599	2.47e-07	30824768
4p16.3	GAK	protein	Brain_Anterior_cingulate_cortex_BA24	5.76905	2.11223	7.97189e-09	0.112279	3	Brain Cerebellum	5.21	1.85e-07	34504106
			Brain_Cerebellar_Hemisphere	6.18652	0.234347	6.15083e-10	0.13697	21
			Brain_Cerebellum	6.13887	0.274811	8.31102e-10	0.100946	18
	IDUA	protein	Brain_Anterior_cingulate_cortex_BA24	-7.12106	-1.70625	1.07099e-12	0.0341253	5	BRAIN.RNASEQ	-8.33811	7.55e-17	33523105
			Brain_Cortex	-6.35902	-0.676271	2.03048e-10	0.0351469	11
			Brain_Frontal_Cortex_BA9	-7.04955	-1.75595	1.79496e-12	0.0374087	5
			Brain_Hippocampus	-6.76981	-1.94955	1.28949e-11	0.0459564	5
			Brain_Substantia_nigra	-5.43411	-6.40514	5.50706e-08	0.0523153	2
			Pituitary	-5.86058	-0.488185	4.61259e-09	0.0902604	18
			Small_Intestine_Terminal_Ileum	-7.88925	-1.29901	3.0401e-15	0.130231	5
			Spleen	-4.74103	-0.268959	2.12638e-06	0.235126	27
			Stomach	-7.57841	-0.675675	3.49803e-14	0.189243	9
	TMEM175	protein	Brain_Amygdala	-6.18151	-0.494739	6.34903e-10	0.0888786	2	BRAIN.RNASEQ_SPLICING	8.57145	1.02e-17	33523105
			Brain_Cerebellar_Hemisphere	-6.2165	-0.445919	5.08378e-10	0.180382	2
			Brain_Cerebellum	-6.57057	-0.228164	5.01223e-11	0.213324	4
			Brain_Cortex	-4.94559	-0.195566	7.59134e-07	0.137569	17
			Brain_Frontal_Cortex_BA9	-4.92623	-0.205989	8.38331e-07	0.160592	9
			Brain_Hippocampus	-6.12283	-0.91489	9.19306e-10	0.0611415	1
			Brain_Hypothalamus	-5.95421	-0.408021	2.61336e-09	0.028672	5
			Brain_Nucleus_accumbens_basal_ganglia	-5.57837	-0.300511	2.42786e-08	0.0467531	7
			Brain_Spinal_cord_cervical_c-1	-6.12283	-0.736579	9.19306e-10	0.0771838	1
			Brain_Substantia_nigra	-6.12283	-0.812929	9.19306e-10	0.0939655	1
			Colon_Sigmoid	-5.53077	-0.618503	3.18825e-08	0.0668863	5
			Nerve_Tibial	-5.57304	-0.449799	2.50339e-08	0.0577544	16
			Pancreas	-5.92081	-0.500366	3.20365e-09	0.0200741	7
			Pituitary	-5.49427	-0.39088	3.92326e-08	0.115753	7
			Small_Intestine_Terminal_Ileum	-6.12283	-1.0252	9.19306e-10	0.0394536	1
			Spleen	-4.9521	-0.458004	7.34155e-07	0.0497361	13
4q21.1	FAM47E	protein	Brain_Substantia_nigra	-4.60379	-0.314154	4.14876e-06	0.372821	6	BRAIN.RNASEQ_SPLICING	6.42905	1.28e-10	33523105
			Pancreas	-5.26771	-0.132439	1.38136e-07	0.558839	14
			Spleen	-5.43512	-0.219444	5.47583e-08	0.353972	15
4q22.1	MMRN1	protein	Brain_Amygdala	8.30485	0.242047	9.9943e-17	0.322686	12	BRAIN.RNASEQ	10.2062	1.86e-24	33523105
			Brain_Anterior_cingulate_cortex_BA24	7.94051	0.194188	2.01344e-15	0.278918	48	Brain Frontal cortex BA9	9.34	9.49e-21	34504106
			Brain_Caudate_basal_ganglia	8.46701	0.225059	2.51762e-17	0.198752	18	Dorsolateral prefrontal cortex	6.51839	7.11e-11	30824768
			Brain_Cerebellar_Hemisphere	7.91084	0.277939	2.55648e-15	0.132962	6
			Brain_Cerebellum	6.89104	0.221574	5.53873e-12	0.141672	6
			Brain_Cortex	8.70768	0.248453	3.10167e-18	0.177688	18
			Brain_Frontal_Cortex_BA9	8.71686	0.243396	2.86034e-18	0.240942	20
			Brain_Hippocampus	7.92871	0.233161	2.21425e-15	0.270086	8
			Brain_Hypothalamus	8.16046	0.241831	3.33754e-16	0.187483	14
			Brain_Nucleus_accumbens_basal_ganglia	8.67149	0.238871	4.26506e-18	0.172751	14
			Brain_Putamen_basal_ganglia	8.49922	0.233602	1.90862e-17	0.301816	16
			Brain_Spinal_cord_cervical_c-1	8.37312	0.216206	5.61121e-17	0.155435	26
			Brain_Substantia_nigra	8.14671	0.236225	3.73974e-16	0.25494	12
			Colon_Transverse	7.66932	0.582853	1.72914e-14	0.0226414	9
			Liver	7.48818	0.520328	6.98349e-14	0.1707	14
			Nerve_Tibial	7.63374	0.535146	2.28038e-14	0.163742	11
			Pituitary	7.91924	0.239211	2.38975e-15	0.221667	15
			Stomach	7.67976	0.572401	1.5939e-14	0.060042	8
	SNCA	protein	Brain_Amygdala	-6.1033	-0.972037	1.03899e-09	0.0498553	4	BRAIN.RNASEQ	-15.4946	3.77e-54	33523105
			Brain_Caudate_basal_ganglia	-7.12775	-1.41993	1.02025e-12	0.0385143	4
			Spleen	5.58887	0.401713	2.28548e-08	0.0396622	6
			Whole_Blood	-7.53571	-0.621824	4.85695e-14	0.0375126	3
	SCARB2	protein	Brain_Caudate_basal_ganglia	4.90836	0.324364	9.18392e-07	0.110318		CMC.BRAIN.RNASEQ	3.55776	0.000374	33523105
			Brain_Cerebellar_Hemisphere	4.79258	0.57254	1.6465e-06	0.0462841
			Brain_Cerebellum	6.14092	0.381523	8.20454e-10	0.101811
			Brain_Cortex	5.31795	0.781723	1.04944e-07	0.0272325
			Brain_Frontal_Cortex_BA9	5.95586	0.422664	2.58706e-09	0.0772546
			Brain_Hypothalamus	6.45119	0.588331	1.10975e-10	0.0327947
			Brain_Putamen_basal_ganglia	6.06339	0.502422	1.3328e-09	0.116191
			Whole_Blood	5.95594	0.239312	2.58574e-09	0.0979118
5q12.1	ERCC8	protein	spleen	5.24321	0.283138	1.57809e-07	0.0865493		CMC.BRAIN.RNASEQ	-3.61273	0.000303
7p15.3	GPNMB	protein	Liver	4.99877	1.96094	5.7697e-07	0.0843588	7	GTEx.Brain_Cortex	8.6267	6.31e-18	33523105
			Whole_Blood	5.74068	0.85195	9.42946e-09	0.0541513	9	Brain Amygdala	5.84	5.31e-09	34504106
									Dorsolateral prefrontal cortex	5.4963	3.88e-08	30824768
	NUPL2	protein	Brain_Amygdala	5.29904	0.176343	1.16412e-07	0.158159	4	Brain_Cerebellar_Hemisphere	8.505	1.82e-17	33523105
			Brain_Anterior_cingulate_cortex_BA24	5.42868	0.140521	5.67734e-08	0.340283	13	Brain Cerebella hemisphere	5.69	1.24e-08	34504106
			Brain_Caudate_basal_ganglia	5.59416	0.163563	2.21697e-08	0.295426	15
			Brain_Cerebellar_Hemisphere	5.51682	0.126081	3.45185e-08	0.484457	15
			Brain_Cerebellum	5.50984	0.123398	3.59158e-08	0.454518	18
			Brain_Cortex	5.52663	0.122573	3.26449e-08	0.388835	10
			Brain_Frontal_Cortex_BA9	5.55967	0.109065	2.70291e-08	0.393711	20
			Brain_Hippocampus	5.5044	0.151882	3.70418e-08	0.348355	12
			Brain_Hypothalamus	5.51147	0.144197	3.55847e-08	0.325135	15
			Brain_Nucleus_accumbens_basal_ganglia	5.25878	0.120965	1.45016e-07	0.297436	18
			Brain_Putamen_basal_ganglia	5.5981	0.163087	2.1671e-08	0.243198	15
			Brain_Spinal_cord_cervical_c-1	5.94842	0.314212	2.70742e-09	0.431651	4
			Brain_Substantia_nigra	5.54709	0.155687	2.90458e-08	0.388957	17
			Colon_Transverse	5.23506	0.189907	1.64927e-07	0.174519	17
			Liver	5.11375	0.170373	3.15829e-07	0.043112	15
			Nerve_Tibial	5.29169	0.144057	1.21191e-07	0.296001	19
			Pancreas	5.677	0.209312	1.37077e-08	0.0483793	15
			Pituitary	5.62666	0.15779	1.83735e-08	0.244911	14
			Small_Intestine_Terminal_Ileum	5.64359	0.206951	1.66539e-08	0.148018	12
			Spleen	5.54808	0.208693	2.88819e-08	0.361777	16
			Stomach	5.57553	0.213045	2.46782e-08	0.128353	14
			Whole_Blood	5.64323	0.252954	1.66888e-08	0.069935	11
8p23.1	CTSB	protein	Brain_Cerebellum	-4.83442	-0.184361	1.33532e-06	0.153457	15	BRAIN.RNASEQ	-7.4711	7.96e-14	33523105
									Dorsolateral prefrontal cortex	-5.7427	9.32e-09	30824768
			Brain_Cerebellar_Hemisphere	-7.59266	-0.366571	3.13409e-14	0.222039	14
			Brain_Cerebellum	-7.47334	-0.301641	7.81825e-14	0.3492	14
			Brain_Cortex	-7.95812	-0.691954	1.74679e-15	0.130846	10
			Brain_Frontal_Cortex_BA9	-5.69525	-0.329152	1.23189e-08	0.0713216	7
			Brain_Nucleus_accumbens_basal_ganglia	-9.60666	-0.605709	7.49412e-22	0.256865	15
			Brain_Putamen_basal_ganglia	-7.81501	-0.539649	5.49607e-15	0.078228	11
12q24.31	HIP1R	protein	Brain_Cerebellar_Hemisphere	-5.87674	-0.218912	4.18412e-09	0.129327	26	BRAIN.RNASEQ	-6.43021	1.27e-10	33523105
			Brain_Cerebellum	-6.78795	-0.276545	1.13738e-11	0.270616	5
16p11.2	CCDC189	protein	Brain_Amygdala	4.75874	0.736516	1.94801e-06	0.109317	1	Brain Cortex	5.91	3.35e-09	34504106
			Brain_Anterior_cingulate_cortex_BA24	5.58754	0.361788	2.30307e-08	0.0914856	7
			Brain_Caudate_basal_ganglia	5.59642	0.358543	2.18823e-08	0.182368	7
			Brain_Cerebellar_Hemisphere	4.68622	0.31782	2.78303e-06	0.0513377	12
			Brain_Cerebellum	5.53174	0.38252	3.17072e-08	0.0420856	7
			Brain_Cortex	5.59544	0.353127	2.20065e-08	0.216613	7
			Brain_Frontal_Cortex_BA9	5.36587	0.299402	8.05592e-08	0.198962	14
			Brain_Hippocampus	5.55126	0.377187	2.83622e-08	0.155072	7
			Brain_Hypothalamus	5.51544	0.216423	3.47903e-08	0.13932	8
			Brain_Nucleus_accumbens_basal_ganglia	5.38585	0.302402	7.21025e-08	0.334241	13
			Brain_Putamen_basal_ganglia	5.59143	0.364108	2.25209e-08	0.0438102	7
			Nerve_Tibial	4.69946	0.279074	2.60852e-06	0.0675398	3
			Pancreas	5.61017	0.429811	2.02124e-08	0.0745071	7
			Pituitary	5.46015	0.200018	4.75739e-08	0.407566	11
			Stomach	5.61917	0.480942	1.91879e-08	0.0219184	6
	HSD3B7	protein	Brain_Cortex	-5.85403	-0.440644	4.79805e-09	0.0635946	9	BRAIN.RNASEQ	-6.1356	8.48e-10	33523105
			Whole_Blood	4.90666	0.27429	9.2642e-07	0.0692604	3	Dorsolateral prefrontal cortex	-4.2361	2.27e-05	30824768
	RNF40	protein	Brain_Amygdala	-5.40702	-0.493168	6.40831e-08	0.0689848	2	Brain Cerebella hemisphere	-6.24	0.442	34504106
			Brain_Anterior_cingulate_cortex_BA24	-4.73447	-0.234129	2.19633e-06	0.0628183	8
			Brain_Frontal_Cortex_BA9	-5.10551	-0.493908	3.29898e-07	0.0370214	1
			Brain_Hippocampus	-4.55939	-0.206785	5.13026e-06	0.063903	8
			Brain_Nucleus_accumbens_basal_ganglia	-5.66674	-0.296018	1.45538e-08	0.154774	8
			Brain_Substantia_nigra	-4.65495	-0.222407	3.24066e-06	0.164184	8
	VKORC1	protein	Brain_Anterior_cingulate_cortex_BA24	4.5396	0.504756	5.63599e-06	0.0365181	1	BRAIN.RNASEQ	5.3375	9.42e-08	33523105
			Brain_Cerebellum	5.12212	0.36589	3.02113e-07	0.029663	4	Brain Cortex	5.95	2.66e-09	34504106
			Brain_Cortex	5.14908	0.372336	2.6177e-07	0.104313	4
			Brain_Nucleus_accumbens_basal_ganglia	5.09669	0.387848	3.45646e-07	0.0305425	4
			Liver	-5.28125	-0.0977994	1.28306e-07	0.520342	8
			Pituitary	4.95352	0.396545	7.28832e-07	0.0659257	7
			Small_Intestine_Terminal_Ileum	-4.72055	-0.193139	2.35211e-06	0.18766	4
			Spleen	4.82188	0.245154	1.42213e-06	0.0924168	5
			Whole_Blood	5.59348	0.296745	2.22559e-08	0.0490314	12
17p12	ZSWIM7	protein	Brain_Amygdala	5.03888	0.165763	4.68259e-07	0.266058	8	Brain Cerebella hemisphere	-5.38	7.25e-08	34504106
			Brain_Anterior_cingulate_cortex_BA24	5.22989	0.159157	1.69613e-07	0.544613	11
			Brain_Caudate_basal_ganglia	5.06764	0.130371	4.02788e-07	0.34516	3
			Brain_Cerebellar_Hemisphere	-5.14198	-0.230743	2.71856e-07	0.33488	6
			Brain_Cerebellum	-5.17381	-0.20421	2.29364e-07	0.425497	7
			Brain_Cortex	5.20234	0.114079	1.96791e-07	0.515311	5
			Brain_Frontal_Cortex_BA9	5.24059	0.161525	1.60063e-07	0.38576	12
			Brain_Hippocampus	5.23822	0.149777	1.62135e-07	0.117023	5
			Brain_Hypothalamus	5.4208	0.291336	5.93337e-08	0.301391	17
			Brain_Nucleus_accumbens_basal_ganglia	5.05686	0.12946	4.26207e-07	0.350138	3
			Colon_Transverse	-5.07178	-8.32808	3.94104e-07	0.0944066	3
			Pituitary	-4.89863	-0.985719	9.65095e-07	0.186933	3
			Small_Intestine_Terminal_Ileum	-5.02878	-0.120213	4.93617e-07	0.314321	7
			Spleen	-5.29908	-0.124678	1.16385e-07	0.51671	18
			Whole_Blood	4.70483	0.287731	2.54081e-06	0.078956	27
17q21.31	ARL17A	protein	Brain_Caudate_basal_ganglia	-5.60966	-0.330023	2.02728e-08	0.379656	14	Brain Putamen basal ganglia	-9.31	1.33e-20	34504106
			Brain_Cerebellar_Hemisphere	-7.26796	-0.23108	3.64964e-13	0.581608	36
			Brain_Cerebellum	-5.81898	-0.278345	5.92089e-09	0.594722	34
			Brain_Cortex	-6.41301	-0.332222	1.4267e-10	0.518643	19
			Brain_Frontal_Cortex_BA9	-6.53135	-0.338024	6.51795e-11	0.527336	18
			Brain_Nucleus_accumbens_basal_ganglia	-7.78761	-0.350309	6.82866e-15	0.378843	17
			Brain_Putamen_basal_ganglia	-7.18762	-0.31673	6.59324e-13	0.280291	25
			Pituitary	-7.98334	-0.270609	1.42422e-15	0.562169	35
	FMNL1	protein	Brain_Cerebellar_Hemisphere	8.16876	0.441579	3.11584e-16	0.364383	17	Brain_Cerebellar_Hemisphere	7.0706	1.54e-12	33523105
			Brain_Cerebellum	8.89001	0.47709	6.11027e-19	0.344783	12	Brain Cerebellun	8.65	4.95e-18	34504106
	LRRC37A	protein	Brain_Anterior_cingulate_cortex_BA24	-7.37366	-0.322224	1.66012e-13	0.610701	9	Brain_Cerebellum	-14.1662	1.48e-45	33523105
			Brain_Caudate_basal_ganglia	-7.46988	-0.352732	8.02684e-14	0.594686	12	Brain Cerebellum	-9.36	7.85e-21	34504106
			Brain_Cerebellum	-8.73892	-0.389115	2.35352e-18	0.639676	23
			Brain_Cortex	-5.74801	-0.412894	9.03026e-09	0.664468	23
			Brain_Hippocampus	-5.97805	-0.503918	2.25825e-09	0.545917	22
			Brain_Hypothalamus	-6.27108	-0.40065	3.58561e-10	0.64602	29
			Brain_Nucleus_accumbens_basal_ganglia	-6.3056	-0.469983	2.8708e-10	0.642156	29
			Brain_Spinal_cord_cervical_c-1	-5.08755	-0.429369	3.62715e-07	0.426441	14
			Brain_Substantia_nigra	-6.11114	-0.438854	9.89197e-10	0.449896	13
			Colon_Transverse	-6.26666	-0.293283	3.68871e-10	0.471087	51
			Pancreas	5.15838	0.576474	2.491e-07	0.408681	15
			Pituitary	-7.59438	-0.354875	3.09269e-14	0.674293	11
	MAPT	protein	Brain_Cerebellar_Hemisphere	7.64834	0.934009	2.03595e-14	0.0518215	5	Brain_Frontal_Cortex_BA9	15.8054	2.85e-56	33523105
			Brain_Cerebellum	6.26483	0.810427	3.73225e-10	0.0684396	5
			Spleen	-9.76754	-0.503205	1.55171e-22	0.0829377	8
	PLEKHM1	protein	Brain_Amygdala	-8.00563	-0.951804	1.18855e-15	0.170615	9	Brain_Cerebellar_Hemisphere	15.5949	7.89e-55	33523105
			Brain_Anterior_cingulate_cortex_BA24	-8.1244	-1.00915	4.49594e-16	0.198664	5	Brain Cerebella hemisphere	8.94	3.76e-19	34504106
			Brain_Caudate_basal_ganglia	-8.20136	-0.594114	2.37678e-16	0.206555	11
			Brain_Cerebellum	9.48863	0.309513	2.34088e-21	0.602922	35
			Brain_Cortex	-8.16508	-0.895538	3.21222e-16	0.287031	7
			Brain_Frontal_Cortex_BA9	-8.21073	-0.945084	2.19841e-16	0.222759	13
			Brain_Hippocampus	-8.26672	-0.917877	1.37696e-16	0.105906	8
			Brain_Hypothalamus	-7.63016	-1.02856	2.34458e-14	0.103695	14
			Brain_Nucleus_accumbens_basal_ganglia	-7.3332	-0.417552	2.24725e-13	0.279554	17
			Brain_Putamen_basal_ganglia	-7.92064	-0.952288	2.36288e-15	0.271433	14
			Brain_Substantia_nigra	-8.81545	-3.05473	1.19207e-18	0.0375276	2
			Colon_Sigmoid	-8.34779	-1.02544	6.95533e-17	0.0457754	7
			Colon_Transverse	-8.30517	-1.09464	9.96786e-17	0.0392162	5
			Nerve_Tibial	-8.03367	-1.20537	9.46007e-16	0.0197496	2
			Pancreas	-7.78054	-0.844535	7.22157e-15	0.0134878	5
			Pituitary	-7.82814	-1.26514	4.95145e-15	0.0758392	13
			Spleen	-8.35101	-0.558902	6.76845e-17	0.0860328	14
			Stomach	-8.3362	-1.05915	7.67132e-17	0.0320032	6
			Whole_Blood	5.30487	0.463185	1.12756e-07	0.0421316	34
	SPPL2C	protein	Brain_Cerebellar_Hemisphere	-9.48729	-0.453513	2.3712e-21	0.368775	11	Brain Cerebella hemisphere	-6	1.98e-09	34504106
			Brain_Cerebellum	-9.29626	-0.289716	1.45477e-20	0.37745	7
			Brain_Cortex	-6.92043	-0.923923	4.50281e-12	0.0675875	8
			Brain_Frontal_Cortex_BA9	-6.27356	-0.439994	3.52881e-10	0.0668948	11
17q21.31-q21.32	LRRC37A2	protein	Brain_Cerebellar_Hemisphere	-7.96239	-0.279741	1.68746e-15	0.672032	26	Brain_Putamen_basal_ganglia	-14.8551	6.45e-50	33523105
			Brain_Cerebellum	-7.90683	-0.277391	2.64019e-15	0.698662	28	Brain Hypothalamu	-9.63	6.12e-22	34504106
			Brain_Cortex	-7.72891	-0.230008	1.08472e-14	0.730578	46
			Brain_Frontal_Cortex_BA9	-8.02705	-0.251088	9.98448e-16	0.701871	31
			Brain_Hippocampus	-8.70092	-0.268888	3.29197e-18	0.617229	22
			Brain_Hypothalamus	-8.67661	-0.260027	4.0775e-18	0.676612	25
			Brain_Putamen_basal_ganglia	-8.90419	-0.268027	5.37775e-19	0.590505	19
			Colon_Transverse	-7.40248	-0.266344	1.3366e-13	0.497307	33
			Nerve_Tibial	-6.5955	-0.306114	4.23811e-11	0.592856	40
			Pancreas	-7.63514	-0.297271	2.25569e-14	0.427262	32
			Spleen	-6.6348	-0.291527	3.24946e-11	0.487414	28
			Stomach	-7.43219	-0.286975	1.06816e-13	0.515971	30
