# Supplementary material for: Joint analysis of proteome, transcriptome, and multi-trait analysis to identify novel Parkinson’s disease risk genes
Source: Aging (Albany NY). 2024 Jan 17;16(2):1555–80. doi: 10.18632/aging.205444 (PMC10866412; doi:10.18632/aging.205444)
Supplement: Supplementary Table 13 [file aging-16-205444-s012.xlsx]

## Sheet: Additional file12 (Table S11)
Supplementary Table 13. Fine-mapping of causal gene sets (FOCUS) of PD GWAS summary statistics.
ens_gene_id	ens_tx_id	mol_name	tissue	ref_name	type	chrom	tx_start	tx_stop	inference	cv.R2	cv.R2.pval	twas_z	pip	in_cred_set	region
ENSG00000004468	NA	CD38	Brain_Amygdala1	gtex	protein_coding	chr4	15725335	15725336	en	0.0780681	0.00134278	-7.23	1	0	4:15147446-4:15926136
ENSG00000145214	NA	DGKQ	Brain_Amygdala1	gtex	protein_coding	chr4	958751	958752	en	0.0472909	0.0133018	-5.21	1	1	4:695146-4:1478711
ENSG00000138722	NA	MMRN1	Brain_Amygdala1	gtex	protein_coding	chr4	90830691	90830692	en	0.322686	2.2e-12	8.34	1	0	4:90231746-4:91560677
ENSG00000117280	NA	RAB29	Brain_Amygdala1	gtex	protein_coding	chr1	205745384	205745385	en	0.0502632	0.010644	6.08	1	0	1:204681068-1:205922403
ENSG00000127419	NA	TMEM175	Brain_Amygdala1	gtex	protein_coding	chr4	958378	958379	en	0.0888786	0.000600328	-5.97	1	1	4:695146-4:1478711
ENSG00000228696	NA	ARL17B	Brain_Amygdala1	gtex	protein_coding	chr17	44373721	44373722	en	0.35615	8.42e-14	-8.74	0.982	0	17:43056905-17:45876022
ENSG00000136243	NA	NUPL2	Brain_Amygdala1	gtex	protein_coding	chr7	23266155	23266156	en	0.158159	3.06e-06	4.83	0.853	1	7:22508611-7:23469560
ENSG00000103510	NA	KAT8	Brain_Amygdala1	gtex	protein_coding	chr16	31134190	31134191	en	0.157045	3.34e-06	-5.42	0.726	1	16:29036613-16:31382470
ENSG00000141027	NA	NCOR1	Brain_Amygdala1	gtex	protein_coding	chr17	16008678	16008679	en	0.0546965	0.00764112	5.07	0.608	1	17:15020965-17:16411522
ENSG00000011295	NA	TTC19	Brain_Amygdala1	gtex	protein_coding	chr17	15992867	15992868	en	0.144122	9.12e-06	-4.97	0.373	0	17:15020965-17:16411522
ENSG00000133256	NA	PDE6B	Brain_Amygdala1	gtex	protein_coding	chr4	650247	650248	en	0.0759657	0.00156999	2.87	0.29	0	4:695146-4:1478711
ENSG00000152128	NA	TMEM163	Brain_Amygdala1	gtex	protein_coding	chr2	135322820	135322821	en	0.0416905	0.0202866	4.02	0.29	0	2:135159453-2:137042794
ENSG00000169242	NA	EFNA1	Brain_Amygdala1	gtex	protein_coding	chr1	155095158	155095159	en	0.0558726	0.00699908	4	0.28	0	1:154770403-1:156336133
ENSG00000103496	NA	STX4	Brain_Amygdala1	gtex	protein_coding	chr16	31011183	31011184	en	0.0695574	0.00252789	5.16	0.191	1	16:29036613-16:31382470
ENSG00000230658	NA	KLHL7-DT	Brain_Amygdala1	gtex	lncRNA	chr7	23100428	23100429	en	0.494811	1.47e-20	-4.3	0.0791	0	7:22508611-7:23469560
ENSG00000184445	NA	KNTC1	Brain_Amygdala1	gtex	protein_coding	chr12	123072119	123072120	en	0.0531559	0.00857286	-3.57	0.074	0	12:122009763-12:124976982
ENSG00000151006	NA	PRSS53	Brain_Amygdala1	gtex	protein_coding	chr16	31095400	31095401	en	0.0362955	0.0305714	4.7	0.024	0	16:29036613-16:31382470
ENSG00000232748	NA	AC135050.1	Brain_Amygdala1	gtex	lncRNA	chr16	31020270	31020271	en	0.0473404	0.0132524	4.69	0.0236	0	16:29036613-16:31382470
ENSG00000260911	NA	AC135050.3	Brain_Amygdala1	gtex	lncRNA	chr16	31081027	31081028	en	0.0858583	0.000751932	-4.69	0.0215	0	16:29036613-16:31382470
ENSG00000214401	NA	KANSL1-AS1	Brain_Amygdala1	gtex	lncRNA	chr17	44422522	44422523	en	0.552675	6.16e-24	-8.26	0.0188	0	17:43056905-17:45876022
ENSG00000196118	NA	CCDC189	Brain_Amygdala1	gtex	protein_coding	chr16	30747191	30747192	en	0.109317	0.000129772	4.54	0.015	0	16:29036613-16:31382470
ENSG00000122550	NA	KLHL7	Brain_Amygdala1	gtex	protein_coding	chr7	23166065	23166066	en	0.0309927	0.0459702	-3.68	0.0121	0	7:22508611-7:23469560
ENSG00000232759	NA	AC002480.1	Brain_Amygdala1	gtex	lncRNA	chr7	22599888	22599889	en	0.0640523	0.00380626	-3.13	0.0111	0	7:22508611-7:23469560
ENSG00000189157	NA	FAM47E	Brain_Amygdala1	gtex	protein_coding	chr4	77128177	77128178	en	0.316101	4.11e-12	-2.78	0.0068	0	4:77130707-4:79093979
ENSG00000214941	NA	ZSWIM7	Brain_Amygdala1	gtex	protein_coding	chr17	15895077	15895078	en	0.266058	3.96e-10	4.03	0.00667	0	17:15020965-17:16411522
ENSG00000177234	NA	LINC01561	Brain_Amygdala1	gtex	lncRNA	chr10	122366680	122366681	en	0.0737289	0.00185401	-2.71	0.00565	0	10:120591693-10:122407323
ENSG00000103549	NA	RNF40	Brain_Amygdala1	gtex	protein_coding	chr16	30979610	30979611	en	0.0689848	0.0026378	-4.34	0.00501	0	16:29036613-16:31382470
ENSG00000232949	NA	AC002480.2	Brain_Amygdala1	gtex	lncRNA	chr7	22637375	22637376	en	0.0712645	0.00222668	-2.73	0.00379	0	7:22508611-7:23469560
ENSG00000162877	NA	PM20D1	Brain_Amygdala1	gtex	protein_coding	chr1	205818403	205818404	en	0.162455	2.18e-06	-1.35	0.00334	0	1:204681068-1:205922403
ENSG00000176681	NA	LRRC37A	Brain_Amygdala1	gtex	protein_coding	chr17	44363933	44363934	en	0.577101	1.71e-25	-2.47	0.00318	0	17:43056905-17:45876022
ENSG00000082258	NA	CCNT2	Brain_Amygdala1	gtex	protein_coding	chr2	135701684	135701685	en	0.0545362	0.00773308	-2.56	0.00285	0	2:135159453-2:137042794
ENSG00000168291	NA	PDHB	Brain_Amygdala1	gtex	protein_coding	chr3	58355405	58355406	en	0.219162	2.21e-08	-2.43	0.00278	0	3:58157850-3:60272829
ENSG00000133065	NA	SLC41A1	Brain_Amygdala1	gtex	protein_coding	chr1	205770009	205770010	en	0.0676434	0.00291436	2.03	0.00265	0	1:204681068-1:205922403
ENSG00000234745	NA	HLA-B	Brain_Amygdala1	gtex	protein_coding	chr6	31535317	31535318	en	0.138657	1.39e-05	2.4	0.00258	0	6:31571337-6:32682664
ENSG00000188906	NA	LRRK2	Brain_Amygdala1	gtex	protein_coding	chr12	40562234	40562235	en	0.0660754	0.00327466	2.4	0.00258	0	12:39227446-12:40816185
ENSG00000183605	NA	SFXN4	Brain_Amygdala1	gtex	protein_coding	chr10	120921338	120921339	en	0.536305	6.13e-23	2.36	0.00238	0	10:120591693-10:122407323
ENSG00000204290	NA	BTNL2	Brain_Amygdala1	gtex	protein_coding	chr6	32428958	32428959	en	0.0394354	0.0240682	2.31	0.00211	0	6:31571337-6:32682664
ENSG00000225914	NA	TSBP1-AS1	Brain_Amygdala1	gtex	lncRNA	chr6	32236763	32236764	en	0.0698295	0.00247729	2.3	0.00208	0	6:31571337-6:32682664
ENSG00000250091	NA	DNAH10OS	Brain_Amygdala1	gtex	lncRNA	chr12	124437213	124437214	en	0.0754787	0.00162787	2.28	0.00206	0	12:122009763-12:124976982
ENSG00000178226	NA	PRSS36	Brain_Amygdala1	gtex	protein_coding	chr16	31168421	31168422	en	0.158715	2.93e-06	-4.08	0.00197	0	16:29036613-16:31382470
ENSG00000225190	NA	PLEKHM1	Brain_Amygdala1	gtex	protein_coding	chr17	43504120	43504121	en	0.170615	1.15e-06	-7.18	0.00192	0	17:43056905-17:45876022
ENSG00000278133	NA	AC135050.6	Brain_Amygdala1	gtex	lncRNA	chr16	31106747	31106748	en	0.0518913	0.00942289	4.06	0.00191	0	16:29036613-16:31382470
ENSG00000204351	NA	SKIV2L	Brain_Amygdala1	gtex	protein_coding	chr6	31941828	31941829	en	0.216558	2.75e-08	2.25	0.00188	0	6:31571337-6:32682664
ENSG00000160803	NA	UBQLN4	Brain_Amygdala1	gtex	protein_coding	chr1	156014906	156014907	en	0.0843646	0.000840432	2.26	0.00156	0	1:154770403-1:156336133
ENSG00000099377	NA	HSD3B7	Brain_Amygdala1	gtex	protein_coding	chr16	30967687	30967688	en	0.0725123	0.00202946	-3.14	0.00151	0	16:29036613-16:31382470
ENSG00000138750	NA	NUP54	Brain_Amygdala1	gtex	protein_coding	chr4	77074567	77074568	en	0.253711	1.17e-09	-2.14	0.00145	0	4:77130707-4:79093979
ENSG00000103472	NA	RRN3P2	Brain_Amygdala1	gtex	lncRNA	chr16	29136668	29136669	en	0.0358493	0.0316323	1.74	0.00128	0	16:29036613-16:31382470
ENSG00000169231	NA	THBS3	Brain_Amygdala1	gtex	protein_coding	chr1	155169448	155169449	en	0.173215	9.32e-07	2.11	0.00112	0	1:154770403-1:156336133
ENSG00000173171	NA	MTX1	Brain_Amygdala1	gtex	protein_coding	chr1	155182717	155182718	en	0.0444686	0.0164481	-2.09	0.00109	0	1:154770403-1:156336133
ENSG00000163354	NA	DCST2	Brain_Amygdala1	gtex	protein_coding	chr1	154970895	154970896	en	0.112386	0.000102947	-1.97	0.00101	0	1:154770403-1:156336133
ENSG00000178882	NA	RFLNA	Brain_Amygdala1	gtex	protein_coding	chr12	124595364	124595365	en	0.0665882	0.00315217	1.86	0.000872	0	12:122009763-12:124976982
ENSG00000185619	NA	PCGF3	Brain_Amygdala1	gtex	protein_coding	chr4	735220	735221	en	0.182837	4.32e-07	-1.96	0.00083	0	4:695146-4:1478711
ENSG00000242686	NA	AC107464.1	Brain_Amygdala1	gtex	lncRNA	chr4	673412	673413	en	0.293582	3.33e-11	1.67	0.00078	0	4:695146-4:1478711
ENSG00000272360	NA	AC116036.2	Brain_Amygdala1	gtex	lncRNA	chr3	58441587	58441588	en	0.154793	3.98e-06	-1.8	0.000764	0	3:58157850-3:60272829
ENSG00000204308	NA	RNF5	Brain_Amygdala1	gtex	protein_coding	chr6	32151934	32151935	en	0.0737861	0.00184613	-1.75	0.000713	0	6:31571337-6:32682664
ENSG00000233002	NA	AC005324.1	Brain_Amygdala1	gtex	lncRNA	chr17	15647997	15647998	en	0.247547	1.99e-09	-1.74	0.000712	0	17:15020965-17:16411522
ENSG00000007062	NA	PROM1	Brain_Amygdala1	gtex	protein_coding	chr4	16015672	16015673	en	0.0416616	0.0203311	-1.71	0.000712	0	4:15147446-4:15926136
ENSG00000178209	NA	PLEC	Brain_Amygdala1	gtex	protein_coding	chr8	145027803	145027804	en	0.151635	5.09e-06	-1.75	0.000695	0	8:144236881-8:146303788
ENSG00000149922	NA	TBX6	Brain_Amygdala1	gtex	protein_coding	chr16	30091222	30091223	en	0.211089	4.33e-08	-1.12	0.000632	0	16:29036613-16:31382470
ENSG00000276790	NA	AC068234.3	Brain_Amygdala1	gtex	lncRNA	chr17	45415371	45415372	en	0.0353666	0.0328229	1.36	0.000629	0	17:43056905-17:45876022
ENSG00000234283	NA	LINC01731	Brain_Amygdala1	gtex	lncRNA	chr1	147778672	147778673	en	0.0847071	0.000819262	1.69	0.000626	0	1:144977648-1:148360712
ENSG00000240053	NA	LY6G5B	Brain_Amygdala1	gtex	protein_coding	chr6	31588274	31588275	en	0.15435	4.12e-06	1.66	0.000609	0	6:31571337-6:32682664
ENSG00000167701	NA	GPT	Brain_Amygdala1	gtex	protein_coding	chr8	145733371	145733372	en	0.0420017	0.0198147	1.67	0.000608	0	8:144236881-8:146303788
ENSG00000145335	NA	SNCA	Brain_Amygdala1	gtex	protein_coding	chr4	90751220	90751221	en	0.0498553	0.0109742	-7.04	0.000582	0	4:90231746-4:91560677
ENSG00000166582	NA	CENPV	Brain_Amygdala1	gtex	protein_coding	chr17	16258060	16258061	en	0.388644	3.01e-15	0.62	0.000576	0	17:15020965-17:16411522
ENSG00000163382	NA	NAXE	Brain_Amygdala1	gtex	protein_coding	chr1	156761797	156761798	en	0.303139	1.38e-11	-1.66	0.000565	0	1:154770403-1:156336133
ENSG00000143603	NA	KCNN3	Brain_Amygdala1	gtex	protein_coding	chr1	154826634	154826635	en	0.134792	1.87e-05	-1.52	0.000564	0	1:154770403-1:156336133
ENSG00000069275	NA	NUCKS1	Brain_Amygdala1	gtex	protein_coding	chr1	205701100	205701101	en	0.059729	0.00525074	-3.72	0.000561	0	1:204681068-1:205922403
ENSG00000102882	NA	MAPK3	Brain_Amygdala1	gtex	protein_coding	chr16	30141762	30141763	en	0.0451843	0.0155849	-0.919	0.000546	0	16:29036613-16:31382470
ENSG00000204463	NA	BAG6	Brain_Amygdala1	gtex	protein_coding	chr6	31590320	31590321	en	0.215298	3.05e-08	-1.58	0.000535	0	6:31571337-6:32682664
ENSG00000232093	NA	DCST1-AS1	Brain_Amygdala1	gtex	lncRNA	chr1	154990450	154990451	en	0.0533829	0.00842868	-1.4	0.000528	0	1:154770403-1:156336133
ENSG00000143537	NA	ADAM15	Brain_Amygdala1	gtex	protein_coding	chr1	155043570	155043571	en	0.0675111	0.00294316	-1.37	0.000521	0	1:154770403-1:156336133
ENSG00000203499	NA	IQANK1	Brain_Amygdala1	gtex	protein_coding	chr8	144831769	144831770	en	0.0352599	0.0330922	1.56	0.000514	0	8:144236881-8:146303788
ENSG00000267414	NA	AC120049.1	Brain_Amygdala1	gtex	lncRNA	chr18	42261847	42261848	en	0.0507057	0.010297	1.51	0.000472	0	18:39892648-18:42921854
ENSG00000078070	NA	MCCC1	Brain_Amygdala1	gtex	protein_coding	chr3	182801039	182801040	en	0.135277	1.8e-05	-1.47	0.000451	0	3:181511166-3:183769683
ENSG00000114796	NA	KLHL24	Brain_Amygdala1	gtex	protein_coding	chr3	183349089	183349090	en	0.177491	6.63e-07	-1.4	0.000406	0	3:181511166-3:183769683
ENSG00000185803	NA	SLC52A2	Brain_Amygdala1	gtex	protein_coding	chr8	145572325	145572326	en	0.0551636	0.00737927	-1.39	0.000403	0	8:144236881-8:146303788
ENSG00000178222	NA	RNF212	Brain_Amygdala1	gtex	protein_coding	chr4	1117362	1117363	en	0.14681	7.4e-06	2.7	0.00039	0	4:695146-4:1478711
ENSG00000275389	NA	AC068790.9	Brain_Amygdala1	gtex	lncRNA	chr12	124607569	124607570	en	0.0542452	0.00790296	-1.34	0.000389	0	12:122009763-12:124976982
ENSG00000163344	NA	PMVK	Brain_Amygdala1	gtex	protein_coding	chr1	154874969	154874970	en	0.0447314	0.0161257	1.31	0.000387	0	1:154770403-1:156336133
ENSG00000178722	NA	C5orf64	Brain_Amygdala1	gtex	lncRNA	chr5	61018691	61018692	en	0.347509	1.99e-13	1.36	0.000385	0	5:58524622-5:60935451
ENSG00000179344	NA	HLA-DQB1	Brain_Amygdala1	gtex	protein_coding	chr6	32672217	32672218	en	0.623625	1e-28	-1.31	0.000369	0	6:31571337-6:32682664
ENSG00000238045	NA	AC009133.1	Brain_Amygdala1	gtex	lncRNA	chr16	29863268	29863269	en	0.10807	0.000142549	0.547	0.000367	0	16:29036613-16:31382470
ENSG00000139714	NA	MORN3	Brain_Amygdala1	gtex	protein_coding	chr12	122079037	122079038	en	0.130973	2.51e-05	1.27	0.000361	0	12:122009763-12:124976982
ENSG00000136448	NA	NMT1	Brain_Amygdala1	gtex	protein_coding	chr17	43148411	43148412	en	0.0991109	0.000279388	2.29	0.000361	0	17:43056905-17:45876022
ENSG00000272849	NA	AC084018.1	Brain_Amygdala1	gtex	lncRNA	chr12	122212843	122212844	en	0.0691282	0.00260983	-1.28	0.000359	0	12:122009763-12:124976982
ENSG00000180921	NA	FAM83H	Brain_Amygdala1	gtex	protein_coding	chr8	144817015	144817016	en	0.180788	5.09e-07	1.29	0.000356	0	8:144236881-8:146303788
ENSG00000183955	NA	KMT5A	Brain_Amygdala1	gtex	protein_coding	chr12	123842529	123842530	en	0.0327392	0.0401651	1.26	0.000349	0	12:122009763-12:124976982
ENSG00000162836	NA	ACP6	Brain_Amygdala1	gtex	protein_coding	chr1	147133880	147133881	en	0.598155	6.55e-27	1.27	0.000344	0	1:144977648-1:148360712
ENSG00000273133	NA	AC116651.1	Brain_Amygdala1	gtex	lncRNA	chr4	15561742	15561743	en	0.131281	2.45e-05	-0.554	0.000341	0	4:15147446-4:15926136
ENSG00000244731	NA	C4A	Brain_Amygdala1	gtex	protein_coding	chr6	31959723	31959724	en	0.280481	1.09e-10	-1.25	0.000336	0	6:31571337-6:32682664
ENSG00000242252	NA	BGLAP	Brain_Amygdala1	gtex	protein_coding	chr1	156230656	156230657	en	0.0322699	0.041646	1.18	0.000333	0	1:154770403-1:156336133
ENSG00000178852	NA	EFCAB13	Brain_Amygdala1	gtex	protein_coding	chr17	45405272	45405273	en	0.109557	0.000127437	-1.01	0.000333	0	17:43056905-17:45876022
ENSG00000177238	NA	TRIM72	Brain_Amygdala1	gtex	protein_coding	chr16	31223334	31223335	en	0.0984406	0.000293778	1.65	0.000333	0	16:29036613-16:31382470
ENSG00000251575	NA	C5orf64-AS1	Brain_Amygdala1	gtex	lncRNA	chr5	61019700	61019701	en	0.170775	1.13e-06	-1.24	0.00033	0	5:58524622-5:60935451
ENSG00000122591	NA	FAM126A	Brain_Amygdala1	gtex	protein_coding	chr7	22969690	22969691	en	0.0611619	0.00471944	-0.965	0.000329	0	7:22508611-7:23469560
ENSG00000278811	NA	LINC00624	Brain_Amygdala1	gtex	lncRNA	chr1	146776370	146776371	en	0.0589041	0.00558344	1.22	0.000322	0	1:144977648-1:148360712
ENSG00000224389	NA	C4B	Brain_Amygdala1	gtex	protein_coding	chr6	31990785	31990786	en	0.0903601	0.000537503	1.2	0.000318	0	6:31571337-6:32682664
ENSG00000110987	NA	BCL7A	Brain_Amygdala1	gtex	protein_coding	chr12	122411083	122411084	en	0.0704149	0.00237182	-1.16	0.000316	0	12:122009763-12:124976982
ENSG00000120071	NA	KANSL1	Brain_Amygdala1	gtex	protein_coding	chr17	44197654	44197655	en	0.284866	7.37e-11	-7	0.000315	0	17:43056905-17:45876022
ENSG00000169288	NA	MRPL1	Brain_Amygdala1	gtex	protein_coding	chr4	78841274	78841275	en	0.0586822	0.00567648	1.18	0.000309	0	4:77130707-4:79093979
ENSG00000172992	NA	DCAKD	Brain_Amygdala1	gtex	protein_coding	chr17	42919829	42919830	en	0.0546105	0.00769031	0.942	0.000308	0	17:43056905-17:45876022
ENSG00000237541	NA	HLA-DQA2	Brain_Amygdala1	gtex	protein_coding	chr6	32613597	32613598	en	0.572632	3.34e-25	-1.16	0.000305	0	6:31571337-6:32682664
ENSG00000108379	NA	WNT3	Brain_Amygdala1	gtex	protein_coding	chr17	44880020	44880021	en	0.499316	8.3e-21	-2.64	0.000305	0	17:43056905-17:45876022
ENSG00000228649	NA	SNHG26	Brain_Amygdala1	gtex	lncRNA	chr7	22901118	22901119	en	0.0785513	0.00129539	0.837	0.000304	0	7:22508611-7:23469560
ENSG00000175061	NA	SNHG29	Brain_Amygdala1	gtex	lncRNA	chr17	16381203	16381204	en	0.0331846	0.0388099	1.99	0.000299	0	17:15020965-17:16411522
ENSG00000196683	NA	TOMM7	Brain_Amygdala1	gtex	protein_coding	chr7	22871958	22871959	en	0.133465	2.07e-05	-0.773	0.000299	0	7:22508611-7:23469560
ENSG00000169592	NA	INO80E	Brain_Amygdala1	gtex	protein_coding	chr16	30031477	30031478	en	0.0706881	0.00232414	-0.41	0.000298	0	16:29036613-16:31382470
ENSG00000274427	NA	AC145423.2	Brain_Amygdala1	gtex	lncRNA	chr12	123975815	123975816	en	0.0518551	0.00944841	-1.07	0.000297	0	12:122009763-12:124976982
ENSG00000161016	NA	RPL8	Brain_Amygdala1	gtex	protein_coding	chr8	146014113	146014114	en	0.0392809	0.0243522	-1.14	0.000297	0	8:144236881-8:146303788
ENSG00000180900	NA	SCRIB	Brain_Amygdala1	gtex	protein_coding	chr8	144893619	144893620	en	0.0363395	0.0304688	1.14	0.000297	0	8:144236881-8:146303788
ENSG00000214946	NA	TBC1D26	Brain_Amygdala1	gtex	protein_coding	chr17	15651956	15651957	en	0.280581	1.08e-10	0.427	0.000297	0	17:15020965-17:16411522
ENSG00000078579	NA	FGF20	Brain_Amygdala1	gtex	protein_coding	chr8	16847913	16847914	en	0.0325667	0.0407028	-1.14	0.000296	0	8:15991660-8:17387624
ENSG00000133069	NA	TMCC2	Brain_Amygdala1	gtex	protein_coding	chr1	205216717	205216718	en	0.0762339	0.001539	1.14	0.000292	0	1:204681068-1:205922403
ENSG00000204301	NA	NOTCH4	Brain_Amygdala1	gtex	protein_coding	chr6	32180976	32180977	en	0.0500264	0.0108344	-1.11	0.00029	0	6:31571337-6:32682664
ENSG00000175106	NA	TVP23C	Brain_Amygdala1	gtex	protein_coding	chr17	15418440	15418441	en	0.0842733	0.000846164	-0.818	0.00029	0	17:15020965-17:16411522
ENSG00000048342	NA	CC2D2A	Brain_Amygdala1	gtex	protein_coding	chr4	15429512	15429513	en	0.0558122	0.0070307	1.14	0.000285	0	4:15147446-4:15926136
ENSG00000141279	NA	NPEPPS	Brain_Amygdala1	gtex	protein_coding	chr17	45663117	45663118	en	0.150409	5.6e-06	0.419	0.000281	0	17:43056905-17:45876022
ENSG00000260953	NA	AC009093.4	Brain_Amygdala1	gtex	lncRNA	chr16	29291668	29291669	en	0.264495	4.54e-10	0.766	0.000276	0	16:29036613-16:31382470
ENSG00000275371	NA	AC012645.4	Brain_Amygdala1	gtex	lncRNA	chr16	30113188	30113189	en	0.0618848	0.00447225	-0.728	0.000275	0	16:29036613-16:31382470
ENSG00000131778	NA	CHD1L	Brain_Amygdala1	gtex	protein_coding	chr1	146720992	146720993	en	0.131195	2.46e-05	1.05	0.00027	0	1:144977648-1:148360712
ENSG00000117222	NA	RBBP5	Brain_Amygdala1	gtex	protein_coding	chr1	205054649	205054650	en	0.100772	0.000246685	0.793	0.000269	0	1:204681068-1:205922403
ENSG00000196735	NA	HLA-DQA1	Brain_Amygdala1	gtex	protein_coding	chr6	32233453	32233454	en	0.195562	1.55e-07	-1.04	0.000268	0	6:31571337-6:32682664
ENSG00000155975	NA	VPS37A	Brain_Amygdala1	gtex	protein_coding	chr8	17064853	17064854	en	0.0750019	0.00168661	-1.05	0.000268	0	8:15991660-8:17387624
ENSG00000145217	NA	SLC26A1	Brain_Amygdala1	gtex	protein_coding	chr4	977270	977271	en	0.0870954	0.000685703	2.59	0.000267	0	4:695146-4:1478711
ENSG00000163872	NA	YEATS2	Brain_Amygdala1	gtex	protein_coding	chr3	183455743	183455744	en	0.101735	0.000229485	1.03	0.000264	0	3:181511166-3:183769683
ENSG00000102886	NA	GDPD3	Brain_Amygdala1	gtex	protein_coding	chr16	30115133	30115134	en	0.0352748	0.0330545	-0.788	0.000263	0	16:29036613-16:31382470
ENSG00000140691	NA	ARMC5	Brain_Amygdala1	gtex	protein_coding	chr16	31467954	31467955	en	0.0320577	0.0423339	-1.13	0.00026	0	16:29036613-16:31382470
ENSG00000196126	NA	HLA-DRB1	Brain_Amygdala1	gtex	protein_coding	chr6	32233325	32233326	en	0.375167	1.22e-14	1	0.00026	0	6:31571337-6:32682664
ENSG00000174529	NA	TMEM81	Brain_Amygdala1	gtex	protein_coding	chr1	205054649	205054650	en	0.0592576	0.00543834	0.741	0.00026	0	1:204681068-1:205922403
ENSG00000187688	NA	TRPV2	Brain_Amygdala1	gtex	protein_coding	chr17	16357327	16357328	en	0.319389	3.01e-12	-1.79	0.00026	0	17:15020965-17:16411522
ENSG00000149932	NA	TMEM219	Brain_Amygdala1	gtex	protein_coding	chr16	29969766	29969767	en	0.0443852	0.0165518	0.186	0.000251	0	16:29036613-16:31382470
ENSG00000213676	NA	ATF6B	Brain_Amygdala1	gtex	protein_coding	chr6	32117215	32117216	en	0.16013	2.62e-06	0.957	0.000249	0	6:31571337-6:32682664
ENSG00000225855	NA	RUSC1-AS1	Brain_Amygdala1	gtex	lncRNA	chr1	155335325	155335326	en	0.0342621	0.0357241	-0.495	0.000248	0	1:154770403-1:156336133
ENSG00000133059	NA	DSTYK	Brain_Amygdala1	gtex	protein_coding	chr1	205164084	205164085	en	0.137815	1.48e-05	-0.773	0.000246	0	1:204681068-1:205922403
ENSG00000197858	NA	GPAA1	Brain_Amygdala1	gtex	protein_coding	chr8	145113764	145113765	en	0.131834	2.35e-05	-0.957	0.000246	0	8:144236881-8:146303788
ENSG00000276045	NA	ORAI1	Brain_Amygdala1	gtex	protein_coding	chr12	122079929	122079930	en	0.0450937	0.0156916	-0.903	0.000244	0	12:122009763-12:124976982
ENSG00000125409	NA	TEKT3	Brain_Amygdala1	gtex	protein_coding	chr17	15217389	15217390	en	0.0325836	0.0406499	0.215	0.000244	0	17:15020965-17:16411522
ENSG00000076003	NA	MCM6	Brain_Amygdala1	gtex	protein_coding	chr2	136588728	136588729	en	0.0323046	0.0415346	0.408	0.000243	0	2:135159453-2:137042794
ENSG00000276855	NA	AC015922.3	Brain_Amygdala1	gtex	lncRNA	chr17	15681485	15681486	en	0.17896	5.9e-07	0.517	0.000242	0	17:15020965-17:16411522
ENSG00000179428	NA	AC073072.1	Brain_Amygdala1	gtex	lncRNA	chr7	22790046	22790047	en	0.136782	1.61e-05	0.094	0.000241	0	7:22508611-7:23469560
ENSG00000239704	NA	CDRT4	Brain_Amygdala1	gtex	protein_coding	chr17	15389938	15389939	en	0.171323	1.08e-06	-0.295	0.000241	0	17:15020965-17:16411522
ENSG00000090238	NA	YPEL3	Brain_Amygdala1	gtex	protein_coding	chr16	29674631	29674632	en	0.0337362	0.0371973	-0.977	0.000241	0	16:29036613-16:31382470
ENSG00000196378	NA	ZNF34	Brain_Amygdala1	gtex	protein_coding	chr8	146031429	146031430	en	0.0880541	0.000638398	0.934	0.000241	0	8:144236881-8:146303788
ENSG00000261587	NA	TMEM249	Brain_Amygdala1	gtex	protein_coding	chr8	145576085	145576086	en	0.126373	3.56e-05	-0.93	0.00024	0	8:144236881-8:146303788
ENSG00000158023	NA	WDR66	Brain_Amygdala1	gtex	protein_coding	chr12	122355726	122355727	en	0.0668093	0.00310077	0.877	0.000238	0	12:122009763-12:124976982
ENSG00000160781	NA	PAQR6	Brain_Amygdala1	gtex	protein_coding	chr1	156241756	156241757	en	0.0687927	0.00267574	0.694	0.000237	0	1:154770403-1:156336133
ENSG00000170619	NA	COMMD5	Brain_Amygdala1	gtex	protein_coding	chr8	146087890	146087891	en	0.0613467	0.00465499	-0.911	0.000236	0	8:144236881-8:146303788
ENSG00000265519	NA	AC015922.2	Brain_Amygdala1	gtex	lncRNA	chr17	15680124	15680125	en	0.237899	4.56e-09	0.517	0.000233	0	17:15020965-17:16411522
ENSG00000237765	NA	FAM200B	Brain_Amygdala1	gtex	protein_coding	chr4	15677773	15677774	en	0.198038	1.26e-07	3.89	0.000232	0	4:15147446-4:15926136
ENSG00000258144	NA	LINC02406	Brain_Amygdala1	gtex	lncRNA	chr12	39485951	39485952	en	0.0565443	0.00665709	0.89	0.00023	0	12:39227446-12:40816185
ENSG00000180096	NA	SEPTIN1	Brain_Amygdala1	gtex	protein_coding	chr16	30375016	30375017	en	0.128167	3.11e-05	-0.163	0.00023	0	16:29036613-16:31382470
ENSG00000277494	NA	GPIHBP1	Brain_Amygdala1	gtex	protein_coding	chr8	144279439	144279440	en	0.261552	5.88e-10	0.877	0.000229	0	8:144236881-8:146303788
ENSG00000187607	NA	ZNF286A	Brain_Amygdala1	gtex	protein_coding	chr17	15601223	15601224	en	0.0847248	0.000818187	-0.224	0.000229	0	17:15020965-17:16411522
ENSG00000204305	NA	AGER	Brain_Amygdala1	gtex	protein_coding	chr6	32135685	32135686	en	0.0514759	0.00972031	0.859	0.000227	0	6:31571337-6:32682664
ENSG00000104524	NA	PYCR3	Brain_Amygdala1	gtex	protein_coding	chr8	144681250	144681251	en	0.0884435	0.000620126	0.853	0.000225	0	8:144236881-8:146303788
ENSG00000138758	NA	SEPTIN11	Brain_Amygdala1	gtex	protein_coding	chr4	77934404	77934405	en	0.0918469	0.000481036	0.851	0.000224	0	4:77130707-4:79093979
ENSG00000264589	NA	MAPT-AS1	Brain_Amygdala1	gtex	lncRNA	chr17	43936443	43936444	en	0.110245	0.000120996	5.46	0.000222	0	17:43056905-17:45876022
ENSG00000103485	NA	QPRT	Brain_Amygdala1	gtex	protein_coding	chr16	29675566	29675567	en	0.195964	1.5e-07	0.0435	0.000222	0	16:29036613-16:31382470
ENSG00000130783	NA	CCDC62	Brain_Amygdala1	gtex	protein_coding	chr12	122803479	122803480	en	0.073604	0.00187129	-0.18	0.000217	0	12:122009763-12:124976982
ENSG00000255545	NA	AP004608.1	Brain_Amygdala1	gtex	lncRNA	chr11	134208205	134208206	en	0.145293	8.33e-06	-0.816	0.000216	0	11:133000260-11:134205993
ENSG00000254645	NA	AC087379.1	Brain_Amygdala1	gtex	lncRNA	chr11	15756601	15756602	en	0.057258	0.00631209	-0.805	0.000215	0	11:13373433-11:15742397
ENSG00000237188	NA	AC242426.2	Brain_Amygdala1	gtex	lncRNA	chr1	146680150	146680151	en	0.131221	2.46e-05	0.806	0.000215	0	1:144977648-1:148360712
ENSG00000178950	NA	GAK	Brain_Amygdala1	gtex	protein_coding	chr4	860619	860620	en	0.0360377	0.0311798	1.72	0.000212	0	4:695146-4:1478711
ENSG00000131781	NA	FMO5	Brain_Amygdala1	gtex	protein_coding	chr1	146730786	146730787	en	0.0679594	0.0028467	-0.779	0.000211	0	1:144977648-1:148360712
ENSG00000204410	NA	MSH5	Brain_Amygdala1	gtex	protein_coding	chr6	31678466	31678467	en	0.0985981	0.000290331	-0.762	0.00021	0	6:31571337-6:32682664
ENSG00000198952	NA	SMG5	Brain_Amygdala1	gtex	protein_coding	chr1	156645124	156645125	en	0.0511172	0.00998475	0.453	0.000209	0	1:154770403-1:156336133
ENSG00000182196	NA	ARL6IP4	Brain_Amygdala1	gtex	protein_coding	chr12	123469864	123469865	en	0.044307	0.0166497	-0.68	0.000205	0	12:122009763-12:124976982
ENSG00000168778	NA	TCTN2	Brain_Amygdala1	gtex	protein_coding	chr12	124193374	124193375	en	0.153689	4.34e-06	0.667	0.000203	0	12:122009763-12:124976982
ENSG00000117266	NA	CDK18	Brain_Amygdala1	gtex	protein_coding	chr1	205490583	205490584	en	0.0486338	0.0120265	0.622	0.000202	0	1:204681068-1:205922403
ENSG00000163072	NA	NOSTRIN	Brain_Amygdala1	gtex	protein_coding	chr2	169679783	169679784	en	0.0500956	0.0107784	-0.727	0.000202	0	2:167356254-2:169968112
ENSG00000255050	NA	AC067930.4	Brain_Amygdala1	gtex	lncRNA	chr8	144670101	144670102	en	0.119257	6.12e-05	0.68	0.000197	0	8:144236881-8:146303788
ENSG00000196189	NA	SEMA4A	Brain_Amygdala1	gtex	protein_coding	chr1	156140416	156140417	en	0.0508933	0.0101535	-0.441	0.000196	0	1:154770403-1:156336133
ENSG00000255224	NA	AC109322.1	Brain_Amygdala1	gtex	lncRNA	chr8	145121898	145121899	en	0.0706909	0.00232366	0.664	0.000195	0	8:144236881-8:146303788
ENSG00000148925	NA	BTBD10	Brain_Amygdala1	gtex	protein_coding	chr11	13451350	13451351	en	0.030206	0.0488639	0.67	0.000195	0	11:13373433-11:15742397
ENSG00000133818	NA	RRAS2	Brain_Amygdala1	gtex	protein_coding	chr11	14342640	14342641	en	0.081368	0.00105049	0.67	0.000195	0	11:13373433-11:15742397
ENSG00000114770	NA	ABCC5	Brain_Amygdala1	gtex	protein_coding	chr3	183698878	183698879	en	0.206648	6.25e-08	0.656	0.000193	0	3:181511166-3:183769683
ENSG00000049167	NA	ERCC8	Brain_Amygdala1	gtex	protein_coding	chr5	60196844	60196845	en	0.0680924	0.00281869	0.659	0.000193	0	5:58524622-5:60935451
ENSG00000204241	NA	LINC02731	Brain_Amygdala1	gtex	lncRNA	chr11	133900268	133900269	en	0.258507	7.68e-10	0.657	0.000193	0	11:133000260-11:134205993
ENSG00000163684	NA	RPP14	Brain_Amygdala1	gtex	protein_coding	chr3	58292258	58292259	en	0.0345938	0.0348259	-0.643	0.000192	0	3:58157850-3:60272829
ENSG00000267198	NA	AC091132.4	Brain_Amygdala1	gtex	lncRNA	chr17	43417172	43417173	en	0.16714	1.51e-06	-2.26	0.000191	0	17:43056905-17:45876022
ENSG00000256092	NA	SBNO1-AS1	Brain_Amygdala1	gtex	lncRNA	chr12	123848790	123848791	en	0.151007	5.34e-06	0.555	0.00019	0	12:122009763-12:124976982
ENSG00000198535	NA	C2CD4A	Brain_Amygdala1	gtex	protein_coding	chr15	62371456	62371457	en	0.0493515	0.0113964	-0.602	0.000187	0	15:61266132-15:63215222
ENSG00000147813	NA	NAPRT	Brain_Amygdala1	gtex	protein_coding	chr8	144632780	144632781	en	0.495041	1.43e-20	0.594	0.000187	0	8:144236881-8:146303788
ENSG00000163468	NA	CCT3	Brain_Amygdala1	gtex	protein_coding	chr1	156281875	156281876	en	0.0387877	0.0252824	-0.173	0.000186	0	1:154770403-1:156336133
ENSG00000198715	NA	GLMP	Brain_Amygdala1	gtex	protein_coding	chr1	156261340	156261341	en	0.0848316	0.000811699	-0.178	0.000186	0	1:154770403-1:156336133
ENSG00000213722	NA	DDAH2	Brain_Amygdala1	gtex	protein_coding	chr6	31683989	31683990	en	0.0637172	0.00390231	0.567	0.000185	0	6:31571337-6:32682664
ENSG00000212694	NA	LINC01089	Brain_Amygdala1	gtex	lncRNA	chr12	122240096	122240097	en	0.10735	0.000150488	-0.465	0.000182	0	12:122009763-12:124976982
ENSG00000231852	NA	CYP21A2	Brain_Amygdala1	gtex	protein_coding	chr6	32010072	32010073	en	0.15746	3.23e-06	-0.491	0.000179	0	6:31571337-6:32682664
ENSG00000274029	NA	AC069209.1	Brain_Amygdala1	gtex	lncRNA	chr12	121607547	121607548	en	0.0967903	0.000332415	-0.395	0.000178	0	12:122009763-12:124976982
ENSG00000111364	NA	DDX55	Brain_Amygdala1	gtex	protein_coding	chr12	124066621	124066622	en	0.241571	3.33e-09	-0.4	0.000178	0	12:122009763-12:124976982
ENSG00000179526	NA	SHARPIN	Brain_Amygdala1	gtex	protein_coding	chr8	145178085	145178086	en	0.0480256	0.0125879	-0.498	0.000178	0	8:144236881-8:146303788
ENSG00000233885	NA	YEATS2-AS1	Brain_Amygdala1	gtex	lncRNA	chr3	183548125	183548126	en	0.40595	4.76e-16	-0.518	0.000178	0	3:181511166-3:183769683
ENSG00000179698	NA	WDR97	Brain_Amygdala1	gtex	protein_coding	chr8	145119471	145119472	en	0.396583	1.3e-15	0.491	0.000177	0	8:144236881-8:146303788
ENSG00000254973	NA	AC105219.4	Brain_Amygdala1	gtex	lncRNA	chr8	144844585	144844586	en	0.072352	0.00205378	0.462	0.000175	0	8:144236881-8:146303788
ENSG00000071894	NA	CPSF1	Brain_Amygdala1	gtex	protein_coding	chr8	145628015	145628016	en	0.646281	1.91e-30	-0.447	0.000174	0	8:144236881-8:146303788
ENSG00000181097	NA	AC105219.1	Brain_Amygdala1	gtex	lncRNA	chr8	144768339	144768340	en	0.098337	0.000296064	0.44	0.000173	0	8:144236881-8:146303788
ENSG00000198502	NA	HLA-DRB5	Brain_Amygdala1	gtex	protein_coding	chr6	32492876	32492877	en	0.639871	6.02e-30	0.435	0.000173	0	6:31571337-6:32682664
ENSG00000188026	NA	RILPL1	Brain_Amygdala1	gtex	protein_coding	chr12	124025502	124025503	en	0.0536295	0.00827486	-0.301	0.000173	0	12:122009763-12:124976982
ENSG00000213563	NA	C8orf82	Brain_Amygdala1	gtex	protein_coding	chr8	145745803	145745804	en	0.0424322	0.0191803	0.425	0.000172	0	8:144236881-8:146303788
ENSG00000259251	NA	AC104590.1	Brain_Amygdala1	gtex	lncRNA	chr15	62315876	62315877	en	0.174059	8.72e-07	0.416	0.00017	0	15:61266132-15:63215222
ENSG00000272172	NA	AC138696.2	Brain_Amygdala1	gtex	lncRNA	chr8	144384973	144384974	en	0.0888342	0.000602317	-0.375	0.000169	0	8:144236881-8:146303788
ENSG00000167700	NA	MFSD3	Brain_Amygdala1	gtex	protein_coding	chr8	145764281	145764282	en	0.0342162	0.0358503	0.361	0.000168	0	8:144236881-8:146303788
ENSG00000167653	NA	PSCA	Brain_Amygdala1	gtex	protein_coding	chr8	143831546	143831547	en	0.204555	7.42e-08	0.344	0.000167	0	8:144236881-8:146303788
ENSG00000197363	NA	ZNF517	Brain_Amygdala1	gtex	protein_coding	chr8	146045502	146045503	en	0.217227	2.6e-08	-0.34	0.000167	0	8:144236881-8:146303788
ENSG00000147804	NA	SLC39A4	Brain_Amygdala1	gtex	protein_coding	chr8	145606894	145606895	en	0.078355	0.00131443	0.331	0.000166	0	8:144236881-8:146303788
ENSG00000204438	NA	GPANK1	Brain_Amygdala1	gtex	protein_coding	chr6	31658130	31658131	en	0.0367367	0.0295582	-0.273	0.000165	0	6:31571337-6:32682664
ENSG00000198791	NA	CNOT7	Brain_Amygdala1	gtex	protein_coding	chr8	17100282	17100283	en	0.0642732	0.00374423	-0.304	0.000164	0	8:15991660-8:17387624
ENSG00000104518	NA	GSDMD	Brain_Amygdala1	gtex	protein_coding	chr8	144626409	144626410	en	0.330374	1.06e-12	0.267	0.000163	0	8:144236881-8:146303788
ENSG00000160948	NA	VPS28	Brain_Amygdala1	gtex	protein_coding	chr8	145613178	145613179	en	0.224066	1.47e-08	-0.255	0.000163	0	8:144236881-8:146303788
ENSG00000138767	NA	CNOT6L	Brain_Amygdala1	gtex	protein_coding	chr4	78707282	78707283	en	0.0961813	0.000347914	0.237	0.000162	0	4:77130707-4:79093979
ENSG00000179950	NA	PUF60	Brain_Amygdala1	gtex	protein_coding	chr8	144901696	144901697	en	0.0976556	0.000311565	0.229	0.000162	0	8:144236881-8:146303788
ENSG00000166105	NA	GLB1L3	Brain_Amygdala1	gtex	protein_coding	chr11	134142411	134142412	en	0.0582122	0.00587881	0.234	0.000161	0	11:133000260-11:134205993
ENSG00000204428	NA	LY6G5C	Brain_Amygdala1	gtex	protein_coding	chr6	31663890	31663891	en	0.291384	4.08e-11	0.182	0.000161	0	6:31571337-6:32682664
ENSG00000118804	NA	STBD1	Brain_Amygdala1	gtex	protein_coding	chr4	77206491	77206492	en	0.313132	5.44e-12	0.21	0.000161	0	4:77130707-4:79093979
ENSG00000188092	NA	GPR89B	Brain_Amygdala1	gtex	protein_coding	chr1	147366667	147366668	en	0.0368369	0.0293332	-0.212	0.00016	0	1:144977648-1:148360712
ENSG00000253716	NA	MINCR	Brain_Amygdala1	gtex	lncRNA	chr8	144368668	144368669	en	0.331489	9.48e-13	-0.172	0.00016	0	8:144236881-8:146303788
ENSG00000163686	NA	ABHD6	Brain_Amygdala1	gtex	protein_coding	chr3	58272095	58272096	en	0.0974005	0.000317571	-0.104	0.000158	0	3:58157850-3:60272829
ENSG00000272824	NA	AC245100.6	Brain_Amygdala1	gtex	lncRNA	chr1	147782949	147782950	en	0.0534099	0.0084117	-0.128	0.000158	0	1:144977648-1:148360712
ENSG00000204839	NA	MROH6	Brain_Amygdala1	gtex	protein_coding	chr8	144661234	144661235	en	0.133076	2.13e-05	-0.0918	0.000158	0	8:144236881-8:146303788
ENSG00000185730	NA	ZNF696	Brain_Amygdala1	gtex	protein_coding	chr8	144410798	144410799	en	0.0819537	0.00100568	-0.0973	0.000158	0	8:144236881-8:146303788
ENSG00000224481	NA	AC245100.1	Brain_Amygdala1	gtex	lncRNA	chr1	147778210	147778211	en	0.0815688	0.00103491	0.0504	0.000157	0	1:144977648-1:148360712
ENSG00000265491	NA	RNF115	Brain_Amygdala1	gtex	protein_coding	chr1	146495577	146495578	en	0.0359173	0.0314682	0.0601	0.000157	0	1:144977648-1:148360712
ENSG00000003989	NA	SLC7A2	Brain_Amygdala1	gtex	protein_coding	chr8	17373716	17373717	en	0.0440052	0.0170329	-0.105	0.000157	0	8:15991660-8:17387624
ENSG00000141295	NA	SCRN2	Brain_Amygdala1	gtex	protein_coding	chr17	45901750	45901751	en	0.202097	9.07e-08	-0.634	0.000149	0	17:43056905-17:45876022
ENSG00000233175	NA	AC008105.1	Brain_Amygdala1	gtex	lncRNA	chr17	43300185	43300186	en	0.434355	2.05e-17	1.59	0.000144	0	17:43056905-17:45876022
ENSG00000262879	NA	AC005670.3	Brain_Amygdala1	gtex	lncRNA	chr17	45132925	45132926	en	0.422643	7.65e-17	-0.701	0.000131	0	17:43056905-17:45876022
ENSG00000264920	NA	AC018521.5	Brain_Amygdala1	gtex	lncRNA	chr17	45958843	45958844	en	0.216748	2.71e-08	0.0987	0.00013	0	17:43056905-17:45876022
ENSG00000181513	NA	ACBD4	Brain_Amygdala1	gtex	protein_coding	chr17	43167895	43167896	en	0.100898	0.00024436	0.508	0.00013	0	17:43056905-17:45876022
ENSG00000108433	NA	GOSR2	Brain_Amygdala1	gtex	protein_coding	chr17	45020250	45020251	en	0.0506316	0.0103544	-1.47	0.00013	0	17:43056905-17:45876022
ENSG00000169026	NA	SLC49A3	Brain_Amygdala1	gtex	protein_coding	chr4	686766	686767	en	0.100074	0.00025994	-0.37	0.000126	0	4:695146-4:1478711
ENSG00000090316	NA	MAEA	Brain_Amygdala1	gtex	protein_coding	chr4	1289854	1289855	en	0.0813796	0.00104958	0.876	0.000111	0	4:695146-4:1478711
ENSG00000159692	NA	CTBP1	Brain_Amygdala1	gtex	protein_coding	chr4	1205156	1205157	en	0.0626137	0.00423616	-0.000444	0.000104	0	4:695146-4:1478711
ENSG00000249592	NA	AC139887.2	Brain_Amygdala1	gtex	lncRNA	chr4	770496	770497	en	0.039551	0.0238578	-0.396	0.000101	0	4:695146-4:1478711
ENSG00000196810	NA	CTBP1-DT	Brain_Amygdala1	gtex	lncRNA	chr4	1243877	1243878	en	0.0391102	0.0246701	0.746	9.7e-05	0	4:695146-4:1478711
ENSG00000163945	NA	UVSSA	Brain_Amygdala1	gtex	protein_coding	chr4	1330740	1330741	en	0.250611	1.53e-09	-0.299	9.65e-05	0	4:695146-4:1478711
ENSG00000004468	NA	CD38	Brain_Anterior_cingulate_cortex_BA241	gtex	protein_coding	chr4	16000574	16000575	en	0.104741	6.37e-05	-7.5	1	0	4:15147446-4:15926136
ENSG00000127415	NA	IDUA	Brain_Anterior_cingulate_cortex_BA241	gtex	protein_coding	chr4	943532	943533	en	0.0341253	0.0250955	-7.11	1	0	4:695146-4:1478711
ENSG00000138722	NA	MMRN1	Brain_Anterior_cingulate_cortex_BA241	gtex	protein_coding	chr4	90838580	90838581	en	0.278918	6.23e-12	5.78	1	1	4:90231746-4:91560677
ENSG00000117280	NA	RAB29	Brain_Anterior_cingulate_cortex_BA241	gtex	protein_coding	chr1	205745384	205745385	en	0.116051	2.42e-05	6.49	1	0	1:204681068-1:205922403
ENSG00000138750	NA	NUP54	Brain_Anterior_cingulate_cortex_BA241	gtex	protein_coding	chr4	77047941	77047942	en	0.214078	3.63e-09	-4.5	0.961	1	4:77130707-4:79093979
ENSG00000189157	NA	FAM47E	Brain_Anterior_cingulate_cortex_BA241	gtex	protein_coding	chr4	77163941	77163942	en	0.372018	2.41e-16	-4.11	0.903	0	4:77130707-4:79093979
ENSG00000228696	NA	ARL17B	Brain_Anterior_cingulate_cortex_BA241	gtex	protein_coding	chr17	44373721	44373722	en	0.415774	1.21e-18	-8.87	0.672	1	17:43056905-17:45876022
ENSG00000230658	NA	KLHL7-DT	Brain_Anterior_cingulate_cortex_BA241	gtex	lncRNA	chr7	23136276	23136277	en	0.589979	7.27e-30	-5.09	0.634	1	7:22508611-7:23469560
ENSG00000152128	NA	TMEM163	Brain_Anterior_cingulate_cortex_BA241	gtex	protein_coding	chr2	135415516	135415517	en	0.0340312	0.0253003	4.31	0.573	1	2:135159453-2:137042794
ENSG00000011295	NA	TTC19	Brain_Anterior_cingulate_cortex_BA241	gtex	protein_coding	chr17	15947248	15947249	en	0.0345221	0.0242499	-5.03	0.558	1	17:15020965-17:16411522
ENSG00000196118	NA	CCDC189	Brain_Anterior_cingulate_cortex_BA241	gtex	protein_coding	chr16	30793318	30793319	en	0.0914856	0.000196479	5.3	0.466	1	16:29036613-16:31382470
ENSG00000169242	NA	EFNA1	Brain_Anterior_cingulate_cortex_BA241	gtex	protein_coding	chr1	155115897	155115898	en	0.0274835	0.0447772	4.18	0.442	0	1:154770403-1:156336133
ENSG00000136243	NA	NUPL2	Brain_Anterior_cingulate_cortex_BA241	gtex	protein_coding	chr7	23262952	23262953	en	0.340283	8.96e-15	4.97	0.353	0	7:22508611-7:23469560
ENSG00000176681	NA	LRRC37A	Brain_Anterior_cingulate_cortex_BA241	gtex	protein_coding	chr17	44387998	44387999	en	0.610701	1.66e-31	-8.77	0.294	0	17:43056905-17:45876022
ENSG00000275413	NA	AC002553.2	Brain_Anterior_cingulate_cortex_BA241	gtex	lncRNA	chr17	15946160	15946161	en	0.0371628	0.0193185	-4.88	0.268	1	17:15020965-17:16411522
ENSG00000103496	NA	STX4	Brain_Anterior_cingulate_cortex_BA241	gtex	protein_coding	chr16	31011183	31011184	en	0.151061	1.15e-06	5.16	0.229	1	16:29036613-16:31382470
ENSG00000232748	NA	AC135050.1	Brain_Anterior_cingulate_cortex_BA241	gtex	lncRNA	chr16	31128847	31128848	en	0.06181	0.00239421	5.13	0.199	1	16:29036613-16:31382470
ENSG00000184445	NA	KNTC1	Brain_Anterior_cingulate_cortex_BA241	gtex	protein_coding	chr12	123062298	123062299	en	0.0929518	0.000173541	-3.83	0.169	0	12:122009763-12:124976982
ENSG00000247775	NA	SNCA-AS1	Brain_Anterior_cingulate_cortex_BA241	gtex	lncRNA	chr4	90766438	90766439	en	0.125954	1.03e-05	2.19	0.12	0	4:90231746-4:91560677
ENSG00000107651	NA	SEC23IP	Brain_Anterior_cingulate_cortex_BA241	gtex	protein_coding	chr10	121694900	121694901	en	0.0853723	0.000329404	3.68	0.104	0	10:120591693-10:122407323
ENSG00000170425	NA	ADORA2B	Brain_Anterior_cingulate_cortex_BA241	gtex	protein_coding	chr17	15847615	15847616	en	0.110703	3.83e-05	4.65	0.0921	0	17:15020965-17:16411522
ENSG00000214941	NA	ZSWIM7	Brain_Anterior_cingulate_cortex_BA241	gtex	protein_coding	chr17	15895077	15895078	en	0.544613	1.52e-26	4.58	0.0701	0	17:15020965-17:16411522
ENSG00000234745	NA	HLA-B	Brain_Anterior_cingulate_cortex_BA241	gtex	protein_coding	chr6	31511563	31511564	en	0.172041	1.76e-07	3.49	0.0564	0	6:31571337-6:32682664
ENSG00000260911	NA	AC135050.3	Brain_Anterior_cingulate_cortex_BA241	gtex	lncRNA	chr16	31053245	31053246	en	0.146948	1.65e-06	-4.85	0.0516	0	16:29036613-16:31382470
ENSG00000103510	NA	KAT8	Brain_Anterior_cingulate_cortex_BA241	gtex	protein_coding	chr16	31141184	31141185	en	0.180977	7.82e-08	-4.76	0.0352	0	16:29036613-16:31382470
ENSG00000214401	NA	KANSL1-AS1	Brain_Anterior_cingulate_cortex_BA241	gtex	lncRNA	chr17	44276912	44276913	en	0.585371	1.64e-29	-8.51	0.0346	0	17:43056905-17:45876022
ENSG00000156858	NA	PRR14	Brain_Anterior_cingulate_cortex_BA241	gtex	protein_coding	chr16	30659551	30659552	en	0.0607073	0.00262697	4.65	0.024	0	16:29036613-16:31382470
ENSG00000177234	NA	LINC01561	Brain_Anterior_cingulate_cortex_BA241	gtex	lncRNA	chr10	122355953	122355954	en	0.0478219	0.00779009	-3.07	0.015	0	10:120591693-10:122407323
ENSG00000178222	NA	RNF212	Brain_Anterior_cingulate_cortex_BA241	gtex	protein_coding	chr4	1254888	1254889	en	0.121464	1.52e-05	2.7	0.0127	0	4:695146-4:1478711
ENSG00000167397	NA	VKORC1	Brain_Anterior_cingulate_cortex_BA241	gtex	protein_coding	chr16	31105554	31105555	en	0.0365181	0.0204189	4.33	0.011	0	16:29036613-16:31382470
ENSG00000179195	NA	ZNF664	Brain_Anterior_cingulate_cortex_BA241	gtex	protein_coding	chr12	124479446	124479447	en	0.0591766	0.00298817	-2.75	0.00703	0	12:122009763-12:124976982
ENSG00000274678	NA	AC106886.3	Brain_Anterior_cingulate_cortex_BA241	gtex	lncRNA	chr16	30857286	30857287	en	0.0308852	0.0332405	-4.24	0.0058	0	16:29036613-16:31382470
ENSG00000232759	NA	AC002480.1	Brain_Anterior_cingulate_cortex_BA241	gtex	lncRNA	chr7	22636563	22636564	en	0.0963621	0.000129972	-2.92	0.00571	0	7:22508611-7:23469560
ENSG00000226816	NA	AC005082.1	Brain_Anterior_cingulate_cortex_BA241	gtex	lncRNA	chr7	23265331	23265332	en	0.0594997	0.002908	-2.68	0.00529	0	7:22508611-7:23469560
ENSG00000174792	NA	ODAPH	Brain_Anterior_cingulate_cortex_BA241	gtex	protein_coding	chr4	76575974	76575975	en	0.13237	5.91e-06	-3.28	0.00351	0	4:77130707-4:79093979
ENSG00000178950	NA	GAK	Brain_Anterior_cingulate_cortex_BA241	gtex	protein_coding	chr4	884489	884490	en	0.112279	3.35e-05	5.55	0.00281	0	4:695146-4:1478711
ENSG00000188906	NA	LRRK2	Brain_Anterior_cingulate_cortex_BA241	gtex	protein_coding	chr12	40487928	40487929	en	0.0331439	0.0273191	2.43	0.00279	0	12:39227446-12:40816185
ENSG00000273493	NA	AC098479.1	Brain_Anterior_cingulate_cortex_BA241	gtex	lncRNA	chr3	58350234	58350235	en	0.050983	0.00596235	2.42	0.00269	0	3:58157850-3:60272829
ENSG00000168291	NA	PDHB	Brain_Anterior_cingulate_cortex_BA241	gtex	protein_coding	chr3	58402467	58402468	en	0.195219	2.12e-08	-2.36	0.00234	0	3:58157850-3:60272829
ENSG00000185619	NA	PCGF3	Brain_Anterior_cingulate_cortex_BA241	gtex	protein_coding	chr4	1148692	1148693	en	0.208542	6.11e-09	-2.62	0.00218	0	4:695146-4:1478711
ENSG00000127418	NA	FGFRL1	Brain_Anterior_cingulate_cortex_BA241	gtex	protein_coding	chr4	1049782	1049783	en	0.0506483	0.00613339	-0.427	0.0021	0	4:695146-4:1478711
ENSG00000250091	NA	DNAH10OS	Brain_Anterior_cingulate_cortex_BA241	gtex	lncRNA	chr12	124437213	124437214	en	0.148638	1.42e-06	2.27	0.00203	0	12:122009763-12:124976982
ENSG00000186834	NA	HEXIM1	Brain_Anterior_cingulate_cortex_BA241	gtex	protein_coding	chr17	43235436	43235437	en	0.0338996	0.0255897	-2.46	0.002	0	17:43056905-17:45876022
ENSG00000183605	NA	SFXN4	Brain_Anterior_cingulate_cortex_BA241	gtex	protein_coding	chr10	120915961	120915962	en	0.610153	1.84e-31	2.24	0.00199	0	10:120591693-10:122407323
ENSG00000082258	NA	CCNT2	Brain_Anterior_cingulate_cortex_BA241	gtex	protein_coding	chr2	135701684	135701685	en	0.119862	1.74e-05	-2.57	0.0019	0	2:135159453-2:137042794
ENSG00000163749	NA	CCDC158	Brain_Anterior_cingulate_cortex_BA241	gtex	protein_coding	chr4	77293065	77293066	en	0.212797	4.1e-09	-3.5	0.00186	0	4:77130707-4:79093979
ENSG00000225190	NA	PLEKHM1	Brain_Anterior_cingulate_cortex_BA241	gtex	protein_coding	chr17	43530675	43530676	en	0.198664	1.54e-08	-7.99	0.0017	0	17:43056905-17:45876022
ENSG00000280789	NA	PAGR1	Brain_Anterior_cingulate_cortex_BA241	gtex	protein_coding	chr16	29878280	29878281	en	0.04442	0.0103961	-2.2	0.00164	0	16:29036613-16:31382470
ENSG00000224043	NA	CCNT2-AS1	Brain_Anterior_cingulate_cortex_BA241	gtex	lncRNA	chr2	135663594	135663595	en	0.0290968	0.0388609	2.5	0.00161	0	2:135159453-2:137042794
ENSG00000119979	NA	DENND10	Brain_Anterior_cingulate_cortex_BA241	gtex	protein_coding	chr10	120850430	120850431	en	0.0792822	0.000550506	-2.08	0.00144	0	10:120591693-10:122407323
ENSG00000204287	NA	HLA-DRA	Brain_Anterior_cingulate_cortex_BA241	gtex	protein_coding	chr6	32431321	32431322	en	0.0784025	0.000592852	2.15	0.00143	0	6:31571337-6:32682664
ENSG00000204256	NA	BRD2	Brain_Anterior_cingulate_cortex_BA241	gtex	protein_coding	chr6	33113100	33113101	en	0.230896	7.3e-10	2.11	0.00134	0	6:31571337-6:32682664
ENSG00000232629	NA	HLA-DQB2	Brain_Anterior_cingulate_cortex_BA241	gtex	protein_coding	chr6	32645843	32645844	en	0.561594	9.54e-28	-2.06	0.00122	0	6:31571337-6:32682664
ENSG00000130787	NA	HIP1R	Brain_Anterior_cingulate_cortex_BA241	gtex	protein_coding	chr12	123322472	123322473	en	0.0783797	0.000593989	-2.02	0.00121	0	12:122009763-12:124976982
ENSG00000273133	NA	AC116651.1	Brain_Anterior_cingulate_cortex_BA241	gtex	lncRNA	chr4	15843834	15843835	en	0.255772	6.41e-11	2	0.00112	0	4:15147446-4:15926136
ENSG00000145217	NA	SLC26A1	Brain_Anterior_cingulate_cortex_BA241	gtex	protein_coding	chr4	972301	972302	en	0.152604	1e-06	2.59	0.00108	0	4:695146-4:1478711
ENSG00000275263	NA	AC135048.3	Brain_Anterior_cingulate_cortex_BA241	gtex	lncRNA	chr16	31358114	31358115	en	0.0470602	0.00830938	3.25	0.00106	0	16:29036613-16:31382470
ENSG00000178226	NA	PRSS36	Brain_Anterior_cingulate_cortex_BA241	gtex	protein_coding	chr16	31164876	31164877	en	0.174416	1.42e-07	-3.73	0.000964	0	16:29036613-16:31382470
ENSG00000242252	NA	BGLAP	Brain_Anterior_cingulate_cortex_BA241	gtex	protein_coding	chr1	156208051	156208052	en	0.140889	2.81e-06	1.97	0.000958	0	1:154770403-1:156336133
ENSG00000240053	NA	LY6G5B	Brain_Anterior_cingulate_cortex_BA241	gtex	protein_coding	chr6	31706489	31706490	en	0.128765	8.08e-06	1.9	0.000937	0	6:31571337-6:32682664
ENSG00000073969	NA	NSF	Brain_Anterior_cingulate_cortex_BA241	gtex	protein_coding	chr17	44711897	44711898	en	0.0296966	0.0368738	-4.2	0.000926	0	17:43056905-17:45876022
ENSG00000151923	NA	TIAL1	Brain_Anterior_cingulate_cortex_BA241	gtex	protein_coding	chr10	120875341	120875342	en	0.0286015	0.0405856	-1.78	0.00089	0	10:120591693-10:122407323
ENSG00000149930	NA	TAOK2	Brain_Anterior_cingulate_cortex_BA241	gtex	protein_coding	chr16	30011863	30011864	en	0.0430789	0.0116519	1.43	0.000876	0	16:29036613-16:31382470
ENSG00000224389	NA	C4B	Brain_Anterior_cingulate_cortex_BA241	gtex	protein_coding	chr6	31996391	31996392	en	0.0755732	0.000752314	-1.85	0.000842	0	6:31571337-6:32682664
ENSG00000203499	NA	IQANK1	Brain_Anterior_cingulate_cortex_BA241	gtex	protein_coding	chr8	144843874	144843875	en	0.145246	1.91e-06	1.84	0.000815	0	8:144236881-8:146303788
ENSG00000204308	NA	RNF5	Brain_Anterior_cingulate_cortex_BA241	gtex	protein_coding	chr6	32151934	32151935	en	0.0333856	0.0267533	-1.75	0.000814	0	6:31571337-6:32682664
ENSG00000160803	NA	UBQLN4	Brain_Anterior_cingulate_cortex_BA241	gtex	protein_coding	chr1	155892391	155892392	en	0.0785786	0.000584122	1.97	0.000778	0	1:154770403-1:156336133
ENSG00000163689	NA	C3orf67	Brain_Anterior_cingulate_cortex_BA241	gtex	protein_coding	chr3	58869170	58869171	en	0.0314602	0.0316177	-1.81	0.00077	0	3:58157850-3:60272829
ENSG00000178209	NA	PLEC	Brain_Anterior_cingulate_cortex_BA241	gtex	protein_coding	chr8	145008788	145008789	en	0.0870724	0.00028535	-1.8	0.000761	0	8:144236881-8:146303788
ENSG00000103549	NA	RNF40	Brain_Anterior_cingulate_cortex_BA241	gtex	protein_coding	chr16	30801496	30801497	en	0.0628183	0.00219951	-3.07	0.000744	0	16:29036613-16:31382470
ENSG00000204351	NA	SKIV2L	Brain_Anterior_cingulate_cortex_BA241	gtex	protein_coding	chr6	31933793	31933794	en	0.294204	1.28e-12	1.73	0.000744	0	6:31571337-6:32682664
ENSG00000272360	NA	AC116036.2	Brain_Anterior_cingulate_cortex_BA241	gtex	lncRNA	chr3	58480169	58480170	en	0.0343131	0.0246915	-1.76	0.000713	0	3:58157850-3:60272829
ENSG00000111328	NA	CDK2AP1	Brain_Anterior_cingulate_cortex_BA241	gtex	protein_coding	chr12	123759876	123759877	en	0.0390141	0.0164835	1.78	0.000704	0	12:122009763-12:124976982
ENSG00000163872	NA	YEATS2	Brain_Anterior_cingulate_cortex_BA241	gtex	protein_coding	chr3	183456634	183456635	en	0.0446938	0.010157	1.73	0.000679	0	3:181511166-3:183769683
ENSG00000204396	NA	VWA7	Brain_Anterior_cingulate_cortex_BA241	gtex	protein_coding	chr6	31729910	31729911	en	0.0856267	0.000322406	-1.64	0.000639	0	6:31571337-6:32682664
ENSG00000234283	NA	LINC01731	Brain_Anterior_cingulate_cortex_BA241	gtex	lncRNA	chr1	147778672	147778673	en	0.127912	8.7e-06	1.68	0.00062	0	1:144977648-1:148360712
ENSG00000167701	NA	GPT	Brain_Anterior_cingulate_cortex_BA241	gtex	protein_coding	chr8	145733371	145733372	en	0.0579677	0.00330832	1.66	0.000607	0	8:144236881-8:146303788
ENSG00000163354	NA	DCST2	Brain_Anterior_cingulate_cortex_BA241	gtex	protein_coding	chr1	154956049	154956050	en	0.193215	2.55e-08	-1.69	0.000606	0	1:154770403-1:156336133
ENSG00000255182	NA	AC084125.2	Brain_Anterior_cingulate_cortex_BA241	gtex	lncRNA	chr8	145750898	145750899	en	0.034299	0.0247216	-1.65	0.000594	0	8:144236881-8:146303788
ENSG00000169288	NA	MRPL1	Brain_Anterior_cingulate_cortex_BA241	gtex	protein_coding	chr4	78829862	78829863	en	0.0486297	0.00727512	1.32	0.000587	0	4:77130707-4:79093979
ENSG00000185499	NA	MUC1	Brain_Anterior_cingulate_cortex_BA241	gtex	protein_coding	chr1	155165034	155165035	en	0.0336369	0.0261778	1.82	0.000582	0	1:154770403-1:156336133
ENSG00000274292	NA	AC084018.2	Brain_Anterior_cingulate_cortex_BA241	gtex	lncRNA	chr12	122210350	122210351	en	0.100424	9.2e-05	-1.6	0.000553	0	12:122009763-12:124976982
ENSG00000156219	NA	ART3	Brain_Anterior_cingulate_cortex_BA241	gtex	protein_coding	chr4	77021761	77021762	en	0.0375984	0.0186096	-0.629	0.000527	0	4:77130707-4:79093979
ENSG00000187607	NA	ZNF286A	Brain_Anterior_cingulate_cortex_BA241	gtex	protein_coding	chr17	15616918	15616919	en	0.11379	2.94e-05	-1.15	0.000521	0	17:15020965-17:16411522
ENSG00000276790	NA	AC068234.3	Brain_Anterior_cingulate_cortex_BA241	gtex	lncRNA	chr17	45415371	45415372	en	0.0817984	0.000445316	1.24	0.000489	0	17:43056905-17:45876022
ENSG00000169955	NA	ZNF747	Brain_Anterior_cingulate_cortex_BA241	gtex	protein_coding	chr16	30570655	30570656	en	0.0505829	0.00616739	-2.73	0.000488	0	16:29036613-16:31382470
ENSG00000108474	NA	PIGL	Brain_Anterior_cingulate_cortex_BA241	gtex	protein_coding	chr17	16584152	16584153	en	0.0393711	0.0159875	2.86	0.000483	0	17:15020965-17:16411522
ENSG00000225914	NA	TSBP1-AS1	Brain_Anterior_cingulate_cortex_BA241	gtex	lncRNA	chr6	32308256	32308257	en	0.152628	9.98e-07	1.52	0.000473	0	6:31571337-6:32682664
ENSG00000196498	NA	NCOR2	Brain_Anterior_cingulate_cortex_BA241	gtex	protein_coding	chr12	125016373	125016374	en	0.0799881	0.00051872	-1.44	0.00046	0	12:122009763-12:124976982
ENSG00000178722	NA	C5orf64	Brain_Anterior_cingulate_cortex_BA241	gtex	lncRNA	chr5	60972496	60972497	en	0.305273	4.01e-13	1.48	0.000457	0	5:58524622-5:60935451
ENSG00000182307	NA	C8orf33	Brain_Anterior_cingulate_cortex_BA241	gtex	protein_coding	chr8	146264840	146264841	en	0.0340027	0.0253627	1.47	0.000449	0	8:144236881-8:146303788
ENSG00000131778	NA	CHD1L	Brain_Anterior_cingulate_cortex_BA241	gtex	protein_coding	chr1	146720992	146720993	en	0.15481	8.22e-07	1.46	0.00044	0	1:144977648-1:148360712
ENSG00000233885	NA	YEATS2-AS1	Brain_Anterior_cingulate_cortex_BA241	gtex	lncRNA	chr3	183679940	183679941	en	0.352187	2.35e-15	-1.45	0.000437	0	3:181511166-3:183769683
ENSG00000278133	NA	AC135050.6	Brain_Anterior_cingulate_cortex_BA241	gtex	lncRNA	chr16	30995044	30995045	en	0.0412323	0.0136374	2.3	0.000428	0	16:29036613-16:31382470
ENSG00000143603	NA	KCNN3	Brain_Anterior_cingulate_cortex_BA241	gtex	protein_coding	chr1	154864554	154864555	en	0.0974684	0.000118323	-1.4	0.000426	0	1:154770403-1:156336133
ENSG00000177335	NA	C8orf31	Brain_Anterior_cingulate_cortex_BA241	gtex	lncRNA	chr8	144149574	144149575	en	0.0497158	0.00663648	-1.41	0.000414	0	8:144236881-8:146303788
ENSG00000139697	NA	SBNO1	Brain_Anterior_cingulate_cortex_BA241	gtex	protein_coding	chr12	123808460	123808461	en	0.0425833	0.012154	1.41	0.00041	0	12:122009763-12:124976982
ENSG00000235560	NA	AC002310.1	Brain_Anterior_cingulate_cortex_BA241	gtex	lncRNA	chr16	30558796	30558797	en	0.118851	1.9e-05	-1.2	0.000407	0	16:29036613-16:31382470
ENSG00000143537	NA	ADAM15	Brain_Anterior_cingulate_cortex_BA241	gtex	protein_coding	chr1	155061311	155061312	en	0.123404	1.28e-05	-1.17	0.000406	0	1:154770403-1:156336133
ENSG00000078070	NA	MCCC1	Brain_Anterior_cingulate_cortex_BA241	gtex	protein_coding	chr3	182801039	182801040	en	0.115767	2.48e-05	-1.39	0.000402	0	3:181511166-3:183769683
ENSG00000163344	NA	PMVK	Brain_Anterior_cingulate_cortex_BA241	gtex	protein_coding	chr1	154845903	154845904	en	0.0293736	0.0379306	1.33	0.000401	0	1:154770403-1:156336133
ENSG00000169203	NA	RP11-231C14.4	Brain_Anterior_cingulate_cortex_BA241	gtex	protein_coding	chr16	29951506	29951507	en	0.105084	6.19e-05	-1.73	0.000395	0	16:29036613-16:31382470
ENSG00000204301	NA	NOTCH4	Brain_Anterior_cingulate_cortex_BA241	gtex	protein_coding	chr6	32200070	32200071	en	0.154025	8.81e-07	1.31	0.000393	0	6:31571337-6:32682664
ENSG00000038945	NA	MSR1	Brain_Anterior_cingulate_cortex_BA241	gtex	protein_coding	chr8	16049227	16049228	en	0.0273388	0.0453517	1.37	0.000392	0	8:15991660-8:17387624
ENSG00000174529	NA	TMEM81	Brain_Anterior_cingulate_cortex_BA241	gtex	protein_coding	chr1	205069737	205069738	en	0.0628438	0.0021948	1.61	0.00039	0	1:204681068-1:205922403
ENSG00000233002	NA	AC005324.1	Brain_Anterior_cingulate_cortex_BA241	gtex	lncRNA	chr17	15625467	15625468	en	0.273753	1.05e-11	-1.05	0.000386	0	17:15020965-17:16411522
ENSG00000118804	NA	STBD1	Brain_Anterior_cingulate_cortex_BA241	gtex	protein_coding	chr4	77207241	77207242	en	0.16168	4.46e-07	1.67	0.000378	0	4:77130707-4:79093979
ENSG00000114796	NA	KLHL24	Brain_Anterior_cingulate_cortex_BA241	gtex	protein_coding	chr3	183416864	183416865	en	0.0770594	0.000663841	-1.34	0.000376	0	3:181511166-3:183769683
ENSG00000076003	NA	MCM6	Brain_Anterior_cingulate_cortex_BA241	gtex	protein_coding	chr2	136588728	136588729	en	0.0404307	0.0146031	0.322	0.000374	0	2:135159453-2:137042794
ENSG00000261416	NA	AC012645.3	Brain_Anterior_cingulate_cortex_BA241	gtex	lncRNA	chr16	30146099	30146100	en	0.0283106	0.0416353	-1.27	0.000371	0	16:29036613-16:31382470
ENSG00000111325	NA	OGFOD2	Brain_Anterior_cingulate_cortex_BA241	gtex	protein_coding	chr12	123521238	123521239	en	0.0865041	0.000299382	-1.32	0.000368	0	12:122009763-12:124976982
ENSG00000237765	NA	FAM200B	Brain_Anterior_cingulate_cortex_BA241	gtex	protein_coding	chr4	15688490	15688491	en	0.344878	5.37e-15	4.07	0.000357	0	4:15147446-4:15926136
ENSG00000180921	NA	FAM83H	Brain_Anterior_cingulate_cortex_BA241	gtex	protein_coding	chr8	144817015	144817016	en	0.238146	3.62e-10	1.29	0.000354	0	8:144236881-8:146303788
ENSG00000162836	NA	ACP6	Brain_Anterior_cingulate_cortex_BA241	gtex	protein_coding	chr1	147105423	147105424	en	0.542396	2.17e-26	1.27	0.000343	0	1:144977648-1:148360712
ENSG00000176953	NA	NFATC2IP	Brain_Anterior_cingulate_cortex_BA241	gtex	protein_coding	chr16	28958300	28958301	en	0.0791939	0.000554618	0.861	0.000343	0	16:29036613-16:31382470
ENSG00000198502	NA	HLA-DRB5	Brain_Anterior_cingulate_cortex_BA241	gtex	protein_coding	chr6	32492876	32492877	en	0.550509	5.89e-27	1.25	0.000334	0	6:31571337-6:32682664
ENSG00000212694	NA	LINC01089	Brain_Anterior_cingulate_cortex_BA241	gtex	lncRNA	chr12	122250638	122250639	en	0.0991855	0.000102265	-1.21	0.000332	0	12:122009763-12:124976982
ENSG00000237541	NA	HLA-DQA2	Brain_Anterior_cingulate_cortex_BA241	gtex	protein_coding	chr6	32613597	32613598	en	0.469107	1.11e-21	-1.16	0.000331	0	6:31571337-6:32682664
ENSG00000035499	NA	DEPDC1B	Brain_Anterior_cingulate_cortex_BA241	gtex	protein_coding	chr5	60071266	60071267	en	0.0312028	0.0323337	1.24	0.000329	0	5:58524622-5:60935451
ENSG00000278811	NA	LINC00624	Brain_Anterior_cingulate_cortex_BA241	gtex	lncRNA	chr1	146756759	146756760	en	0.0834341	0.000387937	1.22	0.000322	0	1:144977648-1:148360712
ENSG00000260428	NA	SCX	Brain_Anterior_cingulate_cortex_BA241	gtex	protein_coding	chr8	145269214	145269215	en	0.0355813	0.0221332	1.2	0.000321	0	8:144236881-8:146303788
ENSG00000180096	NA	SEPTIN1	Brain_Anterior_cingulate_cortex_BA241	gtex	protein_coding	chr16	30418980	30418981	en	0.163991	3.63e-07	-0.618	0.00032	0	16:29036613-16:31382470
ENSG00000159674	NA	SPON2	Brain_Anterior_cingulate_cortex_BA241	gtex	protein_coding	chr4	1165366	1165367	en	0.19365	2.45e-08	-1.51	0.000317	0	4:695146-4:1478711
ENSG00000102882	NA	MAPK3	Brain_Anterior_cingulate_cortex_BA241	gtex	protein_coding	chr16	30160480	30160481	en	0.11851	1.96e-05	-0.66	0.000316	0	16:29036613-16:31382470
ENSG00000185477	NA	GPRIN3	Brain_Anterior_cingulate_cortex_BA241	gtex	protein_coding	chr4	90151159	90151160	en	0.126861	9.53e-06	-0.857	0.000314	0	4:90231746-4:91560677
ENSG00000272849	NA	AC084018.1	Brain_Anterior_cingulate_cortex_BA241	gtex	lncRNA	chr12	122260285	122260286	en	0.0787396	0.000576254	-1.13	0.000311	0	12:122009763-12:124976982
ENSG00000168297	NA	PXK	Brain_Anterior_cingulate_cortex_BA241	gtex	protein_coding	chr3	58364349	58364350	en	0.0296153	0.0371368	-1.18	0.000309	0	3:58157850-3:60272829
ENSG00000235663	NA	SAPCD1-AS1	Brain_Anterior_cingulate_cortex_BA241	gtex	lncRNA	chr6	31743412	31743413	en	0.0346751	0.0239318	-1.11	0.000304	0	6:31571337-6:32682664
ENSG00000138758	NA	SEPTIN11	Brain_Anterior_cingulate_cortex_BA241	gtex	protein_coding	chr4	77930579	77930580	en	0.256541	5.94e-11	0.674	0.000301	0	4:77130707-4:79093979
ENSG00000260304	NA	AC009088.2	Brain_Anterior_cingulate_cortex_BA241	gtex	lncRNA	chr16	31200471	31200472	en	0.0702	0.00118228	2.13	0.0003	0	16:29036613-16:31382470
ENSG00000161016	NA	RPL8	Brain_Anterior_cingulate_cortex_BA241	gtex	protein_coding	chr8	146014113	146014114	en	0.0673425	0.00150343	-1.14	0.000298	0	8:144236881-8:146303788
ENSG00000177238	NA	TRIM72	Brain_Anterior_cingulate_cortex_BA241	gtex	protein_coding	chr16	31223334	31223335	en	0.106716	5.38e-05	1.63	0.000298	0	16:29036613-16:31382470
ENSG00000139719	NA	VPS33A	Brain_Anterior_cingulate_cortex_BA241	gtex	protein_coding	chr12	122716211	122716212	en	0.075944	0.000729198	-1.13	0.000295	0	12:122009763-12:124976982
ENSG00000183955	NA	KMT5A	Brain_Anterior_cingulate_cortex_BA241	gtex	protein_coding	chr12	123888740	123888741	en	0.0927503	0.000176528	1.07	0.000294	0	12:122009763-12:124976982
ENSG00000102886	NA	GDPD3	Brain_Anterior_cingulate_cortex_BA241	gtex	protein_coding	chr16	30123555	30123556	en	0.0781144	0.000607409	-0.911	0.000285	0	16:29036613-16:31382470
ENSG00000250616	NA	AC012645.1	Brain_Anterior_cingulate_cortex_BA241	gtex	lncRNA	chr16	30102876	30102877	en	0.0359038	0.021527	1.22	0.000281	0	16:29036613-16:31382470
ENSG00000204305	NA	AGER	Brain_Anterior_cingulate_cortex_BA241	gtex	protein_coding	chr6	31973762	31973763	en	0.0457134	0.00931476	-0.913	0.000279	0	6:31571337-6:32682664
ENSG00000133069	NA	TMCC2	Brain_Anterior_cingulate_cortex_BA241	gtex	protein_coding	chr1	205238783	205238784	en	0.058332	0.00320837	0.942	0.000277	0	1:204681068-1:205922403
ENSG00000277494	NA	GPIHBP1	Brain_Anterior_cingulate_cortex_BA241	gtex	protein_coding	chr8	144275228	144275229	en	0.171303	1.88e-07	1.06	0.000272	0	8:144236881-8:146303788
ENSG00000103472	NA	RRN3P2	Brain_Anterior_cingulate_cortex_BA241	gtex	lncRNA	chr16	29117128	29117129	en	0.187126	4.46e-08	0.522	0.000266	0	16:29036613-16:31382470
ENSG00000225855	NA	RUSC1-AS1	Brain_Anterior_cingulate_cortex_BA241	gtex	lncRNA	chr1	155284855	155284856	en	0.122428	1.4e-05	-0.814	0.000265	0	1:154770403-1:156336133
ENSG00000149922	NA	TBX6	Brain_Anterior_cingulate_cortex_BA241	gtex	protein_coding	chr16	30114959	30114960	en	0.218929	2.29e-09	1.14	0.000265	0	16:29036613-16:31382470
ENSG00000125409	NA	TEKT3	Brain_Anterior_cingulate_cortex_BA241	gtex	protein_coding	chr17	15245772	15245773	en	0.158438	5.95e-07	0.363	0.000265	0	17:15020965-17:16411522
ENSG00000122591	NA	FAM126A	Brain_Anterior_cingulate_cortex_BA241	gtex	protein_coding	chr7	23310130	23310131	en	0.0297363	0.0367461	-0.535	0.000264	0	7:22508611-7:23469560
ENSG00000133818	NA	RRAS2	Brain_Anterior_cingulate_cortex_BA241	gtex	protein_coding	chr11	14331733	14331734	en	0.129223	7.76e-06	1.03	0.000264	0	11:13373433-11:15742397
ENSG00000260953	NA	AC009093.4	Brain_Anterior_cingulate_cortex_BA241	gtex	lncRNA	chr16	29279228	29279229	en	0.316174	1.25e-13	0.514	0.000263	0	16:29036613-16:31382470
ENSG00000175106	NA	TVP23C	Brain_Anterior_cingulate_cortex_BA241	gtex	protein_coding	chr17	15407452	15407453	en	0.0763796	0.000702945	-0.749	0.000263	0	17:15020965-17:16411522
ENSG00000114770	NA	ABCC5	Brain_Anterior_cingulate_cortex_BA241	gtex	protein_coding	chr3	183638182	183638183	en	0.107617	4.99e-05	1.02	0.000261	0	3:181511166-3:183769683
ENSG00000048342	NA	CC2D2A	Brain_Anterior_cingulate_cortex_BA241	gtex	protein_coding	chr4	15942534	15942535	en	0.0930497	0.000172109	1.03	0.000261	0	4:15147446-4:15926136
ENSG00000197858	NA	GPAA1	Brain_Anterior_cingulate_cortex_BA241	gtex	protein_coding	chr8	145128458	145128459	en	0.103372	7.16e-05	-1.01	0.000261	0	8:144236881-8:146303788
ENSG00000187688	NA	TRPV2	Brain_Anterior_cingulate_cortex_BA241	gtex	protein_coding	chr17	16365744	16365745	en	0.482586	1.69e-22	-1.72	0.000257	0	17:15020965-17:16411522
ENSG00000181135	NA	ZNF707	Brain_Anterior_cingulate_cortex_BA241	gtex	protein_coding	chr8	144962683	144962684	en	0.0767911	0.00067901	-1	0.000257	0	8:144236881-8:146303788
ENSG00000169900	NA	PYDC1	Brain_Anterior_cingulate_cortex_BA241	gtex	protein_coding	chr16	31236471	31236472	en	0.0835744	0.000383373	-1.02	0.000255	0	16:29036613-16:31382470
ENSG00000275371	NA	AC012645.4	Brain_Anterior_cingulate_cortex_BA241	gtex	lncRNA	chr16	30117774	30117775	en	0.0845069	0.000354363	-0.607	0.000252	0	16:29036613-16:31382470
ENSG00000244731	NA	C4A	Brain_Anterior_cingulate_cortex_BA241	gtex	protein_coding	chr6	31959723	31959724	en	0.219757	2.12e-09	-0.947	0.00025	0	6:31571337-6:32682664
ENSG00000239704	NA	CDRT4	Brain_Anterior_cingulate_cortex_BA241	gtex	protein_coding	chr17	15406661	15406662	en	0.149684	1.29e-06	-0.522	0.000248	0	17:15020965-17:16411522
ENSG00000261587	NA	TMEM249	Brain_Anterior_cingulate_cortex_BA241	gtex	protein_coding	chr8	145593018	145593019	en	0.0788073	0.000572978	-0.963	0.000248	0	8:144236881-8:146303788
ENSG00000138767	NA	CNOT6L	Brain_Anterior_cingulate_cortex_BA241	gtex	protein_coding	chr4	78707282	78707283	en	0.158523	5.91e-07	0.301	0.000247	0	4:77130707-4:79093979
ENSG00000196735	NA	HLA-DQA1	Brain_Anterior_cingulate_cortex_BA241	gtex	protein_coding	chr6	32605513	32605514	en	0.160923	4.77e-07	-0.943	0.000246	0	6:31571337-6:32682664
ENSG00000174939	NA	ASPHD1	Brain_Anterior_cingulate_cortex_BA241	gtex	protein_coding	chr16	29947673	29947674	en	0.0823729	0.000424259	0.00921	0.000244	0	16:29036613-16:31382470
ENSG00000223534	NA	HLA-DQB1-AS1	Brain_Anterior_cingulate_cortex_BA241	gtex	lncRNA	chr6	32602417	32602418	en	0.333303	1.94e-14	-0.917	0.000243	0	6:31571337-6:32682664
ENSG00000136448	NA	NMT1	Brain_Anterior_cingulate_cortex_BA241	gtex	protein_coding	chr17	43148411	43148412	en	0.17409	1.46e-07	2.11	0.000239	0	17:43056905-17:45876022
ENSG00000069275	NA	NUCKS1	Brain_Anterior_cingulate_cortex_BA241	gtex	protein_coding	chr1	205709392	205709393	en	0.095335	0.000141803	-3.68	0.000239	0	1:204681068-1:205922403
ENSG00000170619	NA	COMMD5	Brain_Anterior_cingulate_cortex_BA241	gtex	protein_coding	chr8	146072653	146072654	en	0.0519871	0.00547756	-0.913	0.000237	0	8:144236881-8:146303788
ENSG00000243649	NA	CFB	Brain_Anterior_cingulate_cortex_BA241	gtex	protein_coding	chr6	31867490	31867491	en	0.0756093	0.000750029	0.832	0.000235	0	6:31571337-6:32682664
ENSG00000214946	NA	TBC1D26	Brain_Anterior_cingulate_cortex_BA241	gtex	protein_coding	chr17	15639798	15639799	en	0.408259	3.09e-18	-0.185	0.000235	0	17:15020965-17:16411522
ENSG00000265519	NA	AC015922.2	Brain_Anterior_cingulate_cortex_BA241	gtex	lncRNA	chr17	15692041	15692042	en	0.168235	2.48e-07	0.118	0.000234	0	17:15020965-17:16411522
ENSG00000257718	NA	CPNE8-AS1	Brain_Anterior_cingulate_cortex_BA241	gtex	lncRNA	chr12	39295300	39295301	en	0.0361179	0.021134	-0.908	0.000234	0	12:39227446-12:40816185
ENSG00000136068	NA	FLNB	Brain_Anterior_cingulate_cortex_BA241	gtex	protein_coding	chr3	58088790	58088791	en	0.0891228	0.000239951	-0.9	0.000233	0	3:58157850-3:60272829
ENSG00000169592	NA	INO80E	Brain_Anterior_cingulate_cortex_BA241	gtex	protein_coding	chr16	30014378	30014379	en	0.135027	4.69e-06	0.89	0.000233	0	16:29036613-16:31382470
ENSG00000176723	NA	ZNF843	Brain_Anterior_cingulate_cortex_BA241	gtex	protein_coding	chr16	31426763	31426764	en	0.0778603	0.000620547	-0.427	0.000233	0	16:29036613-16:31382470
ENSG00000103485	NA	QPRT	Brain_Anterior_cingulate_cortex_BA241	gtex	protein_coding	chr16	29676615	29676616	en	0.33247	2.13e-14	0.106	0.000232	0	16:29036613-16:31382470
ENSG00000276855	NA	AC015922.3	Brain_Anterior_cingulate_cortex_BA241	gtex	lncRNA	chr17	15716307	15716308	en	0.219776	2.12e-09	0.27	0.000231	0	17:15020965-17:16411522
ENSG00000179918	NA	SEPHS2	Brain_Anterior_cingulate_cortex_BA241	gtex	protein_coding	chr16	30481711	30481712	en	0.0311212	0.0325643	-0.566	0.000231	0	16:29036613-16:31382470
ENSG00000213658	NA	LAT	Brain_Anterior_cingulate_cortex_BA241	gtex	protein_coding	chr16	28968918	28968919	en	0.0967349	0.000125924	-0.129	0.00023	0	16:29036613-16:31382470
ENSG00000164649	NA	CDCA7L	Brain_Anterior_cingulate_cortex_BA241	gtex	protein_coding	chr7	22281571	22281572	en	0.0433124	0.0114227	0.04	0.000229	0	7:22508611-7:23469560
ENSG00000204428	NA	LY6G5C	Brain_Anterior_cingulate_cortex_BA241	gtex	protein_coding	chr6	31616204	31616205	en	0.339058	1.03e-14	0.823	0.000229	0	6:31571337-6:32682664
ENSG00000149929	NA	HIRIP3	Brain_Anterior_cingulate_cortex_BA241	gtex	protein_coding	chr16	30010694	30010695	en	0.0510674	0.00592004	-0.107	0.000227	0	16:29036613-16:31382470
ENSG00000117222	NA	RBBP5	Brain_Anterior_cingulate_cortex_BA241	gtex	protein_coding	chr1	205054649	205054650	en	0.0921392	0.000185904	0.762	0.000219	0	1:204681068-1:205922403
ENSG00000168778	NA	TCTN2	Brain_Anterior_cingulate_cortex_BA241	gtex	protein_coding	chr12	124188018	124188019	en	0.191936	2.86e-08	0.697	0.000219	0	12:122009763-12:124976982
ENSG00000179886	NA	TIGD5	Brain_Anterior_cingulate_cortex_BA241	gtex	protein_coding	chr8	144710957	144710958	en	0.052207	0.0053768	-0.819	0.000219	0	8:144236881-8:146303788
ENSG00000198169	NA	ZNF251	Brain_Anterior_cingulate_cortex_BA241	gtex	protein_coding	chr8	145977739	145977740	en	0.05776	0.0033667	0.811	0.000218	0	8:144236881-8:146303788
ENSG00000196378	NA	ZNF34	Brain_Anterior_cingulate_cortex_BA241	gtex	protein_coding	chr8	146007452	146007453	en	0.162223	4.25e-07	0.811	0.000217	0	8:144236881-8:146303788
ENSG00000163945	NA	UVSSA	Brain_Anterior_cingulate_cortex_BA241	gtex	protein_coding	chr4	1332412	1332413	en	0.310347	2.34e-13	-0.345	0.000216	0	4:695146-4:1478711
ENSG00000256092	NA	SBNO1-AS1	Brain_Anterior_cingulate_cortex_BA241	gtex	lncRNA	chr12	123847681	123847682	en	0.0981547	0.000111624	0.622	0.000214	0	12:122009763-12:124976982
ENSG00000139714	NA	MORN3	Brain_Anterior_cingulate_cortex_BA241	gtex	protein_coding	chr12	122100865	122100866	en	0.231173	7.11e-10	0.637	0.000212	0	12:122009763-12:124976982
ENSG00000139718	NA	SETD1B	Brain_Anterior_cingulate_cortex_BA241	gtex	protein_coding	chr12	122272474	122272475	en	0.0554004	0.00410712	-0.58	0.000209	0	12:122009763-12:124976982
ENSG00000162877	NA	PM20D1	Brain_Anterior_cingulate_cortex_BA241	gtex	protein_coding	chr1	205818403	205818404	en	0.221286	1.83e-09	-1.48	0.000207	0	1:204681068-1:205922403
ENSG00000237188	NA	AC242426.2	Brain_Anterior_cingulate_cortex_BA241	gtex	lncRNA	chr1	146692268	146692269	en	0.169216	2.27e-07	0.742	0.000205	0	1:144977648-1:148360712
ENSG00000188613	NA	NANOS1	Brain_Anterior_cingulate_cortex_BA241	gtex	protein_coding	chr10	120816204	120816205	en	0.0986302	0.000107206	0.626	0.000205	0	10:120591693-10:122407323
ENSG00000231852	NA	CYP21A2	Brain_Anterior_cingulate_cortex_BA241	gtex	protein_coding	chr6	32010034	32010035	en	0.168675	2.38e-07	0.696	0.000204	0	6:31571337-6:32682664
ENSG00000133059	NA	DSTYK	Brain_Anterior_cingulate_cortex_BA241	gtex	protein_coding	chr1	205143482	205143483	en	0.101278	8.56e-05	-0.612	0.000204	0	1:204681068-1:205922403
ENSG00000213563	NA	C8orf82	Brain_Anterior_cingulate_cortex_BA241	gtex	protein_coding	chr8	145745803	145745804	en	0.0486519	0.0072615	0.704	0.000201	0	8:144236881-8:146303788
ENSG00000145214	NA	DGKQ	Brain_Anterior_cingulate_cortex_BA241	gtex	protein_coding	chr4	935547	935548	en	0.160538	4.94e-07	2.94	0.000199	0	4:695146-4:1478711
ENSG00000198715	NA	GLMP	Brain_Anterior_cingulate_cortex_BA241	gtex	protein_coding	chr1	156567456	156567457	en	0.0439385	0.0108303	-0.0518	0.000199	0	1:154770403-1:156336133
ENSG00000255050	NA	AC067930.4	Brain_Anterior_cingulate_cortex_BA241	gtex	lncRNA	chr8	144670101	144670102	en	0.246762	1.56e-10	0.676	0.000197	0	8:144236881-8:146303788
ENSG00000111358	NA	GTF2H3	Brain_Anterior_cingulate_cortex_BA241	gtex	protein_coding	chr12	123911800	123911801	en	0.0409126	0.0140144	0.499	0.000196	0	12:122009763-12:124976982
ENSG00000178882	NA	RFLNA	Brain_Anterior_cingulate_cortex_BA241	gtex	protein_coding	chr12	124611353	124611354	en	0.0428898	0.011841	0.521	0.000196	0	12:122009763-12:124976982
ENSG00000204344	NA	STK19	Brain_Anterior_cingulate_cortex_BA241	gtex	protein_coding	chr6	31941828	31941829	en	0.0605125	0.00267039	-0.629	0.000196	0	6:31571337-6:32682664
ENSG00000197363	NA	ZNF517	Brain_Anterior_cingulate_cortex_BA241	gtex	protein_coding	chr8	146065893	146065894	en	0.125068	1.11e-05	-0.667	0.000196	0	8:144236881-8:146303788
ENSG00000213676	NA	ATF6B	Brain_Anterior_cingulate_cortex_BA241	gtex	protein_coding	chr6	32077817	32077818	en	0.164375	3.5e-07	0.572	0.000195	0	6:31571337-6:32682664
ENSG00000258144	NA	LINC02406	Brain_Anterior_cingulate_cortex_BA241	gtex	lncRNA	chr12	39884594	39884595	en	0.129811	7.38e-06	0.674	0.000195	0	12:39227446-12:40816185
ENSG00000188487	NA	INSC	Brain_Anterior_cingulate_cortex_BA241	gtex	protein_coding	chr11	15384377	15384378	en	0.0693524	0.00126963	-0.662	0.000194	0	11:13373433-11:15742397
ENSG00000086598	NA	TMED2	Brain_Anterior_cingulate_cortex_BA241	gtex	protein_coding	chr12	124075145	124075146	en	0.0456782	0.00934258	-0.448	0.000194	0	12:122009763-12:124976982
ENSG00000163686	NA	ABHD6	Brain_Anterior_cingulate_cortex_BA241	gtex	protein_coding	chr3	58272095	58272096	en	0.1933	2.53e-08	-0.645	0.000193	0	3:58157850-3:60272829
ENSG00000147813	NA	NAPRT	Brain_Anterior_cingulate_cortex_BA241	gtex	protein_coding	chr8	144632780	144632781	en	0.526467	2.63e-25	0.635	0.000192	0	8:144236881-8:146303788
ENSG00000182004	NA	SNRPE	Brain_Anterior_cingulate_cortex_BA241	gtex	protein_coding	chr1	203851557	203851558	en	0.133262	5.46e-06	0.802	0.000192	0	1:204681068-1:205922403
ENSG00000204463	NA	BAG6	Brain_Anterior_cingulate_cortex_BA241	gtex	protein_coding	chr6	31635457	31635458	en	0.310676	2.26e-13	-0.556	0.00019	0	6:31571337-6:32682664
ENSG00000198535	NA	C2CD4A	Brain_Anterior_cingulate_cortex_BA241	gtex	protein_coding	chr15	62371456	62371457	en	0.0758428	0.000735434	-0.631	0.00019	0	15:61266132-15:63215222
ENSG00000251226	NA	LINC02714	Brain_Anterior_cingulate_cortex_BA241	gtex	lncRNA	chr11	134123967	134123968	en	0.11388	2.92e-05	-0.635	0.00019	0	11:133000260-11:134205993
ENSG00000150977	NA	RILPL2	Brain_Anterior_cingulate_cortex_BA241	gtex	protein_coding	chr12	123934880	123934881	en	0.0880452	0.000262834	-0.438	0.00019	0	12:122009763-12:124976982
ENSG00000170382	NA	LRRN2	Brain_Anterior_cingulate_cortex_BA241	gtex	protein_coding	chr1	204646396	204646397	en	0.0377662	0.0183437	-0.256	0.000189	0	1:204681068-1:205922403
ENSG00000104524	NA	PYCR3	Brain_Anterior_cingulate_cortex_BA241	gtex	protein_coding	chr8	144683389	144683390	en	0.216882	2.78e-09	0.605	0.000189	0	8:144236881-8:146303788
ENSG00000111364	NA	DDX55	Brain_Anterior_cingulate_cortex_BA241	gtex	protein_coding	chr12	124096620	124096621	en	0.246272	1.64e-10	-0.396	0.000188	0	12:122009763-12:124976982
ENSG00000180900	NA	SCRIB	Brain_Anterior_cingulate_cortex_BA241	gtex	protein_coding	chr8	144868689	144868690	en	0.0406823	0.0142928	0.591	0.000187	0	8:144236881-8:146303788
ENSG00000204241	NA	LINC02731	Brain_Anterior_cingulate_cortex_BA241	gtex	lncRNA	chr11	133909537	133909538	en	0.263174	3.07e-11	0.578	0.000184	0	11:133000260-11:134205993
ENSG00000090316	NA	MAEA	Brain_Anterior_cingulate_cortex_BA241	gtex	protein_coding	chr4	1300566	1300567	en	0.113306	3.06e-05	0.392	0.000183	0	4:695146-4:1478711
ENSG00000110987	NA	BCL7A	Brain_Anterior_cingulate_cortex_BA241	gtex	protein_coding	chr12	122454513	122454514	en	0.0440317	0.0107449	-0.217	0.000181	0	12:122009763-12:124976982
ENSG00000234616	NA	JRK	Brain_Anterior_cingulate_cortex_BA241	gtex	protein_coding	chr8	143712586	143712587	en	0.097864	0.000114414	-0.531	0.000181	0	8:144236881-8:146303788
ENSG00000049167	NA	ERCC8	Brain_Anterior_cingulate_cortex_BA241	gtex	protein_coding	chr5	60196844	60196845	en	0.0410558	0.0138443	0.524	0.000179	0	5:58524622-5:60935451
ENSG00000204356	NA	NELFE	Brain_Anterior_cingulate_cortex_BA241	gtex	protein_coding	chr6	31921234	31921235	en	0.0651477	0.00180817	-0.436	0.000179	0	6:31571337-6:32682664
ENSG00000270195	NA	AC016773.1	Brain_Anterior_cingulate_cortex_BA241	gtex	lncRNA	chr4	1652605	1652606	en	0.0696885	0.00123425	1.02	0.000178	0	4:695146-4:1478711
ENSG00000158113	NA	LRRC43	Brain_Anterior_cingulate_cortex_BA241	gtex	protein_coding	chr12	122666028	122666029	en	0.0767309	0.000682456	0.177	0.000178	0	12:122009763-12:124976982
ENSG00000180834	NA	MAP6D1	Brain_Anterior_cingulate_cortex_BA241	gtex	protein_coding	chr3	183549096	183549097	en	0.0264394	0.0490989	0.509	0.000178	0	3:181511166-3:183769683
ENSG00000179698	NA	WDR97	Brain_Anterior_cingulate_cortex_BA241	gtex	protein_coding	chr8	145119471	145119472	en	0.565365	5.08e-28	0.492	0.000178	0	8:144236881-8:146303788
ENSG00000172992	NA	DCAKD	Brain_Anterior_cingulate_cortex_BA241	gtex	protein_coding	chr17	43114873	43114874	en	0.168196	2.49e-07	-1.32	0.000176	0	17:43056905-17:45876022
ENSG00000169026	NA	SLC49A3	Brain_Anterior_cingulate_cortex_BA241	gtex	protein_coding	chr4	686766	686767	en	0.218845	2.31e-09	0.236	0.000174	0	4:695146-4:1478711
ENSG00000159692	NA	CTBP1	Brain_Anterior_cingulate_cortex_BA241	gtex	protein_coding	chr4	1261298	1261299	en	0.0659509	0.00169008	0.46	0.000171	0	4:695146-4:1478711
ENSG00000104518	NA	GSDMD	Brain_Anterior_cingulate_cortex_BA241	gtex	protein_coding	chr8	144609589	144609590	en	0.247128	1.51e-10	0.406	0.000171	0	8:144236881-8:146303788
ENSG00000147804	NA	SLC39A4	Brain_Anterior_cingulate_cortex_BA241	gtex	protein_coding	chr8	145653433	145653434	en	0.13407	5.09e-06	0.409	0.000171	0	8:144236881-8:146303788
ENSG00000178852	NA	EFCAB13	Brain_Anterior_cingulate_cortex_BA241	gtex	protein_coding	chr17	45485692	45485693	en	0.306163	3.65e-13	-0.438	0.00017	0	17:43056905-17:45876022
ENSG00000196126	NA	HLA-DRB1	Brain_Anterior_cingulate_cortex_BA241	gtex	protein_coding	chr6	32516999	32517000	en	0.407666	3.33e-18	0.285	0.00017	0	6:31571337-6:32682664
ENSG00000138382	NA	METTL5	Brain_Anterior_cingulate_cortex_BA241	gtex	protein_coding	chr2	170727242	170727243	en	0.0652906	0.00178657	-0.415	0.00017	0	2:167356254-2:169968112
ENSG00000181097	NA	AC105219.1	Brain_Anterior_cingulate_cortex_BA241	gtex	lncRNA	chr8	144769831	144769832	en	0.0940111	0.000158646	0.371	0.000169	0	8:144236881-8:146303788
ENSG00000272172	NA	AC138696.2	Brain_Anterior_cingulate_cortex_BA241	gtex	lncRNA	chr8	144384973	144384974	en	0.0849728	0.000340702	-0.38	0.000169	0	8:144236881-8:146303788
ENSG00000179344	NA	HLA-DQB1	Brain_Anterior_cingulate_cortex_BA241	gtex	protein_coding	chr6	32636559	32636560	en	0.466904	1.5e-21	-0.202	0.000169	0	6:31571337-6:32682664
ENSG00000185730	NA	ZNF696	Brain_Anterior_cingulate_cortex_BA241	gtex	protein_coding	chr8	144379820	144379821	en	0.1758	1.25e-07	0.356	0.000168	0	8:144236881-8:146303788
ENSG00000131781	NA	FMO5	Brain_Anterior_cingulate_cortex_BA241	gtex	protein_coding	chr1	146725641	146725642	en	0.0444555	0.0103647	0.357	0.000167	0	1:144977648-1:148360712
ENSG00000188092	NA	GPR89B	Brain_Anterior_cingulate_cortex_BA241	gtex	protein_coding	chr1	147368877	147368878	en	0.115779	2.48e-05	0.352	0.000166	0	1:144977648-1:148360712
ENSG00000176956	NA	LY6H	Brain_Anterior_cingulate_cortex_BA241	gtex	protein_coding	chr8	144265240	144265241	en	0.0826005	0.000416192	-0.328	0.000166	0	8:144236881-8:146303788
ENSG00000204366	NA	ZBTB12	Brain_Anterior_cingulate_cortex_BA241	gtex	protein_coding	chr6	31874850	31874851	en	0.0814191	0.000459784	-0.14	0.000166	0	6:31571337-6:32682664
ENSG00000181513	NA	ACBD4	Brain_Anterior_cingulate_cortex_BA241	gtex	protein_coding	chr17	43169417	43169418	en	0.031214	0.0323022	-0.14	0.000165	0	17:43056905-17:45876022
ENSG00000163684	NA	RPP14	Brain_Anterior_cingulate_cortex_BA241	gtex	protein_coding	chr3	58261556	58261557	en	0.0362146	0.020959	-0.263	0.000165	0	3:58157850-3:60272829
ENSG00000152931	NA	PART1	Brain_Anterior_cingulate_cortex_BA241	gtex	lncRNA	chr5	60128412	60128413	en	0.043764	0.0109923	-0.309	0.000164	0	5:58524622-5:60935451
ENSG00000259251	NA	AC104590.1	Brain_Anterior_cingulate_cortex_BA241	gtex	lncRNA	chr15	62356589	62356590	en	0.181994	7.13e-08	0.298	0.000163	0	15:61266132-15:63215222
ENSG00000255545	NA	AP004608.1	Brain_Anterior_cingulate_cortex_BA241	gtex	lncRNA	chr11	134057116	134057117	en	0.459932	3.88e-21	-0.284	0.000163	0	11:133000260-11:134205993
ENSG00000166105	NA	GLB1L3	Brain_Anterior_cingulate_cortex_BA241	gtex	protein_coding	chr11	134145448	134145449	en	0.134292	5e-06	0.289	0.000163	0	11:133000260-11:134205993
ENSG00000160948	NA	VPS28	Brain_Anterior_cingulate_cortex_BA241	gtex	protein_coding	chr8	145613178	145613179	en	0.325108	4.77e-14	-0.255	0.000163	0	8:144236881-8:146303788
ENSG00000272115	NA	AC233992.3	Brain_Anterior_cingulate_cortex_BA241	gtex	lncRNA	chr8	145618087	145618088	en	0.0392031	0.0162189	-0.238	0.000162	0	8:144236881-8:146303788
ENSG00000152253	NA	SPC25	Brain_Anterior_cingulate_cortex_BA241	gtex	protein_coding	chr2	169740644	169740645	en	0.0292548	0.0383269	0.263	0.000162	0	2:167356254-2:169968112
ENSG00000274372	NA	LINC02804	Brain_Anterior_cingulate_cortex_BA241	gtex	lncRNA	chr1	147490588	147490589	en	0.160122	5.12e-07	0.215	0.00016	0	1:144977648-1:148360712
ENSG00000129422	NA	MTUS1	Brain_Anterior_cingulate_cortex_BA241	gtex	protein_coding	chr8	17509946	17509947	en	0.235369	4.74e-10	0.216	0.00016	0	8:15991660-8:17387624
ENSG00000181638	NA	ZFP41	Brain_Anterior_cingulate_cortex_BA241	gtex	protein_coding	chr8	144362866	144362867	en	0.0694792	0.00125617	-0.17	0.00016	0	8:144236881-8:146303788
ENSG00000204839	NA	MROH6	Brain_Anterior_cingulate_cortex_BA241	gtex	protein_coding	chr8	144650108	144650109	en	0.148392	1.45e-06	-0.0959	0.000159	0	8:144236881-8:146303788
ENSG00000003989	NA	SLC7A2	Brain_Anterior_cingulate_cortex_BA241	gtex	protein_coding	chr8	17384884	17384885	en	0.0559717	0.00391405	-0.177	0.000159	0	8:15991660-8:17387624
ENSG00000254812	NA	AC067930.2	Brain_Anterior_cingulate_cortex_BA241	gtex	lncRNA	chr8	144701230	144701231	en	0.175941	1.24e-07	0.0487	0.000158	0	8:144236881-8:146303788
ENSG00000071894	NA	CPSF1	Brain_Anterior_cingulate_cortex_BA241	gtex	protein_coding	chr8	145600385	145600386	en	0.585584	1.58e-29	-0.0496	0.000158	0	8:144236881-8:146303788
ENSG00000253716	NA	MINCR	Brain_Anterior_cingulate_cortex_BA241	gtex	lncRNA	chr8	144369416	144369417	en	0.393701	1.83e-17	0.0576	0.000158	0	8:144236881-8:146303788
ENSG00000179526	NA	SHARPIN	Brain_Anterior_cingulate_cortex_BA241	gtex	protein_coding	chr8	145162755	145162756	en	0.0468377	0.00846754	-0.0433	0.000158	0	8:144236881-8:146303788
ENSG00000183309	NA	ZNF623	Brain_Anterior_cingulate_cortex_BA241	gtex	protein_coding	chr8	144699928	144699929	en	0.104537	6.48e-05	0.0165	0.000158	0	8:144236881-8:146303788
ENSG00000224481	NA	AC245100.1	Brain_Anterior_cingulate_cortex_BA241	gtex	lncRNA	chr1	147778672	147778673	en	0.0483214	0.00746748	0.0165	0.000157	0	1:144977648-1:148360712
ENSG00000198791	NA	CNOT7	Brain_Anterior_cingulate_cortex_BA241	gtex	protein_coding	chr8	17119971	17119972	en	0.241802	2.54e-10	-0.0916	0.000157	0	8:15991660-8:17387624
ENSG00000139117	NA	CPNE8	Brain_Anterior_cingulate_cortex_BA241	gtex	protein_coding	chr12	39159360	39159361	en	0.0637253	0.00203794	0.0289	0.000157	0	12:39227446-12:40816185
ENSG00000155970	NA	MICU3	Brain_Anterior_cingulate_cortex_BA241	gtex	protein_coding	chr8	16959716	16959717	en	0.0664238	0.00162419	0.053	0.000157	0	8:15991660-8:17387624
ENSG00000151503	NA	NCAPD3	Brain_Anterior_cingulate_cortex_BA241	gtex	protein_coding	chr11	134044865	134044866	en	0.0262849	0.0497749	0.0341	0.000157	0	11:133000260-11:134205993
ENSG00000104213	NA	PDGFRL	Brain_Anterior_cingulate_cortex_BA241	gtex	protein_coding	chr8	17461557	17461558	en	0.063743	0.00203491	-0.105	0.000157	0	8:15991660-8:17387624
ENSG00000120071	NA	KANSL1	Brain_Anterior_cingulate_cortex_BA241	gtex	protein_coding	chr17	44192868	44192869	en	0.287177	2.66e-12	-1.31	0.000149	0	17:43056905-17:45876022
ENSG00000233175	NA	AC008105.1	Brain_Anterior_cingulate_cortex_BA241	gtex	lncRNA	chr17	43311649	43311650	en	0.416665	1.09e-18	1.62	0.000148	0	17:43056905-17:45876022
ENSG00000108379	NA	WNT3	Brain_Anterior_cingulate_cortex_BA241	gtex	protein_coding	chr17	44889486	44889487	en	0.656807	1.72e-35	-2.78	0.000143	0	17:43056905-17:45876022
ENSG00000263293	NA	AC068234.2	Brain_Anterior_cingulate_cortex_BA241	gtex	lncRNA	chr17	45389939	45389940	en	0.0293829	0.0378997	0.287	0.000131	0	17:43056905-17:45876022
ENSG00000262879	NA	AC005670.3	Brain_Anterior_cingulate_cortex_BA241	gtex	lncRNA	chr17	45119664	45119665	en	0.432027	1.54e-19	-0.687	0.00013	0	17:43056905-17:45876022
ENSG00000259207	NA	ITGB3	Brain_Anterior_cingulate_cortex_BA241	gtex	protein_coding	chr17	45403040	45403041	en	0.162556	4.12e-07	-0.343	0.000127	0	17:43056905-17:45876022
ENSG00000264920	NA	AC018521.5	Brain_Anterior_cingulate_cortex_BA241	gtex	lncRNA	chr17	45970989	45970990	en	0.260788	3.89e-11	0.188	0.000125	0	17:43056905-17:45876022
ENSG00000141294	NA	LRRC46	Brain_Anterior_cingulate_cortex_BA241	gtex	protein_coding	chr17	45885177	45885178	en	0.153513	9.22e-07	0.099	0.000125	0	17:43056905-17:45876022
ENSG00000159111	NA	MRPL10	Brain_Anterior_cingulate_cortex_BA241	gtex	protein_coding	chr17	45896511	45896512	en	0.0902045	0.000218976	0.154	0.000125	0	17:43056905-17:45876022
ENSG00000141295	NA	SCRN2	Brain_Anterior_cingulate_cortex_BA241	gtex	protein_coding	chr17	45912921	45912922	en	0.155654	7.63e-07	-0.116	0.000124	0	17:43056905-17:45876022
ENSG00000159314	NA	ARHGAP27	Brain_Caudate_basal_ganglia1	gtex	protein_coding	chr17	43522653	43522654	en	0.122012	5.98e-07	-9.26	1	0	17:43056905-17:45876022
ENSG00000004468	NA	CD38	Brain_Caudate_basal_ganglia1	gtex	protein_coding	chr4	15831392	15831393	en	0.204845	3.46e-11	-7.55	1	0	4:15147446-4:15926136
ENSG00000117280	NA	RAB29	Brain_Caudate_basal_ganglia1	gtex	protein_coding	chr1	205745384	205745385	en	0.198474	7.56e-11	5.97	1	0	1:204681068-1:205922403
ENSG00000198648	NA	STK39	Brain_Caudate_basal_ganglia1	gtex	protein_coding	chr2	169071313	169071314	en	0.0656685	0.000310217	-5.09	0.98	0	2:167356254-2:169968112
ENSG00000145335	NA	SNCA	Brain_Caudate_basal_ganglia1	gtex	protein_coding	chr4	90511096	90511097	en	0.0385143	0.00609712	-7.03	0.976	0	4:90231746-4:91560677
ENSG00000136243	NA	NUPL2	Brain_Caudate_basal_ganglia1	gtex	protein_coding	chr7	23234140	23234141	en	0.295426	2.63e-16	4.86	0.804	1	7:22508611-7:23469560
ENSG00000145214	NA	DGKQ	Brain_Caudate_basal_ganglia1	gtex	protein_coding	chr4	863051	863052	en	0.0803109	6.23e-05	-2.22	0.76	1	4:695146-4:1478711
ENSG00000127419	NA	TMEM175	Brain_Caudate_basal_ganglia1	gtex	protein_coding	chr4	928469	928470	en	0.0795598	6.76e-05	-4.35	0.725	1	4:695146-4:1478711
ENSG00000103510	NA	KAT8	Brain_Caudate_basal_ganglia1	gtex	protein_coding	chr16	31135142	31135143	en	0.204582	3.57e-11	-5.46	0.557	1	16:29036613-16:31382470
ENSG00000145217	NA	SLC26A1	Brain_Caudate_basal_ganglia1	gtex	protein_coding	chr4	948223	948224	en	0.249352	1.25e-13	4.1	0.422	0	4:695146-4:1478711
ENSG00000141027	NA	NCOR1	Brain_Caudate_basal_ganglia1	gtex	protein_coding	chr17	16010797	16010798	en	0.0322784	0.0121878	4.78	0.303	1	17:15020965-17:16411522
ENSG00000214941	NA	ZSWIM7	Brain_Caudate_basal_ganglia1	gtex	protein_coding	chr17	15888977	15888978	en	0.34516	2.17e-19	4.77	0.29	1	17:15020965-17:16411522
ENSG00000169242	NA	EFNA1	Brain_Caudate_basal_ganglia1	gtex	protein_coding	chr1	155095158	155095159	en	0.143826	4.95e-08	4	0.28	0	1:154770403-1:156336133
ENSG00000275413	NA	AC002553.2	Brain_Caudate_basal_ganglia1	gtex	lncRNA	chr17	15913120	15913121	en	0.0224041	0.037244	-4.76	0.275	1	17:15020965-17:16411522
ENSG00000196118	NA	CCDC189	Brain_Caudate_basal_ganglia1	gtex	protein_coding	chr16	30793318	30793319	en	0.182368	5.31e-10	5.28	0.23	1	16:29036613-16:31382470
ENSG00000164182	NA	NDUFAF2	Brain_Caudate_basal_ganglia1	gtex	protein_coding	chr5	60435161	60435162	en	0.0915523	1.8e-05	3.91	0.216	0	5:58524622-5:60935451
ENSG00000230658	NA	KLHL7-DT	Brain_Caudate_basal_ganglia1	gtex	lncRNA	chr7	23141511	23141512	en	0.583132	2.48e-38	-4.46	0.129	0	7:22508611-7:23469560
ENSG00000167395	NA	ZNF646	Brain_Caudate_basal_ganglia1	gtex	protein_coding	chr16	31061262	31061263	en	0.0608109	0.000527852	-5.14	0.112	1	16:29036613-16:31382470
ENSG00000170425	NA	ADORA2B	Brain_Caudate_basal_ganglia1	gtex	protein_coding	chr17	15815923	15815924	en	0.086332	3.21e-05	4.55	0.106	0	17:15020965-17:16411522
ENSG00000103496	NA	STX4	Brain_Caudate_basal_ganglia1	gtex	protein_coding	chr16	31041074	31041075	en	0.0420942	0.00410737	5.13	0.103	0	16:29036613-16:31382470
ENSG00000189157	NA	FAM47E	Brain_Caudate_basal_ganglia1	gtex	protein_coding	chr4	77145751	77145752	en	0.443299	3.26e-26	-3.6	0.0819	0	4:77130707-4:79093979
ENSG00000107651	NA	SEC23IP	Brain_Caudate_basal_ganglia1	gtex	protein_coding	chr10	121667020	121667021	en	0.0943176	1.33e-05	3.51	0.0611	0	10:120591693-10:122407323
ENSG00000204267	NA	TAP2	Brain_Caudate_basal_ganglia1	gtex	protein_coding	chr6	32962257	32962258	en	0.33584	8.52e-19	3.46	0.0506	0	6:31571337-6:32682664
ENSG00000184445	NA	KNTC1	Brain_Caudate_basal_ganglia1	gtex	protein_coding	chr12	123101708	123101709	en	0.056444	0.000851149	-3.42	0.0467	1	12:122009763-12:124976982
ENSG00000225342	NA	AC079630.1	Brain_Caudate_basal_ganglia1	gtex	lncRNA	chr12	40568891	40568892	en	0.162819	5.42e-09	-3.23	0.035	0	12:39227446-12:40816185
ENSG00000138722	NA	MMRN1	Brain_Caudate_basal_ganglia1	gtex	protein_coding	chr4	90859255	90859256	en	0.198752	7.3e-11	6.47	0.0321	0	4:90231746-4:91560677
ENSG00000197653	NA	DNAH10	Brain_Caudate_basal_ganglia1	gtex	protein_coding	chr12	124309109	124309110	en	0.0693535	0.000207219	3.31	0.0318	0	12:122009763-12:124976982
ENSG00000130787	NA	HIP1R	Brain_Caudate_basal_ganglia1	gtex	protein_coding	chr12	123339477	123339478	en	0.0272672	0.0213961	3.21	0.0246	0	12:122009763-12:124976982
ENSG00000122550	NA	KLHL7	Brain_Caudate_basal_ganglia1	gtex	protein_coding	chr7	23165744	23165745	en	0.0989166	7.96e-06	-3.97	0.023	0	7:22508611-7:23469560
ENSG00000163749	NA	CCDC158	Brain_Caudate_basal_ganglia1	gtex	protein_coding	chr4	77307462	77307463	en	0.0571922	0.000784239	-3.11	0.0174	0	4:77130707-4:79093979
ENSG00000179195	NA	ZNF664	Brain_Caudate_basal_ganglia1	gtex	protein_coding	chr12	124481936	124481937	en	0.0304138	0.0150149	-3.07	0.0154	0	12:122009763-12:124976982
ENSG00000138760	NA	SCARB2	Brain_Caudate_basal_ganglia1	gtex	protein_coding	chr4	77124090	77124091	en	0.110318	2.23e-06	3	0.0151	0	4:77130707-4:79093979
ENSG00000188906	NA	LRRK2	Brain_Caudate_basal_ganglia1	gtex	protein_coding	chr12	40562234	40562235	en	0.128418	2.89e-07	2.37	0.013	0	12:39227446-12:40816185
ENSG00000119242	NA	CCDC92	Brain_Caudate_basal_ganglia1	gtex	protein_coding	chr12	124402970	124402971	en	0.0552648	0.00096838	2.91	0.00961	0	12:122009763-12:124976982
ENSG00000152128	NA	TMEM163	Brain_Caudate_basal_ganglia1	gtex	protein_coding	chr2	135550249	135550250	en	0.0528488	0.00126156	2.89	0.00913	0	2:135159453-2:137042794
ENSG00000273493	NA	AC098479.1	Brain_Caudate_basal_ganglia1	gtex	lncRNA	chr3	58307876	58307877	en	0.0376421	0.0067148	2.84	0.00799	0	3:58157850-3:60272829
ENSG00000204290	NA	BTNL2	Brain_Caudate_basal_ganglia1	gtex	protein_coding	chr6	32352324	32352325	en	0.133642	1.59e-07	2.84	0.00753	0	6:31571337-6:32682664
ENSG00000150967	NA	ABCB9	Brain_Caudate_basal_ganglia1	gtex	protein_coding	chr12	123480105	123480106	en	0.0416477	0.00431451	-2.82	0.0073	0	12:122009763-12:124976982
ENSG00000250091	NA	DNAH10OS	Brain_Caudate_basal_ganglia1	gtex	lncRNA	chr12	124437213	124437214	en	0.147075	3.4e-08	2.76	0.00628	0	12:122009763-12:124976982
ENSG00000167397	NA	VKORC1	Brain_Caudate_basal_ganglia1	gtex	protein_coding	chr16	31105554	31105555	en	0.0785451	7.56e-05	4.33	0.00606	0	16:29036613-16:31382470
ENSG00000204371	NA	EHMT2	Brain_Caudate_basal_ganglia1	gtex	protein_coding	chr6	31859351	31859352	en	0.13497	1.37e-07	2.67	0.00489	0	6:31571337-6:32682664
ENSG00000163357	NA	DCST1	Brain_Caudate_basal_ganglia1	gtex	protein_coding	chr1	155014426	155014427	en	0.022747	0.0358045	-2.52	0.00434	0	1:154770403-1:156336133
ENSG00000224043	NA	CCNT2-AS1	Brain_Caudate_basal_ganglia1	gtex	lncRNA	chr2	135678570	135678571	en	0.021877	0.0395755	2.6	0.0042	0	2:135159453-2:137042794
ENSG00000162877	NA	PM20D1	Brain_Caudate_basal_ganglia1	gtex	protein_coding	chr1	205818403	205818404	en	0.183811	4.47e-10	-1.38	0.00397	0	1:204681068-1:205922403
ENSG00000082258	NA	CCNT2	Brain_Caudate_basal_ganglia1	gtex	protein_coding	chr2	135701353	135701354	en	0.143896	4.91e-08	-2.55	0.00365	0	2:135159453-2:137042794
ENSG00000235560	NA	AC002310.1	Brain_Caudate_basal_ganglia1	gtex	lncRNA	chr16	30538059	30538060	en	0.0590706	0.000638554	-2.6	0.00362	0	16:29036613-16:31382470
ENSG00000133065	NA	SLC41A1	Brain_Caudate_basal_ganglia1	gtex	protein_coding	chr1	205764483	205764484	en	0.0421073	0.00410145	1.89	0.00361	0	1:204681068-1:205922403
ENSG00000169241	NA	SLC50A1	Brain_Caudate_basal_ganglia1	gtex	protein_coding	chr1	155116924	155116925	en	0.0435408	0.00350271	-2.63	0.0034	0	1:154770403-1:156336133
ENSG00000185619	NA	PCGF3	Brain_Caudate_basal_ganglia1	gtex	protein_coding	chr4	769089	769090	en	0.123014	5.34e-07	-2.31	0.00316	0	4:695146-4:1478711
ENSG00000275263	NA	AC135048.3	Brain_Caudate_basal_ganglia1	gtex	lncRNA	chr16	30939821	30939822	en	0.0445218	0.00314452	4.12	0.00275	0	16:29036613-16:31382470
ENSG00000049167	NA	ERCC8	Brain_Caudate_basal_ganglia1	gtex	protein_coding	chr5	60196844	60196845	en	0.0596168	0.000601517	-2.46	0.00275	0	5:58524622-5:60935451
ENSG00000181350	NA	LRRC75A	Brain_Caudate_basal_ganglia1	gtex	protein_coding	chr17	16392342	16392343	en	0.050886	0.00156413	3.01	0.00268	0	17:15020965-17:16411522
ENSG00000160685	NA	ZBTB7B	Brain_Caudate_basal_ganglia1	gtex	protein_coding	chr1	154983899	154983900	en	0.0429649	0.00373189	2.39	0.00259	0	1:154770403-1:156336133
ENSG00000234745	NA	HLA-B	Brain_Caudate_basal_ganglia1	gtex	protein_coding	chr6	31505389	31505390	en	0.190425	2.01e-10	2.41	0.00255	0	6:31571337-6:32682664
ENSG00000178222	NA	RNF212	Brain_Caudate_basal_ganglia1	gtex	protein_coding	chr4	1095180	1095181	en	0.0974471	9.38e-06	2.44	0.00218	0	4:695146-4:1478711
ENSG00000103502	NA	CDIPT	Brain_Caudate_basal_ganglia1	gtex	protein_coding	chr16	29858631	29858632	en	0.0377102	0.00666435	2.14	0.00209	0	16:29036613-16:31382470
ENSG00000280789	NA	PAGR1	Brain_Caudate_basal_ganglia1	gtex	protein_coding	chr16	29625474	29625475	en	0.0443364	0.00320926	-1.96	0.00208	0	16:29036613-16:31382470
ENSG00000183605	NA	SFXN4	Brain_Caudate_basal_ganglia1	gtex	protein_coding	chr10	120915961	120915962	en	0.550957	3.21e-35	2.25	0.00201	0	10:120591693-10:122407323
ENSG00000103472	NA	RRN3P2	Brain_Caudate_basal_ganglia1	gtex	lncRNA	chr16	29122394	29122395	en	0.0918264	1.75e-05	1.93	0.00178	0	16:29036613-16:31382470
ENSG00000204287	NA	HLA-DRA	Brain_Caudate_basal_ganglia1	gtex	protein_coding	chr6	32497681	32497682	en	0.0885077	2.52e-05	2.22	0.00166	0	6:31571337-6:32682664
ENSG00000178950	NA	GAK	Brain_Caudate_basal_ganglia1	gtex	protein_coding	chr4	860619	860620	en	0.0499916	0.00172521	1.71	0.00164	0	4:695146-4:1478711
ENSG00000225914	NA	TSBP1-AS1	Brain_Caudate_basal_ganglia1	gtex	lncRNA	chr6	32289213	32289214	en	0.203893	3.89e-11	2.15	0.00147	0	6:31571337-6:32682664
ENSG00000204348	NA	DXO	Brain_Caudate_basal_ganglia1	gtex	protein_coding	chr6	31953955	31953956	en	0.110234	2.25e-06	2.11	0.00146	0	6:31571337-6:32682664
ENSG00000177234	NA	LINC01561	Brain_Caudate_basal_ganglia1	gtex	lncRNA	chr10	122361312	122361313	en	0.150249	2.35e-08	-2.11	0.00141	0	10:120591693-10:122407323
ENSG00000151923	NA	TIAL1	Brain_Caudate_basal_ganglia1	gtex	protein_coding	chr10	121315941	121315942	en	0.0378377	0.00657097	-2.04	0.00137	0	10:120591693-10:122407323
ENSG00000143537	NA	ADAM15	Brain_Caudate_basal_ganglia1	gtex	protein_coding	chr1	155056070	155056071	en	0.160798	6.87e-09	-1.98	0.00125	0	1:154770403-1:156336133
ENSG00000111328	NA	CDK2AP1	Brain_Caudate_basal_ganglia1	gtex	protein_coding	chr12	123746405	123746406	en	0.0585874	0.000673215	2.05	0.00124	0	12:122009763-12:124976982
ENSG00000163479	NA	SSR2	Brain_Caudate_basal_ganglia1	gtex	protein_coding	chr1	155773532	155773533	en	0.0672283	0.00026152	2.14	0.00123	0	1:154770403-1:156336133
ENSG00000011295	NA	TTC19	Brain_Caudate_basal_ganglia1	gtex	protein_coding	chr17	15946193	15946194	en	0.229597	1.57e-12	-3.25	0.00118	0	17:15020965-17:16411522
ENSG00000178226	NA	PRSS36	Brain_Caudate_basal_ganglia1	gtex	protein_coding	chr16	31159361	31159362	en	0.378862	1.3e-21	-4	0.00117	0	16:29036613-16:31382470
ENSG00000272360	NA	AC116036.2	Brain_Caudate_basal_ganglia1	gtex	lncRNA	chr3	58477221	58477222	en	0.0512026	0.00151081	-2.02	0.00114	0	3:58157850-3:60272829
ENSG00000204304	NA	PBX2	Brain_Caudate_basal_ganglia1	gtex	protein_coding	chr6	32161278	32161279	en	0.0568043	0.000818244	2	0.00106	0	6:31571337-6:32682664
ENSG00000136068	NA	FLNB	Brain_Caudate_basal_ganglia1	gtex	protein_coding	chr3	57808905	57808906	en	0.0818198	5.27e-05	-1.93	0.000968	0	3:58157850-3:60272829
ENSG00000278133	NA	AC135050.6	Brain_Caudate_basal_ganglia1	gtex	lncRNA	chr16	31117647	31117648	en	0.0516489	0.00143872	3.89	0.000938	0	16:29036613-16:31382470
ENSG00000185829	NA	ARL17A	Brain_Caudate_basal_ganglia1	gtex	protein_coding	chr17	44363390	44363391	en	0.379656	1.15e-21	0.605	0.000938	0	17:43056905-17:45876022
ENSG00000244731	NA	C4A	Brain_Caudate_basal_ganglia1	gtex	protein_coding	chr6	31946761	31946762	en	0.312203	2.53e-17	-1.93	0.000936	0	6:31571337-6:32682664
ENSG00000130921	NA	C12orf65	Brain_Caudate_basal_ganglia1	gtex	protein_coding	chr12	123731644	123731645	en	0.0853353	3.58e-05	1.88	0.00093	0	12:122009763-12:124976982
ENSG00000168306	NA	ACOX2	Brain_Caudate_basal_ganglia1	gtex	protein_coding	chr3	58531538	58531539	en	0.0797854	6.6e-05	-1.9	0.000909	0	3:58157850-3:60272829
ENSG00000160803	NA	UBQLN4	Brain_Caudate_basal_ganglia1	gtex	protein_coding	chr1	155825638	155825639	en	0.149756	2.49e-08	1.98	0.000899	0	1:154770403-1:156336133
ENSG00000232759	NA	AC002480.1	Brain_Caudate_basal_ganglia1	gtex	lncRNA	chr7	22601476	22601477	en	0.0378677	0.00654916	-2.02	0.00088	0	7:22508611-7:23469560
ENSG00000073969	NA	NSF	Brain_Caudate_basal_ganglia1	gtex	protein_coding	chr17	44735471	44735472	en	0.0332846	0.0108938	-4.28	0.000871	0	17:43056905-17:45876022
ENSG00000110801	NA	PSMD9	Brain_Caudate_basal_ganglia1	gtex	protein_coding	chr12	122342688	122342689	en	0.0288211	0.0179564	1.82	0.000866	0	12:122009763-12:124976982
ENSG00000163354	NA	DCST2	Brain_Caudate_basal_ganglia1	gtex	protein_coding	chr1	154968696	154968697	en	0.184797	3.97e-10	-1.81	0.000827	0	1:154770403-1:156336133
ENSG00000273133	NA	AC116651.1	Brain_Caudate_basal_ganglia1	gtex	lncRNA	chr4	15573132	15573133	en	0.158311	9.19e-09	0.935	0.000815	0	4:15147446-4:15926136
ENSG00000186868	NA	MAPT	Brain_Caudate_basal_ganglia1	gtex	protein_coding	chr17	44436162	44436163	en	0.023127	0.034276	1.51	0.00079	0	17:43056905-17:45876022
ENSG00000138750	NA	NUP54	Brain_Caudate_basal_ganglia1	gtex	protein_coding	chr4	77074567	77074568	en	0.313132	2.22e-17	-1.72	0.000782	0	4:77130707-4:79093979
ENSG00000069275	NA	NUCKS1	Brain_Caudate_basal_ganglia1	gtex	protein_coding	chr1	205680963	205680964	en	0.0682044	0.00023501	-3.55	0.000742	0	1:204681068-1:205922403
ENSG00000234283	NA	LINC01731	Brain_Caudate_basal_ganglia1	gtex	lncRNA	chr1	147371886	147371887	en	0.130073	2.39e-07	1.76	0.000708	0	1:144977648-1:148360712
ENSG00000103549	NA	RNF40	Brain_Caudate_basal_ganglia1	gtex	protein_coding	chr16	30801496	30801497	en	0.150054	2.41e-08	-3.29	0.000675	0	16:29036613-16:31382470
ENSG00000169231	NA	THBS3	Brain_Caudate_basal_ganglia1	gtex	protein_coding	chr1	155169051	155169052	en	0.0848817	3.76e-05	-1.83	0.000673	0	1:154770403-1:156336133
ENSG00000233002	NA	AC005324.1	Brain_Caudate_basal_ganglia1	gtex	lncRNA	chr17	15621553	15621554	en	0.364647	1.16e-20	-1.35	0.000666	0	17:15020965-17:16411522
ENSG00000099377	NA	HSD3B7	Brain_Caudate_basal_ganglia1	gtex	protein_coding	chr16	30967687	30967688	en	0.0576822	0.000743306	-3.14	0.000661	0	16:29036613-16:31382470
ENSG00000260911	NA	AC135050.3	Brain_Caudate_basal_ganglia1	gtex	lncRNA	chr16	31080656	31080657	en	0.22787	1.96e-12	-3	0.000657	0	16:29036613-16:31382470
ENSG00000141279	NA	NPEPPS	Brain_Caudate_basal_ganglia1	gtex	protein_coding	chr17	45655966	45655967	en	0.0782548	7.8e-05	0.319	0.000652	0	17:43056905-17:45876022
ENSG00000118564	NA	FBXL5	Brain_Caudate_basal_ganglia1	gtex	protein_coding	chr4	15661775	15661776	en	0.0252728	0.0268256	2.22	0.000642	0	4:15147446-4:15926136
ENSG00000186583	NA	SPATC1	Brain_Caudate_basal_ganglia1	gtex	protein_coding	chr8	145052137	145052138	en	0.0223324	0.0375525	-1.67	0.000618	0	8:144236881-8:146303788
ENSG00000130783	NA	CCDC62	Brain_Caudate_basal_ganglia1	gtex	protein_coding	chr12	123297728	123297729	en	0.0784222	7.66e-05	-1.62	0.000608	0	12:122009763-12:124976982
ENSG00000143622	NA	RIT1	Brain_Caudate_basal_ganglia1	gtex	protein_coding	chr1	155907702	155907703	en	0.0268258	0.0224915	1.77	0.000607	0	1:154770403-1:156336133
ENSG00000108474	NA	PIGL	Brain_Caudate_basal_ganglia1	gtex	protein_coding	chr17	16287980	16287981	en	0.0396766	0.00536232	2.96	0.000604	0	17:15020965-17:16411522
ENSG00000233885	NA	YEATS2-AS1	Brain_Caudate_basal_ganglia1	gtex	lncRNA	chr3	183528186	183528187	en	0.432295	2.16e-25	-1.63	0.000573	0	3:181511166-3:183769683
ENSG00000203499	NA	IQANK1	Brain_Caudate_basal_ganglia1	gtex	protein_coding	chr8	144847868	144847869	en	0.0689235	0.000217211	1.61	0.000558	0	8:144236881-8:146303788
ENSG00000176956	NA	LY6H	Brain_Caudate_basal_ganglia1	gtex	protein_coding	chr8	144253028	144253029	en	0.191889	1.68e-10	1.56	0.00052	0	8:144236881-8:146303788
ENSG00000185499	NA	MUC1	Brain_Caudate_basal_ganglia1	gtex	protein_coding	chr1	155165034	155165035	en	0.0633966	0.000397781	1.62	0.000499	0	1:154770403-1:156336133
ENSG00000231890	NA	DARS-AS1	Brain_Caudate_basal_ganglia1	gtex	lncRNA	chr2	136755987	136755988	en	0.126911	3.43e-07	1.54	0.000495	0	2:135159453-2:137042794
ENSG00000163344	NA	PMVK	Brain_Caudate_basal_ganglia1	gtex	protein_coding	chr1	154869965	154869966	en	0.0641168	0.000367637	1.47	0.000487	0	1:154770403-1:156336133
ENSG00000225190	NA	PLEKHM1	Brain_Caudate_basal_ganglia1	gtex	protein_coding	chr17	43504120	43504121	en	0.206555	2.8e-11	-8.09	0.000484	0	17:43056905-17:45876022
ENSG00000163346	NA	PBXIP1	Brain_Caudate_basal_ganglia1	gtex	protein_coding	chr1	154926901	154926902	en	0.0232163	0.033927	-1.46	0.000483	0	1:154770403-1:156336133
ENSG00000143603	NA	KCNN3	Brain_Caudate_basal_ganglia1	gtex	protein_coding	chr1	154778575	154778576	en	0.0728083	0.000141903	-1.43	0.000478	0	1:154770403-1:156336133
ENSG00000118804	NA	STBD1	Brain_Caudate_basal_ganglia1	gtex	protein_coding	chr4	77228604	77228605	en	0.444484	2.65e-26	1.43	0.000473	0	4:77130707-4:79093979
ENSG00000255182	NA	AC084125.2	Brain_Caudate_basal_ganglia1	gtex	lncRNA	chr8	145732895	145732896	en	0.0342298	0.00980547	-1.49	0.000467	0	8:144236881-8:146303788
ENSG00000102882	NA	MAPK3	Brain_Caudate_basal_ganglia1	gtex	protein_coding	chr16	30141762	30141763	en	0.047486	0.00227075	-0.801	0.000465	0	16:29036613-16:31382470
ENSG00000175061	NA	SNHG29	Brain_Caudate_basal_ganglia1	gtex	lncRNA	chr17	16381203	16381204	en	0.0737154	0.000128465	2.24	0.000463	0	17:15020965-17:16411522
ENSG00000114796	NA	KLHL24	Brain_Caudate_basal_ganglia1	gtex	protein_coding	chr3	183350114	183350115	en	0.216727	7.94e-12	-1.49	0.000462	0	3:181511166-3:183769683
ENSG00000251575	NA	C5orf64-AS1	Brain_Caudate_basal_ganglia1	gtex	lncRNA	chr5	61023802	61023803	en	0.151547	2.02e-08	-1.35	0.00046	0	5:58524622-5:60935451
ENSG00000212694	NA	LINC01089	Brain_Caudate_basal_ganglia1	gtex	lncRNA	chr12	122181114	122181115	en	0.169181	2.56e-09	-1.42	0.000458	0	12:122009763-12:124976982
ENSG00000264589	NA	MAPT-AS1	Brain_Caudate_basal_ganglia1	gtex	lncRNA	chr17	43922407	43922408	en	0.221916	4.15e-12	7.63	0.000452	0	17:43056905-17:45876022
ENSG00000182307	NA	C8orf33	Brain_Caudate_basal_ganglia1	gtex	protein_coding	chr8	146264840	146264841	en	0.0264301	0.0235225	1.47	0.00045	0	8:144236881-8:146303788
ENSG00000261416	NA	AC012645.3	Brain_Caudate_basal_ganglia1	gtex	lncRNA	chr16	30141765	30141766	en	0.0216036	0.0408443	-1.02	0.000446	0	16:29036613-16:31382470
ENSG00000138759	NA	FRAS1	Brain_Caudate_basal_ganglia1	gtex	protein_coding	chr4	79210176	79210177	en	0.0669244	0.000270368	1.43	0.000446	0	4:77130707-4:79093979
ENSG00000152253	NA	SPC25	Brain_Caudate_basal_ganglia1	gtex	protein_coding	chr2	169719944	169719945	en	0.0841467	4.08e-05	1.35	0.000443	0	2:167356254-2:169968112
ENSG00000178722	NA	C5orf64	Brain_Caudate_basal_ganglia1	gtex	lncRNA	chr5	60980122	60980123	en	0.303402	8.71e-17	1.4	0.000434	0	5:58524622-5:60935451
ENSG00000139725	NA	RHOF	Brain_Caudate_basal_ganglia1	gtex	protein_coding	chr12	122235499	122235500	en	0.0882035	2.61e-05	-1.38	0.000434	0	12:122009763-12:124976982
ENSG00000260517	NA	AC009093.2	Brain_Caudate_basal_ganglia1	gtex	lncRNA	chr16	29237747	29237748	en	0.020155	0.0483111	1.19	0.000431	0	16:29036613-16:31382470
ENSG00000204463	NA	BAG6	Brain_Caudate_basal_ganglia1	gtex	protein_coding	chr6	31626675	31626676	en	0.289275	6.12e-16	-1.42	0.00043	0	6:31571337-6:32682664
ENSG00000214401	NA	KANSL1-AS1	Brain_Caudate_basal_ganglia1	gtex	lncRNA	chr17	44393289	44393290	en	0.647089	2.68e-45	-3.63	0.000429	0	17:43056905-17:45876022
ENSG00000117222	NA	RBBP5	Brain_Caudate_basal_ganglia1	gtex	protein_coding	chr1	205053388	205053389	en	0.0718708	0.000157263	1.32	0.000418	0	1:204681068-1:205922403
ENSG00000139697	NA	SBNO1	Brain_Caudate_basal_ganglia1	gtex	protein_coding	chr12	124261598	124261599	en	0.0529881	0.00124246	1.41	0.000416	0	12:122009763-12:124976982
ENSG00000204310	NA	AGPAT1	Brain_Caudate_basal_ganglia1	gtex	protein_coding	chr6	32125392	32125393	en	0.0577438	0.000738313	1.35	0.000413	0	6:31571337-6:32682664
ENSG00000274292	NA	AC084018.2	Brain_Caudate_basal_ganglia1	gtex	lncRNA	chr12	122242999	122243000	en	0.129138	2.66e-07	-1.34	0.000411	0	12:122009763-12:124976982
ENSG00000181135	NA	ZNF707	Brain_Caudate_basal_ganglia1	gtex	protein_coding	chr8	144800708	144800709	en	0.0516814	0.0014336	-1.37	0.000394	0	8:144236881-8:146303788
ENSG00000275389	NA	AC068790.9	Brain_Caudate_basal_ganglia1	gtex	lncRNA	chr12	124584811	124584812	en	0.0291119	0.0173785	-1.25	0.00038	0	12:122009763-12:124976982
ENSG00000174529	NA	TMEM81	Brain_Caudate_basal_ganglia1	gtex	protein_coding	chr1	205049161	205049162	en	0.158516	8.97e-09	1.2	0.000374	0	1:204681068-1:205922403
ENSG00000169957	NA	ZNF768	Brain_Caudate_basal_ganglia1	gtex	protein_coding	chr16	30559677	30559678	en	0.0412475	0.00450904	-2.85	0.000369	0	16:29036613-16:31382470
ENSG00000127415	NA	IDUA	Brain_Caudate_basal_ganglia1	gtex	protein_coding	chr4	974997	974998	en	0.0780504	7.98e-05	-0.639	0.000367	0	4:695146-4:1478711
ENSG00000163072	NA	NOSTRIN	Brain_Caudate_basal_ganglia1	gtex	protein_coding	chr2	169675833	169675834	en	0.0653945	0.00031966	-0.698	0.000365	0	2:167356254-2:169968112
ENSG00000162873	NA	KLHDC8A	Brain_Caudate_basal_ganglia1	gtex	protein_coding	chr1	205317403	205317404	en	0.116288	1.14e-06	1.4	0.000363	0	1:204681068-1:205922403
ENSG00000204420	NA	MPIG6B	Brain_Caudate_basal_ganglia1	gtex	protein_coding	chr6	31668112	31668113	en	0.158106	9.41e-09	1.3	0.00036	0	6:31571337-6:32682664
ENSG00000149923	NA	PPP4C	Brain_Caudate_basal_ganglia1	gtex	protein_coding	chr16	30098229	30098230	en	0.0460157	0.00266848	-0.373	0.000356	0	16:29036613-16:31382470
ENSG00000204387	NA	SNHG32	Brain_Caudate_basal_ganglia1	gtex	lncRNA	chr6	31777362	31777363	en	0.0695679	0.000202407	-1.29	0.000356	0	6:31571337-6:32682664
ENSG00000226979	NA	LTA	Brain_Caudate_basal_ganglia1	gtex	protein_coding	chr6	31562421	31562422	en	0.0529358	0.0012496	-1.27	0.00035	0	6:31571337-6:32682664
ENSG00000185803	NA	SLC52A2	Brain_Caudate_basal_ganglia1	gtex	protein_coding	chr8	145594181	145594182	en	0.159287	8.2e-09	-1.27	0.000348	0	8:144236881-8:146303788
ENSG00000187607	NA	ZNF286A	Brain_Caudate_basal_ganglia1	gtex	protein_coding	chr17	15607458	15607459	en	0.0570532	0.000796263	-0.87	0.000345	0	17:15020965-17:16411522
ENSG00000166582	NA	CENPV	Brain_Caudate_basal_ganglia1	gtex	protein_coding	chr17	16254311	16254312	en	0.46878	3.53e-28	-0.00858	0.000344	0	17:15020965-17:16411522
ENSG00000162836	NA	ACP6	Brain_Caudate_basal_ganglia1	gtex	protein_coding	chr1	147138906	147138907	en	0.540719	2.82e-34	1.27	0.000342	0	1:144977648-1:148360712
ENSG00000250616	NA	AC012645.1	Brain_Caudate_basal_ganglia1	gtex	lncRNA	chr16	30038402	30038403	en	0.0451289	0.00294153	1.44	0.000338	0	16:29036613-16:31382470
ENSG00000168291	NA	PDHB	Brain_Caudate_basal_ganglia1	gtex	protein_coding	chr3	58388750	58388751	en	0.0988176	8.05e-06	-1.26	0.000338	0	3:58157850-3:60272829
ENSG00000235663	NA	SAPCD1-AS1	Brain_Caudate_basal_ganglia1	gtex	lncRNA	chr6	31743412	31743413	en	0.0304405	0.0149701	-1.04	0.000338	0	6:31571337-6:32682664
ENSG00000259807	NA	AC009093.1	Brain_Caudate_basal_ganglia1	gtex	lncRNA	chr16	29237324	29237325	en	0.0878122	2.72e-05	0.946	0.000335	0	16:29036613-16:31382470
ENSG00000277494	NA	GPIHBP1	Brain_Caudate_basal_ganglia1	gtex	protein_coding	chr8	144297344	144297345	en	0.23854	5.04e-13	1.24	0.000333	0	8:144236881-8:146303788
ENSG00000204386	NA	NEU1	Brain_Caudate_basal_ganglia1	gtex	protein_coding	chr6	31825296	31825297	en	0.0680436	0.000239187	1.19	0.000331	0	6:31571337-6:32682664
ENSG00000204435	NA	CSNK2B	Brain_Caudate_basal_ganglia1	gtex	protein_coding	chr6	31648927	31648928	en	0.0722205	0.00015135	1.2	0.000324	0	6:31571337-6:32682664
ENSG00000204351	NA	SKIV2L	Brain_Caudate_basal_ganglia1	gtex	protein_coding	chr6	31932183	31932184	en	0.428105	4.4e-25	1.02	0.000324	0	6:31571337-6:32682664
ENSG00000272849	NA	AC084018.1	Brain_Caudate_basal_ganglia1	gtex	lncRNA	chr12	122260285	122260286	en	0.131544	2.02e-07	-1.13	0.000323	0	12:122009763-12:124976982
ENSG00000278811	NA	LINC00624	Brain_Caudate_basal_ganglia1	gtex	lncRNA	chr1	146721731	146721732	en	0.108809	2.64e-06	1.22	0.000322	0	1:144977648-1:148360712
ENSG00000048342	NA	CC2D2A	Brain_Caudate_basal_ganglia1	gtex	protein_coding	chr4	15538895	15538896	en	0.107892	2.93e-06	1.08	0.000319	0	4:15147446-4:15926136
ENSG00000204301	NA	NOTCH4	Brain_Caudate_basal_ganglia1	gtex	protein_coding	chr6	32186556	32186557	en	0.192993	1.47e-10	-1.18	0.000319	0	6:31571337-6:32682664
ENSG00000180096	NA	SEPTIN1	Brain_Caudate_basal_ganglia1	gtex	protein_coding	chr16	30418980	30418981	en	0.18015	6.93e-10	-0.842	0.000319	0	16:29036613-16:31382470
ENSG00000125409	NA	TEKT3	Brain_Caudate_basal_ganglia1	gtex	protein_coding	chr17	15227731	15227732	en	0.097592	9.23e-06	0.513	0.000318	0	17:15020965-17:16411522
ENSG00000177238	NA	TRIM72	Brain_Caudate_basal_ganglia1	gtex	protein_coding	chr16	30955932	30955933	en	0.171367	1.97e-09	1.92	0.000309	0	16:29036613-16:31382470
ENSG00000237541	NA	HLA-DQA2	Brain_Caudate_basal_ganglia1	gtex	protein_coding	chr6	32638271	32638272	en	0.538211	4.77e-34	-1.16	0.000308	0	6:31571337-6:32682664
ENSG00000198169	NA	ZNF251	Brain_Caudate_basal_ganglia1	gtex	protein_coding	chr8	145977352	145977353	en	0.0755907	0.000104575	1.16	0.000305	0	8:144236881-8:146303788
ENSG00000242808	NA	SOX2-OT	Brain_Caudate_basal_ganglia1	gtex	lncRNA	chr3	181283636	181283637	en	0.0237487	0.0319201	1.16	0.000303	0	3:181511166-3:183769683
ENSG00000261587	NA	TMEM249	Brain_Caudate_basal_ganglia1	gtex	protein_coding	chr8	145592363	145592364	en	0.0716574	0.000160986	-1.16	0.000303	0	8:144236881-8:146303788
ENSG00000051825	NA	MPHOSPH9	Brain_Caudate_basal_ganglia1	gtex	protein_coding	chr12	123685192	123685193	en	0.0578024	0.000733591	-1.11	0.000302	0	12:122009763-12:124976982
ENSG00000149922	NA	TBX6	Brain_Caudate_basal_ganglia1	gtex	protein_coding	chr16	30114959	30114960	en	0.337246	6.94e-19	1.36	0.000299	0	16:29036613-16:31382470
ENSG00000099385	NA	BCL7C	Brain_Caudate_basal_ganglia1	gtex	protein_coding	chr16	30903368	30903369	en	0.0389127	0.00583447	-1.67	0.000294	0	16:29036613-16:31382470
ENSG00000196810	NA	CTBP1-DT	Brain_Caudate_basal_ganglia1	gtex	lncRNA	chr4	1280437	1280438	en	0.0727417	0.000142943	-1.27	0.000292	0	4:695146-4:1478711
ENSG00000232629	NA	HLA-DQB2	Brain_Caudate_basal_ganglia1	gtex	protein_coding	chr6	32645036	32645037	en	0.484039	2.12e-29	0.881	0.000292	0	6:31571337-6:32682664
ENSG00000260304	NA	AC009088.2	Brain_Caudate_basal_ganglia1	gtex	lncRNA	chr16	31200471	31200472	en	0.0522598	0.00134561	2.12	0.000291	0	16:29036613-16:31382470
ENSG00000204305	NA	AGER	Brain_Caudate_basal_ganglia1	gtex	protein_coding	chr6	32124859	32124860	en	0.0813159	5.57e-05	1.04	0.000286	0	6:31571337-6:32682664
ENSG00000120088	NA	CRHR1	Brain_Caudate_basal_ganglia1	gtex	protein_coding	chr17	43885203	43885204	en	0.108623	2.7e-06	7.81	0.000284	0	17:43056905-17:45876022
ENSG00000122591	NA	FAM126A	Brain_Caudate_basal_ganglia1	gtex	protein_coding	chr7	22974587	22974588	en	0.093505	1.45e-05	-0.938	0.000283	0	7:22508611-7:23469560
ENSG00000102886	NA	GDPD3	Brain_Caudate_basal_ganglia1	gtex	protein_coding	chr16	30123555	30123556	en	0.17417	1.41e-09	-0.89	0.000279	0	16:29036613-16:31382470
ENSG00000090316	NA	MAEA	Brain_Caudate_basal_ganglia1	gtex	protein_coding	chr4	1304922	1304923	en	0.125255	4.14e-07	0.499	0.000278	0	4:695146-4:1478711
ENSG00000121988	NA	ZRANB3	Brain_Caudate_basal_ganglia1	gtex	protein_coding	chr2	136209187	136209188	en	0.0205064	0.0463773	-1.08	0.000278	0	2:135159453-2:137042794
ENSG00000175106	NA	TVP23C	Brain_Caudate_basal_ganglia1	gtex	protein_coding	chr17	15407452	15407453	en	0.0521497	0.00136194	-0.779	0.000277	0	17:15020965-17:16411522
ENSG00000143630	NA	HCN3	Brain_Caudate_basal_ganglia1	gtex	protein_coding	chr1	155272274	155272275	en	0.0289364	0.0177249	1.01	0.000275	0	1:154770403-1:156336133
ENSG00000167702	NA	KIFC2	Brain_Caudate_basal_ganglia1	gtex	protein_coding	chr8	145692008	145692009	en	0.0319131	0.0126953	-1.07	0.000275	0	8:144236881-8:146303788
ENSG00000180834	NA	MAP6D1	Brain_Caudate_basal_ganglia1	gtex	protein_coding	chr3	183548661	183548662	en	0.139666	7.99e-08	1.06	0.000272	0	3:181511166-3:183769683
ENSG00000275371	NA	AC012645.4	Brain_Caudate_basal_ganglia1	gtex	lncRNA	chr16	30117774	30117775	en	0.148245	2.97e-08	-0.59	0.000269	0	16:29036613-16:31382470
ENSG00000196683	NA	TOMM7	Brain_Caudate_basal_ganglia1	gtex	protein_coding	chr7	22876448	22876449	en	0.354955	5.03e-20	-0.773	0.000268	0	7:22508611-7:23469560
ENSG00000155975	NA	VPS37A	Brain_Caudate_basal_ganglia1	gtex	protein_coding	chr8	17064853	17064854	en	0.0278444	0.0200458	-1.05	0.000268	0	8:15991660-8:17387624
ENSG00000176723	NA	ZNF843	Brain_Caudate_basal_ganglia1	gtex	protein_coding	chr16	31457422	31457423	en	0.0217416	0.0401987	-1.66	0.000266	0	16:29036613-16:31382470
ENSG00000169217	NA	CD2BP2	Brain_Caudate_basal_ganglia1	gtex	protein_coding	chr16	30395277	30395278	en	0.0607171	0.000533296	0.425	0.000265	0	16:29036613-16:31382470
ENSG00000090238	NA	YPEL3	Brain_Caudate_basal_ganglia1	gtex	protein_coding	chr16	30089316	30089317	en	0.0924863	1.63e-05	-1.12	0.000265	0	16:29036613-16:31382470
ENSG00000131778	NA	CHD1L	Brain_Caudate_basal_ganglia1	gtex	protein_coding	chr1	146671076	146671077	en	0.259188	3.46e-14	1.03	0.000262	0	1:144977648-1:148360712
ENSG00000159692	NA	CTBP1	Brain_Caudate_basal_ganglia1	gtex	protein_coding	chr4	1235787	1235788	en	0.0473549	0.00230365	0.933	0.000261	0	4:695146-4:1478711
ENSG00000089094	NA	KDM2B	Brain_Caudate_basal_ganglia1	gtex	protein_coding	chr12	121983957	121983958	en	0.039298	0.00559132	0.893	0.000258	0	12:122009763-12:124976982
ENSG00000163545	NA	NUAK2	Brain_Caudate_basal_ganglia1	gtex	protein_coding	chr1	205285035	205285036	en	0.0998052	7.21e-06	0.94	0.000256	0	1:204681068-1:205922403
ENSG00000138758	NA	SEPTIN11	Brain_Caudate_basal_ganglia1	gtex	protein_coding	chr4	77915479	77915480	en	0.086969	2.99e-05	0.903	0.000254	0	4:77130707-4:79093979
ENSG00000187688	NA	TRPV2	Brain_Caudate_basal_ganglia1	gtex	protein_coding	chr17	16346526	16346527	en	0.280285	2.08e-15	-1.28	0.000251	0	17:15020965-17:16411522
ENSG00000163686	NA	ABHD6	Brain_Caudate_basal_ganglia1	gtex	protein_coding	chr3	58250171	58250172	en	0.0870567	2.96e-05	0.975	0.00025	0	3:58157850-3:60272829
ENSG00000260953	NA	AC009093.4	Brain_Caudate_basal_ganglia1	gtex	lncRNA	chr16	29279228	29279229	en	0.27581	3.8e-15	0.549	0.00025	0	16:29036613-16:31382470
ENSG00000133059	NA	DSTYK	Brain_Caudate_basal_ganglia1	gtex	protein_coding	chr1	205131767	205131768	en	0.151112	2.13e-08	-0.773	0.00025	0	1:204681068-1:205922403
ENSG00000225855	NA	RUSC1-AS1	Brain_Caudate_basal_ganglia1	gtex	lncRNA	chr1	155335325	155335326	en	0.108375	2.77e-06	-0.506	0.00025	0	1:154770403-1:156336133
ENSG00000198933	NA	TBKBP1	Brain_Caudate_basal_ganglia1	gtex	protein_coding	chr17	45598457	45598458	en	0.035094	0.00890725	0.871	0.00025	0	17:43056905-17:45876022
ENSG00000138767	NA	CNOT6L	Brain_Caudate_basal_ganglia1	gtex	protein_coding	chr4	79030982	79030983	en	0.180523	6.63e-10	0.917	0.000249	0	4:77130707-4:79093979
ENSG00000196735	NA	HLA-DQA1	Brain_Caudate_basal_ganglia1	gtex	protein_coding	chr6	32605513	32605514	en	0.255752	5.43e-14	-0.943	0.000249	0	6:31571337-6:32682664
ENSG00000258144	NA	LINC02406	Brain_Caudate_basal_ganglia1	gtex	lncRNA	chr12	39485951	39485952	en	0.0936342	1.43e-05	0.951	0.000249	0	12:39227446-12:40816185
ENSG00000204421	NA	LY6G6C	Brain_Caudate_basal_ganglia1	gtex	protein_coding	chr6	32063443	32063444	en	0.085236	3.62e-05	-0.874	0.000248	0	6:31571337-6:32682664
ENSG00000242252	NA	BGLAP	Brain_Caudate_basal_ganglia1	gtex	protein_coding	chr1	156275336	156275337	en	0.126664	3.53e-07	0.79	0.000247	0	1:154770403-1:156336133
ENSG00000224389	NA	C4B	Brain_Caudate_basal_ganglia1	gtex	protein_coding	chr6	31994176	31994177	en	0.130792	2.21e-07	-0.698	0.000246	0	6:31571337-6:32682664
ENSG00000239704	NA	CDRT4	Brain_Caudate_basal_ganglia1	gtex	protein_coding	chr17	15356321	15356322	en	0.399905	4.62e-23	-0.359	0.000246	0	17:15020965-17:16411522
ENSG00000160781	NA	PAQR6	Brain_Caudate_basal_ganglia1	gtex	protein_coding	chr1	156241756	156241757	en	0.0426471	0.00386476	0.737	0.000246	0	1:154770403-1:156336133
ENSG00000169592	NA	INO80E	Brain_Caudate_basal_ganglia1	gtex	protein_coding	chr16	30014378	30014379	en	0.145147	4.25e-08	0.26	0.000245	0	16:29036613-16:31382470
ENSG00000196378	NA	ZNF34	Brain_Caudate_basal_ganglia1	gtex	protein_coding	chr8	146008976	146008977	en	0.132792	1.76e-07	0.943	0.000243	0	8:144236881-8:146303788
ENSG00000136235	NA	GPNMB	Brain_Caudate_basal_ganglia1	gtex	protein_coding	chr7	23353116	23353117	en	0.299961	1.41e-16	0.953	0.000241	0	7:22508611-7:23469560
ENSG00000159674	NA	SPON2	Brain_Caudate_basal_ganglia1	gtex	protein_coding	chr4	1158767	1158768	en	0.169564	2.44e-09	-0.88	0.000241	0	4:695146-4:1478711
ENSG00000163872	NA	YEATS2	Brain_Caudate_basal_ganglia1	gtex	protein_coding	chr3	183458393	183458394	en	0.0206914	0.0453925	0.938	0.000241	0	3:181511166-3:183769683
ENSG00000265519	NA	AC015922.2	Brain_Caudate_basal_ganglia1	gtex	lncRNA	chr17	15693335	15693336	en	0.0839204	4.18e-05	0.549	0.00024	0	17:15020965-17:16411522
ENSG00000276855	NA	AC015922.3	Brain_Caudate_basal_ganglia1	gtex	lncRNA	chr17	15706572	15706573	en	0.130988	2.16e-07	0.549	0.00024	0	17:15020965-17:16411522
ENSG00000197858	NA	GPAA1	Brain_Caudate_basal_ganglia1	gtex	protein_coding	chr8	145113764	145113765	en	0.0864904	3.15e-05	-0.923	0.000239	0	8:144236881-8:146303788
ENSG00000260167	NA	AC093249.2	Brain_Caudate_basal_ganglia1	gtex	lncRNA	chr16	30579135	30579136	en	0.0396791	0.00536085	-0.615	0.000238	0	16:29036613-16:31382470
ENSG00000273403	NA	AC107294.3	Brain_Caudate_basal_ganglia1	gtex	lncRNA	chr3	184466469	184466470	en	0.10017	6.93e-06	-0.922	0.000237	0	3:181511166-3:183769683
ENSG00000231064	NA	AC234582.1	Brain_Caudate_basal_ganglia1	gtex	lncRNA	chr1	155181186	155181187	en	0.0373089	0.00696713	0.803	0.000237	0	1:154770403-1:156336133
ENSG00000161016	NA	RPL8	Brain_Caudate_basal_ganglia1	gtex	protein_coding	chr8	146012962	146012963	en	0.0768282	9.13e-05	-0.912	0.000237	0	8:144236881-8:146303788
ENSG00000214946	NA	TBC1D26	Brain_Caudate_basal_ganglia1	gtex	protein_coding	chr17	15651956	15651957	en	0.412327	6.11e-24	-0.317	0.000236	0	17:15020965-17:16411522
ENSG00000167700	NA	MFSD3	Brain_Caudate_basal_ganglia1	gtex	protein_coding	chr8	144999345	144999346	en	0.0220436	0.038823	0.902	0.000235	0	8:144236881-8:146303788
ENSG00000170619	NA	COMMD5	Brain_Caudate_basal_ganglia1	gtex	protein_coding	chr8	146074804	146074805	en	0.0642544	0.000362143	-0.895	0.000233	0	8:144236881-8:146303788
ENSG00000188026	NA	RILPL1	Brain_Caudate_basal_ganglia1	gtex	protein_coding	chr12	123987127	123987128	en	0.0860565	3.31e-05	-0.758	0.000231	0	12:122009763-12:124976982
ENSG00000253741	NA	LNCOC1	Brain_Caudate_basal_ganglia1	gtex	lncRNA	chr8	143747736	143747737	en	0.383912	5.89e-22	0.874	0.000229	0	8:144236881-8:146303788
ENSG00000198952	NA	SMG5	Brain_Caudate_basal_ganglia1	gtex	protein_coding	chr1	156265976	156265977	en	0.0840798	4.11e-05	0.593	0.000227	0	1:154770403-1:156336133
ENSG00000117266	NA	CDK18	Brain_Caudate_basal_ganglia1	gtex	protein_coding	chr1	205240812	205240813	en	0.0959275	1.11e-05	0.767	0.000226	0	1:204681068-1:205922403
ENSG00000196126	NA	HLA-DRB1	Brain_Caudate_basal_ganglia1	gtex	protein_coding	chr6	32515607	32515608	en	0.368821	6.13e-21	0.822	0.000226	0	6:31571337-6:32682664
ENSG00000172318	NA	B3GALT1	Brain_Caudate_basal_ganglia1	gtex	protein_coding	chr2	168744887	168744888	en	0.0294619	0.016708	0.251	0.000225	0	2:167356254-2:169968112
ENSG00000213658	NA	LAT	Brain_Caudate_basal_ganglia1	gtex	protein_coding	chr16	28968918	28968919	en	0.0684413	0.000228993	-0.129	0.000225	0	16:29036613-16:31382470
ENSG00000198064	NA	NPIPB13	Brain_Caudate_basal_ganglia1	gtex	protein_coding	chr16	30247422	30247423	en	0.020361	0.0471677	-0.137	0.000224	0	16:29036613-16:31382470
ENSG00000163945	NA	UVSSA	Brain_Caudate_basal_ganglia1	gtex	protein_coding	chr4	1362781	1362782	en	0.420687	1.53e-24	-0.502	0.000224	0	4:695146-4:1478711
ENSG00000272221	NA	AL645933.2	Brain_Caudate_basal_ganglia1	gtex	lncRNA	chr6	31040303	31040304	en	0.517392	3.36e-32	0.804	0.000223	0	6:31571337-6:32682664
ENSG00000103485	NA	QPRT	Brain_Caudate_basal_ganglia1	gtex	protein_coding	chr16	29675566	29675567	en	0.178453	8.49e-10	0.0596	0.000223	0	16:29036613-16:31382470
ENSG00000237188	NA	AC242426.2	Brain_Caudate_basal_ganglia1	gtex	lncRNA	chr1	146692268	146692269	en	0.153658	1.58e-08	0.845	0.000222	0	1:144977648-1:148360712
ENSG00000152931	NA	PART1	Brain_Caudate_basal_ganglia1	gtex	lncRNA	chr5	59799442	59799443	en	0.0991067	7.8e-06	0.76	0.00022	0	5:58524622-5:60935451
ENSG00000120071	NA	KANSL1	Brain_Caudate_basal_ganglia1	gtex	protein_coding	chr17	44193573	44193574	en	0.274658	4.43e-15	-5.73	0.000218	0	17:43056905-17:45876022
ENSG00000174514	NA	MFSD4A	Brain_Caudate_basal_ganglia1	gtex	protein_coding	chr1	205560119	205560120	en	0.127339	3.27e-07	-0.559	0.000218	0	1:204681068-1:205922403
ENSG00000240053	NA	LY6G5B	Brain_Caudate_basal_ganglia1	gtex	protein_coding	chr6	31641040	31641041	en	0.303049	9.15e-17	0.718	0.000216	0	6:31571337-6:32682664
ENSG00000180921	NA	FAM83H	Brain_Caudate_basal_ganglia1	gtex	protein_coding	chr8	144817015	144817016	en	0.133908	1.55e-07	0.792	0.000214	0	8:144236881-8:146303788
ENSG00000204241	NA	LINC02731	Brain_Caudate_basal_ganglia1	gtex	lncRNA	chr11	133909537	133909538	en	0.327029	3.06e-18	0.799	0.000214	0	11:133000260-11:134205993
ENSG00000204344	NA	STK19	Brain_Caudate_basal_ganglia1	gtex	protein_coding	chr6	31941828	31941829	en	0.0216585	0.0405861	0.454	0.000214	0	6:31571337-6:32682664
ENSG00000254648	NA	AP000911.1	Brain_Caudate_basal_ganglia1	gtex	lncRNA	chr11	133906038	133906039	en	0.0471582	0.00235391	0.79	0.000212	0	11:133000260-11:134205993
ENSG00000179344	NA	HLA-DQB1	Brain_Caudate_basal_ganglia1	gtex	protein_coding	chr6	32715264	32715265	en	0.606776	8.96e-41	0.438	0.000212	0	6:31571337-6:32682664
ENSG00000237765	NA	FAM200B	Brain_Caudate_basal_ganglia1	gtex	protein_coding	chr4	15684987	15684988	en	0.16446	4.47e-09	3.71	0.000211	0	4:15147446-4:15926136
ENSG00000147813	NA	NAPRT	Brain_Caudate_basal_ganglia1	gtex	protein_coding	chr8	144659377	144659378	en	0.592963	2.49e-39	0.772	0.000211	0	8:144236881-8:146303788
ENSG00000231852	NA	CYP21A2	Brain_Caudate_basal_ganglia1	gtex	protein_coding	chr6	32010034	32010035	en	0.155415	1.29e-08	-0.418	0.000209	0	6:31571337-6:32682664
ENSG00000076003	NA	MCM6	Brain_Caudate_basal_ganglia1	gtex	protein_coding	chr2	136598929	136598930	en	0.138418	9.22e-08	0.764	0.000209	0	2:135159453-2:137042794
ENSG00000247373	NA	TMED2-DT	Brain_Caudate_basal_ganglia1	gtex	lncRNA	chr12	124055828	124055829	en	0.0654362	0.000318204	0.592	0.000208	0	12:122009763-12:124976982
ENSG00000198825	NA	INPP5F	Brain_Caudate_basal_ganglia1	gtex	protein_coding	chr10	121548979	121548980	en	0.0510178	0.0015417	-0.638	0.000207	0	10:120591693-10:122407323
ENSG00000170382	NA	LRRN2	Brain_Caudate_basal_ganglia1	gtex	protein_coding	chr1	204646396	204646397	en	0.0394421	0.00550299	-0.256	0.000206	0	1:204681068-1:205922403
ENSG00000139714	NA	MORN3	Brain_Caudate_basal_ganglia1	gtex	protein_coding	chr12	122100559	122100560	en	0.101517	5.96e-06	0.605	0.000206	0	12:122009763-12:124976982
ENSG00000168778	NA	TCTN2	Brain_Caudate_basal_ganglia1	gtex	protein_coding	chr12	124164800	124164801	en	0.275536	3.94e-15	0.618	0.000206	0	12:122009763-12:124976982
ENSG00000255224	NA	AC109322.1	Brain_Caudate_basal_ganglia1	gtex	lncRNA	chr8	145111423	145111424	en	0.0502836	0.00167087	0.725	0.000204	0	8:144236881-8:146303788
ENSG00000158113	NA	LRRC43	Brain_Caudate_basal_ganglia1	gtex	protein_coding	chr12	122706689	122706690	en	0.0455897	0.00279633	0.564	0.000202	0	12:122009763-12:124976982
ENSG00000174502	NA	SLC26A9	Brain_Caudate_basal_ganglia1	gtex	protein_coding	chr1	205825420	205825421	en	0.0862881	3.22e-05	-0.292	0.000202	0	1:204681068-1:205922403
ENSG00000133069	NA	TMCC2	Brain_Caudate_basal_ganglia1	gtex	protein_coding	chr1	205231358	205231359	en	0.153967	1.53e-08	0.0255	0.000202	0	1:204681068-1:205922403
ENSG00000172992	NA	DCAKD	Brain_Caudate_basal_ganglia1	gtex	protein_coding	chr17	43120604	43120605	en	0.105361	3.88e-06	-1.92	0.000201	0	17:43056905-17:45876022
ENSG00000188613	NA	NANOS1	Brain_Caudate_basal_ganglia1	gtex	protein_coding	chr10	120816204	120816205	en	0.0477606	0.00220336	0.645	0.000201	0	10:120591693-10:122407323
ENSG00000152214	NA	RIT2	Brain_Caudate_basal_ganglia1	gtex	protein_coding	chr18	40527162	40527163	en	0.124254	4.64e-07	-0.717	0.000201	0	18:39892648-18:42921854
ENSG00000213676	NA	ATF6B	Brain_Caudate_basal_ganglia1	gtex	protein_coding	chr6	32117215	32117216	en	0.148491	2.88e-08	0.619	0.000199	0	6:31571337-6:32682664
ENSG00000188725	NA	SMIM15	Brain_Caudate_basal_ganglia1	gtex	protein_coding	chr5	60297965	60297966	en	0.0363172	0.0077764	0.361	0.000199	0	5:58524622-5:60935451
ENSG00000278112	NA	AC145423.3	Brain_Caudate_basal_ganglia1	gtex	lncRNA	chr12	124018593	124018594	en	0.0208184	0.0447289	-0.512	0.000198	0	12:122009763-12:124976982
ENSG00000177628	NA	GBA	Brain_Caudate_basal_ganglia1	gtex	protein_coding	chr1	154928043	154928044	en	0.0247531	0.0284612	0.406	0.000198	0	1:154770403-1:156336133
ENSG00000086598	NA	TMED2	Brain_Caudate_basal_ganglia1	gtex	protein_coding	chr12	124077616	124077617	en	0.0294465	0.0167369	-0.548	0.000198	0	12:122009763-12:124976982
ENSG00000196189	NA	SEMA4A	Brain_Caudate_basal_ganglia1	gtex	protein_coding	chr1	156134711	156134712	en	0.057442	0.000763094	-0.428	0.000197	0	1:154770403-1:156336133
ENSG00000255050	NA	AC067930.4	Brain_Caudate_basal_ganglia1	gtex	lncRNA	chr8	144659081	144659082	en	0.225812	2.54e-12	0.666	0.000196	0	8:144236881-8:146303788
ENSG00000183955	NA	KMT5A	Brain_Caudate_basal_ganglia1	gtex	protein_coding	chr12	123840828	123840829	en	0.102798	5.17e-06	0.499	0.000195	0	12:122009763-12:124976982
ENSG00000133818	NA	RRAS2	Brain_Caudate_basal_ganglia1	gtex	protein_coding	chr11	14349337	14349338	en	0.0837979	4.24e-05	0.663	0.000194	0	11:13373433-11:15742397
ENSG00000198535	NA	C2CD4A	Brain_Caudate_basal_ganglia1	gtex	protein_coding	chr15	62371456	62371457	en	0.056811	0.000817645	-0.66	0.000193	0	15:61266132-15:63215222
ENSG00000213722	NA	DDAH2	Brain_Caudate_basal_ganglia1	gtex	protein_coding	chr6	31669104	31669105	en	0.0547251	0.0010273	0.491	0.000193	0	6:31571337-6:32682664
ENSG00000138764	NA	CCNG2	Brain_Caudate_basal_ganglia1	gtex	protein_coding	chr4	78048283	78048284	en	0.0461532	0.0026285	0.526	0.000192	0	4:77130707-4:79093979
ENSG00000164181	NA	ELOVL7	Brain_Caudate_basal_ganglia1	gtex	protein_coding	chr5	59824696	59824697	en	0.01987	0.0499406	0.425	0.000191	0	5:58524622-5:60935451
ENSG00000127418	NA	FGFRL1	Brain_Caudate_basal_ganglia1	gtex	protein_coding	chr4	1045675	1045676	en	0.0395138	0.00545957	-0.281	0.000191	0	4:695146-4:1478711
ENSG00000243384	NA	AC119424.1	Brain_Caudate_basal_ganglia1	gtex	lncRNA	chr3	58548814	58548815	en	0.0840471	4.13e-05	-0.612	0.00019	0	3:58157850-3:60272829
ENSG00000111364	NA	DDX55	Brain_Caudate_basal_ganglia1	gtex	protein_coding	chr12	124104411	124104412	en	0.311098	2.96e-17	-0.409	0.00019	0	12:122009763-12:124976982
ENSG00000178882	NA	RFLNA	Brain_Caudate_basal_ganglia1	gtex	protein_coding	chr12	124612190	124612191	en	0.0257605	0.025379	0.445	0.000189	0	12:122009763-12:124976982
ENSG00000198715	NA	GLMP	Brain_Caudate_basal_ganglia1	gtex	protein_coding	chr1	156260065	156260066	en	0.0636671	0.000386179	0.0671	0.000188	0	1:154770403-1:156336133
ENSG00000168297	NA	PXK	Brain_Caudate_basal_ganglia1	gtex	protein_coding	chr3	58367037	58367038	en	0.133677	1.59e-07	0.602	0.000188	0	3:58157850-3:60272829
ENSG00000163468	NA	CCT3	Brain_Caudate_basal_ganglia1	gtex	protein_coding	chr1	156289087	156289088	en	0.0388123	0.00589957	-0.0953	0.000186	0	1:154770403-1:156336133
ENSG00000131781	NA	FMO5	Brain_Caudate_basal_ganglia1	gtex	protein_coding	chr1	146730786	146730787	en	0.111908	1.87e-06	-0.591	0.000186	0	1:144977648-1:148360712
ENSG00000139116	NA	KIF21A	Brain_Caudate_basal_ganglia1	gtex	protein_coding	chr12	39823548	39823549	en	0.056655	0.000831724	-0.503	0.000186	0	12:39227446-12:40816185
ENSG00000179632	NA	MAF1	Brain_Caudate_basal_ganglia1	gtex	protein_coding	chr8	145146617	145146618	en	0.147407	3.27e-08	0.582	0.000186	0	8:144236881-8:146303788
ENSG00000078070	NA	MCCC1	Brain_Caudate_basal_ganglia1	gtex	protein_coding	chr3	182803976	182803977	en	0.265393	1.52e-14	-0.596	0.000186	0	3:181511166-3:183769683
ENSG00000104219	NA	ZDHHC2	Brain_Caudate_basal_ganglia1	gtex	protein_coding	chr8	17058937	17058938	en	0.023968	0.0311292	0.597	0.000186	0	8:15991660-8:17387624
ENSG00000185344	NA	ATP6V0A2	Brain_Caudate_basal_ganglia1	gtex	protein_coding	chr12	124246595	124246596	en	0.143584	5.09e-08	0.277	0.000185	0	12:122009763-12:124976982
ENSG00000243649	NA	CFB	Brain_Caudate_basal_ganglia1	gtex	protein_coding	chr6	31850685	31850686	en	0.0971478	9.69e-06	0.487	0.000185	0	6:31571337-6:32682664
ENSG00000204394	NA	VARS	Brain_Caudate_basal_ganglia1	gtex	protein_coding	chr6	31754324	31754325	en	0.0341776	0.00986263	-0.474	0.000185	0	6:31571337-6:32682664
ENSG00000256092	NA	SBNO1-AS1	Brain_Caudate_basal_ganglia1	gtex	lncRNA	chr12	123849135	123849136	en	0.239192	4.63e-13	0.354	0.000184	0	12:122009763-12:124976982
ENSG00000168477	NA	TNXB	Brain_Caudate_basal_ganglia1	gtex	protein_coding	chr6	32101823	32101824	en	0.0461681	0.0026242	0.47	0.000184	0	6:31571337-6:32682664
ENSG00000198502	NA	HLA-DRB5	Brain_Caudate_basal_ganglia1	gtex	protein_coding	chr6	32490471	32490472	en	0.662235	3.94e-47	0.469	0.000183	0	6:31571337-6:32682664
ENSG00000155970	NA	MICU3	Brain_Caudate_basal_ganglia1	gtex	protein_coding	chr8	17006997	17006998	en	0.10941	2.47e-06	0.545	0.000181	0	8:15991660-8:17387624
ENSG00000104524	NA	PYCR3	Brain_Caudate_basal_ganglia1	gtex	protein_coding	chr8	144683389	144683390	en	0.227708	2e-12	0.527	0.000181	0	8:144236881-8:146303788
ENSG00000242686	NA	AC107464.1	Brain_Caudate_basal_ganglia1	gtex	lncRNA	chr4	662962	662963	en	0.449689	1.07e-26	0.182	0.00018	0	4:695146-4:1478711
ENSG00000136448	NA	NMT1	Brain_Caudate_basal_ganglia1	gtex	protein_coding	chr17	43148798	43148799	en	0.178395	8.55e-10	2.09	0.00018	0	17:43056905-17:45876022
ENSG00000003989	NA	SLC7A2	Brain_Caudate_basal_ganglia1	gtex	protein_coding	chr8	17411740	17411741	en	0.0938069	1.4e-05	-0.536	0.00018	0	8:15991660-8:17387624
ENSG00000179526	NA	SHARPIN	Brain_Caudate_basal_ganglia1	gtex	protein_coding	chr8	145174676	145174677	en	0.0605568	0.000542729	-0.505	0.000179	0	8:144236881-8:146303788
ENSG00000204428	NA	LY6G5C	Brain_Caudate_basal_ganglia1	gtex	protein_coding	chr6	31616204	31616205	en	0.535933	7.67e-34	0.353	0.000178	0	6:31571337-6:32682664
ENSG00000179886	NA	TIGD5	Brain_Caudate_basal_ganglia1	gtex	protein_coding	chr8	144706044	144706045	en	0.0360081	0.0080476	-0.486	0.000177	0	8:144236881-8:146303788
ENSG00000179698	NA	WDR97	Brain_Caudate_basal_ganglia1	gtex	protein_coding	chr8	145119471	145119472	en	0.519116	2.38e-32	0.487	0.000177	0	8:144236881-8:146303788
ENSG00000108424	NA	KPNB1	Brain_Caudate_basal_ganglia1	gtex	protein_coding	chr17	45758517	45758518	en	0.0355711	0.00844758	0.768	0.000176	0	17:43056905-17:45876022
ENSG00000272172	NA	AC138696.2	Brain_Caudate_basal_ganglia1	gtex	lncRNA	chr8	144360279	144360280	en	0.101268	6.13e-06	-0.459	0.000175	0	8:144236881-8:146303788
ENSG00000187954	NA	CYHR1	Brain_Caudate_basal_ganglia1	gtex	protein_coding	chr8	145687520	145687521	en	0.129138	2.66e-07	-0.46	0.000175	0	8:144236881-8:146303788
ENSG00000184209	NA	SNRNP35	Brain_Caudate_basal_ganglia1	gtex	protein_coding	chr12	123959692	123959693	en	0.0589285	0.000648561	0.0747	0.000174	0	12:122009763-12:124976982
ENSG00000120008	NA	WDR11	Brain_Caudate_basal_ganglia1	gtex	protein_coding	chr10	122562073	122562074	en	0.362905	1.51e-20	-0.31	0.000172	0	10:120591693-10:122407323
ENSG00000151498	NA	ACAD8	Brain_Caudate_basal_ganglia1	gtex	protein_coding	chr11	134177705	134177706	en	0.0221143	0.0385076	0.426	0.000171	0	11:133000260-11:134205993
ENSG00000160949	NA	TONSL	Brain_Caudate_basal_ganglia1	gtex	protein_coding	chr8	145668243	145668244	en	0.102221	5.51e-06	-0.408	0.000171	0	8:144236881-8:146303788
ENSG00000204438	NA	GPANK1	Brain_Caudate_basal_ganglia1	gtex	protein_coding	chr6	31670287	31670288	en	0.0358183	0.0082189	-0.199	0.00017	0	6:31571337-6:32682664
ENSG00000137411	NA	VARS2	Brain_Caudate_basal_ganglia1	gtex	protein_coding	chr6	30794714	30794715	en	0.411189	7.37e-24	-0.198	0.00017	0	6:31571337-6:32682664
ENSG00000204396	NA	VWA7	Brain_Caudate_basal_ganglia1	gtex	protein_coding	chr6	31866081	31866082	en	0.0661527	0.000294202	-0.172	0.00017	0	6:31571337-6:32682664
ENSG00000204427	NA	ABHD16A	Brain_Caudate_basal_ganglia1	gtex	protein_coding	chr6	31673529	31673530	en	0.0386565	0.00600203	-0.0597	0.000169	0	6:31571337-6:32682664
ENSG00000259370	NA	AC103740.1	Brain_Caudate_basal_ganglia1	gtex	lncRNA	chr15	63118007	63118008	en	0.0682129	0.000234791	0.406	0.000169	0	15:61266132-15:63215222
ENSG00000259251	NA	AC104590.1	Brain_Caudate_basal_ganglia1	gtex	lncRNA	chr15	62356723	62356724	en	0.145773	3.95e-08	0.393	0.000169	0	15:61266132-15:63215222
ENSG00000197601	NA	FAR1	Brain_Caudate_basal_ganglia1	gtex	protein_coding	chr11	13736495	13736496	en	0.0267199	0.022763	0.391	0.000168	0	11:13373433-11:15742397
ENSG00000204315	NA	FKBPL	Brain_Caudate_basal_ganglia1	gtex	protein_coding	chr6	32078269	32078270	en	0.048566	0.00201706	0.15	0.000168	0	6:31571337-6:32682664
ENSG00000181097	NA	AC105219.1	Brain_Caudate_basal_ganglia1	gtex	lncRNA	chr8	144779724	144779725	en	0.117705	9.72e-07	0.337	0.000167	0	8:144236881-8:146303788
ENSG00000198791	NA	CNOT7	Brain_Caudate_basal_ganglia1	gtex	protein_coding	chr8	17287946	17287947	en	0.181659	5.78e-10	-0.362	0.000167	0	8:15991660-8:17387624
ENSG00000147804	NA	SLC39A4	Brain_Caudate_basal_ganglia1	gtex	protein_coding	chr8	145606894	145606895	en	0.0806716	5.98e-05	0.335	0.000167	0	8:144236881-8:146303788
ENSG00000254973	NA	AC105219.4	Brain_Caudate_basal_ganglia1	gtex	lncRNA	chr8	144846540	144846541	en	0.0277625	0.0202321	-0.317	0.000166	0	8:144236881-8:146303788
ENSG00000273179	NA	AC092535.5	Brain_Caudate_basal_ganglia1	gtex	lncRNA	chr4	1158767	1158768	en	0.0650464	0.000332074	0.236	0.000165	0	4:695146-4:1478711
ENSG00000213563	NA	C8orf82	Brain_Caudate_basal_ganglia1	gtex	protein_coding	chr8	145745803	145745804	en	0.0509663	0.00155043	0.308	0.000165	0	8:144236881-8:146303788
ENSG00000274372	NA	LINC02804	Brain_Caudate_basal_ganglia1	gtex	lncRNA	chr1	147490588	147490589	en	0.0767567	9.2e-05	0.334	0.000165	0	1:144977648-1:148360712
ENSG00000197363	NA	ZNF517	Brain_Caudate_basal_ganglia1	gtex	protein_coding	chr8	146065429	146065430	en	0.124361	4.58e-07	-0.302	0.000165	0	8:144236881-8:146303788
ENSG00000148908	NA	RGS10	Brain_Caudate_basal_ganglia1	gtex	protein_coding	chr10	121290945	121290946	en	0.0388955	0.00584558	0.0282	0.000164	0	10:120591693-10:122407323
ENSG00000144224	NA	UBXN4	Brain_Caudate_basal_ganglia1	gtex	protein_coding	chr2	136851721	136851722	en	0.0593739	0.000617716	-0.0726	0.000164	0	2:135159453-2:137042794
ENSG00000178209	NA	PLEC	Brain_Caudate_basal_ganglia1	gtex	protein_coding	chr8	145008092	145008093	en	0.125975	3.82e-07	-0.262	0.000163	0	8:144236881-8:146303788
ENSG00000160948	NA	VPS28	Brain_Caudate_basal_ganglia1	gtex	protein_coding	chr8	145613178	145613179	en	0.33984	4.74e-19	-0.255	0.000163	0	8:144236881-8:146303788
ENSG00000114770	NA	ABCC5	Brain_Caudate_basal_ganglia1	gtex	protein_coding	chr3	183688028	183688029	en	0.228108	1.9e-12	0.263	0.000162	0	3:181511166-3:183769683
ENSG00000169026	NA	SLC49A3	Brain_Caudate_basal_ganglia1	gtex	protein_coding	chr4	701314	701315	en	0.100068	7.01e-06	0.0907	0.000162	0	4:695146-4:1478711
ENSG00000139117	NA	CPNE8	Brain_Caudate_basal_ganglia1	gtex	protein_coding	chr12	39163762	39163763	en	0.0719947	0.000155142	-0.0396	0.000161	0	12:39227446-12:40816185
ENSG00000280927	NA	CTBP1-AS	Brain_Caudate_basal_ganglia1	gtex	lncRNA	chr4	1225106	1225107	en	0.0572702	0.000777577	-0.161	0.000161	0	4:695146-4:1478711
ENSG00000163684	NA	RPP14	Brain_Caudate_basal_ganglia1	gtex	protein_coding	chr3	58261556	58261557	en	0.123331	5.15e-07	0.181	0.000161	0	3:58157850-3:60272829
ENSG00000071894	NA	CPSF1	Brain_Caudate_basal_ganglia1	gtex	protein_coding	chr8	145637775	145637776	en	0.663351	2.86e-47	0.15	0.00016	0	8:144236881-8:146303788
ENSG00000007062	NA	PROM1	Brain_Caudate_basal_ganglia1	gtex	protein_coding	chr4	15837928	15837929	en	0.144222	4.73e-08	1.08	0.00016	0	4:15147446-4:15926136
ENSG00000183309	NA	ZNF623	Brain_Caudate_basal_ganglia1	gtex	protein_coding	chr8	144718522	144718523	en	0.349308	1.17e-19	-0.153	0.00016	0	8:144236881-8:146303788
ENSG00000254812	NA	AC067930.2	Brain_Caudate_basal_ganglia1	gtex	lncRNA	chr8	144720874	144720875	en	0.27784	2.89e-15	0.13	0.000159	0	8:144236881-8:146303788
ENSG00000204839	NA	MROH6	Brain_Caudate_basal_ganglia1	gtex	protein_coding	chr8	144622282	144622283	en	0.181555	5.86e-10	0.131	0.000159	0	8:144236881-8:146303788
ENSG00000272824	NA	AC245100.6	Brain_Caudate_basal_ganglia1	gtex	lncRNA	chr1	147782949	147782950	en	0.0672434	0.000261088	-0.116	0.000158	0	1:144977648-1:148360712
ENSG00000058063	NA	ATP11B	Brain_Caudate_basal_ganglia1	gtex	protein_coding	chr3	182550645	182550646	en	0.0630454	0.000413364	-0.122	0.000158	0	3:181511166-3:183769683
ENSG00000242428	NA	C3orf67-AS1	Brain_Caudate_basal_ganglia1	gtex	lncRNA	chr3	58812156	58812157	en	0.15805	9.48e-09	-0.0458	0.000158	0	3:58157850-3:60272829
ENSG00000166105	NA	GLB1L3	Brain_Caudate_basal_ganglia1	gtex	protein_coding	chr11	134114802	134114803	en	0.0286622	0.0182806	0.141	0.000158	0	11:133000260-11:134205993
ENSG00000250571	NA	GLI4	Brain_Caudate_basal_ganglia1	gtex	protein_coding	chr8	144335646	144335647	en	0.02922	0.0171684	0.0705	0.000158	0	8:144236881-8:146303788
ENSG00000104518	NA	GSDMD	Brain_Caudate_basal_ganglia1	gtex	protein_coding	chr8	144633905	144633906	en	0.33073	1.79e-18	0.0185	0.000158	0	8:144236881-8:146303788
ENSG00000253716	NA	MINCR	Brain_Caudate_basal_ganglia1	gtex	lncRNA	chr8	144363193	144363194	en	0.371595	4e-21	-0.0251	0.000158	0	8:144236881-8:146303788
ENSG00000158106	NA	RHPN1	Brain_Caudate_basal_ganglia1	gtex	protein_coding	chr8	144456419	144456420	en	0.0514738	0.00146658	-0.0147	0.000158	0	8:144236881-8:146303788
ENSG00000232600	NA	TONSL-AS1	Brain_Caudate_basal_ganglia1	gtex	lncRNA	chr8	145657327	145657328	en	0.0365252	0.00759912	0.0172	0.000158	0	8:144236881-8:146303788
ENSG00000184428	NA	TOP1MT	Brain_Caudate_basal_ganglia1	gtex	protein_coding	chr8	144406615	144406616	en	0.134881	1.38e-07	-0.0282	0.000158	0	8:144236881-8:146303788
ENSG00000185730	NA	ZNF696	Brain_Caudate_basal_ganglia1	gtex	protein_coding	chr8	144380704	144380705	en	0.11573	1.21e-06	-0.0606	0.000158	0	8:144236881-8:146303788
ENSG00000265241	NA	RBM8A	Brain_Caudate_basal_ganglia1	gtex	protein_coding	chr1	145513027	145513028	en	0.0896686	2.22e-05	-0.0686	0.000157	0	1:144977648-1:148360712
ENSG00000141295	NA	SCRN2	Brain_Caudate_basal_ganglia1	gtex	protein_coding	chr17	45914181	45914182	en	0.27342	5.23e-15	-1.01	0.000157	0	17:43056905-17:45876022
ENSG00000109956	NA	B3GAT1	Brain_Caudate_basal_ganglia1	gtex	protein_coding	chr11	134253436	134253437	en	0.0753385	0.00010751	0.0143	0.000156	0	11:133000260-11:134205993
ENSG00000259207	NA	ITGB3	Brain_Caudate_basal_ganglia1	gtex	protein_coding	chr17	45403040	45403041	en	0.0510982	0.00152818	-0.672	0.000151	0	17:43056905-17:45876022
ENSG00000279685	NA	MAPT-IT1	Brain_Caudate_basal_ganglia1	gtex	lncRNA	chr17	43967069	43967070	en	0.069163	0.000211588	-5.69	0.000149	0	17:43056905-17:45876022
ENSG00000267288	NA	AC138150.2	Brain_Caudate_basal_ganglia1	gtex	lncRNA	chr17	43255767	43255768	en	0.0333104	0.0108625	-0.807	0.000134	0	17:43056905-17:45876022
ENSG00000176681	NA	LRRC37A	Brain_Caudate_basal_ganglia1	gtex	protein_coding	chr17	44387998	44387999	en	0.594686	1.66e-39	-2.14	0.00013	0	17:43056905-17:45876022
ENSG00000278765	NA	AC004477.3	Brain_Caudate_basal_ganglia1	gtex	lncRNA	chr17	46188434	46188435	en	0.0587411	0.000661993	-0.269	0.000128	0	17:43056905-17:45876022
ENSG00000108379	NA	WNT3	Brain_Caudate_basal_ganglia1	gtex	protein_coding	chr17	44894707	44894708	en	0.39843	5.86e-23	-3.82	0.000128	0	17:43056905-17:45876022
ENSG00000108433	NA	GOSR2	Brain_Caudate_basal_ganglia1	gtex	protein_coding	chr17	45365116	45365117	en	0.0340186	0.0100387	-1.7	0.000126	0	17:43056905-17:45876022
ENSG00000262879	NA	AC005670.3	Brain_Caudate_basal_ganglia1	gtex	lncRNA	chr17	45098866	45098867	en	0.516244	4.22e-32	-0.613	0.000125	0	17:43056905-17:45876022
ENSG00000181513	NA	ACBD4	Brain_Caudate_basal_ganglia1	gtex	protein_coding	chr17	43165593	43165594	en	0.100487	6.69e-06	0.54	0.000125	0	17:43056905-17:45876022
ENSG00000178852	NA	EFCAB13	Brain_Caudate_basal_ganglia1	gtex	protein_coding	chr17	45459424	45459425	en	0.171806	1.87e-09	-0.389	0.000124	0	17:43056905-17:45876022
ENSG00000159111	NA	MRPL10	Brain_Caudate_basal_ganglia1	gtex	protein_coding	chr17	45881692	45881693	en	0.200645	5.79e-11	0.648	0.000124	0	17:43056905-17:45876022
ENSG00000233175	NA	AC008105.1	Brain_Caudate_basal_ganglia1	gtex	lncRNA	chr17	43312243	43312244	en	0.397681	6.61e-23	1.76	0.000116	0	17:43056905-17:45876022
ENSG00000167182	NA	SP2	Brain_Caudate_basal_ganglia1	gtex	protein_coding	chr17	45988332	45988333	en	0.0447279	0.00307405	-0.295	0.000115	0	17:43056905-17:45876022
ENSG00000263293	NA	AC068234.2	Brain_Caudate_basal_ganglia1	gtex	lncRNA	chr17	45381185	45381186	en	0.0488337	0.0019587	-0.0142	0.000114	0	17:43056905-17:45876022
ENSG00000267750	NA	RUNDC3A-AS1	Brain_Caudate_basal_ganglia1	gtex	lncRNA	chr17	42367319	42367320	en	0.0217614	0.040107	-0.362	0.000114	0	17:43056905-17:45876022
ENSG00000264920	NA	AC018521.5	Brain_Caudate_basal_ganglia1	gtex	lncRNA	chr17	45959381	45959382	en	0.22167	4.28e-12	0.0318	0.000113	0	17:43056905-17:45876022
ENSG00000189120	NA	SP6	Brain_Caudate_basal_ganglia1	gtex	protein_coding	chr17	45934085	45934086	en	0.0316984	0.0130038	-0.154	0.000113	0	17:43056905-17:45876022
ENSG00000237765	NA	FAM200B	Brain_Cerebellar_Hemisphere1	gtex	protein_coding	chr4	15679517	15679518	en	0.38673	4.14e-20	6.06	1	0	4:15147446-4:15926136
ENSG00000138722	NA	MMRN1	Brain_Cerebellar_Hemisphere1	gtex	protein_coding	chr4	90766626	90766627	en	0.132962	7.01e-07	7.36	1	0	4:90231746-4:91560677
ENSG00000117280	NA	RAB29	Brain_Cerebellar_Hemisphere1	gtex	protein_coding	chr1	205745384	205745385	en	0.201812	4.49e-10	5.87	1	0	1:204681068-1:205922403
ENSG00000130783	NA	CCDC62	Brain_Cerebellar_Hemisphere1	gtex	protein_coding	chr12	123350630	123350631	en	0.0988312	2.27e-05	5.76	0.999	0	12:122009763-12:124976982
ENSG00000138760	NA	SCARB2	Brain_Cerebellar_Hemisphere1	gtex	protein_coding	chr4	77089903	77089904	en	0.0462841	0.00424762	5.5	0.997	1	4:77130707-4:79093979
ENSG00000243368	NA	MCCC1-AS1	Brain_Cerebellar_Hemisphere1	gtex	lncRNA	chr3	182777090	182777091	en	0.0880353	6.69e-05	-4.1	0.937	1	3:181511166-3:183769683
ENSG00000078070	NA	MCCC1	Brain_Cerebellar_Hemisphere1	gtex	protein_coding	chr3	182801039	182801040	en	0.0455951	0.00454978	-0.935	0.902	0	3:181511166-3:183769683
ENSG00000080854	NA	IGSF9B	Brain_Cerebellar_Hemisphere1	gtex	protein_coding	chr11	133807462	133807463	en	0.0271893	0.0292108	-4.68	0.875	1	11:133000260-11:134205993
ENSG00000169242	NA	EFNA1	Brain_Cerebellar_Hemisphere1	gtex	protein_coding	chr1	155115765	155115766	en	0.177569	6.35e-09	4.31	0.575	1	1:154770403-1:156336133
ENSG00000178950	NA	GAK	Brain_Cerebellar_Hemisphere1	gtex	protein_coding	chr4	885842	885843	en	0.13697	4.63e-07	6.36	0.572	1	4:695146-4:1478711
ENSG00000103510	NA	KAT8	Brain_Cerebellar_Hemisphere1	gtex	protein_coding	chr16	31164545	31164546	en	0.361796	1.34e-18	-5.5	0.548	1	16:29036613-16:31382470
ENSG00000230658	NA	KLHL7-DT	Brain_Cerebellar_Hemisphere1	gtex	lncRNA	chr7	23136276	23136277	en	0.464178	3.21e-25	-4.72	0.498	1	7:22508611-7:23469560
ENSG00000189157	NA	FAM47E	Brain_Cerebellar_Hemisphere1	gtex	protein_coding	chr4	77163941	77163942	en	0.401146	5.19e-21	-4.14	0.492	0	4:77130707-4:79093979
ENSG00000136243	NA	NUPL2	Brain_Cerebellar_Hemisphere1	gtex	protein_coding	chr7	23243640	23243641	en	0.484457	1.12e-26	4.7	0.443	0	7:22508611-7:23469560
ENSG00000145214	NA	DGKQ	Brain_Cerebellar_Hemisphere1	gtex	protein_coding	chr4	978664	978665	en	0.130992	8.59e-07	-3.79	0.396	1	4:695146-4:1478711
ENSG00000178222	NA	RNF212	Brain_Cerebellar_Hemisphere1	gtex	protein_coding	chr4	1102767	1102768	en	0.154977	7.06e-08	2.07	0.375	1	4:695146-4:1478711
ENSG00000185294	NA	SPPL2C	Brain_Cerebellar_Hemisphere1	gtex	protein_coding	chr17	44025490	44025491	en	0.368775	5.14e-19	-9.33	0.334	1	17:43056905-17:45876022
ENSG00000011295	NA	TTC19	Brain_Cerebellar_Hemisphere1	gtex	protein_coding	chr17	15946193	15946194	en	0.0460537	0.00434632	-4.98	0.331	1	17:15020965-17:16411522
ENSG00000127419	NA	TMEM175	Brain_Cerebellar_Hemisphere1	gtex	protein_coding	chr4	958378	958379	en	0.180382	4.69e-09	-6.05	0.273	1	4:695146-4:1478711
ENSG00000214941	NA	ZSWIM7	Brain_Cerebellar_Hemisphere1	gtex	protein_coding	chr17	15869698	15869699	en	0.33488	4.97e-17	-4.92	0.252	1	17:15020965-17:16411522
ENSG00000227782	NA	AC002553.1	Brain_Cerebellar_Hemisphere1	gtex	lncRNA	chr17	16345409	16345410	en	0.0815405	0.000127879	4.91	0.234	1	17:15020965-17:16411522
ENSG00000136448	NA	NMT1	Brain_Cerebellar_Hemisphere1	gtex	protein_coding	chr17	43209717	43209718	en	0.132824	7.11e-07	9.28	0.208	1	17:43056905-17:45876022
ENSG00000170425	NA	ADORA2B	Brain_Cerebellar_Hemisphere1	gtex	protein_coding	chr17	15829919	15829920	en	0.271992	1.36e-13	4.84	0.173	0	17:15020965-17:16411522
ENSG00000184922	NA	FMNL1	Brain_Cerebellar_Hemisphere1	gtex	protein_coding	chr17	43296052	43296053	en	0.364383	9.41e-19	9.26	0.171	1	17:43056905-17:45876022
ENSG00000279685	NA	MAPT-IT1	Brain_Cerebellar_Hemisphere1	gtex	lncRNA	chr17	43937184	43937185	en	0.0509754	0.00266246	-9.25	0.158	1	17:43056905-17:45876022
ENSG00000133256	NA	PDE6B	Brain_Cerebellar_Hemisphere1	gtex	protein_coding	chr4	650247	650248	en	0.0817722	0.000124961	2.87	0.152	0	4:695146-4:1478711
ENSG00000167394	NA	ZNF668	Brain_Cerebellar_Hemisphere1	gtex	protein_coding	chr16	31060344	31060345	en	0.0284237	0.0257285	5.25	0.144	1	16:29036613-16:31382470
ENSG00000196118	NA	CCDC189	Brain_Cerebellar_Hemisphere1	gtex	protein_coding	chr16	30730992	30730993	en	0.0513377	0.00256827	5.23	0.132	1	16:29036613-16:31382470
ENSG00000099381	NA	SETD1A	Brain_Cerebellar_Hemisphere1	gtex	protein_coding	chr16	31014451	31014452	en	0.0520684	0.00238832	-5.18	0.106	1	16:29036613-16:31382470
ENSG00000236234	NA	AC091132.2	Brain_Cerebellar_Hemisphere1	gtex	lncRNA	chr17	44031148	44031149	en	0.120529	2.51e-06	9.17	0.0785	0	17:43056905-17:45876022
ENSG00000167395	NA	ZNF646	Brain_Cerebellar_Hemisphere1	gtex	protein_coding	chr16	31059646	31059647	en	0.0529616	0.00218547	-5.03	0.0502	0	16:29036613-16:31382470
ENSG00000152127	NA	MGAT5	Brain_Cerebellar_Hemisphere1	gtex	protein_coding	chr2	134879721	134879722	en	0.0705238	0.00038248	3.41	0.0433	0	2:135159453-2:137042794
ENSG00000247775	NA	SNCA-AS1	Brain_Cerebellar_Hemisphere1	gtex	lncRNA	chr4	90770879	90770880	en	0.220162	5.77e-11	-3.95	0.0339	0	4:90231746-4:91560677
ENSG00000264589	NA	MAPT-AS1	Brain_Cerebellar_Hemisphere1	gtex	lncRNA	chr17	43920686	43920687	en	0.113644	5.07e-06	9.06	0.0299	0	17:43056905-17:45876022
ENSG00000275263	NA	AC135048.3	Brain_Cerebellar_Hemisphere1	gtex	lncRNA	chr16	30975130	30975131	en	0.0667911	0.000554001	4.39	0.0262	0	16:29036613-16:31382470
ENSG00000004468	NA	CD38	Brain_Cerebellar_Hemisphere1	gtex	protein_coding	chr4	15822790	15822791	en	0.0618513	0.000904368	-4.17	0.0261	0	4:15147446-4:15926136
ENSG00000035499	NA	DEPDC1B	Brain_Cerebellar_Hemisphere1	gtex	protein_coding	chr5	59936301	59936302	en	0.201984	4.41e-10	-3.21	0.0233	0	5:58524622-5:60935451
ENSG00000144730	NA	IL17RD	Brain_Cerebellar_Hemisphere1	gtex	protein_coding	chr3	57314082	57314083	en	0.0283398	0.025951	3.2	0.0225	0	3:58157850-3:60272829
ENSG00000186868	NA	MAPT	Brain_Cerebellar_Hemisphere1	gtex	protein_coding	chr17	43996340	43996341	en	0.0518215	0.00244767	9.01	0.0201	0	17:43056905-17:45876022
ENSG00000127415	NA	IDUA	Brain_Cerebellar_Hemisphere1	gtex	protein_coding	chr4	1023309	1023310	en	0.0389183	0.00887587	0.177	0.0181	0	4:695146-4:1478711
ENSG00000119242	NA	CCDC92	Brain_Cerebellar_Hemisphere1	gtex	protein_coding	chr12	124435502	124435503	en	0.0542585	0.00192129	3.35	0.0175	0	12:122009763-12:124976982
ENSG00000260911	NA	AC135050.3	Brain_Cerebellar_Hemisphere1	gtex	lncRNA	chr16	31065429	31065430	en	0.238779	6.86e-12	-4.79	0.0168	0	16:29036613-16:31382470
ENSG00000168993	NA	CPLX1	Brain_Cerebellar_Hemisphere1	gtex	protein_coding	chr4	798179	798180	en	0.169989	1.43e-08	-3.42	0.0165	0	4:695146-4:1478711
ENSG00000145217	NA	SLC26A1	Brain_Cerebellar_Hemisphere1	gtex	protein_coding	chr4	967465	967466	en	0.393525	1.56e-20	4.8	0.0148	0	4:695146-4:1478711
ENSG00000165672	NA	PRDX3	Brain_Cerebellar_Hemisphere1	gtex	protein_coding	chr10	120963876	120963877	en	0.0499045	0.00296171	3.01	0.0129	0	10:120591693-10:122407323
ENSG00000158715	NA	SLC45A3	Brain_Cerebellar_Hemisphere1	gtex	protein_coding	chr1	205639494	205639495	en	0.0222559	0.0487907	-1.55	0.0118	0	1:204681068-1:205922403
ENSG00000232759	NA	AC002480.1	Brain_Cerebellar_Hemisphere1	gtex	lncRNA	chr7	22636563	22636564	en	0.0293655	0.0233609	-3.06	0.00941	0	7:22508611-7:23469560
ENSG00000152128	NA	TMEM163	Brain_Cerebellar_Hemisphere1	gtex	protein_coding	chr2	135379537	135379538	en	0.0313975	0.018984	2.89	0.00892	0	2:135159453-2:137042794
ENSG00000179195	NA	ZNF664	Brain_Cerebellar_Hemisphere1	gtex	protein_coding	chr12	124479665	124479666	en	0.0487835	0.00331128	-3.25	0.0087	0	12:122009763-12:124976982
ENSG00000273493	NA	AC098479.1	Brain_Cerebellar_Hemisphere1	gtex	lncRNA	chr3	58307876	58307877	en	0.0545368	0.00186891	2.85	0.00794	0	3:58157850-3:60272829
ENSG00000272588	NA	AC139887.4	Brain_Cerebellar_Hemisphere1	gtex	lncRNA	chr4	764930	764931	en	0.0244822	0.0386594	-2.89	0.00751	0	4:695146-4:1478711
ENSG00000260262	NA	AC139887.3	Brain_Cerebellar_Hemisphere1	gtex	lncRNA	chr4	817824	817825	en	0.0318238	0.0181779	4.25	0.00675	0	4:695146-4:1478711
ENSG00000133065	NA	SLC41A1	Brain_Cerebellar_Hemisphere1	gtex	protein_coding	chr1	205745259	205745260	en	0.0874518	7.09e-05	1.63	0.00562	0	1:204681068-1:205922403
ENSG00000262766	NA	AC135050.5	Brain_Cerebellar_Hemisphere1	gtex	lncRNA	chr16	31130016	31130017	en	0.0533784	0.00209681	-4.38	0.00498	0	16:29036613-16:31382470
ENSG00000254533	NA	AF186192.1	Brain_Cerebellar_Hemisphere1	gtex	lncRNA	chr8	145930167	145930168	en	0.0530575	0.00216474	2.65	0.00489	0	8:144236881-8:146303788
ENSG00000228696	NA	ARL17B	Brain_Cerebellar_Hemisphere1	gtex	protein_coding	chr17	44354689	44354690	en	0.45372	1.73e-24	-8.83	0.00465	0	17:43056905-17:45876022
ENSG00000224043	NA	CCNT2-AS1	Brain_Cerebellar_Hemisphere1	gtex	lncRNA	chr2	135663594	135663595	en	0.193053	1.18e-09	2.58	0.00411	0	2:135159453-2:137042794
ENSG00000249592	NA	AC139887.2	Brain_Cerebellar_Hemisphere1	gtex	lncRNA	chr4	799988	799989	en	0.172021	1.15e-08	1.17	0.0036	0	4:695146-4:1478711
ENSG00000270720	NA	AC104785.1	Brain_Cerebellar_Hemisphere1	gtex	lncRNA	chr4	89957112	89957113	en	0.144655	2.08e-07	-3	0.00358	0	4:90231746-4:91560677
ENSG00000169241	NA	SLC50A1	Brain_Cerebellar_Hemisphere1	gtex	protein_coding	chr1	155113104	155113105	en	0.0302629	0.0213127	-2.81	0.00341	0	1:154770403-1:156336133
ENSG00000188906	NA	LRRK2	Brain_Cerebellar_Hemisphere1	gtex	protein_coding	chr12	40562234	40562235	en	0.0429814	0.00590702	2.41	0.00268	0	12:39227446-12:40816185
ENSG00000082258	NA	CCNT2	Brain_Cerebellar_Hemisphere1	gtex	protein_coding	chr2	135651022	135651023	en	0.227624	2.47e-11	-2.4	0.00262	0	2:135159453-2:137042794
ENSG00000099377	NA	HSD3B7	Brain_Cerebellar_Hemisphere1	gtex	protein_coding	chr16	30967687	30967688	en	0.0255071	0.0347561	-3.18	0.00248	0	16:29036613-16:31382470
ENSG00000250091	NA	DNAH10OS	Brain_Cerebellar_Hemisphere1	gtex	lncRNA	chr12	124416628	124416629	en	0.0981502	2.43e-05	2.46	0.00193	0	12:122009763-12:124976982
ENSG00000235560	NA	AC002310.1	Brain_Cerebellar_Hemisphere1	gtex	lncRNA	chr16	30315262	30315263	en	0.0550099	0.00178314	-3.07	0.00191	0	16:29036613-16:31382470
ENSG00000163545	NA	NUAK2	Brain_Cerebellar_Hemisphere1	gtex	protein_coding	chr1	205317619	205317620	en	0.108573	8.48e-06	2.23	0.00189	0	1:204681068-1:205922403
ENSG00000261124	NA	AC135050.4	Brain_Cerebellar_Hemisphere1	gtex	lncRNA	chr16	31124292	31124293	en	0.0407277	0.00740214	0.923	0.00185	0	16:29036613-16:31382470
ENSG00000198825	NA	INPP5F	Brain_Cerebellar_Hemisphere1	gtex	protein_coding	chr10	121541862	121541863	en	0.0512688	0.0025859	-2.24	0.00181	0	10:120591693-10:122407323
ENSG00000168291	NA	PDHB	Brain_Cerebellar_Hemisphere1	gtex	protein_coding	chr3	58415424	58415425	en	0.431509	5.56e-23	-2.24	0.00176	0	3:58157850-3:60272829
ENSG00000183605	NA	SFXN4	Brain_Cerebellar_Hemisphere1	gtex	protein_coding	chr10	120915961	120915962	en	0.661846	1.38e-42	2.23	0.00176	0	10:120591693-10:122407323
ENSG00000069275	NA	NUCKS1	Brain_Cerebellar_Hemisphere1	gtex	protein_coding	chr1	205709577	205709578	en	0.0382165	0.00952458	-3.08	0.00172	0	1:204681068-1:205922403
ENSG00000188092	NA	GPR89B	Brain_Cerebellar_Hemisphere1	gtex	protein_coding	chr1	147355743	147355744	en	0.0324706	0.017021	-2.2	0.00165	0	1:144977648-1:148360712
ENSG00000163749	NA	CCDC158	Brain_Cerebellar_Hemisphere1	gtex	protein_coding	chr4	77306728	77306729	en	0.0456737	0.00451427	-3.98	0.00156	0	4:77130707-4:79093979
ENSG00000174514	NA	MFSD4A	Brain_Cerebellar_Hemisphere1	gtex	protein_coding	chr1	205567074	205567075	en	0.0799975	0.000149127	2.79	0.00156	0	1:204681068-1:205922403
ENSG00000274461	NA	AC023282.1	Brain_Cerebellar_Hemisphere1	gtex	lncRNA	chr10	122423681	122423682	en	0.585052	7.13e-35	2.17	0.00155	0	10:120591693-10:122407323
ENSG00000204301	NA	NOTCH4	Brain_Cerebellar_Hemisphere1	gtex	protein_coding	chr6	32398030	32398031	en	0.0993066	2.16e-05	-2.15	0.00152	0	6:31571337-6:32682664
ENSG00000168297	NA	PXK	Brain_Cerebellar_Hemisphere1	gtex	protein_coding	chr3	58342401	58342402	en	0.379788	1.1e-19	-2.13	0.00149	0	3:58157850-3:60272829
ENSG00000156219	NA	ART3	Brain_Cerebellar_Hemisphere1	gtex	protein_coding	chr4	77009356	77009357	en	0.255378	9.87e-13	-4.07	0.00143	0	4:77130707-4:79093979
ENSG00000184445	NA	KNTC1	Brain_Cerebellar_Hemisphere1	gtex	protein_coding	chr12	122973411	122973412	en	0.0570907	0.00145037	-3.02	0.00143	0	12:122009763-12:124976982
ENSG00000203805	NA	PLPP4	Brain_Cerebellar_Hemisphere1	gtex	protein_coding	chr10	122363523	122363524	en	0.589109	3.04e-35	2.11	0.00138	0	10:120591693-10:122407323
ENSG00000198169	NA	ZNF251	Brain_Cerebellar_Hemisphere1	gtex	protein_coding	chr8	145982632	145982633	en	0.276044	8.33e-14	2.1	0.00135	0	8:144236881-8:146303788
ENSG00000121988	NA	ZRANB3	Brain_Cerebellar_Hemisphere1	gtex	protein_coding	chr2	136289758	136289759	en	0.0339332	0.0146742	1.99	0.00135	0	2:135159453-2:137042794
ENSG00000103472	NA	RRN3P2	Brain_Cerebellar_Hemisphere1	gtex	lncRNA	chr16	29136668	29136669	en	0.176015	7.51e-09	1.75	0.00123	0	16:29036613-16:31382470
ENSG00000274682	NA	AC015540.1	Brain_Cerebellar_Hemisphere1	gtex	lncRNA	chr12	41365327	41365328	en	0.126426	1.37e-06	-2.04	0.00119	0	12:40816185-12:41658193
ENSG00000125459	NA	MSTO1	Brain_Cerebellar_Hemisphere1	gtex	protein_coding	chr1	155622598	155622599	en	0.248234	2.28e-12	0.77	0.00118	0	1:154770403-1:156336133
ENSG00000160803	NA	UBQLN4	Brain_Cerebellar_Hemisphere1	gtex	protein_coding	chr1	156014906	156014907	en	0.0659062	0.000604842	2.24	0.00112	0	1:154770403-1:156336133
ENSG00000278133	NA	AC135050.6	Brain_Cerebellar_Hemisphere1	gtex	lncRNA	chr16	31117647	31117648	en	0.18905	1.83e-09	3.9	0.00111	0	16:29036613-16:31382470
ENSG00000178226	NA	PRSS36	Brain_Cerebellar_Hemisphere1	gtex	protein_coding	chr16	31167618	31167619	en	0.276438	7.94e-14	-3.98	0.00105	0	16:29036613-16:31382470
ENSG00000177234	NA	LINC01561	Brain_Cerebellar_Hemisphere1	gtex	lncRNA	chr10	122362562	122362563	en	0.637388	5.89e-40	1.94	0.001	0	10:120591693-10:122407323
ENSG00000260060	NA	AC009088.1	Brain_Cerebellar_Hemisphere1	gtex	lncRNA	chr16	31224287	31224288	en	0.0246139	0.0381333	-2.74	0.000997	0	16:29036613-16:31382470
ENSG00000169955	NA	ZNF747	Brain_Cerebellar_Hemisphere1	gtex	protein_coding	chr16	30571145	30571146	en	0.0319241	0.0179933	1.81	0.000981	0	16:29036613-16:31382470
ENSG00000242686	NA	AC107464.1	Brain_Cerebellar_Hemisphere1	gtex	lncRNA	chr4	673412	673413	en	0.360942	1.51e-18	1.67	0.000928	0	4:695146-4:1478711
ENSG00000275389	NA	AC068790.9	Brain_Cerebellar_Hemisphere1	gtex	lncRNA	chr12	124558728	124558729	en	0.0725749	0.000311989	-1.44	0.000924	0	12:122009763-12:124976982
ENSG00000174529	NA	TMEM81	Brain_Cerebellar_Hemisphere1	gtex	protein_coding	chr1	205042737	205042738	en	0.175408	8.02e-09	1.87	0.000914	0	1:204681068-1:205922403
ENSG00000178882	NA	RFLNA	Brain_Cerebellar_Hemisphere1	gtex	protein_coding	chr12	124650219	124650220	en	0.0453155	0.00467852	-1.67	0.000911	0	12:122009763-12:124976982
ENSG00000185619	NA	PCGF3	Brain_Cerebellar_Hemisphere1	gtex	protein_coding	chr4	735220	735221	en	0.412175	1.03e-21	-2.07	0.000899	0	4:695146-4:1478711
ENSG00000136235	NA	GPNMB	Brain_Cerebellar_Hemisphere1	gtex	protein_coding	chr7	23331749	23331750	en	0.275414	8.99e-14	2.19	0.000873	0	7:22508611-7:23469560
ENSG00000163357	NA	DCST1	Brain_Cerebellar_Hemisphere1	gtex	protein_coding	chr1	155004333	155004334	en	0.170549	1.35e-08	-1.73	0.00087	0	1:154770403-1:156336133
ENSG00000215375	NA	MYL5	Brain_Cerebellar_Hemisphere1	gtex	protein_coding	chr4	669346	669347	en	0.168464	1.69e-08	2.35	0.000868	0	4:695146-4:1478711
ENSG00000151929	NA	BAG3	Brain_Cerebellar_Hemisphere1	gtex	protein_coding	chr10	121448786	121448787	en	0.0290148	0.0242152	-1.85	0.000839	0	10:120591693-10:122407323
ENSG00000182903	NA	ZNF721	Brain_Cerebellar_Hemisphere1	gtex	protein_coding	chr4	430874	430875	en	0.112684	5.59e-06	1.19	0.000791	0	4:695146-4:1478711
ENSG00000178209	NA	PLEC	Brain_Cerebellar_Hemisphere1	gtex	protein_coding	chr8	145019984	145019985	en	0.359702	1.79e-18	-1.81	0.00079	0	8:144236881-8:146303788
ENSG00000079616	NA	KIF22	Brain_Cerebellar_Hemisphere1	gtex	protein_coding	chr16	29825583	29825584	en	0.0272698	0.0289696	1.98	0.000772	0	16:29036613-16:31382470
ENSG00000118804	NA	STBD1	Brain_Cerebellar_Hemisphere1	gtex	protein_coding	chr4	77204279	77204280	en	0.165761	2.25e-08	-0.632	0.000772	0	4:77130707-4:79093979
ENSG00000164649	NA	CDCA7L	Brain_Cerebellar_Hemisphere1	gtex	protein_coding	chr7	21980778	21980779	en	0.11869	3.03e-06	-1.84	0.000765	0	7:22508611-7:23469560
ENSG00000227165	NA	WDR11-AS1	Brain_Cerebellar_Hemisphere1	gtex	lncRNA	chr10	122646659	122646660	en	0.339356	2.75e-17	1.79	0.000759	0	10:120591693-10:122407323
ENSG00000143622	NA	RIT1	Brain_Cerebellar_Hemisphere1	gtex	protein_coding	chr1	155907966	155907967	en	0.178337	5.85e-09	2.05	0.000731	0	1:154770403-1:156336133
ENSG00000163354	NA	DCST2	Brain_Cerebellar_Hemisphere1	gtex	protein_coding	chr1	154997768	154997769	en	0.387595	3.66e-20	-1.72	0.000728	0	1:154770403-1:156336133
ENSG00000204310	NA	AGPAT1	Brain_Cerebellar_Hemisphere1	gtex	protein_coding	chr6	32129365	32129366	en	0.080275	0.000145062	1.75	0.000704	0	6:31571337-6:32682664
ENSG00000234283	NA	LINC01731	Brain_Cerebellar_Hemisphere1	gtex	lncRNA	chr1	147767627	147767628	en	0.215695	9.54e-11	1.75	0.000702	0	1:144977648-1:148360712
ENSG00000167701	NA	GPT	Brain_Cerebellar_Hemisphere1	gtex	protein_coding	chr8	145732829	145732830	en	0.121082	2.38e-06	1.69	0.000686	0	8:144236881-8:146303788
ENSG00000274191	NA	AC026333.4	Brain_Cerebellar_Hemisphere1	gtex	lncRNA	chr12	123103848	123103849	en	0.042313	0.00631543	-2.2	0.000681	0	12:122009763-12:124976982
ENSG00000103496	NA	STX4	Brain_Cerebellar_Hemisphere1	gtex	protein_coding	chr16	31048700	31048701	en	0.0339033	0.0147187	-2.33	0.000674	0	16:29036613-16:31382470
ENSG00000158023	NA	WDR66	Brain_Cerebellar_Hemisphere1	gtex	protein_coding	chr12	122399267	122399268	en	0.171952	1.16e-08	-1.48	0.000666	0	12:122009763-12:124976982
ENSG00000162873	NA	KLHDC8A	Brain_Cerebellar_Hemisphere1	gtex	protein_coding	chr1	205319773	205319774	en	0.284072	3.13e-14	1.82	0.000661	0	1:204681068-1:205922403
ENSG00000111361	NA	EIF2B1	Brain_Cerebellar_Hemisphere1	gtex	protein_coding	chr12	123920613	123920614	en	0.0317008	0.0184068	0.944	0.000653	0	12:122009763-12:124976982
ENSG00000267121	NA	AC008105.3	Brain_Cerebellar_Hemisphere1	gtex	lncRNA	chr17	43693883	43693884	en	0.0979421	2.48e-05	8.54	0.000637	0	17:43056905-17:45876022
ENSG00000174938	NA	SEZ6L2	Brain_Cerebellar_Hemisphere1	gtex	protein_coding	chr16	29888330	29888331	en	0.12657	1.35e-06	-1.03	0.000634	0	16:29036613-16:31382470
ENSG00000130779	NA	CLIP1	Brain_Cerebellar_Hemisphere1	gtex	protein_coding	chr12	122858250	122858251	en	0.0321041	0.017667	-2.15	0.000632	0	12:122009763-12:124976982
ENSG00000141279	NA	NPEPPS	Brain_Cerebellar_Hemisphere1	gtex	protein_coding	chr17	45641233	45641234	en	0.088596	6.32e-05	0.321	0.00063	0	17:43056905-17:45876022
ENSG00000120008	NA	WDR11	Brain_Cerebellar_Hemisphere1	gtex	protein_coding	chr10	122451970	122451971	en	0.466954	2.04e-25	1.66	0.000607	0	10:120591693-10:122407323
ENSG00000247735	NA	AC120114.1	Brain_Cerebellar_Hemisphere1	gtex	lncRNA	chr16	29947206	29947207	en	0.030216	0.021415	-1.21	0.0006	0	16:29036613-16:31382470
ENSG00000167397	NA	VKORC1	Brain_Cerebellar_Hemisphere1	gtex	protein_coding	chr16	31092680	31092681	en	0.0482927	0.00347712	3.71	0.000596	0	16:29036613-16:31382470
ENSG00000164181	NA	ELOVL7	Brain_Cerebellar_Hemisphere1	gtex	protein_coding	chr5	60112311	60112312	en	0.162137	3.31e-08	1.61	0.000592	0	5:58524622-5:60935451
ENSG00000103549	NA	RNF40	Brain_Cerebellar_Hemisphere1	gtex	protein_coding	chr16	30811011	30811012	en	0.141054	3.03e-07	-2.17	0.000588	0	16:29036613-16:31382470
ENSG00000160957	NA	RECQL4	Brain_Cerebellar_Hemisphere1	gtex	protein_coding	chr8	145621907	145621908	en	0.155986	6.35e-08	-1.62	0.000572	0	8:144236881-8:146303788
ENSG00000143603	NA	KCNN3	Brain_Cerebellar_Hemisphere1	gtex	protein_coding	chr1	154878681	154878682	en	0.085438	8.67e-05	-1.56	0.000553	0	1:154770403-1:156336133
ENSG00000197165	NA	SULT1A2	Brain_Cerebellar_Hemisphere1	gtex	protein_coding	chr16	28590346	28590347	en	0.161897	3.4e-08	1.14	0.000549	0	16:29036613-16:31382470
ENSG00000184144	NA	CNTN2	Brain_Cerebellar_Hemisphere1	gtex	protein_coding	chr1	205019148	205019149	en	0.316616	5.31e-16	1.78	0.000544	0	1:204681068-1:205922403
ENSG00000228789	NA	HCG22	Brain_Cerebellar_Hemisphere1	gtex	lncRNA	chr6	31374762	31374763	en	0.0616865	0.000919267	1.59	0.000544	0	6:31571337-6:32682664
ENSG00000089094	NA	KDM2B	Brain_Cerebellar_Hemisphere1	gtex	protein_coding	chr12	122021200	122021201	en	0.076357	0.000214234	2.32	0.000528	0	12:122009763-12:124976982
ENSG00000178722	NA	C5orf64	Brain_Cerebellar_Hemisphere1	gtex	lncRNA	chr5	61007868	61007869	en	0.181503	4.15e-09	1.56	0.000519	0	5:58524622-5:60935451
ENSG00000232300	NA	FAM215B	Brain_Cerebellar_Hemisphere1	gtex	lncRNA	chr17	44284020	44284021	en	0.358604	2.08e-18	-3.79	0.000516	0	17:43056905-17:45876022
ENSG00000270361	NA	AL451085.1	Brain_Cerebellar_Hemisphere1	gtex	lncRNA	chr1	154873987	154873988	en	0.0561486	0.00159254	-1.44	0.000508	0	1:154770403-1:156336133
ENSG00000188735	NA	TMEM120B	Brain_Cerebellar_Hemisphere1	gtex	protein_coding	chr12	122100245	122100246	en	0.104372	1.3e-05	1.53	0.000502	0	12:122009763-12:124976982
ENSG00000169231	NA	THBS3	Brain_Cerebellar_Hemisphere1	gtex	protein_coding	chr1	155182308	155182309	en	0.319793	3.53e-16	-1.82	0.000495	0	1:154770403-1:156336133
ENSG00000102882	NA	MAPK3	Brain_Cerebellar_Hemisphere1	gtex	protein_coding	chr16	30155307	30155308	en	0.0750128	0.000244868	-0.788	0.000493	0	16:29036613-16:31382470
ENSG00000176723	NA	ZNF843	Brain_Cerebellar_Hemisphere1	gtex	protein_coding	chr16	31428606	31428607	en	0.332341	6.93e-17	-1.11	0.000491	0	16:29036613-16:31382470
ENSG00000130787	NA	HIP1R	Brain_Cerebellar_Hemisphere1	gtex	protein_coding	chr12	123338599	123338600	en	0.129327	1.02e-06	-3.75	0.000477	0	12:122009763-12:124976982
ENSG00000273133	NA	AC116651.1	Brain_Cerebellar_Hemisphere1	gtex	lncRNA	chr4	15573177	15573178	en	0.282024	4.02e-14	-1.62	0.000472	0	4:15147446-4:15926136
ENSG00000280789	NA	PAGR1	Brain_Cerebellar_Hemisphere1	gtex	protein_coding	chr16	29883889	29883890	en	0.0370266	0.0107365	-0.537	0.000468	0	16:29036613-16:31382470
ENSG00000204290	NA	BTNL2	Brain_Cerebellar_Hemisphere1	gtex	protein_coding	chr6	31923829	31923830	en	0.0630475	0.000803173	1.48	0.000464	0	6:31571337-6:32682664
ENSG00000111364	NA	DDX55	Brain_Cerebellar_Hemisphere1	gtex	protein_coding	chr12	124096211	124096212	en	0.417008	5e-22	-0.439	0.000449	0	12:122009763-12:124976982
ENSG00000165669	NA	FAM204A	Brain_Cerebellar_Hemisphere1	gtex	protein_coding	chr10	119993665	119993666	en	0.0465049	0.00415512	1.47	0.000449	0	10:120591693-10:122407323
ENSG00000158113	NA	LRRC43	Brain_Cerebellar_Hemisphere1	gtex	protein_coding	chr12	122652223	122652224	en	0.129931	9.58e-07	0.874	0.000448	0	12:122009763-12:124976982
ENSG00000166582	NA	CENPV	Brain_Cerebellar_Hemisphere1	gtex	protein_coding	chr17	16254311	16254312	en	0.29599	7.19e-15	-0.00858	0.000444	0	17:15020965-17:16411522
ENSG00000276728	NA	AC142472.1	Brain_Cerebellar_Hemisphere1	gtex	lncRNA	chr17	43240052	43240053	en	0.054373	0.00189957	-1.92	0.000433	0	17:43056905-17:45876022
ENSG00000213676	NA	ATF6B	Brain_Cerebellar_Hemisphere1	gtex	protein_coding	chr6	32029963	32029964	en	0.0322113	0.0174756	-1.42	0.000427	0	6:31571337-6:32682664
ENSG00000109099	NA	PMP22	Brain_Cerebellar_Hemisphere1	gtex	protein_coding	chr17	15019560	15019561	en	0.0327622	0.0165244	0.425	0.000426	0	17:15020965-17:16411522
ENSG00000197653	NA	DNAH10	Brain_Cerebellar_Hemisphere1	gtex	protein_coding	chr12	124366881	124366882	en	0.115645	4.14e-06	1.58	0.000422	0	12:122009763-12:124976982
ENSG00000133069	NA	TMCC2	Brain_Cerebellar_Hemisphere1	gtex	protein_coding	chr1	205238783	205238784	en	0.110736	6.81e-06	1.2	0.000422	0	1:204681068-1:205922403
ENSG00000152253	NA	SPC25	Brain_Cerebellar_Hemisphere1	gtex	protein_coding	chr2	169723478	169723479	en	0.0296274	0.0227431	1.42	0.000421	0	2:167356254-2:169968112
ENSG00000167371	NA	PRRT2	Brain_Cerebellar_Hemisphere1	gtex	protein_coding	chr16	29787617	29787618	en	0.133993	6.3e-07	-0.824	0.000419	0	16:29036613-16:31382470
ENSG00000160753	NA	RUSC1	Brain_Cerebellar_Hemisphere1	gtex	protein_coding	chr1	155298447	155298448	en	0.0373421	0.0104006	0.262	0.000411	0	1:154770403-1:156336133
ENSG00000185499	NA	MUC1	Brain_Cerebellar_Hemisphere1	gtex	protein_coding	chr1	155151446	155151447	en	0.160471	3.95e-08	1.66	0.00041	0	1:154770403-1:156336133
ENSG00000139714	NA	MORN3	Brain_Cerebellar_Hemisphere1	gtex	protein_coding	chr12	122079037	122079038	en	0.259771	5.87e-13	1.26	0.000403	0	12:122009763-12:124976982
ENSG00000183715	NA	OPCML	Brain_Cerebellar_Hemisphere1	gtex	protein_coding	chr11	132903058	132903059	en	0.133798	6.43e-07	-1.1	0.000399	0	11:133000260-11:134205993
ENSG00000141295	NA	SCRN2	Brain_Cerebellar_Hemisphere1	gtex	protein_coding	chr17	45889372	45889373	en	0.446154	5.72e-24	0.369	0.000395	0	17:43056905-17:45876022
ENSG00000231852	NA	CYP21A2	Brain_Cerebellar_Hemisphere1	gtex	protein_coding	chr6	32010805	32010806	en	0.322428	2.52e-16	-1.37	0.000394	0	6:31571337-6:32682664
ENSG00000172992	NA	DCAKD	Brain_Cerebellar_Hemisphere1	gtex	protein_coding	chr17	43122346	43122347	en	0.379312	1.18e-19	-2.26	0.000393	0	17:43056905-17:45876022
ENSG00000130997	NA	POLN	Brain_Cerebellar_Hemisphere1	gtex	protein_coding	chr4	2231633	2231634	en	0.0492621	0.00315723	-1.31	0.000392	0	4:695146-4:1478711
ENSG00000213654	NA	GPSM3	Brain_Cerebellar_Hemisphere1	gtex	protein_coding	chr6	32192167	32192168	en	0.0445803	0.00503477	1.36	0.000387	0	6:31571337-6:32682664
ENSG00000099365	NA	STX1B	Brain_Cerebellar_Hemisphere1	gtex	protein_coding	chr16	31023860	31023861	en	0.097393	2.62e-05	-0.97	0.000381	0	16:29036613-16:31382470
ENSG00000204463	NA	BAG6	Brain_Cerebellar_Hemisphere1	gtex	protein_coding	chr6	31610531	31610532	en	0.36165	1.37e-18	-1.34	0.000379	0	6:31571337-6:32682664
ENSG00000132676	NA	DAP3	Brain_Cerebellar_Hemisphere1	gtex	protein_coding	chr1	155621870	155621871	en	0.0580466	0.0013191	-0.0589	0.000374	0	1:154770403-1:156336133
ENSG00000179344	NA	HLA-DQB1	Brain_Cerebellar_Hemisphere1	gtex	protein_coding	chr6	32630913	32630914	en	0.516447	4.25e-29	-1.31	0.000373	0	6:31571337-6:32682664
ENSG00000278811	NA	LINC00624	Brain_Cerebellar_Hemisphere1	gtex	lncRNA	chr1	146785780	146785781	en	0.444191	7.79e-24	1.33	0.000371	0	1:144977648-1:148360712
ENSG00000169592	NA	INO80E	Brain_Cerebellar_Hemisphere1	gtex	protein_coding	chr16	30006630	30006631	en	0.317615	4.67e-16	-0.417	0.00036	0	16:29036613-16:31382470
ENSG00000276790	NA	AC068234.3	Brain_Cerebellar_Hemisphere1	gtex	lncRNA	chr17	45399929	45399930	en	0.0247391	0.0376402	1.17	0.000356	0	17:43056905-17:45876022
ENSG00000272849	NA	AC084018.1	Brain_Cerebellar_Hemisphere1	gtex	lncRNA	chr12	122260285	122260286	en	0.190543	1.55e-09	-1.26	0.000356	0	12:122009763-12:124976982
ENSG00000197363	NA	ZNF517	Brain_Cerebellar_Hemisphere1	gtex	protein_coding	chr8	146040564	146040565	en	0.2915	1.25e-14	-1.28	0.000353	0	8:144236881-8:146303788
ENSG00000275413	NA	AC002553.2	Brain_Cerebellar_Hemisphere1	gtex	lncRNA	chr17	15913120	15913121	en	0.0230163	0.0450504	-0.565	0.000344	0	17:15020965-17:16411522
ENSG00000139725	NA	RHOF	Brain_Cerebellar_Hemisphere1	gtex	protein_coding	chr12	122260285	122260286	en	0.0977906	2.52e-05	-1.22	0.000337	0	12:122009763-12:124976982
ENSG00000138759	NA	FRAS1	Brain_Cerebellar_Hemisphere1	gtex	protein_coding	chr4	78983441	78983442	en	0.034289	0.0141549	-0.663	0.000336	0	4:77130707-4:79093979
ENSG00000196126	NA	HLA-DRB1	Brain_Cerebellar_Hemisphere1	gtex	protein_coding	chr6	32563863	32563864	en	0.332344	6.93e-17	1.22	0.000334	0	6:31571337-6:32682664
ENSG00000265519	NA	AC015922.2	Brain_Cerebellar_Hemisphere1	gtex	lncRNA	chr17	15660363	15660364	en	0.0751752	0.000240947	-1.05	0.000332	0	17:15020965-17:16411522
ENSG00000255182	NA	AC084125.2	Brain_Cerebellar_Hemisphere1	gtex	lncRNA	chr8	145732829	145732830	en	0.342089	1.91e-17	1.17	0.000332	0	8:144236881-8:146303788
ENSG00000162836	NA	ACP6	Brain_Cerebellar_Hemisphere1	gtex	protein_coding	chr1	147124351	147124352	en	0.268306	2.12e-13	1.24	0.000332	0	1:144977648-1:148360712
ENSG00000038945	NA	MSR1	Brain_Cerebellar_Hemisphere1	gtex	protein_coding	chr8	16268562	16268563	en	0.0939472	3.7e-05	-1.24	0.000332	0	8:15991660-8:17387624
ENSG00000254648	NA	AP000911.1	Brain_Cerebellar_Hemisphere1	gtex	lncRNA	chr11	133869739	133869740	en	0.0383008	0.00944425	-0.689	0.000322	0	11:133000260-11:134205993
ENSG00000156885	NA	COX6A2	Brain_Cerebellar_Hemisphere1	gtex	protein_coding	chr16	31030420	31030421	en	0.0641698	0.000718549	-1.91	0.000322	0	16:29036613-16:31382470
ENSG00000168306	NA	ACOX2	Brain_Cerebellar_Hemisphere1	gtex	protein_coding	chr3	58536500	58536501	en	0.061557	0.000931156	-1.21	0.00032	0	3:58157850-3:60272829
ENSG00000243649	NA	CFB	Brain_Cerebellar_Hemisphere1	gtex	protein_coding	chr6	31893646	31893647	en	0.0531607	0.00214265	1.19	0.000316	0	6:31571337-6:32682664
ENSG00000177238	NA	TRIM72	Brain_Cerebellar_Hemisphere1	gtex	protein_coding	chr16	31223334	31223335	en	0.1995	5.8e-10	1.28	0.000314	0	16:29036613-16:31382470
ENSG00000181135	NA	ZNF707	Brain_Cerebellar_Hemisphere1	gtex	protein_coding	chr8	144761792	144761793	en	0.0537634	0.00201813	-1.18	0.000312	0	8:144236881-8:146303788
ENSG00000260304	NA	AC009088.2	Brain_Cerebellar_Hemisphere1	gtex	lncRNA	chr16	31189314	31189315	en	0.223089	4.14e-11	0.848	0.000311	0	16:29036613-16:31382470
ENSG00000212694	NA	LINC01089	Brain_Cerebellar_Hemisphere1	gtex	lncRNA	chr12	122276664	122276665	en	0.143361	2.38e-07	-1.13	0.000311	0	12:122009763-12:124976982
ENSG00000198064	NA	NPIPB13	Brain_Cerebellar_Hemisphere1	gtex	protein_coding	chr16	30249922	30249923	en	0.022414	0.0479869	-0.941	0.000308	0	16:29036613-16:31382470
ENSG00000225914	NA	TSBP1-AS1	Brain_Cerebellar_Hemisphere1	gtex	lncRNA	chr6	32301442	32301443	en	0.199671	5.69e-10	1.17	0.000307	0	6:31571337-6:32682664
ENSG00000281406	NA	BLACAT1	Brain_Cerebellar_Hemisphere1	gtex	protein_coding	chr1	205407947	205407948	en	0.122741	2.01e-06	-0.902	0.000298	0	1:204681068-1:205922403
ENSG00000161016	NA	RPL8	Brain_Cerebellar_Hemisphere1	gtex	protein_coding	chr8	146001731	146001732	en	0.456065	1.19e-24	-1.14	0.000298	0	8:144236881-8:146303788
ENSG00000005844	NA	ITGAL	Brain_Cerebellar_Hemisphere1	gtex	protein_coding	chr16	30510806	30510807	en	0.0438432	0.00541942	0.241	0.000294	0	16:29036613-16:31382470
ENSG00000149922	NA	TBX6	Brain_Cerebellar_Hemisphere1	gtex	protein_coding	chr16	30114959	30114960	en	0.19556	8.96e-10	1.19	0.000293	0	16:29036613-16:31382470
ENSG00000127418	NA	FGFRL1	Brain_Cerebellar_Hemisphere1	gtex	protein_coding	chr4	1244935	1244936	en	0.037704	0.0100286	0.813	0.000291	0	4:695146-4:1478711
ENSG00000277494	NA	GPIHBP1	Brain_Cerebellar_Hemisphere1	gtex	protein_coding	chr8	144277717	144277718	en	0.179932	4.92e-09	1.11	0.000291	0	8:144236881-8:146303788
ENSG00000188487	NA	INSC	Brain_Cerebellar_Hemisphere1	gtex	protein_coding	chr11	15127195	15127196	en	0.0724152	0.000316979	1.13	0.000291	0	11:13373433-11:15742397
ENSG00000138398	NA	PPIG	Brain_Cerebellar_Hemisphere1	gtex	protein_coding	chr2	170439867	170439868	en	0.0648532	0.00067145	-1.13	0.000291	0	2:167356254-2:169968112
ENSG00000147789	NA	ZNF7	Brain_Cerebellar_Hemisphere1	gtex	protein_coding	chr8	146053889	146053890	en	0.0646063	0.0006881	-1.11	0.000289	0	8:144236881-8:146303788
ENSG00000240053	NA	LY6G5B	Brain_Cerebellar_Hemisphere1	gtex	protein_coding	chr6	31641699	31641700	en	0.343326	1.62e-17	1.1	0.000287	0	6:31571337-6:32682664
ENSG00000169900	NA	PYDC1	Brain_Cerebellar_Hemisphere1	gtex	protein_coding	chr16	31158335	31158336	en	0.0754124	0.000235331	-1.7	0.000283	0	16:29036613-16:31382470
ENSG00000103502	NA	CDIPT	Brain_Cerebellar_Hemisphere1	gtex	protein_coding	chr16	29874616	29874617	en	0.258551	6.78e-13	-0.0172	0.00028	0	16:29036613-16:31382470
ENSG00000166105	NA	GLB1L3	Brain_Cerebellar_Hemisphere1	gtex	protein_coding	chr11	134184355	134184356	en	0.297222	6.16e-15	0.483	0.000279	0	11:133000260-11:134205993
ENSG00000117222	NA	RBBP5	Brain_Cerebellar_Hemisphere1	gtex	protein_coding	chr1	205056425	205056426	en	0.0935294	3.86e-05	0.782	0.000279	0	1:204681068-1:205922403
ENSG00000225855	NA	RUSC1-AS1	Brain_Cerebellar_Hemisphere1	gtex	lncRNA	chr1	155284855	155284856	en	0.133722	6.48e-07	-0.816	0.000279	0	1:154770403-1:156336133
ENSG00000159314	NA	ARHGAP27	Brain_Cerebellar_Hemisphere1	gtex	protein_coding	chr17	43476324	43476325	en	0.222039	4.66e-11	-6.35	0.000278	0	17:43056905-17:45876022
ENSG00000261587	NA	TMEM249	Brain_Cerebellar_Hemisphere1	gtex	protein_coding	chr8	145576085	145576086	en	0.229522	1.99e-11	-1.06	0.000278	0	8:144236881-8:146303788
ENSG00000102886	NA	GDPD3	Brain_Cerebellar_Hemisphere1	gtex	protein_coding	chr16	30123555	30123556	en	0.306519	1.92e-15	-0.985	0.000276	0	16:29036613-16:31382470
ENSG00000198400	NA	NTRK1	Brain_Cerebellar_Hemisphere1	gtex	protein_coding	chr1	156960411	156960412	en	0.0808075	0.000137568	-0.88	0.000276	0	1:154770403-1:156336133
ENSG00000138750	NA	NUP54	Brain_Cerebellar_Hemisphere1	gtex	protein_coding	chr4	77074567	77074568	en	0.119801	2.71e-06	-1.2	0.000273	0	4:77130707-4:79093979
ENSG00000204241	NA	LINC02731	Brain_Cerebellar_Hemisphere1	gtex	lncRNA	chr11	133909537	133909538	en	0.145994	1.81e-07	0.428	0.000272	0	11:133000260-11:134205993
ENSG00000204528	NA	PSORS1C3	Brain_Cerebellar_Hemisphere1	gtex	lncRNA	chr6	31215222	31215223	en	0.383187	6.84e-20	-1.05	0.000272	0	6:31571337-6:32682664
ENSG00000160781	NA	PAQR6	Brain_Cerebellar_Hemisphere1	gtex	protein_coding	chr1	156241756	156241757	en	0.0571577	0.00144076	0.665	0.000271	0	1:154770403-1:156336133
ENSG00000244731	NA	C4A	Brain_Cerebellar_Hemisphere1	gtex	protein_coding	chr6	31946761	31946762	en	0.398736	7.37e-21	-1.04	0.000268	0	6:31571337-6:32682664
ENSG00000133059	NA	DSTYK	Brain_Cerebellar_Hemisphere1	gtex	protein_coding	chr1	205164084	205164085	en	0.0416511	0.00674804	-0.831	0.000268	0	1:204681068-1:205922403
ENSG00000276855	NA	AC015922.3	Brain_Cerebellar_Hemisphere1	gtex	lncRNA	chr17	15705178	15705179	en	0.165454	2.33e-08	-1.1	0.000264	0	17:15020965-17:16411522
ENSG00000176953	NA	NFATC2IP	Brain_Cerebellar_Hemisphere1	gtex	protein_coding	chr16	28958300	28958301	en	0.0345679	0.013761	0.632	0.000264	0	16:29036613-16:31382470
ENSG00000275371	NA	AC012645.4	Brain_Cerebellar_Hemisphere1	gtex	lncRNA	chr16	30117774	30117775	en	0.265365	3.01e-13	-0.748	0.000263	0	16:29036613-16:31382470
ENSG00000261346	NA	AC116348.3	Brain_Cerebellar_Hemisphere1	gtex	lncRNA	chr16	30499139	30499140	en	0.265247	3.06e-13	-1.1	0.000261	0	16:29036613-16:31382470
ENSG00000232093	NA	DCST1-AS1	Brain_Cerebellar_Hemisphere1	gtex	lncRNA	chr1	155012376	155012377	en	0.0671473	0.000534762	-0.768	0.000261	0	1:154770403-1:156336133
ENSG00000226235	NA	LEMD1-AS1	Brain_Cerebellar_Hemisphere1	gtex	lncRNA	chr1	205348785	205348786	en	0.0535515	0.00206106	-0.828	0.000261	0	1:204681068-1:205922403
ENSG00000187607	NA	ZNF286A	Brain_Cerebellar_Hemisphere1	gtex	protein_coding	chr17	15617917	15617918	en	0.277775	6.75e-14	-0.856	0.00026	0	17:15020965-17:16411522
ENSG00000090238	NA	YPEL3	Brain_Cerebellar_Hemisphere1	gtex	protein_coding	chr16	30078438	30078439	en	0.357773	2.32e-18	-1.09	0.000258	0	16:29036613-16:31382470
ENSG00000122591	NA	FAM126A	Brain_Cerebellar_Hemisphere1	gtex	protein_coding	chr7	22989446	22989447	en	0.136463	4.88e-07	-1.07	0.000257	0	7:22508611-7:23469560
ENSG00000272182	NA	AC135507.1	Brain_Cerebellar_Hemisphere1	gtex	lncRNA	chr3	58394395	58394396	en	0.0576208	0.00137603	-0.982	0.000256	0	3:58157850-3:60272829
ENSG00000175106	NA	TVP23C	Brain_Cerebellar_Hemisphere1	gtex	protein_coding	chr17	15406056	15406057	en	0.165329	2.36e-08	-0.682	0.000256	0	17:15020965-17:16411522
ENSG00000014164	NA	ZC3H3	Brain_Cerebellar_Hemisphere1	gtex	protein_coding	chr8	144594838	144594839	en	0.156004	6.33e-08	-0.989	0.000256	0	8:144236881-8:146303788
ENSG00000150967	NA	ABCB9	Brain_Cerebellar_Hemisphere1	gtex	protein_coding	chr12	123440340	123440341	en	0.130377	9.15e-07	-1.98	0.000255	0	12:122009763-12:124976982
ENSG00000274292	NA	AC084018.2	Brain_Cerebellar_Hemisphere1	gtex	lncRNA	chr12	122223214	122223215	en	0.257926	7.3e-13	-0.872	0.000255	0	12:122009763-12:124976982
ENSG00000132677	NA	RHBG	Brain_Cerebellar_Hemisphere1	gtex	protein_coding	chr1	156290276	156290277	en	0.0350608	0.013092	0.396	0.000253	0	1:154770403-1:156336133
ENSG00000181625	NA	SLX1B	Brain_Cerebellar_Hemisphere1	gtex	protein_coding	chr16	29821995	29821996	en	0.16291	3.05e-08	0.0934	0.000252	0	16:29036613-16:31382470
ENSG00000118816	NA	CCNI	Brain_Cerebellar_Hemisphere1	gtex	protein_coding	chr4	78001996	78001997	en	0.0761176	0.000219395	0.898	0.000251	0	4:77130707-4:79093979
ENSG00000261678	NA	SCRT1	Brain_Cerebellar_Hemisphere1	gtex	protein_coding	chr8	145609805	145609806	en	0.101424	1.75e-05	0.953	0.000251	0	8:144236881-8:146303788
ENSG00000149328	NA	GLB1L2	Brain_Cerebellar_Hemisphere1	gtex	protein_coding	chr11	134219109	134219110	en	0.0288658	0.0245879	0.748	0.00025	0	11:133000260-11:134205993
ENSG00000138764	NA	CCNG2	Brain_Cerebellar_Hemisphere1	gtex	protein_coding	chr4	78086943	78086944	en	0.168195	1.74e-08	0.396	0.000249	0	4:77130707-4:79093979
ENSG00000156234	NA	CXCL13	Brain_Cerebellar_Hemisphere1	gtex	protein_coding	chr4	78078308	78078309	en	0.067368	0.000523177	0.352	0.000249	0	4:77130707-4:79093979
ENSG00000204348	NA	DXO	Brain_Cerebellar_Hemisphere1	gtex	protein_coding	chr6	32048476	32048477	en	0.131489	8.16e-07	0.961	0.000248	0	6:31571337-6:32682664
ENSG00000243364	NA	EFNA4	Brain_Cerebellar_Hemisphere1	gtex	protein_coding	chr1	155020325	155020326	en	0.094841	3.38e-05	-0.632	0.000248	0	1:154770403-1:156336133
ENSG00000197771	NA	MCMBP	Brain_Cerebellar_Hemisphere1	gtex	protein_coding	chr10	121679347	121679348	en	0.0499993	0.00293393	-0.952	0.000248	0	10:120591693-10:122407323
ENSG00000260517	NA	AC009093.2	Brain_Cerebellar_Hemisphere1	gtex	lncRNA	chr16	29154153	29154154	en	0.0770635	0.000199698	0.352	0.000247	0	16:29036613-16:31382470
ENSG00000140691	NA	ARMC5	Brain_Cerebellar_Hemisphere1	gtex	protein_coding	chr16	31437713	31437714	en	0.0634836	0.000769163	-1.32	0.000246	0	16:29036613-16:31382470
ENSG00000196735	NA	HLA-DQA1	Brain_Cerebellar_Hemisphere1	gtex	protein_coding	chr6	32571220	32571221	en	0.160208	4.06e-08	-0.943	0.000245	0	6:31571337-6:32682664
ENSG00000187688	NA	TRPV2	Brain_Cerebellar_Hemisphere1	gtex	protein_coding	chr17	16346526	16346527	en	0.232588	1.4e-11	-1.28	0.000244	0	17:15020965-17:16411522
ENSG00000177548	NA	RABEP2	Brain_Cerebellar_Hemisphere1	gtex	protein_coding	chr16	28936688	28936689	en	0.0413787	0.00693465	-0.415	0.000243	0	16:29036613-16:31382470
ENSG00000114796	NA	KLHL24	Brain_Cerebellar_Hemisphere1	gtex	protein_coding	chr3	183350114	183350115	en	0.023171	0.0443269	-1.22	0.000242	0	3:181511166-3:183769683
ENSG00000261332	NA	AC116348.2	Brain_Cerebellar_Hemisphere1	gtex	lncRNA	chr16	30535131	30535132	en	0.17843	5.79e-09	0.756	0.000241	0	16:29036613-16:31382470
ENSG00000224389	NA	C4B	Brain_Cerebellar_Hemisphere1	gtex	protein_coding	chr6	31990785	31990786	en	0.200134	5.41e-10	0.933	0.000241	0	6:31571337-6:32682664
ENSG00000163468	NA	CCT3	Brain_Cerebellar_Hemisphere1	gtex	protein_coding	chr1	156298258	156298259	en	0.323126	2.3e-16	-0.653	0.000241	0	1:154770403-1:156336133
ENSG00000226816	NA	AC005082.1	Brain_Cerebellar_Hemisphere1	gtex	lncRNA	chr7	23214073	23214074	en	0.10361	1.4e-05	0.475	0.00024	0	7:22508611-7:23469560
ENSG00000196189	NA	SEMA4A	Brain_Cerebellar_Hemisphere1	gtex	protein_coding	chr1	156172311	156172312	en	0.194273	1.03e-09	-0.801	0.00024	0	1:154770403-1:156336133
ENSG00000175868	NA	CALCB	Brain_Cerebellar_Hemisphere1	gtex	protein_coding	chr11	15051609	15051610	en	0.209396	1.93e-10	0.934	0.000239	0	11:13373433-11:15742397
ENSG00000197858	NA	GPAA1	Brain_Cerebellar_Hemisphere1	gtex	protein_coding	chr8	145113764	145113765	en	0.0557955	0.00164935	-0.913	0.000239	0	8:144236881-8:146303788
ENSG00000160959	NA	LRRC14	Brain_Cerebellar_Hemisphere1	gtex	protein_coding	chr8	145969861	145969862	en	0.030467	0.0208733	-0.915	0.000239	0	8:144236881-8:146303788
ENSG00000138758	NA	SEPTIN11	Brain_Cerebellar_Hemisphere1	gtex	protein_coding	chr4	77920274	77920275	en	0.168338	1.71e-08	0.402	0.000239	0	4:77130707-4:79093979
ENSG00000138771	NA	SHROOM3	Brain_Cerebellar_Hemisphere1	gtex	protein_coding	chr4	77611674	77611675	en	0.485056	1.01e-26	0.784	0.000239	0	4:77130707-4:79093979
ENSG00000160948	NA	VPS28	Brain_Cerebellar_Hemisphere1	gtex	protein_coding	chr8	145448855	145448856	en	0.32236	2.54e-16	-0.913	0.000239	0	8:144236881-8:146303788
ENSG00000125409	NA	TEKT3	Brain_Cerebellar_Hemisphere1	gtex	protein_coding	chr17	15188419	15188420	en	0.410625	1.29e-21	-0.22	0.000238	0	17:15020965-17:16411522
ENSG00000139719	NA	VPS33A	Brain_Cerebellar_Hemisphere1	gtex	protein_coding	chr12	123016204	123016205	en	0.24139	5.07e-12	-1.01	0.000238	0	12:122009763-12:124976982
ENSG00000159111	NA	MRPL10	Brain_Cerebellar_Hemisphere1	gtex	protein_coding	chr17	45894180	45894181	en	0.532024	2.46e-30	1.37	0.000237	0	17:43056905-17:45876022
ENSG00000174939	NA	ASPHD1	Brain_Cerebellar_Hemisphere1	gtex	protein_coding	chr16	29903243	29903244	en	0.0751351	0.000241909	0.331	0.000236	0	16:29036613-16:31382470
ENSG00000239704	NA	CDRT4	Brain_Cerebellar_Hemisphere1	gtex	protein_coding	chr17	15376474	15376475	en	0.368784	5.13e-19	-0.358	0.000236	0	17:15020965-17:16411522
ENSG00000214946	NA	TBC1D26	Brain_Cerebellar_Hemisphere1	gtex	protein_coding	chr17	15651956	15651957	en	0.280267	4.99e-14	-0.257	0.000236	0	17:15020965-17:16411522
ENSG00000237541	NA	HLA-DQA2	Brain_Cerebellar_Hemisphere1	gtex	protein_coding	chr6	32668235	32668236	en	0.450891	2.71e-24	-0.895	0.000235	0	6:31571337-6:32682664
ENSG00000170619	NA	COMMD5	Brain_Cerebellar_Hemisphere1	gtex	protein_coding	chr8	146072653	146072654	en	0.0981308	2.43e-05	-0.898	0.000234	0	8:144236881-8:146303788
ENSG00000241322	NA	CDRT1	Brain_Cerebellar_Hemisphere1	gtex	protein_coding	chr17	15483131	15483132	en	0.0413161	0.00697829	0.254	0.000233	0	17:15020965-17:16411522
ENSG00000232629	NA	HLA-DQB2	Brain_Cerebellar_Hemisphere1	gtex	protein_coding	chr6	32631897	32631898	en	0.25355	1.22e-12	0.887	0.000233	0	6:31571337-6:32682664
ENSG00000111325	NA	OGFOD2	Brain_Cerebellar_Hemisphere1	gtex	protein_coding	chr12	123672987	123672988	en	0.0337465	0.0149544	-1.81	0.000233	0	12:122009763-12:124976982
ENSG00000183955	NA	KMT5A	Brain_Cerebellar_Hemisphere1	gtex	protein_coding	chr12	123838812	123838813	en	0.0848507	9.19e-05	1.76	0.000231	0	12:122009763-12:124976982
ENSG00000179918	NA	SEPHS2	Brain_Cerebellar_Hemisphere1	gtex	protein_coding	chr16	30462257	30462258	en	0.101468	1.74e-05	0.428	0.000231	0	16:29036613-16:31382470
ENSG00000152217	NA	SETBP1	Brain_Cerebellar_Hemisphere1	gtex	protein_coding	chr18	42573582	42573583	en	0.0774431	0.000192297	-0.896	0.000231	0	18:39892648-18:42921854
ENSG00000149930	NA	TAOK2	Brain_Cerebellar_Hemisphere1	gtex	protein_coding	chr16	29991664	29991665	en	0.0394525	0.00841225	-0.421	0.00023	0	16:29036613-16:31382470
ENSG00000260487	NA	AC116348.1	Brain_Cerebellar_Hemisphere1	gtex	lncRNA	chr16	30525532	30525533	en	0.210351	1.74e-10	0.412	0.000229	0	16:29036613-16:31382470
ENSG00000163145	NA	C1QTNF7	Brain_Cerebellar_Hemisphere1	gtex	protein_coding	chr4	15459269	15459270	en	0.0414407	0.00689174	1.05	0.000229	0	4:15147446-4:15926136
ENSG00000151498	NA	ACAD8	Brain_Cerebellar_Hemisphere1	gtex	protein_coding	chr11	134134346	134134347	en	0.0490788	0.00321537	-0.271	0.000228	0	11:133000260-11:134205993
ENSG00000117266	NA	CDK18	Brain_Cerebellar_Hemisphere1	gtex	protein_coding	chr1	205490583	205490584	en	0.027641	0.0278834	0.908	0.000227	0	1:204681068-1:205922403
ENSG00000180834	NA	MAP6D1	Brain_Cerebellar_Hemisphere1	gtex	protein_coding	chr3	183548661	183548662	en	0.343719	1.54e-17	1.1	0.000227	0	3:181511166-3:183769683
ENSG00000180921	NA	FAM83H	Brain_Cerebellar_Hemisphere1	gtex	protein_coding	chr8	144817310	144817311	en	0.435548	2.99e-23	0.853	0.000226	0	8:144236881-8:146303788
ENSG00000156194	NA	PPEF2	Brain_Cerebellar_Hemisphere1	gtex	protein_coding	chr4	76810562	76810563	en	0.261177	4.96e-13	-0.251	0.000226	0	4:77130707-4:79093979
ENSG00000071894	NA	CPSF1	Brain_Cerebellar_Hemisphere1	gtex	protein_coding	chr8	145634990	145634991	en	0.699085	5.55e-47	0.838	0.000225	0	8:144236881-8:146303788
ENSG00000138767	NA	CNOT6L	Brain_Cerebellar_Hemisphere1	gtex	protein_coding	chr4	78668011	78668012	en	0.35929	1.89e-18	0.182	0.000224	0	4:77130707-4:79093979
ENSG00000149929	NA	HIRIP3	Brain_Cerebellar_Hemisphere1	gtex	protein_coding	chr16	30010694	30010695	en	0.0613923	0.000946491	0.0438	0.000224	0	16:29036613-16:31382470
ENSG00000186007	NA	LEMD1	Brain_Cerebellar_Hemisphere1	gtex	protein_coding	chr1	205367007	205367008	en	0.0319242	0.0179933	0.77	0.000224	0	1:204681068-1:205922403
ENSG00000196502	NA	SULT1A1	Brain_Cerebellar_Hemisphere1	gtex	protein_coding	chr16	28651106	28651107	en	0.181041	4.36e-09	-0.297	0.000223	0	16:29036613-16:31382470
ENSG00000187954	NA	CYHR1	Brain_Cerebellar_Hemisphere1	gtex	protein_coding	chr8	145651826	145651827	en	0.124869	1.61e-06	0.803	0.000222	0	8:144236881-8:146303788
ENSG00000103485	NA	QPRT	Brain_Cerebellar_Hemisphere1	gtex	protein_coding	chr16	29675566	29675567	en	0.187496	2.17e-09	0.0575	0.000222	0	16:29036613-16:31382470
ENSG00000179832	NA	MROH1	Brain_Cerebellar_Hemisphere1	gtex	protein_coding	chr8	145265485	145265486	en	0.110838	6.74e-06	-0.823	0.000221	0	8:144236881-8:146303788
ENSG00000169288	NA	MRPL1	Brain_Cerebellar_Hemisphere1	gtex	protein_coding	chr4	78827495	78827496	en	0.0442138	0.00522247	0.108	0.00022	0	4:77130707-4:79093979
ENSG00000182782	NA	HCAR2	Brain_Cerebellar_Hemisphere1	gtex	protein_coding	chr12	123169948	123169949	en	0.064798	0.000675136	1.33	0.000219	0	12:122009763-12:124976982
ENSG00000130921	NA	C12orf65	Brain_Cerebellar_Hemisphere1	gtex	protein_coding	chr12	123739480	123739481	en	0.0288341	0.0246679	-1.31	0.000217	0	12:122009763-12:124976982
ENSG00000143537	NA	ADAM15	Brain_Cerebellar_Hemisphere1	gtex	protein_coding	chr1	155045991	155045992	en	0.313481	7.93e-16	0.402	0.000216	0	1:154770403-1:156336133
ENSG00000137449	NA	CPEB2	Brain_Cerebellar_Hemisphere1	gtex	protein_coding	chr4	15030021	15030022	en	0.0614332	0.000942665	0.148	0.000216	0	4:15147446-4:15926136
ENSG00000167702	NA	KIFC2	Brain_Cerebellar_Hemisphere1	gtex	protein_coding	chr8	145690185	145690186	en	0.181932	3.96e-09	-0.789	0.000216	0	8:144236881-8:146303788
ENSG00000003987	NA	MTMR7	Brain_Cerebellar_Hemisphere1	gtex	protein_coding	chr8	17167034	17167035	en	0.0491853	0.00318146	0.815	0.000216	0	8:15991660-8:17387624
ENSG00000090975	NA	PITPNM2	Brain_Cerebellar_Hemisphere1	gtex	protein_coding	chr12	123609916	123609917	en	0.179882	4.95e-09	1.28	0.000216	0	12:122009763-12:124976982
ENSG00000171428	NA	NAT1	Brain_Cerebellar_Hemisphere1	gtex	protein_coding	chr8	18084765	18084766	en	0.108085	8.91e-06	0.807	0.000215	0	8:15991660-8:17387624
ENSG00000139697	NA	SBNO1	Brain_Cerebellar_Hemisphere1	gtex	protein_coding	chr12	123831834	123831835	en	0.0562083	0.00158312	-0.512	0.000214	0	12:122009763-12:124976982
ENSG00000168778	NA	TCTN2	Brain_Cerebellar_Hemisphere1	gtex	protein_coding	chr12	124201793	124201794	en	0.290039	1.5e-14	0.571	0.000214	0	12:122009763-12:124976982
ENSG00000176383	NA	B3GNT4	Brain_Cerebellar_Hemisphere1	gtex	protein_coding	chr12	122740136	122740137	en	0.0268329	0.0303042	-0.794	0.000212	0	12:122009763-12:124976982
ENSG00000198952	NA	SMG5	Brain_Cerebellar_Hemisphere1	gtex	protein_coding	chr1	156657922	156657923	en	0.0645774	0.000690072	-0.233	0.000212	0	1:154770403-1:156336133
ENSG00000153086	NA	ACMSD	Brain_Cerebellar_Hemisphere1	gtex	protein_coding	chr2	135661346	135661347	en	0.0249019	0.0370087	0.699	0.000211	0	2:135159453-2:137042794
ENSG00000129083	NA	COPB1	Brain_Cerebellar_Hemisphere1	gtex	protein_coding	chr11	14500932	14500933	en	0.0892861	5.9e-05	-0.782	0.000211	0	11:13373433-11:15742397
ENSG00000158711	NA	ELK4	Brain_Cerebellar_Hemisphere1	gtex	protein_coding	chr1	205584244	205584245	en	0.0324101	0.0171261	1.06	0.000211	0	1:204681068-1:205922403
ENSG00000227189	NA	AC092535.2	Brain_Cerebellar_Hemisphere1	gtex	lncRNA	chr4	1234490	1234491	en	0.0295783	0.0228575	0.0791	0.00021	0	4:695146-4:1478711
ENSG00000242252	NA	BGLAP	Brain_Cerebellar_Hemisphere1	gtex	protein_coding	chr1	156183726	156183727	en	0.0311372	0.0194941	0.139	0.00021	0	1:154770403-1:156336133
ENSG00000111358	NA	GTF2H3	Brain_Cerebellar_Hemisphere1	gtex	protein_coding	chr12	124139597	124139598	en	0.123662	1.82e-06	-0.0915	0.00021	0	12:122009763-12:124976982
ENSG00000256092	NA	SBNO1-AS1	Brain_Cerebellar_Hemisphere1	gtex	lncRNA	chr12	123849135	123849136	en	0.275515	8.88e-14	0.362	0.00021	0	12:122009763-12:124976982
ENSG00000237390	NA	AL139130.1	Brain_Cerebellar_Hemisphere1	gtex	lncRNA	chr1	156353940	156353941	en	0.11999	2.66e-06	0.00198	0.000209	0	1:154770403-1:156336133
ENSG00000180900	NA	SCRIB	Brain_Cerebellar_Hemisphere1	gtex	protein_coding	chr8	144889504	144889505	en	0.0350156	0.013152	0.753	0.000209	0	8:144236881-8:146303788
ENSG00000147813	NA	NAPRT	Brain_Cerebellar_Hemisphere1	gtex	protein_coding	chr8	144659377	144659378	en	0.641277	2.31e-40	0.732	0.000206	0	8:144236881-8:146303788
ENSG00000104524	NA	PYCR3	Brain_Cerebellar_Hemisphere1	gtex	protein_coding	chr8	144685109	144685110	en	0.0382449	0.00949744	0.724	0.000206	0	8:144236881-8:146303788
ENSG00000255050	NA	AC067930.4	Brain_Cerebellar_Hemisphere1	gtex	lncRNA	chr8	144644577	144644578	en	0.45218	2.21e-24	0.724	0.000205	0	8:144236881-8:146303788
ENSG00000272172	NA	AC138696.2	Brain_Cerebellar_Hemisphere1	gtex	lncRNA	chr8	144361447	144361448	en	0.149631	1.24e-07	-0.716	0.000204	0	8:144236881-8:146303788
ENSG00000131791	NA	PRKAB2	Brain_Cerebellar_Hemisphere1	gtex	protein_coding	chr1	146895191	146895192	en	0.174913	8.45e-09	-0.731	0.000204	0	1:144977648-1:148360712
ENSG00000204428	NA	LY6G5C	Brain_Cerebellar_Hemisphere1	gtex	protein_coding	chr6	31649680	31649681	en	0.643064	1.5e-40	0.708	0.000202	0	6:31571337-6:32682664
ENSG00000179886	NA	TIGD5	Brain_Cerebellar_Hemisphere1	gtex	protein_coding	chr8	144694578	144694579	en	0.135551	5.37e-07	-0.691	0.000201	0	8:144236881-8:146303788
ENSG00000090316	NA	MAEA	Brain_Cerebellar_Hemisphere1	gtex	protein_coding	chr4	1301450	1301451	en	0.195826	8.7e-10	1.52	0.0002	0	4:695146-4:1478711
ENSG00000131781	NA	FMO5	Brain_Cerebellar_Hemisphere1	gtex	protein_coding	chr1	146746343	146746344	en	0.0276914	0.0277392	-0.7	0.000199	0	1:144977648-1:148360712
ENSG00000204839	NA	MROH6	Brain_Cerebellar_Hemisphere1	gtex	protein_coding	chr8	144637683	144637684	en	0.550507	7.42e-32	0.677	0.000199	0	8:144236881-8:146303788
ENSG00000172318	NA	B3GALT1	Brain_Cerebellar_Hemisphere1	gtex	protein_coding	chr2	168793653	168793654	en	0.229482	2e-11	0.686	0.000197	0	2:167356254-2:169968112
ENSG00000188613	NA	NANOS1	Brain_Cerebellar_Hemisphere1	gtex	protein_coding	chr10	120816204	120816205	en	0.101541	1.73e-05	0.667	0.000197	0	10:120591693-10:122407323
ENSG00000198502	NA	HLA-DRB5	Brain_Cerebellar_Hemisphere1	gtex	protein_coding	chr6	32492876	32492877	en	0.572393	9.71e-34	0.663	0.000196	0	6:31571337-6:32682664
ENSG00000104522	NA	TSTA3	Brain_Cerebellar_Hemisphere1	gtex	protein_coding	chr8	144738593	144738594	en	0.0223077	0.0485256	-0.658	0.000196	0	8:144236881-8:146303788
ENSG00000133818	NA	RRAS2	Brain_Cerebellar_Hemisphere1	gtex	protein_coding	chr11	14292416	14292417	en	0.0628983	0.000815149	0.673	0.000195	0	11:13373433-11:15742397
ENSG00000203499	NA	IQANK1	Brain_Cerebellar_Hemisphere1	gtex	protein_coding	chr8	144847667	144847668	en	0.378312	1.36e-19	0.645	0.000194	0	8:144236881-8:146303788
ENSG00000090539	NA	CHRD	Brain_Cerebellar_Hemisphere1	gtex	protein_coding	chr3	184160988	184160989	en	0.305641	2.14e-15	0.811	0.000193	0	3:181511166-3:183769683
ENSG00000144224	NA	UBXN4	Brain_Cerebellar_Hemisphere1	gtex	protein_coding	chr2	136504742	136504743	en	0.091215	4.87e-05	0.601	0.000193	0	2:135159453-2:137042794
ENSG00000131778	NA	CHD1L	Brain_Cerebellar_Hemisphere1	gtex	protein_coding	chr1	146725025	146725026	en	0.374405	2.35e-19	0.642	0.000192	0	1:144977648-1:148360712
ENSG00000176681	NA	LRRC37A	Brain_Cerebellar_Hemisphere1	gtex	protein_coding	chr17	44373721	44373722	en	0.613638	1.45e-37	2.93	0.000192	0	17:43056905-17:45876022
ENSG00000272824	NA	AC245100.6	Brain_Cerebellar_Hemisphere1	gtex	lncRNA	chr1	147776311	147776312	en	0.084962	9.09e-05	-0.628	0.00019	0	1:144977648-1:148360712
ENSG00000213722	NA	DDAH2	Brain_Cerebellar_Hemisphere1	gtex	protein_coding	chr6	31683989	31683990	en	0.174721	8.63e-09	0.602	0.000189	0	6:31571337-6:32682664
ENSG00000185829	NA	ARL17A	Brain_Cerebellar_Hemisphere1	gtex	protein_coding	chr17	44587251	44587252	en	0.581608	1.46e-34	-0.436	0.000187	0	17:43056905-17:45876022
ENSG00000227617	NA	CERS6-AS1	Brain_Cerebellar_Hemisphere1	gtex	lncRNA	chr2	169637667	169637668	en	0.0773459	0.000194165	-0.604	0.000187	0	2:167356254-2:169968112
ENSG00000119979	NA	DENND10	Brain_Cerebellar_Hemisphere1	gtex	protein_coding	chr10	120879208	120879209	en	0.0421492	0.00641984	-0.575	0.000187	0	10:120591693-10:122407323
ENSG00000168301	NA	KCTD6	Brain_Cerebellar_Hemisphere1	gtex	protein_coding	chr3	58582171	58582172	en	0.0562706	0.00157336	-0.568	0.000187	0	3:58157850-3:60272829
ENSG00000139116	NA	KIF21A	Brain_Cerebellar_Hemisphere1	gtex	protein_coding	chr12	39755307	39755308	en	0.0730418	0.00029785	-0.604	0.000187	0	12:39227446-12:40816185
ENSG00000136068	NA	FLNB	Brain_Cerebellar_Hemisphere1	gtex	protein_coding	chr3	58063686	58063687	en	0.430407	6.58e-23	-0.553	0.000186	0	3:58157850-3:60272829
ENSG00000204305	NA	AGER	Brain_Cerebellar_Hemisphere1	gtex	protein_coding	chr6	32169746	32169747	en	0.143833	2.27e-07	-0.542	0.000182	0	6:31571337-6:32682664
ENSG00000237188	NA	AC242426.2	Brain_Cerebellar_Hemisphere1	gtex	lncRNA	chr1	146692268	146692269	en	0.0801334	0.000147122	0.538	0.000181	0	1:144977648-1:148360712
ENSG00000204390	NA	HSPA1L	Brain_Cerebellar_Hemisphere1	gtex	protein_coding	chr6	31768989	31768990	en	0.113009	5.41e-06	0.52	0.000181	0	6:31571337-6:32682664
ENSG00000104213	NA	PDGFRL	Brain_Cerebellar_Hemisphere1	gtex	protein_coding	chr8	17468880	17468881	en	0.15723	5.56e-08	0.547	0.000181	0	8:15991660-8:17387624
ENSG00000179698	NA	WDR97	Brain_Cerebellar_Hemisphere1	gtex	protein_coding	chr8	145119471	145119472	en	0.517734	3.37e-29	0.51	0.000181	0	8:144236881-8:146303788
ENSG00000163686	NA	ABHD6	Brain_Cerebellar_Hemisphere1	gtex	protein_coding	chr3	58191740	58191741	en	0.120359	2.56e-06	-0.5	0.00018	0	3:58157850-3:60272829
ENSG00000181097	NA	AC105219.1	Brain_Cerebellar_Hemisphere1	gtex	lncRNA	chr8	144768339	144768340	en	0.0468374	0.00401965	0.506	0.00018	0	8:144236881-8:146303788
ENSG00000184305	NA	CCSER1	Brain_Cerebellar_Hemisphere1	gtex	protein_coding	chr4	92217639	92217640	en	0.1103	7.12e-06	-0.524	0.00018	0	4:90231746-4:91560677
ENSG00000241106	NA	HLA-DOB	Brain_Cerebellar_Hemisphere1	gtex	protein_coding	chr6	32778563	32778564	en	0.556352	2.38e-32	-0.512	0.00018	0	6:31571337-6:32682664
ENSG00000255224	NA	AC109322.1	Brain_Cerebellar_Hemisphere1	gtex	lncRNA	chr8	145133089	145133090	en	0.046427	0.00418752	0.495	0.000179	0	8:144236881-8:146303788
ENSG00000238083	NA	LRRC37A2	Brain_Cerebellar_Hemisphere1	gtex	protein_coding	chr17	44463213	44463214	en	0.672032	9.7e-44	-5.29	0.000179	0	17:43056905-17:45876022
ENSG00000262655	NA	SPON1	Brain_Cerebellar_Hemisphere1	gtex	protein_coding	chr11	14031050	14031051	en	0.246399	2.83e-12	0.522	0.000179	0	11:13373433-11:15742397
ENSG00000204351	NA	SKIV2L	Brain_Cerebellar_Hemisphere1	gtex	protein_coding	chr6	31933793	31933794	en	0.364285	9.54e-19	0.476	0.000177	0	6:31571337-6:32682664
ENSG00000114770	NA	ABCC5	Brain_Cerebellar_Hemisphere1	gtex	protein_coding	chr3	183714202	183714203	en	0.220699	5.43e-11	0.854	0.000174	0	3:181511166-3:183769683
ENSG00000213719	NA	CLIC1	Brain_Cerebellar_Hemisphere1	gtex	protein_coding	chr6	31619576	31619577	en	0.0313674	0.0190423	-0.452	0.000174	0	6:31571337-6:32682664
ENSG00000163684	NA	RPP14	Brain_Cerebellar_Hemisphere1	gtex	protein_coding	chr3	58280896	58280897	en	0.174493	8.85e-09	-0.392	0.000174	0	3:58157850-3:60272829
ENSG00000160949	NA	TONSL	Brain_Cerebellar_Hemisphere1	gtex	protein_coding	chr8	145667071	145667072	en	0.187475	2.17e-09	-0.425	0.000174	0	8:144236881-8:146303788
ENSG00000175548	NA	ALG10B	Brain_Cerebellar_Hemisphere1	gtex	protein_coding	chr12	38946249	38946250	en	0.13861	3.91e-07	0.448	0.000173	0	12:39227446-12:40816185
ENSG00000104529	NA	EEF1D	Brain_Cerebellar_Hemisphere1	gtex	protein_coding	chr8	144422353	144422354	en	0.0229044	0.0455813	0.408	0.000173	0	8:144236881-8:146303788
ENSG00000179091	NA	CYC1	Brain_Cerebellar_Hemisphere1	gtex	protein_coding	chr8	145138585	145138586	en	0.0509039	0.00268147	-0.393	0.000171	0	8:144236881-8:146303788
ENSG00000104518	NA	GSDMD	Brain_Cerebellar_Hemisphere1	gtex	protein_coding	chr8	144630238	144630239	en	0.208457	2.15e-10	0.381	0.000171	0	8:144236881-8:146303788
ENSG00000255559	NA	ZNF252P-AS1	Brain_Cerebellar_Hemisphere1	gtex	lncRNA	chr8	146242733	146242734	en	0.0239663	0.0407933	-0.386	0.000171	0	8:144236881-8:146303788
ENSG00000196378	NA	ZNF34	Brain_Cerebellar_Hemisphere1	gtex	protein_coding	chr8	145988401	145988402	en	0.213827	1.18e-10	0.331	0.000171	0	8:144236881-8:146303788
ENSG00000164182	NA	NDUFAF2	Brain_Cerebellar_Hemisphere1	gtex	protein_coding	chr5	60242665	60242666	en	0.0243993	0.0389943	-0.372	0.00017	0	5:58524622-5:60935451
ENSG00000204356	NA	NELFE	Brain_Cerebellar_Hemisphere1	gtex	protein_coding	chr6	31968262	31968263	en	0.0660114	0.000598558	-0.379	0.00017	0	6:31571337-6:32682664
ENSG00000179526	NA	SHARPIN	Brain_Cerebellar_Hemisphere1	gtex	protein_coding	chr8	145149368	145149369	en	0.0319178	0.0180049	0.367	0.00017	0	8:144236881-8:146303788
ENSG00000163072	NA	NOSTRIN	Brain_Cerebellar_Hemisphere1	gtex	protein_coding	chr2	169682619	169682620	en	0.0259266	0.0332786	-0.381	0.000168	0	2:167356254-2:169968112
ENSG00000259251	NA	AC104590.1	Brain_Cerebellar_Hemisphere1	gtex	lncRNA	chr15	62356723	62356724	en	0.104821	1.24e-05	0.375	0.000167	0	15:61266132-15:63215222
ENSG00000204421	NA	LY6G6C	Brain_Cerebellar_Hemisphere1	gtex	protein_coding	chr6	31672714	31672715	en	0.0336395	0.0151174	-0.326	0.000166	0	6:31571337-6:32682664
ENSG00000129003	NA	VPS13C	Brain_Cerebellar_Hemisphere1	gtex	protein_coding	chr15	62164813	62164814	en	0.073161	0.000294342	0.353	0.000166	0	15:61266132-15:63215222
ENSG00000198791	NA	CNOT7	Brain_Cerebellar_Hemisphere1	gtex	protein_coding	chr8	17109990	17109991	en	0.335788	4.41e-17	-0.323	0.000165	0	8:15991660-8:17387624
ENSG00000115866	NA	DARS	Brain_Cerebellar_Hemisphere1	gtex	protein_coding	chr2	136899468	136899469	en	0.0704884	0.000383824	-0.112	0.000165	0	2:135159453-2:137042794
ENSG00000076003	NA	MCM6	Brain_Cerebellar_Hemisphere1	gtex	protein_coding	chr2	137078935	137078936	en	0.0698888	0.000407369	0.0382	0.000165	0	2:135159453-2:137042794
ENSG00000183309	NA	ZNF623	Brain_Cerebellar_Hemisphere1	gtex	protein_coding	chr8	144726516	144726517	en	0.312738	8.72e-16	-0.271	0.000165	0	8:144236881-8:146303788
ENSG00000261150	NA	EPPK1	Brain_Cerebellar_Hemisphere1	gtex	protein_coding	chr8	144955507	144955508	en	0.270336	1.66e-13	-0.246	0.000164	0	8:144236881-8:146303788
ENSG00000231389	NA	HLA-DPA1	Brain_Cerebellar_Hemisphere1	gtex	protein_coding	chr6	33019426	33019427	en	0.502581	4.96e-28	0.288	0.000164	0	6:31571337-6:32682664
ENSG00000272115	NA	AC233992.3	Brain_Cerebellar_Hemisphere1	gtex	lncRNA	chr8	145618087	145618088	en	0.0435693	0.00556981	-0.237	0.000163	0	8:144236881-8:146303788
ENSG00000058063	NA	ATP11B	Brain_Cerebellar_Hemisphere1	gtex	protein_coding	chr3	182533474	182533475	en	0.0977858	2.52e-05	-0.698	0.000163	0	3:181511166-3:183769683
ENSG00000184428	NA	TOP1MT	Brain_Cerebellar_Hemisphere1	gtex	protein_coding	chr8	144415416	144415417	en	0.23873	6.9e-12	-0.238	0.000163	0	8:144236881-8:146303788
ENSG00000140416	NA	TPM1	Brain_Cerebellar_Hemisphere1	gtex	protein_coding	chr15	63121028	63121029	en	0.527944	5.24e-30	-0.284	0.000163	0	15:61266132-15:63215222
ENSG00000173137	NA	ADCK5	Brain_Cerebellar_Hemisphere1	gtex	protein_coding	chr8	145622073	145622074	en	0.0519919	0.00240656	-0.193	0.000162	0	8:144236881-8:146303788
ENSG00000108379	NA	WNT3	Brain_Cerebellar_Hemisphere1	gtex	protein_coding	chr17	44897451	44897452	en	0.440058	1.49e-23	-6.13	0.000162	0	17:43056905-17:45876022
ENSG00000181638	NA	ZFP41	Brain_Cerebellar_Hemisphere1	gtex	protein_coding	chr8	144347200	144347201	en	0.10301	1.49e-05	-0.199	0.000162	0	8:144236881-8:146303788
ENSG00000251575	NA	C5orf64-AS1	Brain_Cerebellar_Hemisphere1	gtex	lncRNA	chr5	60984717	60984718	en	0.0667833	0.00055443	0.103	0.000161	0	5:58524622-5:60935451
ENSG00000250571	NA	GLI4	Brain_Cerebellar_Hemisphere1	gtex	protein_coding	chr8	144345327	144345328	en	0.0508031	0.00270849	-0.152	0.000161	0	8:144236881-8:146303788
ENSG00000204252	NA	HLA-DOA	Brain_Cerebellar_Hemisphere1	gtex	protein_coding	chr6	32912690	32912691	en	0.475757	4.79e-26	-0.159	0.000161	0	6:31571337-6:32682664
ENSG00000204344	NA	STK19	Brain_Cerebellar_Hemisphere1	gtex	protein_coding	chr6	31944919	31944920	en	0.196439	8.13e-10	0.201	0.000161	0	6:31571337-6:32682664
ENSG00000176956	NA	LY6H	Brain_Cerebellar_Hemisphere1	gtex	protein_coding	chr8	144290254	144290255	en	0.232385	1.43e-11	-0.0954	0.00016	0	8:144236881-8:146303788
ENSG00000273261	NA	AC092953.2	Brain_Cerebellar_Hemisphere1	gtex	lncRNA	chr3	182933400	182933401	en	0.0254662	0.0349039	-1.51	0.000159	0	3:181511166-3:183769683
ENSG00000254973	NA	AC105219.4	Brain_Cerebellar_Hemisphere1	gtex	lncRNA	chr8	144849993	144849994	en	0.253411	1.24e-12	0.0316	0.000159	0	8:144236881-8:146303788
ENSG00000253716	NA	MINCR	Brain_Cerebellar_Hemisphere1	gtex	lncRNA	chr8	144334374	144334375	en	0.400253	5.91e-21	0.0653	0.000159	0	8:144236881-8:146303788
ENSG00000147804	NA	SLC39A4	Brain_Cerebellar_Hemisphere1	gtex	protein_coding	chr8	145646833	145646834	en	0.202279	4.27e-10	-0.0391	0.000159	0	8:144236881-8:146303788
ENSG00000185730	NA	ZNF696	Brain_Cerebellar_Hemisphere1	gtex	protein_coding	chr8	144381827	144381828	en	0.0372973	0.0104476	0.0132	0.000159	0	8:144236881-8:146303788
ENSG00000104763	NA	ASAH1	Brain_Cerebellar_Hemisphere1	gtex	protein_coding	chr8	18008463	18008464	en	0.216668	8.55e-11	0.125	0.000158	0	8:15991660-8:17387624
ENSG00000213760	NA	ATP6V1G2	Brain_Cerebellar_Hemisphere1	gtex	protein_coding	chr6	31785138	31785139	en	0.0394591	0.00840668	0.0203	0.000158	0	6:31571337-6:32682664
ENSG00000018236	NA	CNTN1	Brain_Cerebellar_Hemisphere1	gtex	protein_coding	chr12	41241272	41241273	en	0.341622	2.04e-17	0.0473	0.000158	0	12:40816185-12:41658193
ENSG00000155970	NA	MICU3	Brain_Cerebellar_Hemisphere1	gtex	protein_coding	chr8	16962321	16962322	en	0.0381591	0.00957972	0.15	0.000158	0	8:15991660-8:17387624
ENSG00000204308	NA	RNF5	Brain_Cerebellar_Hemisphere1	gtex	protein_coding	chr6	32154390	32154391	en	0.273167	1.18e-13	0.000806	0.000158	0	6:31571337-6:32682664
ENSG00000168477	NA	TNXB	Brain_Cerebellar_Hemisphere1	gtex	protein_coding	chr6	32229909	32229910	en	0.0365548	0.0112592	-0.0773	0.000158	0	6:31571337-6:32682664
ENSG00000259370	NA	AC103740.1	Brain_Cerebellar_Hemisphere1	gtex	lncRNA	chr15	63161183	63161184	en	0.327185	1.36e-16	-0.0631	0.000157	0	15:61266132-15:63215222
ENSG00000148925	NA	BTBD10	Brain_Cerebellar_Hemisphere1	gtex	protein_coding	chr11	13451049	13451050	en	0.132803	7.13e-07	-0.0619	0.000157	0	11:13373433-11:15742397
ENSG00000271425	NA	NBPF10	Brain_Cerebellar_Hemisphere1	gtex	protein_coding	chr1	145442887	145442888	en	0.210568	1.7e-10	-0.0782	0.000157	0	1:144977648-1:148360712
ENSG00000151229	NA	SLC2A13	Brain_Cerebellar_Hemisphere1	gtex	protein_coding	chr12	40139885	40139886	en	0.0326892	0.0166473	0.04	0.000157	0	12:39227446-12:40816185
ENSG00000104219	NA	ZDHHC2	Brain_Cerebellar_Hemisphere1	gtex	protein_coding	chr8	17112085	17112086	en	0.103214	1.46e-05	-0.0379	0.000157	0	8:15991660-8:17387624
ENSG00000178852	NA	EFCAB13	Brain_Cerebellar_Hemisphere1	gtex	protein_coding	chr17	45451799	45451800	en	0.254816	1.05e-12	-0.511	0.000148	0	17:43056905-17:45876022
ENSG00000159674	NA	SPON2	Brain_Cerebellar_Hemisphere1	gtex	protein_coding	chr4	1138401	1138402	en	0.136201	5.02e-07	-0.667	0.000148	0	4:695146-4:1478711
ENSG00000159692	NA	CTBP1	Brain_Cerebellar_Hemisphere1	gtex	protein_coding	chr4	1240420	1240421	en	0.0252541	0.0356801	-0.727	0.000144	0	4:695146-4:1478711
ENSG00000120071	NA	KANSL1	Brain_Cerebellar_Hemisphere1	gtex	protein_coding	chr17	44479703	44479704	en	0.441645	1.16e-23	1.84	0.000141	0	17:43056905-17:45876022
ENSG00000073969	NA	NSF	Brain_Cerebellar_Hemisphere1	gtex	protein_coding	chr17	44780063	44780064	en	0.221082	5.2e-11	4.78	0.000141	0	17:43056905-17:45876022
ENSG00000169026	NA	SLC49A3	Brain_Cerebellar_Hemisphere1	gtex	protein_coding	chr4	686766	686767	en	0.180873	4.45e-09	-0.304	0.000139	0	4:695146-4:1478711
ENSG00000267288	NA	AC138150.2	Brain_Cerebellar_Hemisphere1	gtex	lncRNA	chr17	43281330	43281331	en	0.142313	2.66e-07	-1.27	0.000137	0	17:43056905-17:45876022
ENSG00000273179	NA	AC092535.5	Brain_Cerebellar_Hemisphere1	gtex	lncRNA	chr4	1165366	1165367	en	0.223832	3.8e-11	-0.541	0.000136	0	4:695146-4:1478711
ENSG00000196810	NA	CTBP1-DT	Brain_Cerebellar_Hemisphere1	gtex	lncRNA	chr4	1268472	1268473	en	0.427609	1.01e-22	0.935	0.000136	0	4:695146-4:1478711
ENSG00000263293	NA	AC068234.2	Brain_Cerebellar_Hemisphere1	gtex	lncRNA	chr17	45389939	45389940	en	0.0898047	5.6e-05	0.616	0.000134	0	17:43056905-17:45876022
ENSG00000181513	NA	ACBD4	Brain_Cerebellar_Hemisphere1	gtex	protein_coding	chr17	43152743	43152744	en	0.317008	5.05e-16	0.302	0.000132	0	17:43056905-17:45876022
ENSG00000006025	NA	OSBPL7	Brain_Cerebellar_Hemisphere1	gtex	protein_coding	chr17	45879920	45879921	en	0.0225134	0.0474887	-0.308	0.000132	0	17:43056905-17:45876022
ENSG00000163945	NA	UVSSA	Brain_Cerebellar_Hemisphere1	gtex	protein_coding	chr4	1332412	1332413	en	0.385192	5.15e-20	-0.359	0.000132	0	4:695146-4:1478711
ENSG00000233885	NA	YEATS2-AS1	Brain_Cerebellar_Hemisphere1	gtex	lncRNA	chr3	183531278	183531279	en	0.491891	3.16e-27	-0.651	0.000132	0	3:181511166-3:183769683
ENSG00000262879	NA	AC005670.3	Brain_Cerebellar_Hemisphere1	gtex	lncRNA	chr17	45085253	45085254	en	0.474399	6e-26	-0.669	0.000129	0	17:43056905-17:45876022
ENSG00000006062	NA	MAP3K14	Brain_Cerebellar_Hemisphere1	gtex	protein_coding	chr17	43362510	43362511	en	0.0424127	0.00625272	-2.04	0.000128	0	17:43056905-17:45876022
ENSG00000267198	NA	AC091132.4	Brain_Cerebellar_Hemisphere1	gtex	lncRNA	chr17	44204606	44204607	en	0.275188	9.24e-14	1.98	0.000124	0	17:43056905-17:45876022
ENSG00000108883	NA	EFTUD2	Brain_Cerebellar_Hemisphere1	gtex	protein_coding	chr17	42951492	42951493	en	0.116646	3.74e-06	1.44	0.000124	0	17:43056905-17:45876022
ENSG00000214401	NA	KANSL1-AS1	Brain_Cerebellar_Hemisphere1	gtex	lncRNA	chr17	44276912	44276913	en	0.605615	8.64e-37	1.26	0.000123	0	17:43056905-17:45876022
ENSG00000233175	NA	AC008105.1	Brain_Cerebellar_Hemisphere1	gtex	lncRNA	chr17	43295964	43295965	en	0.419927	3.23e-22	1.49	0.000117	0	17:43056905-17:45876022
ENSG00000225190	NA	PLEKHM1	Brain_Cerebellar_Hemisphere1	gtex	protein_coding	chr17	43534916	43534917	en	0.554791	3.23e-32	-0.167	0.000117	0	17:43056905-17:45876022
ENSG00000267750	NA	RUNDC3A-AS1	Brain_Cerebellar_Hemisphere1	gtex	lncRNA	chr17	42830491	42830492	en	0.187263	2.22e-09	1.66	0.000117	0	17:43056905-17:45876022
ENSG00000264920	NA	AC018521.5	Brain_Cerebellar_Hemisphere1	gtex	lncRNA	chr17	45967422	45967423	en	0.189457	1.75e-09	0.139	0.000115	0	17:43056905-17:45876022
ENSG00000108433	NA	GOSR2	Brain_Cerebellar_Hemisphere1	gtex	protein_coding	chr17	44984239	44984240	en	0.169123	1.57e-08	-1.41	0.000115	0	17:43056905-17:45876022
ENSG00000120093	NA	HOXB3	Brain_Cerebellar_Hemisphere1	gtex	protein_coding	chr17	46669892	46669893	en	0.251707	1.52e-12	0.0655	0.000115	0	17:43056905-17:45876022
ENSG00000267080	NA	ASB16-AS1	Brain_Cerebellar_Hemisphere1	gtex	lncRNA	chr17	42435687	42435688	en	0.239529	6.29e-12	-0.0543	0.000114	0	17:43056905-17:45876022
ENSG00000179673	NA	RPRML	Brain_Cerebellar_Hemisphere1	gtex	protein_coding	chr17	45065620	45065621	en	0.0451322	0.00476488	-1.05	0.000114	0	17:43056905-17:45876022
ENSG00000138722	NA	MMRN1	Brain_Cerebellum1	gtex	protein_coding	chr4	90835294	90835295	en	0.141672	1.95e-08	6.39	1	1	4:90231746-4:91560677
ENSG00000117280	NA	RAB29	Brain_Cerebellum1	gtex	protein_coding	chr1	205745384	205745385	en	0.240443	4.84e-14	5.89	1	0	1:204681068-1:205922403
ENSG00000138760	NA	SCARB2	Brain_Cerebellum1	gtex	protein_coding	chr4	77124090	77124091	en	0.101811	2.49e-06	5.02	0.954	0	4:77130707-4:79093979
ENSG00000130783	NA	CCDC62	Brain_Cerebellum1	gtex	protein_coding	chr12	123350630	123350631	en	0.111884	7.42e-07	5.55	0.894	1	12:122009763-12:124976982
ENSG00000230658	NA	KLHL7-DT	Brain_Cerebellum1	gtex	lncRNA	chr7	23150053	23150054	en	0.449882	1.13e-28	-4.7	0.876	1	7:22508611-7:23469560
ENSG00000127419	NA	TMEM175	Brain_Cerebellum1	gtex	protein_coding	chr4	924469	924470	en	0.213324	1.93e-12	-6.37	0.775	1	4:695146-4:1478711
ENSG00000080854	NA	IGSF9B	Brain_Cerebellum1	gtex	protein_coding	chr11	133807396	133807397	en	0.247618	1.79e-14	-4.53	0.774	1	11:133000260-11:134205993
ENSG00000214941	NA	ZSWIM7	Brain_Cerebellum1	gtex	protein_coding	chr17	15869698	15869699	en	0.425497	1.03e-26	-4.94	0.595	1	17:15020965-17:16411522
ENSG00000004468	NA	CD38	Brain_Cerebellum1	gtex	protein_coding	chr4	15822790	15822791	en	0.0881209	1.27e-05	-4.17	0.578	1	4:15147446-4:15926136
ENSG00000237765	NA	FAM200B	Brain_Cerebellum1	gtex	protein_coding	chr4	15688490	15688491	en	0.225386	3.81e-13	4.15	0.553	1	4:15147446-4:15926136
ENSG00000169242	NA	EFNA1	Brain_Cerebellum1	gtex	protein_coding	chr1	155115897	155115898	en	0.169818	5.67e-10	4.21	0.434	1	1:154770403-1:156336133
ENSG00000145214	NA	DGKQ	Brain_Cerebellum1	gtex	protein_coding	chr4	978075	978076	en	0.219367	8.59e-13	-4.7	0.428	1	4:695146-4:1478711
ENSG00000272588	NA	AC139887.4	Brain_Cerebellum1	gtex	lncRNA	chr4	747830	747831	en	0.0793684	3.59e-05	-3.59	0.409	1	4:695146-4:1478711
ENSG00000178222	NA	RNF212	Brain_Cerebellum1	gtex	protein_coding	chr4	1083251	1083252	en	0.233515	1.26e-13	2.86	0.401	1	4:695146-4:1478711
ENSG00000196118	NA	CCDC189	Brain_Cerebellum1	gtex	protein_coding	chr16	30793318	30793319	en	0.0420856	0.00288478	5.34	0.344	1	16:29036613-16:31382470
ENSG00000170425	NA	ADORA2B	Brain_Cerebellum1	gtex	protein_coding	chr17	15847615	15847616	en	0.104148	1.88e-06	4.81	0.333	0	17:15020965-17:16411522
ENSG00000185294	NA	SPPL2C	Brain_Cerebellum1	gtex	protein_coding	chr17	43929914	43929915	en	0.37745	4.45e-23	-9.26	0.307	1	17:43056905-17:45876022
ENSG00000279685	NA	MAPT-IT1	Brain_Cerebellum1	gtex	lncRNA	chr17	44096506	44096507	en	0.135548	4.15e-08	-9.25	0.272	1	17:43056905-17:45876022
ENSG00000262766	NA	AC135050.5	Brain_Cerebellum1	gtex	lncRNA	chr16	31123565	31123566	en	0.08233	2.53e-05	-5.28	0.258	1	16:29036613-16:31382470
ENSG00000184922	NA	FMNL1	Brain_Cerebellum1	gtex	protein_coding	chr17	43659177	43659178	en	0.344783	9.26e-21	9.23	0.233	1	17:43056905-17:45876022
ENSG00000178950	NA	GAK	Brain_Cerebellum1	gtex	protein_coding	chr4	875222	875223	en	0.100946	2.76e-06	6.42	0.183	0	4:695146-4:1478711
ENSG00000103510	NA	KAT8	Brain_Cerebellum1	gtex	protein_coding	chr16	31138891	31138892	en	0.400926	8.09e-25	-5.22	0.177	1	16:29036613-16:31382470
ENSG00000267121	NA	AC008105.3	Brain_Cerebellum1	gtex	lncRNA	chr17	43693883	43693884	en	0.1259	1.35e-07	9.2	0.175	0	17:43056905-17:45876022
ENSG00000247775	NA	SNCA-AS1	Brain_Cerebellum1	gtex	lncRNA	chr4	90770105	90770106	en	0.268493	9.33e-16	-3.69	0.174	0	4:90231746-4:91560677
ENSG00000099381	NA	SETD1A	Brain_Cerebellum1	gtex	protein_coding	chr16	30982462	30982463	en	0.0651829	0.000190835	-5.14	0.114	1	16:29036613-16:31382470
ENSG00000130787	NA	HIP1R	Brain_Cerebellum1	gtex	protein_coding	chr12	123309586	123309587	en	0.270616	6.88e-16	-5.14	0.109	0	12:122009763-12:124976982
ENSG00000160767	NA	FAM189B	Brain_Cerebellum1	gtex	protein_coding	chr1	155138069	155138070	en	0.0204993	0.0386285	3.82	0.0918	0	1:154770403-1:156336133
ENSG00000167395	NA	ZNF646	Brain_Cerebellum1	gtex	protein_coding	chr16	31059646	31059647	en	0.0438317	0.00234762	-5.04	0.0731	1	16:29036613-16:31382470
ENSG00000227782	NA	AC002553.1	Brain_Cerebellum1	gtex	lncRNA	chr17	15903472	15903473	en	0.0581328	0.000436832	4.37	0.0463	0	17:15020965-17:16411522
ENSG00000167397	NA	VKORC1	Brain_Cerebellum1	gtex	protein_coding	chr16	31055183	31055184	en	0.029663	0.0126446	4.88	0.0386	0	16:29036613-16:31382470
ENSG00000133256	NA	PDE6B	Brain_Cerebellum1	gtex	protein_coding	chr4	650247	650248	en	0.119296	3.03e-07	2.87	0.0382	0	4:695146-4:1478711
ENSG00000174840	NA	PDE12	Brain_Cerebellum1	gtex	protein_coding	chr3	57713341	57713342	en	0.0192373	0.045198	3.3	0.0307	0	3:58157850-3:60272829
ENSG00000221988	NA	PPT2	Brain_Cerebellum1	gtex	protein_coding	chr6	32165244	32165245	en	0.0801104	3.29e-05	-3.29	0.0302	0	6:31571337-6:32682664
ENSG00000168993	NA	CPLX1	Brain_Cerebellum1	gtex	protein_coding	chr4	858823	858824	en	0.13307	5.63e-08	-3.24	0.0256	0	4:695146-4:1478711
ENSG00000260911	NA	AC135050.3	Brain_Cerebellum1	gtex	lncRNA	chr16	31065429	31065430	en	0.399408	1.05e-24	-4.8	0.0251	0	16:29036613-16:31382470
ENSG00000163749	NA	CCDC158	Brain_Cerebellum1	gtex	protein_coding	chr4	77293065	77293066	en	0.0237436	0.0259066	-3.61	0.0193	0	4:77130707-4:79093979
ENSG00000143590	NA	EFNA3	Brain_Cerebellum1	gtex	protein_coding	chr1	155064570	155064571	en	0.0338304	0.00767853	2.08	0.0165	0	1:154770403-1:156336133
ENSG00000225190	NA	PLEKHM1	Brain_Cerebellum1	gtex	protein_coding	chr17	43671771	43671772	en	0.602922	2.17e-43	8.92	0.0159	0	17:43056905-17:45876022
ENSG00000189157	NA	FAM47E	Brain_Cerebellum1	gtex	protein_coding	chr4	77145751	77145752	en	0.434591	1.96e-27	-3.47	0.0152	0	4:77130707-4:79093979
ENSG00000156219	NA	ART3	Brain_Cerebellum1	gtex	protein_coding	chr4	76982920	76982921	en	0.344486	9.71e-21	-4.07	0.0151	0	4:77130707-4:79093979
ENSG00000226816	NA	AC005082.1	Brain_Cerebellum1	gtex	lncRNA	chr7	23265331	23265332	en	0.10546	1.61e-06	-2.85	0.0147	0	7:22508611-7:23469560
ENSG00000248360	NA	LINC00504	Brain_Cerebellum1	gtex	lncRNA	chr4	14816727	14816728	en	0.0225252	0.0300808	3.29	0.0147	0	4:15147446-4:15926136
ENSG00000119242	NA	CCDC92	Brain_Cerebellum1	gtex	protein_coding	chr12	124435502	124435503	en	0.0724124	8.15e-05	3.13	0.00926	0	12:122009763-12:124976982
ENSG00000179195	NA	ZNF664	Brain_Cerebellum1	gtex	protein_coding	chr12	124476845	124476846	en	0.056406	0.000535036	-3.1	0.00867	0	12:122009763-12:124976982
ENSG00000099365	NA	STX1B	Brain_Cerebellum1	gtex	protein_coding	chr16	31015744	31015745	en	0.113943	5.79e-07	-4.48	0.00851	0	16:29036613-16:31382470
ENSG00000163687	NA	DNASE1L3	Brain_Cerebellum1	gtex	protein_coding	chr3	58196608	58196609	en	0.0214299	0.034426	-2.8	0.00693	0	3:58157850-3:60272829
ENSG00000136243	NA	NUPL2	Brain_Cerebellum1	gtex	protein_coding	chr7	23242812	23242813	en	0.454518	4.67e-29	3.46	0.00662	0	7:22508611-7:23469560
ENSG00000249592	NA	AC139887.2	Brain_Cerebellum1	gtex	lncRNA	chr4	806108	806109	en	0.106145	1.48e-06	1.76	0.00651	0	4:695146-4:1478711
ENSG00000133065	NA	SLC41A1	Brain_Cerebellum1	gtex	protein_coding	chr1	205745259	205745260	en	0.147617	9.3e-09	1.62	0.00556	0	1:204681068-1:205922403
ENSG00000099377	NA	HSD3B7	Brain_Cerebellum1	gtex	protein_coding	chr16	30967687	30967688	en	0.0284162	0.0146924	-2.14	0.00541	0	16:29036613-16:31382470
ENSG00000169241	NA	SLC50A1	Brain_Cerebellum1	gtex	protein_coding	chr1	155120374	155120375	en	0.065279	0.000188693	-2.95	0.00536	0	1:154770403-1:156336133
ENSG00000273493	NA	AC098479.1	Brain_Cerebellum1	gtex	lncRNA	chr3	58350234	58350235	en	0.0269552	0.0175283	2.7	0.00533	0	3:58157850-3:60272829
ENSG00000152128	NA	TMEM163	Brain_Cerebellum1	gtex	protein_coding	chr2	135334324	135334325	en	0.118523	3.32e-07	2.67	0.00509	0	2:135159453-2:137042794
ENSG00000163463	NA	KRTCAP2	Brain_Cerebellum1	gtex	protein_coding	chr1	155141436	155141437	en	0.0543001	0.000685166	2.87	0.00447	0	1:154770403-1:156336133
ENSG00000078081	NA	LAMP3	Brain_Cerebellum1	gtex	protein_coding	chr3	182839240	182839241	en	0.0520102	0.000896672	-2.61	0.00433	0	3:181511166-3:183769683
ENSG00000243368	NA	MCCC1-AS1	Brain_Cerebellum1	gtex	lncRNA	chr3	182777090	182777091	en	0.106105	1.49e-06	-2.14	0.00383	0	3:181511166-3:183769683
ENSG00000082258	NA	CCNT2	Brain_Cerebellum1	gtex	protein_coding	chr2	135701353	135701354	en	0.188379	5.19e-11	-2.56	0.00378	0	2:135159453-2:137042794
ENSG00000250091	NA	DNAH10OS	Brain_Cerebellum1	gtex	lncRNA	chr12	124416628	124416629	en	0.104478	1.81e-06	2.9	0.00365	0	12:122009763-12:124976982
ENSG00000185499	NA	MUC1	Brain_Cerebellum1	gtex	protein_coding	chr1	155150559	155150560	en	0.0808532	3.01e-05	2.73	0.00307	0	1:154770403-1:156336133
ENSG00000184445	NA	KNTC1	Brain_Cerebellum1	gtex	protein_coding	chr12	123062247	123062248	en	0.0615961	0.00029085	-3.29	0.00297	0	12:122009763-12:124976982
ENSG00000181350	NA	LRRC75A	Brain_Cerebellum1	gtex	protein_coding	chr17	16393374	16393375	en	0.0401694	0.00361793	2.89	0.0026	0	17:15020965-17:16411522
ENSG00000078070	NA	MCCC1	Brain_Cerebellum1	gtex	protein_coding	chr3	182801039	182801040	en	0.0516012	0.000940817	-0.921	0.0026	0	3:181511166-3:183769683
ENSG00000103549	NA	RNF40	Brain_Cerebellum1	gtex	protein_coding	chr16	30801496	30801497	en	0.182176	1.16e-10	-3.23	0.00256	0	16:29036613-16:31382470
ENSG00000278133	NA	AC135050.6	Brain_Cerebellum1	gtex	lncRNA	chr16	31106747	31106748	en	0.226758	3.16e-13	4.03	0.00253	0	16:29036613-16:31382470
ENSG00000188906	NA	LRRK2	Brain_Cerebellum1	gtex	protein_coding	chr12	40562234	40562235	en	0.0438044	0.00235518	2.35	0.00233	0	12:39227446-12:40816185
ENSG00000186868	NA	MAPT	Brain_Cerebellum1	gtex	protein_coding	chr17	43996340	43996341	en	0.0684396	0.00013013	6.66	0.00226	0	17:43056905-17:45876022
ENSG00000203805	NA	PLPP4	Brain_Cerebellum1	gtex	protein_coding	chr10	122326512	122326513	en	0.611735	2.11e-44	2.34	0.00226	0	10:120591693-10:122407323
ENSG00000163357	NA	DCST1	Brain_Cerebellum1	gtex	protein_coding	chr1	155028529	155028530	en	0.128063	1.04e-07	-2.24	0.00225	0	1:154770403-1:156336133
ENSG00000235560	NA	AC002310.1	Brain_Cerebellum1	gtex	lncRNA	chr16	30538059	30538060	en	0.0556233	0.000586546	-2.43	0.00218	0	16:29036613-16:31382470
ENSG00000180834	NA	MAP6D1	Brain_Cerebellum1	gtex	protein_coding	chr3	183538310	183538311	en	0.295284	1.87e-17	2.29	0.00204	0	3:181511166-3:183769683
ENSG00000261367	NA	AC012645.2	Brain_Cerebellum1	gtex	lncRNA	chr16	30106071	30106072	en	0.267887	1.02e-15	2.64	0.00197	0	16:29036613-16:31382470
ENSG00000204287	NA	HLA-DRA	Brain_Cerebellum1	gtex	protein_coding	chr6	32506023	32506024	en	0.0502463	0.00110324	2.22	0.0019	0	6:31571337-6:32682664
ENSG00000168291	NA	PDHB	Brain_Cerebellum1	gtex	protein_coding	chr3	58415424	58415425	en	0.214867	1.57e-12	-2.26	0.00189	0	3:58157850-3:60272829
ENSG00000185619	NA	PCGF3	Brain_Cerebellum1	gtex	protein_coding	chr4	741408	741409	en	0.472495	1.43e-30	-1.29	0.0018	0	4:695146-4:1478711
ENSG00000178226	NA	PRSS36	Brain_Cerebellum1	gtex	protein_coding	chr16	31167618	31167619	en	0.419827	2.87e-26	-3.98	0.00157	0	16:29036613-16:31382470
ENSG00000184047	NA	DIABLO	Brain_Cerebellum1	gtex	protein_coding	chr12	122668881	122668882	en	0.0273786	0.016653	1.83	0.00148	0	12:122009763-12:124976982
ENSG00000164181	NA	ELOVL7	Brain_Cerebellum1	gtex	protein_coding	chr5	60098651	60098652	en	0.125562	1.41e-07	2.15	0.00148	0	5:58524622-5:60935451
ENSG00000168297	NA	PXK	Brain_Cerebellum1	gtex	protein_coding	chr3	58342401	58342402	en	0.330821	8.38e-20	-2.04	0.00147	0	3:58157850-3:60272829
ENSG00000196126	NA	HLA-DRB1	Brain_Cerebellum1	gtex	protein_coding	chr6	32540695	32540696	en	0.442385	4.61e-28	2.13	0.00143	0	6:31571337-6:32682664
ENSG00000274461	NA	AC023282.1	Brain_Cerebellum1	gtex	lncRNA	chr10	122423681	122423682	en	0.599749	4.95e-43	2.11	0.00138	0	10:120591693-10:122407323
ENSG00000198825	NA	INPP5F	Brain_Cerebellum1	gtex	protein_coding	chr10	121541862	121541863	en	0.0738412	6.89e-05	-2.08	0.00131	0	10:120591693-10:122407323
ENSG00000204344	NA	STK19	Brain_Cerebellum1	gtex	protein_coding	chr6	31944919	31944920	en	0.305709	3.94e-18	2.04	0.00121	0	6:31571337-6:32682664
ENSG00000178685	NA	PARP10	Brain_Cerebellum1	gtex	protein_coding	chr8	145085338	145085339	en	0.0397646	0.0037954	-2.04	0.00119	0	8:144236881-8:146303788
ENSG00000160803	NA	UBQLN4	Brain_Cerebellum1	gtex	protein_coding	chr1	156014906	156014907	en	0.0410152	0.00327361	2.22	0.00119	0	1:154770403-1:156336133
ENSG00000103472	NA	RRN3P2	Brain_Cerebellum1	gtex	lncRNA	chr16	29136668	29136669	en	0.189044	4.76e-11	1.75	0.00116	0	16:29036613-16:31382470
ENSG00000224043	NA	CCNT2-AS1	Brain_Cerebellum1	gtex	lncRNA	chr2	135309843	135309844	en	0.167405	7.7e-10	2.01	0.00111	0	2:135159453-2:137042794
ENSG00000166582	NA	CENPV	Brain_Cerebellum1	gtex	protein_coding	chr17	16201158	16201159	en	0.324573	2.21e-19	3.15	0.0011	0	17:15020965-17:16411522
ENSG00000138750	NA	NUP54	Brain_Cerebellum1	gtex	protein_coding	chr4	77064102	77064103	en	0.154355	4e-09	-2.89	0.00103	0	4:77130707-4:79093979
ENSG00000204301	NA	NOTCH4	Brain_Cerebellum1	gtex	protein_coding	chr6	32186556	32186557	en	0.268466	9.37e-16	-1.96	0.00101	0	6:31571337-6:32682664
ENSG00000163354	NA	DCST2	Brain_Cerebellum1	gtex	protein_coding	chr1	154993773	154993774	en	0.362415	5.37e-22	-1.75	0.001	0	1:154770403-1:156336133
ENSG00000204348	NA	DXO	Brain_Cerebellum1	gtex	protein_coding	chr6	31934915	31934916	en	0.150485	6.5e-09	1.92	0.001	0	6:31571337-6:32682664
ENSG00000233002	NA	AC005324.1	Brain_Cerebellum1	gtex	lncRNA	chr17	15625467	15625468	en	0.0947671	5.78e-06	-1.51	0.000997	0	17:15020965-17:16411522
ENSG00000164548	NA	TRA2A	Brain_Cerebellum1	gtex	protein_coding	chr7	23468292	23468293	en	0.048733	0.00131812	2.25	0.000989	0	7:22508611-7:23469560
ENSG00000035499	NA	DEPDC1B	Brain_Cerebellum1	gtex	protein_coding	chr5	59923752	59923753	en	0.150271	6.68e-09	-1.94	0.000987	0	5:58524622-5:60935451
ENSG00000180035	NA	ZNF48	Brain_Cerebellum1	gtex	protein_coding	chr16	30366566	30366567	en	0.0328135	0.00866927	1.38	0.00095	0	16:29036613-16:31382470
ENSG00000138768	NA	USO1	Brain_Cerebellum1	gtex	protein_coding	chr4	76723929	76723930	en	0.0951145	5.54e-06	-1.53	0.000931	0	4:77130707-4:79093979
ENSG00000165672	NA	PRDX3	Brain_Cerebellum1	gtex	protein_coding	chr10	120963876	120963877	en	0.023161	0.0278223	1.91	0.000925	0	10:120591693-10:122407323
ENSG00000153086	NA	ACMSD	Brain_Cerebellum1	gtex	protein_coding	chr2	135234666	135234667	en	0.0524897	0.000847547	1.91	0.000919	0	2:135159453-2:137042794
ENSG00000204351	NA	SKIV2L	Brain_Cerebellum1	gtex	protein_coding	chr6	32020442	32020443	en	0.418546	3.61e-26	1.84	0.000918	0	6:31571337-6:32682664
ENSG00000099385	NA	BCL7C	Brain_Cerebellum1	gtex	protein_coding	chr16	30718610	30718611	en	0.0260949	0.0194545	-3.42	0.000913	0	16:29036613-16:31382470
ENSG00000185947	NA	ZNF267	Brain_Cerebellum1	gtex	protein_coding	chr16	31907610	31907611	en	0.029347	0.0131345	2.72	0.000912	0	16:29036613-16:31382470
ENSG00000227165	NA	WDR11-AS1	Brain_Cerebellum1	gtex	lncRNA	chr10	122750460	122750461	en	0.379675	3.07e-23	1.88	0.000879	0	10:120591693-10:122407323
ENSG00000169592	NA	INO80E	Brain_Cerebellum1	gtex	protein_coding	chr16	30012186	30012187	en	0.321665	3.47e-19	-1.71	0.000861	0	16:29036613-16:31382470
ENSG00000270361	NA	AL451085.1	Brain_Cerebellum1	gtex	lncRNA	chr1	154908927	154908928	en	0.0430873	0.00256307	-1.74	0.000856	0	1:154770403-1:156336133
ENSG00000163689	NA	C3orf67	Brain_Cerebellum1	gtex	protein_coding	chr3	58892120	58892121	en	0.0638406	0.00022344	-1.84	0.00084	0	3:58157850-3:60272829
ENSG00000141279	NA	NPEPPS	Brain_Cerebellum1	gtex	protein_coding	chr17	45641638	45641639	en	0.118799	3.21e-07	0.308	0.000839	0	17:43056905-17:45876022
ENSG00000177234	NA	LINC01561	Brain_Cerebellum1	gtex	lncRNA	chr10	122362719	122362720	en	0.637883	1.52e-47	1.85	0.000838	0	10:120591693-10:122407323
ENSG00000176681	NA	LRRC37A	Brain_Cerebellum1	gtex	protein_coding	chr17	44373721	44373722	en	0.639676	9.06e-48	-8.52	0.000832	0	17:43056905-17:45876022
ENSG00000179344	NA	HLA-DQB1	Brain_Cerebellum1	gtex	protein_coding	chr6	32636116	32636117	en	0.575513	2.22e-40	1.85	0.000831	0	6:31571337-6:32682664
ENSG00000197653	NA	DNAH10	Brain_Cerebellum1	gtex	protein_coding	chr12	124366881	124366882	en	0.0785157	3.97e-05	1.97	0.000828	0	12:122009763-12:124976982
ENSG00000174529	NA	TMEM81	Brain_Cerebellum1	gtex	protein_coding	chr1	205049626	205049627	en	0.200524	1.06e-11	1.83	0.000812	0	1:204681068-1:205922403
ENSG00000178209	NA	PLEC	Brain_Cerebellum1	gtex	protein_coding	chr8	145019072	145019073	en	0.374058	7.85e-23	-1.82	0.000793	0	8:144236881-8:146303788
ENSG00000151229	NA	SLC2A13	Brain_Cerebellum1	gtex	protein_coding	chr12	40327964	40327965	en	0.0377852	0.00479822	1.8	0.000758	0	12:39227446-12:40816185
ENSG00000160685	NA	ZBTB7B	Brain_Cerebellum1	gtex	protein_coding	chr1	154933591	154933592	en	0.024798	0.0227776	1.65	0.000753	0	1:154770403-1:156336133
ENSG00000225914	NA	TSBP1-AS1	Brain_Cerebellum1	gtex	lncRNA	chr6	32299941	32299942	en	0.170841	4.97e-10	1.78	0.00075	0	6:31571337-6:32682664
ENSG00000204290	NA	BTNL2	Brain_Cerebellum1	gtex	protein_coding	chr6	32356363	32356364	en	0.16821	6.95e-10	1.71	0.000716	0	6:31571337-6:32682664
ENSG00000254645	NA	AC087379.1	Brain_Cerebellum1	gtex	lncRNA	chr11	15753033	15753034	en	0.0461517	0.00178605	-1.76	0.00071	0	11:13373433-11:15742397
ENSG00000242686	NA	AC107464.1	Brain_Cerebellum1	gtex	lncRNA	chr4	655188	655189	en	0.369942	1.56e-22	1.14	0.00067	0	4:695146-4:1478711
ENSG00000274682	NA	AC015540.1	Brain_Cerebellum1	gtex	lncRNA	chr12	41370850	41370851	en	0.0282344	0.0150181	-1.72	0.000661	0	12:40816185-12:41658193
ENSG00000118804	NA	STBD1	Brain_Cerebellum1	gtex	protein_coding	chr4	77206491	77206492	en	0.169312	6.04e-10	0.00567	0.000637	0	4:77130707-4:79093979
ENSG00000162873	NA	KLHDC8A	Brain_Cerebellum1	gtex	protein_coding	chr1	205326570	205326571	en	0.282791	1.18e-16	1.77	0.000629	0	1:204681068-1:205922403
ENSG00000184144	NA	CNTN2	Brain_Cerebellum1	gtex	protein_coding	chr1	205019148	205019149	en	0.299497	1e-17	1.91	0.000624	0	1:204681068-1:205922403
ENSG00000079616	NA	KIF22	Brain_Cerebellum1	gtex	protein_coding	chr16	29831634	29831635	en	0.0296178	0.0127136	1.73	0.000621	0	16:29036613-16:31382470
ENSG00000215375	NA	MYL5	Brain_Cerebellum1	gtex	protein_coding	chr4	684248	684249	en	0.0358076	0.00606809	2.65	0.000617	0	4:695146-4:1478711
ENSG00000259807	NA	AC009093.1	Brain_Cerebellum1	gtex	lncRNA	chr16	29198586	29198587	en	0.0582335	0.000431697	1.38	0.000615	0	16:29036613-16:31382470
ENSG00000139697	NA	SBNO1	Brain_Cerebellum1	gtex	protein_coding	chr12	123773315	123773316	en	0.042388	0.0027836	-0.932	0.000604	0	12:122009763-12:124976982
ENSG00000204498	NA	NFKBIL1	Brain_Cerebellum1	gtex	protein_coding	chr6	31511274	31511275	en	0.0760781	5.29e-05	-1.64	0.000599	0	6:31571337-6:32682664
ENSG00000127415	NA	IDUA	Brain_Cerebellum1	gtex	protein_coding	chr4	995834	995835	en	0.173568	3.51e-10	-2.55	0.000598	0	4:695146-4:1478711
ENSG00000175727	NA	MLXIP	Brain_Cerebellum1	gtex	protein_coding	chr12	122550540	122550541	en	0.0560195	0.000559877	-1.47	0.000591	0	12:122009763-12:124976982
ENSG00000204308	NA	RNF5	Brain_Cerebellum1	gtex	protein_coding	chr6	32154390	32154391	en	0.252814	8.63e-15	-1.62	0.000582	0	6:31571337-6:32682664
ENSG00000120008	NA	WDR11	Brain_Cerebellum1	gtex	protein_coding	chr10	122451970	122451971	en	0.493818	1.95e-32	1.63	0.000574	0	10:120591693-10:122407323
ENSG00000168477	NA	TNXB	Brain_Cerebellum1	gtex	protein_coding	chr6	32046638	32046639	en	0.0820666	2.61e-05	1.58	0.000569	0	6:31571337-6:32682664
ENSG00000178882	NA	RFLNA	Brain_Cerebellum1	gtex	protein_coding	chr12	124741784	124741785	en	0.0439973	0.00230222	-1.22	0.000564	0	12:122009763-12:124976982
ENSG00000183605	NA	SFXN4	Brain_Cerebellum1	gtex	protein_coding	chr10	120924167	120924168	en	0.641987	4.65e-48	1.61	0.000559	0	10:120591693-10:122407323
ENSG00000273133	NA	AC116651.1	Brain_Cerebellum1	gtex	lncRNA	chr4	15599748	15599749	en	0.256618	5.05e-15	-1.49	0.000542	0	4:15147446-4:15926136
ENSG00000125459	NA	MSTO1	Brain_Cerebellum1	gtex	protein_coding	chr1	155587034	155587035	en	0.232345	1.47e-13	0.343	0.000542	0	1:154770403-1:156336133
ENSG00000163686	NA	ABHD6	Brain_Cerebellum1	gtex	protein_coding	chr3	58249803	58249804	en	0.109727	9.63e-07	-1.52	0.000539	0	3:58157850-3:60272829
ENSG00000174938	NA	SEZ6L2	Brain_Cerebellum1	gtex	protein_coding	chr16	29888330	29888331	en	0.07958	3.5e-05	-0.95	0.000527	0	16:29036613-16:31382470
ENSG00000181085	NA	MAPK15	Brain_Cerebellum1	gtex	protein_coding	chr8	144792606	144792607	en	0.0249326	0.0224071	1.54	0.000502	0	8:144236881-8:146303788
ENSG00000143622	NA	RIT1	Brain_Cerebellum1	gtex	protein_coding	chr1	155905031	155905032	en	0.123667	1.78e-07	1.73	0.000501	0	1:154770403-1:156336133
ENSG00000274292	NA	AC084018.2	Brain_Cerebellum1	gtex	lncRNA	chr12	122210350	122210351	en	0.307722	2.91e-18	-1.46	0.000491	0	12:122009763-12:124976982
ENSG00000178722	NA	C5orf64	Brain_Cerebellum1	gtex	lncRNA	chr5	61007868	61007869	en	0.217684	1.08e-12	1.53	0.000489	0	5:58524622-5:60935451
ENSG00000272182	NA	AC135507.1	Brain_Cerebellum1	gtex	lncRNA	chr3	58328459	58328460	en	0.0756927	5.54e-05	-1.5	0.000488	0	3:58157850-3:60272829
ENSG00000233799	NA	AC139887.1	Brain_Cerebellum1	gtex	lncRNA	chr4	759274	759275	en	0.0410517	0.00325952	0.563	0.000482	0	4:695146-4:1478711
ENSG00000111364	NA	DDX55	Brain_Cerebellum1	gtex	protein_coding	chr12	124096620	124096621	en	0.367418	2.36e-22	-0.397	0.000481	0	12:122009763-12:124976982
ENSG00000174514	NA	MFSD4A	Brain_Cerebellum1	gtex	protein_coding	chr1	205521295	205521296	en	0.0283205	0.0148629	1.91	0.000481	0	1:204681068-1:205922403
ENSG00000239381	NA	AC125613.1	Brain_Cerebellum1	gtex	lncRNA	chr3	181349985	181349986	en	0.0831082	2.31e-05	1.51	0.00048	0	3:181511166-3:183769683
ENSG00000276855	NA	AC015922.3	Brain_Cerebellum1	gtex	lncRNA	chr17	15698919	15698920	en	0.211343	2.52e-12	-1.94	0.000477	0	17:15020965-17:16411522
ENSG00000069275	NA	NUCKS1	Brain_Cerebellum1	gtex	protein_coding	chr1	205701100	205701101	en	0.0597111	0.000362927	-3.66	0.000475	0	1:204681068-1:205922403
ENSG00000102882	NA	MAPK3	Brain_Cerebellum1	gtex	protein_coding	chr16	30155307	30155308	en	0.123553	1.8e-07	-0.775	0.000471	0	16:29036613-16:31382470
ENSG00000196683	NA	TOMM7	Brain_Cerebellum1	gtex	protein_coding	chr7	22849326	22849327	en	0.458265	2.28e-29	1.89	0.000452	0	7:22508611-7:23469560
ENSG00000169957	NA	ZNF768	Brain_Cerebellum1	gtex	protein_coding	chr16	30522245	30522246	en	0.0797995	3.41e-05	-2.58	0.000452	0	16:29036613-16:31382470
ENSG00000139725	NA	RHOF	Brain_Cerebellum1	gtex	protein_coding	chr12	122210664	122210665	en	0.115273	4.93e-07	-1.39	0.000448	0	12:122009763-12:124976982
ENSG00000052344	NA	PRSS8	Brain_Cerebellum1	gtex	protein_coding	chr16	31137118	31137119	en	0.0673381	0.000148125	2.06	0.000444	0	16:29036613-16:31382470
ENSG00000280789	NA	PAGR1	Brain_Cerebellum1	gtex	protein_coding	chr16	29883889	29883890	en	0.0722757	8.29e-05	-0.666	0.00044	0	16:29036613-16:31382470
ENSG00000169231	NA	THBS3	Brain_Cerebellum1	gtex	protein_coding	chr1	155183004	155183005	en	0.256857	4.88e-15	-1.53	0.000436	0	1:154770403-1:156336133
ENSG00000278811	NA	LINC00624	Brain_Cerebellum1	gtex	lncRNA	chr1	146865960	146865961	en	0.484889	1.2e-31	1.44	0.00043	0	1:144977648-1:148360712
ENSG00000244731	NA	C4A	Brain_Cerebellum1	gtex	protein_coding	chr6	31946761	31946762	en	0.469987	2.34e-30	-1.43	0.000428	0	6:31571337-6:32682664
ENSG00000133069	NA	TMCC2	Brain_Cerebellum1	gtex	protein_coding	chr1	205238783	205238784	en	0.284662	8.98e-17	1.19	0.000413	0	1:204681068-1:205922403
ENSG00000151929	NA	BAG3	Brain_Cerebellum1	gtex	protein_coding	chr10	121582006	121582007	en	0.0963182	4.8e-06	-1.4	0.000409	0	10:120591693-10:122407323
ENSG00000145217	NA	SLC26A1	Brain_Cerebellum1	gtex	protein_coding	chr4	946251	946252	en	0.509919	6.77e-34	3.33	0.000407	0	4:695146-4:1478711
ENSG00000277494	NA	GPIHBP1	Brain_Cerebellum1	gtex	protein_coding	chr8	144288793	144288794	en	0.270997	6.52e-16	1.39	0.000404	0	8:144236881-8:146303788
ENSG00000102886	NA	GDPD3	Brain_Cerebellum1	gtex	protein_coding	chr16	29999235	29999236	en	0.322144	3.22e-19	-1.39	0.0004	0	16:29036613-16:31382470
ENSG00000103496	NA	STX4	Brain_Cerebellum1	gtex	protein_coding	chr16	31075134	31075135	en	0.124375	1.63e-07	-0.981	0.0004	0	16:29036613-16:31382470
ENSG00000173080	NA	RXFP4	Brain_Cerebellum1	gtex	protein_coding	chr1	155942495	155942496	en	0.0391084	0.00410194	-1.41	0.000395	0	1:154770403-1:156336133
ENSG00000272849	NA	AC084018.1	Brain_Cerebellum1	gtex	lncRNA	chr12	122260285	122260286	en	0.278922	2.07e-16	-1.26	0.000394	0	12:122009763-12:124976982
ENSG00000183715	NA	OPCML	Brain_Cerebellum1	gtex	protein_coding	chr11	132903058	132903059	en	0.182347	1.14e-10	-1.1	0.000392	0	11:133000260-11:134205993
ENSG00000168301	NA	KCTD6	Brain_Cerebellum1	gtex	protein_coding	chr3	58943643	58943644	en	0.108033	1.18e-06	-1.35	0.000389	0	3:58157850-3:60272829
ENSG00000143603	NA	KCNN3	Brain_Cerebellum1	gtex	protein_coding	chr1	154864554	154864555	en	0.0766456	4.95e-05	-1.33	0.000388	0	1:154770403-1:156336133
ENSG00000169955	NA	ZNF747	Brain_Cerebellum1	gtex	protein_coding	chr16	30547818	30547819	en	0.0467506	0.00166444	-2.39	0.000386	0	16:29036613-16:31382470
ENSG00000116604	NA	MEF2D	Brain_Cerebellum1	gtex	protein_coding	chr1	156416636	156416637	en	0.0307624	0.0110811	1.05	0.000384	0	1:154770403-1:156336133
ENSG00000163545	NA	NUAK2	Brain_Cerebellum1	gtex	protein_coding	chr1	205297359	205297360	en	0.121941	2.19e-07	1.44	0.000384	0	1:204681068-1:205922403
ENSG00000156885	NA	COX6A2	Brain_Cerebellum1	gtex	protein_coding	chr16	31045824	31045825	en	0.0731457	7.48e-05	-1.91	0.000382	0	16:29036613-16:31382470
ENSG00000167371	NA	PRRT2	Brain_Cerebellum1	gtex	protein_coding	chr16	29863268	29863269	en	0.141483	1.99e-08	-0.556	0.000382	0	16:29036613-16:31382470
ENSG00000251575	NA	C5orf64-AS1	Brain_Cerebellum1	gtex	lncRNA	chr5	61007238	61007239	en	0.0348905	0.00676755	-1.35	0.000381	0	5:58524622-5:60935451
ENSG00000250616	NA	AC012645.1	Brain_Cerebellum1	gtex	lncRNA	chr16	29811433	29811434	en	0.0227873	0.0291277	1.36	0.000378	0	16:29036613-16:31382470
ENSG00000138759	NA	FRAS1	Brain_Cerebellum1	gtex	protein_coding	chr4	78987075	78987076	en	0.0304445	0.0115119	-0.87	0.000378	0	4:77130707-4:79093979
ENSG00000141295	NA	SCRN2	Brain_Cerebellum1	gtex	protein_coding	chr17	45903412	45903413	en	0.386009	1.05e-23	0.369	0.000377	0	17:43056905-17:45876022
ENSG00000183336	NA	BOLA2	Brain_Cerebellum1	gtex	protein_coding	chr16	29749535	29749536	en	0.134037	4.99e-08	0.522	0.000375	0	16:29036613-16:31382470
ENSG00000177628	NA	GBA	Brain_Cerebellum1	gtex	protein_coding	chr1	155198574	155198575	en	0.0546024	0.000661263	0.698	0.000373	0	1:154770403-1:156336133
ENSG00000139714	NA	MORN3	Brain_Cerebellum1	gtex	protein_coding	chr12	122079037	122079038	en	0.28779	5.67e-17	0.967	0.000368	0	12:122009763-12:124976982
ENSG00000116584	NA	ARHGEF2	Brain_Cerebellum1	gtex	protein_coding	chr1	156346809	156346810	en	0.0229614	0.0285119	-1.1	0.000365	0	1:154770403-1:156336133
ENSG00000172992	NA	DCAKD	Brain_Cerebellum1	gtex	protein_coding	chr17	43120604	43120605	en	0.373197	9.06e-23	-2.41	0.000364	0	17:43056905-17:45876022
ENSG00000163872	NA	YEATS2	Brain_Cerebellum1	gtex	protein_coding	chr3	183480014	183480015	en	0.112136	7.2e-07	1.31	0.000364	0	3:181511166-3:183769683
ENSG00000204366	NA	ZBTB12	Brain_Cerebellum1	gtex	protein_coding	chr6	31834203	31834204	en	0.0227021	0.0294339	1.28	0.000361	0	6:31571337-6:32682664
ENSG00000027644	NA	INSRR	Brain_Cerebellum1	gtex	protein_coding	chr1	156885944	156885945	en	0.0298985	0.0122918	1.11	0.00036	0	1:154770403-1:156336133
ENSG00000181135	NA	ZNF707	Brain_Cerebellum1	gtex	protein_coding	chr8	144794539	144794540	en	0.0246011	0.0233309	-1.3	0.000358	0	8:144236881-8:146303788
ENSG00000237541	NA	HLA-DQA2	Brain_Cerebellum1	gtex	protein_coding	chr6	32613597	32613598	en	0.403181	5.46e-25	-1.16	0.000351	0	6:31571337-6:32682664
ENSG00000187607	NA	ZNF286A	Brain_Cerebellum1	gtex	protein_coding	chr17	15484252	15484253	en	0.167717	7.4e-10	0.908	0.000351	0	17:15020965-17:16411522
ENSG00000251417	NA	AC145285.2	Brain_Cerebellum1	gtex	lncRNA	chr16	28798006	28798007	en	0.15361	4.4e-09	-0.845	0.000346	0	16:29036613-16:31382470
ENSG00000206337	NA	HCP5	Brain_Cerebellum1	gtex	lncRNA	chr6	31569995	31569996	en	0.0804524	3.16e-05	-1.24	0.000345	0	6:31571337-6:32682664
ENSG00000265519	NA	AC015922.2	Brain_Cerebellum1	gtex	lncRNA	chr17	15665894	15665895	en	0.040898	0.00331926	-1.12	0.000341	0	17:15020965-17:16411522
ENSG00000162836	NA	ACP6	Brain_Cerebellum1	gtex	protein_coding	chr1	146958571	146958572	en	0.317429	6.65e-19	1.26	0.000339	0	1:144977648-1:148360712
ENSG00000118816	NA	CCNI	Brain_Cerebellum1	gtex	protein_coding	chr4	77977938	77977939	en	0.030512	0.011419	1.05	0.000338	0	4:77130707-4:79093979
ENSG00000212694	NA	LINC01089	Brain_Cerebellum1	gtex	lncRNA	chr12	122276664	122276665	en	0.245397	2.43e-14	-1.13	0.000338	0	12:122009763-12:124976982
ENSG00000204310	NA	AGPAT1	Brain_Cerebellum1	gtex	protein_coding	chr6	32136867	32136868	en	0.0567789	0.000512112	1.24	0.000337	0	6:31571337-6:32682664
ENSG00000006062	NA	MAP3K14	Brain_Cerebellum1	gtex	protein_coding	chr17	43374961	43374962	en	0.161202	1.69e-09	7.33	0.000336	0	17:43056905-17:45876022
ENSG00000176723	NA	ZNF843	Brain_Cerebellum1	gtex	protein_coding	chr16	31428606	31428607	en	0.322784	2.92e-19	-1.11	0.000334	0	16:29036613-16:31382470
ENSG00000143850	NA	PLEKHA6	Brain_Cerebellum1	gtex	protein_coding	chr1	204078790	204078791	en	0.140922	2.14e-08	1.02	0.00033	0	1:204681068-1:205922403
ENSG00000221926	NA	TRIM16	Brain_Cerebellum1	gtex	protein_coding	chr17	15559970	15559971	en	0.0663537	0.000166301	-0.679	0.00033	0	17:15020965-17:16411522
ENSG00000263528	NA	IKBKE	Brain_Cerebellum1	gtex	protein_coding	chr1	206493074	206493075	en	0.125254	1.46e-07	2.14	0.000329	0	1:204681068-1:205922403
ENSG00000160957	NA	RECQL4	Brain_Cerebellum1	gtex	protein_coding	chr8	145738753	145738754	en	0.122393	2.08e-07	-1.22	0.000327	0	8:144236881-8:146303788
ENSG00000184209	NA	SNRNP35	Brain_Cerebellum1	gtex	protein_coding	chr12	123988290	123988291	en	0.0197015	0.0426555	0.226	0.000327	0	12:122009763-12:124976982
ENSG00000158113	NA	LRRC43	Brain_Cerebellum1	gtex	protein_coding	chr12	122708022	122708023	en	0.156886	2.91e-09	0.586	0.000324	0	12:122009763-12:124976982
ENSG00000114796	NA	KLHL24	Brain_Cerebellum1	gtex	protein_coding	chr3	183371163	183371164	en	0.0884078	1.23e-05	-1.21	0.00032	0	3:181511166-3:183769683
ENSG00000117222	NA	RBBP5	Brain_Cerebellum1	gtex	protein_coding	chr1	205051989	205051990	en	0.11751	3.76e-07	0.999	0.00032	0	1:204681068-1:205922403
ENSG00000139722	NA	VPS37B	Brain_Cerebellum1	gtex	protein_coding	chr12	123345262	123345263	en	0.065304	0.000188139	-1.76	0.00032	0	12:122009763-12:124976982
ENSG00000141294	NA	LRRC46	Brain_Cerebellum1	gtex	protein_coding	chr17	45898416	45898417	en	0.420668	2.46e-26	2.35	0.000316	0	17:43056905-17:45876022
ENSG00000176383	NA	B3GNT4	Brain_Cerebellum1	gtex	protein_coding	chr12	122704188	122704189	en	0.0379312	0.00471586	-1.49	0.000311	0	12:122009763-12:124976982
ENSG00000136448	NA	NMT1	Brain_Cerebellum1	gtex	protein_coding	chr17	43158413	43158414	en	0.15359	4.41e-09	2.32	0.000311	0	17:43056905-17:45876022
ENSG00000005844	NA	ITGAL	Brain_Cerebellum1	gtex	protein_coding	chr16	30497676	30497677	en	0.0483796	0.00137407	0.161	0.000309	0	16:29036613-16:31382470
ENSG00000051825	NA	MPHOSPH9	Brain_Cerebellum1	gtex	protein_coding	chr12	123677028	123677029	en	0.04951	0.00120301	-2.01	0.000309	0	12:122009763-12:124976982
ENSG00000179918	NA	SEPHS2	Brain_Cerebellum1	gtex	protein_coding	chr16	30482795	30482796	en	0.0187396	0.0481006	0.644	0.000307	0	16:29036613-16:31382470
ENSG00000179085	NA	DPM3	Brain_Cerebellum1	gtex	protein_coding	chr1	155105792	155105793	en	0.0185787	0.0490803	1.1	0.000305	0	1:154770403-1:156336133
ENSG00000053524	NA	MCF2L2	Brain_Cerebellum1	gtex	protein_coding	chr3	183022303	183022304	en	0.0543837	0.000678472	1.16	0.000304	0	3:181511166-3:183769683
ENSG00000103502	NA	CDIPT	Brain_Cerebellum1	gtex	protein_coding	chr16	29874616	29874617	en	0.325567	1.9e-19	-0.242	0.000302	0	16:29036613-16:31382470
ENSG00000237188	NA	AC242426.2	Brain_Cerebellum1	gtex	lncRNA	chr1	146686580	146686581	en	0.0416871	0.00302377	1.15	0.0003	0	1:144977648-1:148360712
ENSG00000180900	NA	SCRIB	Brain_Cerebellum1	gtex	protein_coding	chr8	144889401	144889402	en	0.0586757	0.00040985	1.15	0.0003	0	8:144236881-8:146303788
ENSG00000161016	NA	RPL8	Brain_Cerebellum1	gtex	protein_coding	chr8	146014113	146014114	en	0.473691	1.13e-30	-1.14	0.000299	0	8:144236881-8:146303788
ENSG00000169900	NA	PYDC1	Brain_Cerebellum1	gtex	protein_coding	chr16	31170444	31170445	en	0.0355533	0.00625437	-2.09	0.000297	0	16:29036613-16:31382470
ENSG00000152253	NA	SPC25	Brain_Cerebellum1	gtex	protein_coding	chr2	169725037	169725038	en	0.118929	3.16e-07	1.15	0.000297	0	2:167356254-2:169968112
ENSG00000181625	NA	SLX1B	Brain_Cerebellum1	gtex	protein_coding	chr16	29751351	29751352	en	0.167391	7.72e-10	0.469	0.000295	0	16:29036613-16:31382470
ENSG00000185803	NA	SLC52A2	Brain_Cerebellum1	gtex	protein_coding	chr8	145594181	145594182	en	0.0969046	4.48e-06	-1.12	0.000293	0	8:144236881-8:146303788
ENSG00000225855	NA	RUSC1-AS1	Brain_Cerebellum1	gtex	lncRNA	chr1	155335325	155335326	en	0.168144	7.01e-10	-0.406	0.000291	0	1:154770403-1:156336133
ENSG00000159111	NA	MRPL10	Brain_Cerebellum1	gtex	protein_coding	chr17	45874031	45874032	en	0.560041	9.14e-39	1.54	0.000289	0	17:43056905-17:45876022
ENSG00000189283	NA	FHIT	Brain_Cerebellum1	gtex	protein_coding	chr3	60718808	60718809	en	0.0294083	0.013038	1.08	0.000288	0	3:58157850-3:60272829
ENSG00000260304	NA	AC009088.2	Brain_Cerebellum1	gtex	lncRNA	chr16	31217869	31217870	en	0.256969	4.81e-15	2.21	0.000287	0	16:29036613-16:31382470
ENSG00000111325	NA	OGFOD2	Brain_Cerebellum1	gtex	protein_coding	chr12	123584629	123584630	en	0.0196577	0.0428892	-1.87	0.000285	0	12:122009763-12:124976982
ENSG00000254648	NA	AP000911.1	Brain_Cerebellum1	gtex	lncRNA	chr11	133868074	133868075	en	0.123391	1.84e-07	-0.553	0.000283	0	11:133000260-11:134205993
ENSG00000231852	NA	CYP21A2	Brain_Cerebellum1	gtex	protein_coding	chr6	32010805	32010806	en	0.438599	9.32e-28	-1.08	0.000283	0	6:31571337-6:32682664
ENSG00000267288	NA	AC138150.2	Brain_Cerebellum1	gtex	lncRNA	chr17	43265066	43265067	en	0.0739497	6.8e-05	-1.88	0.000282	0	17:43056905-17:45876022
ENSG00000048342	NA	CC2D2A	Brain_Cerebellum1	gtex	protein_coding	chr4	15506395	15506396	en	0.0250143	0.0221852	0.906	0.000282	0	4:15147446-4:15926136
ENSG00000186104	NA	CYP2R1	Brain_Cerebellum1	gtex	protein_coding	chr11	14860907	14860908	en	0.0469405	0.00162763	-1.1	0.000282	0	11:13373433-11:15742397
ENSG00000143630	NA	HCN3	Brain_Cerebellum1	gtex	protein_coding	chr1	155272274	155272275	en	0.0689669	0.000122303	1.01	0.000281	0	1:154770403-1:156336133
ENSG00000078579	NA	FGF20	Brain_Cerebellum1	gtex	protein_coding	chr8	16847913	16847914	en	0.0258122	0.0201336	-1.09	0.000279	0	8:15991660-8:17387624
ENSG00000134283	NA	PPHLN1	Brain_Cerebellum1	gtex	protein_coding	chr12	42502216	42502217	en	0.204339	6.4e-12	-1.09	0.000278	0	12:40816185-12:41658193
ENSG00000180096	NA	SEPTIN1	Brain_Cerebellum1	gtex	protein_coding	chr16	30395467	30395468	en	0.102129	2.4e-06	-0.354	0.000278	0	16:29036613-16:31382470
ENSG00000166105	NA	GLB1L3	Brain_Cerebellum1	gtex	protein_coding	chr11	134168514	134168515	en	0.316732	7.39e-19	0.503	0.000277	0	11:133000260-11:134205993
ENSG00000152127	NA	MGAT5	Brain_Cerebellum1	gtex	protein_coding	chr2	135040531	135040532	en	0.0846244	1.93e-05	1.08	0.000276	0	2:135159453-2:137042794
ENSG00000114770	NA	ABCC5	Brain_Cerebellum1	gtex	protein_coding	chr3	183657844	183657845	en	0.32925	1.07e-19	1.07	0.000275	0	3:181511166-3:183769683
ENSG00000204241	NA	LINC02731	Brain_Cerebellum1	gtex	lncRNA	chr11	133917037	133917038	en	0.127545	1.11e-07	0.7	0.000275	0	11:133000260-11:134205993
ENSG00000090238	NA	YPEL3	Brain_Cerebellum1	gtex	protein_coding	chr16	30089316	30089317	en	0.403076	5.56e-25	-1.13	0.000275	0	16:29036613-16:31382470
ENSG00000150967	NA	ABCB9	Brain_Cerebellum1	gtex	protein_coding	chr12	123440340	123440341	en	0.0808932	3e-05	-1.94	0.000273	0	12:122009763-12:124976982
ENSG00000281406	NA	BLACAT1	Brain_Cerebellum1	gtex	protein_coding	chr1	205407150	205407151	en	0.211881	2.35e-12	-0.784	0.000273	0	1:204681068-1:205922403
ENSG00000139726	NA	DENR	Brain_Cerebellum1	gtex	protein_coding	chr12	123240166	123240167	en	0.0269452	0.0175495	1.12	0.000273	0	12:122009763-12:124976982
ENSG00000140678	NA	ITGAX	Brain_Cerebellum1	gtex	protein_coding	chr16	31326472	31326473	en	0.0194416	0.0440604	1.86	0.000273	0	16:29036613-16:31382470
ENSG00000133030	NA	MPRIP	Brain_Cerebellum1	gtex	protein_coding	chr17	17055897	17055898	en	0.0706119	0.00010078	-1.47	0.000273	0	17:15020965-17:16411522
ENSG00000260517	NA	AC009093.2	Brain_Cerebellum1	gtex	lncRNA	chr16	29154153	29154154	en	0.0291836	0.0133952	-0.661	0.000269	0	16:29036613-16:31382470
ENSG00000264589	NA	MAPT-AS1	Brain_Cerebellum1	gtex	lncRNA	chr17	43926048	43926049	en	0.0574756	0.000471879	8.02	0.000268	0	17:43056905-17:45876022
ENSG00000196189	NA	SEMA4A	Brain_Cerebellum1	gtex	protein_coding	chr1	156172311	156172312	en	0.169685	5.76e-10	-0.863	0.000268	0	1:154770403-1:156336133
ENSG00000170619	NA	COMMD5	Brain_Cerebellum1	gtex	protein_coding	chr8	146087229	146087230	en	0.160612	1.82e-09	-1.02	0.000264	0	8:144236881-8:146303788
ENSG00000276045	NA	ORAI1	Brain_Cerebellum1	gtex	protein_coding	chr12	122079929	122079930	en	0.023242	0.0275475	-0.86	0.000264	0	12:122009763-12:124976982
ENSG00000131791	NA	PRKAB2	Brain_Cerebellum1	gtex	protein_coding	chr1	146618907	146618908	en	0.143911	1.47e-08	-1.04	0.000264	0	1:144977648-1:148360712
ENSG00000080603	NA	SRCAP	Brain_Cerebellum1	gtex	protein_coding	chr16	30787247	30787248	en	0.0272134	0.0169891	-1.13	0.000264	0	16:29036613-16:31382470
ENSG00000147789	NA	ZNF7	Brain_Cerebellum1	gtex	protein_coding	chr8	146053889	146053890	en	0.0348021	0.00683909	-1.02	0.000264	0	8:144236881-8:146303788
ENSG00000278112	NA	AC145423.3	Brain_Cerebellum1	gtex	lncRNA	chr12	123993312	123993313	en	0.0390471	0.00413182	-0.179	0.000263	0	12:122009763-12:124976982
ENSG00000196378	NA	ZNF34	Brain_Cerebellum1	gtex	protein_coding	chr8	146007398	146007399	en	0.283541	1.06e-16	1.02	0.000263	0	8:144236881-8:146303788
ENSG00000180209	NA	MYLPF	Brain_Cerebellum1	gtex	protein_coding	chr16	30398955	30398956	en	0.0302712	0.0117539	1.38	0.000261	0	16:29036613-16:31382470
ENSG00000122591	NA	FAM126A	Brain_Cerebellum1	gtex	protein_coding	chr7	22989446	22989447	en	0.127153	1.16e-07	-1.11	0.00026	0	7:22508611-7:23469560
ENSG00000089094	NA	KDM2B	Brain_Cerebellum1	gtex	protein_coding	chr12	121983957	121983958	en	0.0743636	6.48e-05	0.903	0.00026	0	12:122009763-12:124976982
ENSG00000163468	NA	CCT3	Brain_Cerebellum1	gtex	protein_coding	chr1	156298258	156298259	en	0.314511	1.04e-18	-0.749	0.000259	0	1:154770403-1:156336133
ENSG00000139719	NA	VPS33A	Brain_Cerebellum1	gtex	protein_coding	chr12	122728663	122728664	en	0.16621	8.97e-10	-1.05	0.000258	0	12:122009763-12:124976982
ENSG00000275807	NA	AC145285.6	Brain_Cerebellum1	gtex	lncRNA	chr16	28468517	28468518	en	0.0390926	0.00410963	0.417	0.000256	0	16:29036613-16:31382470
ENSG00000260428	NA	SCX	Brain_Cerebellum1	gtex	protein_coding	chr8	145269214	145269215	en	0.0244753	0.0236917	0.983	0.000254	0	8:144236881-8:146303788
ENSG00000129003	NA	VPS13C	Brain_Cerebellum1	gtex	protein_coding	chr15	62278937	62278938	en	0.12876	9.54e-08	0.998	0.000254	0	15:61266132-15:63215222
ENSG00000185000	NA	DGAT1	Brain_Cerebellum1	gtex	protein_coding	chr8	145572181	145572182	en	0.0198879	0.0416771	0.981	0.000253	0	8:144236881-8:146303788
ENSG00000267586	NA	LINC00907	Brain_Cerebellum1	gtex	lncRNA	chr18	40095201	40095202	en	0.0361568	0.00582136	-0.991	0.000252	0	18:39892648-18:42921854
ENSG00000073969	NA	NSF	Brain_Cerebellum1	gtex	protein_coding	chr17	44717158	44717159	en	0.205458	5.51e-12	6.76	0.000252	0	17:43056905-17:45876022
ENSG00000149328	NA	GLB1L2	Brain_Cerebellum1	gtex	protein_coding	chr11	134219109	134219110	en	0.0673463	0.000147983	0.774	0.000251	0	11:133000260-11:134205993
ENSG00000110801	NA	PSMD9	Brain_Cerebellum1	gtex	protein_coding	chr12	122341686	122341687	en	0.0211962	0.0354346	0.233	0.000251	0	12:122009763-12:124976982
ENSG00000149930	NA	TAOK2	Brain_Cerebellum1	gtex	protein_coding	chr16	29991664	29991665	en	0.0646948	0.000202102	0.249	0.00025	0	16:29036613-16:31382470
ENSG00000011295	NA	TTC19	Brain_Cerebellum1	gtex	protein_coding	chr17	15972508	15972509	en	0.0454529	0.00193927	-1.15	0.00025	0	17:15020965-17:16411522
ENSG00000261346	NA	AC116348.3	Brain_Cerebellum1	gtex	lncRNA	chr16	30505024	30505025	en	0.153506	4.45e-09	0.167	0.000249	0	16:29036613-16:31382470
ENSG00000223534	NA	HLA-DQB1-AS1	Brain_Cerebellum1	gtex	lncRNA	chr6	32637442	32637443	en	0.194901	2.22e-11	-0.951	0.000249	0	6:31571337-6:32682664
ENSG00000132677	NA	RHBG	Brain_Cerebellum1	gtex	protein_coding	chr1	156290276	156290277	en	0.0551977	0.000616607	0.396	0.000249	0	1:154770403-1:156336133
ENSG00000177238	NA	TRIM72	Brain_Cerebellum1	gtex	protein_coding	chr16	31240527	31240528	en	0.153303	4.57e-09	0.678	0.000249	0	16:29036613-16:31382470
ENSG00000158023	NA	WDR66	Brain_Cerebellum1	gtex	protein_coding	chr12	122342420	122342421	en	0.235412	9.68e-14	0.54	0.000249	0	12:122009763-12:124976982
ENSG00000260487	NA	AC116348.1	Brain_Cerebellum1	gtex	lncRNA	chr16	30505115	30505116	en	0.38654	9.6e-24	0.35	0.000248	0	16:29036613-16:31382470
ENSG00000180921	NA	FAM83H	Brain_Cerebellum1	gtex	protein_coding	chr8	144817674	144817675	en	0.411719	1.22e-25	0.958	0.000248	0	8:144236881-8:146303788
ENSG00000272172	NA	AC138696.2	Brain_Cerebellum1	gtex	lncRNA	chr8	144617672	144617673	en	0.103327	2.08e-06	0.954	0.000247	0	8:144236881-8:146303788
ENSG00000261587	NA	TMEM249	Brain_Cerebellum1	gtex	protein_coding	chr8	145610327	145610328	en	0.240565	4.76e-14	-0.952	0.000246	0	8:144236881-8:146303788
ENSG00000249258	NA	AC079193.2	Brain_Cerebellum1	gtex	lncRNA	chr8	17004270	17004271	en	0.0672817	0.000149112	0.959	0.000245	0	8:15991660-8:17387624
ENSG00000187688	NA	TRPV2	Brain_Cerebellum1	gtex	protein_coding	chr17	16346526	16346527	en	0.169209	6.12e-10	-1.19	0.000245	0	17:15020965-17:16411522
ENSG00000198169	NA	ZNF251	Brain_Cerebellum1	gtex	protein_coding	chr8	145933130	145933131	en	0.393347	3e-24	0.945	0.000245	0	8:144236881-8:146303788
ENSG00000108424	NA	KPNB1	Brain_Cerebellum1	gtex	protein_coding	chr17	45779255	45779256	en	0.0333175	0.00816304	0.889	0.000244	0	17:43056905-17:45876022
ENSG00000125409	NA	TEKT3	Brain_Cerebellum1	gtex	protein_coding	chr17	15346472	15346473	en	0.359431	8.74e-22	0.149	0.000244	0	17:15020965-17:16411522
ENSG00000175106	NA	TVP23C	Brain_Cerebellum1	gtex	protein_coding	chr17	15418736	15418737	en	0.248265	1.63e-14	-0.613	0.000244	0	17:15020965-17:16411522
ENSG00000138764	NA	CCNG2	Brain_Cerebellum1	gtex	protein_coding	chr4	78086943	78086944	en	0.156961	2.89e-09	0.383	0.000243	0	4:77130707-4:79093979
ENSG00000138758	NA	SEPTIN11	Brain_Cerebellum1	gtex	protein_coding	chr4	77920274	77920275	en	0.242266	3.76e-14	0.344	0.000243	0	4:77130707-4:79093979
ENSG00000174939	NA	ASPHD1	Brain_Cerebellum1	gtex	protein_coding	chr16	29920120	29920121	en	0.0907364	9.34e-06	0.615	0.000242	0	16:29036613-16:31382470
ENSG00000224389	NA	C4B	Brain_Cerebellum1	gtex	protein_coding	chr6	31989962	31989963	en	0.160489	1.85e-09	-0.919	0.000242	0	6:31571337-6:32682664
ENSG00000198952	NA	SMG5	Brain_Cerebellum1	gtex	protein_coding	chr1	156248917	156248918	en	0.191092	3.65e-11	0.415	0.000242	0	1:154770403-1:156336133
ENSG00000133059	NA	DSTYK	Brain_Cerebellum1	gtex	protein_coding	chr1	205147002	205147003	en	0.0635048	0.000232432	-0.687	0.000241	0	1:204681068-1:205922403
ENSG00000138771	NA	SHROOM3	Brain_Cerebellum1	gtex	protein_coding	chr4	77594066	77594067	en	0.502388	3.3e-33	1.04	0.000241	0	4:77130707-4:79093979
ENSG00000275371	NA	AC012645.4	Brain_Cerebellum1	gtex	lncRNA	chr16	30117774	30117775	en	0.316312	7.88e-19	-0.415	0.00024	0	16:29036613-16:31382470
ENSG00000156234	NA	CXCL13	Brain_Cerebellum1	gtex	protein_coding	chr4	78078308	78078309	en	0.0250706	0.0220337	0.348	0.000239	0	4:77130707-4:79093979
ENSG00000175868	NA	CALCB	Brain_Cerebellum1	gtex	protein_coding	chr11	15013856	15013857	en	0.145984	1.14e-08	0.926	0.000238	0	11:13373433-11:15742397
ENSG00000197858	NA	GPAA1	Brain_Cerebellum1	gtex	protein_coding	chr8	145154400	145154401	en	0.032662	0.00882759	-0.908	0.000237	0	8:144236881-8:146303788
ENSG00000090975	NA	PITPNM2	Brain_Cerebellum1	gtex	protein_coding	chr12	123609916	123609917	en	0.111842	7.46e-07	1.44	0.000236	0	12:122009763-12:124976982
ENSG00000261332	NA	AC116348.2	Brain_Cerebellum1	gtex	lncRNA	chr16	30178873	30178874	en	0.189469	4.51e-11	0.267	0.000235	0	16:29036613-16:31382470
ENSG00000239704	NA	CDRT4	Brain_Cerebellum1	gtex	protein_coding	chr17	15376474	15376475	en	0.50369	2.52e-33	-0.336	0.000235	0	17:15020965-17:16411522
ENSG00000183955	NA	KMT5A	Brain_Cerebellum1	gtex	protein_coding	chr12	123840828	123840829	en	0.196229	1.86e-11	1.44	0.000235	0	12:122009763-12:124976982
ENSG00000138767	NA	CNOT6L	Brain_Cerebellum1	gtex	protein_coding	chr4	78668011	78668012	en	0.362428	5.36e-22	0.171	0.000233	0	4:77130707-4:79093979
ENSG00000233860	NA	AC107072.2	Brain_Cerebellum1	gtex	lncRNA	chr4	77649954	77649955	en	0.0451442	0.00201111	0.0735	0.000232	0	4:77130707-4:79093979
ENSG00000241322	NA	CDRT1	Brain_Cerebellum1	gtex	protein_coding	chr17	15496458	15496459	en	0.029192	0.0133816	0.213	0.000232	0	17:15020965-17:16411522
ENSG00000137449	NA	CPEB2	Brain_Cerebellum1	gtex	protein_coding	chr4	15030021	15030022	en	0.113119	6.39e-07	0.138	0.000232	0	4:15147446-4:15926136
ENSG00000071894	NA	CPSF1	Brain_Cerebellum1	gtex	protein_coding	chr8	145634990	145634991	en	0.737984	4.03e-62	0.886	0.000232	0	8:144236881-8:146303788
ENSG00000214946	NA	TBC1D26	Brain_Cerebellum1	gtex	protein_coding	chr17	15639798	15639799	en	0.356922	1.31e-21	-0.278	0.000232	0	17:15020965-17:16411522
ENSG00000149922	NA	TBX6	Brain_Cerebellum1	gtex	protein_coding	chr16	30094978	30094979	en	0.293307	2.51e-17	0.753	0.000232	0	16:29036613-16:31382470
ENSG00000266667	NA	AC005703.4	Brain_Cerebellum1	gtex	lncRNA	chr17	15306845	15306846	en	0.0368213	0.00537958	0.076	0.000231	0	17:15020965-17:16411522
ENSG00000266538	NA	AC005838.2	Brain_Cerebellum1	gtex	lncRNA	chr17	15435168	15435169	en	0.0342801	0.00727778	0.00273	0.000231	0	17:15020965-17:16411522
ENSG00000103485	NA	QPRT	Brain_Cerebellum1	gtex	protein_coding	chr16	29675566	29675567	en	0.129157	9.09e-08	0.051	0.000231	0	16:29036613-16:31382470
ENSG00000255524	NA	NPIPB8	Brain_Cerebellum1	gtex	protein_coding	chr16	28772872	28772873	en	0.147932	8.94e-09	-0.205	0.00023	0	16:29036613-16:31382470
ENSG00000198502	NA	HLA-DRB5	Brain_Cerebellum1	gtex	protein_coding	chr6	32490471	32490472	en	0.55127	7.1e-38	0.853	0.000229	0	6:31571337-6:32682664
ENSG00000204392	NA	LSM2	Brain_Cerebellum1	gtex	protein_coding	chr6	31741886	31741887	en	0.0358927	0.00600698	-0.842	0.000229	0	6:31571337-6:32682664
ENSG00000270130	NA	AC068790.7	Brain_Cerebellum1	gtex	lncRNA	chr12	124444189	124444190	en	0.0235375	0.0265684	-0.112	0.000227	0	12:122009763-12:124976982
ENSG00000246465	NA	AC138904.1	Brain_Cerebellum1	gtex	lncRNA	chr16	28300601	28300602	en	0.068915	0.000123053	-0.0706	0.000227	0	16:29036613-16:31382470
ENSG00000184305	NA	CCSER1	Brain_Cerebellum1	gtex	protein_coding	chr4	91863821	91863822	en	0.0768316	4.84e-05	-0.555	0.000227	0	4:90231746-4:91560677
ENSG00000198715	NA	GLMP	Brain_Cerebellum1	gtex	protein_coding	chr1	156260065	156260066	en	0.036209	0.00578534	0.208	0.000224	0	1:154770403-1:156336133
ENSG00000117266	NA	CDK18	Brain_Cerebellum1	gtex	protein_coding	chr1	205490583	205490584	en	0.0368978	0.00533095	0.868	0.000223	0	1:204681068-1:205922403
ENSG00000227617	NA	CERS6-AS1	Brain_Cerebellum1	gtex	lncRNA	chr2	169612394	169612395	en	0.0614412	0.000296191	0.845	0.000222	0	2:167356254-2:169968112
ENSG00000111358	NA	GTF2H3	Brain_Cerebellum1	gtex	protein_coding	chr12	124383416	124383417	en	0.135847	4e-08	-0.2	0.000222	0	12:122009763-12:124976982
ENSG00000196735	NA	HLA-DQA1	Brain_Cerebellum1	gtex	protein_coding	chr6	32571485	32571486	en	0.10117	2.69e-06	-0.814	0.000222	0	6:31571337-6:32682664
ENSG00000086598	NA	TMED2	Brain_Cerebellum1	gtex	protein_coding	chr12	123927759	123927760	en	0.103004	2.16e-06	-0.568	0.000222	0	12:122009763-12:124976982
ENSG00000058063	NA	ATP11B	Brain_Cerebellum1	gtex	protein_coding	chr3	182574314	182574315	en	0.0271425	0.0171354	-0.83	0.000221	0	3:181511166-3:183769683
ENSG00000111361	NA	EIF2B1	Brain_Cerebellum1	gtex	protein_coding	chr12	124106754	124106755	en	0.0512614	0.000979145	0.0454	0.000221	0	12:122009763-12:124976982
ENSG00000168778	NA	TCTN2	Brain_Cerebellum1	gtex	protein_coding	chr12	124164800	124164801	en	0.260931	2.74e-15	0.786	0.000221	0	12:122009763-12:124976982
ENSG00000188735	NA	TMEM120B	Brain_Cerebellum1	gtex	protein_coding	chr12	122189159	122189160	en	0.137881	3.11e-08	-0.132	0.00022	0	12:122009763-12:124976982
ENSG00000104524	NA	PYCR3	Brain_Cerebellum1	gtex	protein_coding	chr8	144683389	144683390	en	0.108899	1.06e-06	0.815	0.000219	0	8:144236881-8:146303788
ENSG00000256092	NA	SBNO1-AS1	Brain_Cerebellum1	gtex	lncRNA	chr12	123967593	123967594	en	0.208972	3.46e-12	-0.413	0.000219	0	12:122009763-12:124976982
ENSG00000104763	NA	ASAH1	Brain_Cerebellum1	gtex	protein_coding	chr8	18039622	18039623	en	0.369341	1.72e-22	0.82	0.000217	0	8:15991660-8:17387624
ENSG00000110987	NA	BCL7A	Brain_Cerebellum1	gtex	protein_coding	chr12	122454513	122454514	en	0.0219369	0.0323389	-0.0398	0.000217	0	12:122009763-12:124976982
ENSG00000143537	NA	ADAM15	Brain_Cerebellum1	gtex	protein_coding	chr1	155045991	155045992	en	0.301763	7.13e-18	0.342	0.000216	0	1:154770403-1:156336133
ENSG00000237390	NA	AL139130.1	Brain_Cerebellum1	gtex	lncRNA	chr1	156347995	156347996	en	0.0536492	0.000739612	-0.205	0.000215	0	1:154770403-1:156336133
ENSG00000160972	NA	PPP1R16A	Brain_Cerebellum1	gtex	protein_coding	chr8	145715099	145715100	en	0.0258323	0.0200847	-0.794	0.000215	0	8:144236881-8:146303788
ENSG00000129083	NA	COPB1	Brain_Cerebellum1	gtex	protein_coding	chr11	14494541	14494542	en	0.109188	1.03e-06	-0.802	0.000214	0	11:13373433-11:15742397
ENSG00000225063	NA	AC093422.2	Brain_Cerebellum1	gtex	lncRNA	chr1	205227889	205227890	en	0.0345078	0.00708307	-0.237	0.000213	0	1:204681068-1:205922403
ENSG00000242252	NA	BGLAP	Brain_Cerebellum1	gtex	protein_coding	chr1	156224533	156224534	en	0.0665593	0.000162329	-0.109	0.000212	0	1:154770403-1:156336133
ENSG00000158711	NA	ELK4	Brain_Cerebellum1	gtex	protein_coding	chr1	205584244	205584245	en	0.0278516	0.0157282	1.38	0.000212	0	1:204681068-1:205922403
ENSG00000188613	NA	NANOS1	Brain_Cerebellum1	gtex	protein_coding	chr10	120771980	120771981	en	0.143291	1.59e-08	0.778	0.000212	0	10:120591693-10:122407323
ENSG00000272824	NA	AC245100.6	Brain_Cerebellum1	gtex	lncRNA	chr1	147779486	147779487	en	0.079585	3.5e-05	-0.783	0.000211	0	1:144977648-1:148360712
ENSG00000185477	NA	GPRIN3	Brain_Cerebellum1	gtex	protein_coding	chr4	90173820	90173821	en	0.253647	7.68e-15	-1.42	0.00021	0	4:90231746-4:91560677
ENSG00000240053	NA	LY6G5B	Brain_Cerebellum1	gtex	protein_coding	chr6	31651157	31651158	en	0.388153	7.3e-24	0.733	0.00021	0	6:31571337-6:32682664
ENSG00000119979	NA	DENND10	Brain_Cerebellum1	gtex	protein_coding	chr10	120879208	120879209	en	0.0409799	0.00328731	-0.753	0.000208	0	10:120591693-10:122407323
ENSG00000232629	NA	HLA-DQB2	Brain_Cerebellum1	gtex	protein_coding	chr6	32631897	32631898	en	0.309119	2.36e-18	0.723	0.000208	0	6:31571337-6:32682664
ENSG00000167702	NA	KIFC2	Brain_Cerebellum1	gtex	protein_coding	chr8	145674457	145674458	en	0.253037	8.36e-15	-0.746	0.000208	0	8:144236881-8:146303788
ENSG00000163072	NA	NOSTRIN	Brain_Cerebellum1	gtex	protein_coding	chr2	169711553	169711554	en	0.0371247	0.00518927	-0.766	0.000208	0	2:167356254-2:169968112
ENSG00000203499	NA	IQANK1	Brain_Cerebellum1	gtex	protein_coding	chr8	144847667	144847668	en	0.481777	2.25e-31	0.728	0.000205	0	8:144236881-8:146303788
ENSG00000003987	NA	MTMR7	Brain_Cerebellum1	gtex	protein_coding	chr8	17196400	17196401	en	0.0274028	0.0166046	0.734	0.000204	0	8:15991660-8:17387624
ENSG00000243384	NA	AC119424.1	Brain_Cerebellum1	gtex	lncRNA	chr3	58560161	58560162	en	0.0855546	1.73e-05	-0.62	0.000202	0	3:58157850-3:60272829
ENSG00000236234	NA	AC091132.2	Brain_Cerebellum1	gtex	lncRNA	chr17	43505469	43505470	en	0.16008	1.95e-09	7.54	0.000201	0	17:43056905-17:45876022
ENSG00000233885	NA	YEATS2-AS1	Brain_Cerebellum1	gtex	lncRNA	chr3	183531278	183531279	en	0.54495	3.04e-37	-0.704	0.000201	0	3:181511166-3:183769683
ENSG00000179832	NA	MROH1	Brain_Cerebellum1	gtex	protein_coding	chr8	145221090	145221091	en	0.0861012	1.62e-05	0.686	0.0002	0	8:144236881-8:146303788
ENSG00000243649	NA	CFB	Brain_Cerebellum1	gtex	protein_coding	chr6	31931296	31931297	en	0.108961	1.06e-06	0.65	0.000198	0	6:31571337-6:32682664
ENSG00000204839	NA	MROH6	Brain_Cerebellum1	gtex	protein_coding	chr8	144637683	144637684	en	0.541361	6.87e-37	0.66	0.000196	0	8:144236881-8:146303788
ENSG00000159314	NA	ARHGAP27	Brain_Cerebellum1	gtex	protein_coding	chr17	43476324	43476325	en	0.3492	4.57e-21	-6.22	0.000194	0	17:43056905-17:45876022
ENSG00000204463	NA	BAG6	Brain_Cerebellum1	gtex	protein_coding	chr6	31680192	31680193	en	0.404481	4.35e-25	-0.597	0.000194	0	6:31571337-6:32682664
ENSG00000179091	NA	CYC1	Brain_Cerebellum1	gtex	protein_coding	chr8	145120710	145120711	en	0.0632555	0.00023934	-0.641	0.000194	0	8:144236881-8:146303788
ENSG00000147813	NA	NAPRT	Brain_Cerebellum1	gtex	protein_coding	chr8	144659596	144659597	en	0.645293	1.77e-48	0.645	0.000194	0	8:144236881-8:146303788
ENSG00000136068	NA	FLNB	Brain_Cerebellum1	gtex	protein_coding	chr3	58070796	58070797	en	0.356792	1.34e-21	-0.553	0.000193	0	3:58157850-3:60272829
ENSG00000255559	NA	ZNF252P-AS1	Brain_Cerebellum1	gtex	lncRNA	chr8	146223560	146223561	en	0.0253022	0.0214214	-0.638	0.000193	0	8:144236881-8:146303788
ENSG00000235663	NA	SAPCD1-AS1	Brain_Cerebellum1	gtex	lncRNA	chr6	31743412	31743413	en	0.045059	0.0020314	-0.459	0.000192	0	6:31571337-6:32682664
ENSG00000274372	NA	LINC02804	Brain_Cerebellum1	gtex	lncRNA	chr1	147161076	147161077	en	0.0491729	0.00125165	-0.641	0.000191	0	1:144977648-1:148360712
ENSG00000131778	NA	CHD1L	Brain_Cerebellum1	gtex	protein_coding	chr1	146744168	146744169	en	0.366889	2.58e-22	0.624	0.000189	0	1:144977648-1:148360712
ENSG00000076003	NA	MCM6	Brain_Cerebellum1	gtex	protein_coding	chr2	136585440	136585441	en	0.147793	9.09e-09	0.601	0.000189	0	2:135159453-2:137042794
ENSG00000198933	NA	TBKBP1	Brain_Cerebellum1	gtex	protein_coding	chr17	45791731	45791732	en	0.0486851	0.00132556	1.07	0.000189	0	17:43056905-17:45876022
ENSG00000276790	NA	AC068234.3	Brain_Cerebellum1	gtex	lncRNA	chr17	45357914	45357915	en	0.0985763	3.67e-06	1.06	0.000188	0	17:43056905-17:45876022
ENSG00000139116	NA	KIF21A	Brain_Cerebellum1	gtex	protein_coding	chr12	39755307	39755308	en	0.083012	2.33e-05	-0.61	0.000188	0	12:39227446-12:40816185
ENSG00000204428	NA	LY6G5C	Brain_Cerebellum1	gtex	protein_coding	chr6	31650997	31650998	en	0.564315	3.31e-39	0.564	0.000188	0	6:31571337-6:32682664
ENSG00000133818	NA	RRAS2	Brain_Cerebellum1	gtex	protein_coding	chr11	14292416	14292417	en	0.0987428	3.6e-06	0.607	0.000187	0	11:13373433-11:15742397
ENSG00000144229	NA	THSD7B	Brain_Cerebellum1	gtex	protein_coding	chr2	138043514	138043515	en	0.146099	1.12e-08	-0.588	0.000187	0	2:135159453-2:137042794
ENSG00000255050	NA	AC067930.4	Brain_Cerebellum1	gtex	lncRNA	chr8	144663034	144663035	en	0.465359	5.78e-30	0.567	0.000186	0	8:144236881-8:146303788
ENSG00000204305	NA	AGER	Brain_Cerebellum1	gtex	protein_coding	chr6	32125203	32125204	en	0.165571	9.72e-10	0.524	0.000186	0	6:31571337-6:32682664
ENSG00000172318	NA	B3GALT1	Brain_Cerebellum1	gtex	protein_coding	chr2	168727214	168727215	en	0.125622	1.4e-07	0.597	0.000186	0	2:167356254-2:169968112
ENSG00000090539	NA	CHRD	Brain_Cerebellum1	gtex	protein_coding	chr3	184165797	184165798	en	0.223078	5.2e-13	0.588	0.000186	0	3:181511166-3:183769683
ENSG00000204421	NA	LY6G6C	Brain_Cerebellum1	gtex	protein_coding	chr6	31692422	31692423	en	0.0199121	0.0415519	-0.502	0.000185	0	6:31571337-6:32682664
ENSG00000187954	NA	CYHR1	Brain_Cerebellum1	gtex	protein_coding	chr8	145656054	145656055	en	0.133794	5.15e-08	0.55	0.000184	0	8:144236881-8:146303788
ENSG00000272115	NA	AC233992.3	Brain_Cerebellum1	gtex	lncRNA	chr8	145591311	145591312	en	0.0432633	0.0025104	-0.542	0.000183	0	8:144236881-8:146303788
ENSG00000197363	NA	ZNF517	Brain_Cerebellum1	gtex	protein_coding	chr8	146043634	146043635	en	0.255135	6.23e-15	-0.549	0.000183	0	8:144236881-8:146303788
ENSG00000204356	NA	NELFE	Brain_Cerebellum1	gtex	protein_coding	chr6	31968262	31968263	en	0.0485567	0.00134574	-0.386	0.000182	0	6:31571337-6:32682664
ENSG00000104213	NA	PDGFRL	Brain_Cerebellum1	gtex	protein_coding	chr8	17449670	17449671	en	0.0514645	0.00095606	0.558	0.000182	0	8:15991660-8:17387624
ENSG00000179698	NA	WDR97	Brain_Cerebellum1	gtex	protein_coding	chr8	145119471	145119472	en	0.538493	1.31e-36	0.511	0.00018	0	8:144236881-8:146303788
ENSG00000236107	NA	SCN1A-AS1	Brain_Cerebellum1	gtex	lncRNA	chr2	166866042	166866043	en	0.0978498	4e-06	0.524	0.000179	0	2:167356254-2:169968112
ENSG00000179886	NA	TIGD5	Brain_Cerebellum1	gtex	protein_coding	chr8	144690995	144690996	en	0.101147	2.7e-06	-0.49	0.000178	0	8:144236881-8:146303788
ENSG00000168306	NA	ACOX2	Brain_Cerebellum1	gtex	protein_coding	chr3	58548174	58548175	en	0.0676221	0.000143262	-0.441	0.000177	0	3:58157850-3:60272829
ENSG00000213760	NA	ATP6V1G2	Brain_Cerebellum1	gtex	protein_coding	chr6	31516595	31516596	en	0.11983	2.84e-07	-0.397	0.000177	0	6:31571337-6:32682664
ENSG00000181097	NA	AC105219.1	Brain_Cerebellum1	gtex	lncRNA	chr8	144779724	144779725	en	0.11006	9.25e-07	0.471	0.000176	0	8:144236881-8:146303788
ENSG00000121988	NA	ZRANB3	Brain_Cerebellum1	gtex	protein_coding	chr2	136040535	136040536	en	0.0385529	0.00438089	-0.473	0.000176	0	2:135159453-2:137042794
ENSG00000241106	NA	HLA-DOB	Brain_Cerebellum1	gtex	protein_coding	chr6	32771641	32771642	en	0.685235	7.35e-54	-0.286	0.000175	0	6:31571337-6:32682664
ENSG00000137312	NA	FLOT1	Brain_Cerebellum1	gtex	protein_coding	chr6	30693983	30693984	en	0.37303	9.31e-23	0.367	0.000174	0	6:31571337-6:32682664
ENSG00000163684	NA	RPP14	Brain_Cerebellum1	gtex	protein_coding	chr3	58298082	58298083	en	0.229186	2.27e-13	-0.367	0.000174	0	3:58157850-3:60272829
ENSG00000262655	NA	SPON1	Brain_Cerebellum1	gtex	protein_coding	chr11	14061392	14061393	en	0.446097	2.3e-28	0.459	0.000174	0	11:13373433-11:15742397
ENSG00000174827	NA	PDZK1	Brain_Cerebellum1	gtex	protein_coding	chr1	146604592	146604593	en	0.0225105	0.030135	-0.42	0.000171	0	1:144977648-1:148360712
ENSG00000160949	NA	TONSL	Brain_Cerebellum1	gtex	protein_coding	chr8	145668243	145668244	en	0.223274	5.07e-13	-0.403	0.000171	0	8:144236881-8:146303788
ENSG00000182325	NA	FBXL6	Brain_Cerebellum1	gtex	protein_coding	chr8	145647715	145647716	en	0.0621694	0.000271912	-0.386	0.00017	0	8:144236881-8:146303788
ENSG00000204520	NA	MICA	Brain_Cerebellum1	gtex	protein_coding	chr6	31559009	31559010	en	0.24462	2.71e-14	0.278	0.000169	0	6:31571337-6:32682664
ENSG00000259251	NA	AC104590.1	Brain_Cerebellum1	gtex	lncRNA	chr15	62356723	62356724	en	0.0657349	0.000178849	0.387	0.000168	0	15:61266132-15:63215222
ENSG00000188092	NA	GPR89B	Brain_Cerebellum1	gtex	protein_coding	chr1	147171234	147171235	en	0.0701096	0.000106918	-0.386	0.000168	0	1:144977648-1:148360712
ENSG00000261678	NA	SCRT1	Brain_Cerebellum1	gtex	protein_coding	chr8	145352102	145352103	en	0.064143	0.000215641	0.342	0.000168	0	8:144236881-8:146303788
ENSG00000168936	NA	TMEM129	Brain_Cerebellum1	gtex	protein_coding	chr4	1254978	1254979	en	0.362761	5.07e-22	2.04	0.000167	0	4:695146-4:1478711
ENSG00000185829	NA	ARL17A	Brain_Cerebellum1	gtex	protein_coding	chr17	44573647	44573648	en	0.594722	1.81e-42	-2.47	0.000165	0	17:43056905-17:45876022
ENSG00000148925	NA	BTBD10	Brain_Cerebellum1	gtex	protein_coding	chr11	13451350	13451351	en	0.0508439	0.0010284	0.331	0.000165	0	11:13373433-11:15742397
ENSG00000140416	NA	TPM1	Brain_Cerebellum1	gtex	protein_coding	chr15	63121028	63121029	en	0.554335	3.49e-38	-0.324	0.000165	0	15:61266132-15:63215222
ENSG00000108379	NA	WNT3	Brain_Cerebellum1	gtex	protein_coding	chr17	44832172	44832173	en	0.366818	2.61e-22	-2.62	0.000165	0	17:43056905-17:45876022
ENSG00000170631	NA	ZNF16	Brain_Cerebellum1	gtex	protein_coding	chr8	146159797	146159798	en	0.0269585	0.0175212	0.285	0.000165	0	8:144236881-8:146303788
ENSG00000213722	NA	DDAH2	Brain_Cerebellum1	gtex	protein_coding	chr6	31717115	31717116	en	0.196045	1.91e-11	0.166	0.000164	0	6:31571337-6:32682664
ENSG00000108883	NA	EFTUD2	Brain_Cerebellum1	gtex	protein_coding	chr17	43005350	43005351	en	0.0687036	0.000126151	4.23	0.000164	0	17:43056905-17:45876022
ENSG00000261150	NA	EPPK1	Brain_Cerebellum1	gtex	protein_coding	chr8	144955507	144955508	en	0.268806	8.92e-16	-0.258	0.000164	0	8:144236881-8:146303788
ENSG00000127418	NA	FGFRL1	Brain_Cerebellum1	gtex	protein_coding	chr4	1006012	1006013	en	0.124097	1.69e-07	-2.12	0.000164	0	4:695146-4:1478711
ENSG00000204315	NA	FKBPL	Brain_Cerebellum1	gtex	protein_coding	chr6	32080284	32080285	en	0.0433462	0.00248597	0.0552	0.000164	0	6:31571337-6:32682664
ENSG00000213654	NA	GPSM3	Brain_Cerebellum1	gtex	protein_coding	chr6	32119791	32119792	en	0.0903625	9.76e-06	0.0818	0.000164	0	6:31571337-6:32682664
ENSG00000179526	NA	SHARPIN	Brain_Cerebellum1	gtex	protein_coding	chr8	145161635	145161636	en	0.0730046	7.6e-05	0.28	0.000164	0	8:144236881-8:146303788
ENSG00000160948	NA	VPS28	Brain_Cerebellum1	gtex	protein_coding	chr8	145613178	145613179	en	0.324699	2.17e-19	-0.259	0.000164	0	8:144236881-8:146303788
ENSG00000255182	NA	AC084125.2	Brain_Cerebellum1	gtex	lncRNA	chr8	145552094	145552095	en	0.373901	8.06e-23	0.2	0.000162	0	8:144236881-8:146303788
ENSG00000204438	NA	GPANK1	Brain_Cerebellum1	gtex	protein_coding	chr6	31630085	31630086	en	0.0424876	0.00275104	0.0584	0.000162	0	6:31571337-6:32682664
ENSG00000232600	NA	TONSL-AS1	Brain_Cerebellum1	gtex	lncRNA	chr8	145654275	145654276	en	0.119438	2.97e-07	0.208	0.000162	0	8:144236881-8:146303788
ENSG00000173137	NA	ADCK5	Brain_Cerebellum1	gtex	protein_coding	chr8	145622073	145622074	en	0.043443	0.00245774	-0.193	0.000161	0	8:144236881-8:146303788
ENSG00000114859	NA	CLCN2	Brain_Cerebellum1	gtex	protein_coding	chr3	183978979	183978980	en	0.0643991	0.000209248	0.215	0.000161	0	3:181511166-3:183769683
ENSG00000198791	NA	CNOT7	Brain_Cerebellum1	gtex	protein_coding	chr8	17149031	17149032	en	0.346978	6.52e-21	-0.237	0.000161	0	8:15991660-8:17387624
ENSG00000254973	NA	AC105219.4	Brain_Cerebellum1	gtex	lncRNA	chr8	144849993	144849994	en	0.238625	6.22e-14	-0.14	0.00016	0	8:144236881-8:146303788
ENSG00000167701	NA	GPT	Brain_Cerebellum1	gtex	protein_coding	chr8	145568835	145568836	en	0.132765	5.84e-08	0.152	0.00016	0	8:144236881-8:146303788
ENSG00000176956	NA	LY6H	Brain_Cerebellum1	gtex	protein_coding	chr8	144274809	144274810	en	0.172957	3.79e-10	-0.138	0.00016	0	8:144236881-8:146303788
ENSG00000147804	NA	SLC39A4	Brain_Cerebellum1	gtex	protein_coding	chr8	145646833	145646834	en	0.213038	2.01e-12	-0.134	0.00016	0	8:144236881-8:146303788
ENSG00000181638	NA	ZFP41	Brain_Cerebellum1	gtex	protein_coding	chr8	144795514	144795515	en	0.0292854	0.0132322	0.132	0.00016	0	8:144236881-8:146303788
ENSG00000254812	NA	AC067930.2	Brain_Cerebellum1	gtex	lncRNA	chr8	144720874	144720875	en	0.0300377	0.012088	0.103	0.000159	0	8:144236881-8:146303788
ENSG00000213563	NA	C8orf82	Brain_Cerebellum1	gtex	protein_coding	chr8	145741945	145741946	en	0.083978	2.08e-05	0.0836	0.000159	0	8:144236881-8:146303788
ENSG00000018236	NA	CNTN1	Brain_Cerebellum1	gtex	protein_coding	chr12	41297459	41297460	en	0.323939	2.44e-19	-0.156	0.000159	0	12:40816185-12:41658193
ENSG00000115866	NA	DARS	Brain_Cerebellum1	gtex	protein_coding	chr2	136899468	136899469	en	0.0547882	0.000646994	-0.135	0.000159	0	2:135159453-2:137042794
ENSG00000104518	NA	GSDMD	Brain_Cerebellum1	gtex	protein_coding	chr8	144638654	144638655	en	0.169682	5.76e-10	0.0976	0.000159	0	8:144236881-8:146303788
ENSG00000253716	NA	MINCR	Brain_Cerebellum1	gtex	lncRNA	chr8	144368668	144368669	en	0.413307	9.18e-26	0.0577	0.000159	0	8:144236881-8:146303788
ENSG00000184428	NA	TOP1MT	Brain_Cerebellum1	gtex	protein_coding	chr8	144415416	144415417	en	0.240898	4.54e-14	-0.0912	0.000159	0	8:144236881-8:146303788
ENSG00000183309	NA	ZNF623	Brain_Cerebellum1	gtex	protein_coding	chr8	144709011	144709012	en	0.377336	4.54e-23	0.0727	0.000159	0	8:144236881-8:146303788
ENSG00000185730	NA	ZNF696	Brain_Cerebellum1	gtex	protein_coding	chr8	144302092	144302093	en	0.0665121	0.000163233	-0.0973	0.000159	0	8:144236881-8:146303788
ENSG00000273179	NA	AC092535.5	Brain_Cerebellum1	gtex	lncRNA	chr4	1163684	1163685	en	0.172438	4.05e-10	-0.0304	0.000158	0	4:695146-4:1478711
ENSG00000259370	NA	AC103740.1	Brain_Cerebellum1	gtex	lncRNA	chr15	63141535	63141536	en	0.31055	1.9e-18	-0.155	0.000158	0	15:61266132-15:63215222
ENSG00000250571	NA	GLI4	Brain_Cerebellum1	gtex	protein_coding	chr8	144334966	144334967	en	0.0750619	5.97e-05	0.00762	0.000158	0	8:144236881-8:146303788
ENSG00000188487	NA	INSC	Brain_Cerebellum1	gtex	protein_coding	chr11	15230787	15230788	en	0.109379	1e-06	-0.157	0.000158	0	11:13373433-11:15742397
ENSG00000048991	NA	R3HDM1	Brain_Cerebellum1	gtex	protein_coding	chr2	136268096	136268097	en	0.0515622	0.000945141	0.042	0.000158	0	2:135159453-2:137042794
ENSG00000158106	NA	RHPN1	Brain_Cerebellum1	gtex	protein_coding	chr8	144427269	144427270	en	0.0433528	0.00248403	0.011	0.000158	0	8:144236881-8:146303788
ENSG00000168517	NA	HEXIM2	Brain_Cerebellum1	gtex	protein_coding	chr17	43263747	43263748	en	0.0205731	0.0382766	-1.51	0.000157	0	17:43056905-17:45876022
ENSG00000038945	NA	MSR1	Brain_Cerebellum1	gtex	protein_coding	chr8	16462812	16462813	en	0.0921801	7.86e-06	-0.0704	0.000157	0	8:15991660-8:17387624
ENSG00000159674	NA	SPON2	Brain_Cerebellum1	gtex	protein_coding	chr4	1116098	1116099	en	0.0924912	7.58e-06	-0.677	0.000144	0	4:695146-4:1478711
ENSG00000178852	NA	EFCAB13	Brain_Cerebellum1	gtex	protein_coding	chr17	45451799	45451800	en	0.217786	1.06e-12	-0.494	0.000143	0	17:43056905-17:45876022
ENSG00000131094	NA	C1QL1	Brain_Cerebellum1	gtex	protein_coding	chr17	43035873	43035874	en	0.038318	0.00450453	1.64	0.000139	0	17:43056905-17:45876022
ENSG00000159733	NA	ZFYVE28	Brain_Cerebellum1	gtex	protein_coding	chr4	2323378	2323379	en	0.152523	5.04e-09	0.599	0.000138	0	4:695146-4:1478711
ENSG00000184361	NA	SPATA32	Brain_Cerebellum1	gtex	protein_coding	chr17	43330143	43330144	en	0.0289968	0.0136997	1.2	0.000135	0	17:43056905-17:45876022
ENSG00000263293	NA	AC068234.2	Brain_Cerebellum1	gtex	lncRNA	chr17	45389939	45389940	en	0.047311	0.00155819	0.586	0.000132	0	17:43056905-17:45876022
ENSG00000228696	NA	ARL17B	Brain_Cerebellum1	gtex	protein_coding	chr17	44369443	44369444	en	0.565939	2.25e-39	2.03	0.000132	0	17:43056905-17:45876022
ENSG00000276728	NA	AC142472.1	Brain_Cerebellum1	gtex	lncRNA	chr17	43219692	43219693	en	0.0273911	0.016628	-0.132	0.000127	0	17:43056905-17:45876022
ENSG00000120071	NA	KANSL1	Brain_Cerebellum1	gtex	protein_coding	chr17	44242901	44242902	en	0.423511	1.48e-26	1.96	0.000127	0	17:43056905-17:45876022
ENSG00000262879	NA	AC005670.3	Brain_Cerebellum1	gtex	lncRNA	chr17	45099824	45099825	en	0.362301	5.47e-22	-0.685	0.000126	0	17:43056905-17:45876022
ENSG00000267198	NA	AC091132.4	Brain_Cerebellum1	gtex	lncRNA	chr17	44204606	44204607	en	0.19537	2.08e-11	1.98	0.000126	0	17:43056905-17:45876022
ENSG00000262372	NA	CR936218.1	Brain_Cerebellum1	gtex	lncRNA	chr17	44133605	44133606	en	0.0187803	0.0478562	2.03	0.000126	0	17:43056905-17:45876022
ENSG00000214401	NA	KANSL1-AS1	Brain_Cerebellum1	gtex	lncRNA	chr17	44276912	44276913	en	0.633362	5.5e-47	1.91	0.000126	0	17:43056905-17:45876022
ENSG00000006025	NA	OSBPL7	Brain_Cerebellum1	gtex	protein_coding	chr17	45867747	45867748	en	0.149557	7.3e-09	-0.37	0.000125	0	17:43056905-17:45876022
ENSG00000238083	NA	LRRC37A2	Brain_Cerebellum1	gtex	protein_coding	chr17	44463213	44463214	en	0.698662	7.99e-56	0.701	0.000124	0	17:43056905-17:45876022
ENSG00000163945	NA	UVSSA	Brain_Cerebellum1	gtex	protein_coding	chr4	1361421	1361422	en	0.562722	4.84e-39	-0.414	0.000121	0	4:695146-4:1478711
ENSG00000090316	NA	MAEA	Brain_Cerebellum1	gtex	protein_coding	chr4	1303192	1303193	en	0.385009	1.25e-23	0.493	0.000119	0	4:695146-4:1478711
ENSG00000159692	NA	CTBP1	Brain_Cerebellum1	gtex	protein_coding	chr4	1240420	1240421	en	0.113436	6.15e-07	-0.746	0.000118	0	4:695146-4:1478711
ENSG00000108433	NA	GOSR2	Brain_Cerebellum1	gtex	protein_coding	chr17	45101405	45101406	en	0.0861148	1.62e-05	-1.02	0.000117	0	17:43056905-17:45876022
ENSG00000253347	NA	AC040934.1	Brain_Cerebellum1	gtex	lncRNA	chr17	45491970	45491971	en	0.0293441	0.0131391	0.00927	0.000116	0	17:43056905-17:45876022
ENSG00000196810	NA	CTBP1-DT	Brain_Cerebellum1	gtex	lncRNA	chr4	1249830	1249831	en	0.446444	2.15e-28	0.877	0.000116	0	4:695146-4:1478711
ENSG00000189120	NA	SP6	Brain_Cerebellum1	gtex	protein_coding	chr17	45942302	45942303	en	0.0468041	0.00165398	0.0201	0.000116	0	17:43056905-17:45876022
ENSG00000233175	NA	AC008105.1	Brain_Cerebellum1	gtex	lncRNA	chr17	43295964	43295965	en	0.414222	7.8e-26	1.49	0.000115	0	17:43056905-17:45876022
ENSG00000181513	NA	ACBD4	Brain_Cerebellum1	gtex	protein_coding	chr17	43198398	43198399	en	0.293601	2.41e-17	1.46	0.000115	0	17:43056905-17:45876022
ENSG00000179673	NA	RPRML	Brain_Cerebellum1	gtex	protein_coding	chr17	45065620	45065621	en	0.057272	0.000483298	-1.04	0.000115	0	17:43056905-17:45876022
ENSG00000264920	NA	AC018521.5	Brain_Cerebellum1	gtex	lncRNA	chr17	45970421	45970422	en	0.208632	3.62e-12	0.0852	0.000114	0	17:43056905-17:45876022
ENSG00000227189	NA	AC092535.2	Brain_Cerebellum1	gtex	lncRNA	chr4	1234490	1234491	en	0.0758381	5.44e-05	0.0791	0.000114	0	4:695146-4:1478711
ENSG00000169026	NA	SLC49A3	Brain_Cerebellum1	gtex	protein_coding	chr4	690400	690401	en	0.234421	1.11e-13	0.508	0.000111	0	4:695146-4:1478711
ENSG00000004468	NA	CD38	Brain_Cortex1	gtex	protein_coding	chr4	15854541	15854542	en	0.232332	2.53e-13	-7.97	1	0	4:15147446-4:15926136
ENSG00000138722	NA	MMRN1	Brain_Cortex1	gtex	protein_coding	chr4	90850708	90850709	en	0.177688	3.09e-10	7.2	1	0	4:90231746-4:91560677
ENSG00000117280	NA	RAB29	Brain_Cortex1	gtex	protein_coding	chr1	205745384	205745385	en	0.169617	8.51e-10	6.64	1	0	1:204681068-1:205922403
ENSG00000127415	NA	IDUA	Brain_Cortex1	gtex	protein_coding	chr4	954049	954050	en	0.0351469	0.00710826	-6.33	0.999	1	4:695146-4:1478711
ENSG00000138760	NA	SCARB2	Brain_Cortex1	gtex	protein_coding	chr4	77078146	77078147	en	0.0272325	0.0180518	5.67	0.999	1	4:77130707-4:79093979
ENSG00000164182	NA	NDUFAF2	Brain_Cortex1	gtex	protein_coding	chr5	60298322	60298323	en	0.0693051	0.000136883	5.5	0.996	0	5:58524622-5:60935451
ENSG00000152128	NA	TMEM163	Brain_Cortex1	gtex	protein_coding	chr2	135316770	135316771	en	0.10403	2.4e-06	5	0.968	0	2:135159453-2:137042794
ENSG00000243368	NA	MCCC1-AS1	Brain_Cortex1	gtex	lncRNA	chr3	182775850	182775851	en	0.0511726	0.00110839	-4.71	0.963	1	3:181511166-3:183769683
ENSG00000136243	NA	NUPL2	Brain_Cortex1	gtex	protein_coding	chr7	23240042	23240043	en	0.388835	1.76e-23	5.12	0.935	0	7:22508611-7:23469560
ENSG00000176681	NA	LRRC37A	Brain_Cortex1	gtex	protein_coding	chr17	44493633	44493634	en	0.664468	4.98e-50	-9.07	0.71	1	17:43056905-17:45876022
ENSG00000078070	NA	MCCC1	Brain_Cortex1	gtex	protein_coding	chr3	182821004	182821005	en	0.130937	9.77e-08	-1.37	0.68	0	3:181511166-3:183769683
ENSG00000169242	NA	EFNA1	Brain_Cortex1	gtex	protein_coding	chr1	155083752	155083753	en	0.0567256	0.000584159	4.35	0.588	1	1:154770403-1:156336133
ENSG00000189157	NA	FAM47E	Brain_Cortex1	gtex	protein_coding	chr4	77145751	77145752	en	0.567839	7.71e-39	-3.98	0.508	0	4:77130707-4:79093979
ENSG00000011295	NA	TTC19	Brain_Cortex1	gtex	protein_coding	chr17	15946193	15946194	en	0.114123	7.28e-07	-4.96	0.505	1	17:15020965-17:16411522
ENSG00000099377	NA	HSD3B7	Brain_Cortex1	gtex	protein_coding	chr16	30786967	30786968	en	0.0635946	0.000264581	-5.46	0.324	1	16:29036613-16:31382470
ENSG00000103510	NA	KAT8	Brain_Cortex1	gtex	protein_coding	chr16	31124519	31124520	en	0.364206	1e-21	-5.44	0.285	1	16:29036613-16:31382470
ENSG00000170425	NA	ADORA2B	Brain_Cortex1	gtex	protein_coding	chr17	15829919	15829920	en	0.133002	7.62e-08	4.83	0.266	1	17:15020965-17:16411522
ENSG00000184445	NA	KNTC1	Brain_Cortex1	gtex	protein_coding	chr12	123062298	123062299	en	0.0624303	0.000302603	-3.9	0.208	0	12:122009763-12:124976982
ENSG00000185294	NA	SPPL2C	Brain_Cortex1	gtex	protein_coding	chr17	43925163	43925164	en	0.0675875	0.000166907	-8.91	0.184	1	17:43056905-17:45876022
ENSG00000080854	NA	IGSF9B	Brain_Cortex1	gtex	protein_coding	chr11	133833430	133833431	en	0.0757393	6.51e-05	-3.83	0.168	0	11:133000260-11:134205993
ENSG00000133256	NA	PDE6B	Brain_Cortex1	gtex	protein_coding	chr4	829557	829558	en	0.0724465	9.52e-05	2.7	0.163	0	4:695146-4:1478711
ENSG00000179344	NA	HLA-DQB1	Brain_Cortex1	gtex	protein_coding	chr6	32639094	32639095	en	0.519005	4.22e-34	-3.76	0.138	0	6:31571337-6:32682664
ENSG00000196118	NA	CCDC189	Brain_Cortex1	gtex	protein_coding	chr16	30793318	30793319	en	0.216613	2.05e-12	5.27	0.122	1	16:29036613-16:31382470
ENSG00000274678	NA	AC106886.3	Brain_Cortex1	gtex	lncRNA	chr16	30881166	30881167	en	0.0291125	0.0144456	-5.23	0.106	1	16:29036613-16:31382470
ENSG00000275413	NA	AC002553.2	Brain_Cortex1	gtex	lncRNA	chr17	15913120	15913121	en	0.0304246	0.0123724	-4.62	0.105	1	17:15020965-17:16411522
ENSG00000214941	NA	ZSWIM7	Brain_Cortex1	gtex	protein_coding	chr17	15916261	15916262	en	0.515311	9.21e-34	4.57	0.0821	0	17:15020965-17:16411522
ENSG00000232748	NA	AC135050.1	Brain_Cortex1	gtex	lncRNA	chr16	31121565	31121566	en	0.0256411	0.0218197	5.16	0.071	1	16:29036613-16:31382470
ENSG00000238083	NA	LRRC37A2	Brain_Cortex1	gtex	protein_coding	chr17	44667657	44667658	en	0.730578	1.01e-59	-8.79	0.0614	0	17:43056905-17:45876022
ENSG00000107651	NA	SEC23IP	Brain_Cortex1	gtex	protein_coding	chr10	121667020	121667021	en	0.0225056	0.0317954	3.51	0.0609	0	10:120591693-10:122407323
ENSG00000103496	NA	STX4	Brain_Cortex1	gtex	protein_coding	chr16	31041074	31041075	en	0.0694044	0.000135322	5.13	0.0594	0	16:29036613-16:31382470
ENSG00000230658	NA	KLHL7-DT	Brain_Cortex1	gtex	lncRNA	chr7	23141511	23141512	en	0.610751	1.83e-43	-4.49	0.0488	0	7:22508611-7:23469560
ENSG00000143590	NA	EFNA3	Brain_Cortex1	gtex	protein_coding	chr1	155009216	155009217	en	0.0264934	0.0197109	-3.68	0.0434	0	1:154770403-1:156336133
ENSG00000228696	NA	ARL17B	Brain_Cortex1	gtex	protein_coding	chr17	44373721	44373722	en	0.52117	2.66e-34	-8.74	0.0413	0	17:43056905-17:45876022
ENSG00000167397	NA	VKORC1	Brain_Cortex1	gtex	protein_coding	chr16	31055183	31055184	en	0.104313	2.32e-06	4.9	0.0279	0	16:29036613-16:31382470
ENSG00000145214	NA	DGKQ	Brain_Cortex1	gtex	protein_coding	chr4	931796	931797	en	0.0910993	1.09e-05	-0.781	0.0261	0	4:695146-4:1478711
ENSG00000141027	NA	NCOR1	Brain_Cortex1	gtex	protein_coding	chr17	16008678	16008679	en	0.0462269	0.00196243	4.3	0.0261	0	17:15020965-17:16411522
ENSG00000232759	NA	AC002480.1	Brain_Cortex1	gtex	lncRNA	chr7	22600837	22600838	en	0.0489472	0.00143308	-3.21	0.021	0	7:22508611-7:23469560
ENSG00000049167	NA	ERCC8	Brain_Cortex1	gtex	protein_coding	chr5	60200050	60200051	en	0.046729	0.00185176	-2.68	0.0174	0	5:58524622-5:60935451
ENSG00000197653	NA	DNAH10	Brain_Cortex1	gtex	protein_coding	chr12	124309109	124309110	en	0.0352549	0.00701913	2.99	0.0139	0	12:122009763-12:124976982
ENSG00000099385	NA	BCL7C	Brain_Cortex1	gtex	protein_coding	chr16	30874928	30874929	en	0.0713852	0.000107643	-4.78	0.0137	0	16:29036613-16:31382470
ENSG00000178222	NA	RNF212	Brain_Cortex1	gtex	protein_coding	chr4	1083251	1083252	en	0.103271	2.62e-06	2.67	0.0127	0	4:695146-4:1478711
ENSG00000235560	NA	AC002310.1	Brain_Cortex1	gtex	lncRNA	chr16	30514592	30514593	en	0.0477186	0.00165162	-2.7	0.01	0	16:29036613-16:31382470
ENSG00000204396	NA	VWA7	Brain_Cortex1	gtex	protein_coding	chr6	31738898	31738899	en	0.0350618	0.00717932	-2.92	0.00986	0	6:31571337-6:32682664
ENSG00000260911	NA	AC135050.3	Brain_Cortex1	gtex	lncRNA	chr16	31079257	31079258	en	0.151478	8.05e-09	-4.68	0.00825	0	16:29036613-16:31382470
ENSG00000167394	NA	ZNF668	Brain_Cortex1	gtex	protein_coding	chr16	31090922	31090923	en	0.0326148	0.00956236	4.64	0.00696	0	16:29036613-16:31382470
ENSG00000262766	NA	AC135050.5	Brain_Cortex1	gtex	lncRNA	chr16	31148465	31148466	en	0.0361414	0.0063287	-4.05	0.00693	0	16:29036613-16:31382470
ENSG00000204421	NA	LY6G6C	Brain_Cortex1	gtex	protein_coding	chr6	31463561	31463562	en	0.020214	0.0419976	-2.76	0.00635	0	6:31571337-6:32682664
ENSG00000226816	NA	AC005082.1	Brain_Cortex1	gtex	lncRNA	chr7	23265331	23265332	en	0.0302654	0.0126069	-2.93	0.00623	0	7:22508611-7:23469560
ENSG00000150967	NA	ABCB9	Brain_Cortex1	gtex	protein_coding	chr12	123474922	123474923	en	0.0443487	0.00243879	-2.8	0.0062	0	12:122009763-12:124976982
ENSG00000250091	NA	DNAH10OS	Brain_Cortex1	gtex	lncRNA	chr12	124405566	124405567	en	0.166849	1.2e-09	2.7	0.00581	0	12:122009763-12:124976982
ENSG00000225914	NA	TSBP1-AS1	Brain_Cortex1	gtex	lncRNA	chr6	32202755	32202756	en	0.079867	4.03e-05	2.72	0.00572	0	6:31571337-6:32682664
ENSG00000215375	NA	MYL5	Brain_Cortex1	gtex	protein_coding	chr4	696384	696385	en	0.0817333	3.25e-05	2.49	0.00446	0	4:695146-4:1478711
ENSG00000120088	NA	CRHR1	Brain_Cortex1	gtex	protein_coding	chr17	43895920	43895921	en	0.0192329	0.0473577	-8.45	0.00413	0	17:43056905-17:45876022
ENSG00000272308	NA	AC104113.1	Brain_Cortex1	gtex	lncRNA	chr5	60124774	60124775	en	0.0241252	0.0261619	-4.12	0.00291	0	5:58524622-5:60935451
ENSG00000232810	NA	TNF	Brain_Cortex1	gtex	protein_coding	chr6	31583406	31583407	en	0.0323763	0.0098339	-2.21	0.00264	0	6:31571337-6:32682664
ENSG00000278133	NA	AC135050.6	Brain_Cortex1	gtex	lncRNA	chr16	31126892	31126893	en	0.0465994	0.00187971	4.37	0.00259	0	16:29036613-16:31382470
ENSG00000196126	NA	HLA-DRB1	Brain_Cortex1	gtex	protein_coding	chr6	32517178	32517179	en	0.393496	8.03e-24	0.522	0.00235	0	6:31571337-6:32682664
ENSG00000247775	NA	SNCA-AS1	Brain_Cortex1	gtex	lncRNA	chr4	90764483	90764484	en	0.105405	2.04e-06	1.85	0.00229	0	4:90231746-4:91560677
ENSG00000174943	NA	KCTD13	Brain_Cortex1	gtex	protein_coding	chr16	29938637	29938638	en	0.0356639	0.0066916	-2.01	0.00222	0	16:29036613-16:31382470
ENSG00000118804	NA	STBD1	Brain_Cortex1	gtex	protein_coding	chr4	77246552	77246553	en	0.189085	7.27e-11	2.05	0.00209	0	4:77130707-4:79093979
ENSG00000185829	NA	ARL17A	Brain_Cortex1	gtex	protein_coding	chr17	44363390	44363391	en	0.518643	4.56e-34	-8.36	0.00207	0	17:43056905-17:45876022
ENSG00000177234	NA	LINC01561	Brain_Cortex1	gtex	lncRNA	chr10	122347685	122347686	en	0.0874664	1.67e-05	-2.29	0.00206	0	10:120591693-10:122407323
ENSG00000183605	NA	SFXN4	Brain_Cortex1	gtex	protein_coding	chr10	120915961	120915962	en	0.557151	9.29e-38	2.25	0.00197	0	10:120591693-10:122407323
ENSG00000185619	NA	PCGF3	Brain_Cortex1	gtex	protein_coding	chr4	735220	735221	en	0.276554	5.64e-16	-1.98	0.00184	0	4:695146-4:1478711
ENSG00000168291	NA	PDHB	Brain_Cortex1	gtex	protein_coding	chr3	58415424	58415425	en	0.288342	1.04e-16	-2.23	0.00177	0	3:58157850-3:60272829
ENSG00000162877	NA	PM20D1	Brain_Cortex1	gtex	protein_coding	chr1	205818403	205818404	en	0.104522	2.26e-06	-1.47	0.00161	0	1:204681068-1:205922403
ENSG00000280789	NA	PAGR1	Brain_Cortex1	gtex	protein_coding	chr16	29878280	29878281	en	0.0508982	0.00114405	-2.15	0.00154	0	16:29036613-16:31382470
ENSG00000204290	NA	BTNL2	Brain_Cortex1	gtex	protein_coding	chr6	32352324	32352325	en	0.117991	4.6e-07	2.07	0.00152	0	6:31571337-6:32682664
ENSG00000260083	NA	MIR762HG	Brain_Cortex1	gtex	lncRNA	chr16	30896144	30896145	en	0.0441703	0.00248969	-3.91	0.0015	0	16:29036613-16:31382470
ENSG00000204348	NA	DXO	Brain_Cortex1	gtex	protein_coding	chr6	31936007	31936008	en	0.0613173	0.000344043	2.07	0.00148	0	6:31571337-6:32682664
ENSG00000204420	NA	MPIG6B	Brain_Cortex1	gtex	protein_coding	chr6	31691864	31691865	en	0.0274818	0.0175251	-2.16	0.00146	0	6:31571337-6:32682664
ENSG00000179195	NA	ZNF664	Brain_Cortex1	gtex	protein_coding	chr12	124481902	124481903	en	0.0216908	0.0350906	-1.98	0.00143	0	12:122009763-12:124976982
ENSG00000125459	NA	MSTO1	Brain_Cortex1	gtex	protein_coding	chr1	155622598	155622599	en	0.0318725	0.0104335	0.742	0.00133	0	1:154770403-1:156336133
ENSG00000127419	NA	TMEM175	Brain_Cortex1	gtex	protein_coding	chr4	936688	936689	en	0.137569	4.39e-08	-4.96	0.00133	0	4:695146-4:1478711
ENSG00000145191	NA	EIF2B5	Brain_Cortex1	gtex	protein_coding	chr3	183835204	183835205	en	0.0759692	6.33e-05	-2.03	0.00128	0	3:181511166-3:183769683
ENSG00000138758	NA	SEPTIN11	Brain_Cortex1	gtex	protein_coding	chr4	77937018	77937019	en	0.157492	3.84e-09	1.84	0.0012	0	4:77130707-4:79093979
ENSG00000163749	NA	CCDC158	Brain_Cortex1	gtex	protein_coding	chr4	77306728	77306729	en	0.12853	1.3e-07	-3.97	0.00118	0	4:77130707-4:79093979
ENSG00000188906	NA	LRRK2	Brain_Cortex1	gtex	protein_coding	chr12	40660052	40660053	en	0.0543622	0.000767161	2.03	0.00117	0	12:39227446-12:40816185
ENSG00000103472	NA	RRN3P2	Brain_Cortex1	gtex	lncRNA	chr16	29136668	29136669	en	0.162406	2.09e-09	1.74	0.00117	0	16:29036613-16:31382470
ENSG00000249592	NA	AC139887.2	Brain_Cortex1	gtex	lncRNA	chr4	803647	803648	en	0.0354037	0.00689814	0.883	0.00112	0	4:695146-4:1478711
ENSG00000204410	NA	MSH5	Brain_Cortex1	gtex	protein_coding	chr6	31559666	31559667	en	0.0199864	0.0431818	-1.85	0.00107	0	6:31571337-6:32682664
ENSG00000204287	NA	HLA-DRA	Brain_Cortex1	gtex	protein_coding	chr6	32431321	32431322	en	0.0471922	0.00175521	1.95	0.00106	0	6:31571337-6:32682664
ENSG00000169288	NA	MRPL1	Brain_Cortex1	gtex	protein_coding	chr4	78843658	78843659	en	0.0586285	0.000469087	1.74	0.00104	0	4:77130707-4:79093979
ENSG00000204351	NA	SKIV2L	Brain_Cortex1	gtex	protein_coding	chr6	31933793	31933794	en	0.420348	7.84e-26	1.9	0.00102	0	6:31571337-6:32682664
ENSG00000160685	NA	ZBTB7B	Brain_Cortex1	gtex	protein_coding	chr1	154968564	154968565	en	0.0265964	0.0194707	1.78	0.00102	0	1:154770403-1:156336133
ENSG00000103502	NA	CDIPT	Brain_Cortex1	gtex	protein_coding	chr16	30214979	30214980	en	0.15488	5.3e-09	3.2	0.000995	0	16:29036613-16:31382470
ENSG00000175193	NA	PARL	Brain_Cortex1	gtex	protein_coding	chr3	183578167	183578168	en	0.0213438	0.0365995	2.08	0.000983	0	3:181511166-3:183769683
ENSG00000133065	NA	SLC41A1	Brain_Cortex1	gtex	protein_coding	chr1	205764483	205764484	en	0.076018	6.3e-05	1.84	0.000972	0	1:204681068-1:205922403
ENSG00000204344	NA	STK19	Brain_Cortex1	gtex	protein_coding	chr6	31937510	31937511	en	0.163136	1.91e-09	1.87	0.000967	0	6:31571337-6:32682664
ENSG00000231852	NA	CYP21A2	Brain_Cortex1	gtex	protein_coding	chr6	32011037	32011038	en	0.250992	2e-14	-1.88	0.000959	0	6:31571337-6:32682664
ENSG00000244731	NA	C4A	Brain_Cortex1	gtex	protein_coding	chr6	31963013	31963014	en	0.305992	7.92e-18	-1.87	0.000958	0	6:31571337-6:32682664
ENSG00000139697	NA	SBNO1	Brain_Cortex1	gtex	protein_coding	chr12	124313325	124313326	en	0.0288008	0.0149883	1.95	0.000954	0	12:122009763-12:124976982
ENSG00000137310	NA	TCF19	Brain_Cortex1	gtex	protein_coding	chr6	31574182	31574183	en	0.316977	1.54e-18	1.85	0.000929	0	6:31571337-6:32682664
ENSG00000038945	NA	MSR1	Brain_Cortex1	gtex	protein_coding	chr8	16216676	16216677	en	0.0393279	0.00436634	1.89	0.000891	0	8:15991660-8:17387624
ENSG00000105889	NA	STEAP1B	Brain_Cortex1	gtex	protein_coding	chr7	22494285	22494286	en	0.0471133	0.00177128	1.72	0.000888	0	7:22508611-7:23469560
ENSG00000168993	NA	CPLX1	Brain_Cortex1	gtex	protein_coding	chr4	791862	791863	en	0.0512423	0.00109951	2.48	0.000876	0	4:695146-4:1478711
ENSG00000225190	NA	PLEKHM1	Brain_Cortex1	gtex	protein_coding	chr17	43503493	43503494	en	0.287031	1.26e-16	-8.11	0.000866	0	17:43056905-17:45876022
ENSG00000155975	NA	VPS37A	Brain_Cortex1	gtex	protein_coding	chr8	17138850	17138851	en	0.0494135	0.00135794	-1.84	0.000822	0	8:15991660-8:17387624
ENSG00000163354	NA	DCST2	Brain_Cortex1	gtex	protein_coding	chr1	154993773	154993774	en	0.309765	4.53e-18	-1.74	0.000811	0	1:154770403-1:156336133
ENSG00000076003	NA	MCM6	Brain_Cortex1	gtex	protein_coding	chr2	136628376	136628377	en	0.162042	2.19e-09	0.592	0.000809	0	2:135159453-2:137042794
ENSG00000163689	NA	C3orf67	Brain_Cortex1	gtex	protein_coding	chr3	58869170	58869171	en	0.0405667	0.00378098	-1.82	0.000791	0	3:58157850-3:60272829
ENSG00000139722	NA	VPS37B	Brain_Cortex1	gtex	protein_coding	chr12	123345262	123345263	en	0.0193707	0.0465638	-1.78	0.000779	0	12:122009763-12:124976982
ENSG00000156219	NA	ART3	Brain_Cortex1	gtex	protein_coding	chr4	76985512	76985513	en	0.120254	3.51e-07	-4.07	0.00076	0	4:77130707-4:79093979
ENSG00000178209	NA	PLEC	Brain_Cortex1	gtex	protein_coding	chr8	145012570	145012571	en	0.199582	1.89e-11	-1.78	0.000743	0	8:144236881-8:146303788
ENSG00000111325	NA	OGFOD2	Brain_Cortex1	gtex	protein_coding	chr12	123672987	123672988	en	0.0379925	0.00510028	-1.8	0.000738	0	12:122009763-12:124976982
ENSG00000160803	NA	UBQLN4	Brain_Cortex1	gtex	protein_coding	chr1	156053050	156053051	en	0.0611471	0.000350863	1.95	0.000684	0	1:154770403-1:156336133
ENSG00000198169	NA	ZNF251	Brain_Cortex1	gtex	protein_coding	chr8	145982632	145982633	en	0.169738	8.38e-10	1.73	0.000682	0	8:144236881-8:146303788
ENSG00000251575	NA	C5orf64-AS1	Brain_Cortex1	gtex	lncRNA	chr5	61023802	61023803	en	0.175847	3.89e-10	-1.35	0.000679	0	5:58524622-5:60935451
ENSG00000234283	NA	LINC01731	Brain_Cortex1	gtex	lncRNA	chr1	147778672	147778673	en	0.0409306	0.00362455	1.72	0.000661	0	1:144977648-1:148360712
ENSG00000237541	NA	HLA-DQA2	Brain_Cortex1	gtex	protein_coding	chr6	32653963	32653964	en	0.491881	1.14e-31	-1.18	0.000653	0	6:31571337-6:32682664
ENSG00000260953	NA	AC009093.4	Brain_Cortex1	gtex	lncRNA	chr16	29257699	29257700	en	0.304435	9.96e-18	1.33	0.000631	0	16:29036613-16:31382470
ENSG00000138771	NA	SHROOM3	Brain_Cortex1	gtex	protein_coding	chr4	77536152	77536153	en	0.0297526	0.0133934	-0.759	0.00063	0	4:77130707-4:79093979
ENSG00000204310	NA	AGPAT1	Brain_Cortex1	gtex	protein_coding	chr6	32093077	32093078	en	0.0579013	0.000510107	1.67	0.000628	0	6:31571337-6:32682664
ENSG00000169203	NA	RP11-231C14.4	Brain_Cortex1	gtex	protein_coding	chr16	29974646	29974647	en	0.125923	1.78e-07	-1.76	0.000622	0	16:29036613-16:31382470
ENSG00000121988	NA	ZRANB3	Brain_Cortex1	gtex	protein_coding	chr2	136209187	136209188	en	0.028197	0.0160994	-2.03	0.000622	0	2:135159453-2:137042794
ENSG00000204301	NA	NOTCH4	Brain_Cortex1	gtex	protein_coding	chr6	32204843	32204844	en	0.273391	8.83e-16	-1.65	0.000584	0	6:31571337-6:32682664
ENSG00000168297	NA	PXK	Brain_Cortex1	gtex	protein_coding	chr3	58358525	58358526	en	0.185995	1.08e-10	-1.63	0.000576	0	3:58157850-3:60272829
ENSG00000272360	NA	AC116036.2	Brain_Cortex1	gtex	lncRNA	chr3	58486594	58486595	en	0.0730728	8.86e-05	-1.63	0.000575	0	3:58157850-3:60272829
ENSG00000204394	NA	VARS	Brain_Cortex1	gtex	protein_coding	chr6	31825444	31825445	en	0.0384747	0.0048219	1.59	0.000567	0	6:31571337-6:32682664
ENSG00000159674	NA	SPON2	Brain_Cortex1	gtex	protein_coding	chr4	1158767	1158768	en	0.219754	1.35e-12	-1.32	0.000559	0	4:695146-4:1478711
ENSG00000102882	NA	MAPK3	Brain_Cortex1	gtex	protein_coding	chr16	30141762	30141763	en	0.322288	6.92e-19	-1.03	0.000553	0	16:29036613-16:31382470
ENSG00000178226	NA	PRSS36	Brain_Cortex1	gtex	protein_coding	chr16	31132512	31132513	en	0.38461	3.55e-23	-3.65	0.000544	0	16:29036613-16:31382470
ENSG00000169592	NA	INO80E	Brain_Cortex1	gtex	protein_coding	chr16	30012186	30012187	en	0.210814	4.38e-12	-1.2	0.000541	0	16:29036613-16:31382470
ENSG00000169231	NA	THBS3	Brain_Cortex1	gtex	protein_coding	chr1	155190176	155190177	en	0.192504	4.7e-11	-1.84	0.00053	0	1:154770403-1:156336133
ENSG00000231064	NA	AC234582.1	Brain_Cortex1	gtex	lncRNA	chr1	154847222	154847223	en	0.0303044	0.0125491	-1.36	0.000518	0	1:154770403-1:156336133
ENSG00000163374	NA	YY1AP1	Brain_Cortex1	gtex	protein_coding	chr1	155608388	155608389	en	0.0241295	0.0261484	-0.0857	0.000518	0	1:154770403-1:156336133
ENSG00000250616	NA	AC012645.1	Brain_Cortex1	gtex	lncRNA	chr16	30038402	30038403	en	0.0246962	0.0244304	1.85	0.000509	0	16:29036613-16:31382470
ENSG00000159314	NA	ARHGAP27	Brain_Cortex1	gtex	protein_coding	chr17	43495156	43495157	en	0.130846	9.87e-08	-7.95	0.000506	0	17:43056905-17:45876022
ENSG00000140675	NA	SLC5A2	Brain_Cortex1	gtex	protein_coding	chr16	31107542	31107543	en	0.0198844	0.0437237	-1.99	0.000501	0	16:29036613-16:31382470
ENSG00000114796	NA	KLHL24	Brain_Cortex1	gtex	protein_coding	chr3	183371925	183371926	en	0.164354	1.64e-09	-1.32	0.000468	0	3:181511166-3:183769683
ENSG00000162873	NA	KLHDC8A	Brain_Cortex1	gtex	protein_coding	chr1	205317403	205317404	en	0.0196988	0.0447284	1.75	0.000467	0	1:204681068-1:205922403
ENSG00000163344	NA	PMVK	Brain_Cortex1	gtex	protein_coding	chr1	154869965	154869966	en	0.0335707	0.00854821	1.45	0.000464	0	1:154770403-1:156336133
ENSG00000226979	NA	LTA	Brain_Cortex1	gtex	protein_coding	chr6	31540337	31540338	en	0.0993215	4.17e-06	-1.27	0.000461	0	6:31571337-6:32682664
ENSG00000143622	NA	RIT1	Brain_Cortex1	gtex	protein_coding	chr1	155907702	155907703	en	0.0537937	0.000819148	1.77	0.000461	0	1:154770403-1:156336133
ENSG00000082258	NA	CCNT2	Brain_Cortex1	gtex	protein_coding	chr2	135701684	135701685	en	0.177768	3.06e-10	-2.56	0.000458	0	2:135159453-2:137042794
ENSG00000103549	NA	RNF40	Brain_Cortex1	gtex	protein_coding	chr16	30811011	30811012	en	0.113033	8.29e-07	-2.17	0.000458	0	16:29036613-16:31382470
ENSG00000182307	NA	C8orf33	Brain_Cortex1	gtex	protein_coding	chr8	146264840	146264841	en	0.0220485	0.0336024	1.47	0.000451	0	8:144236881-8:146303788
ENSG00000177628	NA	GBA	Brain_Cortex1	gtex	protein_coding	chr1	155198574	155198575	en	0.0305434	0.0122003	0.486	0.000446	0	1:154770403-1:156336133
ENSG00000160767	NA	FAM189B	Brain_Cortex1	gtex	protein_coding	chr1	155234528	155234529	en	0.046435	0.00191578	-0.409	0.00044	0	1:154770403-1:156336133
ENSG00000116521	NA	SCAMP3	Brain_Cortex1	gtex	protein_coding	chr1	155176148	155176149	en	0.026622	0.0194115	-0.409	0.00044	0	1:154770403-1:156336133
ENSG00000177335	NA	C8orf31	Brain_Cortex1	gtex	lncRNA	chr8	144149390	144149391	en	0.142945	2.28e-08	-1.42	0.000424	0	8:144236881-8:146303788
ENSG00000166582	NA	CENPV	Brain_Cortex1	gtex	protein_coding	chr17	16254311	16254312	en	0.49687	4.15e-32	-0.00858	0.000424	0	17:15020965-17:16411522
ENSG00000138759	NA	FRAS1	Brain_Cortex1	gtex	protein_coding	chr4	79177681	79177682	en	0.0702332	0.000122968	-0.868	0.000423	0	4:77130707-4:79093979
ENSG00000251497	NA	PITPNM2-AS1	Brain_Cortex1	gtex	lncRNA	chr12	123570302	123570303	en	0.0221756	0.0330898	-1.34	0.000422	0	12:122009763-12:124976982
ENSG00000196378	NA	ZNF34	Brain_Cortex1	gtex	protein_coding	chr8	146007398	146007399	en	0.213154	3.23e-12	1.42	0.00042	0	8:144236881-8:146303788
ENSG00000276790	NA	AC068234.3	Brain_Cortex1	gtex	lncRNA	chr17	45415371	45415372	en	0.048191	0.00156388	1.14	0.000414	0	17:43056905-17:45876022
ENSG00000272068	NA	AL365181.2	Brain_Cortex1	gtex	lncRNA	chr1	156607832	156607833	en	0.01967	0.0448866	-0.72	0.000413	0	1:154770403-1:156336133
ENSG00000143537	NA	ADAM15	Brain_Cortex1	gtex	protein_coding	chr1	155061311	155061312	en	0.176669	3.51e-10	-1.11	0.00041	0	1:154770403-1:156336133
ENSG00000274292	NA	AC084018.2	Brain_Cortex1	gtex	lncRNA	chr12	122242999	122243000	en	0.233505	2.16e-13	-1.37	0.000408	0	12:122009763-12:124976982
ENSG00000185803	NA	SLC52A2	Brain_Cortex1	gtex	protein_coding	chr8	145572325	145572326	en	0.0938785	7.89e-06	-1.39	0.000405	0	8:144236881-8:146303788
ENSG00000149923	NA	PPP4C	Brain_Cortex1	gtex	protein_coding	chr16	30109789	30109790	en	0.0413958	0.00343404	-0.688	0.000404	0	16:29036613-16:31382470
ENSG00000196735	NA	HLA-DQA1	Brain_Cortex1	gtex	protein_coding	chr6	32571485	32571486	en	0.174154	4.82e-10	-0.831	0.000391	0	6:31571337-6:32682664
ENSG00000277494	NA	GPIHBP1	Brain_Cortex1	gtex	protein_coding	chr8	144288793	144288794	en	0.194473	3.65e-11	1.35	0.000382	0	8:144236881-8:146303788
ENSG00000162836	NA	ACP6	Brain_Cortex1	gtex	protein_coding	chr1	147121640	147121641	en	0.629643	1.15e-45	1.34	0.000378	0	1:144977648-1:148360712
ENSG00000152253	NA	SPC25	Brain_Cortex1	gtex	protein_coding	chr2	169719944	169719945	en	0.0905088	1.17e-05	1.34	0.000376	0	2:167356254-2:169968112
ENSG00000183336	NA	BOLA2	Brain_Cortex1	gtex	protein_coding	chr16	30314199	30314200	en	0.291171	6.93e-17	0.633	0.00037	0	16:29036613-16:31382470
ENSG00000173171	NA	MTX1	Brain_Cortex1	gtex	protein_coding	chr1	155181237	155181238	en	0.0233403	0.0287505	-1.57	0.000369	0	1:154770403-1:156336133
ENSG00000243364	NA	EFNA4	Brain_Cortex1	gtex	protein_coding	chr1	155040218	155040219	en	0.0702617	0.000122564	-0.583	0.000366	0	1:154770403-1:156336133
ENSG00000203499	NA	IQANK1	Brain_Cortex1	gtex	protein_coding	chr8	144856799	144856800	en	0.15455	5.52e-09	1.3	0.00036	0	8:144236881-8:146303788
ENSG00000281406	NA	BLACAT1	Brain_Cortex1	gtex	protein_coding	chr1	205411733	205411734	en	0.0771633	5.52e-05	-1.29	0.000359	0	1:204681068-1:205922403
ENSG00000169026	NA	SLC49A3	Brain_Cortex1	gtex	protein_coding	chr4	701314	701315	en	0.247607	3.19e-14	0.855	0.000359	0	4:695146-4:1478711
ENSG00000272849	NA	AC084018.1	Brain_Cortex1	gtex	lncRNA	chr12	122196613	122196614	en	0.221421	1.08e-12	-1.29	0.000358	0	12:122009763-12:124976982
ENSG00000225855	NA	RUSC1-AS1	Brain_Cortex1	gtex	lncRNA	chr1	155335325	155335326	en	0.171312	6.88e-10	-0.482	0.000357	0	1:154770403-1:156336133
ENSG00000139725	NA	RHOF	Brain_Cortex1	gtex	protein_coding	chr12	122223527	122223528	en	0.0601201	0.000394971	-1.24	0.000354	0	12:122009763-12:124976982
ENSG00000186834	NA	HEXIM1	Brain_Cortex1	gtex	protein_coding	chr17	43239313	43239314	en	0.0677978	0.000162904	-1.17	0.000353	0	17:43056905-17:45876022
ENSG00000178722	NA	C5orf64	Brain_Cortex1	gtex	lncRNA	chr5	61018691	61018692	en	0.371687	2.98e-22	1.43	0.000351	0	5:58524622-5:60935451
ENSG00000233002	NA	AC005324.1	Brain_Cortex1	gtex	lncRNA	chr17	15645450	15645451	en	0.297704	2.68e-17	-0.8	0.000349	0	17:15020965-17:16411522
ENSG00000150977	NA	RILPL2	Brain_Cortex1	gtex	protein_coding	chr12	123947239	123947240	en	0.0620186	0.000317316	-1.2	0.000348	0	12:122009763-12:124976982
ENSG00000214401	NA	KANSL1-AS1	Brain_Cortex1	gtex	lncRNA	chr17	44292497	44292498	en	0.674248	2.46e-51	-5.59	0.000346	0	17:43056905-17:45876022
ENSG00000110987	NA	BCL7A	Brain_Cortex1	gtex	protein_coding	chr12	122429826	122429827	en	0.0307315	0.0119329	-1.16	0.000343	0	12:122009763-12:124976982
ENSG00000185499	NA	MUC1	Brain_Cortex1	gtex	protein_coding	chr1	155152648	155152649	en	0.0789765	4.47e-05	1.44	0.000339	0	1:154770403-1:156336133
ENSG00000013364	NA	MVP	Brain_Cortex1	gtex	protein_coding	chr16	29847015	29847016	en	0.0762302	6.15e-05	0.557	0.000336	0	16:29036613-16:31382470
ENSG00000184110	NA	EIF3C	Brain_Cortex1	gtex	protein_coding	chr16	28693079	28693080	en	0.0930676	8.68e-06	-0.914	0.000333	0	16:29036613-16:31382470
ENSG00000238045	NA	AC009133.1	Brain_Cortex1	gtex	lncRNA	chr16	29844315	29844316	en	0.0336264	0.00849258	0.536	0.000329	0	16:29036613-16:31382470
ENSG00000163945	NA	UVSSA	Brain_Cortex1	gtex	protein_coding	chr4	1132460	1132461	en	0.304609	9.71e-18	-0.367	0.000328	0	4:695146-4:1478711
ENSG00000114770	NA	ABCC5	Brain_Cortex1	gtex	protein_coding	chr3	183686665	183686666	en	0.151898	7.64e-09	0.967	0.000327	0	3:181511166-3:183769683
ENSG00000108474	NA	PIGL	Brain_Cortex1	gtex	protein_coding	chr17	16231416	16231417	en	0.0830569	2.79e-05	2.15	0.000324	0	17:15020965-17:16411522
ENSG00000278811	NA	LINC00624	Brain_Cortex1	gtex	lncRNA	chr1	146721731	146721732	en	0.116358	5.58e-07	1.22	0.000323	0	1:144977648-1:148360712
ENSG00000145217	NA	SLC26A1	Brain_Cortex1	gtex	protein_coding	chr4	946251	946252	en	0.429411	1.57e-26	4.15	0.000322	0	4:695146-4:1478711
ENSG00000224043	NA	CCNT2-AS1	Brain_Cortex1	gtex	lncRNA	chr2	135617096	135617097	en	0.0297737	0.01336	2.16	0.000317	0	2:135159453-2:137042794
ENSG00000180834	NA	MAP6D1	Brain_Cortex1	gtex	protein_coding	chr3	183542917	183542918	en	0.0468502	0.00182599	1.05	0.000312	0	3:181511166-3:183769683
ENSG00000069275	NA	NUCKS1	Brain_Cortex1	gtex	protein_coding	chr1	205716645	205716646	en	0.030514	0.0122427	-3.73	0.000312	0	1:204681068-1:205922403
ENSG00000174529	NA	TMEM81	Brain_Cortex1	gtex	protein_coding	chr1	205044386	205044387	en	0.160035	2.8e-09	1.27	0.000307	0	1:204681068-1:205922403
ENSG00000082641	NA	NFE2L1	Brain_Cortex1	gtex	protein_coding	chr17	46217279	46217280	en	0.0393851	0.00433737	-1.56	0.000306	0	17:43056905-17:45876022
ENSG00000204308	NA	RNF5	Brain_Cortex1	gtex	protein_coding	chr6	32134692	32134693	en	0.101811	3.12e-06	-1.06	0.000306	0	6:31571337-6:32682664
ENSG00000223534	NA	HLA-DQB1-AS1	Brain_Cortex1	gtex	lncRNA	chr6	32609333	32609334	en	0.369091	4.54e-22	-1.09	0.000304	0	6:31571337-6:32682664
ENSG00000180900	NA	SCRIB	Brain_Cortex1	gtex	protein_coding	chr8	144892256	144892257	en	0.0456128	0.00210689	1.16	0.000304	0	8:144236881-8:146303788
ENSG00000149922	NA	TBX6	Brain_Cortex1	gtex	protein_coding	chr16	30114959	30114960	en	0.27539	6.65e-16	1.34	0.000304	0	16:29036613-16:31382470
ENSG00000163463	NA	KRTCAP2	Brain_Cortex1	gtex	protein_coding	chr1	155159353	155159354	en	0.0298119	0.0132998	-0.131	0.000302	0	1:154770403-1:156336133
ENSG00000237188	NA	AC242426.2	Brain_Cortex1	gtex	lncRNA	chr1	146686580	146686581	en	0.147498	1.31e-08	1.16	0.000301	0	1:144977648-1:148360712
ENSG00000143630	NA	HCN3	Brain_Cortex1	gtex	protein_coding	chr1	155304806	155304807	en	0.0295373	0.0137382	0.982	0.000301	0	1:154770403-1:156336133
ENSG00000139719	NA	VPS33A	Brain_Cortex1	gtex	protein_coding	chr12	122716211	122716212	en	0.0509429	0.00113816	-1.13	0.000301	0	12:122009763-12:124976982
ENSG00000122591	NA	FAM126A	Brain_Cortex1	gtex	protein_coding	chr7	22969690	22969691	en	0.0214055	0.0363265	-0.636	0.000299	0	7:22508611-7:23469560
ENSG00000078579	NA	FGF20	Brain_Cortex1	gtex	protein_coding	chr8	16847913	16847914	en	0.0298212	0.0132853	-1.15	0.000298	0	8:15991660-8:17387624
ENSG00000161016	NA	RPL8	Brain_Cortex1	gtex	protein_coding	chr8	146014113	146014114	en	0.171733	6.53e-10	-1.14	0.000298	0	8:144236881-8:146303788
ENSG00000183955	NA	KMT5A	Brain_Cortex1	gtex	protein_coding	chr12	123888740	123888741	en	0.080061	3.94e-05	1.05	0.000297	0	12:122009763-12:124976982
ENSG00000180096	NA	SEPTIN1	Brain_Cortex1	gtex	protein_coding	chr16	30418980	30418981	en	0.249438	2.48e-14	-0.745	0.000295	0	16:29036613-16:31382470
ENSG00000138750	NA	NUP54	Brain_Cortex1	gtex	protein_coding	chr4	77074567	77074568	en	0.300072	1.89e-17	-2.1	0.000294	0	4:77130707-4:79093979
ENSG00000133069	NA	TMCC2	Brain_Cortex1	gtex	protein_coding	chr1	205489019	205489020	en	0.065921	0.000202302	1.19	0.000293	0	1:204681068-1:205922403
ENSG00000241106	NA	HLA-DOB	Brain_Cortex1	gtex	protein_coding	chr6	32771913	32771914	en	0.714475	3.7e-57	1.07	0.000292	0	6:31571337-6:32682664
ENSG00000229809	NA	ZNF688	Brain_Cortex1	gtex	protein_coding	chr16	30582656	30582657	en	0.0320067	0.0102703	-0.0169	0.000291	0	16:29036613-16:31382470
ENSG00000131778	NA	CHD1L	Brain_Cortex1	gtex	protein_coding	chr1	146720992	146720993	en	0.222503	9.39e-13	1.12	0.000288	0	1:144977648-1:148360712
ENSG00000275371	NA	AC012645.4	Brain_Cortex1	gtex	lncRNA	chr16	30117774	30117775	en	0.230596	3.19e-13	-0.804	0.000286	0	16:29036613-16:31382470
ENSG00000237765	NA	FAM200B	Brain_Cortex1	gtex	protein_coding	chr4	15697388	15697389	en	0.184471	1.31e-10	3.84	0.000284	0	4:15147446-4:15926136
ENSG00000177238	NA	TRIM72	Brain_Cortex1	gtex	protein_coding	chr16	31223334	31223335	en	0.20542	8.86e-12	1.65	0.000284	0	16:29036613-16:31382470
ENSG00000143603	NA	KCNN3	Brain_Cortex1	gtex	protein_coding	chr1	154965020	154965021	en	0.0625015	0.000300128	-1.17	0.000282	0	1:154770403-1:156336133
ENSG00000136448	NA	NMT1	Brain_Cortex1	gtex	protein_coding	chr17	43148411	43148412	en	0.0631756	0.000277681	2.24	0.000282	0	17:43056905-17:45876022
ENSG00000213722	NA	DDAH2	Brain_Cortex1	gtex	protein_coding	chr6	31683989	31683990	en	0.0966856	5.68e-06	0.425	0.000279	0	6:31571337-6:32682664
ENSG00000188026	NA	RILPL1	Brain_Cortex1	gtex	protein_coding	chr12	123996892	123996893	en	0.0313068	0.0111514	-0.906	0.000279	0	12:122009763-12:124976982
ENSG00000073969	NA	NSF	Brain_Cortex1	gtex	protein_coding	chr17	44199358	44199359	en	0.0960382	6.13e-06	0.347	0.000274	0	17:43056905-17:45876022
ENSG00000175106	NA	TVP23C	Brain_Cortex1	gtex	protein_coding	chr17	15418440	15418441	en	0.0785295	4.71e-05	-0.788	0.000274	0	17:15020965-17:16411522
ENSG00000156886	NA	ITGAD	Brain_Cortex1	gtex	protein_coding	chr16	31212047	31212048	en	0.136999	4.7e-08	0.7	0.000273	0	16:29036613-16:31382470
ENSG00000198952	NA	SMG5	Brain_Cortex1	gtex	protein_coding	chr1	156265976	156265977	en	0.067684	0.000165058	0.598	0.000273	0	1:154770403-1:156336133
ENSG00000090238	NA	YPEL3	Brain_Cortex1	gtex	protein_coding	chr16	30071468	30071469	en	0.151926	7.62e-09	-1.11	0.000272	0	16:29036613-16:31382470
ENSG00000175061	NA	SNHG29	Brain_Cortex1	gtex	lncRNA	chr17	16366099	16366100	en	0.0446055	0.00236737	-0.29	0.000271	0	17:15020965-17:16411522
ENSG00000169957	NA	ZNF768	Brain_Cortex1	gtex	protein_coding	chr16	30570613	30570614	en	0.0224491	0.0320134	-1.39	0.000271	0	16:29036613-16:31382470
ENSG00000138764	NA	CCNG2	Brain_Cortex1	gtex	protein_coding	chr4	78048283	78048284	en	0.0472069	0.00175223	0.49	0.00027	0	4:77130707-4:79093979
ENSG00000169221	NA	TBC1D10B	Brain_Cortex1	gtex	protein_coding	chr16	30363187	30363188	en	0.0339793	0.00814874	0.416	0.000269	0	16:29036613-16:31382470
ENSG00000163092	NA	XIRP2	Brain_Cortex1	gtex	protein_coding	chr2	168108512	168108513	en	0.0388585	0.00461133	-1.05	0.000269	0	2:167356254-2:169968112
ENSG00000214946	NA	TBC1D26	Brain_Cortex1	gtex	protein_coding	chr17	15648042	15648043	en	0.491709	1.17e-31	0.497	0.000268	0	17:15020965-17:16411522
ENSG00000169217	NA	CD2BP2	Brain_Cortex1	gtex	protein_coding	chr16	30395277	30395278	en	0.0922921	9.5e-06	0.413	0.000264	0	16:29036613-16:31382470
ENSG00000196683	NA	TOMM7	Brain_Cortex1	gtex	protein_coding	chr7	22876448	22876449	en	0.429602	1.52e-26	-0.629	0.000264	0	7:22508611-7:23469560
ENSG00000260304	NA	AC009088.2	Brain_Cortex1	gtex	lncRNA	chr16	31193250	31193251	en	0.103949	2.42e-06	1.07	0.000262	0	16:29036613-16:31382470
ENSG00000140678	NA	ITGAX	Brain_Cortex1	gtex	protein_coding	chr16	31350943	31350944	en	0.0275948	0.0172914	1.76	0.000262	0	16:29036613-16:31382470
ENSG00000203805	NA	PLPP4	Brain_Cortex1	gtex	protein_coding	chr10	122292039	122292040	en	0.033671	0.00844832	-0.992	0.000262	0	10:120591693-10:122407323
ENSG00000228649	NA	SNHG26	Brain_Cortex1	gtex	lncRNA	chr7	22895759	22895760	en	0.0397752	0.00414507	-0.642	0.000261	0	7:22508611-7:23469560
ENSG00000188735	NA	TMEM120B	Brain_Cortex1	gtex	protein_coding	chr12	122207179	122207180	en	0.019012	0.0486603	0.873	0.000261	0	12:122009763-12:124976982
[truncated: 5,809 more rows]
