# Supplementary material for: Joint analysis of proteome, transcriptome, and multi-trait analysis to identify novel Parkinson’s disease risk genes
Source: Aging (Albany NY). 2024 Jan 17;16(2):1555–80. doi: 10.18632/aging.205444 (PMC10866412; doi:10.18632/aging.205444)
Supplement: Supplementary Table 14 [file aging-16-205444-s013.xlsx]

## Sheet: Sheet1
Supplementary Table 14. Fine-mapping results of PD GWAS based on TWAS-identified genes for PD risk and the fourteen genes have not been previously identified in TWAS.
Region	Gene name	Type	PD TWAS					FOCUS
			Model	R2	Number	effect_size	P-value	PIP	TWAS-Z	Region
					of SNPs
					in model
1q22	GBA	protein	Spleen	0.108994	20	0.364957	1.29e-08	1	6.13	1:154770403-1:156336133
2q24.3	STK39	protein	Brain_Caudate_basal_ganglia	0.065668	5	-0.724854	1.13e-07	0.98	-5.09	2:167356254-2:169968112
		protein	Brain_Nucleus_accumbens_basal_ganglia	0.085119	10	-0.586956	1.98e-07	0.928	-4.82	2:167356254-2:169968112
		protein	Brain_Putamen_basal_ganglia	0.08338	9	-0.476338	2.91e-07	0.958	-4.94	2:167356254-2:169968112
4p15.32	FAM200B	protein	Brain_Cerebellar_Hemisphere	0.38673	22	0.156593	2.06e-09	1	6.06	4:15147446-4:15926136
4p16.3	DGKQ	protein	Brain_Amygdala	0.047291	3	-0.837567	4.68e-08	1	-5.21	4:695146-4:1478711
		protein	Brain_Hippocampus	0.156482	4	-0.754866	4.68e-08	0.997	-5.21	4:695146-4:1478711
		protein	Brain_Spinal_cord_cervical_c-1	0.170999	5	-0.371962	4.3e-12	1	-5.25	4:695146-4:1478711
		protein	Brain_Substantia_nigra	0.091839	2	-0.756786	6.1e-12	1	-5.21	4:695146-4:1478711
		protein	Colon_Sigmoid	0.281221	19	-0.197814	9.37e-13	1	-7.26	4:695146-4:1478711
		protein	Colon_Transverse	0.159067	29	-0.195958	1.09e-11	1	-7.31	4:695146-4:1478711
		protein	Liver	0.169699	18	-0.205758	8.32e-13	1	-7.18	4:695146-4:1478711
		protein	Pancreas	0.354009	20	-0.208513	1.25e-12	1	-6.76	4:695146-4:1478711
		protein	Pituitary	0.18171	21	-0.235694	8.91e-13	1	-6.14	4:695146-4:1478711
		protein	Spleen	0.607755	30	-0.153289	3.89e-12	1	-8.19	4:695146-4:1478711
		protein	Whole_Blood	0.627778	38	-0.123986	6.02732e-10	1	-7.19	4:695146-4:1478711
4q21.1	CDKL2	protein	Stomach	0.012023	6	0.820589	3.92e-09	0.934	5.93	4:77130707-4:79093979
5q12.1	NDUFAF2	protein	Brain_Cortex	0.069305	4	0.629841	1.11e-08	0.996	5.5	5:58524622-5:60935451
		protein	Brain_Hippocampus	0.066241	3	0.617028	1.3e-08	0.997	5.46	5:58524622-5:60935451
		protein	Brain_Nucleus_accumbens_basal_ganglia	0.028327	2	0.619524	6.97e-09	0.999	5.6	5:58524622-5:60935451
		protein	Brain_Putamen_basal_ganglia	0.062233	3	0.686194	4.95e-09	0.999	5.68	5:58524622-5:60935451
		protein	Brain_Substantia_nigra	0.042041	2	1.53102	2.15e-08	0.994	5.34	5:58524622-5:60935451
12q24.31	CCDC62	protein	Brain_Cerebellar_Hemisphere	0.098831	5	0.628081	2.1e-08	0.999	5.76	12:122009763-12:124976982
17p12	TTC19	protein	Whole_Blood	0.171984	2	-0.374157	3.125e-07	0.924	-4.88	17:15020965-17:16411522
17q21.31	ARHGAP27	protein	Brain_Caudate_basal_ganglia	0.122012	11	-0.68159	1.1e-19	1	-9.26	17:43056905-17:45876022
17q21.31	CRHR1	protein	Colon_Sigmoid	0.035351	9	-1.5283	1.5e-21	0.971	-9.38	17:43056905-17:45876022
17q21.31-q21.32	WNT3	protein	Colon_Transverse	0.177168	13	-0.43806	8.5e-20	0.962	-8.51	17:43056905-17:45876022
		protein	Whole_Blood	0.019671	11	-0.40728	5.73298e-16	1	-6.89	17:43056905-17:45876022
3q27.1	MCCC1-AS1	lncRNA	Brain_Cerebellar_Hemisphere	0.088035	7	-0.39622	2.36e-07	0.937	-4.1	3:181511166-3:183769683
		lncRNA	Brain_Cortex	0.051173	5	-0.555518	5.8e-08	0.963	-4.71	3:181511166-3:183769683
		lncRNA	Brain_Frontal_Cortex_BA9	0.053678	7	-0.52585	8.33e-08	0.995	-4.57	3:181511166-3:183769683
		lncRNA	Brain_Nucleus_accumbens_basal_ganglia	0.062205	7	-0.522778	8.67e-08	0.947	-4.56	3:181511166-3:183769683
17q21.31	CR936218.2	lncRNA	Liver	0.455667	11	0.266749	7.73e-21	1	8.21	17:43056905-17:45876022
17q21.31	CR936218.1	lncRNA	Stomach	0.039398	6	3.66297	3.87e-20	0.996	9.03	17:43056905-17:45876022
