# Supplementary material for: Joint analysis of proteome, transcriptome, and multi-trait analysis to identify novel Parkinson’s disease risk genes
Source: Aging (Albany NY). 2024 Jan 17;16(2):1555–80. doi: 10.18632/aging.205444 (PMC10866412; doi:10.18632/aging.205444)
Supplement: Supplementary Table 15 [file aging-16-205444-s014.xlsx]

## Sheet: Sheet1
Supplementary Table 15. Full results of TWAS (using SNP expression weights from JTI) for PD risk across 22 tissues(PD MTAG).
gene	gene_name	zscore	effect_size	pvalue	var_g	pred_perf_r2	pred_perf_pval	pred_perf_qval	n_snps_used
ENSG00000232748	AC135050.1	6.35355	7.90236	2.10405e-10	1.30353e-06	0.0473404	0.0132524	0.0520244	1	Brain_Amygdala
ENSG00000260911	AC135050.3	-5.30063	-0.0494009	1.15406e-07	0.02556	0.0858583	0.000751932	0.00451577	2	Brain_Amygdala
ENSG00000228696	ARL17B	-9.21111	-4.13771	3.22764e-20	9.53727e-06	0.35615	8.41954e-14	4.1973e-12	1	Brain_Amygdala
ENSG00000196118	CCDC189	5.4452	0.096639	5.17462e-08	0.00791719	0.109317	0.000129772	0.000974905	1	Brain_Amygdala
ENSG00000004468	CD38	-7.46541	-0.0587021	8.30407e-14	0.0339879	0.0780681	0.00134278	0.00743714	2	Brain_Amygdala
ENSG00000169242	EFNA1	4.55807	0.216987	5.16256e-06	0.000894558	0.0558726	0.00699908	0.0303471	1	Brain_Amygdala
ENSG00000099377	HSD3B7	-5.98346	-0.239236	2.18442e-09	0.00125984	0.0725123	0.00202946	0.0105661	2	Brain_Amygdala
ENSG00000120071	KANSL1	-6.91867	-0.0818433	4.55892e-12	0.0149407	0.284866	7.36843e-11	2.11369e-09	4	Brain_Amygdala
ENSG00000214401	KANSL1-AS1	-9.29406	-0.0343133	1.48517e-20	0.146899	0.552675	6.16385e-24	1.68799e-21	11	Brain_Amygdala
ENSG00000103510	KAT8	-4.92285	-0.0291641	8.52911e-07	0.0623441	0.157045	3.33617e-06	3.76699e-05	2	Brain_Amygdala
ENSG00000230658	KLHL7-DT	-4.98062	-0.0127615	6.338e-07	0.310359	0.494811	1.47204e-20	2.14428e-18	10	Brain_Amygdala
ENSG00000264589	MAPT-AS1	5.46953	0.0605847	4.51242e-08	0.0156423	0.110245	0.000120996	0.000917703	7	Brain_Amygdala
ENSG00000138722	MMRN1	9.65025	0.0877334	4.90379e-22	0.0241343	0.322686	2.20378e-12	8.17029e-11	6	Brain_Amygdala
ENSG00000141027	NCOR1	5.6452	0.0685481	1.64988e-08	0.0135302	0.0546965	0.00764112	0.0326416	7	Brain_Amygdala
ENSG00000136243	NUPL2	5.07269	0.0240081	3.92232e-07	0.0878428	0.158159	3.05735e-06	3.48143e-05	2	Brain_Amygdala
ENSG00000225190	PLEKHM1	-8.24043	-0.0655769	1.71597e-16	0.0281772	0.170615	1.14582e-06	1.43412e-05	2	Brain_Amygdala
ENSG00000178226	PRSS36	-5.09288	-0.0182199	3.52656e-07	0.17089	0.158715	2.9271e-06	3.35302e-05	2	Brain_Amygdala
ENSG00000151006	PRSS53	5.05221	0.226379	4.36736e-07	0.00106181	0.0362955	0.0305714	0.104009	3	Brain_Amygdala
ENSG00000117280	RAB29	6.42436	0.0276492	1.32427e-10	0.120549	0.0502632	0.010644	0.0430132	6	Brain_Amygdala
ENSG00000103549	RNF40	-4.96162	-0.196745	6.99091e-07	0.00136281	0.0689848	0.0026378	0.0132367	1	Brain_Amygdala
ENSG00000145335	SNCA	-5.55445	-0.0951275	2.78494e-08	0.00642673	0.0498553	0.0109742	0.0441612	4	Brain_Amygdala
ENSG00000103496	STX4	5.67874	0.110746	1.3569e-08	0.00583796	0.0695574	0.00252789	0.0127349	1	Brain_Amygdala
ENSG00000127419	TMEM175	-6.85462	-0.0638827	7.15038e-12	0.0195874	0.0888786	0.000600328	0.0036983	2	Brain_Amygdala
ENSG00000011295	TTC19	-5.287	-0.0475378	1.24337e-07	0.0254938	0.144122	9.11718e-06	9.30705e-05	2	Brain_Amygdala
ENSG00000214941	ZSWIM7	5.2253	0.0308902	1.73875e-07	0.0584608	0.266058	3.95689e-10	9.80345e-09	6	Brain_Amygdala
ENSG00000275413	AC002553.2	-5.2744	-0.79257	1.3319e-07	9.17502e-05	0.0371628	0.0193185	0.0589698	1	Brain_Anterior_cingulate_cortex_BA24
ENSG00000274678	AC106886.3	-5.74882	-0.265196	8.98662e-09	0.000943794	0.0308852	0.0332405	0.0938925	3	Brain_Anterior_cingulate_cortex_BA24
ENSG00000232748	AC135050.1	4.96934	0.214799	6.71812e-07	0.00116059	0.06181	0.00239421	0.0095949	3	Brain_Anterior_cingulate_cortex_BA24
ENSG00000260911	AC135050.3	-5.53929	-0.0967292	3.03704e-08	0.00728588	0.146948	1.64778e-06	1.38199e-05	2	Brain_Anterior_cingulate_cortex_BA24
ENSG00000170425	ADORA2B	5.25761	0.036389	1.45938e-07	0.0429627	0.110703	3.82973e-05	0.000242273	6	Brain_Anterior_cingulate_cortex_BA24
ENSG00000228696	ARL17B	-9.21111	-0.225895	3.22764e-20	0.00319985	0.415774	1.21378e-18	6.69974e-17	1	Brain_Anterior_cingulate_cortex_BA24
ENSG00000196118	CCDC189	6.08189	0.0427632	1.18774e-09	0.0470905	0.0914856	0.000196479	0.00105717	6	Brain_Anterior_cingulate_cortex_BA24
ENSG00000004468	CD38	-7.40565	-0.0459645	1.30505e-13	0.0552993	0.104741	6.37332e-05	0.00038405	5	Brain_Anterior_cingulate_cortex_BA24
ENSG00000145214	DGKQ	5.87899	0.173791	4.12776e-09	0.00215844	0.160538	4.93749e-07	4.6774e-06	6	Brain_Anterior_cingulate_cortex_BA24
ENSG00000169242	EFNA1	4.80229	0.0405155	1.56861e-06	0.0284727	0.0274835	0.0447772	0.121378	4	Brain_Anterior_cingulate_cortex_BA24
ENSG00000178950	GAK	6.34454	0.268764	2.23092e-10	0.00102431	0.112279	3.34601e-05	0.000214957	2	Brain_Anterior_cingulate_cortex_BA24
ENSG00000127415	IDUA	-7.93729	-0.214343	2.0664e-15	0.00255823	0.0341253	0.0250955	0.0737544	3	Brain_Anterior_cingulate_cortex_BA24
ENSG00000214401	KANSL1-AS1	-9.41989	-0.0676195	4.51556e-21	0.0370741	0.585371	1.64089e-29	4.14205e-27	6	Brain_Anterior_cingulate_cortex_BA24
ENSG00000103510	KAT8	-4.64901	-0.0218871	3.33531e-06	0.103754	0.180977	7.81943e-08	8.73001e-07	4	Brain_Anterior_cingulate_cortex_BA24
ENSG00000230658	KLHL7-DT	-5.26554	-0.013226	1.39776e-07	0.320656	0.589979	7.26915e-30	1.97979e-27	5	Brain_Anterior_cingulate_cortex_BA24
ENSG00000176681	LRRC37A	-9.21111	-0.0341893	3.22764e-20	0.139689	0.610701	1.66457e-31	6.26451e-29	1	Brain_Anterior_cingulate_cortex_BA24
ENSG00000138722	MMRN1	7.29503	0.0221093	2.98595e-13	0.286952	0.278918	6.22795e-12	1.38318e-10	33	Brain_Anterior_cingulate_cortex_BA24
ENSG00000069275	NUCKS1	-4.63697	-0.0358041	3.53556e-06	0.0345695	0.095335	0.000141803	0.000789877	10	Brain_Anterior_cingulate_cortex_BA24
ENSG00000136243	NUPL2	5.1538	0.0220437	2.55265e-07	0.10616	0.340283	8.96312e-15	2.93556e-13	5	Brain_Anterior_cingulate_cortex_BA24
ENSG00000225190	PLEKHM1	-8.29181	-0.0966036	1.11539e-16	0.0131284	0.198664	1.53753e-08	1.9609e-07	2	Brain_Anterior_cingulate_cortex_BA24
ENSG00000156858	PRR14	5.72864	0.207852	1.01239e-08	0.00185017	0.0607073	0.00262697	0.0104108	2	Brain_Anterior_cingulate_cortex_BA24
ENSG00000117280	RAB29	7.0186	0.0481682	2.2411e-12	0.0462147	0.116051	2.42095e-05	0.000160304	7	Brain_Anterior_cingulate_cortex_BA24
ENSG00000107295	SH3GL2	4.66724	0.0624055	3.05277e-06	0.0108379	0.0844358	0.000356497	0.00179847	3	Brain_Anterior_cingulate_cortex_BA24
ENSG00000103496	STX4	5.67874	0.118627	1.3569e-08	0.00508804	0.151061	1.14604e-06	9.95462e-06	1	Brain_Anterior_cingulate_cortex_BA24
ENSG00000011295	TTC19	-5.33794	-0.0285927	9.4007e-08	0.071906	0.0345221	0.0242499	0.0715639	3	Brain_Anterior_cingulate_cortex_BA24
ENSG00000214941	ZSWIM7	5.54997	0.0352617	2.85725e-08	0.0507856	0.544613	1.52281e-26	2.21976e-24	8	Brain_Anterior_cingulate_cortex_BA24
ENSG00000275413	AC002553.2	-5.51058	-0.286956	3.57657e-08	0.000758953	0.0224041	0.037244	0.0794006	2	Brain_Caudate_basal_ganglia
ENSG00000275263	AC135048.3	6.20579	0.138011	5.44232e-10	0.00428903	0.0445218	0.00314452	0.00892051	2	Brain_Caudate_basal_ganglia
ENSG00000170425	ADORA2B	5.71849	0.0813932	1.07476e-08	0.00982369	0.086332	3.20778e-05	0.000140194	8	Brain_Caudate_basal_ganglia
ENSG00000159314	ARHGAP27	-9.27668	-0.0724383	1.74837e-20	0.0319041	0.122012	5.97811e-07	3.56162e-06	8	Brain_Caudate_basal_ganglia
ENSG00000185829	ARL17A	-7.66263	-0.0447355	1.82158e-14	0.0613877	0.379656	1.14598e-21	4.07673e-20	9	Brain_Caudate_basal_ganglia
ENSG00000196118	CCDC189	6.05341	0.0415869	1.41815e-09	0.0494757	0.182368	5.31242e-10	5.01964e-09	6	Brain_Caudate_basal_ganglia
ENSG00000004468	CD38	-7.59397	-0.0404053	3.1024e-14	0.0748528	0.204845	3.4601e-11	3.81892e-10	5	Brain_Caudate_basal_ganglia
ENSG00000120088	CRHR1	5.92926	0.0334255	3.0431e-09	0.0665357	0.108623	2.69709e-06	1.43492e-05	16	Brain_Caudate_basal_ganglia
ENSG00000169242	EFNA1	4.55807	0.0522997	5.16256e-06	0.0153985	0.143826	4.94673e-08	3.48155e-07	1	Brain_Caudate_basal_ganglia
ENSG00000099377	HSD3B7	-5.97924	-0.253398	2.24182e-09	0.00112136	0.0576822	0.000743306	0.00243325	2	Brain_Caudate_basal_ganglia
ENSG00000120071	KANSL1	-7.11124	-0.0642565	1.15006e-12	0.02483	0.274658	4.43333e-15	7.80581e-14	12	Brain_Caudate_basal_ganglia
ENSG00000214401	KANSL1-AS1	-9.21929	-0.0305414	2.99086e-20	0.186543	0.647089	2.68435e-45	1.93292e-42	15	Brain_Caudate_basal_ganglia
ENSG00000103510	KAT8	-4.95022	-0.0257769	7.41288e-07	0.0787414	0.204582	3.57381e-11	3.94025e-10	5	Brain_Caudate_basal_ganglia
ENSG00000122550	KLHL7	-4.71279	-0.0530611	2.44351e-06	0.016441	0.0989166	7.9632e-06	3.90713e-05	14	Brain_Caudate_basal_ganglia
ENSG00000230658	KLHL7-DT	-5.11225	-0.0115036	3.18339e-07	0.403807	0.583132	2.48397e-38	6.40375e-36	10	Brain_Caudate_basal_ganglia
ENSG00000176681	LRRC37A	-9.21111	-0.0368226	3.22764e-20	0.120425	0.594686	1.65583e-39	4.87e-37	1	Brain_Caudate_basal_ganglia
ENSG00000264589	MAPT-AS1	6.92386	0.0235175	4.39502e-12	0.166755	0.221916	4.14613e-12	5.17201e-11	19	Brain_Caudate_basal_ganglia
ENSG00000279685	MAPT-IT1	-9.3881	-0.105766	6.10943e-21	0.0148681	0.069163	0.000211588	0.000778043	6	Brain_Caudate_basal_ganglia
ENSG00000138722	MMRN1	7.93953	0.027589	2.02942e-15	0.214153	0.198752	7.30411e-11	7.74236e-10	11	Brain_Caudate_basal_ganglia
ENSG00000141027	NCOR1	5.4892	0.0545513	4.03759e-08	0.0203624	0.0322784	0.0121878	0.0294533	7	Brain_Caudate_basal_ganglia
ENSG00000073969	NSF	-4.60715	-0.279805	4.08222e-06	0.000500336	0.0332846	0.0108938	0.026747	3	Brain_Caudate_basal_ganglia
ENSG00000136243	NUPL2	5.25171	0.034265	1.50697e-07	0.0452022	0.295426	2.63197e-16	5.29997e-15	8	Brain_Caudate_basal_ganglia
ENSG00000225190	PLEKHM1	-8.2467	-0.0645493	1.62827e-16	0.0293482	0.206555	2.80277e-11	3.13652e-10	3	Brain_Caudate_basal_ganglia
ENSG00000178226	PRSS36	-4.83465	-0.0161461	1.33377e-06	0.193815	0.378862	1.2971e-21	4.60648e-20	4	Brain_Caudate_basal_ganglia
ENSG00000117280	RAB29	6.37283	0.021404	1.85572e-10	0.198256	0.198474	7.55694e-11	7.99008e-10	14	Brain_Caudate_basal_ganglia
ENSG00000103549	RNF40	-5.03993	-0.0277953	4.65697e-07	0.0707395	0.150054	2.40611e-08	1.77668e-07	7	Brain_Caudate_basal_ganglia
ENSG00000145335	SNCA	-7.74805	-0.16407	9.33109e-15	0.00421727	0.0385143	0.00609712	0.0160595	2	Brain_Caudate_basal_ganglia
ENSG00000198648	STK39	-5.25088	-0.0829991	1.5137e-07	0.0077232	0.0656685	0.000310217	0.00109926	4	Brain_Caudate_basal_ganglia
ENSG00000103496	STX4	5.77414	0.0732012	7.73461e-09	0.0137422	0.0420942	0.00410737	0.0113079	2	Brain_Caudate_basal_ganglia
ENSG00000127419	TMEM175	-4.97152	-0.0347233	6.64306e-07	0.0377439	0.0795598	6.762e-05	0.000276059	6	Brain_Caudate_basal_ganglia
ENSG00000011295	TTC19	-4.81659	-0.0284786	1.46029e-06	0.0580408	0.229597	1.57387e-12	2.07092e-11	8	Brain_Caudate_basal_ganglia
ENSG00000167395	ZNF646	-5.67874	-0.362945	1.3569e-08	0.000543548	0.0608109	0.000527852	0.00178186	1	Brain_Caudate_basal_ganglia
ENSG00000214941	ZSWIM7	5.28485	0.0338114	1.25805e-07	0.0493242	0.34516	2.16539e-19	5.97328e-18	1	Brain_Caudate_basal_ganglia
ENSG00000227782	AC002553.1	5.12064	0.0811389	3.04497e-07	0.00811738	0.0815405	0.000127879	0.000433633	4	Brain_Cerebellar_Hemisphere
ENSG00000267121	AC008105.3	6.78417	0.160395	1.16754e-11	0.00358283	0.0979421	2.47816e-05	9.50771e-05	4	Brain_Cerebellar_Hemisphere
ENSG00000236234	AC091132.2	9.6208	0.162369	6.53183e-22	0.00733708	0.120529	2.51394e-06	1.12771e-05	2	Brain_Cerebellar_Hemisphere
ENSG00000275263	AC135048.3	6.66813	0.0497648	2.59078e-11	0.0379196	0.0667911	0.000554001	0.00165713	2	Brain_Cerebellar_Hemisphere
ENSG00000260911	AC135050.3	-5.48927	-0.0921422	4.03588e-08	0.00787509	0.238779	6.86124e-12	6.4469e-11	4	Brain_Cerebellar_Hemisphere
ENSG00000260262	AC139887.3	4.98109	0.114443	6.32285e-07	0.00360742	0.0318238	0.0181779	0.0389169	2	Brain_Cerebellar_Hemisphere
ENSG00000170425	ADORA2B	5.3354	0.0344645	9.53362e-08	0.0484897	0.271992	1.35953e-13	1.59246e-12	3	Brain_Cerebellar_Hemisphere
ENSG00000159314	ARHGAP27	-7.52588	-0.0266933	5.23665e-14	0.141453	0.222039	4.66232e-11	4.00046e-10	6	Brain_Cerebellar_Hemisphere
ENSG00000185829	ARL17A	-7.36713	-0.0238857	1.74344e-13	0.199257	0.581608	1.46281e-34	2.48869e-32	25	Brain_Cerebellar_Hemisphere
ENSG00000228696	ARL17B	-9.21111	-0.115456	3.22764e-20	0.0122492	0.45372	1.72729e-24	7.05742e-23	1	Brain_Cerebellar_Hemisphere
ENSG00000196118	CCDC189	5.50288	0.0584002	3.7363e-08	0.0183894	0.0513377	0.00256827	0.00664841	6	Brain_Cerebellar_Hemisphere
ENSG00000130783	CCDC62	6.09214	0.0858489	1.11408e-09	0.010388	0.0988312	2.26625e-05	8.74604e-05	3	Brain_Cerebellar_Hemisphere
ENSG00000145214	DGKQ	-10.0853	-0.0658061	6.41871e-24	0.0415702	0.130992	8.59142e-07	4.13936e-06	7	Brain_Cerebellar_Hemisphere
ENSG00000169242	EFNA1	4.97076	0.0518604	6.66913e-07	0.0184986	0.177569	6.35169e-09	4.14113e-08	7	Brain_Cerebellar_Hemisphere
ENSG00000237765	FAM200B	5.56279	0.0214453	2.65489e-08	0.143401	0.38673	4.13646e-20	1.00889e-18	12	Brain_Cerebellar_Hemisphere
ENSG00000232300	FAM215B	-6.1498	-0.0778947	7.75832e-10	0.0121047	0.358604	2.07532e-18	4.20658e-17	4	Brain_Cerebellar_Hemisphere
ENSG00000184922	FMNL1	8.35048	0.0427399	6.79855e-17	0.0763251	0.364383	9.41283e-19	1.97946e-17	9	Brain_Cerebellar_Hemisphere
ENSG00000178950	GAK	6.86507	0.0298382	6.64591e-12	0.0975671	0.13697	4.63187e-07	2.3267e-06	11	Brain_Cerebellar_Hemisphere
ENSG00000099377	HSD3B7	-6.32259	-0.31811	2.57218e-10	0.000796481	0.0255071	0.0347561	0.0694186	2	Brain_Cerebellar_Hemisphere
ENSG00000080854	IGSF9B	-5.1257	-0.0650476	2.96432e-07	0.0132792	0.0271893	0.0292108	0.0594702	2	Brain_Cerebellar_Hemisphere
ENSG00000120071	KANSL1	-5.67162	-0.0321765	1.41453e-08	0.0655926	0.441645	1.15985e-23	4.31432e-22	14	Brain_Cerebellar_Hemisphere
ENSG00000214401	KANSL1-AS1	-9.36814	-0.0693099	7.38199e-21	0.0349576	0.605615	8.64311e-37	2.21477e-34	3	Brain_Cerebellar_Hemisphere
ENSG00000103510	KAT8	-5.01985	-0.051227	5.17106e-07	0.0205473	0.361796	1.34214e-18	2.76913e-17	7	Brain_Cerebellar_Hemisphere
ENSG00000230658	KLHL7-DT	-5.14444	-0.0119098	2.6832e-07	0.380328	0.464178	3.20928e-25	1.40235e-23	6	Brain_Cerebellar_Hemisphere
ENSG00000238083	LRRC37A2	-9.20387	-0.0287618	3.4527e-20	0.204809	0.672032	9.70189e-44	1.1238e-40	13	Brain_Cerebellar_Hemisphere
ENSG00000186868	MAPT	8.01965	0.0868237	1.06047e-15	0.0160651	0.0518215	0.00244767	0.00636798	4	Brain_Cerebellar_Hemisphere
ENSG00000264589	MAPT-AS1	7.84368	0.0470101	4.37518e-15	0.0545555	0.113644	5.07031e-06	2.16676e-05	9	Brain_Cerebellar_Hemisphere
ENSG00000279685	MAPT-IT1	-9.57898	-0.173494	9.80056e-22	0.00569178	0.0509754	0.00266246	0.00686058	2	Brain_Cerebellar_Hemisphere
ENSG00000138722	MMRN1	8.03367	0.112497	9.45997e-16	0.0107422	0.132962	7.01139e-07	3.42178e-06	2	Brain_Cerebellar_Hemisphere
ENSG00000136448	NMT1	5.74292	0.0297091	9.30574e-09	0.0735449	0.132824	7.11239e-07	3.46537e-06	15	Brain_Cerebellar_Hemisphere
ENSG00000073969	NSF	4.62165	0.0924264	3.80697e-06	0.00504662	0.221082	5.19626e-11	4.42931e-10	7	Brain_Cerebellar_Hemisphere
ENSG00000178226	PRSS36	-4.79977	-0.0158937	1.58852e-06	0.196982	0.276438	7.94129e-14	9.58311e-13	5	Brain_Cerebellar_Hemisphere
ENSG00000117280	RAB29	6.23579	0.02217	4.49508e-10	0.177163	0.201812	4.49362e-10	3.41022e-09	8	Brain_Cerebellar_Hemisphere
ENSG00000138760	SCARB2	5.2438	0.0737091	1.57303e-07	0.0105246	0.0462841	0.00424762	0.0104844	7	Brain_Cerebellar_Hemisphere
ENSG00000099381	SETD1A	-5.63297	-0.768965	1.77135e-08	0.000115986	0.0520684	0.00238832	0.00623389	2	Brain_Cerebellar_Hemisphere
ENSG00000145217	SLC26A1	4.94344	0.0132031	7.67558e-07	0.266713	0.393525	1.56451e-20	3.99914e-19	7	Brain_Cerebellar_Hemisphere
ENSG00000247775	SNCA-AS1	-4.66232	-0.0131728	3.12664e-06	0.263613	0.220162	5.76668e-11	4.88543e-10	13	Brain_Cerebellar_Hemisphere
ENSG00000185294	SPPL2C	-9.73266	-0.0449228	2.18799e-22	0.0888239	0.368775	5.13657e-19	1.10711e-17	6	Brain_Cerebellar_Hemisphere
ENSG00000099365	STX1B	-5.66812	-0.0622555	1.44373e-08	0.0184483	0.097393	2.61876e-05	0.000100046	4	Brain_Cerebellar_Hemisphere
ENSG00000103496	STX4	-5.67874	-0.72337	1.3569e-08	0.000136836	0.0339033	0.0147187	0.0322838	1	Brain_Cerebellar_Hemisphere
ENSG00000127419	TMEM175	-6.88221	-0.0574463	5.89326e-12	0.0242747	0.180382	4.68782e-09	3.12964e-08	2	Brain_Cerebellar_Hemisphere
ENSG00000011295	TTC19	-5.44317	-0.0533322	5.23401e-08	0.0215935	0.0460537	0.00434632	0.0107001	2	Brain_Cerebellar_Hemisphere
ENSG00000167395	ZNF646	-5.67874	-0.365403	1.3569e-08	0.00053626	0.0529616	0.00218547	0.0057529	1	Brain_Cerebellar_Hemisphere
ENSG00000167394	ZNF668	5.30922	0.531628	1.10093e-07	0.000212669	0.0284237	0.0257285	0.0530993	2	Brain_Cerebellar_Hemisphere
ENSG00000214941	ZSWIM7	-5.45793	-0.0253961	4.81717e-08	0.094797	0.33488	4.96507e-17	8.53812e-16	3	Brain_Cerebellar_Hemisphere
ENSG00000227782	AC002553.1	5.08874	0.032947	3.60445e-07	0.0485101	0.0581328	0.000436832	0.00117679	2	Brain_Cerebellum
ENSG00000267121	AC008105.3	4.62151	0.283689	3.80965e-06	0.000546465	0.1259	1.35389e-07	6.15006e-07	4	Brain_Cerebellum
ENSG00000260911	AC135050.3	-5.45708	-0.0898047	4.84029e-08	0.00819451	0.399408	1.05358e-24	2.516e-23	4	Brain_Cerebellum
ENSG00000170425	ADORA2B	5.30049	0.0333858	1.15494e-07	0.0511152	0.104148	1.88235e-06	7.2955e-06	5	Brain_Cerebellum
ENSG00000159314	ARHGAP27	-7.60585	-0.0247568	2.83034e-14	0.168263	0.3492	4.5702e-21	7.86981e-20	7	Brain_Cerebellum
ENSG00000185829	ARL17A	-7.35483	-0.0357254	1.9117e-13	0.0916426	0.594722	1.80838e-42	2.73091e-40	19	Brain_Cerebellum
ENSG00000196118	CCDC189	6.13588	0.0481316	8.46894e-10	0.0373054	0.0420856	0.00288478	0.00666458	6	Brain_Cerebellum
ENSG00000130783	CCDC62	5.84782	0.112823	4.98045e-09	0.00555255	0.111884	7.42166e-07	3.04155e-06	3	Brain_Cerebellum
ENSG00000262372	CR936218.1	5.3161	0.0620299	1.06013e-07	0.0147899	0.0187803	0.0478562	0.0854572	4	Brain_Cerebellum
ENSG00000145214	DGKQ	-9.87033	-0.0444746	5.59815e-23	0.0872637	0.219367	8.59049e-13	6.84858e-12	11	Brain_Cerebellum
ENSG00000169242	EFNA1	4.8808	0.0675709	1.05657e-06	0.0104079	0.169818	5.66542e-10	3.3978e-09	7	Brain_Cerebellum
ENSG00000160767	FAM189B	5.64095	0.158175	1.69116e-08	0.00219988	0.0204993	0.0386285	0.0704781	2	Brain_Cerebellum
ENSG00000184922	FMNL1	9.18142	0.0450566	4.25448e-20	0.0835806	0.344783	9.26138e-21	1.54905e-19	7	Brain_Cerebellum
ENSG00000178950	GAK	6.99474	0.0365589	2.65748e-12	0.067867	0.100946	2.76286e-06	1.04345e-05	9	Brain_Cerebellum
ENSG00000127415	IDUA	-5.47619	-0.0278856	4.34584e-08	0.05597	0.173568	3.50962e-10	2.14971e-09	17	Brain_Cerebellum
ENSG00000080854	IGSF9B	-4.96611	-0.0546321	6.83077e-07	0.0176448	0.247618	1.78577e-14	1.67419e-13	3	Brain_Cerebellum
ENSG00000120071	KANSL1	-5.48278	-0.0291793	4.18691e-08	0.0760392	0.423511	1.476e-26	4.27347e-25	24	Brain_Cerebellum
ENSG00000214401	KANSL1-AS1	-9.3689	-0.0690925	7.32908e-21	0.035184	0.633362	5.49513e-47	1.38974e-44	3	Brain_Cerebellum
ENSG00000103510	KAT8	-4.76327	-0.0255152	1.90481e-06	0.0786949	0.400926	8.09181e-25	1.95236e-23	4	Brain_Cerebellum
ENSG00000230658	KLHL7-DT	-5.13989	-0.0121915	2.74897e-07	0.362772	0.449882	1.12608e-28	3.85605e-27	7	Brain_Cerebellum
ENSG00000176681	LRRC37A	-9.21111	-0.0379689	3.22764e-20	0.113263	0.639676	9.05742e-48	2.60444e-45	1	Brain_Cerebellum
ENSG00000238083	LRRC37A2	-9.24088	-0.0286702	2.44489e-20	0.208253	0.698662	7.99019e-56	8.38611e-53	15	Brain_Cerebellum
ENSG00000186868	MAPT	6.65343	0.0784141	2.86333e-11	0.0140184	0.0684396	0.00013013	0.000382517	4	Brain_Cerebellum
ENSG00000264589	MAPT-AS1	8.45764	0.0576339	2.72854e-17	0.0422978	0.0574756	0.000471879	0.00126294	8	Brain_Cerebellum
ENSG00000279685	MAPT-IT1	-9.91353	-0.184325	3.6356e-23	0.00551755	0.135548	4.14642e-08	2.00779e-07	5	Brain_Cerebellum
ENSG00000138722	MMRN1	7.08519	0.0292787	1.38849e-12	0.136125	0.141672	1.94586e-08	9.86131e-08	4	Brain_Cerebellum
ENSG00000073969	NSF	7.02467	0.36914	2.14578e-12	0.000688831	0.205458	5.51418e-12	4.08139e-11	1	Brain_Cerebellum
ENSG00000225190	PLEKHM1	8.26266	0.0735669	1.4246e-16	0.025774	0.602922	2.16581e-43	3.57973e-41	18	Brain_Cerebellum
ENSG00000178226	PRSS36	-4.79664	-0.0158797	1.61352e-06	0.197079	0.419827	2.866e-26	8.02135e-25	5	Brain_Cerebellum
ENSG00000117280	RAB29	6.26416	0.0218834	3.74849e-10	0.183462	0.240443	4.83718e-14	4.37096e-13	9	Brain_Cerebellum
ENSG00000103549	RNF40	-4.98583	-0.0266759	6.16961e-07	0.0753646	0.182176	1.16043e-10	7.48111e-10	8	Brain_Cerebellum
ENSG00000138760	SCARB2	5.91432	0.0427684	3.33247e-09	0.0381066	0.101811	2.4909e-06	9.49454e-06	17	Brain_Cerebellum
ENSG00000099381	SETD1A	-5.35177	-0.410826	8.70981e-08	0.000372561	0.0651829	0.000190835	0.000545306	1	Brain_Cerebellum
ENSG00000185294	SPPL2C	-9.69634	-0.0280959	3.12495e-22	0.222986	0.37745	4.45311e-23	9.25496e-22	6	Brain_Cerebellum
ENSG00000127419	TMEM175	-7.23114	-0.0291364	4.78973e-13	0.106775	0.213324	1.93399e-12	1.49087e-11	4	Brain_Cerebellum
ENSG00000167395	ZNF646	-5.67874	-0.351794	1.3569e-08	0.000578554	0.0438317	0.00234763	0.00553386	1	Brain_Cerebellum
ENSG00000214941	ZSWIM7	-5.48888	-0.0224155	4.04487e-08	0.122782	0.425497	1.03027e-26	3.00366e-25	4	Brain_Cerebellum
ENSG00000275413	AC002553.2	-5.51846	-0.357359	3.41983e-08	0.00049129	0.0304246	0.0123724	0.028862	3	Brain_Cortex
ENSG00000274678	AC106886.3	-6.0952	-0.10553	1.09304e-09	0.00676823	0.0291125	0.0144456	0.0331025	1	Brain_Cortex
ENSG00000232748	AC135050.1	5.83736	0.308347	5.30331e-09	0.000811854	0.0256411	0.0218197	0.0478388	3	Brain_Cortex
ENSG00000260911	AC135050.3	-5.22717	-0.0766864	1.72128e-07	0.0102838	0.151478	8.0469e-09	5.62212e-08	6	Brain_Cortex
ENSG00000278133	AC135050.6	4.85746	0.189358	1.18899e-06	0.00141559	0.0465994	0.00187971	0.00532153	1	Brain_Cortex
ENSG00000170425	ADORA2B	5.31514	0.0341629	1.06577e-07	0.0490466	0.133002	7.61568e-08	4.62114e-07	4	Brain_Cortex
ENSG00000159314	ARHGAP27	-8.19366	-0.0639989	2.53399e-16	0.0299283	0.130846	9.87463e-08	5.90986e-07	5	Brain_Cortex
ENSG00000185829	ARL17A	-7.79048	-0.0408503	6.67565e-15	0.0762015	0.518643	4.55772e-34	4.40965e-32	10	Brain_Cortex
ENSG00000228696	ARL17B	-9.21111	-0.18523	3.22764e-20	0.00475908	0.52117	2.66484e-34	2.67695e-32	1	Brain_Cortex
ENSG00000099385	BCL7C	-5.80492	-0.177702	6.43965e-09	0.0023091	0.0713852	0.000107643	0.000395584	4	Brain_Cortex
ENSG00000196118	CCDC189	6.03389	0.0405747	1.60055e-09	0.051741	0.216613	2.04683e-12	2.19812e-11	6	Brain_Cortex
ENSG00000004468	CD38	-7.72087	-0.0423511	1.15537e-14	0.0739221	0.232332	2.52904e-13	3.00663e-12	11	Brain_Cortex
ENSG00000120088	CRHR1	-6.63393	-0.119503	3.26873e-11	0.0057528	0.0192329	0.0473577	0.0951489	3	Brain_Cortex
ENSG00000145214	DGKQ	6.23884	0.102299	4.40819e-10	0.00713467	0.0910993	1.09212e-05	4.7749e-05	7	Brain_Cortex
ENSG00000169242	EFNA1	4.99693	0.0542275	5.82496e-07	0.0170579	0.0567256	0.000584159	0.00183709	4	Brain_Cortex
ENSG00000143590	EFNA3	-5.01448	-0.127602	5.31783e-07	0.00300752	0.0264934	0.0197109	0.0437684	2	Brain_Cortex
ENSG00000179344	HLA-DQB1	-4.81207	-0.0691986	1.49376e-06	0.00891407	0.519005	4.22075e-34	4.10253e-32	1	Brain_Cortex
ENSG00000099377	HSD3B7	-6.42524	-0.0570157	1.31664e-10	0.0289846	0.0635946	0.000264581	0.00089537	6	Brain_Cortex
ENSG00000127415	IDUA	-7.08349	-0.0857568	1.40565e-12	0.011964	0.0351469	0.00710826	0.0175636	5	Brain_Cortex
ENSG00000080854	IGSF9B	-5.02349	-0.120685	5.0742e-07	0.00348206	0.0757393	6.50576e-05	0.000249158	4	Brain_Cortex
ENSG00000120071	KANSL1	-7.03647	-0.0631794	1.97166e-12	0.025119	0.414173	2.31573e-25	9.2081e-24	12	Brain_Cortex
ENSG00000214401	KANSL1-AS1	-9.18747	-0.0258994	4.022e-20	0.253537	0.674248	2.45589e-51	1.84148e-48	16	Brain_Cortex
ENSG00000103510	KAT8	-4.96562	-0.02569	6.8483e-07	0.0811069	0.364206	9.99992e-22	2.84483e-20	3	Brain_Cortex
ENSG00000230658	KLHL7-DT	-5.10291	-0.0115254	3.34469e-07	0.400588	0.610751	1.82592e-43	5.18043e-41	10	Brain_Cortex
ENSG00000176681	LRRC37A	-8.54054	-0.0595849	1.33592e-17	0.03896	0.664468	4.98078e-50	3.26786e-47	12	Brain_Cortex
ENSG00000238083	LRRC37A2	-8.29812	-0.029625	1.05775e-16	0.156372	0.730578	1.00923e-59	5.29722e-56	30	Brain_Cortex
ENSG00000243368	MCCC1-AS1	-4.98708	-0.0677479	6.12988e-07	0.0132235	0.0511726	0.00110839	0.00330079	4	Brain_Cortex
ENSG00000260083	MIR762HG	-4.97249	-0.195423	6.60992e-07	0.00135152	0.0441703	0.00248969	0.00685971	4	Brain_Cortex
ENSG00000138722	MMRN1	8.45076	0.0388969	2.89405e-17	0.120792	0.177688	3.08829e-10	2.59666e-09	11	Brain_Cortex
ENSG00000164182	NDUFAF2	5.86795	0.0694183	4.41223e-09	0.014396	0.0693051	0.000136883	0.000492773	3	Brain_Cortex
ENSG00000136243	NUPL2	5.24638	0.0187116	1.55118e-07	0.153315	0.388835	1.75641e-23	5.8533e-22	7	Brain_Cortex
ENSG00000225190	PLEKHM1	-8.27037	-0.0697437	1.33546e-16	0.0250761	0.287031	1.25966e-16	2.13969e-15	2	Brain_Cortex
ENSG00000117280	RAB29	6.86472	0.0370417	6.66204e-12	0.0758327	0.169617	8.50853e-10	6.77681e-09	6	Brain_Cortex
ENSG00000138760	SCARB2	5.81069	0.100653	6.22143e-09	0.00708324	0.0272325	0.0180518	0.040448	5	Brain_Cortex
ENSG00000185294	SPPL2C	-7.15757	-0.0915443	8.21224e-13	0.0116346	0.0675875	0.000166907	0.000588647	6	Brain_Cortex
ENSG00000103496	STX4	5.77709	0.11107	7.60052e-09	0.00597369	0.0694044	0.000135322	0.000487655	2	Brain_Cortex
ENSG00000152128	TMEM163	5.50711	0.539834	3.6478e-08	0.000201798	0.10403	2.39988e-06	1.16904e-05	5	Brain_Cortex
ENSG00000127419	TMEM175	-5.37265	-0.0249354	7.75879e-08	0.0905766	0.137569	4.38562e-08	2.76671e-07	13	Brain_Cortex
ENSG00000011295	TTC19	-5.46895	-0.0472566	4.52719e-08	0.0277979	0.114123	7.28147e-07	3.85268e-06	3	Brain_Cortex
ENSG00000167394	ZNF668	5.20995	1.2137	1.88895e-07	3.93057e-05	0.0326148	0.00956236	0.0228893	1	Brain_Cortex
ENSG00000214941	ZSWIM7	5.51672	0.0276409	3.45381e-08	0.081545	0.515311	9.20872e-34	8.55474e-32	3	Brain_Cortex
ENSG00000232748	AC135050.1	5.20995	5.59116	1.88895e-07	1.85215e-06	0.0412009	0.00705927	0.0203123	1	Brain_Frontal_Cortex_BA9
ENSG00000260911	AC135050.3	-5.5821	-0.030647	2.37634e-08	0.0729032	0.0995773	2.10238e-05	0.000107669	6	Brain_Frontal_Cortex_BA9
ENSG00000170425	ADORA2B	5.32867	0.0553436	9.89358e-08	0.0187539	0.138936	3.77753e-07	2.62452e-06	2	Brain_Frontal_Cortex_BA9
ENSG00000159314	ARHGAP27	-5.35729	-0.0290286	8.44815e-08	0.0635004	0.0713216	0.000353349	0.00138083	6	Brain_Frontal_Cortex_BA9
ENSG00000185829	ARL17A	-7.84883	-0.0410355	4.19921e-15	0.0764889	0.527336	5.85949e-30	7.88725e-28	10	Brain_Frontal_Cortex_BA9
ENSG00000228696	ARL17B	-9.21111	-0.191564	3.22764e-20	0.00444955	0.472909	7.67828e-26	6.51218e-24	1	Brain_Frontal_Cortex_BA9
ENSG00000196118	CCDC189	5.90272	0.0269945	3.57553e-09	0.110229	0.198962	6.1577e-10	6.61897e-09	11	Brain_Frontal_Cortex_BA9
ENSG00000004468	CD38	-7.63252	-0.0466623	2.30203e-14	0.0579851	0.0614855	0.000937786	0.00333833	9	Brain_Frontal_Cortex_BA9
ENSG00000145214	DGKQ	5.61729	0.117719	1.93973e-08	0.00436739	0.264711	3.25748e-13	5.55715e-12	3	Brain_Frontal_Cortex_BA9
ENSG00000169242	EFNA1	4.55807	0.0399388	5.16256e-06	0.026405	0.0312402	0.0192907	0.048991	1	Brain_Frontal_Cortex_BA9
ENSG00000099377	HSD3B7	-6.31819	-0.31358	2.64639e-10	0.000818507	0.0635627	0.000763156	0.00277154	2	Brain_Frontal_Cortex_BA9
ENSG00000127415	IDUA	-7.86032	-0.22053	3.83154e-15	0.00237512	0.0374087	0.0103312	0.0283096	3	Brain_Frontal_Cortex_BA9
ENSG00000120071	KANSL1	-7.47741	-0.0766638	7.58006e-14	0.0198698	0.217186	8.06905e-11	9.70892e-10	7	Brain_Frontal_Cortex_BA9
ENSG00000214401	KANSL1-AS1	-9.09249	-0.0254843	9.67995e-20	0.254308	0.63142	2.43063e-39	1.44894e-36	16	Brain_Frontal_Cortex_BA9
ENSG00000103510	KAT8	-4.94157	-0.0250381	7.74963e-07	0.0833537	0.26052	5.367e-13	8.88707e-12	5	Brain_Frontal_Cortex_BA9
ENSG00000230658	KLHL7-DT	-5.10011	-0.0115729	3.39458e-07	0.39689	0.580003	2.03979e-34	5.38711e-32	10	Brain_Frontal_Cortex_BA9
ENSG00000176681	LRRC37A	-7.09166	-0.0619184	1.32508e-12	0.0246239	0.604939	1.00301e-36	3.2195e-34	15	Brain_Frontal_Cortex_BA9
ENSG00000238083	LRRC37A2	-8.55724	-0.0316882	1.15602e-17	0.142735	0.701871	2.47773e-47	1.29238e-43	19	Brain_Frontal_Cortex_BA9
ENSG00000243368	MCCC1-AS1	-4.89624	-0.0641079	9.76854e-07	0.0141703	0.0536782	0.00203528	0.00669463	5	Brain_Frontal_Cortex_BA9
ENSG00000138722	MMRN1	8.62637	0.0374023	6.3331e-18	0.133737	0.240942	5.34126e-12	7.60164e-11	11	Brain_Frontal_Cortex_BA9
ENSG00000136243	NUPL2	5.23927	0.0201071	1.61214e-07	0.129426	0.393711	1.52325e-20	6.52579e-19	13	Brain_Frontal_Cortex_BA9
ENSG00000225190	PLEKHM1	-8.28453	-0.0685396	1.18575e-16	0.026119	0.222759	4.2969e-11	5.38442e-10	4	Brain_Frontal_Cortex_BA9
ENSG00000117280	RAB29	6.67013	0.0513207	2.5558e-11	0.0360068	0.176867	6.85087e-09	6.28293e-08	7	Brain_Frontal_Cortex_BA9
ENSG00000138760	SCARB2	5.25154	0.0450204	1.50833e-07	0.0279369	0.0772546	0.000195937	0.000815323	15	Brain_Frontal_Cortex_BA9
ENSG00000107295	SH3GL2	4.60659	0.0283616	4.09327e-06	0.0513482	0.115384	4.24814e-06	2.47372e-05	4	Brain_Frontal_Cortex_BA9
ENSG00000185294	SPPL2C	-6.60989	-0.0508445	3.84602e-11	0.0317843	0.0668948	0.000548326	0.00205834	7	Brain_Frontal_Cortex_BA9
ENSG00000103496	STX4	5.72556	0.120093	1.03096e-08	0.00503532	0.164641	2.53661e-08	2.14267e-07	2	Brain_Frontal_Cortex_BA9
ENSG00000127419	TMEM175	-5.38226	-0.0262747	7.35581e-08	0.0814043	0.160592	3.89896e-08	3.20899e-07	8	Brain_Frontal_Cortex_BA9
ENSG00000167394	ZNF668	5.20995	0.917832	1.88895e-07	6.87312e-05	0.0332145	0.0157831	0.0410596	1	Brain_Frontal_Cortex_BA9
ENSG00000214941	ZSWIM7	5.52778	0.0360733	3.24309e-08	0.0483136	0.38576	4.74766e-20	1.90125e-18	9	Brain_Frontal_Cortex_BA9
ENSG00000260911	AC135050.3	-5.31467	-0.0421233	1.06848e-07	0.0353813	0.184352	8.68661e-09	1.11329e-07	1	Brain_Hippocampus
ENSG00000278133	AC135050.6	4.85746	0.178829	1.18899e-06	0.00158719	0.0369487	0.0133813	0.0410949	1	Brain_Hippocampus
ENSG00000170425	ADORA2B	5.0127	0.0342688	5.3671e-07	0.0443246	0.0729083	0.000452474	0.00214615	7	Brain_Hippocampus
ENSG00000228696	ARL17B	-9.21111	-0.220204	3.22764e-20	0.00336738	0.374072	2.63718e-18	1.38004e-16	1	Brain_Hippocampus
ENSG00000196118	CCDC189	6.13683	0.0468458	8.41829e-10	0.0395322	0.155072	1.6687e-07	1.70021e-06	6	Brain_Hippocampus
ENSG00000120088	CRHR1	6.96059	0.0788422	3.38861e-12	0.014783	0.0564919	0.00211194	0.00829086	12	Brain_Hippocampus
ENSG00000169242	EFNA1	4.55807	0.0719638	5.16256e-06	0.00813295	0.0825491	0.000182737	0.000960616	1	Brain_Hippocampus
ENSG00000237765	FAM200B	4.66795	0.0170341	3.04225e-06	0.149853	0.189142	5.31052e-09	7.0406e-08	11	Brain_Hippocampus
ENSG00000127415	IDUA	-7.55777	-0.24425	4.10053e-14	0.00181671	0.0459564	0.0056927	0.0196488	3	Brain_Hippocampus
ENSG00000080854	IGSF9B	-5.16685	-0.166799	2.38067e-07	0.00205235	0.0414598	0.00871181	0.0284081	1	Brain_Hippocampus
ENSG00000120071	KANSL1	-5.57536	-0.0321499	2.47015e-08	0.0635161	0.253564	5.42753e-12	1.18942e-10	14	Brain_Hippocampus
ENSG00000214401	KANSL1-AS1	-9.14267	-0.0276801	6.09278e-20	0.220899	0.597598	4.8419e-34	2.39501e-31	18	Brain_Hippocampus
ENSG00000103510	KAT8	-4.94186	-0.025129	7.73804e-07	0.0826731	0.211674	5.06473e-10	8.03819e-09	5	Brain_Hippocampus
ENSG00000230658	KLHL7-DT	-5.10041	-0.0114953	3.3892e-07	0.402264	0.668511	6.30309e-41	1.45496e-37	9	Brain_Hippocampus
ENSG00000176681	LRRC37A	-8.63039	-0.0711093	6.11452e-18	0.0278177	0.545917	9.57078e-30	2.45473e-27	11	Brain_Hippocampus
ENSG00000238083	LRRC37A2	-9.06269	-0.0299221	1.27275e-19	0.186058	0.617229	8.0888e-36	4.94249e-33	12	Brain_Hippocampus
ENSG00000264589	MAPT-AS1	7.39023	0.0480319	1.46574e-13	0.0466466	0.136464	1.04518e-06	9.0587e-06	8	Brain_Hippocampus
ENSG00000279685	MAPT-IT1	-9.58045	-0.11603	9.66197e-22	0.0128617	0.0435454	0.00714982	0.0239538	6	Brain_Hippocampus
ENSG00000138722	MMRN1	8.86724	0.0856245	7.49782e-19	0.0218167	0.270086	8.49623e-13	2.1038e-11	4	Brain_Hippocampus
ENSG00000141027	NCOR1	5.60409	0.0628443	2.09358e-08	0.0157259	0.0564679	0.0021167	0.00830489	6	Brain_Hippocampus
ENSG00000164182	NDUFAF2	5.83826	0.0672604	5.2749e-09	0.0151746	0.0662406	0.000846029	0.00372694	2	Brain_Hippocampus
ENSG00000136243	NUPL2	5.19541	0.027547	2.0427e-07	0.0690834	0.348355	7.2656e-17	3.13159e-15	6	Brain_Hippocampus
ENSG00000225190	PLEKHM1	-8.46004	-0.0879054	2.67293e-17	0.0165908	0.105906	1.99771e-05	0.000131295	3	Brain_Hippocampus
ENSG00000178226	PRSS36	-4.91529	-0.0169612	8.86502e-07	0.181845	0.215981	3.21e-10	5.22631e-09	3	Brain_Hippocampus
ENSG00000117280	RAB29	6.14179	0.0362194	8.15961e-10	0.0628017	0.13448	1.26872e-06	1.07847e-05	3	Brain_Hippocampus
ENSG00000103549	RNF40	-5.01632	-0.0334746	5.26718e-07	0.0484248	0.063903	0.00105349	0.00451263	5	Brain_Hippocampus
ENSG00000103496	STX4	5.67874	0.197885	1.3569e-08	0.00182849	0.0380813	0.0120113	0.0374339	1	Brain_Hippocampus
ENSG00000127419	TMEM175	-6.8002	-0.118396	1.04475e-11	0.00564416	0.0611415	0.00136505	0.00567975	1	Brain_Hippocampus
ENSG00000011295	TTC19	-5.77367	-0.0458177	7.75616e-09	0.0319475	0.111122	1.21324e-05	8.35992e-05	4	Brain_Hippocampus
ENSG00000167395	ZNF646	-5.67874	-0.362809	1.3569e-08	0.000543957	0.093508	6.49142e-05	0.000382037	1	Brain_Hippocampus
ENSG00000214941	ZSWIM7	5.59395	0.0324022	2.21955e-08	0.0606565	0.117023	6.88543e-06	5.00682e-05	3	Brain_Hippocampus
ENSG00000267198	AC091132.4	4.879	0.208877	1.06627e-06	0.00109394	0.0490625	0.00369781	0.0134219	2	Brain_Hypothalamus
ENSG00000275263	AC135048.3	6.11044	0.0979504	9.93576e-10	0.00825401	0.0643817	0.000841692	0.00370038	2	Brain_Hypothalamus
ENSG00000232748	AC135050.1	5.17638	0.044656	2.26231e-07	0.0300615	0.0274092	0.0309598	0.081548	4	Brain_Hypothalamus
ENSG00000260911	AC135050.3	-5.54523	-0.0979911	2.9356e-08	0.00711005	0.0827452	0.00014261	0.000770383	3	Brain_Hypothalamus
ENSG00000170425	ADORA2B	5.03508	0.0284146	4.7764e-07	0.065316	0.131595	1.16469e-06	9.84333e-06	9	Brain_Hypothalamus
ENSG00000185829	ARL17A	-7.29622	-0.042276	2.95974e-13	0.0636243	0.433168	1.80797e-22	1.46501e-20	13	Brain_Hypothalamus
ENSG00000228696	ARL17B	-9.21111	-0.176556	3.22764e-20	0.00523814	0.441241	5.37042e-23	4.65363e-21	1	Brain_Hypothalamus
ENSG00000196118	CCDC189	6.05394	0.0259188	1.41349e-09	0.125311	0.13932	5.35519e-07	4.88362e-06	7	Brain_Hypothalamus
ENSG00000004468	CD38	-7.72386	-0.0463047	1.12862e-14	0.0602845	0.0719161	0.000406659	0.00194401	5	Brain_Hypothalamus
ENSG00000099377	HSD3B7	-5.97622	-0.257831	2.28373e-09	0.00108203	0.103941	1.80603e-05	0.000120686	2	Brain_Hypothalamus
ENSG00000120071	KANSL1	-7.19717	-0.0740522	6.14763e-13	0.0197649	0.231336	3.16421e-11	5.76619e-10	7	Brain_Hypothalamus
ENSG00000214401	KANSL1-AS1	-9.27076	-0.0294972	1.84826e-20	0.199789	0.552353	3.92697e-31	1.09697e-28	9	Brain_Hypothalamus
ENSG00000103510	KAT8	-4.95844	-0.0259389	7.1061e-07	0.0779259	0.22512	6.30538e-11	1.10266e-09	5	Brain_Hypothalamus
ENSG00000230658	KLHL7-DT	-5.11425	-0.0116064	3.14985e-07	0.396153	0.564206	4.07914e-32	1.39677e-29	7	Brain_Hypothalamus
ENSG00000176681	LRRC37A	-8.83391	-0.0551819	1.01079e-18	0.0492226	0.64602	9.91622e-40	1.75434e-36	15	Brain_Hypothalamus
ENSG00000238083	LRRC37A2	-9.16	-0.0281395	5.18953e-20	0.215875	0.676612	4.88678e-43	2.48241e-39	13	Brain_Hypothalamus
ENSG00000264589	MAPT-AS1	7.63456	0.0424975	2.26587e-14	0.0635199	0.282767	8.55287e-14	2.26972e-12	8	Brain_Hypothalamus
ENSG00000279685	MAPT-IT1	-9.44287	-0.108455	3.62695e-21	0.0143056	0.0889224	7.82858e-05	0.000448809	6	Brain_Hypothalamus
ENSG00000138722	MMRN1	9.13166	0.0746475	6.74539e-20	0.0302639	0.187483	3.69528e-09	4.99686e-08	8	Brain_Hypothalamus
ENSG00000141027	NCOR1	5.50594	0.111657	3.67198e-08	0.00491212	0.0307266	0.0222324	0.0618928	6	Brain_Hypothalamus
ENSG00000136243	NUPL2	5.08338	0.0276787	3.70783e-07	0.0646476	0.325135	4.80461e-16	1.73473e-14	9	Brain_Hypothalamus
ENSG00000225190	PLEKHM1	-8.02947	-0.0732515	9.78975e-16	0.021578	0.103695	1.85025e-05	0.000123253	5	Brain_Hypothalamus
ENSG00000178226	PRSS36	-4.87158	-0.0165546	1.1071e-06	0.187195	0.253638	2.55319e-12	5.53105e-11	4	Brain_Hypothalamus
ENSG00000117280	RAB29	6.22558	0.022593	4.79786e-10	0.170068	0.186616	4.05027e-09	5.43192e-08	8	Brain_Hypothalamus
ENSG00000138760	SCARB2	6.73876	0.0737604	1.59742e-11	0.0173778	0.0327947	0.0181121	0.0521878	10	Brain_Hypothalamus
ENSG00000103496	STX4	5.79138	0.120638	6.9811e-09	0.00508271	0.196714	1.38333e-09	1.99647e-08	2	Brain_Hypothalamus
ENSG00000127419	TMEM175	-6.81608	-0.0561762	9.35597e-12	0.0250478	0.028672	0.027283	0.0735014	4	Brain_Hypothalamus
ENSG00000011295	TTC19	-5.4622	-0.0471655	4.70259e-08	0.027849	0.0594816	0.00135066	0.00560486	4	Brain_Hypothalamus
ENSG00000214941	ZSWIM7	5.74661	0.0562835	9.10509e-09	0.0213106	0.301391	9.0998e-15	2.78383e-13	10	Brain_Hypothalamus
ENSG00000227782	AC002553.1	5.66721	0.137497	1.4514e-08	0.003453	0.0202091	0.0435729	0.0924484	1	Brain_Nucleus_accumbens_basal_ganglia
ENSG00000226816	AC005082.1	-5.07022	-0.0414592	3.97356e-07	0.0331071	0.20201	1.94904e-11	2.2635e-10	2	Brain_Nucleus_accumbens_basal_ganglia
ENSG00000260911	AC135050.3	-5.54976	-0.0954207	2.86062e-08	0.00751523	0.0668861	0.000202124	0.000772737	2	Brain_Nucleus_accumbens_basal_ganglia
ENSG00000278133	AC135050.6	4.89222	0.0619124	9.97052e-07	0.0137457	0.0585894	0.000519264	0.00181306	2	Brain_Nucleus_accumbens_basal_ganglia
ENSG00000170425	ADORA2B	5.32995	0.0354361	9.82404e-08	0.045755	0.116062	7.00852e-07	4.29617e-06	3	Brain_Nucleus_accumbens_basal_ganglia
ENSG00000159314	ARHGAP27	-9.72327	-0.0583078	2.39938e-22	0.0543898	0.256865	1.40207e-14	2.3714e-13	12	Brain_Nucleus_accumbens_basal_ganglia
ENSG00000185829	ARL17A	-8.15546	-0.0375882	3.47847e-16	0.0983238	0.378843	1.89802e-22	7.30564e-21	10	Brain_Nucleus_accumbens_basal_ganglia
ENSG00000228696	ARL17B	-9.21111	-0.181467	3.22764e-20	0.00495849	0.515113	2.86416e-33	3.3134e-31	1	Brain_Nucleus_accumbens_basal_ganglia
ENSG00000099385	BCL7C	-5.66631	-0.170252	1.45905e-08	0.00239806	0.0672443	0.00019405	0.000745544	4	Brain_Nucleus_accumbens_basal_ganglia
ENSG00000196118	CCDC189	5.91574	0.0276627	3.30392e-09	0.105265	0.334241	2.07205e-19	5.84725e-18	10	Brain_Nucleus_accumbens_basal_ganglia
ENSG00000004468	CD38	-7.2415	-0.0296317	4.43746e-13	0.127913	0.179572	3.29991e-10	3.27318e-09	13	Brain_Nucleus_accumbens_basal_ganglia
ENSG00000262372	CR936218.1	9.25629	1.40051	2.11666e-20	8.09033e-05	0.0254365	0.0233768	0.0536306	1	Brain_Nucleus_accumbens_basal_ganglia
ENSG00000120088	CRHR1	5.90564	0.0351593	3.51274e-09	0.0584926	0.127012	1.93242e-07	1.3061e-06	12	Brain_Nucleus_accumbens_basal_ganglia
ENSG00000169242	EFNA1	5.08818	0.0271913	3.61516e-07	0.0713115	0.0798245	4.6226e-05	0.000202622	8	Brain_Nucleus_accumbens_basal_ganglia
ENSG00000049167	ERCC8	-5.068	-0.0287558	4.02015e-07	0.0594286	0.0495595	0.00145034	0.00455643	13	Brain_Nucleus_accumbens_basal_ganglia
ENSG00000237765	FAM200B	4.99353	0.0170369	5.92869e-07	0.169921	0.249445	3.84044e-14	6.18101e-13	11	Brain_Nucleus_accumbens_basal_ganglia
ENSG00000178950	GAK	4.81027	0.165289	1.50727e-06	0.00154865	0.0294385	0.0146239	0.035478	5	Brain_Nucleus_accumbens_basal_ganglia
ENSG00000120071	KANSL1	-7.17771	-0.0723142	7.08873e-13	0.0205525	0.214408	3.95751e-12	4.99195e-11	8	Brain_Nucleus_accumbens_basal_ganglia
ENSG00000214401	KANSL1-AS1	-9.40187	-0.0637236	5.36019e-21	0.041621	0.598046	1.89979e-41	6.31423e-39	6	Brain_Nucleus_accumbens_basal_ganglia
ENSG00000103510	KAT8	-4.9357	-0.0249245	7.98648e-07	0.0838983	0.252309	2.60584e-14	4.30313e-13	5	Brain_Nucleus_accumbens_basal_ganglia
ENSG00000122550	KLHL7	-4.62043	-0.0505041	3.82947e-06	0.0174741	0.039324	0.00466832	0.0129128	7	Brain_Nucleus_accumbens_basal_ganglia
ENSG00000230658	KLHL7-DT	-5.11305	-0.0116343	3.17e-07	0.39414	0.567165	3.19596e-38	6.62577e-36	7	Brain_Nucleus_accumbens_basal_ganglia
ENSG00000176681	LRRC37A	-8.78391	-0.0640615	1.57888e-18	0.035819	0.642156	1.64133e-46	1.37471e-43	14	Brain_Nucleus_accumbens_basal_ganglia
ENSG00000264589	MAPT-AS1	8.13925	0.0411396	3.97737e-16	0.0818103	0.351509	1.46034e-20	4.56389e-19	9	Brain_Nucleus_accumbens_basal_ganglia
ENSG00000279685	MAPT-IT1	-9.65197	-0.118315	4.82194e-22	0.012552	0.0517345	0.00113226	0.00365027	6	Brain_Nucleus_accumbens_basal_ganglia
ENSG00000243368	MCCC1-AS1	-4.89138	-0.06369	1.00133e-06	0.0143192	0.0622053	0.000344231	0.00125223	5	Brain_Nucleus_accumbens_basal_ganglia
ENSG00000138722	MMRN1	9.00361	0.0395692	2.18406e-19	0.124902	0.172751	7.69225e-10	7.26186e-09	8	Brain_Nucleus_accumbens_basal_ganglia
ENSG00000141027	NCOR1	5.18971	0.57943	2.10624e-07	0.000166859	0.0494163	0.00147418	0.00462511	2	Brain_Nucleus_accumbens_basal_ganglia
ENSG00000164182	NDUFAF2	5.94575	0.0677355	2.75187e-09	0.0155378	0.0283271	0.01665	0.039803	2	Brain_Nucleus_accumbens_basal_ganglia
ENSG00000175938	ORAI3	5.88242	0.0248289	4.04304e-09	0.112455	0.0903304	1.38631e-05	6.72568e-05	7	Brain_Nucleus_accumbens_basal_ganglia
ENSG00000225190	PLEKHM1	-4.92682	-0.0545306	8.35772e-07	0.0158784	0.279554	6.05882e-16	1.20366e-14	7	Brain_Nucleus_accumbens_basal_ganglia
ENSG00000178226	PRSS36	-4.743	-0.015658	2.10581e-06	0.198414	0.39973	6.04662e-24	2.71114e-22	5	Brain_Nucleus_accumbens_basal_ganglia
ENSG00000117280	RAB29	6.70483	0.0297089	2.01646e-11	0.112884	0.154514	7.17754e-09	5.94739e-08	11	Brain_Nucleus_accumbens_basal_ganglia
ENSG00000103549	RNF40	-6.03075	-0.103657	1.63199e-09	0.00693888	0.154774	6.95428e-09	5.77153e-08	5	Brain_Nucleus_accumbens_basal_ganglia
ENSG00000138760	SCARB2	5.3687	0.0705935	7.93075e-08	0.0120343	0.106298	2.18969e-06	1.23518e-05	7	Brain_Nucleus_accumbens_basal_ganglia
ENSG00000080603	SRCAP	-5.67114	-0.148471	1.41849e-08	0.00309421	0.0294476	0.0146085	0.0354446	2	Brain_Nucleus_accumbens_basal_ganglia
ENSG00000198648	STK39	-5.1071	-0.0660209	3.27144e-07	0.0117199	0.0851189	2.52163e-05	0.000116275	7	Brain_Nucleus_accumbens_basal_ganglia
ENSG00000103496	STX4	5.7754	0.0684509	7.67716e-09	0.0157211	0.183587	1.99928e-10	2.04708e-09	2	Brain_Nucleus_accumbens_basal_ganglia
ENSG00000127419	TMEM175	-6.61791	-0.0447385	3.64314e-11	0.0383966	0.0467531	0.00199682	0.0060843	5	Brain_Nucleus_accumbens_basal_ganglia
ENSG00000011295	TTC19	-4.67294	-0.0271433	2.96918e-06	0.0595984	0.135492	7.06379e-08	5.07058e-07	9	Brain_Nucleus_accumbens_basal_ganglia
ENSG00000214941	ZSWIM7	5.28485	0.0503441	1.25805e-07	0.0222479	0.350138	1.80705e-20	5.58081e-19	1	Brain_Nucleus_accumbens_basal_ganglia
ENSG00000227782	AC002553.1	5.62689	0.0906526	1.83491e-08	0.00783703	0.0358281	0.013431	0.0353033	2	Brain_Putamen_basal_ganglia
ENSG00000260911	AC135050.3	-5.37485	-0.0465541	7.66471e-08	0.0292969	0.121748	3.11253e-06	1.89694e-05	2	Brain_Putamen_basal_ganglia
ENSG00000170425	ADORA2B	5.30787	0.0340544	1.10914e-07	0.0492283	0.0520054	0.00278117	0.00880106	4	Brain_Putamen_basal_ganglia
ENSG00000159314	ARHGAP27	-8.08944	-0.0614305	5.99386e-16	0.0308295	0.078228	0.000220894	0.000911088	6	Brain_Putamen_basal_ganglia
ENSG00000185829	ARL17A	-7.75271	-0.0352208	8.99553e-15	0.103794	0.280291	1.14739e-13	2.205e-12	15	Brain_Putamen_basal_ganglia
ENSG00000196118	CCDC189	6.0836	0.0429922	1.1751e-09	0.0466046	0.0438102	0.00615648	0.0178016	6	Brain_Putamen_basal_ganglia
ENSG00000004468	CD38	-7.5476	-0.0414831	4.43365e-14	0.0697364	0.157942	8.04295e-08	6.52723e-07	5	Brain_Putamen_basal_ganglia
ENSG00000120088	CRHR1	7.04613	0.0566991	1.83956e-12	0.0310242	0.0751953	0.000296205	0.00118581	13	Brain_Putamen_basal_ganglia
ENSG00000169242	EFNA1	4.53576	0.021789	5.73971e-06	0.0881669	0.106117	1.45869e-05	7.81186e-05	8	Brain_Putamen_basal_ganglia
ENSG00000237765	FAM200B	4.81828	0.0176018	1.44799e-06	0.149001	0.155622	1.02047e-07	8.14595e-07	12	Brain_Putamen_basal_ganglia
ENSG00000130787	HIP1R	4.74727	0.0687176	2.06176e-06	0.00989488	0.0475957	0.00426267	0.012864	2	Brain_Putamen_basal_ganglia
ENSG00000120071	KANSL1	-7.49806	-0.0774577	6.47703e-14	0.0195792	0.29199	2.83976e-14	5.93458e-13	7	Brain_Putamen_basal_ganglia
ENSG00000214401	KANSL1-AS1	-9.52919	-0.0616033	1.58516e-21	0.0460245	0.608355	4.98818e-36	2.895e-33	4	Brain_Putamen_basal_ganglia
ENSG00000103510	KAT8	-4.96656	-0.0261064	6.81494e-07	0.0771798	0.250113	3.81833e-12	6.05479e-11	5	Brain_Putamen_basal_ganglia
ENSG00000230658	KLHL7-DT	-5.19818	-0.012658	2.01252e-07	0.342774	0.499676	4.71961e-27	5.26755e-25	6	Brain_Putamen_basal_ganglia
ENSG00000078081	LAMP3	-5.74976	-0.0861578	8.93682e-09	0.00918101	0.0340929	0.015933	0.0410095	7	Brain_Putamen_basal_ganglia
ENSG00000176681	LRRC37A	-9.21111	-0.548889	3.22764e-20	0.000541971	0.617545	6.73719e-37	4.56175e-34	1	Brain_Putamen_basal_ganglia
ENSG00000238083	LRRC37A2	-9.26079	-0.0289433	2.02918e-20	0.204912	0.590505	2.13873e-34	8.68881e-32	10	Brain_Putamen_basal_ganglia
ENSG00000264589	MAPT-AS1	5.53455	0.033994	3.12025e-08	0.051333	0.155025	1.08485e-07	8.60471e-07	17	Brain_Putamen_basal_ganglia
ENSG00000279685	MAPT-IT1	-9.42075	-0.10745	4.47891e-21	0.0145051	0.0508587	0.0031075	0.00970819	6	Brain_Putamen_basal_ganglia
ENSG00000243368	MCCC1-AS1	-4.92218	-0.0648869	8.55876e-07	0.0139904	0.0465369	0.00472376	0.0140942	5	Brain_Putamen_basal_ganglia
ENSG00000138722	MMRN1	8.34843	0.0346969	6.91765e-17	0.145335	0.301816	8.6403e-15	1.93934e-13	9	Brain_Putamen_basal_ganglia
ENSG00000141027	NCOR1	5.48301	0.111533	4.18147e-08	0.0048717	0.0230742	0.0479921	0.107922	5	Brain_Putamen_basal_ganglia
ENSG00000164182	NDUFAF2	6.00405	0.0751462	1.92454e-09	0.0128818	0.0622328	0.00103567	0.00365895	2	Brain_Putamen_basal_ganglia
ENSG00000136243	NUPL2	5.25037	0.0342956	1.51796e-07	0.0450488	0.243198	8.36705e-12	1.26836e-10	8	Brain_Putamen_basal_ganglia
ENSG00000225190	PLEKHM1	-8.20071	-0.0698798	2.38965e-16	0.0246215	0.271433	3.2558e-13	5.97427e-12	3	Brain_Putamen_basal_ganglia
ENSG00000117280	RAB29	5.26974	0.0277131	1.36613e-07	0.0789149	0.13994	5.0303e-07	3.56153e-06	7	Brain_Putamen_basal_ganglia
ENSG00000103549	RNF40	-4.75282	-0.044783	2.00604e-06	0.0245642	0.149688	1.87139e-07	1.42479e-06	5	Brain_Putamen_basal_ganglia
ENSG00000138760	SCARB2	6.25852	0.0631016	3.88656e-10	0.0206045	0.116191	5.40142e-06	3.16011e-05	12	Brain_Putamen_basal_ganglia
ENSG00000198648	STK39	-5.12678	-0.0557782	2.94741e-07	0.0163735	0.0833798	0.000134099	0.000579687	8	Brain_Putamen_basal_ganglia
ENSG00000103496	STX4	5.84573	0.0525951	5.04354e-09	0.0271614	0.0522179	0.00272459	0.00863274	3	Brain_Putamen_basal_ganglia
ENSG00000127419	TMEM175	-5.54213	-0.0527241	2.98806e-08	0.0199424	0.101643	2.26256e-05	0.000116001	3	Brain_Putamen_basal_ganglia
ENSG00000011295	TTC19	-5.53632	-0.0408426	3.08885e-08	0.038204	0.214993	1.91824e-10	2.3473e-09	7	Brain_Putamen_basal_ganglia
ENSG00000214941	ZSWIM7	5.04034	0.0333195	4.64697e-07	0.0462611	0.294888	2.00253e-14	4.27283e-13	8	Brain_Putamen_basal_ganglia
ENSG00000145214	DGKQ	-5.74117	-0.661834	9.40265e-09	0.000111266	0.170999	1.48906e-06	1.5369e-05	1	Brain_Spinal_cord_cervical_c-1
ENSG00000275413	AC002553.2	-4.92641	-0.0242728	8.37559e-07	0.0830921	0.0991286	0.000329802	0.00189443	6	Brain_Spinal_cord_cervical_c-1
ENSG00000120088	CRHR1	8.28805	0.205283	1.15123e-16	0.0030159	0.0852991	0.000905504	0.00456579	4	Brain_Spinal_cord_cervical_c-1
ENSG00000198171	DDRGK1	5.12208	0.234237	3.02181e-07	0.000895055	0.0351246	0.0356037	0.0999602	2	Brain_Spinal_cord_cervical_c-1
ENSG00000169242	EFNA1	4.81656	0.0291968	1.46051e-06	0.0553315	0.142631	1.30301e-05	0.000108308	5	Brain_Spinal_cord_cervical_c-1
ENSG00000120071	KANSL1	-4.53575	-0.0648697	5.73997e-06	0.00994838	0.153344	5.78164e-06	5.26016e-05	5	Brain_Spinal_cord_cervical_c-1
ENSG00000214401	KANSL1-AS1	-9.88173	-0.0715688	4.99627e-23	0.0357846	0.546919	4.62927e-23	9.03357e-21	5	Brain_Spinal_cord_cervical_c-1
ENSG00000264589	MAPT-AS1	6.14904	0.0401869	7.79541e-10	0.0471104	0.257053	1.37805e-09	2.60631e-08	7	Brain_Spinal_cord_cervical_c-1
ENSG00000279685	MAPT-IT1	-6.24755	-0.0672766	4.1695e-10	0.0161482	0.0884978	0.000717206	0.00372334	2	Brain_Spinal_cord_cervical_c-1
ENSG00000243368	MCCC1-AS1	-5.00039	-0.0682833	5.72145e-07	0.0130811	0.0319093	0.0453623	0.122341	5	Brain_Spinal_cord_cervical_c-1
ENSG00000138722	MMRN1	7.87509	0.0241399	3.40495e-15	0.277184	0.155435	4.92913e-06	4.53993e-05	16	Brain_Spinal_cord_cervical_c-1
ENSG00000275263	AC135048.3	5.99496	0.554643	2.03538e-09	0.000247747	0.0347027	0.036749	0.102706	1	Brain_Spinal_cord_cervical_c-1
ENSG00000260911	AC135050.3	-5.33059	-0.0939997	9.78941e-08	0.00714234	0.313349	9.47816e-12	2.57352e-10	3	Brain_Spinal_cord_cervical_c-1
ENSG00000278133	AC135050.6	4.85746	0.211829	1.18899e-06	0.00113118	0.0474034	0.014324	0.0468124	1	Brain_Spinal_cord_cervical_c-1
ENSG00000143537	ADAM15	-4.88778	-0.0177249	1.01979e-06	0.132465	0.314826	8.27521e-12	2.27187e-10	14	Brain_Spinal_cord_cervical_c-1
ENSG00000163749	CCDC158	-4.68802	-0.0505441	2.75861e-06	0.0169723	0.198984	1.65106e-07	2.05693e-06	1	Brain_Spinal_cord_cervical_c-1
ENSG00000185829	ARL17A	-6.53889	-0.0532401	6.19762e-11	0.0303434	0.152405	6.21024e-06	5.60128e-05	6	Brain_Spinal_cord_cervical_c-1
ENSG00000228696	ARL17B	-9.21111	-0.118829	3.22764e-20	0.0115638	0.390471	5.28412e-15	2.45183e-13	1	Brain_Spinal_cord_cervical_c-1
ENSG00000127419	TMEM175	-6.8002	-0.0953206	1.04475e-11	0.00870759	0.0771838	0.00163447	0.00759237	1	Brain_Spinal_cord_cervical_c-1
ENSG00000011295	TTC19	-5.27519	-0.0465765	1.32617e-07	0.0264289	0.147137	9.26613e-06	7.99822e-05	2	Brain_Spinal_cord_cervical_c-1
ENSG00000170425	ADORA2B	5.40749	0.0394571	6.39144e-08	0.0381607	0.229373	1.40448e-08	2.18196e-07	5	Brain_Spinal_cord_cervical_c-1
ENSG00000204290	BTNL2	4.66033	0.0482236	3.15701e-06	0.0195057	0.0614721	0.00512328	0.0200139	7	Brain_Spinal_cord_cervical_c-1
ENSG00000136243	NUPL2	5.75597	0.109644	8.61466e-09	0.00544085	0.431651	6.58411e-17	4.06735e-15	2	Brain_Spinal_cord_cervical_c-1
ENSG00000117280	RAB29	6.67795	0.0295104	2.42302e-11	0.113544	0.130659	3.20303e-05	0.000240963	10	Brain_Spinal_cord_cervical_c-1
ENSG00000178226	PRSS36	-4.78412	-0.0160549	1.71734e-06	0.191909	0.046826	0.014945	0.0485533	5	Brain_Spinal_cord_cervical_c-1
ENSG00000176681	LRRC37A	-9.21111	-0.0753365	3.22764e-20	0.0287696	0.426441	1.16615e-16	6.80148e-15	1	Brain_Spinal_cord_cervical_c-1
ENSG00000167395	ZNF646	-5.67874	-0.368973	1.3569e-08	0.000525935	0.0410608	0.0228723	0.0692035	1	Brain_Spinal_cord_cervical_c-1
ENSG00000230658	KLHL7-DT	-5.10012	-0.0114194	3.39434e-07	0.407105	0.618307	1.05419e-27	4.7851e-25	7	Brain_Spinal_cord_cervical_c-1
ENSG00000103510	KAT8	-4.95185	-0.0271576	7.35102e-07	0.0709856	0.13613	2.12575e-05	0.000166926	3	Brain_Spinal_cord_cervical_c-1
ENSG00000275413	AC002553.2	-4.67185	-0.0546288	2.98503e-06	0.0152801	0.101808	0.000539907	0.00353763	6	Brain_Substantia_nigra
ENSG00000260911	AC135050.3	-5.31467	-0.0514724	1.06848e-07	0.0236957	0.190289	1.22518e-06	1.71142e-05	1	Brain_Substantia_nigra
ENSG00000170425	ADORA2B	5.35798	0.0404234	8.41585e-08	0.0359701	0.129597	8.3512e-05	0.000713812	4	Brain_Substantia_nigra
ENSG00000185829	ARL17A	-7.38368	-0.0469438	1.53978e-13	0.0520469	0.156445	1.32727e-05	0.000143089	8	Brain_Substantia_nigra
ENSG00000228696	ARL17B	-9.21111	-0.119126	3.22764e-20	0.0115061	0.344942	6.48911e-12	2.77788e-10	1	Brain_Substantia_nigra
ENSG00000169242	EFNA1	4.9518	0.0577048	7.35318e-07	0.0147796	0.103838	0.00047158	0.00313852	5	Brain_Substantia_nigra
ENSG00000189157	FAM47E	-4.50769	-0.0412264	6.55376e-06	0.0250513	0.372821	5.47459e-13	2.82643e-11	3	Brain_Substantia_nigra
ENSG00000099364	FBXL19	-6.44336	-0.0686445	1.16856e-10	0.018262	0.0401061	0.032649	0.109085	2	Brain_Substantia_nigra
ENSG00000127415	IDUA	-6.1082	-0.805383	1.00758e-09	0.000109181	0.0523153	0.0143753	0.0553253	1	Brain_Substantia_nigra
ENSG00000120071	KANSL1	-7.31192	-0.077707	2.63357e-13	0.0185761	0.230186	6.62225e-08	1.28736e-06	6	Brain_Substantia_nigra
ENSG00000214401	KANSL1-AS1	-9.31807	-0.0256148	1.18477e-20	0.261464	0.465421	6.40973e-17	7.44108e-15	10	Brain_Substantia_nigra
ENSG00000103510	KAT8	-4.92016	-0.0278401	8.6475e-07	0.0698715	0.128751	8.84437e-05	0.000747262	4	Brain_Substantia_nigra
ENSG00000230658	KLHL7-DT	-5.13526	-0.0118595	2.81756e-07	0.382265	0.586534	3.23735e-23	1.38585e-20	7	Brain_Substantia_nigra
ENSG00000176681	LRRC37A	-9.21111	-0.0597968	3.22764e-20	0.0456654	0.449896	3.23708e-16	3.19786e-14	1	Brain_Substantia_nigra
ENSG00000264589	MAPT-AS1	7.11138	0.0416491	1.14888e-12	0.0577762	0.177287	3.08858e-06	3.858e-05	8	Brain_Substantia_nigra
ENSG00000279685	MAPT-IT1	-9.74552	-0.175615	1.92795e-22	0.00577712	0.0860082	0.00154174	0.00862034	3	Brain_Substantia_nigra
ENSG00000138722	MMRN1	8.99812	0.0696723	2.29619e-19	0.0330032	0.25494	1.01238e-08	2.35056e-07	6	Brain_Substantia_nigra
ENSG00000164182	NDUFAF2	5.74979	0.166476	8.9353e-09	0.00240005	0.0420411	0.0286404	0.098133	2	Brain_Substantia_nigra
ENSG00000136243	NUPL2	4.96476	0.0334184	6.87857e-07	0.0414169	0.388957	1.2463e-13	7.11361e-12	10	Brain_Substantia_nigra
ENSG00000117280	RAB29	6.17731	0.0229192	6.52014e-10	0.162799	0.172764	4.24839e-06	5.1502e-05	5	Brain_Substantia_nigra
ENSG00000152214	RIT2	4.66771	0.127225	3.04575e-06	0.0027754	0.0348901	0.0465986	0.14614	3	Brain_Substantia_nigra
ENSG00000103549	RNF40	-4.82289	-0.0446108	1.41492e-06	0.0252003	0.164184	7.74925e-06	8.85112e-05	5	Brain_Substantia_nigra
ENSG00000103496	STX4	5.9253	0.130729	3.1173e-09	0.00452549	0.0484155	0.0186553	0.0687215	2	Brain_Substantia_nigra
ENSG00000127419	TMEM175	-6.8002	-0.105201	1.04475e-11	0.00714877	0.0939655	0.000909594	0.00549878	1	Brain_Substantia_nigra
ENSG00000227782	AC002553.1	4.93164	0.1922	8.15437e-07	0.00135084	0.0140932	0.0343327	0.0593643	4	Colon_Sigmoid
ENSG00000226816	AC005082.1	-5.06586	-0.0461567	4.06567e-07	0.0241007	0.230347	1.0016e-19	1.34812e-18	6	Colon_Sigmoid
ENSG00000260911	AC135050.3	-5.96312	-0.116781	2.4746e-09	0.00577395	0.186037	7.70312e-16	7.6053e-15	3	Colon_Sigmoid
ENSG00000170425	ADORA2B	5.27513	0.0306492	1.32659e-07	0.0598255	0.189583	3.82961e-16	3.87798e-15	4	Colon_Sigmoid
ENSG00000228696	ARL17B	4.69496	0.0284271	2.66654e-06	0.0496021	0.54026	2.89201e-55	3.55458e-53	18	Colon_Sigmoid
ENSG00000120088	CRHR1	-9.80437	-0.16579	1.07813e-22	0.006786	0.0353507	0.000752396	0.00184976	6	Colon_Sigmoid
ENSG00000145214	DGKQ	-8.99446	-0.137901	2.37387e-19	0.00689152	0.281221	1.84468e-24	3.4962e-23	8	Colon_Sigmoid
ENSG00000136235	GPNMB	5.14974	0.331747	2.60849e-07	0.000482603	0.0588498	1.21723e-05	4.02204e-05	3	Colon_Sigmoid
ENSG00000099377	HSD3B7	5.1894	0.025579	2.10968e-07	0.0899343	0.0658505	3.55361e-06	1.27208e-05	4	Colon_Sigmoid
ENSG00000127415	IDUA	-6.51835	-0.0441093	7.10856e-11	0.0382903	0.251711	1.12285e-21	1.75134e-20	14	Colon_Sigmoid
ENSG00000120071	KANSL1	-8.2107	-0.057814	2.199e-16	0.0396064	0.429253	2.24754e-40	1.04265e-38	16	Colon_Sigmoid
ENSG00000214401	KANSL1-AS1	-9.22474	-0.0257076	2.8424e-20	0.258347	0.630123	3.19373e-70	1.1919e-67	26	Colon_Sigmoid
ENSG00000103510	KAT8	-4.97157	-0.0256931	6.64145e-07	0.0794739	0.258065	2.88284e-22	4.66665e-21	4	Colon_Sigmoid
ENSG00000176681	LRRC37A	-9.21111	-0.146782	3.22764e-20	0.00757874	0.562587	1.08756e-58	1.70407e-56	1	Colon_Sigmoid
ENSG00000088899	LZTS3	-5.35864	-0.0479612	8.38517e-08	0.0253207	0.0584971	1.29501e-05	4.25372e-05	9	Colon_Sigmoid
ENSG00000186868	MAPT	5.0033	0.0154686	5.63579e-07	0.218467	0.464904	8.10562e-45	4.95166e-43	20	Colon_Sigmoid
ENSG00000279685	MAPT-IT1	-9.60059	-0.198125	7.94859e-22	0.00446238	0.0166775	0.0212505	0.038587	5	Colon_Sigmoid
ENSG00000243368	MCCC1-AS1	-5.08397	-0.0543635	3.69625e-07	0.0205096	0.0260831	0.00388139	0.0082782	5	Colon_Sigmoid
ENSG00000156873	PHKG2	5.84273	1.32011	5.13524e-09	3.87357e-05	0.0231041	0.00661399	0.0134388	2	Colon_Sigmoid
ENSG00000225190	PLEKHM1	-8.53576	-0.097602	1.39242e-17	0.0137339	0.0457754	0.000120602	0.000342437	3	Colon_Sigmoid
ENSG00000156858	PRR14	5.44967	0.165784	5.04633e-08	0.00271625	0.0331618	0.00110667	0.00263704	3	Colon_Sigmoid
ENSG00000117280	RAB29	5.9635	0.016355	2.46893e-09	0.293283	0.308003	4.3742e-27	9.67509e-26	15	Colon_Sigmoid
ENSG00000099365	STX1B	-5.50083	-0.127911	3.77998e-08	0.00403776	0.0231323	0.00658068	0.0133804	2	Colon_Sigmoid
ENSG00000127419	TMEM175	-6.14466	-0.0799017	8.01335e-10	0.0113783	0.0668863	2.9609e-06	1.06999e-05	3	Colon_Sigmoid
ENSG00000108379	WNT3	-7.92995	-0.056315	2.19229e-15	0.042792	0.184779	9.86469e-16	9.66965e-15	7	Colon_Sigmoid
ENSG00000167395	ZNF646	-5.69017	-0.292304	1.26913e-08	0.000841486	0.0170643	0.0197908	0.036186	2	Colon_Sigmoid
ENSG00000167394	ZNF668	5.20995	0.492148	1.88895e-07	0.00023905	0.0183248	0.0157094	0.0293779	1	Colon_Sigmoid
ENSG00000214941	ZSWIM7	-4.86688	-0.0712016	1.13373e-06	0.00953042	0.0172469	0.0191379	0.0351301	5	Colon_Sigmoid
ENSG00000226816	AC005082.1	-4.71424	-0.0309536	2.42617e-06	0.0468031	0.172494	8.87515e-17	8.79979e-16	5	Colon_Transverse
ENSG00000260911	AC135050.3	-5.48419	-0.0658921	4.15365e-08	0.0150808	0.21264	8.94418e-21	1.20905e-19	6	Colon_Transverse
ENSG00000170425	ADORA2B	5.27709	0.0317052	1.31249e-07	0.0560273	0.068176	3.76993e-07	1.48453e-06	6	Colon_Transverse
ENSG00000228696	ARL17B	4.61307	0.029988	3.96767e-06	0.0427089	0.447644	4.16014e-49	2.78491e-47	13	Colon_Transverse
ENSG00000145214	DGKQ	-8.45835	-0.132237	2.71199e-17	0.00760152	0.159067	1.75574e-15	1.58394e-14	11	Colon_Transverse
ENSG00000099377	HSD3B7	-5.29543	-0.200707	1.18735e-07	0.00139679	0.190759	1.42258e-18	1.62869e-17	3	Colon_Transverse
ENSG00000127415	IDUA	-5.23219	-0.0308544	1.67513e-07	0.0530872	0.274327	2.5897e-27	5.45446e-26	32	Colon_Transverse
ENSG00000080854	IGSF9B	-4.65146	-0.0358912	3.29591e-06	0.0350946	0.127015	1.83848e-12	1.27836e-11	13	Colon_Transverse
ENSG00000120071	KANSL1	-8.57762	-0.0872785	9.68567e-18	0.0194232	0.335796	2.16655e-34	6.7468e-33	12	Colon_Transverse
ENSG00000214401	KANSL1-AS1	-9.27457	-0.027145	1.7833e-20	0.233265	0.642342	1.00006e-83	6.78102e-81	23	Colon_Transverse
ENSG00000103510	KAT8	-5.10279	-0.0222367	3.34679e-07	0.112375	0.341275	4.72086e-35	1.53136e-33	8	Colon_Transverse
ENSG00000230658	KLHL7-DT	-5.10849	-0.010516	3.24744e-07	0.480136	0.522038	1.22736e-60	1.58276e-58	9	Colon_Transverse
ENSG00000176681	LRRC37A	-9.61025	-0.0408456	7.23708e-22	0.106446	0.471087	1.4501e-52	1.16785e-50	28	Colon_Transverse
ENSG00000238083	LRRC37A2	-9.19409	-0.030277	3.78199e-20	0.184229	0.497307	1.28493e-56	1.29852e-54	20	Colon_Transverse
ENSG00000088899	LZTS3	-5.36942	-0.0439763	7.89911e-08	0.0302149	0.0636262	9.49261e-07	3.52971e-06	14	Colon_Transverse
ENSG00000243368	MCCC1-AS1	-5.20676	-0.0596967	1.92171e-07	0.017649	0.0238152	0.00299612	0.00636403	4	Colon_Transverse
ENSG00000138722	MMRN1	8.13082	0.221078	4.26392e-16	0.002653	0.0226414	0.00381342	0.00792624	2	Colon_Transverse
ENSG00000225190	PLEKHM1	-8.48919	-0.103747	2.08086e-17	0.0120029	0.0392162	0.000131355	0.000357099	3	Colon_Transverse
ENSG00000151006	PRSS53	4.65797	0.143727	3.19335e-06	0.00222348	0.0222127	0.00416535	0.00858641	4	Colon_Transverse
ENSG00000117280	RAB29	6.03542	0.0180873	1.58548e-09	0.247209	0.354587	1.1045e-36	3.86942e-35	15	Colon_Transverse
ENSG00000099365	STX1B	-5.95282	-0.0709847	2.63566e-09	0.0148576	0.0915662	3.13105e-09	1.57188e-08	3	Colon_Transverse
ENSG00000103496	STX4	-4.85212	-0.085346	1.22151e-06	0.00729032	0.114132	2.8249e-11	1.75005e-10	6	Colon_Transverse
ENSG00000108379	WNT3	-9.53652	-0.0621485	1.47704e-21	0.0531777	0.177168	3.1071e-17	3.21098e-16	8	Colon_Transverse
ENSG00000167395	ZNF646	-5.49179	-0.27495	3.9788e-08	0.000884998	0.0659718	5.89865e-07	2.25518e-06	3	Colon_Transverse
ENSG00000214941	ZSWIM7	-5.36479	-0.918718	8.10433e-08	6.98136e-05	0.0944066	1.73988e-09	8.96821e-09	1	Colon_Transverse
ENSG00000275263	AC135048.3	5.99496	0.164351	2.03538e-09	0.00282158	0.0294591	0.0131795	0.0368014	1	Liver
ENSG00000170425	ADORA2B	5.25883	0.0315254	1.44974e-07	0.0562428	0.27011	8.68524e-16	2.24464e-14	6	Liver
ENSG00000185829	ARL17A	-6.88358	-0.0438698	5.8368e-12	0.051376	0.389408	7.5579e-24	4.78195e-22	17	Liver
ENSG00000262881	CR936218.2	9.7198	0.0246145	2.48257e-22	0.2942	0.455667	5.0908e-29	5.44111e-27	8	Liver
ENSG00000145214	DGKQ	-8.84266	-0.137629	9.34664e-19	0.00661242	0.169699	6.32758e-10	8.24984e-09	8	Liver
ENSG00000136235	GPNMB	5.49019	0.297596	4.01497e-08	0.000656151	0.0843588	2.08367e-05	0.000124311	4	Liver
ENSG00000099377	HSD3B7	6.4885	1.97765	8.66954e-11	2.28582e-05	0.118633	3.50078e-07	2.93173e-06	1	Liver
ENSG00000214401	KANSL1-AS1	-9.37885	-0.0557807	6.66979e-21	0.0545517	0.667718	3.51794e-51	8.31904e-48	6	Liver
ENSG00000103510	KAT8	-4.81316	-0.0226256	1.48564e-06	0.0956158	0.190491	4.39425e-11	6.62922e-10	6	Liver
ENSG00000230658	KLHL7-DT	-5.09824	-0.010625	3.42834e-07	0.468317	0.444643	4.06282e-28	3.96188e-26	7	Liver
ENSG00000156928	MALSU1	5.42866	0.205787	5.67777e-08	0.00148314	0.0490631	0.00130296	0.00504592	1	Liver
ENSG00000279685	MAPT-IT1	9.18716	0.0318234	4.03339e-20	0.158252	0.204257	7.26473e-12	1.20768e-10	10	Liver
ENSG00000138722	MMRN1	7.28464	0.180062	3.22542e-13	0.00324592	0.1707	5.57223e-10	7.3256e-09	5	Liver
ENSG00000141027	NCOR1	5.26417	0.148694	1.40822e-07	0.00255441	0.0321754	0.00952942	0.0279782	3	Liver
ENSG00000073969	NSF	-4.74873	-0.05199	2.047e-06	0.0151775	0.0432997	0.00256088	0.00905207	4	Liver
ENSG00000178226	PRSS36	-5.17678	-0.0438544	2.25749e-07	0.0307057	0.037392	0.00513439	0.016584	4	Liver
ENSG00000117280	RAB29	6.02334	0.0181774	1.70855e-09	0.245931	0.214789	1.79787e-12	3.23617e-11	9	Liver
ENSG00000099381	SETD1A	-6.17151	-1.25518	6.76406e-10	5.1871e-05	0.0235688	0.0268348	0.0677695	3	Liver
ENSG00000163479	SSR2	4.73316	0.0450505	2.21053e-06	0.0200272	0.030892	0.0111046	0.0317626	1	Liver
ENSG00000099365	STX1B	-5.74487	-0.0760449	9.19931e-09	0.0124632	0.0446338	0.00218963	0.00790223	3	Liver
ENSG00000103496	STX4	-5.67874	-0.176434	1.3569e-08	0.00230014	0.0457757	0.00191515	0.00703096	1	Liver
ENSG00000011295	TTC19	-5.08087	-0.0226466	3.75719e-07	0.102279	0.172622	4.36473e-10	5.82723e-09	6	Liver
ENSG00000167397	VKORC1	-5.41962	-0.253991	5.9727e-08	0.00102026	0.520342	1.04813e-34	2.20317e-32	2	Liver
ENSG00000167395	ZNF646	-5.49806	-0.024316	3.83997e-08	0.112842	0.186703	7.17663e-11	1.04921e-09	5	Liver
ENSG00000214941	ZSWIM7	-4.86986	-0.0726352	1.11677e-06	0.00927006	0.118184	3.6959e-07	3.08149e-06	5	Liver
ENSG00000226816	AC005082.1	-5.46797	-0.0498915	4.55217e-08	0.0240315	0.0870935	1.51924e-07	6.8202e-07	3	Pancreas
ENSG00000270947	AC025811.1	-4.99524	-0.0135348	5.87639e-07	0.29127	0.388462	3.2149e-34	1.11091e-32	33	Pancreas
ENSG00000170425	ADORA2B	5.20406	0.0317174	1.94977e-07	0.0544757	0.273369	8.46833e-23	1.40489e-21	4	Pancreas
ENSG00000228696	ARL17B	-9.21111	-0.218425	3.22764e-20	0.00342248	0.378839	3.46525e-33	1.1283e-31	1	Pancreas
ENSG00000099385	BCL7C	-4.88889	-0.296716	1.01407e-06	0.000576454	0.0291511	0.00277568	0.00641041	2	Pancreas
ENSG00000196118	CCDC189	6.07471	0.0500404	1.24214e-09	0.0342116	0.0745071	1.30048e-06	5.17654e-06	6	Pancreas
ENSG00000262372	CR936218.1	9.37641	0.372209	6.82595e-21	0.00121862	0.0150468	0.032229	0.0591019	4	Pancreas
ENSG00000145214	DGKQ	-7.91099	-0.106346	2.55351e-15	0.00864336	0.354009	1.35867e-30	3.82623e-29	8	Pancreas
ENSG00000189157	FAM47E	-5.3589	-0.0166382	8.37295e-08	0.20806	0.558839	8.76112e-56	1.22643e-53	9	Pancreas
ENSG00000127415	IDUA	-6.68501	-0.0506134	2.30915e-11	0.030832	0.221303	3.35626e-18	3.96833e-17	14	Pancreas
ENSG00000120071	KANSL1	6.74396	0.161286	1.54122e-11	0.00343462	0.119262	5.71393e-10	3.39053e-09	3	Pancreas
ENSG00000214401	KANSL1-AS1	-9.42421	-0.0570112	4.33342e-21	0.0526335	0.492137	1.71388e-46	1.32003e-44	6	Pancreas
ENSG00000103510	KAT8	-4.80499	-0.022949	1.54759e-06	0.092257	0.212471	1.89007e-17	2.1001e-16	7	Pancreas
ENSG00000122550	KLHL7	-4.94833	-0.0280597	7.48543e-07	0.0642428	0.0729084	1.70618e-06	6.66552e-06	7	Pancreas
ENSG00000230658	KLHL7-DT	-5.10351	-0.0105344	3.33405e-07	0.477273	0.577989	1.03616e-58	1.82306e-56	11	Pancreas
ENSG00000238083	LRRC37A2	-9.17444	-0.0313119	4.53938e-20	0.168813	0.427262	1.49272e-38	7.06847e-37	18	Pancreas
ENSG00000164182	NDUFAF2	5.20829	0.082698	1.90592e-07	0.00765674	0.0298521	0.00246306	0.00574445	11	Pancreas
ENSG00000136243	NUPL2	5.47597	0.0579186	4.35114e-08	0.0171339	0.0483793	0.000107471	0.00032115	9	Pancreas
ENSG00000156873	PHKG2	5.65715	0.240975	1.53911e-08	0.0011489	0.0449043	0.000192996	0.000552429	1	Pancreas
ENSG00000225190	PLEKHM1	-8.37104	-0.0851373	5.71112e-17	0.0173108	0.0134878	0.0426846	0.0760291	3	Pancreas
ENSG00000117280	RAB29	6.16514	0.0195918	7.04189e-10	0.220855	0.199003	2.54639e-16	2.59345e-15	13	Pancreas
ENSG00000103496	STX4	-5.67874	-0.205626	1.3569e-08	0.00169343	0.0227463	0.00833397	0.0174619	1	Pancreas
ENSG00000127419	TMEM175	-6.80074	-0.069304	1.04082e-11	0.0164749	0.0200741	0.0132591	0.0266292	2	Pancreas
ENSG00000011295	TTC19	-4.73205	-0.0226745	2.22267e-06	0.0868873	0.25965	1.47717e-21	2.23593e-20	10	Pancreas
ENSG00000139722	VPS37B	-5.33967	-0.101505	9.31181e-08	0.00565442	0.0690075	3.30602e-06	1.23665e-05	3	Pancreas
ENSG00000108379	WNT3	-8.60334	-0.0550847	7.74266e-18	0.0519265	0.258657	1.81316e-21	2.73801e-20	7	Pancreas
ENSG00000167395	ZNF646	-4.96162	-0.0861501	6.99091e-07	0.00710777	0.0149886	0.0325674	0.0596654	1	Pancreas
ENSG00000131484	AC091132.1	7.01898	0.254396	2.23492e-12	0.00144638	0.225391	1.00138e-14	1.36824e-13	2	Pituitary
ENSG00000232748	AC135050.1	5.02209	0.796081	5.11127e-07	8.71136e-05	0.0710805	3.20751e-05	0.000134085	3	Pituitary
ENSG00000260911	AC135050.3	-5.08638	-0.0394739	3.64967e-07	0.0368776	0.220427	2.14416e-14	2.83349e-13	3	Pituitary
ENSG00000170425	ADORA2B	5.16725	0.0310801	2.37561e-07	0.0568314	0.235535	2.08303e-15	3.02544e-14	8	Pituitary
ENSG00000185829	ARL17A	-7.48304	-0.0314163	7.26244e-14	0.122866	0.562169	4.93317e-44	7.09063e-42	20	Pituitary
ENSG00000228696	ARL17B	-9.21111	-0.330684	3.22764e-20	0.0014932	0.479395	3.65877e-35	2.63801e-33	1	Pituitary
ENSG00000196118	CCDC189	5.9464	0.0197381	2.74107e-09	0.206773	0.407566	1.56119e-28	6.36409e-27	8	Pituitary
ENSG00000198171	DDRGK1	5.02103	0.111533	5.13965e-07	0.00383963	0.0280834	0.00975094	0.0236249	3	Pituitary
ENSG00000145214	DGKQ	-6.79705	-0.0964604	1.06784e-11	0.00769939	0.18171	6.99751e-12	7.1908e-11	10	Pituitary
ENSG00000157540	DYRK1A	4.57641	0.495862	4.73013e-06	0.00016404	0.0172729	0.0432421	0.0871158	2	Pituitary
ENSG00000169242	EFNA1	4.78352	0.0716366	1.72251e-06	0.00884293	0.0212234	0.024905	0.0537583	6	Pituitary
ENSG00000127415	IDUA	-6.51477	-0.0621252	7.28027e-11	0.0186709	0.0902604	2.47807e-06	1.25491e-05	9	Pituitary
ENSG00000080854	IGSF9B	-4.95195	-0.0588183	7.34728e-07	0.0151261	0.320641	1.70148e-21	4.12962e-20	6	Pituitary
ENSG00000120071	KANSL1	-7.07978	-0.0717759	1.44381e-12	0.0202065	0.421234	9.89304e-30	4.48735e-28	9	Pituitary
ENSG00000214401	KANSL1-AS1	-9.17042	-0.0264317	4.71165e-20	0.242943	0.67463	3.19758e-59	2.28317e-56	18	Pituitary
ENSG00000103510	KAT8	-4.96428	-0.0289529	6.89572e-07	0.062938	0.341635	4.126e-23	1.14019e-21	3	Pituitary
ENSG00000230658	KLHL7-DT	-5.10127	-0.0115557	3.37387e-07	0.398382	0.616595	7.93619e-51	2.25215e-48	11	Pituitary
ENSG00000176681	LRRC37A	-9.21111	-0.0362986	3.22764e-20	0.123926	0.674293	3.61265e-59	2.49893e-56	1	Pituitary
ENSG00000264589	MAPT-AS1	4.59756	0.0378907	4.2746e-06	0.028089	0.0168336	0.0460137	0.0918573	9	Pituitary
ENSG00000279685	MAPT-IT1	-8.71056	-0.080474	3.02385e-18	0.022121	0.114563	9.21044e-08	5.7575e-07	8	Pituitary
ENSG00000243368	MCCC1-AS1	-4.87338	-0.0573447	1.09704e-06	0.0170941	0.0732946	2.38979e-05	0.000102297	6	Pituitary
ENSG00000138722	MMRN1	8.66481	0.0804672	4.5228e-18	0.0245804	0.221667	1.77339e-14	2.36755e-13	8	Pituitary
ENSG00000136243	NUPL2	5.39069	0.0321797	7.01879e-08	0.0540197	0.244911	4.79477e-16	7.39082e-15	7	Pituitary
ENSG00000225190	PLEKHM1	-8.23655	-0.0796921	1.77244e-16	0.0190619	0.0758392	1.7034e-05	7.51539e-05	4	Pituitary
ENSG00000156858	PRR14	5.22922	0.114842	1.70231e-07	0.00523189	0.0414232	0.00163426	0.00478939	4	Pituitary
ENSG00000117280	RAB29	6.15837	0.031471	7.34986e-10	0.0837825	0.187025	3.2093e-12	3.40383e-11	5	Pituitary
ENSG00000103549	RNF40	-4.97527	-0.0300736	6.51552e-07	0.0589627	0.0807554	8.84486e-06	4.09584e-05	7	Pituitary
ENSG00000127419	TMEM175	-6.78777	-0.0628537	1.13883e-11	0.019953	0.115753	7.8261e-08	4.92693e-07	2	Pituitary
ENSG00000011295	TTC19	-5.17677	-0.0279456	2.25756e-07	0.0703934	0.152502	4.68781e-10	3.93048e-09	6	Pituitary
ENSG00000167397	VKORC1	5.02642	0.800585	4.99708e-07	8.45453e-05	0.0659257	6.35779e-05	0.000251978	2	Pituitary
ENSG00000108379	WNT3	-8.58707	-0.024719	8.92158e-18	0.262903	0.274369	4.22846e-18	7.87853e-17	12	Pituitary
ENSG00000214941	ZSWIM7	-5.27291	-0.118276	1.34278e-07	0.00411712	0.186933	3.25313e-12	3.44701e-11	1	Pituitary
ENSG00000226816	AC005082.1	-4.56916	-0.0581583	4.89681e-06	0.012373	0.215122	1.15211e-10	1.95267e-09	5	Small_Intestine_Terminal_Ileum
ENSG00000275371	AC012645.4	-4.7785	-0.0368238	1.76605e-06	0.0378441	0.313645	9.40144e-16	3.27466e-14	19	Small_Intestine_Terminal_Ileum
ENSG00000131484	AC091132.1	6.80122	0.148831	1.03739e-11	0.00391704	0.134476	6.46279e-07	5.59596e-06	2	Small_Intestine_Terminal_Ileum
ENSG00000260911	AC135050.3	-5.2034	-0.0873541	1.95674e-07	0.00784462	0.264628	3.84748e-13	9.34308e-12	5	Small_Intestine_Terminal_Ileum
ENSG00000170425	ADORA2B	5.28485	0.0382566	1.25805e-07	0.0385276	0.113799	5.31604e-06	3.78482e-05	1	Small_Intestine_Terminal_Ileum
ENSG00000228696	ARL17B	-9.21111	-0.116941	3.22764e-20	0.0119401	0.337977	4.06856e-17	1.65601e-15	1	Small_Intestine_Terminal_Ileum
ENSG00000163749	CCDC158	-4.941	-0.0327857	7.77228e-07	0.0449373	0.051208	0.00267749	0.00944706	5	Small_Intestine_Terminal_Ileum
ENSG00000262372	CR936218.1	7.85882	0.141235	3.87771e-15	0.00596018	0.0234492	0.0436649	0.10179	6	Small_Intestine_Terminal_Ileum
ENSG00000145214	DGKQ	-9.56532	-0.488772	1.11856e-21	0.000646805	0.186109	2.79944e-09	3.75079e-08	4	Small_Intestine_Terminal_Ileum
ENSG00000232300	FAM215B	-7.37707	-0.0825592	1.61807e-13	0.0154217	0.0325956	0.0171267	0.0462108	3	Small_Intestine_Terminal_Ileum
ENSG00000099377	HSD3B7	-6.19065	-0.31725	5.99161e-10	0.000767355	0.180163	5.31607e-09	6.80046e-08	2	Small_Intestine_Terminal_Ileum
ENSG00000127415	IDUA	-8.76381	-0.162601	1.88755e-18	0.00546427	0.130231	9.99091e-07	8.32227e-06	3	Small_Intestine_Terminal_Ileum
ENSG00000080854	IGSF9B	-5.06067	-0.0621632	4.17775e-07	0.0141706	0.0426895	0.00623112	0.0196123	2	Small_Intestine_Terminal_Ileum
ENSG00000120071	KANSL1	-5.76427	-0.086945	8.20121e-09	0.00888946	0.251527	1.79993e-12	3.88766e-11	11	Small_Intestine_Terminal_Ileum
ENSG00000214401	KANSL1-AS1	-9.4057	-0.0548917	5.16873e-21	0.0564955	0.569897	2.46026e-33	1.05747e-30	6	Small_Intestine_Terminal_Ileum
ENSG00000103510	KAT8	-4.97835	-0.0291793	6.41302e-07	0.0622813	0.188982	2.05043e-09	2.80317e-08	3	Small_Intestine_Terminal_Ileum
ENSG00000122550	KLHL7	-4.89029	-0.0524758	1.0069e-06	0.0179796	0.0614482	0.000974044	0.00391469	5	Small_Intestine_Terminal_Ileum
ENSG00000230658	KLHL7-DT	-5.13728	-0.0108075	2.78744e-07	0.463779	0.526736	9.53689e-30	1.84646e-27	12	Small_Intestine_Terminal_Ileum
ENSG00000176681	LRRC37A	-9.21111	-0.138527	3.22764e-20	0.00850891	0.507197	3.15093e-28	5.09148e-26	1	Small_Intestine_Terminal_Ileum
ENSG00000136243	NUPL2	5.27727	0.0511748	1.3112e-07	0.0207174	0.148018	1.59236e-07	1.55552e-06	5	Small_Intestine_Terminal_Ileum
ENSG00000117280	RAB29	6.10053	0.0187672	1.05718e-09	0.236079	0.229091	2.38666e-11	4.36602e-10	9	Small_Intestine_Terminal_Ileum
ENSG00000099381	SETD1A	-5.67874	-98.108	1.3569e-08	7.43896e-09	0.0400377	0.00811548	0.024513	1	Small_Intestine_Terminal_Ileum
ENSG00000099365	STX1B	-5.67874	-1.00708	1.3569e-08	7.05984e-05	0.106066	1.15891e-05	7.60258e-05	1	Small_Intestine_Terminal_Ileum
ENSG00000103496	STX4	-5.67874	-0.229123	1.3569e-08	0.0013639	0.07389	0.000285222	0.00133428	1	Small_Intestine_Terminal_Ileum
ENSG00000127419	TMEM175	-6.8002	-0.132672	1.04475e-11	0.00449486	0.0394536	0.00860277	0.0257711	1	Small_Intestine_Terminal_Ileum
ENSG00000011295	TTC19	-4.60624	-0.0178223	4.10014e-06	0.135348	0.279702	6.30994e-14	1.7079e-12	11	Small_Intestine_Terminal_Ileum
ENSG00000108379	WNT3	-7.95762	-0.0571931	1.75378e-15	0.0420705	0.0999378	2.14274e-05	0.000132251	4	Small_Intestine_Terminal_Ileum
ENSG00000167395	ZNF646	-4.71019	-0.0566836	2.47483e-06	0.0151659	0.0979194	2.62209e-05	0.000158335	5	Small_Intestine_Terminal_Ileum
ENSG00000167394	ZNF668	5.10378	0.0715497	3.32937e-07	0.010813	0.055838	0.0016945	0.00635431	4	Small_Intestine_Terminal_Ileum
ENSG00000214941	ZSWIM7	-5.27248	-0.0143372	1.3459e-07	0.271716	0.314321	8.62903e-16	3.03017e-14	6	Small_Intestine_Terminal_Ileum
ENSG00000227782	AC002553.1	4.62264	0.134509	3.78889e-06	0.00242418	0.0250443	0.017022	0.0341872	6	Spleen
ENSG00000272308	AC104113.1	5.07017	0.0465571	3.97467e-07	0.0246448	0.0447602	0.00134435	0.00344177	1	Spleen
ENSG00000260911	AC135050.3	-5.36004	-0.0152447	8.3203e-08	0.273727	0.26701	6.7687e-17	9.54925e-16	11	Spleen
ENSG00000170425	ADORA2B	5.2682	0.0303179	1.37767e-07	0.0609822	0.40469	3.78141e-27	1.33189e-25	6	Spleen
ENSG00000228696	ARL17B	-9.21111	-0.135233	3.22764e-20	0.00892853	0.444921	1.37648e-30	6.428e-29	1	Spleen
ENSG00000262372	CR936218.1	9.25629	0.929528	2.11666e-20	0.00018366	0.017056	0.0493878	0.0885835	1	Spleen
ENSG00000145214	DGKQ	-9.3755	-0.0929855	6.88461e-21	0.0179735	0.607755	1.28095e-47	3.20715e-45	17	Spleen
ENSG00000049167	ERCC8	5.28958	0.0305623	1.22598e-07	0.0599429	0.0865493	6.53943e-06	2.57232e-05	5	Spleen
ENSG00000189157	FAM47E	-5.46176	-0.0295016	4.71424e-08	0.0712913	0.353972	3.98808e-23	9.64799e-22	10	Spleen
ENSG00000089280	FUS	-4.98914	-0.279725	6.06478e-07	0.000663662	0.0258452	0.0153261	0.03113	4	Spleen
ENSG00000177628	GBA	6.41905	0.0473923	1.37126e-10	0.0340966	0.108994	3.57904e-07	1.69847e-06	17	Spleen
ENSG00000136235	GPNMB	4.97065	0.202398	6.67277e-07	0.00113696	0.177301	3.60697e-11	2.81368e-10	6	Spleen
ENSG00000127415	IDUA	-6.63279	-0.0452319	3.29399e-11	0.0377498	0.235126	8.66058e-15	9.91055e-14	13	Spleen
ENSG00000080854	IGSF9B	-4.63582	-0.0331685	3.5553e-06	0.041543	0.215084	1.65937e-13	1.67232e-12	7	Spleen
ENSG00000120071	KANSL1	-6.33119	-0.0814517	2.43271e-10	0.0122279	0.366775	4.12299e-24	1.09285e-22	6	Spleen
ENSG00000214401	KANSL1-AS1	-9.31331	-0.0583104	1.23904e-20	0.0491424	0.517859	1.67323e-37	1.38532e-35	6	Spleen
ENSG00000103510	KAT8	-5.02566	-0.029148	5.01699e-07	0.0632659	0.158106	5.10176e-10	3.5071e-09	4	Spleen
ENSG00000230658	KLHL7-DT	-5.08288	-0.0099789	3.71757e-07	0.528146	0.628548	2.7488e-50	8.92543e-48	8	Spleen
ENSG00000176681	LRRC37A	-9.21111	-0.149967	3.22764e-20	0.00726022	0.552574	3.62028e-41	4.45166e-39	1	Spleen
ENSG00000238083	LRRC37A2	-8.6112	-0.0383557	7.23004e-18	0.102103	0.487414	1.6912e-34	1.08472e-32	16	Spleen
ENSG00000186868	MAPT	-10.0578	-0.0481328	8.48557e-24	0.0865382	0.0829377	1.03943e-05	3.95178e-05	5	Spleen
ENSG00000141027	NCOR1	5.02476	0.128101	5.04065e-07	0.00312479	0.039203	0.00273202	0.00656804	4	Spleen
ENSG00000073969	NSF	5.03179	0.101228	4.85924e-07	0.0048643	0.0210102	0.0290089	0.0549731	3	Spleen
ENSG00000136243	NUPL2	5.08833	0.0461763	3.61226e-07	0.023658	0.361777	1.00524e-23	2.55379e-22	8	Spleen
ENSG00000225190	PLEKHM1	-8.45071	-0.0628331	2.89528e-17	0.0327551	0.0860328	6.98794e-06	2.7358e-05	7	Spleen
ENSG00000117280	RAB29	5.92541	0.0172077	3.11518e-09	0.264456	0.15196	1.1782e-09	7.76539e-09	12	Spleen
ENSG00000103549	RNF40	5.80293	0.0237643	6.51671e-09	0.119045	0.0683224	6.72116e-05	0.000221808	5	Spleen
ENSG00000145335	SNCA	5.01403	0.0551424	5.33029e-07	0.0193467	0.0396622	0.00257623	0.00622882	3	Spleen
ENSG00000103496	STX4	-5.67874	-0.158482	1.3569e-08	0.00285075	0.16159	3.16652e-10	2.2329e-09	1	Spleen
ENSG00000127419	TMEM175	-5.37852	-0.0580077	7.50987e-08	0.0146495	0.0497361	0.000713737	0.00193632	5	Spleen
ENSG00000108379	WNT3	-8.45766	-0.0645943	2.72794e-17	0.0373801	0.112054	2.39943e-07	1.16856e-06	4	Spleen
ENSG00000167395	ZNF646	-4.67963	-0.113197	2.87399e-06	0.00382167	0.110357	2.99553e-07	1.43665e-06	5	Spleen
ENSG00000214941	ZSWIM7	-5.57474	-0.0145746	2.47904e-08	0.299024	0.51671	2.18951e-37	1.78432e-35	11	Spleen
ENSG00000275263	AC135048.3	6.19709	0.246545	5.75152e-10	0.00134021	0.060808	7.08705e-06	2.9114e-05	2	Stomach
ENSG00000260911	AC135050.3	-5.71462	-0.0333235	1.09947e-08	0.0638406	0.181805	9.5939e-16	1.24052e-14	7	Stomach
ENSG00000170425	ADORA2B	5.22261	0.02997	1.7642e-07	0.061446	0.395821	4.11722e-37	2.32857e-35	8	Stomach
ENSG00000185829	ARL17A	-5.40209	-0.0409013	6.58707e-08	0.0389676	0.393787	7.08994e-37	3.89127e-35	17	Stomach
ENSG00000228696	ARL17B	4.6147	0.03008	3.93667e-06	0.0426343	0.462225	2.75641e-45	2.55808e-43	11	Stomach
ENSG00000196118	CCDC189	6.18935	0.0637416	6.04126e-10	0.0213659	0.0219184	0.0076009	0.0168591	5	Stomach
ENSG00000138769	CDKL2	5.90224	0.158444	3.58602e-09	0.00277863	0.0120226	0.0486116	0.0876769	4	Stomach
ENSG00000262372	CR936218.1	9.49779	0.363074	2.14399e-21	0.00129078	0.0393978	0.000324616	0.000992316	3	Stomach
ENSG00000145214	DGKQ	-5.66875	-0.0466195	1.43845e-08	0.0285561	0.477424	2.68456e-47	2.77477e-45	8	Stomach
ENSG00000143590	EFNA3	5.36098	0.375585	8.27712e-08	0.000383286	0.0133445	0.0376857	0.0701011	5	Stomach
ENSG00000189157	FAM47E	-5.30836	-0.020945	1.10617e-07	0.128741	0.389163	2.42358e-36	1.27861e-34	14	Stomach
ENSG00000136235	GPNMB	4.9359	0.61769	7.9782e-07	0.000132063	0.0668104	2.41746e-06	1.07369e-05	3	Stomach
ENSG00000179344	HLA-DQB1	-4.81207	-0.681454	1.49376e-06	9.19174e-05	0.646473	1.09059e-74	1.01212e-71	1	Stomach
ENSG00000127415	IDUA	-8.39169	-0.0849307	4.79199e-17	0.0179525	0.189243	2.16289e-16	2.94202e-15	5	Stomach
ENSG00000214401	KANSL1-AS1	-7.46657	-0.0693031	8.23114e-14	0.0222218	0.602442	1.82091e-66	6.75955e-64	6	Stomach
ENSG00000103510	KAT8	-4.91814	-0.0239879	8.73705e-07	0.0887889	0.292169	5.62827e-26	1.55287e-24	5	Stomach
ENSG00000122550	KLHL7	-5.13903	-0.0569622	2.76158e-07	0.0192219	0.0369558	0.000502471	0.00147827	3	Stomach
ENSG00000230658	KLHL7-DT	-5.08094	-0.0105781	3.75568e-07	0.469807	0.482859	4.95964e-48	5.50332e-46	8	Stomach
ENSG00000176681	LRRC37A	-9.21111	-0.15148	3.22764e-20	0.00711593	0.453524	3.68725e-44	3.09805e-42	1	Stomach
ENSG00000238083	LRRC37A2	-9.19931	-0.032232	3.60252e-20	0.161773	0.515971	1.13337e-52	1.62958e-50	15	Stomach
ENSG00000088899	LZTS3	-5.39782	-0.0483973	6.74542e-08	0.0252124	0.0328281	0.00105331	0.00287199	14	Stomach
ENSG00000138722	MMRN1	8.11776	0.219571	4.74856e-16	0.00267029	0.060042	8.1281e-06	3.30515e-05	2	Stomach
ENSG00000073969	NSF	4.86277	0.0843507	1.15757e-06	0.00657361	0.0433652	0.000159777	0.00051995	5	Stomach
ENSG00000136243	NUPL2	5.1305	0.0489986	2.88974e-07	0.0213453	0.128353	3.0175e-11	2.48521e-10	7	Stomach
ENSG00000225190	PLEKHM1	-8.52277	-0.1005	1.55786e-17	0.0129095	0.0320032	0.00122164	0.0032849	3	Stomach
ENSG00000156858	PRR14	5.43377	0.179413	5.51768e-08	0.00231072	0.018859	0.0133579	0.027855	3	Stomach
ENSG00000117280	RAB29	5.96863	0.017192	2.39252e-09	0.269699	0.316013	2.17628e-28	6.8782e-27	15	Stomach
ENSG00000099381	SETD1A	-4.83166	-0.0433805	1.35398e-06	0.0252537	0.0373015	0.00047232	0.00139739	11	Stomach
ENSG00000107295	SH3GL2	5.03086	0.0285239	4.88277e-07	0.0607848	0.181001	1.12608e-15	1.44416e-14	6	Stomach
ENSG00000099365	STX1B	-5.71204	-0.0508532	1.1163e-08	0.0271451	0.134139	1.01115e-11	8.79623e-11	4	Stomach
ENSG00000011295	TTC19	-5.23857	-0.0552779	1.61824e-07	0.0184868	0.207341	5.46039e-18	8.48439e-17	1	Stomach
ENSG00000108379	WNT3	-8.57202	-0.065255	1.01681e-17	0.0376242	0.14381	1.60313e-12	1.51884e-11	6	Stomach
ENSG00000167394	ZNF668	5.20995	0.512221	1.88895e-07	0.000220681	0.0275786	0.00271296	0.00670588	1	Stomach
ENSG00000260911	AC135050.3	-4.78661	-0.0500131	1.69624e-06	0.0200517	0.187263	5.93842e-32	5.83264e-31	7	Whole_Blood
ENSG00000145214	DGKQ	-7.69265	-0.0504289	1.44117e-14	0.0429942	0.627778	1.73008e-145	4.94486e-143	18	Whole_Blood
ENSG00000136235	GPNMB	6.04877	0.108335	1.45957e-09	0.00602158	0.0541513	1.08733e-09	3.58933e-09	5	Whole_Blood
ENSG00000127415	IDUA	-6.34475	-0.0413288	2.22786e-10	0.0438866	0.175811	6.55867e-30	5.97316e-29	24	Whole_Blood
ENSG00000080854	IGSF9B	-4.81332	-0.0380169	1.48443e-06	0.0339332	0.100727	3.8196e-17	1.96704e-16	11	Whole_Blood
ENSG00000120071	KANSL1	-7.8279	-0.0550576	4.9609e-15	0.0399419	0.366219	3.58125e-68	1.13521e-66	18	Whole_Blood
ENSG00000214401	KANSL1-AS1	-9.40951	-0.0562899	4.98457e-21	0.0539214	0.655289	1.23253e-156	5.15528e-154	3	Whole_Blood
ENSG00000103510	KAT8	-4.92288	-0.0318354	8.52806e-07	0.051407	0.0433655	5.32985e-08	1.55155e-07	2	Whole_Blood
ENSG00000122550	KLHL7	-5.01312	-0.0445221	5.35532e-07	0.0261059	0.0374263	4.51268e-07	1.209e-06	7	Whole_Blood
ENSG00000176681	LRRC37A	-9.21111	-1.5984	3.22764e-20	6.39106e-05	0.314815	7.92252e-57	1.8019e-55	1	Whole_Blood
ENSG00000238083	LRRC37A2	-5.91843	-0.0306668	3.25029e-09	0.0807543	0.494732	4.14822e-101	3.57477e-99	35	Whole_Blood
ENSG00000136243	NUPL2	5.33792	0.0634734	9.4021e-08	0.013781	0.069935	3.48543e-12	1.35199e-11	5	Whole_Blood
ENSG00000151006	PRSS53	5.48615	0.0689733	4.10778e-08	0.0135532	0.0450219	2.93543e-08	8.7059e-08	3	Whole_Blood
ENSG00000117280	RAB29	4.95817	0.0172081	7.116e-07	0.181003	0.287594	3.71067e-51	7.08622e-50	9	Whole_Blood
ENSG00000138760	SCARB2	5.92721	0.0298195	3.08131e-09	0.0774159	0.0979118	1.09993e-16	5.49293e-16	15	Whole_Blood
ENSG00000099381	SETD1A	-6.21417	-0.213533	5.15974e-10	0.00182085	0.010315	0.00851872	0.0142455	3	Whole_Blood
ENSG00000103496	STX4	-5.67874	-0.351634	1.3569e-08	0.000579079	0.0119512	0.00461244	0.00801812	1	Whole_Blood
ENSG00000011295	TTC19	-5.23857	-0.045253	1.61824e-07	0.0275848	0.171984	3.11584e-29	2.75715e-28	1	Whole_Blood
ENSG00000108379	WNT3	-7.34545	-0.0537643	2.05074e-13	0.0396825	0.0196714	0.000270902	0.000552994	8	Whole_Blood
ENSG00000167394	ZNF668	5.77765	0.379065	7.57497e-09	0.000494419	0.115178	1.59869e-19	9.26214e-19	2	Whole_Blood
