# Supplementary material for: Joint analysis of proteome, transcriptome, and multi-trait analysis to identify novel Parkinson’s disease risk genes
Source: Aging (Albany NY). 2024 Jan 17;16(2):1555–80. doi: 10.18632/aging.205444 (PMC10866412; doi:10.18632/aging.205444)
Supplement: Supplementary Table 16 [file aging-16-205444-s015.xlsx]

## Sheet: Sheet1
Supplementary Table 16. Seventy-eight expression-trait associations for genes identified in the present PD TWAS and FOCUS fine mapping analysis results of the 78 genes across 22 train tissues (PDMTAG).
Region	Gene name	Type	PD TWAS					FOCUS
			Model	R2	N of SNPs	effect_size	P-value	PIP	TWAS-Z	Region
1q21.3	ADAM15	protein	Brain_Spinal_cord_cervical_c-1	0.314826	16	-0.0177249	1.01979e-06	0.899	-4.76	1:154770403-1:156336133
1q21.3	EFNA3	protein	Brain_Cortex	0.0264934	5	-0.127602	5.31783e-07	0.601	-4.87	1:154770403-1:156336133
1q21.3	EFNA3	protein	Stomach	0.0133445	7	0.375585	8.27712e-08	0.938	4.85	1:154770403-1:156336133
1q22	EFNA1	protein	Brain_Amygdala	0.0558726	1	0.216987	5.16256e-06	0.605	4.34	1:154770403-1:156336133
1q22	EFNA1	protein	Brain_Anterior_cingulate_cortex_BA24	0.0274835	6	0.0405155	1.56861e-06	0.794	4.55	1:154770403-1:156336133
1q22	EFNA1	protein	Brain_Caudate_basal_ganglia	0.143826	1	0.0522997	5.16256e-06	0.606	4.34	1:154770403-1:156336133
1q22	EFNA1	protein	Brain_Cerebellar_Hemisphere	0.177569	10	0.0518604	6.66913e-07	0.89	4.72	1:154770403-1:156336133
1q22	EFNA1	protein	Brain_Cerebellum	0.169818	8	0.0675709	1.05657e-06	0.0507	4.58	1:154770403-1:156336133
1q22	EFNA1	protein	Brain_Cortex	0.0567256	6	0.0542275	5.82496e-07	0.365	4.76	1:154770403-1:156336133
1q22	EFNA1	protein	Brain_Frontal_Cortex_BA9	0.0312402	1	0.0399388	5.16256e-06	0.605	4.34	1:154770403-1:156336133
1q22	EFNA1	protein	Brain_Hippocampus	0.0825491	1	0.0719638	5.16256e-06	0.442	4.34	1:154770403-1:156336133
1q22	EFNA1	protein	Brain_Nucleus_accumbens_basal_ganglia	0.0798245	11	0.0271913	3.61516e-07	0.539	4.28	1:154770403-1:156336133
1q22	EFNA1	protein	Brain_Putamen_basal_ganglia	0.106117	13	0.021789	5.73971e-06	0.0597	3.51	1:154770403-1:156336133
1q22	EFNA1	protein	Brain_Spinal_cord_cervical_c-1	0.142631	7	0.0291968	1.46051e-06	0.0188	3.75	1:154770403-1:156336133
1q22	EFNA1	protein	Brain_Substantia_nigra	0.103838	6	0.0577048	7.35318e-07	0.88	4.73	1:154770403-1:156336133
1q22	EFNA1	protein	Pituitary	0.0212234	7	0.0716366	1.72251e-06	0.761	4.57	1:154770403-1:156336133
1q22	FAM189B	protein	Brain_Cerebellum	0.0204993	4	0.158175	1.69116e-08	0.948	5.24	1:154770403-1:156336133
1q22	GBA	protein	Spleen	0.108994	20	0.0473923	1.37126e-10	1	6.95	1:154770403-1:156336133
1q22	SSR2	protein	Liver	0.030892	1	0.0450505	2.21053e-06	0.613	4.47	1:154770403-1:156336133
1q32.1	NUCKS1	protein	Brain_Anterior_cingulate_cortex_BA24	0.095335	12	-0.0358041	3.53556e-06	0.000314	-4.29	1:204681068-1:205922403
2q24.3	STK39	protein	Brain_Caudate_basal_ganglia	0.0656685	5	-0.0829991	1.5137e-07	0.976	-5.05	2:167356254-2:169968112
2q24.3	STK39	protein	Brain_Nucleus_accumbens_basal_ganglia	0.0851189	10	-0.0660209	3.27144e-07	0.911	-4.77	2:167356254-2:169968112
2q24.3	STK39	protein	Brain_Putamen_basal_ganglia	0.0833798	9	-0.0557782	2.94741e-07	0.958	-4.93	2:167356254-2:169968112
3q27.1	LAMP3	protein	Brain_Putamen_basal_ganglia	0.0340929	8	-0.0861578	8.93682e-09	0.914	-5	3:181511166-3:183769683
4p15.32	FAM200B	protein	Brain_Cerebellar_Hemisphere	0.38673	22	0.0214453	2.65489e-08	0.998	5.64	4:15147446-4:15926136
4p15.32	FAM200B	protein	Brain_Hippocampus	0.189142	16	0.0170341	3.04225e-06	0.793	4.55	4:15147446-4:15926136
4p15.32	FAM200B	protein	Brain_Nucleus_accumbens_basal_ganglia	0.249445	17	0.0170369	5.92869e-07	0.00061	4.89	4:15147446-4:15926136
4p15.32	FAM200B	protein	Brain_Putamen_basal_ganglia	0.155622	18	0.0176018	1.44799e-06	0.000323	4.72	4:15147446-4:15926136
4p16.3	DGKQ	protein	Brain_Anterior_cingulate_cortex_BA24	0.160538	10	0.173791	4.12776e-09	0.000904	6.07	4:695146-4:1478711
4p16.3	DGKQ	protein	Brain_Cerebellar_Hemisphere	0.130992	10	-0.0658061	6.41871e-24	1	-10.4	4:695146-4:1478711
4p16.3	DGKQ	protein	Brain_Cerebellum	0.219367	15	-0.0444746	5.59815e-23	1	-10	4:695146-4:1478711
4p16.3	DGKQ	protein	Brain_Cortex	0.0910993	17	0.102299	4.40819e-10	0.00918	5.8	4:695146-4:1478711
4p16.3	DGKQ	protein	Brain_Frontal_Cortex_BA9	0.264711	9	0.117719	1.93973e-08	0.000658	5.72	4:695146-4:1478711
4p16.3	DGKQ	protein	Brain_Spinal_cord_cervical_c-1	0.170999	5	-0.661834	9.40265e-09	1	-5.48	4:695146-4:1478711
4p16.3	DGKQ	protein	Colon_Sigmoid	0.281221	19	-0.137901	2.37387e-19	1	-8.59	4:695146-4:1478711
4p16.3	DGKQ	protein	Colon_Transverse	0.159067	29	-0.132237	2.71199e-17	1	-7.92	4:695146-4:1478711
4p16.3	DGKQ	protein	Liver	0.169699	18	-0.137629	9.34664e-19	1	-8.39	4:695146-4:1478711
4p16.3	DGKQ	protein	Pancreas	0.354009	20	-0.106346	2.55351e-15	1	-7.78	4:695146-4:1478711
4p16.3	DGKQ	protein	Pituitary	0.18171	21	-0.0964604	1.06784e-11	1	-6.8	4:695146-4:1478711
4p16.3	DGKQ	protein	Small_Intestine_Terminal_Ileum	0.186109	9	-0.488772	1.11856e-21	1	-8.97	4:695146-4:1478711
4p16.3	DGKQ	protein	Spleen	0.607755	30	-0.0929855	6.88461e-21	1	-9.22	4:695146-4:1478711
4p16.3	DGKQ	protein	Stomach	0.477424	13	-0.0466195	1.43845e-08	0.00136	-4.77	4:695146-4:1478711
4p16.3	DGKQ	protein	Whole_Blood	0.627778	38	-0.0504289	1.44117e-14	1	-8.03	4:695146-4:1478711
4p16.3	SLC26A1	protein	Brain_Cerebellar_Hemisphere	0.393525	11	0.0132031	7.67558e-07	0.000243	3.07	4:695146-4:1478711
4q21.1	CCDC158	protein	Brain_Spinal_cord_cervical_c-1	0.198984	2	-0.0505441	2.75861e-06	0.00764	-4.49	4:77130707-4:79093979
4q21.1	CCDC158	protein	Small_Intestine_Terminal_Ileum	0.051208	5	-0.0327857	7.77228e-07	0.83	-4.67	4:77130707-4:79093979
4q21.1	CDKL2	protein	Stomach	0.0120226	6	0.158444	3.58602e-09	0.957	6.05	4:77130707-4:79093979
4q22.1	NDUFAF2	protein	Brain_Cortex	0.0693051	4	0.0694183	4.41223e-09	0.998	5.65	5:58524622-5:60935451
4q22.1	NDUFAF2	protein	Brain_Hippocampus	0.0662406	3	0.0672604	5.2749e-09	0.999	5.6	5:58524622-5:60935451
4q22.1	NDUFAF2	protein	Brain_Nucleus_accumbens_basal_ganglia	0.0283271	2	0.0677355	2.75187e-09	0.999	5.75	5:58524622-5:60935451
4q22.1	NDUFAF2	protein	Brain_Putamen_basal_ganglia	0.0622328	3	0.0751462	1.92454e-09	1	5.83	5:58524622-5:60935451
4q22.1	NDUFAF2	protein	Brain_Substantia_nigra	0.0420411	2	0.166476	8.9353e-09	0.997	5.48	5:58524622-5:60935451
4q22.1	SNCA-AS1	protein	Brain_Cerebellar_Hemisphere	0.220162	16	-0.0131728	3.12664e-06	0.944	-5.32	4:90231746-4:91560677
5q12.1	ERCC8	protein	Spleen	0.0865493	6	0.0305623	1.22598e-07	0.593	4.93	5:58524622-5:60935451
5q12.1	NDUFAF2	protein	Pancreas	0.0298521	21	0.082698	1.90592e-07	0.994	5.67	5:58524622-5:60935451
6p21.32	BTNL2	protein	Brain_Spinal_cord_cervical_c-1	0.0614721	19	0.0482236	3.15701e-06	0.881	4.73	6:31571337-6:32682664
6p21.32	HLA-DQB1	protein	Brain_Cortex	0.519005	24	-0.0691986	1.49376e-06	0.909	-4.77	6:31571337-6:32682664
6p21.32	HLA-DQB1	protein	Stomach	0.646473	13	-0.681454	1.49376e-06	0.911	-4.77	6:31571337-6:32682664
7p15.3	KLHL7	protein	Brain_Caudate_basal_ganglia	0.0989166	19	-0.0530611	2.44351e-06	0.024	-3.89	7:22508611-7:23469560
7p15.3	KLHL7	protein	Brain_Nucleus_accumbens_basal_ganglia	0.039324	10	-0.0505041	3.82947e-06	0.0455	-3.82	7:22508611-7:23469560
7p15.3	KLHL7	protein	Pancreas	0.0729084	8	-0.0280597	7.48543e-07	0.109	-4.71	7:22508611-7:23469560
7p15.3	KLHL7	protein	Small_Intestine_Terminal_Ileum	0.0614482	6	-0.0524758	1.0069e-06	0.186	-4.81	7:22508611-7:23469560
7p15.3	KLHL7	protein	Stomach	0.0369558	7	-0.0569622	2.76158e-07	0.0561	-4.05	7:22508611-7:23469560
7p15.3	KLHL7	protein	Whole_Blood	0.0374263	13	-0.0445221	5.35532e-07	0.00593	-4.86	7:22508611-7:23469560
7p15.3	KLHL7-DT	protein	Brain_Anterior_cingulate_cortex_BA24	0.589979	6	-0.013226	1.39776e-07	0.76	-5.14	7:22508611-7:23469560
7p15.3	KLHL7-DT	protein	Brain_Caudate_basal_ganglia	0.583132	12	-0.0115036	3.18339e-07	0.218	-4.57	7:22508611-7:23469560
7p15.3	KLHL7-DT	protein	Brain_Cerebellar_Hemisphere	0.464178	7	-0.0119098	2.6832e-07	0.476	-4.82	7:22508611-7:23469560
7p15.3	KLHL7-DT	protein	Brain_Cerebellum	0.449882	10	-0.0121915	2.74897e-07	0.919	-4.79	7:22508611-7:23469560
7p15.3	KLHL7-DT	protein	Brain_Cortex	0.610751	12	-0.0115254	3.34469e-07	0.0705	-4.6	7:22508611-7:23469560
7p15.3	KLHL7-DT	protein	Brain_Frontal_Cortex_BA9	0.580003	12	-0.0115729	3.39458e-07	0.173	-4.56	7:22508611-7:23469560
7p15.3	KLHL7-DT	protein	Brain_Hippocampus	0.668511	11	-0.0114953	3.3892e-07	0.202	-4.63	7:22508611-7:23469560
7p15.3	KLHL7-DT	protein	Brain_Hypothalamus	0.564206	8	-0.0116064	3.14985e-07	0.652	-4.73	7:22508611-7:23469560
7p15.3	KLHL7-DT	protein	Brain_Nucleus_accumbens_basal_ganglia	0.567165	8	-0.0116343	3.17e-07	0.686	-4.73	7:22508611-7:23469560
7p15.3	KLHL7-DT	protein	Brain_Putamen_basal_ganglia	0.499676	8	-0.012658	2.01252e-07	0.691	-4.97	7:22508611-7:23469560
7p15.3	KLHL7-DT	protein	Brain_Spinal_cord_cervical_c-1	0.618307	8	-0.0114194	3.39434e-07	0.0177	-4.69	7:22508611-7:23469560
7p15.3	KLHL7-DT	protein	Brain_Substantia_nigra	0.586534	8	-0.0118595	2.81756e-07	0.86	-4.79	7:22508611-7:23469560
7p15.3	KLHL7-DT	protein	Pituitary	0.616595	13	-0.0115557	3.37387e-07	0.0863	-4.49	7:22508611-7:23469560
7p15.3	MALSU1	protein	Liver	0.0490631	2	0.205787	5.67777e-08	0.44	5.18	7:22508611-7:23469560
9p22.2	SH3GL2	protein	Brain_Anterior_cingulate_cortex_BA24	0.0844358	4	0.0624055	3.05277e-06
9p22.2	SH3GL2	protein	Brain_Frontal_Cortex_BA9	0.115384	4	0.0283616	4.09327e-06
9p22.2	SH3GL2	protein	Stomach	0.181001	9	0.0285239	4.88277e-07
11q25	IGSF9B	protein	Brain_Cerebellar_Hemisphere	0.0271893	3	-0.0650476	2.96432e-07	0.945	-4.88	11:133000260-11:134205993
11q25	IGSF9B	protein	Brain_Cerebellum	0.247618	4	-0.0546321	6.83077e-07	0.892	-4.72	11:133000260-11:134205993
11q25	IGSF9B	protein	Brain_Cortex	0.0757393	6	-0.120685	5.0742e-07	0.381	-4.12	11:133000260-11:134205993
11q25	IGSF9B	protein	Brain_Hippocampus	0.0414598	1	-0.166799	2.38067e-07	0.954	-4.92	11:133000260-11:134205993
11q25	IGSF9B	protein	Colon_Transverse	0.127015	15	-0.0358912	3.29591e-06	0.442	-4.21	11:133000260-11:134205993
11q25	IGSF9B	protein	Pituitary	0.320641	7	-0.0588183	7.34728e-07	0.659	-4.39	11:133000260-11:134205993
11q25	IGSF9B	protein	Small_Intestine_Terminal_Ileum	0.0426895	3	-0.0621632	4.17775e-07	0.927	-4.82	11:133000260-11:134205993
11q25	IGSF9B	protein	Spleen	0.215084	9	-0.0331685	3.5553e-06	0.623	-4.36	11:133000260-11:134205993
11q25	IGSF9B	protein	Whole_Blood	0.100727	16	-0.0380169	1.48443e-06	0.646	-4.38	11:133000260-11:134205993
12q24.31	CCDC62	protein	Brain_Cerebellar_Hemisphere	0.0988312	5	0.0858489	1.11408e-09	0.999	5.64	12:122009763-12:124976982
12q24.31	CCDC62	protein	Brain_Cerebellum	0.111884	5	0.112823	4.98045e-09	0.996	5.41	12:122009763-12:124976982
12q24.31	VPS37B	protein	Pancreas	0.0690075	6	-0.101505	9.31181e-08	0.466	-4.21	12:122009763-12:124976982
16p11.2	BCL7C	protein	Brain_Cortex	0.0713852	8	-0.177702	6.43965e-09	0.0123	-5.23	16:29036613-16:31382470
16p11.2	BCL7C	protein	Brain_Nucleus_accumbens_basal_ganglia	0.0672443	8	-0.170252	1.45905e-08	0.0563	-5.15	16:29036613-16:31382470
16p11.2	BCL7C	protein	Pancreas	0.0291511	4	-0.296716	1.01407e-06	0.00282	-4.49	16:29036613-16:31382470
16p11.2	FBXL19	protein	Brain_Substantia_nigra	0.0401061	5	-0.0686445	1.16856e-10	0.966	-6.18	16:29036613-16:31382470
16p11.2	FUS	protein	Spleen	0.0258452	7	-0.279725	6.06478e-07	0.0103	-4.57	16:29036613-16:31382470
16p11.2	KAT8	protein	Brain_Amygdala	0.157045	4	-0.0291641	8.52911e-07	0.00109	-4.68	16:29036613-16:31382470
16p11.2	KAT8	protein	Brain_Anterior_cingulate_cortex_BA24	0.180977	9	-0.0218871	3.33531e-06	0.000513	-3.92	16:29036613-16:31382470
16p11.2	KAT8	protein	Brain_Caudate_basal_ganglia	0.204582	10	-0.0257769	7.41288e-07	0.00188	-4.68	16:29036613-16:31382470
16p11.2	KAT8	protein	Brain_Cerebellar_Hemisphere	0.361796	13	-0.051227	5.17106e-07	0.000792	-4.95	16:29036613-16:31382470
16p11.2	KAT8	protein	Brain_Cerebellum	0.400926	9	-0.0255152	1.90481e-06	0.00105	-4.33	16:29036613-16:31382470
16p11.2	KAT8	protein	Brain_Cortex	0.364206	7	-0.02569	6.8483e-07	0.00135	-4.68	16:29036613-16:31382470
16p11.2	KAT8	protein	Brain_Frontal_Cortex_BA9	0.26052	10	-0.0250381	7.74963e-07	0.00136	-4.68	16:29036613-16:31382470
16p11.2	KAT8	protein	Brain_Hippocampus	0.211674	10	-0.025129	7.73804e-07	0.00286	-4.68	16:29036613-16:31382470
16p11.2	KAT8	protein	Brain_Hypothalamus	0.22512	9	-0.0259389	7.1061e-07	0.00234	-4.69	16:29036613-16:31382470
16p11.2	KAT8	protein	Brain_Nucleus_accumbens_basal_ganglia	0.252309	10	-0.0249245	7.98648e-07	0.00662	-4.67	16:29036613-16:31382470
16p11.2	KAT8	protein	Brain_Putamen_basal_ganglia	0.250113	9	-0.0261064	6.81494e-07	0.00526	-4.69	16:29036613-16:31382470
16p11.2	KAT8	protein	Brain_Spinal_cord_cervical_c-1	0.13613	7	-0.0271576	7.35102e-07	0.0058	-4.68	16:29036613-16:31382470
16p11.2	KAT8	protein	Brain_Substantia_nigra	0.128751	7	-0.0278401	8.6475e-07	0.000577	-4.62	16:29036613-16:31382470
16p11.2	KAT8	protein	Colon_Sigmoid	0.258065	9	-0.0256931	6.64145e-07	0.00583	-4.71	16:29036613-16:31382470
16p11.2	KAT8	protein	Colon_Transverse	0.341275	17	-0.0222367	3.34679e-07	0.0182	-4.84	16:29036613-16:31382470
16p11.2	KAT8	protein	Liver	0.190491	14	-0.0226256	1.48564e-06	0.00113	-4.69	16:29036613-16:31382470
16p11.2	KAT8	protein	Pancreas	0.212471	14	-0.022949	1.54759e-06	0.00586	-4.68	16:29036613-16:31382470
16p11.2	KAT8	protein	Pituitary	0.341635	8	-0.0289529	6.89572e-07	0.0249	-4.73	16:29036613-16:31382470
16p11.2	KAT8	protein	Small_Intestine_Terminal_Ileum	0.188982	7	-0.0291793	6.41302e-07	0.00388	-4.74	16:29036613-16:31382470
16p11.2	KAT8	protein	Spleen	0.158106	9	-0.029148	5.01699e-07	0.0228	-4.77	16:29036613-16:31382470
16p11.2	KAT8	protein	Stomach	0.292169	10	-0.0239879	8.73705e-07	0.00196	-4.71	16:29036613-16:31382470
16p11.2	KAT8	protein	Whole_Blood	0.0433655	5	-0.0318354	8.52806e-07	0.00356	-4.71	16:29036613-16:31382470
16p11.2	MIR762HG	protein	Brain_Cortex	0.0441703	4	-0.195423	6.60992e-07	0.00101	-4.19	16:29036613-16:31382470
16p11.2	ORAI3	protein	Brain_Nucleus_accumbens_basal_ganglia	0.0903304	18	0.0248289	4.04304e-09	0.0259	4.99	16:29036613-16:31382470
16p11.2	PHKG2	protein	Colon_Sigmoid	0.0231041	3	1.32011	5.13524e-09	0.241	5.54	16:29036613-16:31382470
16p11.2	PHKG2	protein	Pancreas	0.0449043	2	0.240975	1.53911e-08	0.128	5.36	16:29036613-16:31382470
16p11.2	PRR14	protein	Brain_Anterior_cingulate_cortex_BA24	0.0607073	4	0.207852	1.01239e-08	0.0506	5.28	16:29036613-16:31382470
16p11.2	PRR14	protein	Colon_Sigmoid	0.0331618	5	0.165784	5.04633e-08	0.00805	4.72	16:29036613-16:31382470
16p11.2	PRR14	protein	Pituitary	0.0414232	6	0.114842	1.70231e-07	0.00451	4.31	16:29036613-16:31382470
16p11.2	PRR14	protein	Stomach	0.018859	5	0.179413	5.51768e-08	0.00283	4.71	16:29036613-16:31382470
16p11.2	PRSS36	protein	Brain_Amygdala	0.158715	3	-0.0182199	3.52656e-07	0.000765	-4.56	16:29036613-16:31382470
16p11.2	PRSS36	protein	Brain_Caudate_basal_ganglia	0.378862	5	-0.0161461	1.33377e-06	0.000938	-4.42	16:29036613-16:31382470
16p11.2	PRSS36	protein	Brain_Cerebellar_Hemisphere	0.276438	6	-0.0158937	1.58852e-06	0.000333	-4.39	16:29036613-16:31382470
16p11.2	PRSS36	protein	Brain_Cerebellum	0.419827	6	-0.0158797	1.61352e-06	0.00119	-4.38	16:29036613-16:31382470
16p11.2	PRSS36	protein	Brain_Hippocampus	0.215981	3	-0.0169612	8.86502e-07	0.00147	-4.46	16:29036613-16:31382470
16p11.2	PRSS36	protein	Brain_Hypothalamus	0.253638	4	-0.0165546	1.1071e-06	0.00113	-4.44	16:29036613-16:31382470
16p11.2	PRSS36	protein	Brain_Nucleus_accumbens_basal_ganglia	0.39973	6	-0.015658	2.10581e-06	0.00203	-4.32	16:29036613-16:31382470
16p11.2	PRSS36	protein	Brain_Spinal_cord_cervical_c-1	0.046826	6	-0.0160549	1.71734e-06	0.00188	-4.37	16:29036613-16:31382470
16p11.2	PRSS36	protein	Liver	0.037392	6	-0.0438544	2.25749e-07	0.000833	-4.58	16:29036613-16:31382470
16p11.2	PRSS53	protein	Brain_Amygdala	0.0362955	10	0.226379	4.36736e-07	0.00323	4.92	16:29036613-16:31382470
16p11.2	PRSS53	protein	Colon_Transverse	0.0222127	11	0.143727	3.19335e-06	0.000515	3.8	16:29036613-16:31382470
16p11.2	PRSS53	protein	Whole_Blood	0.0450219	5	0.0689733	4.10778e-08	0.0256	5.16	16:29036613-16:31382470
16p11.2	SETD1A	protein	Brain_Cerebellar_Hemisphere	0.0520684	5	-0.768965	1.77135e-08	0.00219	-5.24	16:29036613-16:31382470
16p11.2	SETD1A	protein	Brain_Cerebellum	0.0651829	9	-0.410826	8.70981e-08	0.0163	-5.07	16:29036613-16:31382470
16p11.2	SETD1A	protein	Liver	0.0235688	7	-1.25518	6.76406e-10	0.0818	-5.76	16:29036613-16:31382470
16p11.2	SETD1A	protein	Small_Intestine_Terminal_Ileum	0.0400377	4	-98.108	1.3569e-08	0.0675	-5.39	16:29036613-16:31382470
16p11.2	SETD1A	protein	Stomach	0.0373015	17	-0.0433805	1.35398e-06	0.00198	-4.48	16:29036613-16:31382470
16p11.2	SETD1A	protein	Whole_Blood	0.010315	7	-0.213533	5.15974e-10	0.768	-5.8	16:29036613-16:31382470
16p11.2	SRCAP	protein	Brain_Nucleus_accumbens_basal_ganglia	0.0294476	2	-0.148471	1.41849e-08	0.21	-5.42	16:29036613-16:31382470
16p11.2	STX1B	protein	Brain_Cerebellar_Hemisphere	0.097393	14	-0.0622555	1.44373e-08	0.000859	-5	16:29036613-16:31382470
16p11.2	STX1B	protein	Colon_Sigmoid	0.0231323	4	-0.127911	3.77998e-08	0.0341	-5.15	16:29036613-16:31382470
16p11.2	STX1B	protein	Colon_Transverse	0.0915662	6	-0.0709847	2.63566e-09	0.839	-5.62	16:29036613-16:31382470
16p11.2	STX1B	protein	Liver	0.0446338	5	-0.0760449	9.19931e-09	0.00804	-5.32	16:29036613-16:31382470
16p11.2	STX1B	protein	Small_Intestine_Terminal_Ileum	0.106066	4	-1.00708	1.3569e-08	0.0675	-5.39	16:29036613-16:31382470
16p11.2	STX1B	protein	Stomach	0.134139	8	-0.0508532	1.1163e-08	0.0179	-5.27	16:29036613-16:31382470
16p11.2	STX4	protein	Brain_Amygdala	0.0695574	3	0.110746	1.3569e-08	0.0273	5.39	16:29036613-16:31382470
16p11.2	STX4	protein	Brain_Anterior_cingulate_cortex_BA24	0.151061	3	0.118627	1.3569e-08	0.0799	5.39	16:29036613-16:31382470
16p11.2	STX4	protein	Brain_Caudate_basal_ganglia	0.0420942	4	0.0732012	7.73461e-09	0.0448	5.42	16:29036613-16:31382470
16p11.2	STX4	protein	Brain_Cerebellar_Hemisphere	0.0339033	4	-0.72337	1.3569e-08	0.00436	-5.39	16:29036613-16:31382470
16p11.2	STX4	protein	Brain_Cortex	0.0694044	4	0.11107	7.60052e-09	0.0333	5.42	16:29036613-16:31382470
16p11.2	STX4	protein	Brain_Frontal_Cortex_BA9	0.164641	4	0.120093	1.03096e-08	0.0349	5.41	16:29036613-16:31382470
16p11.2	STX4	protein	Brain_Hippocampus	0.0380813	2	0.197885	1.3569e-08	0.0736	5.39	16:29036613-16:31382470
16p11.2	STX4	protein	Brain_Hypothalamus	0.196714	5	0.120638	6.9811e-09	0.0615	5.43	16:29036613-16:31382470
16p11.2	STX4	protein	Brain_Nucleus_accumbens_basal_ganglia	0.183587	4	0.0684509	7.67716e-09	0.211	5.42	16:29036613-16:31382470
16p11.2	STX4	protein	Brain_Putamen_basal_ganglia	0.0522179	8	0.0525951	5.04354e-09	0.195	5.46	16:29036613-16:31382470
16p11.2	STX4	protein	Brain_Substantia_nigra	0.0484155	4	0.130729	3.1173e-09	0.033	5.58	16:29036613-16:31382470
16p11.2	STX4	protein	Colon_Transverse	0.114132	11	-0.085346	1.22151e-06	0.000587	-3.75	16:29036613-16:31382470
16p11.2	STX4	protein	Liver	0.0457757	5	-0.176434	1.3569e-08	0.0115	-5.39	16:29036613-16:31382470
16p11.2	STX4	protein	Pancreas	0.0227463	5	-0.205626	1.3569e-08	0.154	-5.39	16:29036613-16:31382470
16p11.2	STX4	protein	Small_Intestine_Terminal_Ileum	0.07389	5	-0.229123	1.3569e-08	0.0675	-5.39	16:29036613-16:31382470
16p11.2	STX4	protein	Spleen	0.16159	3	-0.158482	1.3569e-08	0.349	-5.39	16:29036613-16:31382470
16p11.2	STX4	protein	Whole_Blood	0.0119512	7	-0.351634	1.3569e-08	0.0835	-5.39	16:29036613-16:31382470
16p11.2	ZNF646	protein	Brain_Caudate_basal_ganglia	0.0608109	4	-0.362945	1.3569e-08	0.0387	-5.39	16:29036613-16:31382470
16p11.2	ZNF646	protein	Brain_Cerebellar_Hemisphere	0.0529616	3	-0.365403	1.3569e-08	0.00436	-5.39	16:29036613-16:31382470
16p11.2	ZNF646	protein	Brain_Cerebellum	0.0438317	3	-0.351794	1.3569e-08	0.0669	-5.39	16:29036613-16:31382470
16p11.2	ZNF646	protein	Brain_Hippocampus	0.093508	4	-0.362809	1.3569e-08	0.0736	-5.39	16:29036613-16:31382470
16p11.2	ZNF646	protein	Brain_Spinal_cord_cervical_c-1	0.0410608	3	-0.368973	1.3569e-08	0.157	-5.39	16:29036613-16:31382470
16p11.2	ZNF646	protein	Colon_Sigmoid	0.0170643	9	-0.292304	1.26913e-08	0.131	-5.42	16:29036613-16:31382470
16p11.2	ZNF646	protein	Colon_Transverse	0.0659718	9	-0.27495	3.9788e-08	0.0942	-5.2	16:29036613-16:31382470
16p11.2	ZNF646	protein	Liver	0.186703	13	-0.024316	3.83997e-08	0.0026	-5.08	16:29036613-16:31382470
16p11.2	ZNF646	protein	Pancreas	0.0149886	3	-0.0861501	6.99091e-07	0.00723	-4.72	16:29036613-16:31382470
16p11.2	ZNF646	protein	Small_Intestine_Terminal_Ileum	0.0979194	13	-0.0566836	2.47483e-06	0.00287	-4.66	16:29036613-16:31382470
16p11.2	ZNF646	protein	Spleen	0.110357	9	-0.113197	2.87399e-06	0.00099	-3.61	16:29036613-16:31382470
16p11.2	ZNF668	protein	Brain_Cerebellar_Hemisphere	0.0284237	5	0.531628	1.10093e-07	0.00104	5.04	16:29036613-16:31382470
16p11.2	ZNF668	protein	Brain_Cortex	0.0326148	2	1.2137	1.88895e-07	0.00415	4.95	16:29036613-16:31382470
16p11.2	ZNF668	protein	Brain_Frontal_Cortex_BA9	0.0332145	3	0.917832	1.88895e-07	0.00418	4.95	16:29036613-16:31382470
16p11.2	ZNF668	protein	Colon_Sigmoid	0.0183248	3	0.492148	1.88895e-07	0.0136	4.95	16:29036613-16:31382470
16p11.2	ZNF668	protein	Small_Intestine_Terminal_Ileum	0.055838	13	0.0715497	3.32937e-07	0.0242	4.75	16:29036613-16:31382470
16p11.2	ZNF668	protein	Stomach	0.0275786	3	0.512221	1.88895e-07	0.00475	4.95	16:29036613-16:31382470
16p11.2	ZNF668	protein	Whole_Blood	0.115178	5	0.379065	7.57497e-09	0.121	5.46	16:29036613-16:31382470
17p12	ADORA2B	protein	Brain_Anterior_cingulate_cortex_BA24	0.110703	9	0.036389	1.45938e-07	0.079	4.75	17:15020965-17:16411522
17p12	ADORA2B	protein	Brain_Caudate_basal_ganglia	0.086332	10	0.0813932	1.07476e-08	0.00101	3.08	17:15020965-17:16411522
17p12	ADORA2B	protein	Brain_Cerebellar_Hemisphere	0.271992	4	0.0344645	9.53362e-08	0.304	5.03	17:15020965-17:16411522
17p12	ADORA2B	protein	Brain_Cerebellum	0.104148	6	0.0333858	1.15494e-07	0.861	5	17:15020965-17:16411522
17p12	ADORA2B	protein	Brain_Cortex	0.133002	5	0.0341629	1.06577e-07	0.12	5.02	17:15020965-17:16411522
17p12	ADORA2B	protein	Brain_Frontal_Cortex_BA9	0.138936	3	0.0553436	9.89358e-08	0.787	5.02	17:15020965-17:16411522
17p12	ADORA2B	protein	Brain_Hippocampus	0.0729083	13	0.0342688	5.3671e-07	0.00167	3.99	17:15020965-17:16411522
17p12	ADORA2B	protein	Brain_Hypothalamus	0.131595	13	0.0284146	4.7764e-07	0.00346	3.71	17:15020965-17:16411522
17p12	ADORA2B	protein	Brain_Nucleus_accumbens_basal_ganglia	0.116062	4	0.0354361	9.82404e-08	0.12	5.04	17:15020965-17:16411522
17p12	ADORA2B	protein	Brain_Putamen_basal_ganglia	0.0520054	5	0.0340544	1.10914e-07	0.0934	5.01	17:15020965-17:16411522
17p12	ADORA2B	protein	Brain_Spinal_cord_cervical_c-1	0.229373	6	0.0394571	6.39144e-08	0.467	5.04	17:15020965-17:16411522
17p12	ADORA2B	protein	Brain_Substantia_nigra	0.129597	7	0.0404234	8.41585e-08	0.969	5.04	17:15020965-17:16411522
17p12	ADORA2B	protein	Colon_Sigmoid	0.189583	5	0.0306492	1.32659e-07	0.884	5.02	17:15020965-17:16411522
17p12	ADORA2B	protein	Colon_Transverse	0.068176	7	0.0317052	1.31249e-07	0.964	5	17:15020965-17:16411522
17p12	ADORA2B	protein	Liver	0.27011	7	0.0315254	1.44974e-07	0.51	4.99	17:15020965-17:16411522
17p12	ADORA2B	protein	Pancreas	0.273369	5	0.0317174	1.94977e-07	0.805	4.93	17:15020965-17:16411522
17p12	ADORA2B	protein	Pituitary	0.235535	10	0.0310801	2.37561e-07	0.0201	4.13	17:15020965-17:16411522
17p12	ADORA2B	protein	Small_Intestine_Terminal_Ileum	0.113799	2	0.0382566	1.25805e-07	0.684	5.02	17:15020965-17:16411522
17p12	ADORA2B	protein	Spleen	0.40469	7	0.0303179	1.37767e-07	0.362	5	17:15020965-17:16411522
17p12	ADORA2B	protein	Stomach	0.395821	9	0.02997	1.7642e-07	0.362	4.87	17:15020965-17:16411522
17p12	TTC19	protein	Brain_Amygdala	0.144122	3	-0.0475378	1.24337e-07	0.33	-5.08	17:15020965-17:16411522
17p12	TTC19	protein	Brain_Anterior_cingulate_cortex_BA24	0.0345221	5	-0.0285927	9.4007e-08	0.493	-5.14	17:15020965-17:16411522
17p12	TTC19	protein	Brain_Caudate_basal_ganglia	0.229597	10	-0.0284786	1.46029e-06	0.00055	-2.9	17:15020965-17:16411522
17p12	TTC19	protein	Brain_Cerebellar_Hemisphere	0.0460537	3	-0.0533322	5.23401e-08	0.274	-5.01	17:15020965-17:16411522
17p12	TTC19	protein	Brain_Cortex	0.114123	5	-0.0472566	4.52719e-08	0.0691	-4.9	17:15020965-17:16411522
17p12	TTC19	protein	Brain_Hippocampus	0.111122	5	-0.0458177	7.75616e-09	0.157	-5.1	17:15020965-17:16411522
17p12	TTC19	protein	Brain_Hypothalamus	0.0594816	6	-0.0471655	4.70259e-08	0.195	-4.83	17:15020965-17:16411522
17p12	TTC19	protein	Brain_Nucleus_accumbens_basal_ganglia	0.135492	11	-0.0271433	2.96918e-06	0.000277	-2.46	17:15020965-17:16411522
17p12	TTC19	protein	Brain_Putamen_basal_ganglia	0.214993	11	-0.0408426	3.08885e-08	0.207	-5.18	17:15020965-17:16411522
17p12	TTC19	protein	Brain_Spinal_cord_cervical_c-1	0.147137	3	-0.0465765	1.32617e-07	0.521	-5.06	17:15020965-17:16411522
17p12	TTC19	protein	Liver	0.172622	8	-0.0226466	3.75719e-07	0.00232	-3.65	17:15020965-17:16411522
17p12	TTC19	protein	Pancreas	0.25965	16	-0.0226745	2.22267e-06	0.00052	-2.46	17:15020965-17:16411522
17p12	TTC19	protein	Pituitary	0.152502	8	-0.0279456	2.25756e-07	0.0439	-4.33	17:15020965-17:16411522
17p12	TTC19	protein	Small_Intestine_Terminal_Ileum	0.279702	19	-0.0178223	4.10014e-06	0.000481	-2.52	17:15020965-17:16411522
17p12	TTC19	protein	Stomach	0.207341	2	-0.0552779	1.61824e-07	0.614	-4.98	17:15020965-17:16411522
17p12	TTC19	protein	Whole_Blood	0.171984	2	-0.045253	1.61824e-07	0.122	-4.98	17:15020965-17:16411522
17p12-p11.2	NCOR1	protein	Brain_Amygdala	0.0546965	9	0.0685481	1.64988e-08	0.651	5.22	17:15020965-17:16411522
17p12-p11.2	NCOR1	protein	Brain_Caudate_basal_ganglia	0.0322784	8	0.0545513	4.03759e-08	0.204	4.74	17:15020965-17:16411522
17p12-p11.2	NCOR1	protein	Brain_Hippocampus	0.0564679	8	0.0628443	2.09358e-08	0.15	5.1	17:15020965-17:16411522
17p12-p11.2	NCOR1	protein	Brain_Hypothalamus	0.0307266	9	0.111657	3.67198e-08	0.179	4.81	17:15020965-17:16411522
17p12-p11.2	NCOR1	protein	Brain_Nucleus_accumbens_basal_ganglia	0.0494163	4	0.57943	2.10624e-07	0.073	4.93	17:15020965-17:16411522
17p12-p11.2	NCOR1	protein	Brain_Putamen_basal_ganglia	0.0230742	8	0.111533	4.18147e-08	0.024	4.72	17:15020965-17:16411522
17p12-p11.2	NCOR1	protein	Liver	0.0321754	6	0.148694	1.40822e-07	0.469	4.97	17:15020965-17:16411522
17p12-p11.2	NCOR1	protein	Spleen	0.039203	8	0.128101	5.04065e-07	0.0783	4.67	17:15020965-17:16411522
17q21.31	ARHGAP27	protein	Brain_Caudate_basal_ganglia	0.122012	11	-0.0724383	1.74837e-20	0.985	-9.53	17:43056905-17:45876022
17q21.31	ARHGAP27	protein	Brain_Cerebellar_Hemisphere	0.222039	14	-0.0266933	5.23665e-14	0.000164	-7.14	17:43056905-17:45876022
17q21.31	ARHGAP27	protein	Brain_Cerebellum	0.3492	14	-0.0247568	2.83034e-14	0.000144	-6.26	17:43056905-17:45876022
17q21.31	ARHGAP27	protein	Brain_Cortex	0.130846	10	-0.0639989	2.53399e-16	0.000275	-8.19	17:43056905-17:45876022
17q21.31	ARHGAP27	protein	Brain_Frontal_Cortex_BA9	0.0713216	7	-0.0290286	8.44815e-08	0.000195	-7.26	17:43056905-17:45876022
17q21.31	ARHGAP27	protein	Brain_Nucleus_accumbens_basal_ganglia	0.256865	15	-0.0583078	2.39938e-22	0.31	-9.29	17:43056905-17:45876022
17q21.31	ARHGAP27	protein	Brain_Putamen_basal_ganglia	0.078228	11	-0.0614305	5.99386e-16	0.00055	-7.91	17:43056905-17:45876022
17q21.31	ARL17B	protein	Brain_Amygdala	0.35615	18	-4.13771	3.22764e-20	0.056	-9.07	17:43056905-17:45876022
17q21.31	ARL17B	protein	Brain_Anterior_cingulate_cortex_BA24	0.415774	18	-0.225895	3.22764e-20	0.293	-9.2	17:43056905-17:45876022
17q21.31	ARL17B	protein	Brain_Cerebellar_Hemisphere	0.45372	15	-0.115456	3.22764e-20	0.00421	-9.17	17:43056905-17:45876022
17q21.31	ARL17B	protein	Brain_Cortex	0.52117	18	-0.18523	3.22764e-20	0.00978	-9.07	17:43056905-17:45876022
17q21.31	ARL17B	protein	Brain_Frontal_Cortex_BA9	0.472909	18	-0.191564	3.22764e-20	0.162	-9.07	17:43056905-17:45876022
17q21.31	ARL17B	protein	Brain_Hippocampus	0.374072	16	-0.220204	3.22764e-20	0.0321	-9.07	17:43056905-17:45876022
17q21.31	ARL17B	protein	Brain_Hypothalamus	0.441241	17	-0.176556	3.22764e-20	0.0425	-9.07	17:43056905-17:45876022
17q21.31	ARL17B	protein	Brain_Nucleus_accumbens_basal_ganglia	0.515113	17	-0.181467	3.22764e-20	0.0985	-9.17	17:43056905-17:45876022
17q21.31	ARL17B	protein	Brain_Spinal_cord_cervical_c-1	0.390471	18	-0.118829	3.22764e-20	0.00909	-9.17	17:43056905-17:45876022
17q21.31	ARL17B	protein	Brain_Substantia_nigra	0.344942	15	-0.119126	3.22764e-20	0.0138	-9.17	17:43056905-17:45876022
17q21.31	ARL17B	protein	Colon_Sigmoid	0.54026	30	0.0284271	2.66654e-06	0.000837	4.47	17:43056905-17:45876022
17q21.31	ARL17B	protein	Colon_Transverse	0.447644	25	0.029988	3.96767e-06	0.00326	4.57	17:43056905-17:45876022
17q21.31	ARL17B	protein	Pancreas	0.378839	21	-0.218425	3.22764e-20	0.289	-9.2	17:43056905-17:45876022
17q21.31	ARL17B	protein	Pituitary	0.479395	12	-0.330684	3.22764e-20	0.219	-9.17	17:43056905-17:45876022
17q21.31	ARL17B	protein	Small_Intestine_Terminal_Ileum	0.337977	16	-0.116941	3.22764e-20	0.162	-9.2	17:43056905-17:45876022
17q21.31	ARL17B	protein	Spleen	0.444921	19	-0.135233	3.22764e-20	0.00604	-9.21	17:43056905-17:45876022
17q21.31	CRHR1	protein	Brain_Cortex	0.0192329	5	-0.119503	3.26873e-11	0.000729	-8.72	17:43056905-17:45876022
17q21.31	CRHR1	protein	Brain_Hippocampus	0.0564919	13	0.0788422	3.38861e-12	0.095	9.19	17:43056905-17:45876022
17q21.31	CRHR1	protein	Brain_Nucleus_accumbens_basal_ganglia	0.127012	17	0.0351593	3.51274e-09	0.000244	7.28	17:43056905-17:45876022
17q21.31	CRHR1	protein	Brain_Putamen_basal_ganglia	0.0751953	17	0.0566991	1.83956e-12	0.00452	8.86	17:43056905-17:45876022
17q21.31	CRHR1	protein	Brain_Spinal_cord_cervical_c-1	0.0852991	4	0.205283	1.15123e-16	0.00301	8.99	17:43056905-17:45876022
17q21.31	CRHR1	protein	Colon_Sigmoid	0.0353507	9	-0.16579	1.07813e-22	0.586	-9.71	17:43056905-17:45876022
17q21.31	KANSL1	protein	Brain_Amygdala	0.284866	15	-0.0818433	4.55892e-12	0.00124	-8.59	17:43056905-17:45876022
17q21.31	KANSL1	protein	Brain_Caudate_basal_ganglia	0.274658	28	-0.0642565	1.15006e-12	0.000423	-5.48	17:43056905-17:45876022
17q21.31	KANSL1	protein	Brain_Cerebellar_Hemisphere	0.441645	26	-0.0321765	1.41453e-08	0.000548	0.154	17:43056905-17:45876022
17q21.31	KANSL1	protein	Brain_Cerebellum	0.423511	47	-0.0291793	4.18691e-08	0.000443	-0.541	17:43056905-17:45876022
17q21.31	KANSL1	protein	Brain_Cortex	0.414173	29	-0.0631794	1.97166e-12	0.000688	-5.53	17:43056905-17:45876022
17q21.31	KANSL1	protein	Brain_Frontal_Cortex_BA9	0.217186	20	-0.0766638	7.58006e-14	0.000351	-5.94	17:43056905-17:45876022
17q21.31	KANSL1	protein	Brain_Hippocampus	0.253564	25	-0.0321499	2.47015e-08	0.00037	-4.62	17:43056905-17:45876022
17q21.31	KANSL1	protein	Brain_Hypothalamus	0.231336	20	-0.0740522	6.14763e-13	0.000368	-8.25	17:43056905-17:45876022
17q21.31	KANSL1	protein	Brain_Nucleus_accumbens_basal_ganglia	0.214408	21	-0.0723142	7.08873e-13	0.000235	-5.55	17:43056905-17:45876022
17q21.31	KANSL1	protein	Brain_Putamen_basal_ganglia	0.29199	20	-0.0774577	6.47703e-14	0.000277	-5.98	17:43056905-17:45876022
17q21.31	KANSL1	protein	Brain_Spinal_cord_cervical_c-1	0.153344	16	-0.0648697	5.73997e-06	0.000484	-4.19	17:43056905-17:45876022
17q21.31	KANSL1	protein	Brain_Substantia_nigra	0.230186	18	-0.077707	2.63357e-13	0.000223	-8.27	17:43056905-17:45876022
17q21.31	KANSL1	protein	Colon_Sigmoid	0.429253	36	-0.057814	2.199e-16	0.00021	-7.47	17:43056905-17:45876022
17q21.31	KANSL1	protein	Colon_Transverse	0.335796	27	-0.0872785	9.68567e-18	0.000284	-5.78	17:43056905-17:45876022
17q21.31	KANSL1	protein	Pancreas	0.119262	9	0.161286	1.54122e-11	0.00239	7.1	17:43056905-17:45876022
17q21.31	KANSL1	protein	Pituitary	0.421234	25	-0.0717759	1.44381e-12	0.00145	-8.13	17:43056905-17:45876022
17q21.31	KANSL1	protein	Small_Intestine_Terminal_Ileum	0.251527	23	-0.086945	8.20121e-09	0.000164	-4.21	17:43056905-17:45876022
17q21.31	KANSL1	protein	Spleen	0.366775	19	-0.0814517	2.43271e-10	0.00154	-4.42	17:43056905-17:45876022
17q21.31	KANSL1	protein	Whole_Blood	0.366219	37	-0.0550576	4.9609e-15	0.000191	0.901	17:43056905-17:45876022
17q21.31	NMT1	protein	Brain_Cerebellar_Hemisphere	0.132824	23	0.0297091	9.30574e-09	0.197	9.6	17:43056905-17:45876022
17q21.31	NSF	protein	Brain_Caudate_basal_ganglia	0.0332846	6	-0.279805	4.08222e-06	0.00107	-4.47	17:43056905-17:45876022
17q21.31	NSF	protein	Brain_Cerebellar_Hemisphere	0.221082	11	0.0924264	3.80697e-06	0.000123	4.73	17:43056905-17:45876022
17q21.31	NSF	protein	Brain_Cerebellum	0.205458	2	0.36914	2.14578e-12	0.00028	6.92	17:43056905-17:45876022
17q21.31	NSF	protein	Liver	0.0432997	5	-0.05199	2.047e-06	0.00255	-4.82	17:43056905-17:45876022
17q21.31	NSF	protein	Spleen	0.0210102	7	0.101228	4.85924e-07	0.000676	-2.97	17:43056905-17:45876022
17q21.31	NSF	protein	Stomach	0.0433652	9	0.0843507	1.15757e-06	0.000786	-3.96	17:43056905-17:45876022
17q21.31-q21.32	WNT3	protein	Colon_Sigmoid	0.184779	10	-0.056315	2.19229e-15	0.00233	-8.8	17:43056905-17:45876022
17q21.31-q21.32	WNT3	protein	Colon_Transverse	0.177168	13	-0.0621485	1.47704e-21	0.985	-8.8	17:43056905-17:45876022
17q21.31-q21.32	WNT3	protein	Pancreas	0.258657	10	-0.0550847	7.74266e-18	0.0622	-9.01	17:43056905-17:45876022
17q21.31-q21.32	WNT3	protein	Pituitary	0.274369	15	-0.024719	8.92158e-18	0.579	-9.27	17:43056905-17:45876022
17q21.31-q21.32	WNT3	protein	Small_Intestine_Terminal_Ileum	0.0999378	7	-0.0571931	1.75378e-15	0.501	-9.33	17:43056905-17:45876022
17q21.31-q21.32	WNT3	protein	Spleen	0.112054	6	-0.0645943	2.72794e-17	0.0291	-9.35	17:43056905-17:45876022
17q21.31-q21.32	WNT3	protein	Stomach	0.14381	8	-0.065255	1.01681e-17	0.542	-9.37	17:43056905-17:45876022
17q21.31-q21.32	WNT3	protein	Whole_Blood	0.0196714	11	-0.0537643	2.05074e-13	0.592	-9.32	17:43056905-17:45876022
18q12.3	RIT2	protein	Brain_Substantia_nigra	0.0348901	5	0.127225	3.04575e-06	0.825	4.6	18:39892648-18:42921854
20p13	DDRGK1	protein	Brain_Spinal_cord_cervical_c-1	0.0351246	5	0.234237	3.02181e-07
20p13	DDRGK1	protein	Pituitary	0.0280834	7	0.111533	5.13965e-07
20p13	LZTS3	protein	Colon_Sigmoid	0.0584971	11	-0.0479612	8.38517e-08
20p13	LZTS3	protein	Colon_Transverse	0.0636262	17	-0.0439763	7.89911e-08
20p13	LZTS3	protein	Stomach	0.0328281	15	-0.0483973	6.74542e-08
21q22.13	DYRK1A	protein	Pituitary	0.0172729	2	0.495862	4.73013e-06
3q27.1	MCCC1-AS1	lncRNA	Brain_Cortex	0.0511726	5	-0.0677479	6.12988e-07	0.915	-4.12	3:181511166-3:183769683
3q27.1	MCCC1-AS1	lncRNA	Brain_Frontal_Cortex_BA9	0.0536782	7	-0.0641079	9.76854e-07	0.805	-3.88	3:181511166-3:183769683
3q27.1	MCCC1-AS1	lncRNA	Brain_Nucleus_accumbens_basal_ganglia	0.0622053	7	-0.06369	1.00133e-06	0.72	-3.87	3:181511166-3:183769683
3q27.1	MCCC1-AS1	lncRNA	Brain_Putamen_basal_ganglia	0.0465369	6	-0.0648869	8.55876e-07	0.0592	-3.95	3:181511166-3:183769683
3q27.1	MCCC1-AS1	lncRNA	Brain_Spinal_cord_cervical_c-1	0.0319093	6	-0.0682833	5.72145e-07	0.425	-4.16	3:181511166-3:183769683
3q27.1	MCCC1-AS1	lncRNA	Pituitary	0.0732946	8	-0.0573447	1.09704e-06	0.479	-3.6	3:181511166-3:183769683
4p16.3	AC139887.3	lnRNA	Brain_Cerebellar_Hemisphere	0.0318238	6	0.114443	6.32285e-07	0.00104	4.74	4:695146-4:1478711
5q12.1	AC104113.1	lnRNA	Spleen	0.0447602	1	0.0465571	3.97467e-07	0.38	4.83	5:58524622-5:60935451
7p15.3	KLHL7-DT	lncRNA	Brain_Amygdala	0.494811	13	-0.0127615	6.338e-07	0.114	-4.42	7:22508611-7:23469560
7p15.3	KLHL7-DT	lncRNA	Colon_Transverse	0.522038	13	-0.010516	3.24744e-07	0.868	-4.72	7:22508611-7:23469560
7p15.3	KLHL7-DT	lncRNA	Liver	0.444643	8	-0.010625	3.42834e-07	0.0497	-4.73	7:22508611-7:23469560
7p15.3	KLHL7-DT	lncRNA	Pancreas	0.577989	16	-0.0105344	3.33405e-07	0.112	-4.72	7:22508611-7:23469560
7p15.3	KLHL7-DT	lncRNA	Small_Intestine_Terminal_Ileum	0.526736	18	-0.0108075	2.78744e-07	0.0324	-4.41	7:22508611-7:23469560
7p15.3	KLHL7-DT	lncRNA	Spleen	0.628548	11	-0.0099789	3.71757e-07	0.376	-4.69	7:22508611-7:23469560
7p15.3	KLHL7-DT	lncRNA	Stomach	0.482859	12	-0.0105781	3.75568e-07	0.18	-4.61	7:22508611-7:23469560
7p15.3	AC005082.1	lnRNA	Brain_Nucleus_accumbens_basal_ganglia	0.20201	6	-0.0414592	3.97356e-07	0.219	-4.44	7:22508611-7:23469560
7p15.3	AC005082.1	lnRNA	Colon_Sigmoid	0.230347	11	-0.0461567	4.06567e-07	0.0358	-3.87	7:22508611-7:23469560
7p15.3	AC005082.1	lnRNA	Colon_Transverse	0.172494	8	-0.0309536	2.42617e-06	0.0324	-3.65	7:22508611-7:23469560
7p15.3	AC005082.1	lnRNA	Pancreas	0.0870935	7	-0.0498915	4.55217e-08	0.0212	-4.16	7:22508611-7:23469560
7p15.3	AC005082.1	lnRNA	Small_Intestine_Terminal_Ileum	0.215122	8	-0.0581583	4.89681e-06	0.00722	-3.55	7:22508611-7:23469560
16p11.2	AC106886.3	lnRNA	Brain_Anterior_cingulate_cortex_BA24	0.0308852	6	-0.265196	8.98662e-09	0.00706	-4.81	16:29036613-16:31382470
16p11.2	AC106886.3	lnRNA	Brain_Cortex	0.0291125	2	-0.10553	1.09304e-09	0.217	-5.78	16:29036613-16:31382470
16p11.2	AC135048.3	lnRNA	Brain_Caudate_basal_ganglia	0.0445218	8	0.138011	5.44232e-10	0.645	5.91	16:29036613-16:31382470
16p11.2	AC135048.3	lnRNA	Brain_Cerebellar_Hemisphere	0.0667911	3	0.0497648	2.59078e-11	0.873	6.35	16:29036613-16:31382470
16p11.2	AC135048.3	lnRNA	Brain_Hypothalamus	0.0643817	5	0.0979504	9.93576e-10	0.502	5.82	16:29036613-16:31382470
16p11.2	AC135048.3	lnRNA	Brain_Spinal_cord_cervical_c-1	0.0347027	1	0.554643	2.03538e-09	0.803	5.7	16:29036613-16:31382470
16p11.2	AC135050.1	lnRNA	Brain_Amygdala	0.0473404	2	7.90236	2.10405e-10	0.892	6.04	16:29036613-16:31382470
16p11.2	AC135050.1	lnRNA	Brain_Anterior_cingulate_cortex_BA24	0.06181	5	0.214799	6.71812e-07	0.0014	4.44	16:29036613-16:31382470
16p11.2	AC135050.1	lnRNA	Brain_Cortex	0.0256411	6	0.308347	5.30331e-09	0.0116	5.22	16:29036613-16:31382470
16p11.2	AC135050.1	lnRNA	Brain_Frontal_Cortex_BA9	0.0412009	2	5.59116	1.88895e-07	0.00418	4.95	16:29036613-16:31382470
16p11.2	AC135050.1	lnRNA	Brain_Hypothalamus	0.0274092	8	0.044656	2.26231e-07	0.00134	4.51	16:29036613-16:31382470
16p11.2	AC135050.1	lnRNA	Pituitary	0.0710805	6	0.796081	5.11127e-07	0.011	4.54	16:29036613-16:31382470
16p11.2	AC135050.3	lnRNA	Brain_Amygdala	0.0858583	7	-0.0494009	1.15406e-07	0.00534	-5.04	16:29036613-16:31382470
16p11.2	AC135050.3	lnRNA	Brain_Anterior_cingulate_cortex_BA24	0.146948	7	-0.0967292	3.03704e-08	0.0583	-5.33	16:29036613-16:31382470
16p11.2	AC135050.3	lnRNA	Brain_Cerebellar_Hemisphere	0.238779	10	-0.0921422	4.03588e-08	0.00254	-5.27	16:29036613-16:31382470
16p11.2	AC135050.3	lnRNA	Brain_Cerebellum	0.399408	10	-0.0898047	4.84029e-08	0.0311	-5.24	16:29036613-16:31382470
16p11.2	AC135050.3	lnRNA	Brain_Cortex	0.151478	12	-0.0766864	1.72128e-07	0.00442	-4.94	16:29036613-16:31382470
16p11.2	AC135050.3	lnRNA	Brain_Frontal_Cortex_BA9	0.0995773	8	-0.030647	2.37634e-08	0.0251	-5.35	16:29036613-16:31382470
16p11.2	AC135050.3	lnRNA	Brain_Hippocampus	0.184352	4	-0.0421233	1.06848e-07	0.0141	-5.05	16:29036613-16:31382470
16p11.2	AC135050.3	lnRNA	Brain_Hypothalamus	0.0827452	9	-0.0979911	2.9356e-08	0.0395	-5.34	16:29036613-16:31382470
16p11.2	AC135050.3	lnRNA	Brain_Nucleus_accumbens_basal_ganglia	0.0668861	8	-0.0954207	2.86062e-08	0.141	-5.35	16:29036613-16:31382470
16p11.2	AC135050.3	lnRNA	Brain_Putamen_basal_ganglia	0.121748	8	-0.0465541	7.66471e-08	0.0149	-4.88	16:29036613-16:31382470
16p11.2	AC135050.3	lnRNA	Brain_Spinal_cord_cervical_c-1	0.313349	9	-0.0939997	9.78941e-08	0.0312	-5.08	16:29036613-16:31382470
16p11.2	AC135050.3	lnRNA	Brain_Substantia_nigra	0.190289	6	-0.0514724	1.06848e-07	0.00274	-5.05	16:29036613-16:31382470
16p11.2	AC135050.3	lnRNA	Pituitary	0.220427	10	-0.0394739	3.64967e-07	0.035	-4.8	16:29036613-16:31382470
16p11.2	AC135050.3	lnRNA	Whole_Blood	0.187263	14	-0.0500131	1.69624e-06	0.000812	-4.2	16:29036613-16:31382470
16p11.2	AC135050.6	lnRNA	Brain_Cortex	0.0465994	3	0.189358	1.18899e-06	0.00111	4.61	16:29036613-16:31382470
16p11.2	AC135050.6	lnRNA	Brain_Hippocampus	0.0369487	3	0.178829	1.18899e-06	0.0023	4.61	16:29036613-16:31382470
16p11.2	AC135050.6	lnRNA	Brain_Nucleus_accumbens_basal_ganglia	0.0585894	3	0.0619124	9.97052e-07	0.00253	4.42	16:29036613-16:31382470
16p11.2	AC135050.6	lnRNA	Brain_Spinal_cord_cervical_c-1	0.0474034	3	0.211829	1.18899e-06	0.00447	4.61	16:29036613-16:31382470
16p11.2	AC012645.4	lnRNA	Small_Intestine_Terminal_Ileum	0.313645	33	-0.0368238	1.76605e-06	0.0104	-4.89	16:29036613-16:31382470
16p11.2	AC135048.3	lnRNA	Colon_Sigmoid	0.186037	7	-0.116781	2.4746e-09
16p11.2	AC135048.3	lnRNA	Colon_Transverse	0.21264	13	-0.0658921	4.15365e-08
16p11.2	AC135048.3	lnRNA	Liver	0.0294591	7	0.164351	2.03538e-09	0.0569	5.7	16:29036613-16:31382470
16p11.2	AC135048.3	lnRNA	Small_Intestine_Terminal_Ileum	0.264628	12	-0.0873541	1.95674e-07
16p11.2	AC135048.3	lnRNA	Spleen	0.26701	30	-0.0152447	8.3203e-08
16p11.2	AC135048.3	lnRNA	Stomach	0.060808	5	0.246545	5.75152e-10	0.501	5.9	16:29036613-16:31382470
16p11.2	AC135050.3	lnRNA	Stomach	0.181805	16	-0.0333235	1.09947e-08	0.00981	-5.15	16:29036613-16:31382470
17p12	AC002553.1	lnRNA	Brain_Cerebellar_Hemisphere	0.0815405	5	0.0811389	3.04497e-07	0.415	5.1	17:15020965-17:16411522
17p12	AC002553.1	lnRNA	Brain_Cerebellum	0.0581328	2	0.032947	3.60445e-07	0.109	4.55	17:15020965-17:16411522
17p12	AC002553.1	lnRNA	Brain_Nucleus_accumbens_basal_ganglia	0.0202091	1	0.137497	1.4514e-08	0.695	5.38	17:15020965-17:16411522
17p12	AC002553.1	lnRNA	Brain_Putamen_basal_ganglia	0.0358281	2	0.0906526	1.83491e-08	0.598	5.38	17:15020965-17:16411522
17p12	AC002553.1	lnRNA	Colon_Sigmoid	0.0140932	6	0.1922	8.15437e-07	0.0847	4.52	17:15020965-17:16411522
17p12	AC002553.1	lnRNA	Spleen	0.0250443	7	0.134509	3.78889e-06	0.00215	3.76	17:15020965-17:16411522
17p12	AC002553.2	lnRNA	Brain_Anterior_cingulate_cortex_BA24	0.0371628	4	-0.79257	1.3319e-07	0.268	-5.01	17:15020965-17:16411522
17p12	AC002553.2	lnRNA	Brain_Caudate_basal_ganglia	0.0224041	5	-0.286956	3.57657e-08	0.000288	-0.253	17:15020965-17:16411522
17p12	AC002553.2	lnRNA	Brain_Cortex	0.0304246	6	-0.357359	3.41983e-08	0.000604	-0.389	17:15020965-17:16411522
17p12	AC002553.2	lnRNA	Brain_Spinal_cord_cervical_c-1	0.0991286	7	-0.0242728	8.37559e-07	0.000301	-2.29	17:15020965-17:16411522
17p12	AC002553.2	lnRNA	Brain_Substantia_nigra	0.101808	9	-0.0546288	2.98503e-06	0.000272	-0.948	17:15020965-17:16411522
17q21.31	AC008105.3	lnRNA	Brain_Cerebellar_Hemisphere	0.0979421	10	0.160395	1.16754e-11	0.000227	8.32	17:43056905-17:45876022
17q21.31	AC008105.3	lnRNA	Brain_Cerebellum	0.1259	9	0.283689	3.80965e-06	0.000145	6.48	17:43056905-17:45876022
17q21.31	AC091132.1	lnRNA	Pituitary	0.225391	6	0.254396	2.23492e-12	0.000212	6.79	17:43056905-17:45876022
17q21.31	AC091132.1	lnRNA	Small_Intestine_Terminal_Ileum	0.134476	7	0.148831	1.03739e-11	0.00018	6.6	17:43056905-17:45876022
17q21.31	AC091132.2	lnRNA	Brain_Cerebellar_Hemisphere	0.120529	3	0.162369	6.53183e-22	0.0444	9.44	17:43056905-17:45876022
17q21.31	AC091132.4	lnRNA	Brain_Hypothalamus	0.0490625	7	0.208877	1.06627e-06	0.000224	4.77	17:43056905-17:45876022
17q21.31	CR936218.1	lnRNA	Brain_Cerebellum	0.0187803	9	0.0620299	1.06013e-07	0.000319	6.74	17:43056905-17:45876022
17q21.31	CR936218.1	lnRNA	Brain_Nucleus_accumbens_basal_ganglia	0.0254365	5	1.40051	2.11666e-20	0.0676	9.11	17:43056905-17:45876022
17q21.31	CR936218.1	lnRNA	Pancreas	0.0150468	9	0.372209	6.82595e-21	0.0125	8.77	17:43056905-17:45876022
17q21.31	CR936218.1	lnRNA	Small_Intestine_Terminal_Ileum	0.0234492	7	0.141235	3.87771e-15	0.000536	6.28	17:43056905-17:45876022
17q21.31	CR936218.1	lnRNA	Spleen	0.017056	3	0.929528	2.11666e-20	0.00692	9.11	17:43056905-17:45876022
17q21.31	CR936218.1	lnRNA	Stomach	0.0393978	6	0.363074	2.14399e-21	0.458	9.34	17:43056905-17:45876022
17q21.31	FAM215B	lnRNA	Brain_Cerebellar_Hemisphere	0.358604	9	-0.0778947	7.75832e-10	0.000571	-3.89	17:43056905-17:45876022
17q21.31	FAM215B	lnRNA	Small_Intestine_Terminal_Ileum	0.0325956	7	-0.0825592	1.61807e-13	0.000188	-5.44	17:43056905-17:45876022
17q21.31	MAPT-AS1	lnRNA	Brain_Amygdala	0.110245	11	0.0605847	4.51242e-08	0.944	9.38	17:43056905-17:45876022
17q21.31	MAPT-AS1	lnRNA	Brain_Caudate_basal_ganglia	0.221916	23	0.0235175	4.39502e-12	0.000301	7.94	17:43056905-17:45876022
17q21.31	MAPT-AS1	lnRNA	Brain_Cerebellar_Hemisphere	0.113644	14	0.0470101	4.37518e-15	0.0245	9.38	17:43056905-17:45876022
17q21.31	MAPT-AS1	lnRNA	Brain_Cerebellum	0.0574756	10	0.0576339	2.72854e-17	0.00025	8.32	17:43056905-17:45876022
17q21.31	MAPT-AS1	lnRNA	Brain_Hippocampus	0.136464	8	0.0480319	1.46574e-13	0.167	9.26	17:43056905-17:45876022
17q21.31	MAPT-AS1	lnRNA	Brain_Hypothalamus	0.282767	9	0.0424975	2.26587e-14	0.148	9.21	17:43056905-17:45876022
17q21.31	MAPT-AS1	lnRNA	Brain_Nucleus_accumbens_basal_ganglia	0.351509	13	0.0411396	3.97737e-16	0.00237	8.69	17:43056905-17:45876022
17q21.31	MAPT-AS1	lnRNA	Brain_Putamen_basal_ganglia	0.155025	23	0.033994	3.12025e-08	0.000751	5.6	17:43056905-17:45876022
17q21.31	MAPT-AS1	lnRNA	Brain_Spinal_cord_cervical_c-1	0.257053	10	0.0401869	7.79541e-10	0.000202	7.53	17:43056905-17:45876022
17q21.31	MAPT-AS1	lnRNA	Brain_Substantia_nigra	0.177287	10	0.0416491	1.14888e-12	0.0111	9.14	17:43056905-17:45876022
17q21.31	MAPT-AS1	lnRNA	Pituitary	0.0168336	12	0.0378907	4.2746e-06	0.0106	8.72	17:43056905-17:45876022
17q21.31	MAPT-IT1	lnRNA	Brain_Caudate_basal_ganglia	0.069163	9	-0.105766	6.10943e-21	0.000168	-7.26	17:43056905-17:45876022
17q21.31	MAPT-IT1	lnRNA	Brain_Cerebellar_Hemisphere	0.0509754	2	-0.173494	9.80056e-22	0.141	-9.57	17:43056905-17:45876022
17q21.31	MAPT-IT1	lnRNA	Brain_Cerebellum	0.135548	6	-0.184325	3.6356e-23	0.416	-9.61	17:43056905-17:45876022
17q21.31	MAPT-IT1	lnRNA	Brain_Hippocampus	0.0435454	9	-0.11603	9.66197e-22	0.511	-9.38	17:43056905-17:45876022
17q21.31	MAPT-IT1	lnRNA	Brain_Hypothalamus	0.0889224	9	-0.108455	3.62695e-21	0.0648	-9.11	17:43056905-17:45876022
17q21.31	MAPT-IT1	lnRNA	Brain_Nucleus_accumbens_basal_ganglia	0.0517345	7	-0.118315	4.82194e-22	0.174	-9.23	17:43056905-17:45876022
17q21.31	MAPT-IT1	lnRNA	Brain_Putamen_basal_ganglia	0.0508587	9	-0.10745	4.47891e-21	0.345	-9.41	17:43056905-17:45876022
17q21.31	MAPT-IT1	lnRNA	Brain_Spinal_cord_cervical_c-1	0.0884978	5	-0.0672766	4.1695e-10	0.000181	-6.11	17:43056905-17:45876022
17q21.31	MAPT-IT1	lnRNA	Brain_Substantia_nigra	0.0860082	4	-0.175615	1.92795e-22	0.963	-9.63	17:43056905-17:45876022
17q21.31	MAPT-IT1	lnRNA	Colon_Sigmoid	0.0166775	7	-0.198125	7.94859e-22	0.411	-9.67	17:43056905-17:45876022
17q21.31	MAPT-IT1	lnRNA	Liver	0.204257	11	0.0318234	4.03339e-20	0.000253	3.91	17:43056905-17:45876022
17q21.31	MAPT-IT1	lnRNA	Pituitary	0.114563	11	-0.080474	3.02385e-18	0.000238	-6.86	17:43056905-17:45876022
17q21.31	MAPT-IT1	lnRNA	Pituitary	0.0280834	7	0.111533	5.13965e-07
17q21.32	CR936218.2	lnRNA	Liver	0.455667	11	0.0246145	2.48257e-22	0.00956	8.69	17:43056905-17:45876022
17q21.31	KANSL1-AS1	lncRNA	Brain_Amygdala	0.552675	16	-0.0343133	1.48517e-20	0.000928	-8.53	17:43056905-17:45876022
17q21.31	KANSL1-AS1	lncRNA	Brain_Anterior_cingulate_cortex_BA24	0.585371	27	-0.0676195	4.51556e-21	0.415	-9.24	17:43056905-17:45876022
17q21.31	KANSL1-AS1	lncRNA	Brain_Caudate_basal_ganglia	0.647089	25	-0.0305414	2.99086e-20	0.000435	-3.76	17:43056905-17:45876022
17q21.31	KANSL1-AS1	lncRNA	Brain_Cerebellar_Hemisphere	0.605615	28	-0.0693099	7.38199e-21	0.0253	-9.38	17:43056905-17:45876022
17q21.31	KANSL1-AS1	lncRNA	Brain_Cerebellum	0.633362	28	-0.0690925	7.32908e-21	0.016	-9.25	17:43056905-17:45876022
17q21.31	KANSL1-AS1	lncRNA	Brain_Cortex	0.674248	29	-0.0258994	4.022e-20	0.000423	-6.07	17:43056905-17:45876022
17q21.31	KANSL1-AS1	lncRNA	Brain_Frontal_Cortex_BA9	0.63142	30	-0.0254843	9.67995e-20	0.00626	-8.68	17:43056905-17:45876022
17q21.31	KANSL1-AS1	lncRNA	Brain_Hippocampus	0.597598	29	-0.0276801	6.09278e-20	0.0776	-9.17	17:43056905-17:45876022
17q21.31	KANSL1-AS1	lncRNA	Brain_Hypothalamus	0.552353	15	-0.0294972	1.84826e-20	0.000263	-7.64	17:43056905-17:45876022
17q21.31	KANSL1-AS1	lncRNA	Brain_Nucleus_accumbens_basal_ganglia	0.598046	25	-0.0637236	5.36019e-21	0.236	-9.27	17:43056905-17:45876022
17q21.31	KANSL1-AS1	lncRNA	Brain_Putamen_basal_ganglia	0.608355	28	-0.0616033	1.58516e-21	0.433	-9.44	17:43056905-17:45876022
17q21.31	KANSL1-AS1	lncRNA	Brain_Spinal_cord_cervical_c-1	0.546919	24	-0.0715688	4.99627e-23	0.981	-9.68	17:43056905-17:45876022
17q21.31	KANSL1-AS1	lncRNA	Brain_Substantia_nigra	0.465421	17	-0.0256148	1.18477e-20	0.000243	-7.34	17:43056905-17:45876022
17q21.31	KANSL1-AS1	lncRNA	Colon_Sigmoid	0.630123	43	-0.0257076	2.8424e-20	0.000596	-4.68	17:43056905-17:45876022
17q21.31	KANSL1-AS1	lncRNA	Colon_Transverse	0.642342	39	-0.027145	1.7833e-20	0.000991	2.57	17:43056905-17:45876022
17q21.31	KANSL1-AS1	lncRNA	Liver	0.667718	23	-0.0557807	6.66979e-21	0.992	-9.24	17:43056905-17:45876022
17q21.31	KANSL1-AS1	lncRNA	Pancreas	0.492137	23	-0.0570112	4.33342e-21	0.48	-9.26	17:43056905-17:45876022
17q21.31	KANSL1-AS1	lncRNA	Pituitary	0.67463	33	-0.0264317	4.71165e-20	0.000944	-8.06	17:43056905-17:45876022
17q21.31	KANSL1-AS1	lncRNA	Small_Intestine_Terminal_Ileum	0.569897	22	-0.0548917	5.16873e-21	0.206	-9.23	17:43056905-17:45876022
17q21.31	KANSL1-AS1	lncRNA	Spleen	0.517859	24	-0.0583104	1.23904e-20	0.00645	-9.22	17:43056905-17:45876022
17q21.31	KANSL1-AS1	lncRNA	Stomach	0.602442	25	-0.0693031	8.23114e-14	0.000283	-7.01	17:43056905-17:45876022
17q21.31	KANSL1-AS1	lncRNA	Whole_Blood	0.655289	27	-0.0562899	4.98457e-21	0.279	-9.24	17:43056905-17:45876022
19p12	AC025811.1	lnRNA	Pancreas	0.388462	47	-0.0135348	5.87639e-07
