# Supplementary material for: Joint analysis of proteome, transcriptome, and multi-trait analysis to identify novel Parkinson’s disease risk genes
Source: Aging (Albany NY). 2024 Jan 17;16(2):1555–80. doi: 10.18632/aging.205444 (PMC10866412; doi:10.18632/aging.205444)
Supplement: Supplementary Table 17 [file aging-16-205444-s016.xlsx]

## Sheet: Sheet1
Supplementary Table 17. Twenty-six expression-trait associations for genes identified in the present and previous TWAS (PD MTAG).
Region	Gene name	Type	The present study						Previous TWAS
			Model	Z score	effect size	P-value	R2	Number of SNPs in models	Model	Z score	P-value	References (PMID)
1q32.1	RAB29	protein	Brain_Amygdala	6.42436	0.0276492	1.32427e-10	0.0502632	9	BRAIN.RNASEQ	8.11914	4.69e-16	33523105
			Brain_Anterior_cingulate_cortex_BA24	7.0186	0.0481682	2.2411e-12	0.116051	10	Dorsolateral prefrontal cortex	4.33801	1.44e-05	30824768
			Brain_Caudate_basal_ganglia	6.37283	0.021404	1.85572e-10	0.198474	19	Dorsolateral prefrontal cortex	4.33801	1.44e-05	30824768
			Brain_Cerebellar_Hemisphere	6.23579	0.02217	4.49508e-10	0.201812	12
			Brain_Cerebellum	6.26416	0.0218834	3.74849e-10	0.240443	13
			Brain_Cortex	6.86472	0.0370417	6.66204e-12	0.169617	10
			Brain_Frontal_Cortex_BA9	6.67013	0.0513207	2.5558e-11	0.176867	10
			Brain_Hippocampus	6.14179	0.0362194	8.15961e-10	0.13448	4
			Brain_Hypothalamus	6.22558	0.022593	4.79786e-10	0.186616	11
			Brain_Nucleus_accumbens_basal_ganglia	6.70483	0.0297089	2.01646e-11	0.154514	15
			Brain_Putamen_basal_ganglia	5.26974	0.0277131	1.36613e-07	0.13994	8
			Brain_Spinal_cord_cervical_c-1	6.67795	0.0295104	2.42302e-11	0.130659	14
			Brain_Substantia_nigra	6.17731	0.0229192	6.52014e-10	0.172764	7
			Colon_Sigmoid	5.9635	0.016355	2.46893e-09	0.308003	18
			Colon_Transverse	6.03542	0.0180873	1.58548e-09	0.354587	22
			Liver	6.02334	0.0181774	1.70855e-09	0.214789	12
			Pancreas	6.16514	0.0195918	7.04189e-10	0.199003	19
			Pituitary	6.15837	0.031471	7.34986e-10	0.187025	8
			Small_Intestine_Terminal_Ileum	6.10053	0.0187672	1.05718e-09	0.229091	13
			Spleen	5.92541	0.0172077	3.11518e-09	0.15196	18
			Stomach	5.96863	0.017192	2.39252e-09	0.316013	21
			Whole_Blood	4.95817	0.0172081	7.116e-07	0.287594	12
			Nerve_Tibial	6.06371	0.0181872	1.33019e-09	0.25139	12
2q21.3	TMEM163	protein	Brain_Cortex	5.50711	0.539834	3.6478e-08	0.10403	15	BRAIN.RNASEQ	7.11075	1.15e-12	33523105
									Dorsolateral prefrontal cortex	4.80129	1.58e-06	30824768
4p15.32	CD38	protein	Brain_Amygdala	-7.46541	-0.0587021	8.30407e-14	0.0780681	2	BRAIN.RNASEQ	-9.60442	7.66e-22	33523105
			Brain_Anterior_cingulate_cortex_BA24	-7.40565	-0.0459645	1.30505e-13	0.104741	6	Brain Cortex	-6.85	0.752	34504106
			Brain_Caudate_basal_ganglia	-7.59397	-0.0404053	3.1024e-14	0.204845	6	Dorsolateral prefrontal cortex	-4.55607	5.21e-06	30824768
			Brain_Cortex	-7.72087	-0.0423511	1.15537e-14	0.232332	14
			Brain_Frontal_Cortex_BA9	-7.63252	-0.0466623	2.30203e-14	0.0614855	11
			Brain_Hypothalamus	-7.72386	-0.0463047	1.12862e-14	0.0719161	7
			Brain_Nucleus_accumbens_basal_ganglia	-7.2415	-0.0296317	4.43746e-13	0.179572	21
			Brain_Putamen_basal_ganglia	-7.5476	-0.0414831	4.43365e-14	0.157942	6
4p16.3	GAK	protein	Brain_Anterior_cingulate_cortex_BA24	6.34454	0.268764	2.23092e-10	0.112279	3	Brain Cerebellum	5.21	1.85e-07	34504106
			Brain_Cerebellar_Hemisphere	6.86507	0.0298382	6.64591e-12	0.13697	21
			Brain_Cerebellum	6.99474	0.0365589	2.65748e-12	0.100946	18
			Brain_Nucleus_accumbens_basal_ganglia	4.81027	0.165289	1.50727e-06	0.0294385	9
	IDUA	protein	Brain_Anterior_cingulate_cortex_BA24	-7.93729	-0.214343	2.0664e-15	0.0341253	5	BRAIN.RNASEQ	-8.33811	7.55e-17	33523105
			Brain_Cerebellum	-5.47619	-0.0278856	4.34584e-08	0.173568	25
			Brain_Cortex	-7.08349	-0.0857568	1.40565e-12	0.0351469	11
			Brain_Frontal_Cortex_BA9	-7.86032	-0.22053	3.83154e-15	0.0374087	5
			Brain_Hippocampus	-7.55777	-0.24425	4.10053e-14	0.0459564	5
			Brain_Substantia_nigra	-6.1082	-0.805383	1.00758e-09	0.0523153	2
			Colon_Sigmoid	-6.51835	-0.0441093	7.10856e-11	0.251711	29
			Colon_Transverse	-5.23219	-0.0308544	1.67513e-07	0.274327	63
			Pancreas	-6.68501	-0.0506134	2.30915e-11	0.221303	28
			Pituitary	-6.51477	-0.0621252	7.28027e-11	0.0902604	18
			Small_Intestine_Terminal_Ileum	-8.76381	-0.162601	1.88755e-18	0.130231	5
			Spleen	-6.63279	-0.0452319	3.29399e-11	0.235126	27
			Stomach	-8.39169	-0.0849307	4.79199e-17	0.189243	9
			Whole_Blood	-6.34475	-0.0413288	2.22786e-10	0.175811	51
			Nerve_Tibial	-5.16561	-0.0285117	2.39656e-07	0.32618	63
	TMEM175	protein	Brain_Amygdala	-6.85462	-0.0638827	7.15038e-12	0.0888786	2	BRAIN.RNASEQ_SPLICING	8.57145	1.02e-17	33523105
			Brain_Caudate_basal_ganglia	-4.97152	-0.0347233	6.64306e-07	0.0795598	9
			Brain_Cerebellar_Hemisphere	-6.88221	-0.0574463	5.89326e-12	0.180382	2
			Brain_Cerebellum	-7.23114	-0.0291364	4.78973e-13	0.213324	4
			Brain_Cortex	-5.37265	-0.0249354	7.75879e-08	0.137569	17
			Brain_Frontal_Cortex_BA9	-5.38226	-0.0262747	7.35581e-08	0.160592	9
			Brain_Hippocampus	-6.8002	-0.118396	1.04475e-11	0.0611415	1
			Brain_Hypothalamus	-6.81608	-0.0561762	9.35597e-12	0.028672	5
			Brain_Nucleus_accumbens_basal_ganglia	-6.61791	-0.0447385	3.64314e-11	0.0467531	7
			Brain_Putamen_basal_ganglia	-5.54213	-0.0527241	2.98806e-08	0.101643	5
			Brain_Spinal_cord_cervical_c-1	-6.8002	-0.0953206	1.04475e-11	0.0771838	1
			Brain_Substantia_nigra	-6.8002	-0.105201	1.04475e-11	0.0939655	1
			Colon_Sigmoid	-6.14466	-0.0799017	8.01335e-10	0.0668863	5
			Pancreas	-6.80074	-0.069304	1.04082e-11	0.0200741	7
			Pituitary	-6.78777	-0.0628537	1.13883e-11	0.115753	7
			Small_Intestine_Terminal_Ileum	-6.8002	-0.132672	1.04475e-11	0.0394536	1
			Spleen	-5.37852	-0.0580077	7.50987e-08	0.0497361	13
	SCARB2	protein	Brain_Hypothalamus	6.73876	0.0737604	1.59742e-11	0.0327947	13	CMC.BRAIN.RNASEQ	3.55776	0.000374	1
			Brain_Putamen_basal_ganglia	6.25852	0.0631016	3.88656e-10	0.116191	15
			Whole_Blood	5.92721	0.0298195	3.08131e-09	0.0979118	20
			Brain_Cerebellum	5.91432	0.0427684	3.33247e-09	0.101811	21
			Brain_Cortex	5.81069	0.100653	6.22143e-09	0.0272325	5
			Brain_Nucleus_accumbens_basal_ganglia	5.3687	0.0705935	7.93075e-08	0.106298	7
			Brain_Frontal_Cortex_BA9	5.25154	0.0450204	1.50833e-07	0.0772546	24
			Brain_Cerebellar_Hemisphere	5.2438	0.0737091	1.57303e-07	0.0462841	7
4q21.1	FAM47E	protein	Brain_Substantia_nigra	-4.50769	-0.0412264	6.55376e-06	0.372821	6	BRAIN.RNASEQ_SPLICING	6.42905	1.28e-10	33523105
			Pancreas	-5.3589	-0.0166382	8.37295e-08	0.558839	14
			Spleen	-5.46176	-0.0295016	4.71424e-08	0.353972	15
			Stomach	-5.30836	-0.020945	1.10617e-07	0.389163	22
			Nerve_Tibial	-5.40856	-0.0260137	6.35323e-08	0.449883	47
4q22.1	MMRN1	protein	Brain_Amygdala	9.65025	0.0877334	4.90379e-22	0.322686	12	BRAIN.RNASEQ	10.2062	1.86e-24	33523105
			Brain_Anterior_cingulate_cortex_BA24	7.29503	0.0221093	2.98595e-13	0.278918	48	Brain Frontal cortex BA9	9.34	9.49e-21	34504106
			Brain_Caudate_basal_ganglia	7.93953	0.027589	2.02942e-15	0.198752	18	Dorsolateral prefrontal cortex	6.51839	7.11e-11	30824768
			Brain_Cerebellar_Hemisphere	8.03367	0.112497	9.45997e-16	0.132962	6
			Brain_Cerebellum	7.08519	0.0292787	1.38849e-12	0.141672	6
			Brain_Cortex	8.45076	0.0388969	2.89405e-17	0.177688	18
			Brain_Frontal_Cortex_BA9	8.62637	0.0374023	6.3331e-18	0.240942	20
			Brain_Hippocampus	8.86724	0.0856245	7.49782e-19	0.270086	8
			Brain_Hypothalamus	9.13166	0.0746475	6.74539e-20	0.187483	14
			Brain_Nucleus_accumbens_basal_ganglia	9.00361	0.0395692	2.18406e-19	0.172751	14
			Brain_Putamen_basal_ganglia	8.34843	0.0346969	6.91765e-17	0.301816	16
			Brain_Spinal_cord_cervical_c-1	7.87509	0.0241399	3.40495e-15	0.155435	26
			Brain_Substantia_nigra	8.99812	0.0696723	2.29619e-19	0.25494	12
			Colon_Transverse	8.13082	0.221078	4.26392e-16	0.0226414	9
			Liver	7.28464	0.180062	3.22542e-13	0.1707	14
			Pituitary	8.66481	0.0804672	4.5228e-18	0.221667	15
			Stomach	8.11776	0.219571	4.74856e-16	0.060042	8
			Nerve_Tibial	7.87582	0.195928	3.38523e-15	0.163742	11
	SNCA	protein	Brain_Amygdala	-5.55445	-0.0951275	2.78494e-08	0.0498553	4	BRAIN.RNASEQ	-15.4946	3.77e-54	33523105
			Brain_Caudate_basal_ganglia	-7.74805	-0.16407	9.33109e-15	0.0385143	4
5q12.1	ERCC8		Brain_Nucleus_accumbens_basal_ganglia	-5.068	-0.0287558	4.02015e-07	0.0495595	21	CMC.BRAIN.RNASEQ	-3.61273	0.000303	1
			Spleen	5.28958	0.0305623	1.22598e-07	0.0865493	6
7p15.3	GPNMB	protein	Colon_Sigmoid	5.14974	0.331747	2.60849e-07	0.0588498	9	Brain_Cortex	8.6267	6.31e-18	33523105
			Liver	5.49019	0.297596	4.01497e-08	0.0843588	7	Brain Amygdala	5.84	5.31e-09	34504106
			Spleen	4.97065	0.202398	6.67277e-07	0.177301	12	Dorsolateral prefrontal cortex	5.4963	3.88e-08	30824768
			Stomach	4.9359	0.61769	7.9782e-07	0.0668104	6
			Whole_Blood	6.04877	0.108335	1.45957e-09	0.0541513	9
	NUPL2	protein	Brain_Amygdala	5.07269	0.0240081	3.92232e-07	0.158159	4	Brain_Cerebellar_Hemisphere	8.505	1.82e-17	33523105
			Brain_Anterior_cingulate_cortex_BA24	5.1538	0.0220437	2.55265e-07	0.340283	13	Brain Cerebella hemisphere	5.69	1.24e-08	34504106
			Brain_Caudate_basal_ganglia	5.25171	0.034265	1.50697e-07	0.295426	15
			Brain_Cortex	5.24638	0.0187116	1.55118e-07	0.388835	10
			Brain_Frontal_Cortex_BA9	5.23927	0.0201071	1.61214e-07	0.393711	20
			Brain_Hippocampus	5.19541	0.027547	2.0427e-07	0.348355	12
			Brain_Hypothalamus	5.08338	0.0276787	3.70783e-07	0.325135	15
			Brain_Putamen_basal_ganglia	5.25037	0.0342956	1.51796e-07	0.243198	15
			Brain_Spinal_cord_cervical_c-1	5.75597	0.109644	8.61466e-09	0.431651	4
			Brain_Substantia_nigra	4.96476	0.0334184	6.87857e-07	0.388957	17
			Pancreas	5.47597	0.0579186	4.35114e-08	0.0483793	15
			Pituitary	5.39069	0.0321797	7.01879e-08	0.244911	14
			Small_Intestine_Terminal_Ileum	5.27727	0.0511748	1.3112e-07	0.148018	12
			Spleen	5.08833	0.0461763	3.61226e-07	0.361777	16
			Stomach	5.1305	0.0489986	2.88974e-07	0.128353	14
			Whole_Blood	5.33792	0.0634734	9.4021e-08	0.069935	11
12q24.31	HIP1R	protein	Brain_Putamen_basal_ganglia	4.74727	0.0687176	2.06176e-06	0.0475957	2	BRAIN.RNASEQ	-6.43021	1.27e-10	33523105
16p11.2	CCDC189	protein	Brain_Amygdala	5.4452	0.096639	5.17462e-08	0.109317	1	Brain Cortex	5.91	3.35e-09	34504106
			Brain_Anterior_cingulate_cortex_BA24	6.08189	0.0427632	1.18774e-09	0.0914856	7
			Brain_Caudate_basal_ganglia	6.05341	0.0415869	1.41815e-09	0.182368	7
			Brain_Cerebellar_Hemisphere	5.50288	0.0584002	3.7363e-08	0.0513377	12
			Brain_Cerebellum	6.13588	0.0481316	8.46894e-10	0.0420856	7
			Brain_Cortex	6.03389	0.0405747	1.60055e-09	0.216613	7
			Brain_Frontal_Cortex_BA9	5.90272	0.0269945	3.57553e-09	0.198962	14
			Brain_Hippocampus	6.13683	0.0468458	8.41829e-10	0.155072	7
			Brain_Hypothalamus	6.05394	0.0259188	1.41349e-09	0.13932	8
			Brain_Nucleus_accumbens_basal_ganglia	5.91574	0.0276627	3.30392e-09	0.334241	13
			Brain_Putamen_basal_ganglia	6.0836	0.0429922	1.1751e-09	0.0438102	7
			Pancreas	6.07471	0.0500404	1.24214e-09	0.0745071	7
			Pituitary	5.9464	0.0197381	2.74107e-09	0.407566	11
			Stomach	6.18935	0.0637416	6.04126e-10	0.0219184	6
			Nerve_Tibial	5.34778	0.0361818	8.90382e-08	0.0675398	3
	HSD3B7	protein	Brain_Amygdala	-5.98346	-0.239236	2.18442e-09	0.0725123	5	BRAIN.RNASEQ	-6.1356	8.48e-10	33523105
			Brain_Caudate_basal_ganglia	-5.97924	-0.253398	2.24182e-09	0.0576822	5	Dorsolateral prefrontal cortex	-4.2361	2.27e-05	30824768
			Brain_Cerebellar_Hemisphere	-6.32259	-0.31811	2.57218e-10	0.0255071	5
			Brain_Cortex	-6.42524	-0.0570157	1.31664e-10	0.0635946	9
			Brain_Frontal_Cortex_BA9	-6.31819	-0.31358	2.64639e-10	0.0635627	5
			Brain_Hypothalamus	-5.97622	-0.257831	2.28373e-09	0.103941	5
			Colon_Sigmoid	5.1894	0.025579	2.10968e-07	0.0658505	17
			Colon_Transverse	-5.29543	-0.200707	1.18735e-07	0.190759	7
			Liver	6.4885	1.97765	8.66954e-11	0.118633	5
			Small_Intestine_Terminal_Ileum	-6.19065	-0.31725	5.99161e-10	0.180163	5
			Nerve_Tibial	4.97118	0.0679098	6.65462e-07	0.0567444	12
	RNF40	protein	Brain_Amygdala	-4.96162	-0.196745	6.99091e-07	0.0689848	2	Brain Cerebella hemisphere	-6.24	0.442	34504106
			Brain_Caudate_basal_ganglia	-5.03993	-0.0277953	4.65697e-07	0.150054	10
			Brain_Cerebellum	-4.98583	-0.0266759	6.16961e-07	0.182176	11
			Brain_Hippocampus	-5.01632	-0.0334746	5.26718e-07	0.063903	8
			Brain_Nucleus_accumbens_basal_ganglia	-6.03075	-0.103657	1.63199e-09	0.154774	8
			Brain_Putamen_basal_ganglia	-4.75282	-0.044783	2.00604e-06	0.149688	7
			Brain_Substantia_nigra	-4.82289	-0.0446108	1.41492e-06	0.164184	8
			Pituitary	-4.97527	-0.0300736	6.51552e-07	0.0807554	10
			Spleen	5.80293	0.0237643	6.51671e-09	0.0683224	7
			Brain_Putamen_basal_ganglia	5.84573	0.0525951	5.04354e-09	0.0522179	8
			Brain_Substantia_nigra	5.9253	0.130729	3.1173e-09	0.0484155	4
			Colon_Transverse	-4.85212	-0.085346	1.22151e-06	0.114132	11
			Liver	-5.67874	-0.176434	1.3569e-08	0.0457757	5
			Pancreas	-5.67874	-0.205626	1.3569e-08	0.0227463	5
			Small_Intestine_Terminal_Ileum	-5.67874	-0.229123	1.3569e-08	0.07389	5
			Spleen	-5.67874	-0.158482	1.3569e-08	0.16159	3
			Whole_Blood	-5.67874	-0.351634	1.3569e-08	0.0119512	7
			Nerve_Tibial	-6.49695	-0.0724664	8.19642e-11	0.11129	11
	VKORC1	protein	Liver	-5.41962	-0.253991	5.9727e-08	0.520342	8	BRAIN.RNASEQ	5.3375	9.42e-08	33523105
			Pituitary	5.02642	0.800585	4.99708e-07	0.0659257	7	Brain Cortex	5.95	2.66e-09	34504106
17p12	ZSWIM7	protein	Brain_Amygdala	5.2253	0.0308902	1.73875e-07	0.266058	8	Brain Cerebella hemisphere	-5.38	7.25e-08	34504106
			Brain_Anterior_cingulate_cortex_BA24	5.54997	0.0352617	2.85725e-08	0.544613	11
			Brain_Caudate_basal_ganglia	5.28485	0.0338114	1.25805e-07	0.34516	3
			Brain_Cerebellar_Hemisphere	-5.45793	-0.0253961	4.81717e-08	0.33488	6
			Brain_Cerebellum	-5.48888	-0.0224155	4.04487e-08	0.425497	7
			Brain_Cortex	5.51672	0.0276409	3.45381e-08	0.515311	5
			Brain_Frontal_Cortex_BA9	5.52778	0.0360733	3.24309e-08	0.38576	12
			Brain_Hippocampus	5.59395	0.0324022	2.21955e-08	0.117023	5
			Brain_Hypothalamus	5.74661	0.0562835	9.10509e-09	0.301391	17
			Brain_Nucleus_accumbens_basal_ganglia	5.28485	0.0503441	1.25805e-07	0.350138	3
			Brain_Putamen_basal_ganglia	5.04034	0.0333195	4.64697e-07	0.294888	15
			Colon_Sigmoid	-4.86688	-0.0712016	1.13373e-06	0.0172469	11
			Colon_Transverse	-5.36479	-0.918718	8.10433e-08	0.0944066	3
			Liver	-4.86986	-0.0726352	1.11677e-06	0.118184	10
			Pituitary	-5.27291	-0.118276	1.34278e-07	0.186933	3
			Small_Intestine_Terminal_Ileum	-5.27248	-0.0143372	1.3459e-07	0.314321	7
			Spleen	-5.57474	-0.0145746	2.47904e-08	0.51671	18
			Nerve_Tibial	-4.68393	-0.0868636	2.81422e-06	0.0344633	11
17q21.31	ARL17A	protein	Brain_Caudate_basal_ganglia	-7.66263	-0.0447355	1.82158e-14	0.379656	14	Brain Putamen basal ganglia	-9.31	1.33e-20	34504106
			Brain_Cerebellar_Hemisphere	-7.36713	-0.0238857	1.74344e-13	0.581608	36
			Brain_Cerebellum	-7.35483	-0.0357254	1.9117e-13	0.594722	34
			Brain_Cortex	-7.79048	-0.0408503	6.67565e-15	0.518643	19
			Brain_Frontal_Cortex_BA9	-7.84883	-0.0410355	4.19921e-15	0.527336	18
			Brain_Hypothalamus	-7.29622	-0.042276	2.95974e-13	0.433168	22
			Brain_Nucleus_accumbens_basal_ganglia	-8.15546	-0.0375882	3.47847e-16	0.378843	17
			Brain_Putamen_basal_ganglia	-7.75271	-0.0352208	8.99553e-15	0.280291	25
			Brain_Spinal_cord_cervical_c-1	-6.53889	-0.0532401	6.19762e-11	0.152405	10
			Brain_Substantia_nigra	-7.38368	-0.0469438	1.53978e-13	0.156445	13
			Liver	-6.88358	-0.0438698	5.8368e-12	0.389408	29
			Pituitary	-7.48304	-0.0314163	7.26244e-14	0.562169	35
			Stomach	-5.40209	-0.0409013	6.58707e-08	0.393787	26
	FMNL1	protein	Brain_Cerebellar_Hemisphere	8.35048	0.0427399	6.79855e-17	0.364383	17	Brain_Cerebellar_Hemisphere	7.0706	1.54e-12	33523105
			Brain_Cerebellum	9.18142	0.0450566	4.25448e-20	0.344783	12	Brain Cerebellun	8.65	4.95e-18	34504106
	LRRC37A	protein	Brain_Anterior_cingulate_cortex_BA24	-9.21111	-0.0341893	3.22764e-20	0.610701	9	Brain_Cerebellum	-14.1662	1.48e-45	33523105
			Brain_Caudate_basal_ganglia	-9.21111	-0.0368226	3.22764e-20	0.594686	12	Brain Cerebellum	-9.36	7.85e-21	34504106
			Brain_Cerebellum	-9.21111	-0.0379689	3.22764e-20	0.639676	23
			Brain_Cortex	-8.54054	-0.0595849	1.33592e-17	0.664468	23
			Brain_Frontal_Cortex_BA9	-7.09166	-0.0619184	1.32508e-12	0.604939	21
			Brain_Hippocampus	-8.63039	-0.0711093	6.11452e-18	0.545917	22
			Brain_Hypothalamus	-8.83391	-0.0551819	1.01079e-18	0.64602	29
			Brain_Nucleus_accumbens_basal_ganglia	-8.78391	-0.0640615	1.57888e-18	0.642156	29
			Brain_Putamen_basal_ganglia	-9.21111	-0.548889	3.22764e-20	0.617545	17
			Brain_Spinal_cord_cervical_c-1	-9.21111	-0.0753365	3.22764e-20	0.426441	14
			Brain_Substantia_nigra	-9.21111	-0.0597968	3.22764e-20	0.449896	13
			Colon_Sigmoid	-9.21111	-0.146782	3.22764e-20	0.562587	21
			Colon_Transverse	-9.61025	-0.0408456	7.23708e-22	0.471087	51
			Pituitary	-9.21111	-0.0362986	3.22764e-20	0.674293	11
			Small_Intestine_Terminal_Ileum	-9.21111	-0.138527	3.22764e-20	0.507197	20
			Spleen	-9.21111	-0.149967	3.22764e-20	0.552574	20
			Stomach	-9.21111	-0.15148	3.22764e-20	0.453524	19
			Whole_Blood	-9.21111	-1.5984	3.22764e-20	0.314815	18
			Nerve_Tibial	-9.21111	-0.164016	3.22764e-20	0.469285	19
	MAPT	protein	Brain_Cerebellar_Hemisphere	8.01965	0.0868237	1.06047e-15	0.0518215	5	Brain_Frontal_Cortex_BA9	15.8054	2.85e-56	33523105
			Brain_Cerebellum	6.65343	0.0784141	2.86333e-11	0.0684396	5
			Colon_Sigmoid	5.0033	0.0154686	5.63579e-07	0.464904	31
			Spleen	-10.0578	-0.0481328	8.48557e-24	0.0829377	8
	PLEKHM1	protein	Brain_Amygdala	-8.24043	-0.0655769	1.71597e-16	0.170615	9	Brain_Cerebellar_Hemisphere	15.5949	7.89e-55	33523105
			Brain_Anterior_cingulate_cortex_BA24	-8.29181	-0.0966036	1.11539e-16	0.198664	5	Brain Cerebella hemisphere	8.94	3.76e-19	34504106
			Brain_Caudate_basal_ganglia	-8.2467	-0.0645493	1.62827e-16	0.206555	11
			Brain_Cerebellum	8.26266	0.0735669	1.4246e-16	0.602922	35
			Brain_Cortex	-8.27037	-0.0697437	1.33546e-16	0.287031	7
			Brain_Frontal_Cortex_BA9	-8.28453	-0.0685396	1.18575e-16	0.222759	13
			Brain_Hippocampus	-8.46004	-0.0879054	2.67293e-17	0.105906	8
			Brain_Hypothalamus	-8.02947	-0.0732515	9.78975e-16	0.103695	14
			Brain_Nucleus_accumbens_basal_ganglia	-4.92682	-0.0545306	8.35772e-07	0.279554	17
			Brain_Putamen_basal_ganglia	-8.20071	-0.0698798	2.38965e-16	0.271433	14
			Colon_Sigmoid	-8.53576	-0.097602	1.39242e-17	0.0457754	7
			Colon_Transverse	-8.48919	-0.103747	2.08086e-17	0.0392162	5
			Pancreas	-8.37104	-0.0851373	5.71112e-17	0.0134878	5
			Pituitary	-8.23655	-0.0796921	1.77244e-16	0.0758392	13
			Spleen	-8.45071	-0.0628331	2.89528e-17	0.0860328	14
			Stomach	-8.52277	-0.1005	1.55786e-17	0.0320032	6
			Nerve_Tibial	-8.28804	-1.41129	1.15132e-16	0.0197496	2
	SPPL2C	protein	Brain_Cerebellar_Hemisphere	-9.73266	-0.0449228	2.18799e-22	0.368775	11	Brain Cerebella hemisphere	-6	1.98e-09	34504106
			Brain_Cerebellum	-9.69634	-0.0280959	3.12495e-22	0.37745	7
			Brain_Cortex	-7.15757	-0.0915443	8.21224e-13	0.0675875	8
			Brain_Frontal_Cortex_BA9	-6.60989	-0.0508445	3.84602e-11	0.0668948	11
17q21.31-q21.32	LRRC37A2	protein	Brain_Cerebellar_Hemisphere	-9.20387	-0.0287618	3.4527e-20	0.672032	26	Brain_Putamen_basal_ganglia	-14.8551	6.45e-50	33523105
			Brain_Cerebellum	-9.24088	-0.0286702	2.44489e-20	0.698662	28	Brain Hypothalamu	-9.63	6.12e-22	34504106
			Brain_Cortex	-8.29812	-0.029625	1.05775e-16	0.730578	46
			Brain_Frontal_Cortex_BA9	-8.55724	-0.0316882	1.15602e-17	0.701871	31
			Brain_Hippocampus	-9.06269	-0.0299221	1.27275e-19	0.617229	22
			Brain_Hypothalamus	-9.16	-0.0281395	5.18953e-20	0.676612	25
			Brain_Putamen_basal_ganglia	-9.26079	-0.0289433	2.02918e-20	0.590505	19
			Colon_Transverse	-9.19409	-0.030277	3.78199e-20	0.497307	33
			Pancreas	-9.17444	-0.0313119	4.53938e-20	0.427262	32
			Spleen	-8.6112	-0.0383557	7.23004e-18	0.487414	28
			Stomach	-9.19931	-0.032232	3.60252e-20	0.515971	30
			Whole_Blood	-5.91843	-0.0306668	3.25029e-09	0.494732	57
			Nerve_Tibial	-8.92884	-0.0377195	4.30509e-19	0.592856	40
