# Supplementary material for: Joint analysis of proteome, transcriptome, and multi-trait analysis to identify novel Parkinson’s disease risk genes
Source: Aging (Albany NY). 2024 Jan 17;16(2):1555–80. doi: 10.18632/aging.205444 (PMC10866412; doi:10.18632/aging.205444)
Supplement: Supplementary Table 18 [file aging-16-205444-s017.xlsx]

## Sheet: Sheet1
Supplementary Table 18. Fine-mapping of causal gene sets (FOCUS) of PD MTAG summary statistics.
ens_gene_id	mol_name	tissue	type	chrom	cv.R2	cv.R2.pval	twas_z	pip	region
ENSG00000117280	RAB29	Brain_Amygdala1	protein_coding	chr1	0.0502632	0.010644	6.29	1	1:204681068-1:205922403
ENSG00000127419	TMEM175	Brain_Amygdala1	protein_coding	chr4	0.0888786	0.000600328	-6.6	1	4:695146-4:1478711
ENSG00000004468	CD38	Brain_Amygdala1	protein_coding	chr4	0.0780681	0.00134278	-7.16	1	4:15147446-4:15926136
ENSG00000138722	MMRN1	Brain_Amygdala1	protein_coding	chr4	0.322686	2.2e-12	8.8	1	4:90231746-4:91560677
ENSG00000117280	RAB29	Brain_Anterior_cingulate_cortex_BA241	protein_coding	chr1	0.116051	2.42e-05	6.72	1	1:204681068-1:205922403
ENSG00000127415	IDUA	Brain_Anterior_cingulate_cortex_BA241	protein_coding	chr4	0.0341253	0.0250955	-7.9	1	4:695146-4:1478711
ENSG00000004468	CD38	Brain_Anterior_cingulate_cortex_BA241	protein_coding	chr4	0.104741	6.37e-05	-7.4	1	4:15147446-4:15926136
ENSG00000138722	MMRN1	Brain_Anterior_cingulate_cortex_BA241	protein_coding	chr4	0.278918	6.23e-12	7.48	1	4:90231746-4:91560677
ENSG00000117280	RAB29	Brain_Caudate_basal_ganglia1	protein_coding	chr1	0.198474	7.56e-11	6.14	1	1:204681068-1:205922403
ENSG00000004468	CD38	Brain_Caudate_basal_ganglia1	protein_coding	chr4	0.204845	3.46e-11	-7.47	1	4:15147446-4:15926136
ENSG00000117280	RAB29	Brain_Cerebellar_Hemisphere1	protein_coding	chr1	0.201812	4.49e-10	6.05	1	1:204681068-1:205922403
ENSG00000145214	DGKQ	Brain_Cerebellar_Hemisphere1	protein_coding	chr4	0.130992	8.59e-07	-10.4	1	4:695146-4:1478711
ENSG00000138722	MMRN1	Brain_Cerebellar_Hemisphere1	protein_coding	chr4	0.132962	7.01e-07	7.37	1	4:90231746-4:91560677
ENSG00000117280	RAB29	Brain_Cerebellum1	protein_coding	chr1	0.240443	4.84e-14	6.07	1	1:204681068-1:205922403
ENSG00000145214	DGKQ	Brain_Cerebellum1	protein_coding	chr4	0.219367	8.59e-13	-10	1	4:695146-4:1478711
ENSG00000138722	MMRN1	Brain_Cerebellum1	protein_coding	chr4	0.141672	1.95e-08	6.73	1	4:90231746-4:91560677
ENSG00000117280	RAB29	Brain_Cortex1	protein_coding	chr1	0.169617	8.51e-10	6.64	1	1:204681068-1:205922403
ENSG00000004468	CD38	Brain_Cortex1	protein_coding	chr4	0.232332	2.53e-13	-7.86	1	4:15147446-4:15926136
ENSG00000138722	MMRN1	Brain_Cortex1	protein_coding	chr4	0.177688	3.09e-10	8.06	1	4:90231746-4:91560677
ENSG00000117280	RAB29	Brain_Frontal_Cortex_BA91	protein_coding	chr1	0.176867	6.85e-09	6.3	1	1:204681068-1:205922403
ENSG00000127415	IDUA	Brain_Frontal_Cortex_BA91	protein_coding	chr4	0.0374087	0.0103312	-7.81	1	4:695146-4:1478711
ENSG00000004468	CD38	Brain_Frontal_Cortex_BA91	protein_coding	chr4	0.0614855	0.000937786	-7.75	1	4:15147446-4:15926136
ENSG00000138722	MMRN1	Brain_Frontal_Cortex_BA91	protein_coding	chr4	0.240942	5.34e-12	8.17	1	4:90231746-4:91560677
ENSG00000117280	RAB29	Brain_Hippocampus1	protein_coding	chr1	0.13448	1.27e-06	6	1	1:204681068-1:205922403
ENSG00000138722	MMRN1	Brain_Hippocampus1	protein_coding	chr4	0.270086	8.5e-13	8.15	1	4:90231746-4:91560677
ENSG00000117280	RAB29	Brain_Hypothalamus1	protein_coding	chr1	0.186616	4.05e-09	6.04	1	1:204681068-1:205922403
ENSG00000127419	TMEM175	Brain_Hypothalamus1	protein_coding	chr4	0.028672	0.027283	-6.58	1	4:695146-4:1478711
ENSG00000004468	CD38	Brain_Hypothalamus1	protein_coding	chr4	0.0719161	0.000406659	-7.83	1	4:15147446-4:15926136
ENSG00000138722	MMRN1	Brain_Hypothalamus1	protein_coding	chr4	0.187483	3.7e-09	8.49	1	4:90231746-4:91560677
ENSG00000117280	RAB29	Brain_Nucleus_accumbens_basal_ganglia1	protein_coding	chr1	0.154514	7.18e-09	6.53	1	1:204681068-1:205922403
ENSG00000127419	TMEM175	Brain_Nucleus_accumbens_basal_ganglia1	protein_coding	chr4	0.0467531	0.00199682	-6.4	1	4:695146-4:1478711
ENSG00000004468	CD38	Brain_Nucleus_accumbens_basal_ganglia1	protein_coding	chr4	0.179572	3.3e-10	-7.23	1	4:15147446-4:15926136
ENSG00000138722	MMRN1	Brain_Nucleus_accumbens_basal_ganglia1	protein_coding	chr4	0.172751	7.69e-10	8.51	1	4:90231746-4:91560677
ENSG00000004468	CD38	Brain_Putamen_basal_ganglia1	protein_coding	chr4	0.157942	8.04e-08	-7.34	1	4:15147446-4:15926136
ENSG00000138722	MMRN1	Brain_Putamen_basal_ganglia1	protein_coding	chr4	0.301816	8.64e-15	8.08	1	4:90231746-4:91560677
ENSG00000164182	NDUFAF2	Brain_Putamen_basal_ganglia1	protein_coding	chr5	0.0622328	0.00103567	5.83	1	5:58524622-5:60935451
ENSG00000117280	RAB29	Brain_Spinal_cord_cervical_c-11	protein_coding	chr1	0.130659	3.2e-05	6.49	1	1:204681068-1:205922403
ENSG00000127419	TMEM175	Brain_Spinal_cord_cervical_c-11	protein_coding	chr4	0.0771838	0.00163447	-6.46	1	4:695146-4:1478711
ENSG00000145214	DGKQ	Brain_Spinal_cord_cervical_c-11	protein_coding	chr4	0.170999	1.49e-06	-5.48	1	4:695146-4:1478711
ENSG00000138722	MMRN1	Brain_Spinal_cord_cervical_c-11	protein_coding	chr4	0.155435	4.93e-06	7.73	1	4:90231746-4:91560677
ENSG00000117280	RAB29	Brain_Substantia_nigra1	protein_coding	chr1	0.172764	4.25e-06	5.99	1	1:204681068-1:205922403
ENSG00000138722	MMRN1	Brain_Substantia_nigra1	protein_coding	chr4	0.25494	1.01e-08	8.55	1	4:90231746-4:91560677
ENSG00000145214	DGKQ	Colon_Sigmoid1	protein_coding	chr4	0.281221	1.84e-24	-8.59	1	4:695146-4:1478711
ENSG00000145214	DGKQ	Colon_Transverse1	protein_coding	chr4	0.159067	1.76e-15	-7.92	1	4:695146-4:1478711
ENSG00000138722	MMRN1	Colon_Transverse1	protein_coding	chr4	0.0226414	0.00381342	7.68	1	4:90231746-4:91560677
ENSG00000145214	DGKQ	Liver1	protein_coding	chr4	0.169699	6.33e-10	-8.39	1	4:695146-4:1478711
ENSG00000138722	MMRN1	Liver1	protein_coding	chr4	0.1707	5.57e-10	7.09	1	4:90231746-4:91560677
ENSG00000117280	RAB29	Pancreas1	protein_coding	chr1	0.199003	2.55e-16	5.88	1	1:204681068-1:205922403
ENSG00000145214	DGKQ	Pancreas1	protein_coding	chr4	0.354009	1.36e-30	-7.78	1	4:695146-4:1478711
ENSG00000117280	RAB29	Pituitary1	protein_coding	chr1	0.187025	3.21e-12	5.97	1	1:204681068-1:205922403
ENSG00000145214	DGKQ	Pituitary1	protein_coding	chr4	0.18171	7e-12	-6.8	1	4:695146-4:1478711
ENSG00000138722	MMRN1	Pituitary1	protein_coding	chr4	0.221667	1.77e-14	8.03	1	4:90231746-4:91560677
ENSG00000117280	RAB29	Small_Intestine_Terminal_Ileum1	protein_coding	chr1	0.229091	2.39e-11	5.84	1	1:204681068-1:205922403
ENSG00000145214	DGKQ	Small_Intestine_Terminal_Ileum1	protein_coding	chr4	0.186109	2.8e-09	-8.97	1	4:695146-4:1478711
ENSG00000177628	GBA	Spleen1	protein_coding	chr1	0.108994	3.58e-07	6.95	1	1:154770403-1:156336133
ENSG00000145214	DGKQ	Spleen1	protein_coding	chr4	0.607755	1.28e-47	-9.22	1	4:695146-4:1478711
ENSG00000127415	IDUA	Stomach1	protein_coding	chr4	0.189243	2.16e-16	-7.68	1	4:695146-4:1478711
ENSG00000138722	MMRN1	Stomach1	protein_coding	chr4	0.060042	8.13e-06	7.67	1	4:90231746-4:91560677
ENSG00000145214	DGKQ	Whole_Blood1	protein_coding	chr4	0.627778	1.73e-145	-8.03	1	4:695146-4:1478711
ENSG00000130783	CCDC62	Brain_Cerebellar_Hemisphere1	protein_coding	chr12	0.0988312	2.27e-05	5.64	0.999	12:122009763-12:124976982
ENSG00000138760	SCARB2	Brain_Cortex1	protein_coding	chr4	0.0272325	0.0180518	5.74	0.999	4:77130707-4:79093979
ENSG00000127415	IDUA	Brain_Hippocampus1	protein_coding	chr4	0.0459564	0.0056927	-7.4	0.999	4:695146-4:1478711
ENSG00000164182	NDUFAF2	Brain_Hippocampus1	protein_coding	chr5	0.0662406	0.000846029	5.6	0.999	5:58524622-5:60935451
ENSG00000164182	NDUFAF2	Brain_Nucleus_accumbens_basal_ganglia1	protein_coding	chr5	0.0283271	0.01665	5.75	0.999	5:58524622-5:60935451
ENSG00000117280	RAB29	Colon_Transverse1	protein_coding	chr1	0.354587	1.1e-36	5.73	0.999	1:204681068-1:205922403
ENSG00000117280	RAB29	Liver1	protein_coding	chr1	0.214789	1.8e-12	5.76	0.999	1:204681068-1:205922403
ENSG00000117280	RAB29	Spleen1	protein_coding	chr1	0.15196	1.18e-09	5.6	0.999	1:204681068-1:205922403
ENSG00000117280	RAB29	Stomach1	protein_coding	chr1	0.316013	2.18e-28	5.61	0.999	1:204681068-1:205922403
ENSG00000237765	FAM200B	Brain_Cerebellar_Hemisphere1	protein_coding	chr4	0.38673	4.14e-20	5.64	0.998	4:15147446-4:15926136
ENSG00000138760	SCARB2	Brain_Cerebellar_Hemisphere1	protein_coding	chr4	0.0462841	0.00424762	5.55	0.998	4:77130707-4:79093979
ENSG00000127415	IDUA	Brain_Cortex1	protein_coding	chr4	0.0351469	0.00710826	-7.02	0.998	4:695146-4:1478711
ENSG00000164182	NDUFAF2	Brain_Cortex1	protein_coding	chr5	0.0693051	0.000136883	5.65	0.998	5:58524622-5:60935451
ENSG00000127419	TMEM175	Brain_Putamen_basal_ganglia1	protein_coding	chr4	0.101643	2.26e-05	-5.52	0.998	4:695146-4:1478711
ENSG00000138760	SCARB2	Brain_Spinal_cord_cervical_c-11	protein_coding	chr4	0.302802	2.48e-11	5.73	0.998	4:77130707-4:79093979
ENSG00000117280	RAB29	Colon_Sigmoid1	protein_coding	chr1	0.308003	4.37e-27	5.5	0.998	1:204681068-1:205922403
ENSG00000130787	HIP1R	Brain_Caudate_basal_ganglia1	protein_coding	chr12	0.0272672	0.0213961	5.47	0.997	12:122009763-12:124976982
ENSG00000138760	SCARB2	Brain_Nucleus_accumbens_basal_ganglia1	protein_coding	chr4	0.106298	2.19e-06	5.44	0.997	4:77130707-4:79093979
ENSG00000164182	NDUFAF2	Brain_Substantia_nigra1	protein_coding	chr5	0.0420411	0.0286404	5.48	0.997	5:58524622-5:60935451
ENSG00000130783	CCDC62	Brain_Cerebellum1	protein_coding	chr12	0.111884	7.42e-07	5.41	0.996	12:122009763-12:124976982
ENSG00000130787	HIP1R	Brain_Putamen_basal_ganglia1	protein_coding	chr12	0.0475957	0.00426267	5.47	0.996	12:122009763-12:124976982
ENSG00000164182	NDUFAF2	Pancreas1	protein_coding	chr5	0.0298521	0.00246306	5.67	0.994	5:58524622-5:60935451
ENSG00000156219	ART3	Brain_Frontal_Cortex_BA91	protein_coding	chr4	0.152645	9.02e-08	-5.22	0.993	4:77130707-4:79093979
ENSG00000214401	KANSL1-AS1	Liver1	lncRNA	chr17	0.667718	3.52e-51	-9.24	0.992	17:43056905-17:45876022
ENSG00000204305	AGER	Brain_Anterior_cingulate_cortex_BA241	protein_coding	chr6	0.0457134	0.00931476	-5.23	0.989	6:31571337-6:32682664
ENSG00000127419	TMEM175	Pituitary1	protein_coding	chr4	0.115753	7.83e-08	-6.48	0.987	4:695146-4:1478711
ENSG00000127419	TMEM175	Pancreas1	protein_coding	chr4	0.0200741	0.0132591	-6.46	0.986	4:695146-4:1478711
ENSG00000127419	TMEM175	Spleen1	protein_coding	chr4	0.0497361	0.000713737	-5.17	0.986	4:695146-4:1478711
ENSG00000159314	ARHGAP27	Brain_Caudate_basal_ganglia1	protein_coding	chr17	0.122012	5.98e-07	-9.53	0.985	17:43056905-17:45876022
ENSG00000108379	WNT3	Colon_Transverse1	protein_coding	chr17	0.177168	3.11e-17	-8.8	0.985	17:43056905-17:45876022
ENSG00000127419	TMEM175	Brain_Substantia_nigra1	protein_coding	chr4	0.0939655	0.000909594	-6.46	0.984	4:695146-4:1478711
ENSG00000189157	FAM47E	Pancreas1	protein_coding	chr4	0.558839	8.76e-56	-5.29	0.984	4:77130707-4:79093979
ENSG00000204305	AGER	Brain_Frontal_Cortex_BA91	protein_coding	chr6	0.0606505	0.00101878	-5.23	0.983	6:31571337-6:32682664
ENSG00000178950	GAK	Liver1	protein_coding	chr4	0.0252105	0.0219817	2.97	0.983	4:695146-4:1478711
ENSG00000138750	NUP54	Brain_Anterior_cingulate_cortex_BA241	protein_coding	chr4	0.214078	3.63e-09	-4.37	0.982	4:77130707-4:79093979
ENSG00000152128	TMEM163	Brain_Cortex1	protein_coding	chr2	0.10403	2.4e-06	5.02	0.982	2:135159453-2:137042794
ENSG00000169242	EFNA1	Brain_Hypothalamus1	protein_coding	chr1	0.151711	1.52e-07	5.15	0.982	1:154770403-1:156336133
ENSG00000214401	KANSL1-AS1	Brain_Spinal_cord_cervical_c-11	lncRNA	chr17	0.546919	4.63e-23	-9.68	0.981	17:43056905-17:45876022
ENSG00000136243	NUPL2	Brain_Spinal_cord_cervical_c-11	protein_coding	chr7	0.431651	6.58e-17	5.51	0.98	7:22508611-7:23469560
ENSG00000198648	STK39	Brain_Caudate_basal_ganglia1	protein_coding	chr2	0.0656685	0.000310217	-5.05	0.976	2:167356254-2:169968112
ENSG00000189157	FAM47E	Brain_Anterior_cingulate_cortex_BA241	protein_coding	chr4	0.372018	2.41e-16	-4.18	0.972	4:77130707-4:79093979
ENSG00000170425	ADORA2B	Brain_Substantia_nigra1	protein_coding	chr17	0.129597	8.35e-05	5.04	0.969	17:15020965-17:16411522
ENSG00000099364	FBXL19	Brain_Substantia_nigra1	protein_coding	chr16	0.0401061	0.032649	-6.18	0.966	16:29036613-16:31382470
ENSG00000138760	SCARB2	Brain_Cerebellum1	protein_coding	chr4	0.101811	2.49e-06	5.05	0.964	4:77130707-4:79093979
ENSG00000170425	ADORA2B	Colon_Transverse1	protein_coding	chr17	0.068176	3.77e-07	5	0.964	17:15020965-17:16411522
ENSG00000279685	MAPT-IT1	Brain_Substantia_nigra1	lncRNA	chr17	0.0860082	0.00154174	-9.63	0.963	17:43056905-17:45876022
ENSG00000127419	TMEM175	Small_Intestine_Terminal_Ileum1	protein_coding	chr4	0.0394536	0.00860277	-6.46	0.963	4:695146-4:1478711
ENSG00000136235	GPNMB	Whole_Blood1	protein_coding	chr7	0.0541513	1.09e-09	5.87	0.962	7:22508611-7:23469560
ENSG00000138722	MMRN1	Brain_Caudate_basal_ganglia1	protein_coding	chr4	0.198752	7.3e-11	7.81	0.961	4:90231746-4:91560677
ENSG00000186868	MAPT	Spleen1	protein_coding	chr17	0.0829377	1.04e-05	-9.78	0.96	17:43056905-17:45876022
ENSG00000198648	STK39	Brain_Putamen_basal_ganglia1	protein_coding	chr2	0.0833798	0.000134099	-4.93	0.958	2:167356254-2:169968112
ENSG00000138760	SCARB2	Brain_Putamen_basal_ganglia1	protein_coding	chr4	0.116191	5.4e-06	4.91	0.958	4:77130707-4:79093979
ENSG00000138769	CDKL2	Stomach1	protein_coding	chr4	0.0120226	0.0486116	6.05	0.957	4:77130707-4:79093979
ENSG00000080854	IGSF9B	Brain_Hippocampus1	protein_coding	chr11	0.0414598	0.00871181	-4.92	0.954	11:133000260-11:134205993
ENSG00000160767	FAM189B	Brain_Cerebellum1	protein_coding	chr1	0.0204993	0.0386285	5.24	0.948	1:154770403-1:156336133
ENSG00000237541	HLA-DQA2	Colon_Sigmoid1	protein_coding	chr6	0.669939	4.74e-78	-4.88	0.946	6:31571337-6:32682664
ENSG00000080854	IGSF9B	Brain_Cerebellar_Hemisphere1	protein_coding	chr11	0.0271893	0.0292108	-4.88	0.945	11:133000260-11:134205993
ENSG00000264589	MAPT-AS1	Brain_Amygdala1	lncRNA	chr17	0.110245	0.000120996	9.38	0.944	17:43056905-17:45876022
ENSG00000247775	SNCA-AS1	Brain_Cerebellar_Hemisphere1	lncRNA	chr4	0.220162	5.77e-11	-5.32	0.944	4:90231746-4:91560677
ENSG00000145335	SNCA	Spleen1	protein_coding	chr4	0.0396622	0.00257623	4.86	0.941	4:90231746-4:91560677
ENSG00000247775	SNCA-AS1	Brain_Cerebellum1	lncRNA	chr4	0.268493	9.33e-16	-4.73	0.939	4:90231746-4:91560677
ENSG00000143590	EFNA3	Stomach1	protein_coding	chr1	0.0133445	0.0376857	4.85	0.938	1:154770403-1:156336133
ENSG00000127419	TMEM175	Brain_Caudate_basal_ganglia1	protein_coding	chr4	0.0795598	6.76e-05	-5.17	0.936	4:695146-4:1478711
ENSG00000080854	IGSF9B	Small_Intestine_Terminal_Ileum1	protein_coding	chr11	0.0426895	0.00623112	-4.82	0.927	11:133000260-11:134205993
ENSG00000230658	KLHL7-DT	Brain_Cerebellum1	lncRNA	chr7	0.449882	1.13e-28	-4.79	0.919	7:22508611-7:23469560
ENSG00000196118	CCDC189	Pituitary1	protein_coding	chr16	0.407566	1.56e-28	5.47	0.917	16:29036613-16:31382470
ENSG00000243368	MCCC1-AS1	Brain_Cortex1	lncRNA	chr3	0.0511726	0.00110839	-4.12	0.915	3:181511166-3:183769683
ENSG00000136243	NUPL2	Brain_Cortex1	protein_coding	chr7	0.388835	1.76e-23	5.15	0.915	7:22508611-7:23469560
ENSG00000078081	LAMP3	Brain_Putamen_basal_ganglia1	protein_coding	chr3	0.0340929	0.015933	-5	0.914	3:181511166-3:183769683
ENSG00000198648	STK39	Brain_Nucleus_accumbens_basal_ganglia1	protein_coding	chr2	0.0851189	2.52e-05	-4.77	0.911	2:167356254-2:169968112
ENSG00000179344	HLA-DQB1	Stomach1	protein_coding	chr6	0.646473	1.09e-74	-4.77	0.911	6:31571337-6:32682664
ENSG00000179344	HLA-DQB1	Brain_Cortex1	protein_coding	chr6	0.519005	4.22e-34	-4.77	0.909	6:31571337-6:32682664
ENSG00000214941	ZSWIM7	Pituitary1	protein_coding	chr17	0.186933	3.25e-12	-5	0.907	17:15020965-17:16411522
ENSG00000138750	NUP54	Colon_Sigmoid1	protein_coding	chr4	0.420497	2.52e-39	-4.9	0.905	4:77130707-4:79093979
ENSG00000099377	HSD3B7	Brain_Frontal_Cortex_BA91	protein_coding	chr16	0.0635627	0.000763156	-5.99	0.903	16:29036613-16:31382470
ENSG00000196118	CCDC189	Brain_Cerebellum1	protein_coding	chr16	0.0420856	0.00288478	5.89	0.899	16:29036613-16:31382470
ENSG00000143537	ADAM15	Brain_Spinal_cord_cervical_c-11	protein_coding	chr1	0.314826	8.28e-12	-4.76	0.899	1:154770403-1:156336133
ENSG00000117280	RAB29	Brain_Putamen_basal_ganglia1	protein_coding	chr1	0.13994	5.03e-07	4.77	0.895	1:204681068-1:205922403
ENSG00000164181	ELOVL7	Pituitary1	protein_coding	chr5	0.0306652	0.00688159	-4.73	0.894	5:58524622-5:60935451
ENSG00000127419	TMEM175	Colon_Sigmoid1	protein_coding	chr4	0.0668863	2.96e-06	-5.94	0.893	4:695146-4:1478711
ENSG00000232748	AC135050.1	Brain_Amygdala1	lncRNA	chr16	0.0473404	0.0132524	6.04	0.892	16:29036613-16:31382470
ENSG00000080854	IGSF9B	Brain_Cerebellum1	protein_coding	chr11	0.247618	1.79e-14	-4.72	0.892	11:133000260-11:134205993
ENSG00000169242	EFNA1	Brain_Cerebellar_Hemisphere1	protein_coding	chr1	0.177569	6.35e-09	4.72	0.89	1:154770403-1:156336133
ENSG00000138760	SCARB2	Brain_Hypothalamus1	protein_coding	chr4	0.0327947	0.0181121	5.47	0.889	4:77130707-4:79093979
ENSG00000136243	NUPL2	Pituitary1	protein_coding	chr7	0.244911	4.79e-16	5	0.885	7:22508611-7:23469560
ENSG00000170425	ADORA2B	Colon_Sigmoid1	protein_coding	chr17	0.189583	3.83e-16	5.02	0.884	17:15020965-17:16411522
ENSG00000204290	BTNL2	Brain_Spinal_cord_cervical_c-11	protein_coding	chr6	0.0614721	0.00512328	4.73	0.881	6:31571337-6:32682664
ENSG00000169242	EFNA1	Brain_Substantia_nigra1	protein_coding	chr1	0.103838	0.00047158	4.73	0.88	1:154770403-1:156336133
ENSG00000189157	FAM47E	Brain_Hypothalamus1	protein_coding	chr4	0.393026	5.94e-20	-3.8	0.877	4:77130707-4:79093979
ENSG00000275263	AC135048.3	Brain_Cerebellar_Hemisphere1	lncRNA	chr16	0.0667911	0.000554001	6.35	0.873	16:29036613-16:31382470
ENSG00000214941	ZSWIM7	Whole_Blood1	protein_coding	chr17	0.078956	1.27e-13	5.37	0.872	17:15020965-17:16411522
ENSG00000230658	KLHL7-DT	Colon_Transverse1	lncRNA	chr7	0.522038	1.23e-60	-4.72	0.868	7:22508611-7:23469560
ENSG00000078070	MCCC1	Brain_Cortex1	protein_coding	chr3	0.130937	9.77e-08	-1.17	0.862	3:181511166-3:183769683
ENSG00000170425	ADORA2B	Brain_Cerebellum1	protein_coding	chr17	0.104148	1.88e-06	5	0.861	17:15020965-17:16411522
ENSG00000230658	KLHL7-DT	Brain_Substantia_nigra1	lncRNA	chr7	0.586534	3.24e-23	-4.79	0.86	7:22508611-7:23469560
ENSG00000117280	RAB29	Whole_Blood1	protein_coding	chr1	0.287594	3.71e-51	4.64	0.853	1:204681068-1:205922403
ENSG00000196118	CCDC189	Brain_Hippocampus1	protein_coding	chr16	0.155072	1.67e-07	5.85	0.847	16:29036613-16:31382470
ENSG00000138760	SCARB2	Whole_Blood1	protein_coding	chr4	0.0979118	1.1e-16	4.63	0.844	4:77130707-4:79093979
ENSG00000099365	STX1B	Colon_Transverse1	protein_coding	chr16	0.0915662	3.13e-09	-5.62	0.839	16:29036613-16:31382470
ENSG00000099377	HSD3B7	Liver1	protein_coding	chr16	0.118633	3.5e-07	6.16	0.838	16:29036613-16:31382470
ENSG00000189157	FAM47E	Spleen1	protein_coding	chr4	0.353972	3.99e-23	-4.62	0.836	4:77130707-4:79093979
ENSG00000176681	LRRC37A	Brain_Frontal_Cortex_BA91	protein_coding	chr17	0.604939	1e-36	-9.25	0.832	17:43056905-17:45876022
ENSG00000136243	NUPL2	Brain_Amygdala1	protein_coding	chr7	0.158159	3.06e-06	4.86	0.831	7:22508611-7:23469560
ENSG00000163749	CCDC158	Small_Intestine_Terminal_Ileum1	protein_coding	chr4	0.051208	0.00267749	-4.67	0.83	4:77130707-4:79093979
ENSG00000152214	RIT2	Brain_Substantia_nigra1	protein_coding	chr18	0.0348901	0.0465986	4.6	0.825	18:39892648-18:42921854
ENSG00000243368	MCCC1-AS1	Colon_Transverse1	lncRNA	chr3	0.0238152	0.00299612	-4.19	0.821	3:181511166-3:183769683
ENSG00000136235	GPNMB	Colon_Sigmoid1	protein_coding	chr7	0.0588498	1.22e-05	4.74	0.812	7:22508611-7:23469560
ENSG00000243368	MCCC1-AS1	Brain_Frontal_Cortex_BA91	lncRNA	chr3	0.0536782	0.00203528	-3.88	0.805	3:181511166-3:183769683
ENSG00000170425	ADORA2B	Pancreas1	protein_coding	chr17	0.273369	8.47e-23	4.93	0.805	17:15020965-17:16411522
ENSG00000275263	AC135048.3	Brain_Spinal_cord_cervical_c-11	lncRNA	chr16	0.0347027	0.036749	5.7	0.803	16:29036613-16:31382470
ENSG00000196118	CCDC189	Brain_Putamen_basal_ganglia1	protein_coding	chr16	0.0438102	0.00615648	5.72	0.795	16:29036613-16:31382470
ENSG00000169242	EFNA1	Brain_Anterior_cingulate_cortex_BA241	protein_coding	chr1	0.0274835	0.0447772	4.55	0.794	1:154770403-1:156336133
ENSG00000237765	FAM200B	Brain_Hippocampus1	protein_coding	chr4	0.189142	5.31e-09	4.55	0.793	4:15147446-4:15926136
ENSG00000170425	ADORA2B	Brain_Frontal_Cortex_BA91	protein_coding	chr17	0.138936	3.78e-07	5.02	0.787	17:15020965-17:16411522
ENSG00000049167	ERCC8	Brain_Frontal_Cortex_BA91	protein_coding	chr5	0.0377613	0.00997092	-4.65	0.786	5:58524622-5:60935451
ENSG00000136243	NUPL2	Brain_Frontal_Cortex_BA91	protein_coding	chr7	0.393711	1.52e-20	4.89	0.785	7:22508611-7:23469560
ENSG00000099377	HSD3B7	Small_Intestine_Terminal_Ileum1	protein_coding	chr16	0.180163	5.32e-09	-5.82	0.784	16:29036613-16:31382470
ENSG00000214941	ZSWIM7	Brain_Caudate_basal_ganglia1	protein_coding	chr17	0.34516	2.17e-19	5.02	0.773	17:15020965-17:16411522
ENSG00000136243	NUPL2	Small_Intestine_Terminal_Ileum1	protein_coding	chr7	0.148018	1.59e-07	5.1	0.769	7:22508611-7:23469560
ENSG00000099381	SETD1A	Whole_Blood1	protein_coding	chr16	0.010315	0.00851872	-5.8	0.768	16:29036613-16:31382470
ENSG00000136243	NUPL2	Brain_Hippocampus1	protein_coding	chr7	0.348355	7.27e-17	4.91	0.762	7:22508611-7:23469560
ENSG00000169242	EFNA1	Pituitary1	protein_coding	chr1	0.0212234	0.024905	4.57	0.761	1:154770403-1:156336133
ENSG00000230658	KLHL7-DT	Brain_Anterior_cingulate_cortex_BA241	lncRNA	chr7	0.589979	7.27e-30	-5.14	0.76	7:22508611-7:23469560
ENSG00000136243	NUPL2	Pancreas1	protein_coding	chr7	0.0483793	0.000107471	5.12	0.759	7:22508611-7:23469560
ENSG00000078070	MCCC1	Brain_Frontal_Cortex_BA91	protein_coding	chr3	0.155814	6.46e-08	-0.604	0.758	3:181511166-3:183769683
ENSG00000189157	FAM47E	Brain_Cerebellar_Hemisphere1	protein_coding	chr4	0.401146	5.19e-21	-4.22	0.754	4:77130707-4:79093979
ENSG00000141027	NCOR1	Brain_Cortex1	protein_coding	chr17	0.0462269	0.00196243	5.38	0.751	17:15020965-17:16411522
ENSG00000189157	FAM47E	Brain_Cortex1	protein_coding	chr4	0.567839	7.71e-39	-4.08	0.741	4:77130707-4:79093979
ENSG00000243368	MCCC1-AS1	Brain_Nucleus_accumbens_basal_ganglia1	lncRNA	chr3	0.0622053	0.000344231	-3.87	0.72	3:181511166-3:183769683
ENSG00000152128	TMEM163	Liver1	protein_coding	chr2	0.102704	2.37e-06	4.46	0.719	2:135159453-2:137042794
ENSG00000136243	NUPL2	Brain_Caudate_basal_ganglia1	protein_coding	chr7	0.295426	2.63e-16	4.83	0.717	7:22508611-7:23469560
ENSG00000196118	CCDC189	Pancreas1	protein_coding	chr16	0.0745071	1.3e-06	5.68	0.712	16:29036613-16:31382470
ENSG00000078070	MCCC1	Colon_Transverse1	protein_coding	chr3	0.081432	2.52e-08	-0.508	0.697	3:181511166-3:183769683
ENSG00000227782	AC002553.1	Brain_Nucleus_accumbens_basal_ganglia1	lncRNA	chr17	0.0202091	0.0435729	5.38	0.695	17:15020965-17:16411522
ENSG00000230658	KLHL7-DT	Brain_Putamen_basal_ganglia1	lncRNA	chr7	0.499676	4.72e-27	-4.97	0.691	7:22508611-7:23469560
ENSG00000214941	ZSWIM7	Brain_Hippocampus1	protein_coding	chr17	0.117023	6.89e-06	5.39	0.69	17:15020965-17:16411522
ENSG00000230658	KLHL7-DT	Brain_Nucleus_accumbens_basal_ganglia1	lncRNA	chr7	0.567165	3.2e-38	-4.73	0.686	7:22508611-7:23469560
ENSG00000170425	ADORA2B	Small_Intestine_Terminal_Ileum1	protein_coding	chr17	0.113799	5.32e-06	5.02	0.684	17:15020965-17:16411522
ENSG00000080854	IGSF9B	Pituitary1	protein_coding	chr11	0.320641	1.7e-21	-4.39	0.659	11:133000260-11:134205993
ENSG00000078070	MCCC1	Brain_Nucleus_accumbens_basal_ganglia1	protein_coding	chr3	0.162661	2.66e-09	-0.644	0.656	3:181511166-3:183769683
ENSG00000230658	KLHL7-DT	Brain_Hypothalamus1	lncRNA	chr7	0.564206	4.08e-32	-4.73	0.652	7:22508611-7:23469560
ENSG00000141027	NCOR1	Brain_Amygdala1	protein_coding	chr17	0.0546965	0.00764112	5.22	0.651	17:15020965-17:16411522
ENSG00000080854	IGSF9B	Whole_Blood1	protein_coding	chr11	0.100727	3.82e-17	-4.38	0.646	11:133000260-11:134205993
ENSG00000275263	AC135048.3	Brain_Caudate_basal_ganglia1	lncRNA	chr16	0.0445218	0.00314452	5.91	0.645	16:29036613-16:31382470
ENSG00000133256	PDE6B	Brain_Substantia_nigra1	protein_coding	chr4	0.274367	2.23e-09	3.68	0.644	4:695146-4:1478711
ENSG00000214941	ZSWIM7	Brain_Hypothalamus1	protein_coding	chr17	0.301391	9.1e-15	5.08	0.634	17:15020965-17:16411522
ENSG00000099377	HSD3B7	Brain_Cortex1	protein_coding	chr16	0.0635946	0.000264581	-5.97	0.626	16:29036613-16:31382470
ENSG00000080854	IGSF9B	Spleen1	protein_coding	chr11	0.215084	1.66e-13	-4.36	0.623	11:133000260-11:134205993
ENSG00000011295	TTC19	Stomach1	protein_coding	chr17	0.207341	5.46e-18	-4.98	0.614	17:15020965-17:16411522
ENSG00000163479	SSR2	Liver1	protein_coding	chr1	0.030892	0.0111046	4.47	0.613	1:154770403-1:156336133
ENSG00000169242	EFNA1	Brain_Caudate_basal_ganglia1	protein_coding	chr1	0.143826	4.95e-08	4.34	0.606	1:154770403-1:156336133
ENSG00000169242	EFNA1	Brain_Amygdala1	protein_coding	chr1	0.0558726	0.00699908	4.34	0.605	1:154770403-1:156336133
ENSG00000169242	EFNA1	Brain_Frontal_Cortex_BA91	protein_coding	chr1	0.0312402	0.0192907	4.34	0.605	1:154770403-1:156336133
ENSG00000143590	EFNA3	Brain_Cortex1	protein_coding	chr1	0.0264934	0.0197109	-4.87	0.601	1:154770403-1:156336133
ENSG00000227782	AC002553.1	Brain_Putamen_basal_ganglia1	lncRNA	chr17	0.0358281	0.013431	5.38	0.598	17:15020965-17:16411522
ENSG00000189157	FAM47E	Brain_Substantia_nigra1	protein_coding	chr4	0.372821	5.47e-13	-4.37	0.598	4:77130707-4:79093979
ENSG00000049167	ERCC8	Spleen1	protein_coding	chr5	0.0865493	6.54e-06	4.93	0.593	5:58524622-5:60935451
ENSG00000108379	WNT3	Whole_Blood1	protein_coding	chr17	0.0196714	0.000270902	-9.32	0.592	17:43056905-17:45876022
ENSG00000120088	CRHR1	Colon_Sigmoid1	protein_coding	chr17	0.0353507	0.000752396	-9.71	0.586	17:43056905-17:45876022
ENSG00000260911	AC135050.3	Colon_Sigmoid1	lncRNA	chr16	0.186037	7.7e-16	-5.7	0.585	16:29036613-16:31382470
ENSG00000176681	LRRC37A	Brain_Cortex1	protein_coding	chr17	0.664468	4.98e-50	-9.52	0.58	17:43056905-17:45876022
ENSG00000108379	WNT3	Pituitary1	protein_coding	chr17	0.274369	4.23e-18	-9.27	0.579	17:43056905-17:45876022
ENSG00000103549	RNF40	Spleen1	protein_coding	chr16	0.0683224	6.72e-05	5.48	0.563	16:29036613-16:31382470
ENSG00000225342	AC079630.1	Whole_Blood1	lncRNA	chr12	0.0491463	6.64e-09	-3.64	0.562	12:39227446-12:40816185
ENSG00000136243	NUPL2	Spleen1	protein_coding	chr7	0.361777	1.01e-23	4.77	0.546	7:22508611-7:23469560
ENSG00000214941	ZSWIM7	Spleen1	protein_coding	chr17	0.51671	2.19e-37	-5.08	0.544	17:15020965-17:16411522
ENSG00000108379	WNT3	Stomach1	protein_coding	chr17	0.14381	1.6e-12	-9.37	0.542	17:43056905-17:45876022
ENSG00000169242	EFNA1	Brain_Nucleus_accumbens_basal_ganglia1	protein_coding	chr1	0.0798245	4.62e-05	4.28	0.539	1:154770403-1:156336133
ENSG00000011295	TTC19	Brain_Spinal_cord_cervical_c-11	protein_coding	chr17	0.147137	9.27e-06	-5.06	0.521	17:15020965-17:16411522
ENSG00000260943	LINC02555	Whole_Blood1	lncRNA	chr12	0.338921	4.87e-62	0.943	0.516	12:39227446-12:40816185
ENSG00000279685	MAPT-IT1	Brain_Hippocampus1	lncRNA	chr17	0.0435454	0.00714982	-9.38	0.511	17:43056905-17:45876022
ENSG00000170425	ADORA2B	Liver1	protein_coding	chr17	0.27011	8.69e-16	4.99	0.51	17:15020965-17:16411522
ENSG00000189157	FAM47E	Brain_Frontal_Cortex_BA91	protein_coding	chr4	0.459421	6.93e-25	-3.5	0.509	4:77130707-4:79093979
ENSG00000136235	GPNMB	Liver1	protein_coding	chr7	0.0843588	2.08e-05	5.21	0.508	7:22508611-7:23469560
ENSG00000275263	AC135048.3	Brain_Hypothalamus1	lncRNA	chr16	0.0643817	0.000841692	5.82	0.502	16:29036613-16:31382470
ENSG00000108379	WNT3	Small_Intestine_Terminal_Ileum1	protein_coding	chr17	0.0999378	2.14e-05	-9.33	0.501	17:43056905-17:45876022
ENSG00000224043	CCNT2-AS1	Spleen1	lncRNA	chr2	0.0542451	0.000402419	-4.24	0.501	2:135159453-2:137042794
ENSG00000275263	AC135048.3	Stomach1	lncRNA	chr16	0.060808	7.09e-06	5.9	0.501	16:29036613-16:31382470
ENSG00000011295	TTC19	Brain_Anterior_cingulate_cortex_BA241	protein_coding	chr17	0.0345221	0.0242499	-5.14	0.493	17:15020965-17:16411522
ENSG00000224043	CCNT2-AS1	Brain_Cortex1	lncRNA	chr2	0.0297737	0.01336	-3.87	0.489	2:135159453-2:137042794
ENSG00000136243	NUPL2	Brain_Cerebellar_Hemisphere1	protein_coding	chr7	0.484457	1.12e-26	4.82	0.487	7:22508611-7:23469560
ENSG00000196118	CCDC189	Stomach1	protein_coding	chr16	0.0219184	0.0076009	5.9	0.481	16:29036613-16:31382470
ENSG00000214401	KANSL1-AS1	Pancreas1	lncRNA	chr17	0.492137	1.71e-46	-9.26	0.48	17:43056905-17:45876022
ENSG00000243368	MCCC1-AS1	Pituitary1	lncRNA	chr3	0.0732946	2.39e-05	-3.6	0.479	3:181511166-3:183769683
ENSG00000230658	KLHL7-DT	Brain_Cerebellar_Hemisphere1	lncRNA	chr7	0.464178	3.21e-25	-4.82	0.476	7:22508611-7:23469560
ENSG00000127415	IDUA	Brain_Substantia_nigra1	protein_coding	chr4	0.0523153	0.0143753	-5.81	0.476	4:695146-4:1478711
ENSG00000136243	NUPL2	Stomach1	protein_coding	chr7	0.128353	3.02e-11	4.83	0.476	7:22508611-7:23469560
ENSG00000141027	NCOR1	Liver1	protein_coding	chr17	0.0321754	0.00952942	4.97	0.469	17:15020965-17:16411522
ENSG00000170425	ADORA2B	Brain_Spinal_cord_cervical_c-11	protein_coding	chr17	0.229373	1.4e-08	5.04	0.467	17:15020965-17:16411522
ENSG00000139722	VPS37B	Pancreas1	protein_coding	chr12	0.0690075	3.31e-06	-4.21	0.466	12:122009763-12:124976982
ENSG00000049167	ERCC8	Whole_Blood1	protein_coding	chr5	0.0738793	8.21e-13	4.2	0.462	5:58524622-5:60935451
ENSG00000262372	CR936218.1	Stomach1	lncRNA	chr17	0.0393978	0.000324616	9.34	0.458	17:43056905-17:45876022
ENSG00000243368	MCCC1-AS1	Colon_Sigmoid1	lncRNA	chr3	0.0260831	0.00388139	-4.19	0.448	3:181511166-3:183769683
ENSG00000176681	LRRC37A	Brain_Hypothalamus1	protein_coding	chr17	0.64602	9.92e-40	-9.33	0.446	17:43056905-17:45876022
ENSG00000169242	EFNA1	Brain_Hippocampus1	protein_coding	chr1	0.0825491	0.000182737	4.34	0.442	1:154770403-1:156336133
ENSG00000080854	IGSF9B	Colon_Transverse1	protein_coding	chr11	0.127015	1.84e-12	-4.21	0.442	11:133000260-11:134205993
ENSG00000156928	MALSU1	Liver1	protein_coding	chr7	0.0490631	0.00130296	5.18	0.44	7:22508611-7:23469560
ENSG00000196118	CCDC189	Brain_Anterior_cingulate_cortex_BA241	protein_coding	chr16	0.0914856	0.000196479	5.72	0.436	16:29036613-16:31382470
ENSG00000169241	SLC50A1	Liver1	protein_coding	chr1	0.0202344	0.040404	-4.34	0.435	1:154770403-1:156336133
ENSG00000058063	ATP11B	Pituitary1	protein_coding	chr3	0.044439	0.00109495	-0.718	0.434	3:181511166-3:183769683
ENSG00000214401	KANSL1-AS1	Brain_Putamen_basal_ganglia1	lncRNA	chr17	0.608355	4.99e-36	-9.44	0.433	17:43056905-17:45876022
ENSG00000272308	AC104113.1	Colon_Sigmoid1	lncRNA	chr5	0.0317573	0.00141815	4.16	0.428	5:58524622-5:60935451
ENSG00000243368	MCCC1-AS1	Brain_Spinal_cord_cervical_c-11	lncRNA	chr3	0.0319093	0.0453623	-4.16	0.425	3:181511166-3:183769683
ENSG00000004468	CD38	Brain_Cerebellum1	protein_coding	chr4	0.0881209	1.27e-05	-4.05	0.423	4:15147446-4:15926136
ENSG00000188906	LRRK2	Small_Intestine_Terminal_Ileum1	protein_coding	chr12	0.0484186	0.00352871	4.16	0.419	12:39227446-12:40816185
ENSG00000237765	FAM200B	Stomach1	protein_coding	chr4	0.0474858	7.66e-05	4.16	0.419	4:15147446-4:15926136
ENSG00000279685	MAPT-IT1	Brain_Cerebellum1	lncRNA	chr17	0.135548	4.15e-08	-9.61	0.416	17:43056905-17:45876022
ENSG00000214401	KANSL1-AS1	Brain_Anterior_cingulate_cortex_BA241	lncRNA	chr17	0.585371	1.64e-29	-9.24	0.415	17:43056905-17:45876022
ENSG00000227782	AC002553.1	Brain_Cerebellar_Hemisphere1	lncRNA	chr17	0.0815405	0.000127879	5.1	0.415	17:15020965-17:16411522
ENSG00000279685	MAPT-IT1	Colon_Sigmoid1	lncRNA	chr17	0.0166775	0.0212505	-9.67	0.411	17:43056905-17:45876022
ENSG00000275263	AC135048.3	Brain_Anterior_cingulate_cortex_BA241	lncRNA	chr16	0.0470602	0.00830938	5.7	0.391	16:29036613-16:31382470
ENSG00000237765	FAM200B	Brain_Cerebellum1	protein_coding	chr4	0.225386	3.81e-13	4.01	0.382	4:15147446-4:15926136
ENSG00000080854	IGSF9B	Brain_Cortex1	protein_coding	chr11	0.0757393	6.51e-05	-4.12	0.381	11:133000260-11:134205993
ENSG00000272308	AC104113.1	Spleen1	lncRNA	chr5	0.0447602	0.00134435	4.83	0.38	5:58524622-5:60935451
ENSG00000143537	ADAM15	Brain_Hippocampus1	protein_coding	chr1	0.16045	9.76e-08	-4.29	0.376	1:154770403-1:156336133
ENSG00000230658	KLHL7-DT	Spleen1	lncRNA	chr7	0.628548	2.75e-50	-4.69	0.376	7:22508611-7:23469560
ENSG00000080854	IGSF9B	Stomach1	protein_coding	chr11	0.0650298	3.33e-06	-4.11	0.371	11:133000260-11:134205993
ENSG00000189157	FAM47E	Brain_Nucleus_accumbens_basal_ganglia1	protein_coding	chr4	0.420676	1.69e-25	-3.56	0.369	4:77130707-4:79093979
ENSG00000189157	FAM47E	Colon_Transverse1	protein_coding	chr4	0.357064	5.45e-37	-4.16	0.367	4:77130707-4:79093979
ENSG00000169242	EFNA1	Brain_Cortex1	protein_coding	chr1	0.0567256	0.000584159	4.76	0.365	1:154770403-1:156336133
ENSG00000049167	ERCC8	Brain_Spinal_cord_cervical_c-11	protein_coding	chr5	0.0610731	0.00527427	-4.1	0.364	5:58524622-5:60935451
ENSG00000170425	ADORA2B	Spleen1	protein_coding	chr17	0.40469	3.78e-27	5	0.362	17:15020965-17:16411522
ENSG00000170425	ADORA2B	Stomach1	protein_coding	chr17	0.395821	4.12e-37	4.87	0.362	17:15020965-17:16411522
ENSG00000133256	PDE6B	Brain_Frontal_Cortex_BA91	protein_coding	chr4	0.0783005	0.000176571	2.73	0.358	4:695146-4:1478711
ENSG00000103496	STX4	Spleen1	protein_coding	chr16	0.16159	3.17e-10	-5.39	0.349	16:29036613-16:31382470
ENSG00000127419	TMEM175	Brain_Cerebellum1	protein_coding	chr4	0.213324	1.93e-12	-6.99	0.347	4:695146-4:1478711
ENSG00000185294	SPPL2C	Brain_Cortex1	protein_coding	chr17	0.0675875	0.000166907	-9.47	0.347	17:43056905-17:45876022
ENSG00000279685	MAPT-IT1	Brain_Putamen_basal_ganglia1	lncRNA	chr17	0.0508587	0.0031075	-9.41	0.345	17:43056905-17:45876022
ENSG00000011295	TTC19	Brain_Amygdala1	protein_coding	chr17	0.144122	9.12e-06	-5.08	0.33	17:15020965-17:16411522
ENSG00000185294	SPPL2C	Brain_Cerebellum1	protein_coding	chr17	0.37745	4.45e-23	-9.58	0.317	17:43056905-17:45876022
ENSG00000133256	PDE6B	Brain_Hippocampus1	protein_coding	chr4	0.049921	0.0039172	2.73	0.315	4:695146-4:1478711
ENSG00000159314	ARHGAP27	Brain_Nucleus_accumbens_basal_ganglia1	protein_coding	chr17	0.256865	1.4e-14	-9.29	0.31	17:43056905-17:45876022
ENSG00000237765	FAM200B	Brain_Substantia_nigra1	protein_coding	chr4	0.10743	0.000371043	4.04	0.307	4:15147446-4:15926136
ENSG00000170425	ADORA2B	Brain_Cerebellar_Hemisphere1	protein_coding	chr17	0.271992	1.36e-13	5.03	0.304	17:15020965-17:16411522
ENSG00000164182	NDUFAF2	Brain_Caudate_basal_ganglia1	protein_coding	chr5	0.0915523	1.8e-05	4.03	0.302	5:58524622-5:60935451
ENSG00000185294	SPPL2C	Brain_Cerebellar_Hemisphere1	protein_coding	chr17	0.368775	5.14e-19	-9.65	0.302	17:43056905-17:45876022
ENSG00000136235	GPNMB	Stomach1	protein_coding	chr7	0.0668104	2.42e-06	4.73	0.296	7:22508611-7:23469560
ENSG00000176681	LRRC37A	Brain_Anterior_cingulate_cortex_BA241	protein_coding	chr17	0.610701	1.66e-31	-9.2	0.293	17:43056905-17:45876022
ENSG00000228696	ARL17B	Brain_Anterior_cingulate_cortex_BA241	protein_coding	chr17	0.415774	1.21e-18	-9.2	0.293	17:43056905-17:45876022
ENSG00000214941	ZSWIM7	Small_Intestine_Terminal_Ileum1	protein_coding	chr17	0.314321	8.63e-16	-4.84	0.293	17:15020965-17:16411522
ENSG00000228696	ARL17B	Pancreas1	protein_coding	chr17	0.378839	3.47e-33	-9.2	0.289	17:43056905-17:45876022
ENSG00000136243	NUPL2	Brain_Putamen_basal_ganglia1	protein_coding	chr7	0.243198	8.37e-12	4.78	0.285	7:22508611-7:23469560
ENSG00000196735	HLA-DQA1	Pituitary1	protein_coding	chr6	0.286985	5.27e-19	-4	0.279	6:31571337-6:32682664
ENSG00000214401	KANSL1-AS1	Whole_Blood1	lncRNA	chr17	0.655289	1.23e-156	-9.24	0.279	17:43056905-17:45876022
ENSG00000196118	CCDC189	Brain_Hypothalamus1	protein_coding	chr16	0.13932	5.36e-07	5.71	0.278	16:29036613-16:31382470
ENSG00000011295	TTC19	Brain_Cerebellar_Hemisphere1	protein_coding	chr17	0.0460537	0.00434632	-5.01	0.274	17:15020965-17:16411522
ENSG00000136243	NUPL2	Brain_Hypothalamus1	protein_coding	chr7	0.325135	4.8e-16	4.54	0.273	7:22508611-7:23469560
ENSG00000184445	KNTC1	Stomach1	protein_coding	chr12	0.0245174	0.0047281	-3.98	0.269	12:122009763-12:124976982
ENSG00000275413	AC002553.2	Brain_Anterior_cingulate_cortex_BA241	lncRNA	chr17	0.0371628	0.0193185	-5.01	0.268	17:15020965-17:16411522
ENSG00000184445	KNTC1	Liver1	protein_coding	chr12	0.0199466	0.0418689	-3.98	0.264	12:122009763-12:124976982
ENSG00000127415	IDUA	Colon_Transverse1	protein_coding	chr4	0.274327	2.59e-27	-5.88	0.259	4:695146-4:1478711
ENSG00000237765	FAM200B	Brain_Spinal_cord_cervical_c-11	protein_coding	chr4	0.13907	1.7e-05	3.97	0.258	4:15147446-4:15926136
ENSG00000163749	CCDC158	Brain_Hippocampus1	protein_coding	chr4	0.117326	6.69e-06	-3.94	0.252	4:77130707-4:79093979
ENSG00000238083	LRRC37A2	Brain_Hypothalamus1	protein_coding	chr17	0.676612	4.89e-43	-9.27	0.25	17:43056905-17:45876022
ENSG00000184922	FMNL1	Brain_Cerebellar_Hemisphere1	protein_coding	chr17	0.364383	9.41e-19	9.63	0.248	17:43056905-17:45876022
ENSG00000184922	FMNL1	Brain_Cerebellum1	protein_coding	chr17	0.344783	9.26e-21	9.55	0.244	17:43056905-17:45876022
ENSG00000156873	PHKG2	Colon_Sigmoid1	protein_coding	chr16	0.0231041	0.00661399	5.54	0.241	16:29036613-16:31382470
ENSG00000224043	CCNT2-AS1	Colon_Transverse1	lncRNA	chr2	0.038716	0.000145313	-3.95	0.238	2:135159453-2:137042794
ENSG00000214401	KANSL1-AS1	Brain_Nucleus_accumbens_basal_ganglia1	lncRNA	chr17	0.598046	1.9e-41	-9.27	0.236	17:43056905-17:45876022
ENSG00000184445	KNTC1	Brain_Cortex1	protein_coding	chr12	0.0624303	0.000302603	-3.94	0.232	12:122009763-12:124976982
ENSG00000136243	NUPL2	Brain_Anterior_cingulate_cortex_BA241	protein_coding	chr7	0.340283	8.96e-15	4.9	0.228	7:22508611-7:23469560
ENSG00000163749	CCDC158	Liver1	protein_coding	chr4	0.0500492	0.00116091	-3.94	0.225	4:77130707-4:79093979
ENSG00000145335	SNCA	Whole_Blood1	protein_coding	chr4	0.0375126	4.37e-07	-3.94	0.223	4:90231746-4:91560677
ENSG00000226816	AC005082.1	Brain_Nucleus_accumbens_basal_ganglia1	lncRNA	chr7	0.20201	1.95e-11	-4.44	0.219	7:22508611-7:23469560
ENSG00000228696	ARL17B	Pituitary1	protein_coding	chr17	0.479395	3.66e-35	-9.17	0.219	17:43056905-17:45876022
ENSG00000176681	LRRC37A	Pituitary1	protein_coding	chr17	0.674293	3.61e-59	-9.17	0.219	17:43056905-17:45876022
ENSG00000230658	KLHL7-DT	Brain_Caudate_basal_ganglia1	lncRNA	chr7	0.583132	2.48e-38	-4.57	0.218	7:22508611-7:23469560
ENSG00000188906	LRRK2	Colon_Sigmoid1	protein_coding	chr12	0.111191	1.07e-09	3.92	0.218	12:39227446-12:40816185
ENSG00000274678	AC106886.3	Brain_Cortex1	lncRNA	chr16	0.0291125	0.0144456	-5.78	0.217	16:29036613-16:31382470
ENSG00000103496	STX4	Brain_Nucleus_accumbens_basal_ganglia1	protein_coding	chr16	0.183587	2e-10	5.42	0.211	16:29036613-16:31382470
ENSG00000080603	SRCAP	Brain_Nucleus_accumbens_basal_ganglia1	protein_coding	chr16	0.0294476	0.0146085	-5.42	0.21	16:29036613-16:31382470
ENSG00000189157	FAM47E	Brain_Spinal_cord_cervical_c-11	protein_coding	chr4	0.496957	3.18e-20	-4.06	0.208	4:77130707-4:79093979
ENSG00000011295	TTC19	Brain_Putamen_basal_ganglia1	protein_coding	chr17	0.214993	1.92e-10	-5.18	0.207	17:15020965-17:16411522
ENSG00000214401	KANSL1-AS1	Small_Intestine_Terminal_Ileum1	lncRNA	chr17	0.569897	2.46e-33	-9.23	0.206	17:43056905-17:45876022
ENSG00000141027	NCOR1	Brain_Caudate_basal_ganglia1	protein_coding	chr17	0.0322784	0.0121878	4.74	0.204	17:15020965-17:16411522
ENSG00000158715	SLC45A3	Brain_Hippocampus1	protein_coding	chr1	0.0538684	0.00270219	-1.51	0.202	1:204681068-1:205922403
ENSG00000230658	KLHL7-DT	Brain_Hippocampus1	lncRNA	chr7	0.668511	6.3e-41	-4.63	0.202	7:22508611-7:23469560
ENSG00000136448	NMT1	Brain_Cerebellar_Hemisphere1	protein_coding	chr17	0.132824	7.11e-07	9.6	0.197	17:43056905-17:45876022
ENSG00000011295	TTC19	Brain_Hypothalamus1	protein_coding	chr17	0.0594816	0.00135066	-4.83	0.195	17:15020965-17:16411522
ENSG00000103496	STX4	Brain_Putamen_basal_ganglia1	protein_coding	chr16	0.0522179	0.00272458	5.46	0.195	16:29036613-16:31382470
ENSG00000196118	CCDC189	Brain_Nucleus_accumbens_basal_ganglia1	protein_coding	chr16	0.334241	2.07e-19	5.4	0.19	16:29036613-16:31382470
ENSG00000214941	ZSWIM7	Brain_Frontal_Cortex_BA91	protein_coding	chr17	0.38576	4.75e-20	4.71	0.189	17:15020965-17:16411522
ENSG00000224043	CCNT2-AS1	Brain_Frontal_Cortex_BA91	lncRNA	chr2	0.0235411	0.0426442	-3.87	0.189	2:135159453-2:137042794
ENSG00000189157	FAM47E	Colon_Sigmoid1	protein_coding	chr4	0.352505	1.12e-31	-3.92	0.189	4:77130707-4:79093979
ENSG00000108379	WNT3	Brain_Putamen_basal_ganglia1	protein_coding	chr17	0.226228	5.58e-11	-9.33	0.186	17:43056905-17:45876022
ENSG00000122550	KLHL7	Small_Intestine_Terminal_Ileum1	protein_coding	chr7	0.0614482	0.000974044	-4.81	0.186	7:22508611-7:23469560
ENSG00000127419	TMEM175	Brain_Hippocampus1	protein_coding	chr4	0.0611415	0.00136506	-6.46	0.185	4:695146-4:1478711
ENSG00000103549	RNF40	Brain_Nucleus_accumbens_basal_ganglia1	protein_coding	chr16	0.154774	6.95e-09	-5.37	0.185	16:29036613-16:31382470
ENSG00000230658	KLHL7-DT	Stomach1	lncRNA	chr7	0.482859	4.96e-48	-4.61	0.18	7:22508611-7:23469560
ENSG00000141027	NCOR1	Brain_Hypothalamus1	protein_coding	chr17	0.0307266	0.0222324	4.81	0.179	17:15020965-17:16411522
ENSG00000151502	VPS26B	Colon_Transverse1	protein_coding	chr11	0.0245324	0.00258637	3.92	0.176	11:133000260-11:134205993
ENSG00000279685	MAPT-IT1	Brain_Nucleus_accumbens_basal_ganglia1	lncRNA	chr17	0.0517345	0.00113226	-9.23	0.174	17:43056905-17:45876022
ENSG00000230658	KLHL7-DT	Brain_Frontal_Cortex_BA91	lncRNA	chr7	0.580003	2.04e-34	-4.56	0.173	7:22508611-7:23469560
ENSG00000238083	LRRC37A2	Pancreas1	protein_coding	chr17	0.427262	1.49e-38	-9.14	0.171	17:43056905-17:45876022
ENSG00000189157	FAM47E	Pituitary1	protein_coding	chr4	0.618766	4.07e-51	-3.88	0.171	4:77130707-4:79093979
ENSG00000264589	MAPT-AS1	Brain_Hippocampus1	lncRNA	chr17	0.136464	1.05e-06	9.26	0.167	17:43056905-17:45876022
ENSG00000184445	KNTC1	Brain_Anterior_cingulate_cortex_BA241	protein_coding	chr12	0.0929518	0.000173541	-3.83	0.165	12:122009763-12:124976982
ENSG00000247775	SNCA-AS1	Brain_Anterior_cingulate_cortex_BA241	lncRNA	chr4	0.125954	1.03e-05	1.17	0.165	4:90231746-4:91560677
ENSG00000196118	CCDC189	Brain_Caudate_basal_ganglia1	protein_coding	chr16	0.182368	5.31e-10	5.66	0.164	16:29036613-16:31382470
ENSG00000196126	HLA-DRB1	Brain_Cerebellum1	protein_coding	chr6	0.442385	4.61e-28	3.78	0.164	6:31571337-6:32682664
ENSG00000228696	ARL17B	Brain_Frontal_Cortex_BA91	protein_coding	chr17	0.472909	7.68e-26	-9.07	0.162	17:43056905-17:45876022
ENSG00000080854	IGSF9B	Colon_Sigmoid1	protein_coding	chr11	0.17259	1.06e-14	-3.82	0.162	11:133000260-11:134205993
ENSG00000228696	ARL17B	Small_Intestine_Terminal_Ileum1	protein_coding	chr17	0.337977	4.07e-17	-9.2	0.162	17:43056905-17:45876022
ENSG00000176681	LRRC37A	Small_Intestine_Terminal_Ileum1	protein_coding	chr17	0.507197	3.15e-28	-9.2	0.162	17:43056905-17:45876022
ENSG00000184445	KNTC1	Brain_Nucleus_accumbens_basal_ganglia1	protein_coding	chr12	0.063362	0.000301803	-3.82	0.16	12:122009763-12:124976982
ENSG00000184445	KNTC1	Brain_Frontal_Cortex_BA91	protein_coding	chr12	0.108992	8.13e-06	-3.81	0.159	12:122009763-12:124976982
ENSG00000214941	ZSWIM7	Pancreas1	protein_coding	chr17	0.102595	1.05e-08	4.58	0.158	17:15020965-17:16411522
ENSG00000214941	ZSWIM7	Brain_Anterior_cingulate_cortex_BA241	protein_coding	chr17	0.544613	1.52e-26	4.9	0.157	17:15020965-17:16411522
ENSG00000011295	TTC19	Brain_Hippocampus1	protein_coding	chr17	0.111122	1.21e-05	-5.1	0.157	17:15020965-17:16411522
ENSG00000167395	ZNF646	Brain_Spinal_cord_cervical_c-11	protein_coding	chr16	0.0410608	0.0228723	-5.39	0.157	16:29036613-16:31382470
ENSG00000103496	STX4	Pancreas1	protein_coding	chr16	0.0227463	0.00833397	-5.39	0.154	16:29036613-16:31382470
ENSG00000168291	PDHB	Stomach1	protein_coding	chr3	0.16785	1.52e-14	3.84	0.151	3:58157850-3:60272829
ENSG00000141027	NCOR1	Brain_Hippocampus1	protein_coding	chr17	0.0564679	0.0021167	5.1	0.15	17:15020965-17:16411522
ENSG00000184445	KNTC1	Colon_Sigmoid1	protein_coding	chr12	0.038242	0.000452428	-3.79	0.15	12:122009763-12:124976982
ENSG00000176681	LRRC37A	Whole_Blood1	protein_coding	chr17	0.314815	7.92e-57	-9.17	0.149	17:43056905-17:45876022
ENSG00000264589	MAPT-AS1	Brain_Hypothalamus1	lncRNA	chr17	0.282767	8.55e-14	9.21	0.148	17:43056905-17:45876022
ENSG00000163749	CCDC158	Pituitary1	protein_coding	chr4	0.310012	1.07e-20	-3.84	0.148	4:77130707-4:79093979
ENSG00000189157	FAM47E	Brain_Putamen_basal_ganglia1	protein_coding	chr4	0.500224	4.3e-27	-3.14	0.143	4:77130707-4:79093979
ENSG00000188906	LRRK2	Spleen1	protein_coding	chr12	0.0365048	0.00385959	3.78	0.143	12:39227446-12:40816185
ENSG00000279685	MAPT-IT1	Brain_Cerebellar_Hemisphere1	lncRNA	chr17	0.0509754	0.00266246	-9.57	0.141	17:43056905-17:45876022
ENSG00000260911	AC135050.3	Brain_Nucleus_accumbens_basal_ganglia1	lncRNA	chr16	0.0668861	0.000202124	-5.35	0.141	16:29036613-16:31382470
ENSG00000184445	KNTC1	Brain_Substantia_nigra1	protein_coding	chr12	0.090427	0.00115034	-3.79	0.137	12:122009763-12:124976982
ENSG00000176681	LRRC37A	Brain_Nucleus_accumbens_basal_ganglia1	protein_coding	chr17	0.642156	1.64e-46	-9.2	0.132	17:43056905-17:45876022
ENSG00000099377	HSD3B7	Brain_Hypothalamus1	protein_coding	chr16	0.103941	1.81e-05	-5.57	0.131	16:29036613-16:31382470
ENSG00000167395	ZNF646	Colon_Sigmoid1	protein_coding	chr16	0.0170643	0.0197908	-5.42	0.131	16:29036613-16:31382470
ENSG00000184445	KNTC1	Pituitary1	protein_coding	chr12	0.0454493	0.000957622	-3.74	0.129	12:122009763-12:124976982
ENSG00000156873	PHKG2	Pancreas1	protein_coding	chr16	0.0449043	0.000192996	5.36	0.128	16:29036613-16:31382470
ENSG00000189157	FAM47E	Brain_Caudate_basal_ganglia1	protein_coding	chr4	0.443299	3.26e-26	-3.73	0.122	4:77130707-4:79093979
ENSG00000107651	SEC23IP	Brain_Spinal_cord_cervical_c-11	protein_coding	chr10	0.0933375	0.000503774	3.73	0.122	10:120591693-10:122407323
ENSG00000011295	TTC19	Whole_Blood1	protein_coding	chr17	0.171984	3.12e-29	-4.98	0.122	17:15020965-17:16411522
ENSG00000139726	DENR	Colon_Transverse1	protein_coding	chr12	0.0236221	0.00311728	-3.73	0.121	12:122009763-12:124976982
ENSG00000167394	ZNF668	Whole_Blood1	protein_coding	chr16	0.115178	1.6e-19	5.46	0.121	16:29036613-16:31382470
ENSG00000170425	ADORA2B	Brain_Cortex1	protein_coding	chr17	0.133002	7.62e-08	5.02	0.12	17:15020965-17:16411522
ENSG00000170425	ADORA2B	Brain_Nucleus_accumbens_basal_ganglia1	protein_coding	chr17	0.116062	7.01e-07	5.04	0.12	17:15020965-17:16411522
ENSG00000099377	HSD3B7	Brain_Caudate_basal_ganglia1	protein_coding	chr16	0.0576822	0.000743306	-5.57	0.116	16:29036613-16:31382470
ENSG00000230658	KLHL7-DT	Brain_Amygdala1	lncRNA	chr7	0.494811	1.47e-20	-4.42	0.114	7:22508611-7:23469560
ENSG00000138750	NUP54	Brain_Hypothalamus1	protein_coding	chr4	0.145092	2.99e-07	-4.47	0.113	4:77130707-4:79093979
ENSG00000230658	KLHL7-DT	Pancreas1	lncRNA	chr7	0.577989	1.04e-58	-4.72	0.112	7:22508611-7:23469560
ENSG00000099377	HSD3B7	Brain_Cerebellar_Hemisphere1	protein_coding	chr16	0.0255071	0.0347561	-5.99	0.111	16:29036613-16:31382470
ENSG00000214941	ZSWIM7	Brain_Nucleus_accumbens_basal_ganglia1	protein_coding	chr17	0.350138	1.81e-20	5.02	0.11	17:15020965-17:16411522
ENSG00000227782	AC002553.1	Brain_Cerebellum1	lncRNA	chr17	0.0581328	0.000436832	4.55	0.109	17:15020965-17:16411522
ENSG00000122550	KLHL7	Pancreas1	protein_coding	chr7	0.0729084	1.71e-06	-4.71	0.109	7:22508611-7:23469560
ENSG00000127415	IDUA	Colon_Sigmoid1	protein_coding	chr4	0.251711	1.12e-21	-6.54	0.108	4:695146-4:1478711
ENSG00000176681	LRRC37A	Stomach1	protein_coding	chr17	0.453524	3.69e-44	-9.2	0.107	17:43056905-17:45876022
ENSG00000235560	AC002310.1	Brain_Frontal_Cortex_BA91	lncRNA	chr16	0.115033	4.4e-06	-3.17	0.106	16:29036613-16:31382470
ENSG00000235560	AC002310.1	Small_Intestine_Terminal_Ileum1	lncRNA	chr16	0.0958162	3.24e-05	-2.11	0.105	16:29036613-16:31382470
ENSG00000152128	TMEM163	Stomach1	protein_coding	chr2	0.0720262	9.47e-07	3.69	0.105	2:135159453-2:137042794
ENSG00000144224	UBXN4	Brain_Substantia_nigra1	protein_coding	chr2	0.0434257	0.0260851	-3.68	0.104	2:135159453-2:137042794
ENSG00000168306	ACOX2	Colon_Transverse1	protein_coding	chr3	0.0612644	1.53e-06	-3.69	0.103	3:58157850-3:60272829
ENSG00000238083	LRRC37A2	Brain_Hippocampus1	protein_coding	chr17	0.617229	8.09e-36	-9.2	0.102	17:43056905-17:45876022
ENSG00000150967	ABCB9	Brain_Substantia_nigra1	protein_coding	chr12	0.0724109	0.00379085	-3.71	0.101	12:122009763-12:124976982
ENSG00000228696	ARL17B	Brain_Nucleus_accumbens_basal_ganglia1	protein_coding	chr17	0.515113	2.86e-33	-9.17	0.0985	17:43056905-17:45876022
ENSG00000221988	PPT2	Brain_Cerebellum1	protein_coding	chr6	0.0801104	3.29e-05	-3.29	0.0981	6:31571337-6:32682664
ENSG00000163749	CCDC158	Brain_Substantia_nigra1	protein_coding	chr4	0.110154	0.000309245	-3.85	0.098	4:77130707-4:79093979
ENSG00000163749	CCDC158	Colon_Transverse1	protein_coding	chr4	0.149914	1.31e-14	-3.81	0.0973	4:77130707-4:79093979
ENSG00000133256	PDE6B	Brain_Amygdala1	protein_coding	chr4	0.0759657	0.00156999	2.73	0.0971	4:695146-4:1478711
ENSG00000120088	CRHR1	Brain_Hippocampus1	protein_coding	chr17	0.0564919	0.00211194	9.19	0.095	17:43056905-17:45876022
ENSG00000167395	ZNF646	Colon_Transverse1	protein_coding	chr16	0.0659718	5.9e-07	-5.2	0.0942	16:29036613-16:31382470
ENSG00000170425	ADORA2B	Brain_Putamen_basal_ganglia1	protein_coding	chr17	0.0520054	0.00278117	5.01	0.0934	17:15020965-17:16411522
ENSG00000196118	CCDC189	Brain_Cortex1	protein_coding	chr16	0.216613	2.05e-12	5.63	0.0923	16:29036613-16:31382470
ENSG00000249252	AC098829.1	Whole_Blood1	lncRNA	chr4	0.0111278	0.00627552	3.65	0.0913	4:15147446-4:15926136
ENSG00000152127	MGAT5	Colon_Sigmoid1	protein_coding	chr2	0.0504919	5.28e-05	3.64	0.0899	2:135159453-2:137042794
ENSG00000183715	OPCML	Brain_Nucleus_accumbens_basal_ganglia1	protein_coding	chr11	0.0506221	0.00128507	3.63	0.0893	11:133000260-11:134205993
ENSG00000133256	PDE6B	Brain_Cortex1	protein_coding	chr4	0.0724465	9.52e-05	2.42	0.089	4:695146-4:1478711
ENSG00000049167	ERCC8	Brain_Hypothalamus1	protein_coding	chr5	0.0782796	0.000219794	-3.62	0.0868	5:58524622-5:60935451
ENSG00000230658	KLHL7-DT	Pituitary1	lncRNA	chr7	0.616595	7.94e-51	-4.49	0.0863	7:22508611-7:23469560
ENSG00000227782	AC002553.1	Colon_Sigmoid1	lncRNA	chr17	0.0140932	0.0343327	4.52	0.0847	17:15020965-17:16411522
ENSG00000103496	STX4	Whole_Blood1	protein_coding	chr16	0.0119512	0.00461244	-5.39	0.0835	16:29036613-16:31382470
ENSG00000272308	AC104113.1	Brain_Frontal_Cortex_BA91	lncRNA	chr5	0.0357974	0.0121532	-4.12	0.0827	5:58524622-5:60935451
ENSG00000099381	SETD1A	Liver1	protein_coding	chr16	0.0235688	0.0268348	-5.76	0.0818	16:29036613-16:31382470
ENSG00000272182	AC135507.1	Colon_Transverse1	lncRNA	chr3	0.0119082	0.0363931	-3.64	0.0803	3:58157850-3:60272829
ENSG00000103496	STX4	Brain_Anterior_cingulate_cortex_BA241	protein_coding	chr16	0.151061	1.15e-06	5.39	0.0799	16:29036613-16:31382470
ENSG00000080854	IGSF9B	Pancreas1	protein_coding	chr11	0.262818	7.67e-22	-3.6	0.0796	11:133000260-11:134205993
ENSG00000170425	ADORA2B	Brain_Anterior_cingulate_cortex_BA241	protein_coding	chr17	0.110703	3.83e-05	4.75	0.079	17:15020965-17:16411522
ENSG00000122550	KLHL7	Colon_Sigmoid1	protein_coding	chr7	0.0478992	8.31e-05	-4.2	0.0784	7:22508611-7:23469560
ENSG00000141027	NCOR1	Spleen1	protein_coding	chr17	0.039203	0.00273202	4.67	0.0783	17:15020965-17:16411522
ENSG00000133256	PDE6B	Brain_Cerebellar_Hemisphere1	protein_coding	chr4	0.0817722	0.000124961	2.73	0.0776	4:695146-4:1478711
ENSG00000214401	KANSL1-AS1	Brain_Hippocampus1	lncRNA	chr17	0.597598	4.84e-34	-9.17	0.0776	17:43056905-17:45876022
ENSG00000214941	ZSWIM7	Brain_Putamen_basal_ganglia1	protein_coding	chr17	0.294888	2e-14	4.98	0.0774	17:15020965-17:16411522
ENSG00000127419	TMEM175	Brain_Cerebellar_Hemisphere1	protein_coding	chr4	0.180382	4.69e-09	-6.67	0.077	4:695146-4:1478711
ENSG00000103496	STX4	Brain_Hippocampus1	protein_coding	chr16	0.0380813	0.0120113	5.39	0.0736	16:29036613-16:31382470
ENSG00000167395	ZNF646	Brain_Hippocampus1	protein_coding	chr16	0.093508	6.49e-05	-5.39	0.0736	16:29036613-16:31382470
ENSG00000108379	WNT3	Brain_Hypothalamus1	protein_coding	chr17	0.651181	2.88e-40	-9.1	0.0736	17:43056905-17:45876022
ENSG00000141027	NCOR1	Brain_Nucleus_accumbens_basal_ganglia1	protein_coding	chr17	0.0494163	0.00147419	4.93	0.073	17:15020965-17:16411522
ENSG00000230658	KLHL7-DT	Brain_Cortex1	lncRNA	chr7	0.610751	1.83e-43	-4.6	0.0705	7:22508611-7:23469560
ENSG00000272182	AC135507.1	Stomach1	lncRNA	chr3	0.0328868	0.00104227	-3.63	0.0694	3:58157850-3:60272829
ENSG00000011295	TTC19	Brain_Cortex1	protein_coding	chr17	0.114123	7.28e-07	-4.9	0.0691	17:15020965-17:16411522
ENSG00000188906	LRRK2	Stomach1	protein_coding	chr12	0.0826001	1.4e-07	3.55	0.0681	12:39227446-12:40816185
ENSG00000262372	CR936218.1	Brain_Nucleus_accumbens_basal_ganglia1	lncRNA	chr17	0.0254365	0.0233768	9.11	0.0676	17:43056905-17:45876022
ENSG00000099381	SETD1A	Small_Intestine_Terminal_Ileum1	protein_coding	chr16	0.0400377	0.00811548	-5.39	0.0675	16:29036613-16:31382470
ENSG00000103496	STX4	Small_Intestine_Terminal_Ileum1	protein_coding	chr16	0.07389	0.000285222	-5.39	0.0675	16:29036613-16:31382470
ENSG00000099365	STX1B	Small_Intestine_Terminal_Ileum1	protein_coding	chr16	0.106066	1.16e-05	-5.39	0.0675	16:29036613-16:31382470
ENSG00000136243	NUPL2	Brain_Substantia_nigra1	protein_coding	chr7	0.388957	1.25e-13	4.21	0.0673	7:22508611-7:23469560
ENSG00000099377	HSD3B7	Brain_Amygdala1	protein_coding	chr16	0.0725123	0.00202946	-5.58	0.0672	16:29036613-16:31382470
ENSG00000167395	ZNF646	Brain_Cerebellum1	protein_coding	chr16	0.0438317	0.00234762	-5.39	0.0669	16:29036613-16:31382470
ENSG00000279685	MAPT-IT1	Brain_Hypothalamus1	lncRNA	chr17	0.0889224	7.83e-05	-9.11	0.0648	17:43056905-17:45876022
ENSG00000238083	LRRC37A2	Brain_Cortex1	protein_coding	chr17	0.730578	1.01e-59	-9.28	0.0642	17:43056905-17:45876022
ENSG00000178950	GAK	Brain_Cerebellum1	protein_coding	chr4	0.100946	2.76e-06	7.01	0.0633	4:695146-4:1478711
ENSG00000133256	PDE6B	Brain_Cerebellum1	protein_coding	chr4	0.119296	3.03e-07	2.73	0.0627	4:695146-4:1478711
ENSG00000108379	WNT3	Pancreas1	protein_coding	chr17	0.258657	1.81e-21	-9.01	0.0622	17:43056905-17:45876022
ENSG00000179344	HLA-DQB1	Brain_Frontal_Cortex_BA91	protein_coding	chr6	0.451471	2.47e-24	-4.14	0.0619	6:31571337-6:32682664
ENSG00000103496	STX4	Brain_Hypothalamus1	protein_coding	chr16	0.196714	1.38e-09	5.43	0.0615	16:29036613-16:31382470
ENSG00000107651	SEC23IP	Brain_Anterior_cingulate_cortex_BA241	protein_coding	chr10	0.0853723	0.000329404	3.51	0.0597	10:120591693-10:122407323
ENSG00000169242	EFNA1	Brain_Putamen_basal_ganglia1	protein_coding	chr1	0.106117	1.46e-05	3.51	0.0597	1:154770403-1:156336133
ENSG00000152127	MGAT5	Brain_Cerebellar_Hemisphere1	protein_coding	chr2	0.0705238	0.00038248	3.46	0.0594	2:135159453-2:137042794
ENSG00000243368	MCCC1-AS1	Brain_Putamen_basal_ganglia1	lncRNA	chr3	0.0465369	0.00472376	-3.95	0.0592	3:181511166-3:183769683
ENSG00000214941	ZSWIM7	Brain_Cortex1	protein_coding	chr17	0.515311	9.21e-34	4.87	0.0588	17:15020965-17:16411522
ENSG00000260911	AC135050.3	Brain_Anterior_cingulate_cortex_BA241	lncRNA	chr16	0.146948	1.65e-06	-5.33	0.0583	16:29036613-16:31382470
ENSG00000184445	KNTC1	Brain_Amygdala1	protein_coding	chr12	0.0531559	0.00857286	-3.5	0.0581	12:122009763-12:124976982
ENSG00000182782	HCAR2	Colon_Transverse1	protein_coding	chr12	0.0269023	0.00159326	-3.52	0.057	12:122009763-12:124976982
ENSG00000275263	AC135048.3	Liver1	lncRNA	chr16	0.0294591	0.0131795	5.7	0.0569	16:29036613-16:31382470
ENSG00000099385	BCL7C	Brain_Nucleus_accumbens_basal_ganglia1	protein_coding	chr16	0.0672443	0.00019405	-5.15	0.0563	16:29036613-16:31382470
ENSG00000122550	KLHL7	Stomach1	protein_coding	chr7	0.0369558	0.000502471	-4.05	0.0561	7:22508611-7:23469560
ENSG00000228696	ARL17B	Brain_Amygdala1	protein_coding	chr17	0.35615	8.42e-14	-9.07	0.056	17:43056905-17:45876022
ENSG00000145217	SLC26A1	Brain_Caudate_basal_ganglia1	protein_coding	chr4	0.249352	1.25e-13	4.55	0.0557	4:695146-4:1478711
ENSG00000179344	HLA-DQB1	Brain_Cerebellum1	protein_coding	chr6	0.575513	2.22e-40	3.18	0.0543	6:31571337-6:32682664
ENSG00000189157	FAM47E	Small_Intestine_Terminal_Ileum1	protein_coding	chr4	0.135079	6.07e-07	-3.96	0.0533	4:77130707-4:79093979
ENSG00000189157	FAM47E	Liver1	protein_coding	chr4	0.356933	1.64e-21	-3.53	0.0516	4:77130707-4:79093979
ENSG00000169242	EFNA1	Brain_Cerebellum1	protein_coding	chr1	0.169818	5.67e-10	4.58	0.0507	1:154770403-1:156336133
ENSG00000156858	PRR14	Brain_Anterior_cingulate_cortex_BA241	protein_coding	chr16	0.0607073	0.00262697	5.28	0.0506	16:29036613-16:31382470
ENSG00000230658	KLHL7-DT	Liver1	lncRNA	chr7	0.444643	4.06e-28	-4.73	0.0497	7:22508611-7:23469560
ENSG00000168301	KCTD6	Brain_Hypothalamus1	protein_coding	chr3	0.034183	0.0157921	-3.45	0.0494	3:58157850-3:60272829
ENSG00000163687	DNASE1L3	Pancreas1	protein_coding	chr3	0.027158	0.00390182	-3.45	0.0492	3:58157850-3:60272829
ENSG00000163687	DNASE1L3	Pituitary1	protein_coding	chr3	0.0514848	0.000430433	-3.45	0.049	3:58157850-3:60272829
ENSG00000078070	MCCC1	Brain_Putamen_basal_ganglia1	protein_coding	chr3	0.185846	4.39e-09	-0.24	0.0484	3:181511166-3:183769683
ENSG00000225190	PLEKHM1	Colon_Transverse1	protein_coding	chr17	0.0392162	0.000131355	-8.3	0.0482	17:43056905-17:45876022
ENSG00000204290	BTNL2	Brain_Caudate_basal_ganglia1	protein_coding	chr6	0.133642	1.59e-07	3.45	0.0471	6:31571337-6:32682664
ENSG00000118564	FBXL5	Small_Intestine_Terminal_Ileum1	protein_coding	chr4	0.0717935	0.000350865	-3.43	0.046	4:15147446-4:15926136
ENSG00000122550	KLHL7	Brain_Nucleus_accumbens_basal_ganglia1	protein_coding	chr7	0.039324	0.00466832	-3.82	0.0455	7:22508611-7:23469560
ENSG00000103496	STX4	Brain_Caudate_basal_ganglia1	protein_coding	chr16	0.0420942	0.00410737	5.42	0.0448	16:29036613-16:31382470
ENSG00000225914	TSBP1-AS1	Brain_Hypothalamus1	lncRNA	chr6	0.0482806	0.00398887	3.42	0.0447	6:31571337-6:32682664
ENSG00000118804	STBD1	Colon_Transverse1	protein_coding	chr4	0.108279	9.67e-11	3.6	0.0447	4:77130707-4:79093979
ENSG00000248360	LINC00504	Brain_Cerebellum1	lncRNA	chr4	0.0225252	0.0300808	3.55	0.0446	4:15147446-4:15926136
ENSG00000236234	AC091132.2	Brain_Cerebellar_Hemisphere1	lncRNA	chr17	0.120529	2.51e-06	9.44	0.0444	17:43056905-17:45876022
ENSG00000133065	SLC41A1	Pituitary1	protein_coding	chr1	0.0684718	4.54e-05	1.39	0.044	1:204681068-1:205922403
ENSG00000176681	LRRC37A	Brain_Amygdala1	protein_coding	chr17	0.577101	1.71e-25	0.235	0.0439	17:43056905-17:45876022
ENSG00000225914	TSBP1-AS1	Brain_Hippocampus1	lncRNA	chr6	0.0238999	0.0474054	3.42	0.0439	6:31571337-6:32682664
ENSG00000011295	TTC19	Pituitary1	protein_coding	chr17	0.152502	4.69e-10	-4.33	0.0439	17:15020965-17:16411522
ENSG00000189157	FAM47E	Stomach1	protein_coding	chr4	0.389163	2.42e-36	-5.5	0.0436	4:77130707-4:79093979
ENSG00000145335	SNCA	Brain_Caudate_basal_ganglia1	protein_coding	chr4	0.0385143	0.00609712	-7.38	0.0435	4:90231746-4:91560677
ENSG00000228696	ARL17B	Brain_Hypothalamus1	protein_coding	chr17	0.441241	5.37e-23	-9.07	0.0425	17:43056905-17:45876022
ENSG00000272182	AC135507.1	Spleen1	lncRNA	chr3	0.089973	4.21e-06	-3.41	0.0424	3:58157850-3:60272829
ENSG00000188906	LRRK2	Colon_Transverse1	protein_coding	chr12	0.0945566	1.69e-09	3.4	0.0423	12:39227446-12:40816185
ENSG00000121988	ZRANB3	Brain_Cerebellar_Hemisphere1	protein_coding	chr2	0.0339332	0.0146742	3.32	0.0416	2:135159453-2:137042794
ENSG00000178222	RNF212	Stomach1	protein_coding	chr4	0.0380345	0.000414253	3.32	0.0416	4:695146-4:1478711
ENSG00000244161	FLNB-AS1	Stomach1	lncRNA	chr3	0.0779988	3.23e-07	-3.47	0.0404	3:58157850-3:60272829
ENSG00000138722	MMRN1	Whole_Blood1	protein_coding	chr4	0.0302813	5.89e-06	-3.46	0.0399	4:90231746-4:91560677
ENSG00000118804	STBD1	Colon_Sigmoid1	protein_coding	chr4	0.158754	1.52e-13	4.04	0.0397	4:77130707-4:79093979
ENSG00000272182	AC135507.1	Whole_Blood1	lncRNA	chr3	0.0178201	0.000531388	-3.38	0.0397	3:58157850-3:60272829
ENSG00000176681	LRRC37A	Brain_Putamen_basal_ganglia1	protein_coding	chr17	0.617545	6.74e-37	-9.17	0.0396	17:43056905-17:45876022
ENSG00000260911	AC135050.3	Brain_Hypothalamus1	lncRNA	chr16	0.0827452	0.00014261	-5.34	0.0395	16:29036613-16:31382470
ENSG00000167394	ZNF668	Spleen1	protein_coding	chr16	0.0411085	0.00214163	4.95	0.0394	16:29036613-16:31382470
ENSG00000244161	FLNB-AS1	Spleen1	lncRNA	chr3	0.129904	2.28e-08	-3.39	0.0394	3:58157850-3:60272829
ENSG00000176597	B3GNT5	Colon_Transverse1	protein_coding	chr3	0.0194516	0.00737353	3.84	0.0391	3:181511166-3:183769683
ENSG00000244161	FLNB-AS1	Liver1	lncRNA	chr3	0.062267	0.000278192	-3.37	0.039	3:58157850-3:60272829
ENSG00000163687	DNASE1L3	Small_Intestine_Terminal_Ileum1	protein_coding	chr3	0.0631612	0.000822576	-3.39	0.039	3:58157850-3:60272829
ENSG00000272360	AC116036.2	Brain_Substantia_nigra1	lncRNA	chr3	0.187499	1.5e-06	-3.37	0.0388	3:58157850-3:60272829
ENSG00000167395	ZNF646	Brain_Caudate_basal_ganglia1	protein_coding	chr16	0.0608109	0.000527852	-5.39	0.0387	16:29036613-16:31382470
ENSG00000225914	TSBP1-AS1	Colon_Transverse1	lncRNA	chr6	0.0330499	0.000456874	3.37	0.0381	6:31571337-6:32682664
ENSG00000244161	FLNB-AS1	Small_Intestine_Terminal_Ileum1	lncRNA	chr3	0.0764363	0.000221745	-3.37	0.0373	3:58157850-3:60272829
ENSG00000048342	CC2D2A	Whole_Blood1	protein_coding	chr4	0.0768427	2.76e-13	3.39	0.0372	4:15147446-4:15926136
ENSG00000244161	FLNB-AS1	Colon_Sigmoid1	lncRNA	chr3	0.135496	1.22e-11	-3.37	0.037	3:58157850-3:60272829
ENSG00000107651	SEC23IP	Brain_Nucleus_accumbens_basal_ganglia1	protein_coding	chr10	0.0287084	0.0159243	3.35	0.0363	10:120591693-10:122407323
ENSG00000184445	KNTC1	Small_Intestine_Terminal_Ileum1	protein_coding	chr12	0.0350573	0.0133636	-3.35	0.0362	12:122009763-12:124976982
ENSG00000107651	SEC23IP	Brain_Caudate_basal_ganglia1	protein_coding	chr10	0.0943176	1.33e-05	3.35	0.0361	10:120591693-10:122407323
ENSG00000107651	SEC23IP	Brain_Cortex1	protein_coding	chr10	0.0225056	0.0317954	3.35	0.0361	10:120591693-10:122407323
ENSG00000107651	SEC23IP	Brain_Substantia_nigra1	protein_coding	chr10	0.0345712	0.0476301	3.35	0.0361	10:120591693-10:122407323
ENSG00000152128	TMEM163	Whole_Blood1	protein_coding	chr2	0.132048	2.41e-22	-3.35	0.036	2:135159453-2:137042794
ENSG00000226816	AC005082.1	Colon_Sigmoid1	lncRNA	chr7	0.230347	1e-19	-3.87	0.0358	7:22508611-7:23469560
ENSG00000236104	ZBTB22	Spleen1	protein_coding	chr6	0.0484691	0.000838508	-3.34	0.0356	6:31571337-6:32682664
ENSG00000204267	TAP2	Brain_Caudate_basal_ganglia1	protein_coding	chr6	0.33584	8.52e-19	3.37	0.0355	6:31571337-6:32682664
ENSG00000174840	PDE12	Brain_Cerebellum1	protein_coding	chr3	0.0192373	0.045198	3.35	0.0355	3:58157850-3:60272829
ENSG00000127415	IDUA	Small_Intestine_Terminal_Ileum1	protein_coding	chr4	0.130231	9.99e-07	-8.67	0.0351	4:695146-4:1478711
ENSG00000260911	AC135050.3	Pituitary1	lncRNA	chr16	0.220427	2.14e-14	-4.8	0.035	16:29036613-16:31382470
ENSG00000103496	STX4	Brain_Frontal_Cortex_BA91	protein_coding	chr16	0.164641	2.54e-08	5.41	0.0349	16:29036613-16:31382470
ENSG00000099365	STX1B	Colon_Sigmoid1	protein_coding	chr16	0.0231323	0.00658068	-5.15	0.0341	16:29036613-16:31382470
ENSG00000108379	WNT3	Brain_Amygdala1	protein_coding	chr17	0.499316	8.3e-21	-0.566	0.034	17:43056905-17:45876022
ENSG00000196118	CCDC189	Brain_Frontal_Cortex_BA91	protein_coding	chr16	0.198962	6.16e-10	5.39	0.034	16:29036613-16:31382470
ENSG00000103496	STX4	Brain_Cortex1	protein_coding	chr16	0.0694044	0.000135322	5.42	0.0333	16:29036613-16:31382470
ENSG00000244161	FLNB-AS1	Colon_Transverse1	lncRNA	chr3	0.0968462	1.05e-09	-3.28	0.0333	3:58157850-3:60272829
ENSG00000136243	NUPL2	Whole_Blood1	protein_coding	chr7	0.069935	3.49e-12	5.23	0.0332	7:22508611-7:23469560
ENSG00000103496	STX4	Brain_Substantia_nigra1	protein_coding	chr16	0.0484155	0.0186553	5.58	0.033	16:29036613-16:31382470
ENSG00000182782	HCAR2	Whole_Blood1	protein_coding	chr12	0.0299786	6.56e-06	-3.32	0.033	12:122009763-12:124976982
ENSG00000226816	AC005082.1	Colon_Transverse1	lncRNA	chr7	0.172494	8.88e-17	-3.65	0.0324	7:22508611-7:23469560
ENSG00000230658	KLHL7-DT	Small_Intestine_Terminal_Ileum1	lncRNA	chr7	0.526736	9.54e-30	-4.41	0.0324	7:22508611-7:23469560
ENSG00000228696	ARL17B	Brain_Hippocampus1	protein_coding	chr17	0.374072	2.64e-18	-9.07	0.0321	17:43056905-17:45876022
ENSG00000189157	FAM47E	Brain_Hippocampus1	protein_coding	chr4	0.385374	5.89e-19	-2.96	0.032	4:77130707-4:79093979
ENSG00000082258	CCNT2	Stomach1	protein_coding	chr2	0.151094	3.96e-13	3.34	0.0319	2:135159453-2:137042794
ENSG00000235560	AC002310.1	Brain_Nucleus_accumbens_basal_ganglia1	lncRNA	chr16	0.0366145	0.00637276	-2.2	0.0316	16:29036613-16:31382470
ENSG00000260911	AC135050.3	Spleen1	lncRNA	chr16	0.26701	6.77e-17	-4.91	0.0316	16:29036613-16:31382470
ENSG00000144730	IL17RD	Brain_Cerebellar_Hemisphere1	protein_coding	chr3	0.0283398	0.025951	3.31	0.0314	3:58157850-3:60272829
ENSG00000260911	AC135050.3	Brain_Spinal_cord_cervical_c-11	lncRNA	chr16	0.313349	9.48e-12	-5.08	0.0312	16:29036613-16:31382470
ENSG00000168306	ACOX2	Colon_Sigmoid1	protein_coding	chr3	0.0720983	1.18e-06	-3.32	0.0312	3:58157850-3:60272829
ENSG00000260911	AC135050.3	Brain_Cerebellum1	lncRNA	chr16	0.399408	1.05e-24	-5.24	0.0311	16:29036613-16:31382470
ENSG00000168306	ACOX2	Stomach1	protein_coding	chr3	0.0332596	0.000974768	-3.39	0.0308	3:58157850-3:60272829
ENSG00000127415	IDUA	Whole_Blood1	protein_coding	chr4	0.175811	6.56e-30	-6.57	0.0308	4:695146-4:1478711
ENSG00000133065	SLC41A1	Whole_Blood1	protein_coding	chr1	0.0948406	3.48e-16	0.388	0.0296	1:204681068-1:205922403
ENSG00000260911	AC135050.3	Colon_Transverse1	lncRNA	chr16	0.21264	8.94e-21	-4.96	0.0294	16:29036613-16:31382470
ENSG00000108379	WNT3	Spleen1	protein_coding	chr17	0.112054	2.4e-07	-9.35	0.0291	17:43056905-17:45876022
ENSG00000225914	TSBP1-AS1	Brain_Caudate_basal_ganglia1	lncRNA	chr6	0.203893	3.89e-11	3.28	0.0287	6:31571337-6:32682664
ENSG00000243364	EFNA4	Pituitary1	protein_coding	chr1	0.0197808	0.030425	3.75	0.0277	1:154770403-1:156336133
ENSG00000232629	HLA-DQB2	Colon_Sigmoid1	protein_coding	chr6	0.604033	1.55e-65	2.53	0.0275	6:31571337-6:32682664
ENSG00000243368	MCCC1-AS1	Stomach1	lncRNA	chr3	0.0469297	8.46e-05	-3.26	0.0274	3:181511166-3:183769683
ENSG00000103496	STX4	Brain_Amygdala1	protein_coding	chr16	0.0695574	0.00252789	5.39	0.0273	16:29036613-16:31382470
ENSG00000178222	RNF212	Brain_Anterior_cingulate_cortex_BA241	protein_coding	chr4	0.121464	1.52e-05	2.97	0.0273	4:695146-4:1478711
ENSG00000179195	ZNF664	Pancreas1	protein_coding	chr12	0.0435558	0.000242243	-3.35	0.0266	12:122009763-12:124976982
ENSG00000035499	DEPDC1B	Brain_Cerebellar_Hemisphere1	protein_coding	chr5	0.201984	4.41e-10	-3.25	0.0264	5:58524622-5:60935451
ENSG00000226816	AC005082.1	Brain_Substantia_nigra1	lncRNA	chr7	0.102534	0.000514409	-3.03	0.0264	7:22508611-7:23469560
ENSG00000236263	AC234582.2	Pituitary1	lncRNA	chr1	0.0424441	0.00142694	-3.74	0.0261	1:154770403-1:156336133
ENSG00000175938	ORAI3	Brain_Nucleus_accumbens_basal_ganglia1	protein_coding	chr16	0.0903304	1.39e-05	4.99	0.0259	16:29036613-16:31382470
ENSG00000151006	PRSS53	Whole_Blood1	protein_coding	chr16	0.0450219	2.94e-08	5.16	0.0256	16:29036613-16:31382470
ENSG00000165672	PRDX3	Colon_Sigmoid1	protein_coding	chr10	0.03622	0.000645635	3.24	0.0255	10:120591693-10:122407323
ENSG00000214401	KANSL1-AS1	Brain_Cerebellar_Hemisphere1	lncRNA	chr17	0.605615	8.64e-37	-9.38	0.0253	17:43056905-17:45876022
ENSG00000196126	HLA-DRB1	Colon_Transverse1	protein_coding	chr6	0.178459	2.32e-17	3.01	0.0252	6:31571337-6:32682664
ENSG00000260911	AC135050.3	Brain_Frontal_Cortex_BA91	lncRNA	chr16	0.0995773	2.1e-05	-5.35	0.0251	16:29036613-16:31382470
ENSG00000103510	KAT8	Pituitary1	protein_coding	chr16	0.341635	4.13e-23	-4.73	0.0249	16:29036613-16:31382470
ENSG00000264589	MAPT-AS1	Brain_Cerebellar_Hemisphere1	lncRNA	chr17	0.113644	5.07e-06	9.38	0.0245	17:43056905-17:45876022
ENSG00000226816	AC005082.1	Brain_Cerebellum1	lncRNA	chr7	0.10546	1.61e-06	-3.02	0.0244	7:22508611-7:23469560
ENSG00000178222	RNF212	Brain_Frontal_Cortex_BA91	protein_coding	chr4	0.0923456	4.35e-05	2.97	0.0244	4:695146-4:1478711
ENSG00000143537	ADAM15	Brain_Substantia_nigra1	protein_coding	chr1	0.137893	4.75e-05	-3.71	0.0243	1:154770403-1:156336133
ENSG00000136235	GPNMB	Spleen1	protein_coding	chr7	0.177301	3.61e-11	4.04	0.0243	7:22508611-7:23469560
ENSG00000167394	ZNF668	Small_Intestine_Terminal_Ileum1	protein_coding	chr16	0.055838	0.0016945	4.75	0.0242	16:29036613-16:31382470
ENSG00000122550	KLHL7	Brain_Caudate_basal_ganglia1	protein_coding	chr7	0.0989166	7.96e-06	-3.89	0.024	7:22508611-7:23469560
ENSG00000141027	NCOR1	Brain_Putamen_basal_ganglia1	protein_coding	chr17	0.0230742	0.0479921	4.72	0.024	17:15020965-17:16411522
ENSG00000225342	AC079630.1	Brain_Caudate_basal_ganglia1	lncRNA	chr12	0.162819	5.42e-09	-3.1	0.0239	12:39227446-12:40816185
ENSG00000243368	MCCC1-AS1	Brain_Cerebellar_Hemisphere1	lncRNA	chr3	0.0880353	6.69e-05	-2.91	0.0238	3:181511166-3:183769683
ENSG00000169020	ATP5ME	Spleen1	protein_coding	chr4	0.0206973	0.0302448	-2.98	0.0236	4:695146-4:1478711
ENSG00000189157	FAM47E	Brain_Cerebellum1	protein_coding	chr4	0.434591	1.96e-27	-3.59	0.0235	4:77130707-4:79093979
ENSG00000099377	HSD3B7	Colon_Transverse1	protein_coding	chr16	0.190759	1.42e-18	-4.85	0.0231	16:29036613-16:31382470
ENSG00000151923	TIAL1	Colon_Transverse1	protein_coding	chr10	0.0157682	0.0159422	-3.2	0.023	10:120591693-10:122407323
ENSG00000197653	DNAH10	Pituitary1	protein_coding	chr12	0.104964	3.41e-07	3.19	0.0229	12:122009763-12:124976982
ENSG00000235560	AC002310.1	Brain_Caudate_basal_ganglia1	lncRNA	chr16	0.0590706	0.000638554	-2.19	0.0228	16:29036613-16:31382470
ENSG00000103510	KAT8	Spleen1	protein_coding	chr16	0.158106	5.1e-10	-4.77	0.0228	16:29036613-16:31382470
ENSG00000185619	PCGF3	Brain_Putamen_basal_ganglia1	protein_coding	chr4	0.174442	1.46e-08	-2.79	0.0224	4:695146-4:1478711
ENSG00000225914	TSBP1-AS1	Brain_Spinal_cord_cervical_c-11	lncRNA	chr6	0.0408524	0.0232284	3.83	0.022	6:31571337-6:32682664
ENSG00000204371	EHMT2	Brain_Caudate_basal_ganglia1	protein_coding	chr6	0.13497	1.37e-07	3.19	0.0219	6:31571337-6:32682664
ENSG00000138760	SCARB2	Colon_Sigmoid1	protein_coding	chr4	0.0705225	1.56e-06	3.9	0.0216	4:77130707-4:79093979
ENSG00000107651	SEC23IP	Brain_Frontal_Cortex_BA91	protein_coding	chr10	0.0983591	2.38e-05	3.18	0.0215	10:120591693-10:122407323
ENSG00000133065	SLC41A1	Brain_Hippocampus1	protein_coding	chr1	0.157255	1.34e-07	1.67	0.0212	1:204681068-1:205922403
ENSG00000226816	AC005082.1	Pancreas1	lncRNA	chr7	0.0870935	1.52e-07	-4.16	0.0212	7:22508611-7:23469560
ENSG00000235560	AC002310.1	Pituitary1	lncRNA	chr16	0.0872196	3.73e-06	-2.32	0.0211	16:29036613-16:31382470
ENSG00000196735	HLA-DQA1	Brain_Spinal_cord_cervical_c-11	protein_coding	chr6	0.223976	2.19e-08	-2.46	0.021	6:31571337-6:32682664
ENSG00000069275	NUCKS1	Brain_Putamen_basal_ganglia1	protein_coding	chr1	0.0407675	0.00828061	-3.75	0.0206	1:204681068-1:205922403
ENSG00000179195	ZNF664	Pituitary1	protein_coding	chr12	0.0280373	0.00981194	-3.14	0.0203	12:122009763-12:124976982
ENSG00000170425	ADORA2B	Pituitary1	protein_coding	chr17	0.235535	2.08e-15	4.13	0.0201	17:15020965-17:16411522
ENSG00000178222	RNF212	Colon_Transverse1	protein_coding	chr4	0.130784	8.21e-13	2.03	0.0198	4:695146-4:1478711
ENSG00000163689	C3orf67	Pituitary1	protein_coding	chr3	0.0192308	0.0328503	3.16	0.0197	3:58157850-3:60272829
ENSG00000204351	SKIV2L	Pancreas1	protein_coding	chr6	0.482434	3.04e-45	3.16	0.0195	6:31571337-6:32682664
ENSG00000225342	AC079630.1	Brain_Hippocampus1	lncRNA	chr12	0.0545198	0.00254174	-3.12	0.0193	12:39227446-12:40816185
ENSG00000169026	SLC49A3	Brain_Putamen_basal_ganglia1	protein_coding	chr4	0.116131	5.43e-06	1.16	0.0192	4:695146-4:1478711
ENSG00000048342	CC2D2A	Colon_Transverse1	protein_coding	chr4	0.0558666	4.56e-06	3.14	0.0191	4:15147446-4:15926136
ENSG00000169242	EFNA1	Brain_Spinal_cord_cervical_c-11	protein_coding	chr1	0.142631	1.3e-05	3.75	0.0188	1:154770403-1:156336133
ENSG00000186868	MAPT	Brain_Cerebellar_Hemisphere1	protein_coding	chr17	0.0518215	0.00244767	9.34	0.0185	17:43056905-17:45876022
ENSG00000235560	AC002310.1	Brain_Cerebellar_Hemisphere1	lncRNA	chr16	0.0550099	0.00178314	-3.04	0.0184	16:29036613-16:31382470
ENSG00000103510	KAT8	Colon_Transverse1	protein_coding	chr16	0.341275	4.72e-35	-4.84	0.0182	16:29036613-16:31382470
ENSG00000224389	C4B	Pancreas1	protein_coding	chr6	0.0751609	1.16e-06	-3.13	0.0182	6:31571337-6:32682664
ENSG00000107651	SEC23IP	Pituitary1	protein_coding	chr10	0.0235588	0.0180561	3.12	0.018	10:120591693-10:122407323
ENSG00000162877	PM20D1	Brain_Amygdala1	protein_coding	chr1	0.162455	2.18e-06	-1.48	0.0179	1:204681068-1:205922403
ENSG00000099365	STX1B	Stomach1	protein_coding	chr16	0.134139	1.01e-11	-5.27	0.0179	16:29036613-16:31382470
ENSG00000225914	TSBP1-AS1	Brain_Amygdala1	lncRNA	chr6	0.0698295	0.00247729	3.12	0.0178	6:31571337-6:32682664
ENSG00000230658	KLHL7-DT	Brain_Spinal_cord_cervical_c-11	lncRNA	chr7	0.618307	1.05e-27	-4.69	0.0177	7:22508611-7:23469560
ENSG00000107651	SEC23IP	Colon_Transverse1	protein_coding	chr10	0.0242422	0.00274488	3.11	0.0176	10:120591693-10:122407323
ENSG00000169762	TAPT1	Whole_Blood1	protein_coding	chr4	0.0818219	4.4e-14	-3.07	0.0174	4:15147446-4:15926136
ENSG00000176681	LRRC37A	Brain_Hippocampus1	protein_coding	chr17	0.545917	9.57e-30	-8.99	0.0171	17:43056905-17:45876022
ENSG00000186212	SOWAHB	Colon_Sigmoid1	protein_coding	chr4	0.019743	0.0121335	2.04	0.017	4:77130707-4:79093979
ENSG00000109743	BST1	Whole_Blood1	protein_coding	chr4	0.0606055	1.05e-10	-3.04	0.0169	4:15147446-4:15926136
ENSG00000122550	KLHL7	Colon_Transverse1	protein_coding	chr7	0.106472	1.41e-10	-3.76	0.0168	7:22508611-7:23469560
ENSG00000196735	HLA-DQA1	Brain_Hippocampus1	protein_coding	chr6	0.177772	1.7e-08	3.1	0.0166	6:31571337-6:32682664
ENSG00000215375	MYL5	Brain_Cortex1	protein_coding	chr4	0.0817333	3.25e-05	3.1	0.0165	4:695146-4:1478711
ENSG00000232629	HLA-DQB2	Colon_Transverse1	protein_coding	chr6	0.603206	1.85e-75	2.6	0.0164	6:31571337-6:32682664
ENSG00000099381	SETD1A	Brain_Cerebellum1	protein_coding	chr16	0.0651829	0.000190835	-5.07	0.0163	16:29036613-16:31382470
ENSG00000172992	DCAKD	Stomach1	protein_coding	chr17	0.21347	1.54e-18	-3.24	0.0162	17:43056905-17:45876022
ENSG00000223534	HLA-DQB1-AS1	Pancreas1	lncRNA	chr6	0.28282	1.15e-23	-3.09	0.0161	6:31571337-6:32682664
ENSG00000214401	KANSL1-AS1	Brain_Cerebellum1	lncRNA	chr17	0.633362	5.5e-47	-9.25	0.016	17:43056905-17:45876022
ENSG00000176681	LRRC37A	Brain_Caudate_basal_ganglia1	protein_coding	chr17	0.594686	1.66e-39	-9.07	0.0158	17:43056905-17:45876022
ENSG00000118804	STBD1	Brain_Putamen_basal_ganglia1	protein_coding	chr4	0.376034	6.17e-19	1.34	0.0157	4:77130707-4:79093979
ENSG00000178222	RNF212	Brain_Cortex1	protein_coding	chr4	0.103271	2.62e-06	2.59	0.0156	4:695146-4:1478711
ENSG00000143537	ADAM15	Brain_Putamen_basal_ganglia1	protein_coding	chr1	0.189513	2.98e-09	-3.07	0.0156	1:154770403-1:156336133
ENSG00000160685	ZBTB7B	Colon_Sigmoid1	protein_coding	chr1	0.0291744	0.00224019	3.08	0.0156	1:154770403-1:156336133
ENSG00000168993	CPLX1	Colon_Transverse1	protein_coding	chr4	0.308616	3.48e-31	-1.03	0.0155	4:695146-4:1478711
ENSG00000226816	AC005082.1	Pituitary1	lncRNA	chr7	0.192382	1.46e-12	-3.3	0.0154	7:22508611-7:23469560
ENSG00000163749	CCDC158	Brain_Caudate_basal_ganglia1	protein_coding	chr4	0.0571922	0.000784239	-3.08	0.0152	4:77130707-4:79093979
ENSG00000225342	AC079630.1	Brain_Putamen_basal_ganglia1	lncRNA	chr12	0.0889677	7.79e-05	-3.01	0.0149	12:39227446-12:40816185
ENSG00000260911	AC135050.3	Brain_Putamen_basal_ganglia1	lncRNA	chr16	0.121748	3.11e-06	-4.88	0.0149	16:29036613-16:31382470
ENSG00000049167	ERCC8	Brain_Cortex1	protein_coding	chr5	0.046729	0.00185176	-2.85	0.0147	5:58524622-5:60935451
ENSG00000163687	DNASE1L3	Brain_Cerebellum1	protein_coding	chr3	0.0214299	0.034426	-3.07	0.0146	3:58157850-3:60272829
ENSG00000235560	AC002310.1	Brain_Cortex1	lncRNA	chr16	0.0477186	0.00165162	-2.42	0.0146	16:29036613-16:31382470
ENSG00000127415	IDUA	Pancreas1	protein_coding	chr4	0.221303	3.36e-18	-6.62	0.0146	4:695146-4:1478711
ENSG00000078070	MCCC1	Brain_Cerebellar_Hemisphere1	protein_coding	chr3	0.0455951	0.00454978	-0.335	0.0145	3:181511166-3:183769683
ENSG00000107651	SEC23IP	Brain_Putamen_basal_ganglia1	protein_coding	chr10	0.0871206	9.33e-05	3.04	0.0142	10:120591693-10:122407323
ENSG00000198648	STK39	Colon_Transverse1	protein_coding	chr2	0.111904	4.52e-11	-3.04	0.0142	2:167356254-2:169968112
ENSG00000260911	AC135050.3	Brain_Hippocampus1	lncRNA	chr16	0.184352	8.69e-09	-5.05	0.0141	16:29036613-16:31382470
ENSG00000107651	SEC23IP	Small_Intestine_Terminal_Ileum1	protein_coding	chr10	0.0260809	0.0332612	3.04	0.014	10:120591693-10:122407323
ENSG00000133256	PDE6B	Brain_Hypothalamus1	protein_coding	chr4	0.141547	4.28e-07	2.56	0.0139	4:695146-4:1478711
ENSG00000163749	CCDC158	Colon_Sigmoid1	protein_coding	chr4	0.202744	2.79e-17	-3.87	0.0139	4:77130707-4:79093979
ENSG00000228696	ARL17B	Brain_Substantia_nigra1	protein_coding	chr17	0.344942	6.49e-12	-9.17	0.0138	17:43056905-17:45876022
ENSG00000176681	LRRC37A	Brain_Substantia_nigra1	protein_coding	chr17	0.449896	3.24e-16	-9.17	0.0138	17:43056905-17:45876022
ENSG00000214941	ZSWIM7	Brain_Amygdala1	protein_coding	chr17	0.266058	3.96e-10	4.38	0.0137	17:15020965-17:16411522
ENSG00000004468	CD38	Brain_Cerebellar_Hemisphere1	protein_coding	chr4	0.0618513	0.000904368	-4.06	0.0136	4:15147446-4:15926136
ENSG00000167394	ZNF668	Colon_Sigmoid1	protein_coding	chr16	0.0183248	0.0157094	4.95	0.0136	16:29036613-16:31382470
ENSG00000158715	SLC45A3	Colon_Transverse1	protein_coding	chr1	0.0295273	0.000933608	-2.65	0.0135	1:204681068-1:205922403
ENSG00000127415	IDUA	Pituitary1	protein_coding	chr4	0.0902604	2.48e-06	-6.46	0.0134	4:695146-4:1478711
ENSG00000226816	AC005082.1	Brain_Cortex1	lncRNA	chr7	0.0302654	0.0126069	-3.07	0.0133	7:22508611-7:23469560
ENSG00000179344	HLA-DQB1	Pituitary1	protein_coding	chr6	0.671667	9.3e-59	-3.05	0.0133	6:31571337-6:32682664
ENSG00000127415	IDUA	Spleen1	protein_coding	chr4	0.235126	8.66e-15	-6.58	0.0133	4:695146-4:1478711
ENSG00000238083	LRRC37A2	Brain_Putamen_basal_ganglia1	protein_coding	chr17	0.590505	2.14e-34	-9.04	0.0131	17:43056905-17:45876022
ENSG00000168993	CPLX1	Stomach1	protein_coding	chr4	0.138282	4.6e-12	-1.8	0.013	4:695146-4:1478711
ENSG00000234745	HLA-B	Brain_Anterior_cingulate_cortex_BA241	protein_coding	chr6	0.172041	1.76e-07	3.76	0.0129	6:31571337-6:32682664
ENSG00000164182	NDUFAF2	Colon_Sigmoid1	protein_coding	chr5	0.0684153	2.26e-06	2.49	0.0129	5:58524622-5:60935451
ENSG00000108379	WNT3	Brain_Hippocampus1	protein_coding	chr17	0.211397	5.21e-10	-8.85	0.0127	17:43056905-17:45876022
ENSG00000158715	SLC45A3	Brain_Putamen_basal_ganglia1	protein_coding	chr1	0.038987	0.0098539	-1.22	0.0127	1:204681068-1:205922403
ENSG00000249592	AC139887.2	Colon_Transverse1	lncRNA	chr4	0.0710032	2.12e-07	-0.617	0.0127	4:695146-4:1478711
ENSG00000184445	KNTC1	Brain_Spinal_cord_cervical_c-11	protein_coding	chr12	0.0441316	0.0182258	-3	0.0126	12:122009763-12:124976982
ENSG00000122550	KLHL7	Brain_Amygdala1	protein_coding	chr7	0.0309927	0.0459702	-3.55	0.0125	7:22508611-7:23469560
ENSG00000178950	GAK	Brain_Substantia_nigra1	protein_coding	chr4	0.109818	0.000316279	4.32	0.0125	4:695146-4:1478711
ENSG00000272182	AC135507.1	Colon_Sigmoid1	lncRNA	chr3	0.0357642	0.000699567	-3.03	0.0125	3:58157850-3:60272829
ENSG00000262372	CR936218.1	Pancreas1	lncRNA	chr17	0.0150468	0.032229	8.77	0.0125	17:43056905-17:45876022
ENSG00000204351	SKIV2L	Brain_Amygdala1	protein_coding	chr6	0.216558	2.75e-08	3	0.0124	6:31571337-6:32682664
ENSG00000099385	BCL7C	Brain_Cortex1	protein_coding	chr16	0.0713852	0.000107643	-5.23	0.0123	16:29036613-16:31382470
ENSG00000232759	AC002480.1	Brain_Cortex1	lncRNA	chr7	0.0489472	0.00143308	-3.08	0.0123	7:22508611-7:23469560
ENSG00000224389	C4B	Brain_Anterior_cingulate_cortex_BA241	protein_coding	chr6	0.0755732	0.000752314	-2.39	0.0122	6:31571337-6:32682664
ENSG00000178222	RNF212	Brain_Caudate_basal_ganglia1	protein_coding	chr4	0.0974471	9.38e-06	2.73	0.0121	4:695146-4:1478711
ENSG00000163749	CCDC158	Brain_Cerebellum1	protein_coding	chr4	0.0237436	0.0259066	-3.46	0.0121	4:77130707-4:79093979
ENSG00000049167	ERCC8	Liver1	protein_coding	chr5	0.0255065	0.0212078	-2.99	0.012	5:58524622-5:60935451
ENSG00000232748	AC135050.1	Brain_Cortex1	lncRNA	chr16	0.0256411	0.0218197	5.22	0.0116	16:29036613-16:31382470
ENSG00000103496	STX4	Liver1	protein_coding	chr16	0.0457757	0.00191515	-5.39	0.0115	16:29036613-16:31382470
ENSG00000133065	SLC41A1	Brain_Substantia_nigra1	protein_coding	chr1	0.0556666	0.0114993	1.49	0.0113	1:204681068-1:205922403
ENSG00000204351	SKIV2L	Brain_Anterior_cingulate_cortex_BA241	protein_coding	chr6	0.294204	1.28e-12	2.24	0.0112	6:31571337-6:32682664
ENSG00000164182	NDUFAF2	Brain_Hypothalamus1	protein_coding	chr5	0.0458189	0.00506476	2.93	0.0112	5:58524622-5:60935451
ENSG00000150967	ABCB9	Pituitary1	protein_coding	chr12	0.0621627	0.000104692	-2.99	0.0112	12:122009763-12:124976982
ENSG00000172992	DCAKD	Spleen1	protein_coding	chr17	0.299799	3.72e-19	-3.15	0.0112	17:43056905-17:45876022
ENSG00000264589	MAPT-AS1	Brain_Substantia_nigra1	lncRNA	chr17	0.177287	3.09e-06	9.14	0.0111	17:43056905-17:45876022
ENSG00000232748	AC135050.1	Pituitary1	lncRNA	chr16	0.0710805	3.21e-05	4.54	0.011	16:29036613-16:31382470
ENSG00000226816	AC005082.1	Spleen1	lncRNA	chr7	0.3003	3.43e-19	-2.79	0.0109	7:22508611-7:23469560
ENSG00000196735	HLA-DQA1	Brain_Frontal_Cortex_BA91	protein_coding	chr6	0.199898	5.55e-10	-2.46	0.0107	6:31571337-6:32682664
ENSG00000163687	DNASE1L3	Stomach1	protein_coding	chr3	0.0387986	0.000361332	-3	0.0107	3:58157850-3:60272829
ENSG00000264589	MAPT-AS1	Pituitary1	lncRNA	chr17	0.0168336	0.0460137	8.72	0.0106	17:43056905-17:45876022
ENSG00000185619	PCGF3	Brain_Caudate_basal_ganglia1	protein_coding	chr4	0.123014	5.34e-07	-2.48	0.0105	4:695146-4:1478711
ENSG00000272588	AC139887.4	Brain_Cerebellum1	lncRNA	chr4	0.0793684	3.59e-05	-3.64	0.0105	4:695146-4:1478711
ENSG00000004468	CD38	Pituitary1	protein_coding	chr4	0.0278431	0.0100734	2.94	0.0105	4:15147446-4:15926136
ENSG00000189157	FAM47E	Brain_Amygdala1	protein_coding	chr4	0.316101	4.11e-12	-2.94	0.0104	4:77130707-4:79093979
ENSG00000177234	LINC01561	Brain_Anterior_cingulate_cortex_BA241	lncRNA	chr10	0.0478219	0.00779009	-2.94	0.0104	10:120591693-10:122407323
ENSG00000273133	AC116651.1	Brain_Cerebellar_Hemisphere1	lncRNA	chr4	0.282024	4.02e-14	-1.43	0.0104	4:15147446-4:15926136
ENSG00000163354	DCST2	Brain_Spinal_cord_cervical_c-11	protein_coding	chr1	0.170257	1.58e-06	-2.35	0.0104	1:154770403-1:156336133
ENSG00000275371	AC012645.4	Small_Intestine_Terminal_Ileum1	lncRNA	chr16	0.313645	9.4e-16	-4.89	0.0104	16:29036613-16:31382470
ENSG00000197653	DNAH10	Stomach1	protein_coding	chr12	0.160773	6.06e-14	2.89	0.0104	12:122009763-12:124976982
ENSG00000204228	HSD17B8	Brain_Hippocampus1	protein_coding	chr6	0.0837375	0.000163378	-2.95	0.0103	6:31571337-6:32682664
ENSG00000184445	KNTC1	Brain_Putamen_basal_ganglia1	protein_coding	chr12	0.0587969	0.00144295	-3.87	0.0103	12:122009763-12:124976982
ENSG00000270048	AC068790.4	Colon_Transverse1	lncRNA	chr12	0.0168365	0.0127307	2.82	0.0103	12:122009763-12:124976982
ENSG00000089280	FUS	Spleen1	protein_coding	chr16	0.0258452	0.0153261	-4.57	0.0103	16:29036613-16:31382470
ENSG00000188906	LRRK2	Brain_Caudate_basal_ganglia1	protein_coding	chr12	0.128418	2.89e-07	2.43	0.0102	12:39227446-12:40816185
ENSG00000168993	CPLX1	Pancreas1	protein_coding	chr4	0.0520885	5.75e-05	-1.7	0.0101	4:695146-4:1478711
ENSG00000145198	VWA5B2	Stomach1	protein_coding	chr3	0.0206116	0.00966353	-2.92	0.0101	3:181511166-3:183769683
ENSG00000167397	VKORC1	Pituitary1	protein_coding	chr16	0.0659257	6.36e-05	4.51	0.00993	16:29036613-16:31382470
ENSG00000224043	CCNT2-AS1	Stomach1	lncRNA	chr2	0.0209916	0.00901085	-2.95	0.00991	2:135159453-2:137042794
ENSG00000168993	CPLX1	Spleen1	protein_coding	chr4	0.171036	8.62e-11	-1.21	0.00981	4:695146-4:1478711
ENSG00000260911	AC135050.3	Stomach1	lncRNA	chr16	0.181805	9.59e-16	-5.15	0.00981	16:29036613-16:31382470
ENSG00000228696	ARL17B	Brain_Cortex1	protein_coding	chr17	0.52117	2.66e-34	-9.07	0.00978	17:43056905-17:45876022
ENSG00000078070	MCCC1	Whole_Blood1	protein_coding	chr3	0.055497	6.68e-10	2.91	0.00963	3:181511166-3:183769683
ENSG00000196118	CCDC189	Brain_Amygdala1	protein_coding	chr16	0.109317	0.000129772	5.16	0.00961	16:29036613-16:31382470
ENSG00000163687	DNASE1L3	Colon_Sigmoid1	protein_coding	chr3	0.0402317	0.000318971	-2.93	0.00957	3:58157850-3:60272829
ENSG00000119242	CCDC92	Brain_Spinal_cord_cervical_c-11	protein_coding	chr12	0.0632252	0.00450957	2.9	0.00956	12:122009763-12:124976982
ENSG00000262881	CR936218.2	Liver1	lncRNA	chr17	0.455667	5.09e-29	8.69	0.00956	17:43056905-17:45876022
ENSG00000156219	ART3	Brain_Cerebellum1	protein_coding	chr4	0.344486	9.71e-21	-3.98	0.00955	4:77130707-4:79093979
ENSG00000215375	MYL5	Brain_Nucleus_accumbens_basal_ganglia1	protein_coding	chr4	0.086389	2.18e-05	2.94	0.00955	4:695146-4:1478711
ENSG00000163545	NUAK2	Brain_Putamen_basal_ganglia1	protein_coding	chr1	0.127785	1.71e-06	2.6	0.00952	1:204681068-1:205922403
ENSG00000169241	SLC50A1	Brain_Nucleus_accumbens_basal_ganglia1	protein_coding	chr1	0.0519613	0.00110341	-3.16	0.00951	1:154770403-1:156336133
ENSG00000076003	MCM6	Colon_Sigmoid1	protein_coding	chr2	0.0753124	6.69e-07	-2.91	0.00943	2:135159453-2:137042794
ENSG00000049167	ERCC8	Colon_Transverse1	protein_coding	chr5	0.0685349	3.5e-07	-2.9	0.00941	5:58524622-5:60935451
ENSG00000163749	CCDC158	Pancreas1	protein_coding	chr4	0.11841	6.64e-10	-4.29	0.00938	4:77130707-4:79093979
ENSG00000184445	KNTC1	Brain_Caudate_basal_ganglia1	protein_coding	chr12	0.056444	0.000851149	-3.34	0.00933	12:122009763-12:124976982
ENSG00000143537	ADAM15	Brain_Hypothalamus1	protein_coding	chr1	0.0892402	7.59e-05	-3.78	0.00928	1:154770403-1:156336133
ENSG00000178950	GAK	Brain_Hippocampus1	protein_coding	chr4	0.106261	1.93e-05	2.92	0.00921	4:695146-4:1478711
ENSG00000145214	DGKQ	Brain_Cortex1	protein_coding	chr4	0.0910993	1.09e-05	5.8	0.00918	4:695146-4:1478711
ENSG00000156886	ITGAD	Brain_Cortex1	protein_coding	chr16	0.136999	4.7e-08	-5.16	0.00911	16:29036613-16:31382470
ENSG00000143515	ATP8B2	Brain_Hypothalamus1	protein_coding	chr1	0.0686641	0.000556711	-2.67	0.00911	1:154770403-1:156336133
ENSG00000176681	LRRC37A	Brain_Spinal_cord_cervical_c-11	protein_coding	chr17	0.426441	1.17e-16	-9.17	0.00909	17:43056905-17:45876022
ENSG00000228696	ARL17B	Brain_Spinal_cord_cervical_c-11	protein_coding	chr17	0.390471	5.28e-15	-9.17	0.00909	17:43056905-17:45876022
ENSG00000226816	AC005082.1	Brain_Anterior_cingulate_cortex_BA241	lncRNA	chr7	0.0594997	0.002908	-2.86	0.00907	7:22508611-7:23469560
ENSG00000178222	RNF212	Brain_Substantia_nigra1	protein_coding	chr4	0.0746057	0.00327864	2.97	0.00875	4:695146-4:1478711
ENSG00000178222	RNF212	Brain_Nucleus_accumbens_basal_ganglia1	protein_coding	chr4	0.0641643	0.000275483	2.9	0.00865	4:695146-4:1478711
ENSG00000232759	AC002480.1	Brain_Hippocampus1	lncRNA	chr7	0.0400886	0.00992297	-3.01	0.00857	7:22508611-7:23469560
ENSG00000111011	RSRC2	Whole_Blood1	protein_coding	chr12	0.0313877	3.95e-06	-2.88	0.00855	12:122009763-12:124976982
ENSG00000178222	RNF212	Brain_Hypothalamus1	protein_coding	chr4	0.134039	9.11e-07	2.97	0.00853	4:695146-4:1478711
ENSG00000168993	CPLX1	Pituitary1	protein_coding	chr4	0.215206	4.75e-14	-2.07	0.00838	4:695146-4:1478711
ENSG00000169955	ZNF747	Brain_Cerebellar_Hemisphere1	protein_coding	chr16	0.0319241	0.0179933	1.21	0.00833	16:29036613-16:31382470
ENSG00000273493	AC098479.1	Brain_Nucleus_accumbens_basal_ganglia1	lncRNA	chr3	0.0357998	0.00699941	2.86	0.00831	3:58157850-3:60272829
ENSG00000198648	STK39	Pancreas1	protein_coding	chr2	0.383991	9.75e-34	-2.85	0.00825	2:167356254-2:169968112
ENSG00000178222	RNF212	Brain_Amygdala1	protein_coding	chr4	0.14681	7.4e-06	2.97	0.00822	4:695146-4:1478711
ENSG00000162877	PM20D1	Brain_Caudate_basal_ganglia1	protein_coding	chr1	0.183811	4.47e-10	-1.5	0.00822	1:204681068-1:205922403
ENSG00000178222	RNF212	Brain_Putamen_basal_ganglia1	protein_coding	chr4	0.0777802	0.000230676	2.86	0.00819	4:695146-4:1478711
ENSG00000227057	WDR46	Stomach1	protein_coding	chr6	0.0454834	0.000109465	1.79	0.00818	6:31571337-6:32682664
ENSG00000196126	HLA-DRB1	Pituitary1	protein_coding	chr6	0.330508	3e-22	2.65	0.00809	6:31571337-6:32682664
ENSG00000156858	PRR14	Colon_Sigmoid1	protein_coding	chr16	0.0331618	0.00110667	4.72	0.00805	16:29036613-16:31382470
ENSG00000099365	STX1B	Liver1	protein_coding	chr16	0.0446338	0.00218963	-5.32	0.00804	16:29036613-16:31382470
ENSG00000204351	SKIV2L	Small_Intestine_Terminal_Ileum1	protein_coding	chr6	0.319454	4.49e-16	2.84	0.00798	6:31571337-6:32682664
ENSG00000163357	DCST1	Brain_Caudate_basal_ganglia1	protein_coding	chr1	0.022747	0.0358045	-2.67	0.00794	1:154770403-1:156336133
ENSG00000122550	KLHL7	Brain_Putamen_basal_ganglia1	protein_coding	chr7	0.0868519	9.57e-05	-2.64	0.00792	7:22508611-7:23469560
ENSG00000179195	ZNF664	Brain_Cerebellar_Hemisphere1	protein_coding	chr12	0.0487835	0.00331128	-3.2	0.0079	12:122009763-12:124976982
ENSG00000168993	CPLX1	Small_Intestine_Terminal_Ileum1	protein_coding	chr4	0.243474	4.59e-12	-2.07	0.00789	4:695146-4:1478711
ENSG00000176681	LRRC37A	Brain_Cerebellum1	protein_coding	chr17	0.639676	9.06e-48	-9.17	0.00768	17:43056905-17:45876022
ENSG00000163749	CCDC158	Brain_Spinal_cord_cervical_c-11	protein_coding	chr4	0.198984	1.65e-07	-4.49	0.00764	4:77130707-4:79093979
ENSG00000273133	AC116651.1	Liver1	lncRNA	chr4	0.146655	1.14e-08	2.81	0.00756	4:15147446-4:15926136
ENSG00000132676	DAP3	Pancreas1	protein_coding	chr1	0.0156891	0.0287319	2.17	0.00756	1:154770403-1:156336133
ENSG00000158715	SLC45A3	Brain_Cerebellar_Hemisphere1	protein_coding	chr1	0.0222559	0.0487907	-1.09	0.00754	1:204681068-1:205922403
ENSG00000004468	CD38	Pancreas1	protein_coding	chr4	0.0495597	8.81e-05	-2.82	0.00754	4:15147446-4:15926136
ENSG00000163357	DCST1	Brain_Nucleus_accumbens_basal_ganglia1	protein_coding	chr1	0.0624345	0.000335372	-2.91	0.00753	1:154770403-1:156336133
ENSG00000115866	DARS	Pituitary1	protein_coding	chr2	0.0645552	7.62e-05	-2.82	0.00752	2:135159453-2:137042794
ENSG00000082258	CCNT2	Small_Intestine_Terminal_Ileum1	protein_coding	chr2	0.271798	1.64e-13	2.82	0.00751	2:135159453-2:137042794
ENSG00000176597	B3GNT5	Small_Intestine_Terminal_Ileum1	protein_coding	chr3	0.0236347	0.0428312	2.82	0.0075	3:181511166-3:183769683
ENSG00000232759	AC002480.1	Brain_Amygdala1	lncRNA	chr7	0.0640523	0.00380626	-2.98	0.00747	7:22508611-7:23469560
ENSG00000273493	AC098479.1	Brain_Caudate_basal_ganglia1	lncRNA	chr3	0.0376421	0.0067148	2.81	0.00739	3:58157850-3:60272829
ENSG00000162877	PM20D1	Small_Intestine_Terminal_Ileum1	protein_coding	chr1	0.446386	7.44e-24	-1.1	0.00736	1:204681068-1:205922403
ENSG00000181350	LRRC75A	Brain_Frontal_Cortex_BA91	protein_coding	chr17	0.0889484	6.1e-05	3.11	0.00735	17:15020965-17:16411522
ENSG00000143622	RIT1	Pancreas1	protein_coding	chr1	0.137505	2.24e-11	2.11	0.0073	1:154770403-1:156336133
ENSG00000226816	AC005082.1	Brain_Spinal_cord_cervical_c-11	lncRNA	chr7	0.162357	2.9e-06	-2.66	0.00726	7:22508611-7:23469560
ENSG00000273493	AC098479.1	Brain_Cerebellar_Hemisphere1	lncRNA	chr3	0.0545368	0.00186891	2.82	0.00725	3:58157850-3:60272829
ENSG00000099377	HSD3B7	Colon_Sigmoid1	protein_coding	chr16	0.0658505	3.55e-06	4.2	0.00724	16:29036613-16:31382470
ENSG00000185619	PCGF3	Brain_Nucleus_accumbens_basal_ganglia1	protein_coding	chr4	0.0987171	5.27e-06	-2.43	0.00723	4:695146-4:1478711
ENSG00000167395	ZNF646	Pancreas1	protein_coding	chr16	0.0149886	0.0325674	-4.72	0.00723	16:29036613-16:31382470
ENSG00000226816	AC005082.1	Small_Intestine_Terminal_Ileum1	lncRNA	chr7	0.215122	1.15e-10	-3.55	0.00722	7:22508611-7:23469560
ENSG00000273493	AC098479.1	Brain_Putamen_basal_ganglia1	lncRNA	chr3	0.103498	1.89e-05	2.8	0.00721	3:58157850-3:60272829
ENSG00000196118	CCDC189	Brain_Cerebellar_Hemisphere1	protein_coding	chr16	0.0513377	0.00256827	5.38	0.00719	16:29036613-16:31382470
ENSG00000232949	AC002480.2	Brain_Nucleus_accumbens_basal_ganglia1	lncRNA	chr7	0.0585635	0.000520796	-2.92	0.0071	7:22508611-7:23469560
ENSG00000274678	AC106886.3	Brain_Anterior_cingulate_cortex_BA241	lncRNA	chr16	0.0308852	0.0332405	-4.81	0.00706	16:29036613-16:31382470
ENSG00000273493	AC098479.1	Pituitary1	lncRNA	chr3	0.0814002	8.12e-06	2.8	0.00699	3:58157850-3:60272829
ENSG00000262372	CR936218.1	Spleen1	lncRNA	chr17	0.017056	0.0493878	9.11	0.00692	17:43056905-17:45876022
ENSG00000267097	SLC14A2-AS1	Pituitary1	lncRNA	chr18	0.080164	9.57e-06	2.79	0.0069	18:39892648-18:42921854
ENSG00000179195	ZNF664	Brain_Caudate_basal_ganglia1	protein_coding	chr12	0.0304138	0.0150149	-3.08	0.00685	12:122009763-12:124976982
ENSG00000176597	B3GNT5	Colon_Sigmoid1	protein_coding	chr3	0.0123319	0.0478596	2.93	0.00682	3:181511166-3:183769683
ENSG00000226816	AC005082.1	Stomach1	lncRNA	chr7	0.119962	1.46e-10	-2.52	0.00671	7:22508611-7:23469560
ENSG00000107651	SEC23IP	Brain_Hypothalamus1	protein_coding	chr10	0.0755617	0.000285895	2.78	0.0067	10:120591693-10:122407323
ENSG00000235560	AC002310.1	Colon_Transverse1	lncRNA	chr16	0.0541072	6.51e-06	-2.05	0.00663	16:29036613-16:31382470
ENSG00000103510	KAT8	Brain_Nucleus_accumbens_basal_ganglia1	protein_coding	chr16	0.252309	2.61e-14	-4.67	0.00662	16:29036613-16:31382470
ENSG00000166582	CENPV	Colon_Sigmoid1	protein_coding	chr17	0.241684	9.38e-21	3.87	0.00661	17:15020965-17:16411522
ENSG00000204348	DXO	Brain_Caudate_basal_ganglia1	protein_coding	chr6	0.110234	2.25e-06	2.72	0.0066	6:31571337-6:32682664
ENSG00000151923	TIAL1	Stomach1	protein_coding	chr10	0.0295561	0.00189808	-2.77	0.00652	10:120591693-10:122407323
ENSG00000226816	AC005082.1	Brain_Hippocampus1	lncRNA	chr7	0.122888	3.91e-06	-1.95	0.00645	7:22508611-7:23469560
ENSG00000214401	KANSL1-AS1	Spleen1	lncRNA	chr17	0.517859	1.67e-37	-9.22	0.00645	17:43056905-17:45876022
ENSG00000272588	AC139887.4	Whole_Blood1	lncRNA	chr4	0.0162523	0.000942353	-2.22	0.00637	4:695146-4:1478711
ENSG00000235560	AC002310.1	Pancreas1	lncRNA	chr16	0.0348649	0.00105132	-2.17	0.0063	16:29036613-16:31382470
ENSG00000235560	AC002310.1	Brain_Anterior_cingulate_cortex_BA241	lncRNA	chr16	0.118851	1.9e-05	-2.17	0.00628	16:29036613-16:31382470
ENSG00000197653	DNAH10	Colon_Transverse1	protein_coding	chr12	0.184689	5.67e-18	2.7	0.00627	12:122009763-12:124976982
ENSG00000214401	KANSL1-AS1	Brain_Frontal_Cortex_BA91	lncRNA	chr17	0.63142	2.43e-39	-8.68	0.00626	17:43056905-17:45876022
ENSG00000139719	VPS33A	Brain_Hippocampus1	protein_coding	chr12	0.0971731	4.59e-05	-2.75	0.00621	12:122009763-12:124976982
ENSG00000163687	DNASE1L3	Spleen1	protein_coding	chr3	0.0411726	0.00212417	-2.76	0.0062	3:58157850-3:60272829
ENSG00000119242	CCDC92	Brain_Caudate_basal_ganglia1	protein_coding	chr12	0.0552648	0.00096838	2.86	0.00616	12:122009763-12:124976982
ENSG00000133065	SLC41A1	Brain_Cerebellar_Hemisphere1	protein_coding	chr1	0.0874518	7.09e-05	1.71	0.00614	1:204681068-1:205922403
ENSG00000232759	AC002480.1	Brain_Cerebellar_Hemisphere1	lncRNA	chr7	0.0293655	0.0233609	-2.9	0.00614	7:22508611-7:23469560
ENSG00000133065	SLC41A1	Brain_Spinal_cord_cervical_c-11	protein_coding	chr1	0.110965	0.000138193	1.59	0.00611	1:204681068-1:205922403
ENSG00000118804	STBD1	Spleen1	protein_coding	chr4	0.201305	1.21e-12	3.3	0.0061	4:77130707-4:79093979
ENSG00000048342	CC2D2A	Liver1	protein_coding	chr4	0.0441982	0.00230448	-2.74	0.00609	4:15147446-4:15926136
ENSG00000176681	LRRC37A	Spleen1	protein_coding	chr17	0.552574	3.62e-41	-9.21	0.00604	17:43056905-17:45876022
ENSG00000228696	ARL17B	Spleen1	protein_coding	chr17	0.444921	1.38e-30	-9.21	0.00604	17:43056905-17:45876022
ENSG00000159692	CTBP1	Brain_Putamen_basal_ganglia1	protein_coding	chr4	0.107744	1.24e-05	2.44	0.00597	4:695146-4:1478711
ENSG00000133065	SLC41A1	Brain_Cerebellum1	protein_coding	chr1	0.147617	9.3e-09	1.7	0.00595	1:204681068-1:205922403
ENSG00000122550	KLHL7	Whole_Blood1	protein_coding	chr7	0.0374263	4.51e-07	-4.86	0.00593	7:22508611-7:23469560
ENSG00000273493	AC098479.1	Brain_Hippocampus1	lncRNA	chr3	0.0631293	0.0011328	2.73	0.00591	3:58157850-3:60272829
ENSG00000103510	KAT8	Pancreas1	protein_coding	chr16	0.212471	1.89e-17	-4.68	0.00586	16:29036613-16:31382470
ENSG00000150967	ABCB9	Brain_Nucleus_accumbens_basal_ganglia1	protein_coding	chr12	0.0554347	0.000743291	-2.75	0.00584	12:122009763-12:124976982
ENSG00000163462	TRIM46	Pituitary1	protein_coding	chr1	0.0334234	0.0047511	-3.28	0.00584	1:154770403-1:156336133
ENSG00000165672	PRDX3	Whole_Blood1	protein_coding	chr10	0.0329744	2.24e-06	2.73	0.00584	10:120591693-10:122407323
ENSG00000103510	KAT8	Colon_Sigmoid1	protein_coding	chr16	0.258065	2.88e-22	-4.71	0.00583	16:29036613-16:31382470
ENSG00000165672	PRDX3	Brain_Cerebellar_Hemisphere1	protein_coding	chr10	0.0499045	0.00296171	2.72	0.00582	10:120591693-10:122407323
ENSG00000163749	CCDC158	Brain_Putamen_basal_ganglia1	protein_coding	chr4	0.0696744	0.000504966	-3.45	0.00582	4:77130707-4:79093979
ENSG00000103510	KAT8	Brain_Spinal_cord_cervical_c-11	protein_coding	chr16	0.13613	2.13e-05	-4.68	0.0058	16:29036613-16:31382470
ENSG00000185619	PCGF3	Brain_Hypothalamus1	protein_coding	chr4	0.193468	1.96e-09	-2.36	0.00577	4:695146-4:1478711
ENSG00000033030	ZCCHC8	Whole_Blood1	protein_coding	chr12	0.029088	9.04e-06	2.72	0.00572	12:122009763-12:124976982
ENSG00000225914	TSBP1-AS1	Brain_Putamen_basal_ganglia1	lncRNA	chr6	0.206294	4.94e-10	2.71	0.00567	6:31571337-6:32682664
ENSG00000225914	TSBP1-AS1	Brain_Cortex1	lncRNA	chr6	0.079867	4.03e-05	2.96	0.00565	6:31571337-6:32682664
ENSG00000151923	TIAL1	Spleen1	protein_coding	chr10	0.0309847	0.00785526	-2.71	0.00564	10:120591693-10:122407323
ENSG00000184445	KNTC1	Pancreas1	protein_coding	chr12	0.0327712	0.00149934	-2.88	0.0056	12:122009763-12:124976982
ENSG00000250091	DNAH10OS	Stomach1	lncRNA	chr12	0.0855623	8.2e-08	2.54	0.00553	12:122009763-12:124976982
ENSG00000162877	PM20D1	Liver1	protein_coding	chr1	0.227656	3.19e-13	-1.1	0.00546	1:204681068-1:205922403
ENSG00000011295	TTC19	Brain_Substantia_nigra1	protein_coding	chr17	0.0881825	0.0013349	-3.82	0.00545	17:15020965-17:16411522
ENSG00000177234	LINC01561	Brain_Caudate_basal_ganglia1	lncRNA	chr10	0.150249	2.35e-08	-2.7	0.00543	10:120591693-10:122407323
ENSG00000183605	SFXN4	Liver1	protein_coding	chr10	0.362642	6.5e-22	2.7	0.0054	10:120591693-10:122407323
ENSG00000260911	AC135050.3	Brain_Amygdala1	lncRNA	chr16	0.0858583	0.000751932	-5.04	0.00534	16:29036613-16:31382470
ENSG00000178950	GAK	Brain_Cerebellar_Hemisphere1	protein_coding	chr4	0.13697	4.63e-07	6.99	0.00534	4:695146-4:1478711
ENSG00000078081	LAMP3	Brain_Cerebellum1	protein_coding	chr3	0.0520102	0.000896672	-2.69	0.0053	3:181511166-3:183769683
ENSG00000103510	KAT8	Brain_Putamen_basal_ganglia1	protein_coding	chr16	0.250113	3.82e-12	-4.69	0.00526	16:29036613-16:31382470
ENSG00000049167	ERCC8	Pancreas1	protein_coding	chr5	0.0737207	1.49e-06	-4.62	0.00525	5:58524622-5:60935451
ENSG00000235560	AC002310.1	Brain_Putamen_basal_ganglia1	lncRNA	chr16	0.0503688	0.00325839	-2.21	0.00521	16:29036613-16:31382470
ENSG00000274191	AC026333.4	Colon_Transverse1	lncRNA	chr12	0.0130352	0.0285306	2.71	0.00519	12:122009763-12:124976982
ENSG00000133065	SLC41A1	Brain_Nucleus_accumbens_basal_ganglia1	protein_coding	chr1	0.0463494	0.0020909	1.72	0.00517	1:204681068-1:205922403
ENSG00000232759	AC002480.1	Pituitary1	lncRNA	chr7	0.0554878	0.000253374	-2.81	0.00511	7:22508611-7:23469560
ENSG00000260911	AC135050.3	Small_Intestine_Terminal_Ileum1	lncRNA	chr16	0.264628	3.85e-13	-4.8	0.00508	16:29036613-16:31382470
ENSG00000273493	AC098479.1	Brain_Cerebellum1	lncRNA	chr3	0.0269552	0.0175283	2.68	0.00497	3:58157850-3:60272829
ENSG00000178950	GAK	Small_Intestine_Terminal_Ileum1	protein_coding	chr4	0.109713	8.03e-06	2.97	0.00485	4:695146-4:1478711
ENSG00000235560	AC002310.1	Brain_Hypothalamus1	lncRNA	chr16	0.0506781	0.0031623	-1.61	0.00484	16:29036613-16:31382470
ENSG00000118564	FBXL5	Pancreas1	protein_coding	chr4	0.0135103	0.042511	-2.65	0.00481	4:15147446-4:15926136
ENSG00000099377	HSD3B7	Pituitary1	protein_coding	chr16	0.29393	1.65e-19	3.07	0.00478	16:29036613-16:31382470
ENSG00000233799	AC139887.1	Spleen1	lncRNA	chr4	0.0278976	0.0117243	-1.18	0.00476	4:695146-4:1478711
ENSG00000167394	ZNF668	Stomach1	protein_coding	chr16	0.0275786	0.00271296	4.95	0.00475	16:29036613-16:31382470
ENSG00000133065	SLC41A1	Brain_Caudate_basal_ganglia1	protein_coding	chr1	0.0421073	0.00410145	1.91	0.00474	1:204681068-1:205922403
ENSG00000139697	SBNO1	Colon_Sigmoid1	protein_coding	chr12	0.0717092	1.26e-06	2.64	0.00473	12:122009763-12:124976982
ENSG00000197653	DNAH10	Small_Intestine_Terminal_Ileum1	protein_coding	chr12	0.11007	7.75e-06	2.64	0.00469	12:122009763-12:124976982
ENSG00000273133	AC116651.1	Spleen1	lncRNA	chr4	0.191483	4.92e-12	2.64	0.00468	4:15147446-4:15926136
ENSG00000234745	HLA-B	Brain_Frontal_Cortex_BA91	protein_coding	chr6	0.221509	4.95e-11	3.46	0.00466	6:31571337-6:32682664
ENSG00000133065	SLC41A1	Small_Intestine_Terminal_Ileum1	protein_coding	chr1	0.0417967	0.00681024	1.4	0.00465	1:204681068-1:205922403
ENSG00000165672	PRDX3	Colon_Transverse1	protein_coding	chr10	0.0269405	0.00158089	2.63	0.0046	10:120591693-10:122407323
ENSG00000158711	ELK4	Stomach1	protein_coding	chr1	0.0421973	0.000196834	-2.88	0.00453	1:204681068-1:205922403
ENSG00000120088	CRHR1	Brain_Putamen_basal_ganglia1	protein_coding	chr17	0.0751953	0.000296205	8.86	0.00452	17:43056905-17:45876022
ENSG00000278133	AC135050.6	Spleen1	lncRNA	chr16	0.0603609	0.000185019	4.24	0.00452	16:29036613-16:31382470
ENSG00000156858	PRR14	Pituitary1	protein_coding	chr16	0.0414232	0.00163426	4.31	0.00451	16:29036613-16:31382470
ENSG00000078081	LAMP3	Brain_Hypothalamus1	protein_coding	chr3	0.0638328	0.000887484	-2.62	0.00449	3:181511166-3:183769683
ENSG00000278133	AC135050.6	Brain_Spinal_cord_cervical_c-11	lncRNA	chr16	0.0474034	0.014324	4.61	0.00447	16:29036613-16:31382470
ENSG00000179195	ZNF664	Brain_Cerebellum1	protein_coding	chr12	0.056406	0.000535036	-2.75	0.00446	12:122009763-12:124976982
ENSG00000244161	FLNB-AS1	Whole_Blood1	lncRNA	chr3	0.0137716	0.00234672	-2.61	0.00446	3:58157850-3:60272829
ENSG00000197653	DNAH10	Spleen1	protein_coding	chr12	0.17603	4.31e-11	2.62	0.00444	12:122009763-12:124976982
ENSG00000185619	PCGF3	Brain_Amygdala1	protein_coding	chr4	0.182837	4.32e-07	-2.14	0.00442	4:695146-4:1478711
ENSG00000260911	AC135050.3	Brain_Cortex1	lncRNA	chr16	0.151478	8.05e-09	-4.94	0.00442	16:29036613-16:31382470
ENSG00000237765	FAM200B	Small_Intestine_Terminal_Ileum1	protein_coding	chr4	0.0761242	0.000228696	2.63	0.00442	4:15147446-4:15926136
ENSG00000227782	AC002553.1	Colon_Transverse1	lncRNA	chr17	0.0210495	0.00529526	3.72	0.00438	17:15020965-17:16411522
ENSG00000168297	PXK	Pituitary1	protein_coding	chr3	0.262138	3.08e-17	-2.63	0.00438	3:58157850-3:60272829
ENSG00000103496	STX4	Brain_Cerebellar_Hemisphere1	protein_coding	chr16	0.0339033	0.0147187	-5.39	0.00436	16:29036613-16:31382470
ENSG00000167395	ZNF646	Brain_Cerebellar_Hemisphere1	protein_coding	chr16	0.0529616	0.00218547	-5.39	0.00436	16:29036613-16:31382470
ENSG00000176681	LRRC37A	Colon_Sigmoid1	protein_coding	chr17	0.562587	1.09e-58	-9.17	0.00435	17:43056905-17:45876022
ENSG00000139719	VPS33A	Colon_Sigmoid1	protein_coding	chr12	0.0746125	7.57e-07	2.66	0.00431	12:122009763-12:124976982
ENSG00000163686	ABHD6	Small_Intestine_Terminal_Ileum1	protein_coding	chr3	0.0676723	0.000527058	-2.63	0.00429	3:58157850-3:60272829
ENSG00000177234	LINC01561	Brain_Amygdala1	lncRNA	chr10	0.0737289	0.00185401	-2.6	0.00427	10:120591693-10:122407323
ENSG00000005844	ITGAL	Whole_Blood1	protein_coding	chr16	0.0127338	0.00344687	-2.71	0.00427	16:29036613-16:31382470
ENSG00000150967	ABCB9	Brain_Hippocampus1	protein_coding	chr12	0.0305103	0.0248372	-2.6	0.00425	12:122009763-12:124976982
ENSG00000228696	ARL17B	Brain_Cerebellar_Hemisphere1	protein_coding	chr17	0.45372	1.73e-24	-9.17	0.00421	17:43056905-17:45876022
ENSG00000197653	DNAH10	Brain_Caudate_basal_ganglia1	protein_coding	chr12	0.0693535	0.000207219	2.94	0.0042	12:122009763-12:124976982
ENSG00000167394	ZNF668	Brain_Frontal_Cortex_BA91	protein_coding	chr16	0.0332145	0.0157831	4.95	0.00418	16:29036613-16:31382470
ENSG00000232748	AC135050.1	Brain_Frontal_Cortex_BA91	lncRNA	chr16	0.0412009	0.00705927	4.95	0.00418	16:29036613-16:31382470
ENSG00000150967	ABCB9	Colon_Sigmoid1	protein_coding	chr12	0.0993966	9.07e-09	-2.62	0.00418	12:122009763-12:124976982
ENSG00000167394	ZNF668	Brain_Cortex1	protein_coding	chr16	0.0326148	0.00956236	4.95	0.00415	16:29036613-16:31382470
ENSG00000111325	OGFOD2	Brain_Nucleus_accumbens_basal_ganglia1	protein_coding	chr12	0.0337091	0.00890889	-2.63	0.00414	12:122009763-12:124976982
ENSG00000133065	SLC41A1	Liver1	protein_coding	chr1	0.118117	3.73e-07	1.43	0.00412	1:204681068-1:205922403
ENSG00000225190	PLEKHM1	Stomach1	protein_coding	chr17	0.0320032	0.00122164	-8.31	0.00408	17:43056905-17:45876022
ENSG00000118804	STBD1	Small_Intestine_Terminal_Ileum1	protein_coding	chr4	0.0292221	0.024115	3.26	0.00406	4:77130707-4:79093979
ENSG00000281406	BLACAT1	Pituitary1	protein_coding	chr1	0.0273599	0.010755	2.75	0.00403	1:204681068-1:205922403
ENSG00000150967	ABCB9	Small_Intestine_Terminal_Ileum1	protein_coding	chr12	0.215475	1.11e-10	-2.58	0.00402	12:122009763-12:124976982
ENSG00000177234	LINC01561	Brain_Cortex1	lncRNA	chr10	0.0874664	1.67e-05	-2.58	0.004	10:120591693-10:122407323
ENSG00000204351	SKIV2L	Brain_Cerebellum1	protein_coding	chr6	0.418546	3.61e-26	2.52	0.00399	6:31571337-6:32682664
ENSG00000177234	LINC01561	Brain_Hippocampus1	lncRNA	chr10	0.113119	1e-05	-2.58	0.00399	10:120591693-10:122407323
ENSG00000232759	AC002480.1	Pancreas1	lncRNA	chr7	0.0847323	2.28e-07	-2.71	0.00399	7:22508611-7:23469560
ENSG00000169955	ZNF747	Brain_Anterior_cingulate_cortex_BA241	protein_coding	chr16	0.0505829	0.00616739	-4.24	0.00389	16:29036613-16:31382470
ENSG00000103510	KAT8	Small_Intestine_Terminal_Ileum1	protein_coding	chr16	0.188982	2.05e-09	-4.74	0.00388	16:29036613-16:31382470
ENSG00000158104	HPD	Small_Intestine_Terminal_Ileum1	protein_coding	chr12	0.0362817	0.0118173	2.56	0.00381	12:122009763-12:124976982
ENSG00000122550	KLHL7	Brain_Spinal_cord_cervical_c-11	protein_coding	chr7	0.0659191	0.00370708	-3.17	0.00378	7:22508611-7:23469560
ENSG00000136068	FLNB	Whole_Blood1	protein_coding	chr3	0.16248	1.45e-27	2.56	0.00376	3:58157850-3:60272829
ENSG00000158711	ELK4	Colon_Sigmoid1	protein_coding	chr1	0.0327317	0.00119394	-2.84	0.00375	1:204681068-1:205922403
ENSG00000150967	ABCB9	Brain_Cortex1	protein_coding	chr12	0.0443487	0.00243879	-2.61	0.00374	12:122009763-12:124976982
ENSG00000179195	ZNF664	Brain_Anterior_cingulate_cortex_BA241	protein_coding	chr12	0.0591766	0.00298817	-2.45	0.00372	12:122009763-12:124976982
ENSG00000178226	PRSS36	Spleen1	protein_coding	chr16	0.0214792	0.027254	-4.22	0.00372	16:29036613-16:31382470
ENSG00000049167	ERCC8	Brain_Caudate_basal_ganglia1	protein_coding	chr5	0.0596168	0.000601517	-2.6	0.0037	5:58524622-5:60935451
ENSG00000004468	CD38	Colon_Transverse1	protein_coding	chr4	0.0524707	9.06e-06	-2.55	0.00369	4:15147446-4:15926136
ENSG00000139726	DENR	Pituitary1	protein_coding	chr12	0.0217656	0.0231071	-2.57	0.00368	12:122009763-12:124976982
ENSG00000118804	STBD1	Brain_Nucleus_accumbens_basal_ganglia1	protein_coding	chr4	0.215921	3.25e-12	1.71	0.00367	4:77130707-4:79093979
ENSG00000118804	STBD1	Brain_Spinal_cord_cervical_c-11	protein_coding	chr4	0.126585	4.34e-05	-0.138	0.00365	4:77130707-4:79093979
ENSG00000232093	DCST1-AS1	Brain_Hypothalamus1	lncRNA	chr1	0.0315828	0.0204212	-1.62	0.00364	1:154770403-1:156336133
ENSG00000232629	HLA-DQB2	Spleen1	protein_coding	chr6	0.632035	9.49e-51	2.46	0.0036	6:31571337-6:32682664
ENSG00000178222	RNF212	Whole_Blood1	protein_coding	chr4	0.0238306	6.01e-05	-0.744	0.0036	4:695146-4:1478711
ENSG00000172992	DCAKD	Colon_Sigmoid1	protein_coding	chr17	0.413524	1.68e-38	-3.01	0.00358	17:43056905-17:45876022
ENSG00000244161	FLNB-AS1	Brain_Hypothalamus1	lncRNA	chr3	0.095139	4.27e-05	-2.55	0.00357	3:58157850-3:60272829
ENSG00000232093	DCST1-AS1	Brain_Spinal_cord_cervical_c-11	lncRNA	chr1	0.0630643	0.00456267	-0.9	0.00357	1:154770403-1:156336133
ENSG00000232759	AC002480.1	Brain_Anterior_cingulate_cortex_BA241	lncRNA	chr7	0.0963621	0.000129972	-2.75	0.00356	7:22508611-7:23469560
ENSG00000169241	SLC50A1	Brain_Cerebellar_Hemisphere1	protein_coding	chr1	0.0302629	0.0213127	-3.28	0.00356	1:154770403-1:156336133
ENSG00000162877	PM20D1	Colon_Sigmoid1	protein_coding	chr1	0.266601	4.56e-23	-0.852	0.00356	1:204681068-1:205922403
ENSG00000103510	KAT8	Whole_Blood1	protein_coding	chr16	0.0433655	5.33e-08	-4.71	0.00356	16:29036613-16:31382470
ENSG00000169241	SLC50A1	Brain_Substantia_nigra1	protein_coding	chr1	0.0371057	0.0400421	-3.28	0.00353	1:154770403-1:156336133
ENSG00000214941	ZSWIM7	Brain_Cerebellum1	protein_coding	chr17	0.425497	1.03e-26	-3.61	0.00352	17:15020965-17:16411522
ENSG00000175193	PARL	Brain_Hippocampus1	protein_coding	chr3	0.0297507	0.0267337	2.53	0.00352	3:181511166-3:183769683
ENSG00000150967	ABCB9	Spleen1	protein_coding	chr12	0.0551556	0.000358456	-2.52	0.00352	12:122009763-12:124976982
ENSG00000178950	GAK	Brain_Anterior_cingulate_cortex_BA241	protein_coding	chr4	0.112279	3.35e-05	6.09	0.00351	4:695146-4:1478711
ENSG00000139722	VPS37B	Colon_Sigmoid1	protein_coding	chr12	0.0472459	9.32e-05	-2.55	0.0035	12:122009763-12:124976982
ENSG00000162877	PM20D1	Brain_Anterior_cingulate_cortex_BA241	protein_coding	chr1	0.221286	1.83e-09	-1.81	0.00347	1:204681068-1:205922403
ENSG00000069275	NUCKS1	Brain_Hippocampus1	protein_coding	chr1	0.0381449	0.0119387	-3.5	0.00347	1:204681068-1:205922403
ENSG00000170425	ADORA2B	Brain_Hypothalamus1	protein_coding	chr17	0.131595	1.16e-06	3.71	0.00346	17:15020965-17:16411522
ENSG00000122550	KLHL7	Spleen1	protein_coding	chr7	0.0613139	0.000163914	-3.38	0.00344	7:22508611-7:23469560
ENSG00000156860	FBRS	Colon_Transverse1	protein_coding	chr16	0.0108452	0.0458915	3.06	0.00343	16:29036613-16:31382470
ENSG00000242686	AC107464.1	Brain_Hypothalamus1	lncRNA	chr4	0.576466	3.67e-33	-1.25	0.00342	4:695146-4:1478711
ENSG00000261124	AC135050.4	Brain_Cerebellar_Hemisphere1	lncRNA	chr16	0.0407277	0.00740214	-0.018	0.00338	16:29036613-16:31382470
ENSG00000249592	AC139887.2	Brain_Cortex1	lncRNA	chr4	0.0354037	0.00689814	1.35	0.00338	4:695146-4:1478711
ENSG00000136068	FLNB	Brain_Spinal_cord_cervical_c-11	protein_coding	chr3	0.105886	0.000200862	2.51	0.00337	3:58157850-3:60272829
ENSG00000150967	ABCB9	Colon_Transverse1	protein_coding	chr12	0.109551	7.4e-11	-2.49	0.00337	12:122009763-12:124976982
ENSG00000226816	AC005082.1	Liver1	lncRNA	chr7	0.100711	3e-06	-3.34	0.00334	7:22508611-7:23469560
ENSG00000228696	ARL17B	Colon_Transverse1	protein_coding	chr17	0.447644	4.16e-49	4.57	0.00326	17:43056905-17:45876022
ENSG00000162877	PM20D1	Stomach1	protein_coding	chr1	0.456025	1.76e-44	-0.605	0.00326	1:204681068-1:205922403
ENSG00000244731	C4A	Whole_Blood1	protein_coding	chr6	0.252998	2.99e-44	-2.49	0.00326	6:31571337-6:32682664
ENSG00000163945	UVSSA	Stomach1	protein_coding	chr4	0.535135	1.67e-55	-0.103	0.00325	4:695146-4:1478711
ENSG00000169231	THBS3	Whole_Blood1	protein_coding	chr1	0.379457	3.05e-71	-2.49	0.00324	1:154770403-1:156336133
ENSG00000151006	PRSS53	Brain_Amygdala1	protein_coding	chr16	0.0362955	0.0305714	4.92	0.00323	16:29036613-16:31382470
ENSG00000188906	LRRK2	Brain_Frontal_Cortex_BA91	protein_coding	chr12	0.066009	0.000598702	2.49	0.00323	12:39227446-12:40816185
ENSG00000163749	CCDC158	Brain_Frontal_Cortex_BA91	protein_coding	chr4	0.214962	1.04e-10	-3.5	0.00323	4:77130707-4:79093979
ENSG00000163354	DCST2	Pituitary1	protein_coding	chr1	0.250497	1.98e-16	-2.34	0.00323	1:154770403-1:156336133
ENSG00000188906	LRRK2	Brain_Anterior_cingulate_cortex_BA241	protein_coding	chr12	0.0331439	0.0273191	2.49	0.00322	12:39227446-12:40816185
ENSG00000272217	AL645940.1	Brain_Spinal_cord_cervical_c-11	lncRNA	chr6	0.0738086	0.00208904	3.12	0.00322	6:31571337-6:32682664
ENSG00000204351	SKIV2L	Liver1	protein_coding	chr6	0.0259893	0.0200049	2.49	0.00322	6:31571337-6:32682664
ENSG00000108433	GOSR2	Colon_Transverse1	protein_coding	chr17	0.0907214	3.73e-09	4.47	0.00321	17:43056905-17:45876022
ENSG00000204344	STK19	Brain_Cerebellum1	protein_coding	chr6	0.305709	3.94e-18	2.47	0.0032	6:31571337-6:32682664
ENSG00000275265	AC127002.2	Pituitary1	lncRNA	chr12	0.0278903	0.0100092	2.52	0.00319	12:122009763-12:124976982
ENSG00000163354	DCST2	Brain_Nucleus_accumbens_basal_ganglia1	protein_coding	chr1	0.322177	1.27e-18	-2.39	0.00318	1:154770403-1:156336133
ENSG00000237649	KIFC1	Liver1	protein_coding	chr6	0.0369078	0.0054367	-2.48	0.00317	6:31571337-6:32682664
ENSG00000158711	ELK4	Spleen1	protein_coding	chr1	0.0620518	0.000149237	-2.7	0.00316	1:204681068-1:205922403
ENSG00000125459	MSTO1	Brain_Cerebellar_Hemisphere1	protein_coding	chr1	0.248234	2.28e-12	0.957	0.00315	1:154770403-1:156336133
ENSG00000166582	CENPV	Spleen1	protein_coding	chr17	0.123673	5.21e-08	3.87	0.00315	17:15020965-17:16411522
ENSG00000232949	AC002480.2	Pituitary1	lncRNA	chr7	0.0163581	0.0492232	-2.67	0.00314	7:22508611-7:23469560
ENSG00000169020	ATP5ME	Liver1	protein_coding	chr4	0.0731372	7.79e-05	2.47	0.00313	4:695146-4:1478711
ENSG00000166582	CENPV	Whole_Blood1	protein_coding	chr17	0.0884957	3.71e-15	4.06	0.00311	17:15020965-17:16411522
ENSG00000188906	LRRK2	Brain_Cerebellar_Hemisphere1	protein_coding	chr12	0.0429814	0.00590702	2.48	0.0031	12:39227446-12:40816185
ENSG00000119242	CCDC92	Brain_Cerebellar_Hemisphere1	protein_coding	chr12	0.0542585	0.00192129	2.54	0.0031	12:122009763-12:124976982
ENSG00000169951	ZNF764	Liver1	protein_coding	chr16	0.0447994	0.00214751	4.09	0.0031	16:29036613-16:31382470
ENSG00000163687	DNASE1L3	Whole_Blood1	protein_coding	chr3	0.0129041	0.00323572	-2.48	0.0031	3:58157850-3:60272829
ENSG00000138771	SHROOM3	Liver1	protein_coding	chr4	0.0771989	4.84e-05	-2.58	0.00309	4:77130707-4:79093979
ENSG00000049167	ERCC8	Pituitary1	protein_coding	chr5	0.0958805	1.16e-06	-3.25	0.00308	5:58524622-5:60935451
ENSG00000188906	LRRK2	Brain_Cortex1	protein_coding	chr12	0.0543622	0.000767161	2.47	0.00307	12:39227446-12:40816185
ENSG00000250091	DNAH10OS	Brain_Hippocampus1	lncRNA	chr12	0.0412106	0.00892021	2.47	0.00307	12:122009763-12:124976982
ENSG00000150967	ABCB9	Pancreas1	protein_coding	chr12	0.0630006	9.13e-06	-2.66	0.00306	12:122009763-12:124976982
ENSG00000160685	ZBTB7B	Brain_Nucleus_accumbens_basal_ganglia1	protein_coding	chr1	0.0296778	0.0142218	2.55	0.00304	1:154770403-1:156336133
ENSG00000232629	HLA-DQB2	Liver1	protein_coding	chr6	0.416751	6.53e-26	2.46	0.00303	6:31571337-6:32682664
ENSG00000196735	HLA-DQA1	Brain_Nucleus_accumbens_basal_ganglia1	protein_coding	chr6	0.139221	4.53e-08	-2.46	0.00302	6:31571337-6:32682664
ENSG00000185619	PCGF3	Brain_Cortex1	protein_coding	chr4	0.276554	5.64e-16	-2.14	0.00301	4:695146-4:1478711
ENSG00000143622	RIT1	Brain_Putamen_basal_ganglia1	protein_coding	chr1	0.0327492	0.0181937	2.46	0.00301	1:154770403-1:156336133
ENSG00000120088	CRHR1	Brain_Spinal_cord_cervical_c-11	protein_coding	chr17	0.0852991	0.000905504	8.99	0.00301	17:43056905-17:45876022
ENSG00000188906	LRRK2	Brain_Amygdala1	protein_coding	chr12	0.0660754	0.00327466	2.46	0.003	12:39227446-12:40816185
ENSG00000078070	MCCC1	Colon_Sigmoid1	protein_coding	chr3	0.0657332	3.63e-06	0.627	0.003	3:181511166-3:183769683
ENSG00000133065	SLC41A1	Colon_Transverse1	protein_coding	chr1	0.0538673	6.84e-06	1.53	0.003	1:204681068-1:205922403
ENSG00000213658	LAT	Pancreas1	protein_coding	chr16	0.0633881	8.55e-06	2.93	0.00298	16:29036613-16:31382470
ENSG00000108474	PIGL	Liver1	protein_coding	chr17	0.0464123	0.00177742	3.75	0.00297	17:15020965-17:16411522
ENSG00000151893	CACUL1	Brain_Spinal_cord_cervical_c-11	protein_coding	chr10	0.0460999	0.0157651	2.44	0.00295	10:120591693-10:122407323
ENSG00000163354	DCST2	Liver1	protein_coding	chr1	0.0306079	0.0114877	2.47	0.00294	1:154770403-1:156336133
ENSG00000108474	PIGL	Small_Intestine_Terminal_Ileum1	protein_coding	chr17	0.0414983	0.00701567	3.71	0.00294	17:15020965-17:16411522
ENSG00000163872	YEATS2	Brain_Cerebellum1	protein_coding	chr3	0.112136	7.2e-07	2.45	0.00291	3:181511166-3:183769683
ENSG00000165672	PRDX3	Brain_Spinal_cord_cervical_c-11	protein_coding	chr10	0.0432138	0.0195037	2.43	0.00291	10:120591693-10:122407323
ENSG00000004468	CD38	Liver1	protein_coding	chr4	0.0722933	8.6e-05	-2.45	0.0029	4:15147446-4:15926136
ENSG00000177234	LINC01561	Brain_Nucleus_accumbens_basal_ganglia1	lncRNA	chr10	0.0741738	8.81e-05	-2.44	0.00289	10:120591693-10:122407323
ENSG00000244731	C4A	Brain_Amygdala1	protein_coding	chr6	0.280481	1.09e-10	-2.45	0.00288	6:31571337-6:32682664
ENSG00000178950	GAK	Colon_Sigmoid1	protein_coding	chr4	0.253607	7.49e-22	1.21	0.00288	4:695146-4:1478711
ENSG00000119242	CCDC92	Stomach1	protein_coding	chr12	0.0994405	6.52e-09	2.32	0.00288	12:122009763-12:124976982
ENSG00000234745	HLA-B	Brain_Amygdala1	protein_coding	chr6	0.138657	1.39e-05	2.44	0.00287	6:31571337-6:32682664
ENSG00000167395	ZNF646	Small_Intestine_Terminal_Ileum1	protein_coding	chr16	0.0979194	2.62e-05	-4.66	0.00287	16:29036613-16:31382470
ENSG00000103510	KAT8	Brain_Hippocampus1	protein_coding	chr16	0.211674	5.06e-10	-4.68	0.00286	16:29036613-16:31382470
ENSG00000214941	ZSWIM7	Brain_Cerebellar_Hemisphere1	protein_coding	chr17	0.33488	4.97e-17	-2.6	0.00284	17:15020965-17:16411522
ENSG00000185619	PCGF3	Brain_Anterior_cingulate_cortex_BA241	protein_coding	chr4	0.208542	6.11e-09	-2.83	0.00283	4:695146-4:1478711
ENSG00000156858	PRR14	Stomach1	protein_coding	chr16	0.018859	0.0133579	4.71	0.00283	16:29036613-16:31382470
ENSG00000099385	BCL7C	Pancreas1	protein_coding	chr16	0.0291511	0.00277568	-4.49	0.00282	16:29036613-16:31382470
ENSG00000130787	HIP1R	Brain_Spinal_cord_cervical_c-11	protein_coding	chr12	0.0592845	0.00600813	-2.43	0.0028	12:122009763-12:124976982
ENSG00000073969	NSF	Colon_Transverse1	protein_coding	chr17	0.0665803	5.21e-07	-4.37	0.0028	17:43056905-17:45876022
ENSG00000234745	HLA-B	Brain_Caudate_basal_ganglia1	protein_coding	chr6	0.190425	2.01e-10	2.45	0.00275	6:31571337-6:32682664
ENSG00000127415	IDUA	Liver1	protein_coding	chr4	0.0492277	0.00127808	-2.64	0.00275	4:695146-4:1478711
ENSG00000260911	AC135050.3	Brain_Substantia_nigra1	lncRNA	chr16	0.190289	1.23e-06	-5.05	0.00274	16:29036613-16:31382470
ENSG00000249592	AC139887.2	Stomach1	lncRNA	chr4	0.0796358	2.4e-07	0.00494	0.00272	4:695146-4:1478711
ENSG00000250091	DNAH10OS	Small_Intestine_Terminal_Ileum1	lncRNA	chr12	0.118663	3.25e-06	2.41	0.00271	12:122009763-12:124976982
ENSG00000162877	PM20D1	Pancreas1	protein_coding	chr1	0.486749	8.53e-46	-0.712	0.0027	1:204681068-1:205922403
ENSG00000273493	AC098479.1	Brain_Anterior_cingulate_cortex_BA241	lncRNA	chr3	0.050983	0.00596235	2.42	0.00269	3:58157850-3:60272829
ENSG00000188906	LRRK2	Brain_Cerebellum1	protein_coding	chr12	0.0438044	0.00235518	2.41	0.00266	12:39227446-12:40816185
ENSG00000235560	AC002310.1	Stomach1	lncRNA	chr16	0.070017	1.36e-06	-2.24	0.00265	16:29036613-16:31382470
ENSG00000163354	DCST2	Brain_Putamen_basal_ganglia1	protein_coding	chr1	0.313161	2.14e-15	-2.4	0.00264	1:154770403-1:156336133
ENSG00000136243	NUPL2	Colon_Sigmoid1	protein_coding	chr7	0.135217	1.29e-11	-0.999	0.00264	7:22508611-7:23469560
ENSG00000160753	RUSC1	Brain_Putamen_basal_ganglia1	protein_coding	chr1	0.0306141	0.0224825	-2.4	0.00263	1:154770403-1:156336133
ENSG00000204420	MPIG6B	Small_Intestine_Terminal_Ileum1	protein_coding	chr6	0.0320625	0.0180749	2.39	0.00262	6:31571337-6:32682664
ENSG00000185619	PCGF3	Brain_Substantia_nigra1	protein_coding	chr4	0.230992	6.23e-08	-2.52	0.0026	4:695146-4:1478711
ENSG00000167395	ZNF646	Liver1	protein_coding	chr16	0.186703	7.18e-11	-5.08	0.0026	16:29036613-16:31382470
ENSG00000136243	NUPL2	Brain_Cerebellum1	protein_coding	chr7	0.454518	4.67e-29	3.26	0.00256	7:22508611-7:23469560
ENSG00000247775	SNCA-AS1	Brain_Nucleus_accumbens_basal_ganglia1	lncRNA	chr4	0.0738118	9.18e-05	1.94	0.00255	4:90231746-4:91560677
ENSG00000073969	NSF	Liver1	protein_coding	chr17	0.0432997	0.00256088	-4.82	0.00255	17:43056905-17:45876022
ENSG00000260911	AC135050.3	Brain_Cerebellar_Hemisphere1	lncRNA	chr16	0.238779	6.86e-12	-5.27	0.00254	16:29036613-16:31382470
ENSG00000130787	HIP1R	Brain_Hypothalamus1	protein_coding	chr12	0.0742795	0.000323628	-2.39	0.00254	12:122009763-12:124976982
ENSG00000168301	KCTD6	Colon_Sigmoid1	protein_coding	chr3	0.0125972	0.0455093	-2.41	0.00254	3:58157850-3:60272829
ENSG00000278133	AC135050.6	Brain_Nucleus_accumbens_basal_ganglia1	lncRNA	chr16	0.0585894	0.000519264	4.42	0.00253	16:29036613-16:31382470
ENSG00000188906	LRRK2	Brain_Putamen_basal_ganglia1	protein_coding	chr12	0.063634	0.000904671	1.37	0.00253	12:39227446-12:40816185
ENSG00000162877	PM20D1	Spleen1	protein_coding	chr1	0.531677	6.27e-39	-0.428	0.00253	1:204681068-1:205922403
ENSG00000143537	ADAM15	Brain_Caudate_basal_ganglia1	protein_coding	chr1	0.160798	6.87e-09	-2.26	0.0025	1:154770403-1:156336133
ENSG00000136235	GPNMB	Colon_Transverse1	protein_coding	chr7	0.030884	0.000708764	3.16	0.0025	7:22508611-7:23469560
ENSG00000103502	CDIPT	Small_Intestine_Terminal_Ileum1	protein_coding	chr16	0.0369967	0.0109997	-2.82	0.0025	16:29036613-16:31382470
ENSG00000250312	ZNF718	Whole_Blood1	protein_coding	chr4	0.326203	2.88e-59	-1.82	0.0025	4:695146-4:1478711
ENSG00000232949	AC002480.2	Brain_Hippocampus1	lncRNA	chr7	0.0745639	0.000387305	-2.45	0.00248	7:22508611-7:23469560
ENSG00000177234	LINC01561	Brain_Putamen_basal_ganglia1	lncRNA	chr10	0.0438806	0.00611446	-2.38	0.00247	10:120591693-10:122407323
ENSG00000235560	AC002310.1	Liver1	lncRNA	chr16	0.0881744	1.33e-05	-2.36	0.00246	16:29036613-16:31382470
ENSG00000275413	AC002553.2	Stomach1	lncRNA	chr17	0.0420091	0.000203562	-3.63	0.00246	17:15020965-17:16411522
ENSG00000167397	VKORC1	Liver1	protein_coding	chr16	0.520342	1.05e-34	-5.06	0.00244	16:29036613-16:31382470
ENSG00000232949	AC002480.2	Brain_Amygdala1	lncRNA	chr7	0.0712645	0.00222668	-2.52	0.00243	7:22508611-7:23469560
ENSG00000163545	NUAK2	Brain_Cerebellar_Hemisphere1	protein_coding	chr1	0.108573	8.48e-06	2.36	0.00242	1:204681068-1:205922403
ENSG00000197653	DNAH10	Brain_Putamen_basal_ganglia1	protein_coding	chr12	0.0542417	0.0022404	2.56	0.00242	12:122009763-12:124976982
ENSG00000160685	ZBTB7B	Brain_Caudate_basal_ganglia1	protein_coding	chr1	0.0429649	0.00373189	2.38	0.00241	1:154770403-1:156336133
ENSG00000162877	PM20D1	Brain_Nucleus_accumbens_basal_ganglia1	protein_coding	chr1	0.248654	4.27e-14	-0.873	0.00241	1:204681068-1:205922403
ENSG00000158113	LRRC43	Pancreas1	protein_coding	chr12	0.0600913	1.49e-05	2.16	0.00241	12:122009763-12:124976982
ENSG00000162877	PM20D1	Brain_Cortex1	protein_coding	chr1	0.104522	2.26e-06	-1.62	0.0024	1:204681068-1:205922403
ENSG00000204356	NELFE	Spleen1	protein_coding	chr6	0.0263247	0.0143944	-2.33	0.0024	6:31571337-6:32682664
ENSG00000120071	KANSL1	Pancreas1	protein_coding	chr17	0.119262	5.71e-10	7.1	0.00239	17:43056905-17:45876022
ENSG00000273582	AC009093.5	Liver1	lncRNA	chr16	0.399754	1.28e-24	2.04	0.00238	16:29036613-16:31382470
ENSG00000184445	KNTC1	Brain_Cerebellar_Hemisphere1	protein_coding	chr12	0.0570907	0.00145037	-3.24	0.00237	12:122009763-12:124976982
ENSG00000158715	SLC45A3	Brain_Hypothalamus1	protein_coding	chr1	0.0617607	0.00108395	-0.1	0.00237	1:204681068-1:205922403
ENSG00000264589	MAPT-AS1	Brain_Nucleus_accumbens_basal_ganglia1	lncRNA	chr17	0.351509	1.46e-20	8.69	0.00237	17:43056905-17:45876022
ENSG00000232759	AC002480.1	Colon_Sigmoid1	lncRNA	chr7	0.0439762	0.000165343	-2.37	0.00237	7:22508611-7:23469560
ENSG00000162877	PM20D1	Colon_Transverse1	protein_coding	chr1	0.425394	5.87e-46	-1.1	0.00237	1:204681068-1:205922403
ENSG00000225190	PLEKHM1	Pituitary1	protein_coding	chr17	0.0758392	1.7e-05	-8.1	0.00236	17:43056905-17:45876022
ENSG00000247775	SNCA-AS1	Brain_Spinal_cord_cervical_c-11	lncRNA	chr4	0.115066	0.000102088	1.11	0.00235	4:90231746-4:91560677
ENSG00000168306	ACOX2	Spleen1	protein_coding	chr3	0.190195	5.9e-12	-2.33	0.00235	3:58157850-3:60272829
ENSG00000174792	ODAPH	Brain_Anterior_cingulate_cortex_BA241	protein_coding	chr4	0.13237	5.91e-06	-3.42	0.00234	4:77130707-4:79093979
ENSG00000235560	AC002310.1	Brain_Cerebellum1	lncRNA	chr16	0.0556233	0.000586546	-2.21	0.00234	16:29036613-16:31382470
ENSG00000204348	DXO	Brain_Cerebellum1	protein_coding	chr6	0.150485	6.5e-09	2.36	0.00234	6:31571337-6:32682664
ENSG00000185619	PCGF3	Brain_Frontal_Cortex_BA91	protein_coding	chr4	0.265407	3e-13	-2.78	0.00234	4:695146-4:1478711
ENSG00000103510	KAT8	Brain_Hypothalamus1	protein_coding	chr16	0.22512	6.31e-11	-4.69	0.00234	16:29036613-16:31382470
ENSG00000275389	AC068790.9	Colon_Sigmoid1	lncRNA	chr12	0.0360997	0.000659456	-2.28	0.00234	12:122009763-12:124976982
ENSG00000275426	AC253576.2	Colon_Transverse1	lncRNA	chr4	0.351095	2.98e-36	1.24	0.00234	4:695146-4:1478711
ENSG00000108379	WNT3	Colon_Sigmoid1	protein_coding	chr17	0.184779	9.86e-16	-8.8	0.00233	17:43056905-17:45876022
ENSG00000166582	CENPV	Pancreas1	protein_coding	chr17	0.136972	2.46e-11	3.23	0.00233	17:15020965-17:16411522
ENSG00000204290	BTNL2	Small_Intestine_Terminal_Ileum1	protein_coding	chr6	0.204323	3.82e-10	-2.32	0.00233	6:31571337-6:32682664
ENSG00000168291	PDHB	Brain_Frontal_Cortex_BA91	protein_coding	chr3	0.253269	1.27e-12	-2.35	0.00232	3:58157850-3:60272829
ENSG00000119242	CCDC92	Brain_Hypothalamus1	protein_coding	chr12	0.0361872	0.0129653	2.35	0.00232	12:122009763-12:124976982
ENSG00000011295	TTC19	Liver1	protein_coding	chr17	0.172622	4.36e-10	-3.65	0.00232	17:15020965-17:16411522
ENSG00000125459	MSTO1	Pituitary1	protein_coding	chr1	0.0461669	0.000870695	0.872	0.00232	1:154770403-1:156336133
ENSG00000238083	LRRC37A2	Brain_Frontal_Cortex_BA91	protein_coding	chr17	0.701871	2.48e-47	-6.74	0.0023	17:43056905-17:45876022
ENSG00000278133	AC135050.6	Brain_Hippocampus1	lncRNA	chr16	0.0369487	0.0133813	4.61	0.0023	16:29036613-16:31382470
ENSG00000160789	LMNA	Pituitary1	protein_coding	chr1	0.0304058	0.00712626	2.4	0.0023	1:154770403-1:156336133
ENSG00000168291	PDHB	Brain_Amygdala1	protein_coding	chr3	0.219162	2.21e-08	-2.35	0.00229	3:58157850-3:60272829
ENSG00000103549	RNF40	Brain_Caudate_basal_ganglia1	protein_coding	chr16	0.150054	2.41e-08	-3.78	0.00229	16:29036613-16:31382470
ENSG00000244731	C4A	Brain_Caudate_basal_ganglia1	protein_coding	chr6	0.312203	2.53e-17	-2.36	0.00229	6:31571337-6:32682664
ENSG00000168291	PDHB	Brain_Anterior_cingulate_cortex_BA241	protein_coding	chr3	0.195219	2.12e-08	-2.35	0.00228	3:58157850-3:60272829
ENSG00000250091	DNAH10OS	Brain_Cortex1	lncRNA	chr12	0.166849	1.2e-09	2.29	0.00227	12:122009763-12:124976982
ENSG00000139722	VPS37B	Spleen1	protein_coding	chr12	0.0438436	0.00151088	-2.33	0.00225	12:122009763-12:124976982
ENSG00000204396	VWA7	Brain_Frontal_Cortex_BA91	protein_coding	chr6	0.127589	1.22e-06	-2.48	0.00223	6:31571337-6:32682664
ENSG00000261346	AC116348.3	Small_Intestine_Terminal_Ileum1	lncRNA	chr16	0.0434567	0.00577335	-2.57	0.00223	16:29036613-16:31382470
ENSG00000185829	ARL17A	Colon_Transverse1	protein_coding	chr17	0.448073	3.61e-49	4.06	0.00222	17:43056905-17:45876022
ENSG00000143622	RIT1	Small_Intestine_Terminal_Ileum1	protein_coding	chr1	0.106231	1.14e-05	2.33	0.00222	1:154770403-1:156336133
ENSG00000099381	SETD1A	Brain_Cerebellar_Hemisphere1	protein_coding	chr16	0.0520684	0.00238832	-5.24	0.00219	16:29036613-16:31382470
ENSG00000198825	INPP5F	Brain_Cerebellar_Hemisphere1	protein_coding	chr10	0.0512688	0.0025859	-2.32	0.00218	10:120591693-10:122407323
ENSG00000204344	STK19	Pancreas1	protein_coding	chr6	0.151788	1.7e-12	2.32	0.00217	6:31571337-6:32682664
ENSG00000272721	AC131235.2	Brain_Nucleus_accumbens_basal_ganglia1	lncRNA	chr3	0.0196902	0.046389	-2.73	0.00216	3:181511166-3:183769683
ENSG00000133065	SLC41A1	Brain_Amygdala1	protein_coding	chr1	0.0676434	0.00291436	2.01	0.00215	1:204681068-1:205922403
ENSG00000227782	AC002553.1	Spleen1	lncRNA	chr17	0.0250443	0.017022	3.76	0.00215	17:15020965-17:16411522
ENSG00000069275	NUCKS1	Whole_Blood1	protein_coding	chr1	0.0718629	1.72e-12	-3.01	0.00215	1:204681068-1:205922403
ENSG00000165672	PRDX3	Brain_Nucleus_accumbens_basal_ganglia1	protein_coding	chr10	0.043839	0.00278458	2.3	0.00214	10:120591693-10:122407323
ENSG00000143537	ADAM15	Brain_Nucleus_accumbens_basal_ganglia1	protein_coding	chr1	0.124078	2.73e-07	-2.33	0.00214	1:154770403-1:156336133
ENSG00000138750	NUP54	Brain_Putamen_basal_ganglia1	protein_coding	chr4	0.242243	9.32e-12	-0.736	0.00214	4:77130707-4:79093979
ENSG00000203805	PLPP4	Colon_Sigmoid1	protein_coding	chr10	0.0436119	0.000176251	2.31	0.00214	10:120591693-10:122407323
ENSG00000033030	ZCCHC8	Colon_Transverse1	protein_coding	chr12	0.0111458	0.0429681	1.82	0.00214	12:122009763-12:124976982
ENSG00000224389	C4B	Stomach1	protein_coding	chr6	0.0369557	0.000502484	-2.71	0.00214	6:31571337-6:32682664
ENSG00000167397	VKORC1	Spleen1	protein_coding	chr16	0.0924168	3.07e-06	4.09	0.00213	16:29036613-16:31382470
ENSG00000127419	TMEM175	Brain_Frontal_Cortex_BA91	protein_coding	chr4	0.160592	3.9e-08	-5.65	0.00212	4:695146-4:1478711
ENSG00000177234	LINC01561	Brain_Substantia_nigra1	lncRNA	chr10	0.0410142	0.0307006	-2.31	0.00212	10:120591693-10:122407323
ENSG00000119242	CCDC92	Small_Intestine_Terminal_Ileum1	protein_coding	chr12	0.170053	1.57e-08	2.3	0.00212	12:122009763-12:124976982
ENSG00000127418	FGFRL1	Brain_Anterior_cingulate_cortex_BA241	protein_coding	chr4	0.0506483	0.00613339	-0.273	0.0021	4:695146-4:1478711
ENSG00000169241	SLC50A1	Brain_Caudate_basal_ganglia1	protein_coding	chr1	0.0435408	0.00350271	-2.64	0.0021	1:154770403-1:156336133
ENSG00000170315	UBB	Brain_Hypothalamus1	protein_coding	chr17	0.0460399	0.00495722	2.77	0.0021	17:15020965-17:16411522
ENSG00000225342	AC079630.1	Liver1	lncRNA	chr12	0.149996	7.51e-09	2.31	0.0021	12:39227446-12:40816185
ENSG00000188906	LRRK2	Liver1	protein_coding	chr12	0.313346	1.5e-18	2.3	0.00208	12:39227446-12:40816185
ENSG00000204348	DXO	Brain_Cortex1	protein_coding	chr6	0.0613173	0.000344043	2.61	0.00206	6:31571337-6:32682664
ENSG00000136243	NUPL2	Colon_Transverse1	protein_coding	chr7	0.174519	5.64e-17	1.46	0.00206	7:22508611-7:23469560
ENSG00000188906	LRRK2	Brain_Hippocampus1	protein_coding	chr12	0.102499	2.76e-05	1.63	0.00204	12:39227446-12:40816185
ENSG00000163357	DCST1	Brain_Cerebellar_Hemisphere1	protein_coding	chr1	0.170549	1.35e-08	-2.37	0.00203	1:154770403-1:156336133
ENSG00000127419	TMEM175	Brain_Cortex1	protein_coding	chr4	0.137569	4.39e-08	-5.93	0.00203	4:695146-4:1478711
ENSG00000178226	PRSS36	Brain_Nucleus_accumbens_basal_ganglia1	protein_coding	chr16	0.39973	6.05e-24	-4.32	0.00203	16:29036613-16:31382470
ENSG00000181350	LRRC75A	Brain_Caudate_basal_ganglia1	protein_coding	chr17	0.050886	0.00156413	2.9	0.00202	17:15020965-17:16411522
ENSG00000272308	AC104113.1	Brain_Cortex1	lncRNA	chr5	0.0241252	0.0261619	-4.16	0.00202	5:58524622-5:60935451
ENSG00000178950	GAK	Colon_Transverse1	protein_coding	chr4	0.049579	1.62e-05	2.32	0.00202	4:695146-4:1478711
ENSG00000138760	SCARB2	Stomach1	protein_coding	chr4	0.0277291	0.00264009	-1.14	0.00202	4:77130707-4:79093979
ENSG00000125459	MSTO1	Brain_Cortex1	protein_coding	chr1	0.0318725	0.0104335	0.926	0.00201	1:154770403-1:156336133
ENSG00000169231	THBS3	Colon_Transverse1	protein_coding	chr1	0.24453	4.32e-24	-2.29	0.00201	1:154770403-1:156336133
ENSG00000181350	LRRC75A	Brain_Cerebellum1	protein_coding	chr17	0.0401694	0.00361793	2.74	0.002	17:15020965-17:16411522
ENSG00000099381	SETD1A	Stomach1	protein_coding	chr16	0.0373015	0.00047232	-4.48	0.00198	16:29036613-16:31382470
ENSG00000235560	AC002310.1	Whole_Blood1	lncRNA	chr16	0.0613532	7.98e-11	-1.9	0.00198	16:29036613-16:31382470
ENSG00000143622	RIT1	Colon_Transverse1	protein_coding	chr1	0.130686	8.39e-13	2.26	0.00197	1:154770403-1:156336133
ENSG00000163357	DCST1	Brain_Cerebellum1	protein_coding	chr1	0.128063	1.04e-07	-2.36	0.00196	1:154770403-1:156336133
ENSG00000168291	PDHB	Brain_Cerebellum1	protein_coding	chr3	0.214867	1.57e-12	-2.28	0.00196	3:58157850-3:60272829
ENSG00000090238	YPEL3	Small_Intestine_Terminal_Ileum1	protein_coding	chr16	0.269377	2.19e-13	-2.27	0.00196	16:29036613-16:31382470
ENSG00000103510	KAT8	Stomach1	protein_coding	chr16	0.292169	5.63e-26	-4.71	0.00196	16:29036613-16:31382470
ENSG00000238083	LRRC37A2	Brain_Cerebellum1	protein_coding	chr17	0.698662	7.99e-56	-9	0.00195	17:43056905-17:45876022
ENSG00000273493	AC098479.1	Brain_Hypothalamus1	lncRNA	chr3	0.0389879	0.00985299	2.28	0.00195	3:58157850-3:60272829
ENSG00000213676	ATF6B	Brain_Nucleus_accumbens_basal_ganglia1	protein_coding	chr6	0.122825	3.17e-07	-2.27	0.00194	6:31571337-6:32682664
ENSG00000232629	HLA-DQB2	Pituitary1	protein_coding	chr6	0.601847	6.77e-49	-2.38	0.00194	6:31571337-6:32682664
ENSG00000273133	AC116651.1	Colon_Sigmoid1	lncRNA	chr4	0.149231	9.28e-13	2.27	0.00193	4:15147446-4:15926136
ENSG00000188906	LRRK2	Whole_Blood1	protein_coding	chr12	0.135593	6.07e-23	-0.279	0.00193	12:39227446-12:40816185
ENSG00000099365	STX1B	Whole_Blood1	protein_coding	chr16	0.0232799	7.33e-05	3.32	0.00193	16:29036613-16:31382470
ENSG00000069275	NUCKS1	Brain_Cerebellar_Hemisphere1	protein_coding	chr1	0.0382165	0.00952458	-3.16	0.00192	1:204681068-1:205922403
ENSG00000133065	SLC41A1	Brain_Cortex1	protein_coding	chr1	0.076018	6.3e-05	1.89	0.00192	1:204681068-1:205922403
ENSG00000197653	DNAH10	Brain_Frontal_Cortex_BA91	protein_coding	chr12	0.0645153	0.000694336	2.23	0.00192	12:122009763-12:124976982
ENSG00000258144	LINC02406	Brain_Hypothalamus1	lncRNA	chr12	0.0800466	0.000185232	2.27	0.00192	12:39227446-12:40816185
ENSG00000273002	AL355388.2	Colon_Transverse1	lncRNA	chr1	0.0329546	0.000465781	-2.26	0.00192	1:154770403-1:156336133
ENSG00000168291	PDHB	Colon_Sigmoid1	protein_coding	chr3	0.17003	1.75e-14	2.29	0.00191	3:58157850-3:60272829
ENSG00000069275	NUCKS1	Small_Intestine_Terminal_Ileum1	protein_coding	chr1	0.0296176	0.0231634	-1.59	0.00191	1:204681068-1:205922403
ENSG00000163354	DCST2	Brain_Cerebellum1	protein_coding	chr1	0.362415	5.37e-22	-2.25	0.0019	1:154770403-1:156336133
ENSG00000162873	KLHDC8A	Brain_Substantia_nigra1	protein_coding	chr1	0.034979	0.046315	2.23	0.0019	1:204681068-1:205922403
ENSG00000175193	PARL	Colon_Transverse1	protein_coding	chr3	0.0140067	0.023171	2.5	0.0019	3:181511166-3:183769683
ENSG00000103510	KAT8	Brain_Caudate_basal_ganglia1	protein_coding	chr16	0.204582	3.57e-11	-4.68	0.00188	16:29036613-16:31382470
ENSG00000163354	DCST2	Brain_Hippocampus1	protein_coding	chr1	0.101913	2.92e-05	-2.13	0.00188	1:154770403-1:156336133
ENSG00000178226	PRSS36	Brain_Spinal_cord_cervical_c-11	protein_coding	chr16	0.046826	0.014945	-4.37	0.00188	16:29036613-16:31382470
ENSG00000139726	DENR	Colon_Sigmoid1	protein_coding	chr12	0.0303521	0.00181829	-2.15	0.00188	12:122009763-12:124976982
ENSG00000103472	RRN3P2	Whole_Blood1	lncRNA	chr16	0.125394	3.17e-21	2.07	0.00188	16:29036613-16:31382470
ENSG00000204351	SKIV2L	Brain_Frontal_Cortex_BA91	protein_coding	chr6	0.353378	4.22e-18	1.83	0.00185	6:31571337-6:32682664
ENSG00000103549	RNF40	Brain_Anterior_cingulate_cortex_BA241	protein_coding	chr16	0.0628183	0.00219951	-3.57	0.00184	16:29036613-16:31382470
ENSG00000185619	PCGF3	Brain_Hippocampus1	protein_coding	chr4	0.348276	7.34e-17	-2.51	0.00184	4:695146-4:1478711
ENSG00000229809	ZNF688	Small_Intestine_Terminal_Ileum1	protein_coding	chr16	0.0890583	6.34e-05	3.09	0.00184	16:29036613-16:31382470
ENSG00000179195	ZNF664	Brain_Putamen_basal_ganglia1	protein_coding	chr12	0.0282434	0.0284776	-2.41	0.00183	12:122009763-12:124976982
ENSG00000183605	SFXN4	Colon_Transverse1	protein_coding	chr10	0.640465	2.61e-83	2.24	0.00183	10:120591693-10:122407323
ENSG00000272360	AC116036.2	Colon_Transverse1	lncRNA	chr3	0.0821941	2.16e-08	-2.25	0.00183	3:58157850-3:60272829
ENSG00000198563	DDX39B	Brain_Hippocampus1	protein_coding	chr6	0.0270043	0.03493	2.21	0.00182	6:31571337-6:32682664
ENSG00000183605	SFXN4	Brain_Substantia_nigra1	protein_coding	chr10	0.485068	7.72e-18	2.22	0.00181	10:120591693-10:122407323
ENSG00000242252	BGLAP	Colon_Transverse1	protein_coding	chr1	0.0909582	3.55e-09	2.24	0.00181	1:154770403-1:156336133
ENSG00000267288	AC138150.2	Pituitary1	lncRNA	chr17	0.115677	7.91e-08	-2.43	0.0018	17:43056905-17:45876022
ENSG00000168297	PXK	Brain_Cerebellum1	protein_coding	chr3	0.330821	8.38e-20	-2.12	0.00179	3:58157850-3:60272829
ENSG00000175193	PARL	Brain_Cortex1	protein_coding	chr3	0.0213438	0.0365995	2.52	0.00179	3:181511166-3:183769683
ENSG00000168291	PDHB	Brain_Cortex1	protein_coding	chr3	0.288342	1.04e-16	-2.23	0.00178	3:58157850-3:60272829
ENSG00000183605	SFXN4	Brain_Nucleus_accumbens_basal_ganglia1	protein_coding	chr10	0.526096	2.87e-34	2.21	0.00178	10:120591693-10:122407323
ENSG00000168291	PDHB	Brain_Cerebellar_Hemisphere1	protein_coding	chr3	0.431509	5.56e-23	-2.24	0.00177	3:58157850-3:60272829
ENSG00000168297	PXK	Brain_Cerebellar_Hemisphere1	protein_coding	chr3	0.379788	1.1e-19	-2.2	0.00176	3:58157850-3:60272829
ENSG00000143622	RIT1	Colon_Sigmoid1	protein_coding	chr1	0.0716979	1.27e-06	2.22	0.00176	1:154770403-1:156336133
ENSG00000103472	RRN3P2	Brain_Caudate_basal_ganglia1	lncRNA	chr16	0.0918264	1.75e-05	2.01	0.00175	16:29036613-16:31382470
ENSG00000250091	DNAH10OS	Pituitary1	lncRNA	chr12	0.0514346	0.000433307	2.22	0.00175	12:122009763-12:124976982
ENSG00000118804	STBD1	Brain_Cortex1	protein_coding	chr4	0.189085	7.27e-11	2.18	0.00174	4:77130707-4:79093979
ENSG00000168291	PDHB	Pancreas1	protein_coding	chr3	0.046223	0.000154542	-2.22	0.00174	3:58157850-3:60272829
ENSG00000186868	MAPT	Brain_Cerebellum1	protein_coding	chr17	0.0684396	0.00013013	7.03	0.00173	17:43056905-17:45876022
ENSG00000262766	AC135050.5	Brain_Cortex1	lncRNA	chr16	0.0361414	0.0063287	-0.743	0.00173	16:29036613-16:31382470
ENSG00000250091	DNAH10OS	Colon_Transverse1	lncRNA	chr12	0.180205	1.57e-17	2.13	0.00173	12:122009763-12:124976982
ENSG00000183605	SFXN4	Stomach1	protein_coding	chr10	0.533354	3.09e-55	2.22	0.00173	10:120591693-10:122407323
ENSG00000183605	SFXN4	Whole_Blood1	protein_coding	chr10	0.337902	8.16e-62	2.22	0.00173	10:120591693-10:122407323
ENSG00000183605	SFXN4	Brain_Amygdala1	protein_coding	chr10	0.536305	6.13e-23	2.22	0.00172	10:120591693-10:122407323
ENSG00000260060	AC009088.1	Brain_Cerebellar_Hemisphere1	lncRNA	chr16	0.0246139	0.0381333	-2.98	0.00171	16:29036613-16:31382470
ENSG00000130787	HIP1R	Brain_Frontal_Cortex_BA91	protein_coding	chr12	0.0435955	0.00555526	-2.2	0.00171	12:122009763-12:124976982
ENSG00000168993	CPLX1	Colon_Sigmoid1	protein_coding	chr4	0.200066	4.77e-17	-1.43	0.00171	4:695146-4:1478711
ENSG00000163354	DCST2	Small_Intestine_Terminal_Ileum1	protein_coding	chr1	0.0538104	0.0020702	-2.21	0.00171	1:154770403-1:156336133
ENSG00000138760	SCARB2	Brain_Caudate_basal_ganglia1	protein_coding	chr4	0.110318	2.23e-06	2.06	0.0017	4:77130707-4:79093979
ENSG00000183605	SFXN4	Pancreas1	protein_coding	chr10	0.46464	5.19e-43	2.21	0.00169	10:120591693-10:122407323
ENSG00000186834	HEXIM1	Brain_Anterior_cingulate_cortex_BA241	protein_coding	chr17	0.0338996	0.0255897	-2.43	0.00168	17:43056905-17:45876022
ENSG00000182903	ZNF721	Brain_Cerebellar_Hemisphere1	protein_coding	chr4	0.112684	5.59e-06	1.03	0.00167	4:695146-4:1478711
ENSG00000170425	ADORA2B	Brain_Hippocampus1	protein_coding	chr17	0.0729083	0.000452474	3.99	0.00167	17:15020965-17:16411522
ENSG00000127418	FGFRL1	Brain_Substantia_nigra1	protein_coding	chr4	0.0641234	0.00656042	1.5	0.00167	4:695146-4:1478711
ENSG00000204351	SKIV2L	Brain_Substantia_nigra1	protein_coding	chr6	0.206033	3.93e-07	2.2	0.00167	6:31571337-6:32682664
ENSG00000256546	AC156455.1	Small_Intestine_Terminal_Ileum1	lncRNA	chr12	0.0730191	0.000310855	-2.18	0.00167	12:122009763-12:124976982
ENSG00000213676	ATF6B	Small_Intestine_Terminal_Ileum1	protein_coding	chr6	0.0988861	2.38e-05	-2.19	0.00167	6:31571337-6:32682664
ENSG00000185619	PCGF3	Stomach1	protein_coding	chr4	0.555559	1.18e-58	-1.8	0.00167	4:695146-4:1478711
ENSG00000260852	FBXL19-AS1	Liver1	lncRNA	chr16	0.0291087	0.0137444	4.8	0.00166	16:29036613-16:31382470
ENSG00000073969	NSF	Brain_Nucleus_accumbens_basal_ganglia1	protein_coding	chr17	0.0456748	0.00225813	-4.21	0.00165	17:43056905-17:45876022
ENSG00000160803	UBQLN4	Brain_Putamen_basal_ganglia1	protein_coding	chr1	0.0939853	4.78e-05	2.2	0.00165	1:154770403-1:156336133
ENSG00000169288	MRPL1	Brain_Putamen_basal_ganglia1	protein_coding	chr4	0.0706096	0.00046136	1.85	0.00165	4:77130707-4:79093979
ENSG00000183605	SFXN4	Colon_Sigmoid1	protein_coding	chr10	0.668967	7.55e-78	2.2	0.00165	10:120591693-10:122407323
ENSG00000130787	HIP1R	Brain_Substantia_nigra1	protein_coding	chr12	0.0911778	0.00109446	-2.2	0.00164	12:122009763-12:124976982
ENSG00000196126	HLA-DRB1	Brain_Cortex1	protein_coding	chr6	0.393496	8.03e-24	1.01	0.00163	6:31571337-6:32682664
ENSG00000168291	PDHB	Brain_Hypothalamus1	protein_coding	chr3	0.154568	1.14e-07	-2.19	0.00162	3:58157850-3:60272829
ENSG00000150967	ABCB9	Whole_Blood1	protein_coding	chr12	0.0315568	3.72e-06	-2.19	0.00162	12:122009763-12:124976982
ENSG00000239704	CDRT4	Whole_Blood1	protein_coding	chr17	0.173404	1.75e-29	2.27	0.00161	17:15020965-17:16411522
ENSG00000138750	NUP54	Brain_Hippocampus1	protein_coding	chr4	0.266984	1.21e-12	-2.25	0.0016	4:77130707-4:79093979
ENSG00000163545	NUAK2	Brain_Hypothalamus1	protein_coding	chr1	0.0412533	0.00789732	2.15	0.0016	1:204681068-1:205922403
ENSG00000163888	CAMK2N2	Brain_Spinal_cord_cervical_c-11	protein_coding	chr3	0.0423001	0.0208667	-2.11	0.0016	3:181511166-3:183769683
ENSG00000151503	NCAPD3	Small_Intestine_Terminal_Ileum1	protein_coding	chr11	0.197292	8.29e-10	-1.89	0.0016	11:133000260-11:134205993
ENSG00000235560	AC002310.1	Spleen1	lncRNA	chr16	0.159639	4.14e-10	-2.1	0.0016	16:29036613-16:31382470
ENSG00000204410	MSH5	Brain_Cortex1	protein_coding	chr6	0.0199864	0.0431818	-1.97	0.00159	6:31571337-6:32682664
ENSG00000158955	WNT9B	Brain_Frontal_Cortex_BA91	protein_coding	chr17	0.0374264	0.0103128	-1.62	0.00159	17:43056905-17:45876022
ENSG00000168291	PDHB	Brain_Hippocampus1	protein_coding	chr3	0.18857	5.63e-09	-2.18	0.00159	3:58157850-3:60272829
ENSG00000183605	SFXN4	Brain_Putamen_basal_ganglia1	protein_coding	chr10	0.54415	1.82e-30	2.17	0.00159	10:120591693-10:122407323
ENSG00000104219	ZDHHC2	Small_Intestine_Terminal_Ileum1	protein_coding	chr8	0.112798	5.88e-06	2.18	0.00159	8:15991660-8:17387624
ENSG00000166582	CENPV	Brain_Frontal_Cortex_BA91	protein_coding	chr17	0.381148	9.12e-20	3.24	0.00158	17:15020965-17:16411522
ENSG00000167371	PRRT2	Brain_Hypothalamus1	protein_coding	chr16	0.0782253	0.000220952	-2.12	0.00158	16:29036613-16:31382470
ENSG00000035499	DEPDC1B	Brain_Spinal_cord_cervical_c-11	protein_coding	chr5	0.190256	3.3e-07	2.23	0.00158	5:58524622-5:60935451
ENSG00000103549	RNF40	Pituitary1	protein_coding	chr16	0.0807554	8.84e-06	-3.74	0.00158	16:29036613-16:31382470
ENSG00000138744	NAAA	Spleen1	protein_coding	chr4	0.279511	9.56e-18	-1.9	0.00158	4:77130707-4:79093979
ENSG00000033030	ZCCHC8	Stomach1	protein_coding	chr12	0.0218665	0.00767366	1.57	0.00158	12:122009763-12:124976982
ENSG00000103472	RRN3P2	Stomach1	lncRNA	chr16	0.130862	1.88e-11	2	0.00158	16:29036613-16:31382470
ENSG00000168297	PXK	Whole_Blood1	protein_coding	chr3	0.147605	5.43e-25	-2.19	0.00158	3:58157850-3:60272829
ENSG00000102886	GDPD3	Colon_Sigmoid1	protein_coding	chr16	0.0836254	1.53e-07	1.81	0.00157	16:29036613-16:31382470
ENSG00000119242	CCDC92	Liver1	protein_coding	chr12	0.0885614	1.27e-05	2.1	0.00157	12:122009763-12:124976982
ENSG00000203805	PLPP4	Brain_Cerebellum1	protein_coding	chr10	0.611735	2.11e-44	2.17	0.00156	10:120591693-10:122407323
ENSG00000272927	AC107464.3	Colon_Sigmoid1	lncRNA	chr4	0.013939	0.0353395	-2.12	0.00156	4:695146-4:1478711
ENSG00000249592	AC139887.2	Small_Intestine_Terminal_Ileum1	lncRNA	chr4	0.0466494	0.00420493	-1.49	0.00156	4:695146-4:1478711
ENSG00000270720	AC104785.1	Brain_Cerebellar_Hemisphere1	lncRNA	chr4	0.144655	2.08e-07	-1.78	0.00155	4:90231746-4:91560677
ENSG00000198825	INPP5F	Brain_Cerebellum1	protein_coding	chr10	0.0738412	6.89e-05	-2.17	0.00155	10:120591693-10:122407323
ENSG00000163354	DCST2	Brain_Frontal_Cortex_BA91	protein_coding	chr1	0.286865	2.22e-14	-2.23	0.00155	1:154770403-1:156336133
ENSG00000198648	STK39	Brain_Spinal_cord_cervical_c-11	protein_coding	chr2	0.0683068	0.00311627	-2.17	0.00155	2:167356254-2:169968112
ENSG00000232093	DCST1-AS1	Colon_Sigmoid1	lncRNA	chr1	0.0159856	0.0241445	-2.17	0.00155	1:154770403-1:156336133
ENSG00000069275	NUCKS1	Pituitary1	protein_coding	chr1	0.0575846	0.000191962	-3.53	0.00155	1:204681068-1:205922403
ENSG00000183605	SFXN4	Spleen1	protein_coding	chr10	0.64921	4.32e-53	2.17	0.00155	10:120591693-10:122407323
ENSG00000145217	SLC26A1	Brain_Cerebellar_Hemisphere1	protein_coding	chr4	0.393525	1.56e-20	5.18	0.00154	4:695146-4:1478711
ENSG00000114770	ABCC5	Brain_Frontal_Cortex_BA91	protein_coding	chr3	0.187178	2.24e-09	2.36	0.00154	3:181511166-3:183769683
ENSG00000120071	KANSL1	Spleen1	protein_coding	chr17	0.366775	4.12e-24	-4.42	0.00154	17:43056905-17:45876022
ENSG00000273002	AL355388.2	Whole_Blood1	lncRNA	chr1	0.0952662	2.96e-16	-2.16	0.00154	1:154770403-1:156336133
ENSG00000138772	ANXA3	Small_Intestine_Terminal_Ileum1	protein_coding	chr4	0.0486183	0.00345962	-2.11	0.00153	4:77130707-4:79093979
ENSG00000108379	WNT3	Brain_Cerebellum1	protein_coding	chr17	0.366818	2.61e-22	-1.17	0.00152	17:43056905-17:45876022
ENSG00000163545	NUAK2	Brain_Nucleus_accumbens_basal_ganglia1	protein_coding	chr1	0.0342602	0.00835945	2.11	0.00152	1:204681068-1:205922403
ENSG00000275389	AC068790.9	Stomach1	lncRNA	chr12	0.0250053	0.00432648	-2.05	0.00152	12:122009763-12:124976982
ENSG00000184047	DIABLO	Brain_Cerebellum1	protein_coding	chr12	0.0273786	0.016653	1.81	0.00151	12:122009763-12:124976982
ENSG00000115839	RAB3GAP1	Colon_Transverse1	protein_coding	chr2	0.0309701	0.000696488	-2.24	0.00151	2:135159453-2:137042794
ENSG00000183605	SFXN4	Small_Intestine_Terminal_Ileum1	protein_coding	chr10	0.638251	7.99e-40	2.15	0.00151	10:120591693-10:122407323
ENSG00000261367	AC012645.2	Brain_Cerebellum1	lncRNA	chr16	0.267887	1.02e-15	2.76	0.0015	16:29036613-16:31382470
ENSG00000143590	EFNA3	Brain_Cerebellum1	protein_coding	chr1	0.0338304	0.00767853	1.85	0.0015	1:154770403-1:156336133
ENSG00000273582	AC009093.5	Brain_Spinal_cord_cervical_c-11	lncRNA	chr16	0.167422	1.96e-06	1.9	0.00149	16:29036613-16:31382470
ENSG00000185619	PCGF3	Brain_Spinal_cord_cervical_c-11	protein_coding	chr4	0.387154	7.43e-15	-2.84	0.00149	4:695146-4:1478711
ENSG00000224043	CCNT2-AS1	Colon_Sigmoid1	lncRNA	chr2	0.0138777	0.0357481	-2.14	0.00149	2:135159453-2:137042794
ENSG00000166582	CENPV	Colon_Transverse1	protein_coding	chr17	0.130265	9.18e-13	3.31	0.00149	17:15020965-17:16411522
ENSG00000139722	VPS37B	Brain_Cortex1	protein_coding	chr12	0.0193707	0.0465638	-2.11	0.00148	12:122009763-12:124976982
ENSG00000183605	SFXN4	Brain_Frontal_Cortex_BA91	protein_coding	chr10	0.569215	1.85e-33	2.14	0.00148	10:120591693-10:122407323
ENSG00000183605	SFXN4	Brain_Hypothalamus1	protein_coding	chr10	0.548276	8.44e-31	2.14	0.00148	10:120591693-10:122407323
ENSG00000274191	AC026333.4	Pituitary1	lncRNA	chr12	0.0610599	0.000121161	-2.18	0.00148	12:122009763-12:124976982
ENSG00000196126	HLA-DRB1	Small_Intestine_Terminal_Ileum1	protein_coding	chr6	0.255781	1.09e-12	2.11	0.00148	6:31571337-6:32682664
ENSG00000178226	PRSS36	Brain_Hippocampus1	protein_coding	chr16	0.215981	3.21e-10	-4.46	0.00147	16:29036613-16:31382470
ENSG00000103472	RRN3P2	Brain_Spinal_cord_cervical_c-11	lncRNA	chr16	0.337257	1.02e-12	1.89	0.00147	16:29036613-16:31382470
ENSG00000174938	SEZ6L2	Colon_Transverse1	protein_coding	chr16	0.014754	0.0197624	-2.34	0.00147	16:29036613-16:31382470
ENSG00000174938	SEZ6L2	Small_Intestine_Terminal_Ileum1	protein_coding	chr16	0.0422656	0.00649958	-2.34	0.00147	16:29036613-16:31382470
ENSG00000168291	PDHB	Spleen1	protein_coding	chr3	0.108016	4.07e-07	2.14	0.00147	3:58157850-3:60272829
ENSG00000130787	HIP1R	Brain_Anterior_cingulate_cortex_BA241	protein_coding	chr12	0.0783797	0.000593989	-2.12	0.00146	12:122009763-12:124976982
ENSG00000234494	SP2-AS1	Brain_Hippocampus1	lncRNA	chr17	0.0646378	0.000983312	2.17	0.00146	17:43056905-17:45876022
ENSG00000004468	CD38	Stomach1	protein_coding	chr4	0.0793308	2.54e-07	-1.92	0.00146	4:15147446-4:15926136
ENSG00000130787	HIP1R	Whole_Blood1	protein_coding	chr12	0.0411004	1.2e-07	-2.14	0.00146	12:122009763-12:124976982
ENSG00000183605	SFXN4	Brain_Caudate_basal_ganglia1	protein_coding	chr10	0.550957	3.21e-35	2.12	0.00145	10:120591693-10:122407323
ENSG00000163354	DCST2	Brain_Caudate_basal_ganglia1	protein_coding	chr1	0.184797	3.97e-10	-2.2	0.00145	1:154770403-1:156336133
ENSG00000069275	NUCKS1	Brain_Nucleus_accumbens_basal_ganglia1	protein_coding	chr1	0.030215	0.0133593	-3.64	0.00145	1:204681068-1:205922403
ENSG00000198825	INPP5F	Colon_Transverse1	protein_coding	chr10	0.0164311	0.0138633	2.1	0.00145	10:120591693-10:122407323
ENSG00000120071	KANSL1	Liver1	protein_coding	chr17	0.159816	2.2e-09	2.95	0.00145	17:43056905-17:45876022
ENSG00000120071	KANSL1	Pituitary1	protein_coding	chr17	0.421234	9.89e-30	-8.13	0.00145	17:43056905-17:45876022
ENSG00000169242	EFNA1	Whole_Blood1	protein_coding	chr1	0.016463	0.000872392	2.13	0.00145	1:154770403-1:156336133
ENSG00000163354	DCST2	Brain_Amygdala1	protein_coding	chr1	0.112386	0.000102947	-2.25	0.00143	1:154770403-1:156336133
ENSG00000163749	CCDC158	Brain_Hypothalamus1	protein_coding	chr4	0.091413	6.14e-05	-3.54	0.00143	4:77130707-4:79093979
ENSG00000232810	TNF	Pituitary1	protein_coding	chr6	0.0396201	0.00207717	-2.11	0.00143	6:31571337-6:32682664
ENSG00000139697	SBNO1	Brain_Cortex1	protein_coding	chr12	0.0288008	0.0149883	2.17	0.00142	12:122009763-12:124976982
ENSG00000176953	NFATC2IP	Colon_Transverse1	protein_coding	chr16	0.110264	6.37e-11	2.32	0.00142	16:29036613-16:31382470
ENSG00000185499	MUC1	Colon_Transverse1	protein_coding	chr1	0.0925894	2.53e-09	2.12	0.00141	1:154770403-1:156336133
ENSG00000169231	THBS3	Pancreas1	protein_coding	chr1	0.265814	4.12e-22	-2.12	0.00141	1:154770403-1:156336133
ENSG00000149932	TMEM219	Pituitary1	protein_coding	chr16	0.0681421	4.74e-05	2.2	0.00141	16:29036613-16:31382470
ENSG00000103472	RRN3P2	Small_Intestine_Terminal_Ileum1	lncRNA	chr16	0.112489	6.07e-06	1.95	0.00141	16:29036613-16:31382470
ENSG00000232748	AC135050.1	Brain_Anterior_cingulate_cortex_BA241	lncRNA	chr16	0.06181	0.00239421	4.44	0.0014	16:29036613-16:31382470
ENSG00000149930	TAOK2	Brain_Anterior_cingulate_cortex_BA241	protein_coding	chr16	0.0430789	0.0116519	1.78	0.0014	16:29036613-16:31382470
ENSG00000183605	SFXN4	Brain_Cortex1	protein_coding	chr10	0.557151	9.29e-38	2.1	0.0014	10:120591693-10:122407323
ENSG00000267288	AC138150.2	Brain_Frontal_Cortex_BA91	lncRNA	chr17	0.0763413	0.000214569	-2.33	0.0014	17:43056905-17:45876022
ENSG00000272360	AC116036.2	Brain_Nucleus_accumbens_basal_ganglia1	lncRNA	chr3	0.125333	2.36e-07	-2.12	0.0014	3:58157850-3:60272829
ENSG00000178882	RFLNA	Colon_Transverse1	protein_coding	chr12	0.0126693	0.0308692	-2.09	0.0014	12:122009763-12:124976982
ENSG00000250091	DNAH10OS	Brain_Caudate_basal_ganglia1	lncRNA	chr12	0.147075	3.4e-08	2.16	0.00139	12:122009763-12:124976982
ENSG00000136068	FLNB	Colon_Sigmoid1	protein_coding	chr3	0.100119	7.97e-09	-2.13	0.00138	3:58157850-3:60272829
ENSG00000133065	SLC41A1	Pancreas1	protein_coding	chr1	0.349338	4.07e-30	0.24	0.00138	1:204681068-1:205922403
ENSG00000183605	SFXN4	Pituitary1	protein_coding	chr10	0.637933	9.34e-54	2.11	0.00138	10:120591693-10:122407323
ENSG00000183605	SFXN4	Brain_Anterior_cingulate_cortex_BA241	protein_coding	chr10	0.610153	1.84e-31	2.08	0.00137	10:120591693-10:122407323
ENSG00000276728	AC142472.1	Brain_Nucleus_accumbens_basal_ganglia1	lncRNA	chr17	0.0452961	0.00235785	-2.32	0.00137	17:43056905-17:45876022
ENSG00000250091	DNAH10OS	Brain_Putamen_basal_ganglia1	lncRNA	chr12	0.0645959	0.000824468	2.06	0.00137	12:122009763-12:124976982
ENSG00000156886	ITGAD	Colon_Transverse1	protein_coding	chr16	0.215554	4.51e-21	-2.54	0.00137	16:29036613-16:31382470
ENSG00000243368	MCCC1-AS1	Pancreas1	lncRNA	chr3	0.0705956	2.53e-06	-2.03	0.00137	3:181511166-3:183769683
ENSG00000141279	NPEPPS	Stomach1	protein_coding	chr17	0.0371135	0.000488482	0.809	0.00137	17:43056905-17:45876022
ENSG00000162877	PM20D1	Whole_Blood1	protein_coding	chr1	0.404887	2.52e-77	-0.67	0.00137	1:204681068-1:205922403
ENSG00000164181	ELOVL7	Brain_Cerebellum1	protein_coding	chr5	0.125562	1.41e-07	2.11	0.00136	5:58524622-5:60935451
ENSG00000103510	KAT8	Brain_Frontal_Cortex_BA91	protein_coding	chr16	0.26052	5.37e-13	-4.68	0.00136	16:29036613-16:31382470
ENSG00000139722	VPS37B	Brain_Spinal_cord_cervical_c-11	protein_coding	chr12	0.0520798	0.010166	-2.1	0.00136	12:122009763-12:124976982
ENSG00000145214	DGKQ	Stomach1	protein_coding	chr4	0.477424	2.68e-47	-4.77	0.00136	4:695146-4:1478711
ENSG00000103510	KAT8	Brain_Cortex1	protein_coding	chr16	0.364206	1e-21	-4.68	0.00135	16:29036613-16:31382470
ENSG00000103472	RRN3P2	Brain_Hypothalamus1	lncRNA	chr16	0.139084	5.48e-07	1.88	0.00135	16:29036613-16:31382470
ENSG00000160783	PMF1	Pancreas1	protein_coding	chr1	0.0483289	0.000108387	2.09	0.00135	1:154770403-1:156336133
ENSG00000102886	GDPD3	Small_Intestine_Terminal_Ileum1	protein_coding	chr16	0.154388	8.19e-08	-3.77	0.00135	16:29036613-16:31382470
ENSG00000177383	MAGEF1	Whole_Blood1	protein_coding	chr3	0.0757966	4.06e-13	2.1	0.00135	3:181511166-3:183769683
ENSG00000232748	AC135050.1	Brain_Hypothalamus1	lncRNA	chr16	0.0274092	0.0309598	4.51	0.00134	16:29036613-16:31382470
ENSG00000163354	DCST2	Brain_Hypothalamus1	protein_coding	chr1	0.102586	2.06e-05	-2.27	0.00134	1:154770403-1:156336133
ENSG00000130787	HIP1R	Brain_Nucleus_accumbens_basal_ganglia1	protein_coding	chr12	0.0745921	8.4e-05	-2.08	0.00134	12:122009763-12:124976982
ENSG00000204241	LINC02731	Colon_Transverse1	lncRNA	chr11	0.0879917	6.55e-09	2.07	0.00134	11:133000260-11:134205993
ENSG00000174938	SEZ6L2	Pituitary1	protein_coding	chr16	0.0590579	0.000157943	-2.34	0.00134	16:29036613-16:31382470
ENSG00000244731	C4A	Stomach1	protein_coding	chr6	0.286136	2.23e-25	-2.49	0.00134	6:31571337-6:32682664
ENSG00000272360	AC116036.2	Brain_Caudate_basal_ganglia1	lncRNA	chr3	0.0512026	0.00151081	-2.1	0.00133	3:58157850-3:60272829
ENSG00000151929	BAG3	Brain_Cerebellar_Hemisphere1	protein_coding	chr10	0.0290148	0.0242152	-2.09	0.00133	10:120591693-10:122407323
ENSG00000247735	AC120114.1	Stomach1	lncRNA	chr16	0.033841	0.000878165	-1.72	0.00133	16:29036613-16:31382470
ENSG00000163749	CCDC158	Brain_Cerebellar_Hemisphere1	protein_coding	chr4	0.0456737	0.00451427	-4.2	0.00131	4:77130707-4:79093979
ENSG00000163463	KRTCAP2	Brain_Cerebellum1	protein_coding	chr1	0.0543001	0.000685166	2.91	0.00131	1:154770403-1:156336133
ENSG00000069275	NUCKS1	Brain_Hypothalamus1	protein_coding	chr1	0.0289884	0.0264344	-3.6	0.00131	1:204681068-1:205922403
ENSG00000160785	SLC25A44	Colon_Transverse1	protein_coding	chr1	0.0978552	8.51e-10	2.08	0.00131	1:154770403-1:156336133
ENSG00000174943	KCTD13	Liver1	protein_coding	chr16	0.021298	0.0354357	-2.41	0.00131	16:29036613-16:31382470
ENSG00000197771	MCMBP	Whole_Blood1	protein_coding	chr10	0.0354088	9.32e-07	-2.09	0.00131	10:120591693-10:122407323
ENSG00000103472	RRN3P2	Brain_Cerebellar_Hemisphere1	lncRNA	chr16	0.176015	7.51e-09	1.89	0.0013	16:29036613-16:31382470
ENSG00000138758	SEPTIN11	Brain_Cortex1	protein_coding	chr4	0.157492	3.84e-09	1.87	0.0013	4:77130707-4:79093979
ENSG00000181350	LRRC75A	Brain_Hippocampus1	protein_coding	chr17	0.028417	0.0304325	2.58	0.0013	17:15020965-17:16411522
ENSG00000204304	PBX2	Colon_Sigmoid1	protein_coding	chr6	0.0188615	0.0142439	-0.201	0.0013	6:31571337-6:32682664
ENSG00000225190	PLEKHM1	Pancreas1	protein_coding	chr17	0.0134878	0.0426846	-8.2	0.0013	17:43056905-17:45876022
ENSG00000224505	AC138150.1	Stomach1	lncRNA	chr17	0.022332	0.00704622	1.21	0.0013	17:43056905-17:45876022
ENSG00000183605	SFXN4	Brain_Cerebellar_Hemisphere1	protein_coding	chr10	0.661846	1.38e-42	2.08	0.00129	10:120591693-10:122407323
ENSG00000160803	UBQLN4	Brain_Hippocampus1	protein_coding	chr1	0.0294713	0.0274683	2.02	0.00129	1:154770403-1:156336133
ENSG00000204392	LSM2	Brain_Spinal_cord_cervical_c-11	protein_coding	chr6	0.035627	0.0342872	1.76	0.00129	6:31571337-6:32682664
ENSG00000166582	CENPV	Brain_Cerebellum1	protein_coding	chr17	0.324573	2.21e-19	3.24	0.00128	17:15020965-17:16411522
ENSG00000232759	AC002480.1	Brain_Hypothalamus1	lncRNA	chr7	0.0525112	0.0026484	-2.07	0.00128	7:22508611-7:23469560
ENSG00000163467	TSACC	Brain_Putamen_basal_ganglia1	protein_coding	chr1	0.0323025	0.0190159	-2.07	0.00128	1:154770403-1:156336133
ENSG00000204394	VARS	Colon_Sigmoid1	protein_coding	chr6	0.0220009	0.00806577	-1.06	0.00128	6:31571337-6:32682664
ENSG00000204463	BAG6	Whole_Blood1	protein_coding	chr6	0.0351064	1.04e-06	-2.07	0.00128	6:31571337-6:32682664
ENSG00000184445	KNTC1	Brain_Cerebellum1	protein_coding	chr12	0.0615961	0.00029085	-2.99	0.00127	12:122009763-12:124976982
ENSG00000226816	AC005082.1	Whole_Blood1	lncRNA	chr7	0.265549	1.02e-46	-3.36	0.00127	7:22508611-7:23469560
ENSG00000103472	RRN3P2	Brain_Amygdala1	lncRNA	chr16	0.0358493	0.0316323	1.88	0.00126	16:29036613-16:31382470
ENSG00000103549	RNF40	Brain_Amygdala1	protein_coding	chr16	0.0689848	0.0026378	-4.72	0.00126	16:29036613-16:31382470
ENSG00000168306	ACOX2	Brain_Caudate_basal_ganglia1	protein_coding	chr3	0.0797854	6.6e-05	-2.07	0.00126	3:58157850-3:60272829
ENSG00000250091	DNAH10OS	Brain_Cerebellum1	lncRNA	chr12	0.104478	1.81e-06	2.36	0.00126	12:122009763-12:124976982
ENSG00000103472	RRN3P2	Brain_Cortex1	lncRNA	chr16	0.162406	2.09e-09	1.88	0.00126	16:29036613-16:31382470
ENSG00000168291	PDHB	Brain_Nucleus_accumbens_basal_ganglia1	protein_coding	chr3	0.220098	1.89e-12	-2.07	0.00126	3:58157850-3:60272829
ENSG00000130787	HIP1R	Spleen1	protein_coding	chr12	0.100305	1.11e-06	-2.07	0.00126	12:122009763-12:124976982
ENSG00000145217	SLC26A1	Brain_Anterior_cingulate_cortex_BA241	protein_coding	chr4	0.152604	1e-06	2.92	0.00125	4:695146-4:1478711
ENSG00000160685	ZBTB7B	Brain_Hypothalamus1	protein_coding	chr1	0.0761998	0.000268784	1.65	0.00125	1:154770403-1:156336133
ENSG00000169241	SLC50A1	Brain_Putamen_basal_ganglia1	protein_coding	chr1	0.0253253	0.038187	-2.08	0.00125	1:154770403-1:156336133
ENSG00000185499	MUC1	Brain_Substantia_nigra1	protein_coding	chr1	0.0590484	0.00918489	2.82	0.00125	1:154770403-1:156336133
ENSG00000204387	SNHG32	Colon_Transverse1	lncRNA	chr6	0.0476523	2.4e-05	2	0.00125	6:31571337-6:32682664
ENSG00000151006	PRSS53	Liver1	protein_coding	chr16	0.419096	4.3e-26	0.0716	0.00125	16:29036613-16:31382470
ENSG00000204351	SKIV2L	Pituitary1	protein_coding	chr6	0.342704	3.4e-23	1.96	0.00125	6:31571337-6:32682664
ENSG00000120071	KANSL1	Brain_Amygdala1	protein_coding	chr17	0.284866	7.37e-11	-8.59	0.00124	17:43056905-17:45876022
ENSG00000178950	GAK	Brain_Caudate_basal_ganglia1	protein_coding	chr4	0.0499916	0.00172521	1.9	0.00124	4:695146-4:1478711
ENSG00000163479	SSR2	Brain_Putamen_basal_ganglia1	protein_coding	chr1	0.0487877	0.00379756	2.05	0.00124	1:154770403-1:156336133
ENSG00000273133	AC116651.1	Colon_Transverse1	lncRNA	chr4	0.0924092	2.63e-09	2.06	0.00124	4:15147446-4:15926136
ENSG00000167395	ZNF646	Brain_Frontal_Cortex_BA91	protein_coding	chr16	0.0581861	0.00130097	0.164	0.00123	16:29036613-16:31382470
ENSG00000204351	SKIV2L	Brain_Hippocampus1	protein_coding	chr6	0.298909	3.03e-14	2.04	0.00123	6:31571337-6:32682664
ENSG00000139719	VPS33A	Pituitary1	protein_coding	chr12	0.0397295	0.00204715	-2.07	0.00123	12:122009763-12:124976982
ENSG00000018236	CNTN1	Small_Intestine_Terminal_Ileum1	protein_coding	chr12	0.12781	1.28e-06	-2.06	0.00123	12:40816185-12:41658193
ENSG00000160783	PMF1	Small_Intestine_Terminal_Ileum1	protein_coding	chr1	0.0421049	0.00660441	2.05	0.00123	1:154770403-1:156336133
ENSG00000272308	AC104113.1	Whole_Blood1	lncRNA	chr5	0.0321183	3.04e-06	1.43	0.00123	5:58524622-5:60935451
ENSG00000103472	RRN3P2	Brain_Frontal_Cortex_BA91	lncRNA	chr16	0.187452	2.18e-09	1.89	0.00122	16:29036613-16:31382470
ENSG00000164548	TRA2A	Liver1	protein_coding	chr7	0.0333073	0.0083291	2.13	0.00122	7:22508611-7:23469560
ENSG00000138722	MMRN1	Spleen1	protein_coding	chr4	0.0879784	5.44e-06	1.64	0.00122	4:90231746-4:91560677
ENSG00000143537	ADAM15	Stomach1	protein_coding	chr1	0.0788403	2.77e-07	-1.08	0.00122	1:154770403-1:156336133
ENSG00000130921	C12orf65	Brain_Caudate_basal_ganglia1	protein_coding	chr12	0.0853353	3.58e-05	2.63	0.00121	12:122009763-12:124976982
ENSG00000168993	CPLX1	Brain_Cortex1	protein_coding	chr4	0.0512423	0.00109951	2.64	0.00121	4:695146-4:1478711
ENSG00000183605	SFXN4	Brain_Hippocampus1	protein_coding	chr10	0.442786	1.86e-22	2.05	0.00121	10:120591693-10:122407323
ENSG00000149930	TAOK2	Brain_Putamen_basal_ganglia1	protein_coding	chr16	0.0227282	0.0497182	2.31	0.00121	16:29036613-16:31382470
ENSG00000162877	PM20D1	Brain_Spinal_cord_cervical_c-11	protein_coding	chr1	0.521603	1.38e-21	-0.745	0.00121	1:204681068-1:205922403
ENSG00000178222	RNF212	Spleen1	protein_coding	chr4	0.0882841	5.23e-06	3.28	0.00121	4:695146-4:1478711
ENSG00000204305	AGER	Spleen1	protein_coding	chr6	0.210261	3.34e-13	-2.05	0.00121	6:31571337-6:32682664
ENSG00000172292	CERS6	Whole_Blood1	protein_coding	chr2	0.0262902	2.48e-05	-2.05	0.00121	2:167356254-2:169968112
ENSG00000204351	SKIV2L	Brain_Hypothalamus1	protein_coding	chr6	0.323764	5.71e-16	2.04	0.0012	6:31571337-6:32682664
ENSG00000225342	AC079630.1	Brain_Nucleus_accumbens_basal_ganglia1	lncRNA	chr12	0.125933	2.2e-07	-2.02	0.0012	12:39227446-12:40816185
ENSG00000186834	HEXIM1	Brain_Putamen_basal_ganglia1	protein_coding	chr17	0.0813619	0.000163073	-2.29	0.0012	17:43056905-17:45876022
ENSG00000169231	THBS3	Brain_Amygdala1	protein_coding	chr1	0.173215	9.32e-07	2.32	0.00119	1:154770403-1:156336133
ENSG00000178226	PRSS36	Brain_Cerebellum1	protein_coding	chr16	0.419827	2.87e-26	-4.38	0.00119	16:29036613-16:31382470
ENSG00000156219	ART3	Colon_Sigmoid1	protein_coding	chr4	0.260216	1.82e-22	-0.54	0.00119	4:77130707-4:79093979
ENSG00000204385	SLC44A4	Pancreas1	protein_coding	chr6	0.328265	5.25e-28	2.05	0.00119	6:31571337-6:32682664
ENSG00000204344	STK19	Brain_Hypothalamus1	protein_coding	chr6	0.103351	1.91e-05	2.03	0.00118	6:31571337-6:32682664
ENSG00000204427	ABHD16A	Colon_Sigmoid1	protein_coding	chr6	0.0283803	0.00257921	-2.32	0.00118	6:31571337-6:32682664
ENSG00000143622	RIT1	Whole_Blood1	protein_coding	chr1	0.0160225	0.00102513	2.02	0.00118	1:154770403-1:156336133
ENSG00000149929	HIRIP3	Brain_Anterior_cingulate_cortex_BA241	protein_coding	chr16	0.0510674	0.00592004	2	0.00117	16:29036613-16:31382470
ENSG00000239381	AC125613.1	Brain_Cerebellum1	lncRNA	chr3	0.0831082	2.31e-05	2.03	0.00117	3:181511166-3:183769683
ENSG00000179195	ZNF664	Brain_Cortex1	protein_coding	chr12	0.0216908	0.0350906	-1.8	0.00117	12:122009763-12:124976982
ENSG00000168301	KCTD6	Brain_Hippocampus1	protein_coding	chr3	0.0554375	0.00233178	-2.03	0.00117	3:58157850-3:60272829
ENSG00000247735	AC120114.1	Brain_Hypothalamus1	lncRNA	chr16	0.0304681	0.022811	2.35	0.00117	16:29036613-16:31382470
ENSG00000272360	AC116036.2	Brain_Putamen_basal_ganglia1	lncRNA	chr3	0.0451667	0.0053959	-2.03	0.00117	3:58157850-3:60272829
ENSG00000109743	BST1	Colon_Sigmoid1	protein_coding	chr4	0.0273336	0.00310649	-2.03	0.00117	4:15147446-4:15926136
ENSG00000221988	PPT2	Colon_Transverse1	protein_coding	chr6	0.0106899	0.0474826	1.99	0.00117	6:31571337-6:32682664
ENSG00000250091	DNAH10OS	Liver1	lncRNA	chr12	0.0319343	0.00980697	1.93	0.00117	12:122009763-12:124976982
ENSG00000168291	PDHB	Pituitary1	protein_coding	chr3	0.203235	2.89e-13	-2.02	0.00117	3:58157850-3:60272829
ENSG00000103472	RRN3P2	Brain_Cerebellum1	lncRNA	chr16	0.189044	4.76e-11	1.89	0.00116	16:29036613-16:31382470
ENSG00000204351	SKIV2L	Brain_Cortex1	protein_coding	chr6	0.420348	7.84e-26	2.35	0.00116	6:31571337-6:32682664
ENSG00000078081	LAMP3	Colon_Transverse1	protein_coding	chr3	0.0174037	0.0113028	-2.53	0.00116	3:181511166-3:183769683
ENSG00000204351	SKIV2L	Colon_Transverse1	protein_coding	chr6	0.432594	5.79e-47	2.02	0.00116	6:31571337-6:32682664
ENSG00000237541	HLA-DQA2	Liver1	protein_coding	chr6	0.613915	1.89e-44	-2	0.00116	6:31571337-6:32682664
ENSG00000203805	PLPP4	Brain_Cerebellar_Hemisphere1	protein_coding	chr10	0.589109	3.04e-35	2.02	0.00115	10:120591693-10:122407323
ENSG00000160685	ZBTB7B	Brain_Cortex1	protein_coding	chr1	0.0265964	0.0194707	1.92	0.00115	1:154770403-1:156336133
ENSG00000169288	MRPL1	Brain_Cortex1	protein_coding	chr4	0.0586285	0.000469087	1.87	0.00115	4:77130707-4:79093979
ENSG00000273582	AC009093.5	Brain_Substantia_nigra1	lncRNA	chr16	0.073093	0.00362362	1.8	0.00115	16:29036613-16:31382470
ENSG00000114770	ABCC5	Pancreas1	protein_coding	chr3	0.0638449	7.92e-06	2.02	0.00115	3:181511166-3:183769683
ENSG00000186212	SOWAHB	Pancreas1	protein_coding	chr4	0.032019	0.00170363	-1.67	0.00115	4:77130707-4:79093979
ENSG00000166582	CENPV	Pituitary1	protein_coding	chr17	0.210664	9.46e-14	3.24	0.00115	17:15020965-17:16411522
ENSG00000250616	AC012645.1	Brain_Caudate_basal_ganglia1	lncRNA	chr16	0.0451289	0.00294153	2.34	0.00114	16:29036613-16:31382470
ENSG00000197471	SPN	Colon_Sigmoid1	protein_coding	chr16	0.0126667	0.0449137	-1.32	0.00114	16:29036613-16:31382470
ENSG00000139722	VPS37B	Colon_Transverse1	protein_coding	chr12	0.0316895	0.000601911	-1.64	0.00114	12:122009763-12:124976982
ENSG00000141279	NPEPPS	Pituitary1	protein_coding	chr17	0.106997	2.58e-07	0.48	0.00114	17:43056905-17:45876022
ENSG00000274682	AC015540.1	Brain_Cerebellar_Hemisphere1	lncRNA	chr12	0.126426	1.37e-06	-2.01	0.00113	12:40816185-12:41658193
ENSG00000178226	PRSS36	Brain_Hypothalamus1	protein_coding	chr16	0.253638	2.55e-12	-4.44	0.00113	16:29036613-16:31382470
ENSG00000139697	SBNO1	Brain_Spinal_cord_cervical_c-11	protein_coding	chr12	0.0440354	0.0183557	2.01	0.00113	12:122009763-12:124976982
ENSG00000103510	KAT8	Liver1	protein_coding	chr16	0.190491	4.39e-11	-4.69	0.00113	16:29036613-16:31382470
ENSG00000160803	UBQLN4	Brain_Amygdala1	protein_coding	chr1	0.0843646	0.000840432	2.26	0.00112	1:154770403-1:156336133
ENSG00000174514	MFSD4A	Brain_Cerebellar_Hemisphere1	protein_coding	chr1	0.0799975	0.000149127	2.65	0.00112	1:204681068-1:205922403
ENSG00000168477	TNXB	Brain_Cerebellum1	protein_coding	chr6	0.0820666	2.61e-05	1.99	0.00112	6:31571337-6:32682664
ENSG00000225914	TSBP1-AS1	Brain_Frontal_Cortex_BA91	lncRNA	chr6	0.102819	1.52e-05	3.32	0.00112	6:31571337-6:32682664
ENSG00000166086	JAM3	Brain_Spinal_cord_cervical_c-11	protein_coding	chr11	0.0941496	0.000474749	2.01	0.00112	11:133000260-11:134205993
ENSG00000204304	PBX2	Brain_Caudate_basal_ganglia1	protein_coding	chr6	0.0568043	0.000818244	2.01	0.00111	6:31571337-6:32682664
ENSG00000278133	AC135050.6	Brain_Cortex1	lncRNA	chr16	0.0465994	0.00187971	4.61	0.00111	16:29036613-16:31382470
ENSG00000168993	CPLX1	Brain_Nucleus_accumbens_basal_ganglia1	protein_coding	chr4	0.0233561	0.0299031	-1.2	0.00111	4:695146-4:1478711
ENSG00000069275	NUCKS1	Liver1	protein_coding	chr1	0.0296904	0.0128195	-2.09	0.00111	1:204681068-1:205922403
ENSG00000035499	DEPDC1B	Brain_Cerebellum1	protein_coding	chr5	0.150271	6.68e-09	-2	0.0011	5:58524622-5:60935451
ENSG00000272360	AC116036.2	Brain_Cortex1	lncRNA	chr3	0.0730728	8.86e-05	-2	0.0011	3:58157850-3:60272829
ENSG00000198502	HLA-DRB5	Colon_Sigmoid1	protein_coding	chr6	0.668732	8.45e-78	0.455	0.0011	6:31571337-6:32682664
ENSG00000153086	ACMSD	Pancreas1	protein_coding	chr2	0.013907	0.0395655	-2	0.0011	2:135159453-2:137042794
ENSG00000204344	STK19	Stomach1	protein_coding	chr6	0.141944	2.29e-12	2.32	0.0011	6:31571337-6:32682664
ENSG00000204351	SKIV2L	Stomach1	protein_coding	chr6	0.397035	2.97e-37	2.32	0.0011	6:31571337-6:32682664
ENSG00000103510	KAT8	Brain_Amygdala1	protein_coding	chr16	0.157045	3.34e-06	-4.68	0.00109	16:29036613-16:31382470
ENSG00000069275	NUCKS1	Brain_Amygdala1	protein_coding	chr1	0.059729	0.00525074	-3.78	0.00109	1:204681068-1:205922403
ENSG00000185829	ARL17A	Brain_Frontal_Cortex_BA91	protein_coding	chr17	0.527336	5.86e-30	-8.44	0.00109	17:43056905-17:45876022
ENSG00000163749	CCDC158	Brain_Cortex1	protein_coding	chr4	0.12853	1.3e-07	-4.22	0.00108	4:77130707-4:79093979
ENSG00000237765	FAM200B	Colon_Sigmoid1	protein_coding	chr4	0.0452971	0.000131153	1.99	0.00108	4:15147446-4:15926136
ENSG00000185829	ARL17A	Spleen1	protein_coding	chr17	0.416008	4.3e-28	1.69	0.00108	17:43056905-17:45876022
ENSG00000163684	RPP14	Spleen1	protein_coding	chr3	0.110921	2.78e-07	2.01	0.00108	3:58157850-3:60272829
ENSG00000139722	VPS37B	Stomach1	protein_coding	chr12	0.0211153	0.00880832	-2.02	0.00108	12:122009763-12:124976982
ENSG00000073969	NSF	Brain_Caudate_basal_ganglia1	protein_coding	chr17	0.0332846	0.0108938	-4.47	0.00107	17:43056905-17:45876022
ENSG00000243364	EFNA4	Brain_Frontal_Cortex_BA91	protein_coding	chr1	0.0465134	0.00415162	-2.34	0.00107	1:154770403-1:156336133
ENSG00000151498	ACAD8	Brain_Spinal_cord_cervical_c-11	protein_coding	chr11	0.0402984	0.024203	-1.99	0.00107	11:133000260-11:134205993
ENSG00000139722	VPS37B	Small_Intestine_Terminal_Ileum1	protein_coding	chr12	0.0290347	0.0245802	-1.98	0.00107	12:122009763-12:124976982
ENSG00000260487	AC116348.1	Spleen1	lncRNA	chr16	0.191069	5.21e-12	2.55	0.00107	16:29036613-16:31382470
ENSG00000185829	ARL17A	Brain_Caudate_basal_ganglia1	protein_coding	chr17	0.379656	1.15e-21	0.648	0.00105	17:43056905-17:45876022
ENSG00000178882	RFLNA	Brain_Cerebellar_Hemisphere1	protein_coding	chr12	0.0453155	0.00467852	-1.8	0.00105	12:122009763-12:124976982
ENSG00000163354	DCST2	Brain_Cerebellar_Hemisphere1	protein_coding	chr1	0.387595	3.66e-20	-2.21	0.00105	1:154770403-1:156336133
ENSG00000103510	KAT8	Brain_Cerebellum1	protein_coding	chr16	0.400926	8.09e-25	-4.33	0.00105	16:29036613-16:31382470
ENSG00000204344	STK19	Brain_Cortex1	protein_coding	chr6	0.163136	1.91e-09	2.31	0.00105	6:31571337-6:32682664
ENSG00000151923	TIAL1	Brain_Nucleus_accumbens_basal_ganglia1	protein_coding	chr10	0.0362027	0.00668207	-1.89	0.00105	10:120591693-10:122407323
ENSG00000168291	PDHB	Brain_Spinal_cord_cervical_c-11	protein_coding	chr3	0.243905	4.19e-09	-1.97	0.00105	3:58157850-3:60272829
ENSG00000099385	BCL7C	Liver1	protein_coding	chr16	0.0449255	0.00211598	-4.26	0.00105	16:29036613-16:31382470
ENSG00000184047	DIABLO	Pancreas1	protein_coding	chr12	0.0233254	0.00754014	1.81	0.00105	12:122009763-12:124976982
ENSG00000181350	LRRC75A	Pancreas1	protein_coding	chr17	0.154479	1.04e-12	0.836	0.00105	17:15020965-17:16411522
ENSG00000167394	ZNF668	Brain_Cerebellar_Hemisphere1	protein_coding	chr16	0.0284237	0.0257285	5.04	0.00104	16:29036613-16:31382470
ENSG00000260262	AC139887.3	Brain_Cerebellar_Hemisphere1	lncRNA	chr4	0.0318238	0.0181779	4.74	0.00104	4:695146-4:1478711
ENSG00000138760	SCARB2	Brain_Frontal_Cortex_BA91	protein_coding	chr4	0.0772546	0.000195937	3.36	0.00104	4:77130707-4:79093979
ENSG00000215375	MYL5	Brain_Hippocampus1	protein_coding	chr4	0.0277713	0.032409	2.71	0.00104	4:695146-4:1478711
ENSG00000204396	VWA7	Brain_Hypothalamus1	protein_coding	chr6	0.122929	2.77e-06	-1.97	0.00104	6:31571337-6:32682664
ENSG00000069275	NUCKS1	Pancreas1	protein_coding	chr1	0.117253	8.13e-10	-3.01	0.00104	1:204681068-1:205922403
ENSG00000204314	PRRT1	Small_Intestine_Terminal_Ileum1	protein_coding	chr6	0.0617771	0.000942942	-1.95	0.00104	6:31571337-6:32682664
ENSG00000259807	AC009093.1	Whole_Blood1	lncRNA	chr16	0.0315203	3.77e-06	1.68	0.00104	16:29036613-16:31382470
ENSG00000274461	AC023282.1	Brain_Cerebellar_Hemisphere1	lncRNA	chr10	0.585052	7.13e-35	1.96	0.00103	10:120591693-10:122407323
ENSG00000132698	RAB25	Brain_Nucleus_accumbens_basal_ganglia1	protein_coding	chr1	0.0864938	2.15e-05	-0.824	0.00103	1:154770403-1:156336133
ENSG00000138759	FRAS1	Brain_Nucleus_accumbens_basal_ganglia1	protein_coding	chr4	0.0425655	0.00322084	1.79	0.00103	4:77130707-4:79093979
ENSG00000244731	C4A	Brain_Cortex1	protein_coding	chr6	0.305992	7.92e-18	-2.3	0.00102	6:31571337-6:32682664
ENSG00000204396	VWA7	Brain_Cortex1	protein_coding	chr6	0.0350618	0.00717932	-1.79	0.00102	6:31571337-6:32682664
ENSG00000276728	AC142472.1	Brain_Frontal_Cortex_BA91	lncRNA	chr17	0.0382171	0.00952408	-2.25	0.00102	17:43056905-17:45876022
ENSG00000204290	BTNL2	Brain_Frontal_Cortex_BA91	protein_coding	chr6	0.0991639	2.19e-05	0.612	0.00102	6:31571337-6:32682664
ENSG00000204386	NEU1	Brain_Frontal_Cortex_BA91	protein_coding	chr6	0.0288485	0.0246314	-0.612	0.00102	6:31571337-6:32682664
ENSG00000231064	AC234582.1	Colon_Sigmoid1	lncRNA	chr1	0.0347023	0.000843435	-1.96	0.00102	1:154770403-1:156336133
ENSG00000188906	LRRK2	Pancreas1	protein_coding	chr12	0.0182822	0.0181505	1.96	0.00102	12:40816185-12:41658193
ENSG00000130779	CLIP1	Pancreas1	protein_coding	chr12	0.169102	7.1e-14	1.88	0.00102	12:122009763-12:124976982
ENSG00000103472	RRN3P2	Pancreas1	lncRNA	chr16	0.0973199	2.62e-08	1.77	0.00102	16:29036613-16:31382470
ENSG00000162877	PM20D1	Pituitary1	protein_coding	chr1	0.384479	1.43e-26	-0.781	0.00102	1:204681068-1:205922403
ENSG00000168309	FAM107A	Spleen1	protein_coding	chr3	0.0650366	0.000102105	-1.94	0.00102	3:58157850-3:60272829
ENSG00000120071	KANSL1	Stomach1	protein_coding	chr17	0.235511	1.51e-20	4.18	0.00102	17:43056905-17:45876022
ENSG00000170425	ADORA2B	Brain_Caudate_basal_ganglia1	protein_coding	chr17	0.086332	3.21e-05	3.08	0.00101	17:15020965-17:16411522
ENSG00000005844	ITGAL	Brain_Cerebellar_Hemisphere1	protein_coding	chr16	0.0438432	0.00541942	2.06	0.00101	16:29036613-16:31382470
ENSG00000260083	MIR762HG	Brain_Cortex1	lncRNA	chr16	0.0441703	0.00248969	-4.19	0.00101	16:29036613-16:31382470
ENSG00000137310	TCF19	Brain_Cortex1	protein_coding	chr6	0.316977	1.54e-18	2.28	0.00101	6:31571337-6:32682664
ENSG00000109099	PMP22	Brain_Nucleus_accumbens_basal_ganglia1	protein_coding	chr17	0.0369242	0.0061497	1.27	0.00101	17:15020965-17:16411522
ENSG00000185829	ARL17A	Pancreas1	protein_coding	chr17	0.404702	5.34e-36	1.18	0.00101	17:43056905-17:45876022
ENSG00000250616	AC012645.1	Brain_Cortex1	lncRNA	chr16	0.0246962	0.0244304	2.34	0.001	16:29036613-16:31382470
ENSG00000275263	AC135048.3	Brain_Frontal_Cortex_BA91	lncRNA	chr16	0.0369595	0.0108093	4.4	0.001	16:29036613-16:31382470
ENSG00000122591	FAM126A	Colon_Sigmoid1	protein_coding	chr7	0.0763581	5.56e-07	-1.55	0.001	7:22508611-7:23469560
ENSG00000103472	RRN3P2	Spleen1	lncRNA	chr16	0.218931	9.47e-14	1.76	0.001	16:29036613-16:31382470
ENSG00000069275	NUCKS1	Brain_Caudate_basal_ganglia1	protein_coding	chr1	0.0682044	0.00023501	-3.61	0.000999	1:204681068-1:205922403
ENSG00000163344	PMVK	Colon_Transverse1	protein_coding	chr1	0.0117256	0.0378661	-1.95	0.000998	1:154770403-1:156336133
ENSG00000204386	NEU1	Stomach1	protein_coding	chr6	0.0254217	0.00401109	-2.28	0.000998	6:31571337-6:32682664
ENSG00000082258	CCNT2	Colon_Transverse1	protein_coding	chr2	0.148878	1.64e-14	-2	0.000997	2:135159453-2:137042794
ENSG00000163344	PMVK	Whole_Blood1	protein_coding	chr1	0.0275043	1.6e-05	-1.95	0.000997	1:154770403-1:156336133
ENSG00000163463	KRTCAP2	Brain_Nucleus_accumbens_basal_ganglia1	protein_coding	chr1	0.022422	0.0334199	-2.22	0.000996	1:154770403-1:156336133
ENSG00000139722	VPS37B	Whole_Blood1	protein_coding	chr12	0.0159903	0.00103727	-1.94	0.000996	12:122009763-12:124976982
ENSG00000090238	YPEL3	Colon_Transverse1	protein_coding	chr16	0.375492	2.6e-39	-2.03	0.000994	16:29036613-16:31382470
ENSG00000276728	AC142472.1	Brain_Putamen_basal_ganglia1	lncRNA	chr17	0.0752296	0.000295225	-2.18	0.000992	17:43056905-17:45876022
ENSG00000166582	CENPV	Brain_Hypothalamus1	protein_coding	chr17	0.384891	1.84e-19	3.24	0.000991	17:15020965-17:16411522
ENSG00000214401	KANSL1-AS1	Colon_Transverse1	lncRNA	chr17	0.642342	1e-83	2.57	0.000991	17:43056905-17:45876022
ENSG00000167395	ZNF646	Spleen1	protein_coding	chr16	0.110357	3e-07	-3.61	0.00099	16:29036613-16:31382470
ENSG00000228696	ARL17B	Stomach1	protein_coding	chr17	0.462225	2.76e-45	4.47	0.00099	17:43056905-17:45876022
ENSG00000143603	KCNN3	Brain_Spinal_cord_cervical_c-11	protein_coding	chr1	0.0877071	0.000759767	-1.63	0.000989	1:154770403-1:156336133
ENSG00000196735	HLA-DQA1	Brain_Cerebellum1	protein_coding	chr6	0.10117	2.69e-06	1.89	0.000985	6:31571337-6:32682664
ENSG00000163686	ABHD6	Stomach1	protein_coding	chr3	0.0284415	0.00232108	-1.9	0.000984	3:58157850-3:60272829
ENSG00000196735	HLA-DQA1	Brain_Cortex1	protein_coding	chr6	0.174154	4.82e-10	1.89	0.000981	6:31571337-6:32682664
ENSG00000204396	VWA7	Brain_Nucleus_accumbens_basal_ganglia1	protein_coding	chr6	0.0846885	2.65e-05	-1.93	0.00098	6:31571337-6:32682664
ENSG00000185829	ARL17A	Liver1	protein_coding	chr17	0.389408	7.56e-24	1.24	0.000979	17:43056905-17:45876022
ENSG00000004468	CD38	Colon_Sigmoid1	protein_coding	chr4	0.147253	1.35e-12	1.94	0.000977	4:15147446-4:15926136
ENSG00000118804	STBD1	Liver1	protein_coding	chr4	0.0301796	0.012091	1.97	0.000976	4:77130707-4:79093979
ENSG00000273002	AL355388.2	Small_Intestine_Terminal_Ileum1	lncRNA	chr1	0.046225	0.00438569	-1.93	0.000972	1:154770403-1:156336133
ENSG00000150967	ABCB9	Stomach1	protein_coding	chr12	0.0409789	0.0002447	-1.95	0.00097	12:122009763-12:124976982
ENSG00000073969	NSF	Brain_Anterior_cingulate_cortex_BA241	protein_coding	chr17	0.0296966	0.0368738	-4.39	0.000968	17:43056905-17:45876022
ENSG00000103472	RRN3P2	Brain_Putamen_basal_ganglia1	lncRNA	chr16	0.132484	1.07e-06	1.75	0.000966	16:29036613-16:31382470
ENSG00000169203	RP11-231C14.4	Brain_Spinal_cord_cervical_c-11	protein_coding	chr16	0.244761	3.9e-09	-1.8	0.000965	16:29036613-16:31382470
ENSG00000249592	AC139887.2	Pituitary1	lncRNA	chr4	0.0280526	0.0097916	1.27	0.000964	4:695146-4:1478711
ENSG00000103549	RNF40	Brain_Hypothalamus1	protein_coding	chr16	0.0751499	0.000297507	-2.62	0.000963	16:29036613-16:31382470
ENSG00000244161	FLNB-AS1	Pancreas1	lncRNA	chr3	0.0618041	1.12e-05	-1.94	0.000962	3:58157850-3:60272829
ENSG00000238045	AC009133.1	Brain_Spinal_cord_cervical_c-11	lncRNA	chr16	0.114229	0.000108606	1.55	0.00096	16:29036613-16:31382470
ENSG00000069275	NUCKS1	Brain_Cortex1	protein_coding	chr1	0.030514	0.0122427	-3.92	0.000959	1:204681068-1:205922403
ENSG00000259207	ITGB3	Small_Intestine_Terminal_Ileum1	protein_coding	chr17	0.132058	8.28e-07	1.31	0.000957	17:43056905-17:45876022
ENSG00000143537	ADAM15	Brain_Frontal_Cortex_BA91	protein_coding	chr1	0.222604	4.37e-11	-1.59	0.000956	1:154770403-1:156336133
ENSG00000178722	C5orf64	Pituitary1	lncRNA	chr5	0.0691466	4.15e-05	1.85	0.000955	5:58524622-5:60935451
ENSG00000141279	NPEPPS	Brain_Caudate_basal_ganglia1	protein_coding	chr17	0.0782548	7.8e-05	0.501	0.000954	17:43056905-17:45876022
ENSG00000079616	KIF22	Brain_Cerebellar_Hemisphere1	protein_coding	chr16	0.0272698	0.0289696	1.82	0.000953	16:29036613-16:31382470
ENSG00000169203	RP11-231C14.4	Brain_Cortex1	protein_coding	chr16	0.125923	1.78e-07	-1.94	0.000953	16:29036613-16:31382470
ENSG00000145191	EIF2B5	Brain_Cortex1	protein_coding	chr3	0.0759692	6.33e-05	-2.02	0.000952	3:181511166-3:183769683
ENSG00000174529	TMEM81	Brain_Cerebellar_Hemisphere1	protein_coding	chr1	0.175408	8.02e-09	1.92	0.000949	1:204681068-1:205922403
ENSG00000163354	DCST2	Brain_Cortex1	protein_coding	chr1	0.309765	4.53e-18	-2.37	0.000945	1:154770403-1:156336133
ENSG00000179085	DPM3	Colon_Sigmoid1	protein_coding	chr1	0.0291171	0.00226307	1.92	0.000945	1:154770403-1:156336133
ENSG00000214401	KANSL1-AS1	Pituitary1	lncRNA	chr17	0.67463	3.2e-59	-8.06	0.000944	17:43056905-17:45876022
ENSG00000163545	NUAK2	Whole_Blood1	protein_coding	chr1	0.17774	2.98e-30	1.7	0.000943	1:204681068-1:205922403
ENSG00000250616	AC012645.1	Brain_Putamen_basal_ganglia1	lncRNA	chr16	0.0331318	0.0175186	2.34	0.00094	16:29036613-16:31382470
ENSG00000133065	SLC41A1	Colon_Sigmoid1	protein_coding	chr1	0.023685	0.00595928	1.39	0.000939	1:204681068-1:205922403
ENSG00000166582	CENPV	Liver1	protein_coding	chr17	0.0723208	8.58e-05	-0.546	0.000939	17:15020965-17:16411522
ENSG00000178226	PRSS36	Brain_Caudate_basal_ganglia1	protein_coding	chr16	0.378862	1.3e-21	-4.42	0.000938	16:29036613-16:31382470
ENSG00000275413	AC002553.2	Brain_Hypothalamus1	lncRNA	chr17	0.0641489	0.000860813	-0.253	0.000934	17:15020965-17:16411522
ENSG00000174938	SEZ6L2	Colon_Sigmoid1	protein_coding	chr16	0.0364467	0.000620385	-2.34	0.000934	16:29036613-16:31382470
ENSG00000276855	AC015922.3	Brain_Cerebellum1	lncRNA	chr17	0.211343	2.52e-12	-2.07	0.000933	17:15020965-17:16411522
ENSG00000103549	RNF40	Brain_Hippocampus1	protein_coding	chr16	0.063903	0.00105349	-3.82	0.000933	16:29036613-16:31382470
ENSG00000196735	HLA-DQA1	Small_Intestine_Terminal_Ileum1	protein_coding	chr6	0.237479	9.16e-12	1.91	0.000933	6:31571337-6:32682664
ENSG00000214401	KANSL1-AS1	Brain_Amygdala1	lncRNA	chr17	0.552675	6.16e-24	-8.53	0.000928	17:43056905-17:45876022
ENSG00000263293	AC068234.2	Whole_Blood1	lncRNA	chr17	0.014097	0.002081	-1.07	0.000926	17:43056905-17:45876022
ENSG00000250091	DNAH10OS	Brain_Cerebellar_Hemisphere1	lncRNA	chr12	0.0981502	2.43e-05	2.04	0.000925	12:122009763-12:124976982
ENSG00000160685	ZBTB7B	Brain_Hippocampus1	protein_coding	chr1	0.0557694	0.00226021	1.78	0.000925	1:154770403-1:156336133
ENSG00000127418	FGFRL1	Brain_Nucleus_accumbens_basal_ganglia1	protein_coding	chr4	0.0536945	0.000905955	-1.22	0.000922	4:695146-4:1478711
ENSG00000168291	PDHB	Brain_Putamen_basal_ganglia1	protein_coding	chr3	0.149295	1.95e-07	-1.91	0.000922	3:58157850-3:60272829
ENSG00000196735	HLA-DQA1	Colon_Sigmoid1	protein_coding	chr6	0.287103	4.98e-25	1.71	0.000922	6:31571337-6:32682664
ENSG00000168297	PXK	Spleen1	protein_coding	chr3	0.254721	4.5e-16	-1.93	0.000922	3:58157850-3:60272829
ENSG00000274461	AC023282.1	Brain_Cerebellum1	lncRNA	chr10	0.599749	4.95e-43	1.9	0.00092	10:120591693-10:122407323
ENSG00000164181	ELOVL7	Whole_Blood1	protein_coding	chr5	0.0763305	3.33e-13	0.17	0.00092	5:58524622-5:60935451
ENSG00000136235	GPNMB	Brain_Cerebellar_Hemisphere1	protein_coding	chr7	0.275414	8.99e-14	2.27	0.000919	7:22508611-7:23469560
ENSG00000179195	ZNF664	Brain_Frontal_Cortex_BA91	protein_coding	chr12	0.0496417	0.00304019	-1.74	0.000917	12:122009763-12:124976982
ENSG00000104219	ZDHHC2	Colon_Transverse1	protein_coding	chr8	0.241819	8.38e-24	1.9	0.000915	8:15991660-8:17387624
ENSG00000172992	DCAKD	Liver1	protein_coding	chr17	0.0206917	0.0381845	-2.55	0.000914	17:43056905-17:45876022
ENSG00000272849	AC084018.1	Small_Intestine_Terminal_Ileum1	lncRNA	chr12	0.257706	8.72e-13	-1.88	0.000914	12:122009763-12:124976982
ENSG00000166086	JAM3	Whole_Blood1	protein_coding	chr11	0.0202448	0.000219999	1.64	0.000914	11:133000260-11:134205993
ENSG00000102886	GDPD3	Pancreas1	protein_coding	chr16	0.0642282	7.42e-06	1.65	0.000913	16:29036613-16:31382470
ENSG00000231064	AC234582.1	Pancreas1	lncRNA	chr1	0.0545551	3.8e-05	-1.89	0.000912	1:154770403-1:156336133
ENSG00000143537	ADAM15	Brain_Amygdala1	protein_coding	chr1	0.0675111	0.00294316	-1.57	0.000911	1:154770403-1:156336133
ENSG00000272360	AC116036.2	Colon_Sigmoid1	lncRNA	chr3	0.113093	7.58e-10	-1.74	0.000911	3:58157850-3:60272829
ENSG00000163346	PBXIP1	Liver1	protein_coding	chr1	0.025387	0.0215168	-1.65	0.00091	1:154770403-1:156336133
ENSG00000196735	HLA-DQA1	Brain_Putamen_basal_ganglia1	protein_coding	chr6	0.190291	2.74e-09	1.89	0.000908	6:31571337-6:32682664
ENSG00000272360	AC116036.2	Brain_Frontal_Cortex_BA91	lncRNA	chr3	0.0622953	0.000865393	-1.9	0.000905	3:58157850-3:60272829
ENSG00000177628	GBA	Brain_Nucleus_accumbens_basal_ganglia1	protein_coding	chr1	0.0444462	0.00259806	1.41	0.000905	1:154770403-1:156336133
ENSG00000145214	DGKQ	Brain_Anterior_cingulate_cortex_BA241	protein_coding	chr4	0.160538	4.94e-07	6.07	0.000904	4:695146-4:1478711
ENSG00000181350	LRRC75A	Brain_Nucleus_accumbens_basal_ganglia1	protein_coding	chr17	0.0414675	0.00365187	2.29	0.000904	17:15020965-17:16411522
ENSG00000089053	ANAPC5	Brain_Hypothalamus1	protein_coding	chr12	0.0483064	0.00397889	-1.89	0.000903	12:122009763-12:124976982
ENSG00000122591	FAM126A	Liver1	protein_coding	chr7	0.0380978	0.00472389	2.23	0.000903	7:22508611-7:23469560
ENSG00000232759	AC002480.1	Brain_Nucleus_accumbens_basal_ganglia1	lncRNA	chr7	0.0614439	0.000375359	-1.98	0.000902	7:22508611-7:23469560
ENSG00000272360	AC116036.2	Spleen1	lncRNA	chr3	0.149352	1.68e-09	-1.8	0.000901	3:58157850-3:60272829
ENSG00000078070	MCCC1	Pancreas1	protein_coding	chr3	0.0764906	9.28e-07	-1.76	0.000899	3:181511166-3:183769683
ENSG00000273582	AC009093.5	Brain_Hypothalamus1	lncRNA	chr16	0.0791508	0.000202017	1.67	0.000897	16:29036613-16:31382470
ENSG00000162873	KLHDC8A	Brain_Cerebellar_Hemisphere1	protein_coding	chr1	0.284072	3.13e-14	2.03	0.000895	1:204681068-1:205922403
ENSG00000162873	KLHDC8A	Brain_Cortex1	protein_coding	chr1	0.0196988	0.0447284	2.17	0.00089	1:204681068-1:205922403
ENSG00000231852	CYP21A2	Brain_Cortex1	protein_coding	chr6	0.250992	2e-14	-2.26	0.00089	6:31571337-6:32682664
ENSG00000241404	EGFL8	Pituitary1	protein_coding	chr6	0.0170091	0.0448844	1.65	0.00089	6:31571337-6:32682664
ENSG00000157837	SPPL3	Brain_Spinal_cord_cervical_c-11	protein_coding	chr12	0.0831793	0.00105666	1.88	0.000888	12:122009763-12:124976982
ENSG00000169288	MRPL1	Brain_Frontal_Cortex_BA91	protein_coding	chr4	0.0898596	5.57e-05	1.44	0.000887	4:77130707-4:79093979
ENSG00000233885	YEATS2-AS1	Brain_Caudate_basal_ganglia1	lncRNA	chr3	0.432295	2.16e-25	-1.89	0.000886	3:181511166-3:183769683
ENSG00000169241	SLC50A1	Brain_Cerebellum1	protein_coding	chr1	0.065279	0.000188693	-3.3	0.000885	1:154770403-1:156336133
ENSG00000178722	C5orf64	Brain_Frontal_Cortex_BA91	lncRNA	chr5	0.207934	2.28e-10	1.86	0.000885	5:58524622-5:60935451
ENSG00000160803	UBQLN4	Brain_Nucleus_accumbens_basal_ganglia1	protein_coding	chr1	0.0910523	1.28e-05	2.08	0.000885	1:154770403-1:156336133
ENSG00000244731	C4A	Pancreas1	protein_coding	chr6	0.241534	5.96e-20	-1.89	0.000885	6:31571337-6:32682664
ENSG00000139722	VPS37B	Brain_Hypothalamus1	protein_coding	chr12	0.0276735	0.03015	-1.86	0.000882	12:122009763-12:124976982
ENSG00000255258	LINC02743	Spleen1	lncRNA	chr11	0.136746	9.15e-09	-1.69	0.000881	11:133000260-11:134205993
ENSG00000163749	CCDC158	Brain_Anterior_cingulate_cortex_BA241	protein_coding	chr4	0.212797	4.1e-09	-3.47	0.000877	4:77130707-4:79093979
ENSG00000242252	BGLAP	Whole_Blood1	protein_coding	chr1	0.0228961	8.42e-05	1.88	0.000877	1:154770403-1:156336133
ENSG00000204394	VARS	Brain_Nucleus_accumbens_basal_ganglia1	protein_coding	chr6	0.0353869	0.00734051	1.88	0.000875	6:31571337-6:32682664
ENSG00000163872	YEATS2	Brain_Substantia_nigra1	protein_coding	chr3	0.0555299	0.0116044	1.88	0.000874	3:181511166-3:183769683
ENSG00000110931	CAMKK2	Brain_Frontal_Cortex_BA91	protein_coding	chr12	0.0280804	0.0266518	-1.88	0.000871	12:122009763-12:124976982
ENSG00000111328	CDK2AP1	Brain_Hypothalamus1	protein_coding	chr12	0.0233343	0.0467361	1.87	0.00087	12:122009763-12:124976982
ENSG00000111325	OGFOD2	Colon_Transverse1	protein_coding	chr12	0.0370041	0.000205332	-1.73	0.00087	12:122009763-12:124976982
ENSG00000111328	CDK2AP1	Small_Intestine_Terminal_Ileum1	protein_coding	chr12	0.206146	3.13e-10	1.87	0.00087	12:122009763-12:124976982
ENSG00000166582	CENPV	Stomach1	protein_coding	chr17	0.141451	2.52e-12	3.15	0.000868	17:15020965-17:16411522
ENSG00000186834	HEXIM1	Brain_Nucleus_accumbens_basal_ganglia1	protein_coding	chr17	0.0570685	0.000617281	-1.67	0.000867	17:43056905-17:45876022
ENSG00000130779	CLIP1	Brain_Cerebellar_Hemisphere1	protein_coding	chr12	0.0321041	0.017667	-2.33	0.000866	12:122009763-12:124976982
ENSG00000079616	KIF22	Small_Intestine_Terminal_Ileum1	protein_coding	chr16	0.0584608	0.00130798	-1.39	0.000866	16:29036613-16:31382470
ENSG00000163749	CCDC158	Brain_Nucleus_accumbens_basal_ganglia1	protein_coding	chr4	0.0453681	0.00233855	-3.72	0.000865	4:77130707-4:79093979
ENSG00000184305	CCSER1	Brain_Putamen_basal_ganglia1	protein_coding	chr4	0.022785	0.0494303	0.565	0.000865	4:90231746-4:91560677
ENSG00000272360	AC116036.2	Pituitary1	lncRNA	chr3	0.0783811	1.21e-05	-1.81	0.000865	3:58157850-3:60272829
ENSG00000277543	AC026471.5	Spleen1	lncRNA	chr16	0.0503903	0.000656776	2.23	0.000865	16:29036613-16:31382470
ENSG00000225190	PLEKHM1	Brain_Hippocampus1	protein_coding	chr17	0.105906	2e-05	-8.27	0.00086	17:43056905-17:45876022
ENSG00000250616	AC012645.1	Brain_Nucleus_accumbens_basal_ganglia1	lncRNA	chr16	0.0658114	0.000228415	2.2	0.00086	16:29036613-16:31382470
ENSG00000099365	STX1B	Brain_Cerebellar_Hemisphere1	protein_coding	chr16	0.097393	2.62e-05	-5	0.000859	16:29036613-16:31382470
ENSG00000204348	DXO	Brain_Nucleus_accumbens_basal_ganglia1	protein_coding	chr6	0.114106	8.81e-07	1.86	0.000858	6:31571337-6:32682664
ENSG00000137441	FGFBP2	Colon_Sigmoid1	protein_coding	chr4	0.0776191	4.44e-07	-1.86	0.000858	4:15147446-4:15926136
ENSG00000038945	MSR1	Brain_Cortex1	protein_coding	chr8	0.0393279	0.00436634	1.87	0.000857	8:15991660-8:17387624
ENSG00000188725	SMIM15	Brain_Frontal_Cortex_BA91	protein_coding	chr5	0.0532659	0.00212037	1.31	0.000857	5:58524622-5:60935451
ENSG00000178852	EFCAB13	Brain_Substantia_nigra1	protein_coding	chr17	0.0729464	0.00365893	-1.95	0.000857	17:43056905-17:45876022
ENSG00000163689	C3orf67	Stomach1	protein_coding	chr3	0.0169648	0.0190056	-1.78	0.000856	3:58157850-3:60272829
ENSG00000235560	AC002310.1	Colon_Sigmoid1	lncRNA	chr16	0.0840225	1.42e-07	-1.34	0.000855	16:29036613-16:31382470
ENSG00000163346	PBXIP1	Colon_Transverse1	protein_coding	chr1	0.0194261	0.00741267	-1.86	0.000855	1:154770403-1:156336133
ENSG00000196917	HCAR1	Spleen1	protein_coding	chr12	0.0239452	0.0196679	1.86	0.000854	12:122009763-12:124976982
ENSG00000225190	PLEKHM1	Brain_Frontal_Cortex_BA91	protein_coding	chr17	0.222759	4.3e-11	-8.27	0.000853	17:43056905-17:45876022
ENSG00000178226	PRSS36	Brain_Putamen_basal_ganglia1	protein_coding	chr16	0.321734	7.37e-16	-4.06	0.000852	16:29036613-16:31382470
ENSG00000103549	RNF40	Colon_Sigmoid1	protein_coding	chr16	0.0526063	3.64e-05	-3.42	0.000852	16:29036613-16:31382470
ENSG00000160803	UBQLN4	Brain_Frontal_Cortex_BA91	protein_coding	chr1	0.0225817	0.0471498	2.12	0.000851	1:154770403-1:156336133
ENSG00000233002	AC005324.1	Brain_Cerebellum1	lncRNA	chr17	0.0947671	5.78e-06	-1.48	0.00085	17:15020965-17:16411522
ENSG00000162873	KLHDC8A	Brain_Cerebellum1	protein_coding	chr1	0.282791	1.18e-16	2	0.00085	1:204681068-1:205922403
ENSG00000260953	AC009093.4	Brain_Frontal_Cortex_BA91	lncRNA	chr16	0.261372	4.85e-13	1.76	0.000849	16:29036613-16:31382470
ENSG00000151229	SLC2A13	Brain_Cerebellum1	protein_coding	chr12	0.0377852	0.00479822	1.86	0.000846	12:39227446-12:40816185
ENSG00000169231	THBS3	Brain_Nucleus_accumbens_basal_ganglia1	protein_coding	chr1	0.0822089	3.52e-05	-1.56	0.000845	1:154770403-1:156336133
ENSG00000263293	AC068234.2	Brain_Hippocampus1	lncRNA	chr17	0.0300458	0.0259798	1.53	0.000842	17:43056905-17:45876022
ENSG00000118564	FBXL5	Brain_Caudate_basal_ganglia1	protein_coding	chr4	0.0252728	0.0268256	2.05	0.00084	4:15147446-4:15926136
ENSG00000183605	SFXN4	Brain_Spinal_cord_cervical_c-11	protein_coding	chr10	0.48577	1.26e-19	1.81	0.000839	10:120591693-10:122407323
ENSG00000275389	AC068790.9	Pancreas1	lncRNA	chr12	0.0126467	0.0497453	1.62	0.000839	12:122009763-12:124976982
ENSG00000228696	ARL17B	Colon_Sigmoid1	protein_coding	chr17	0.54026	2.89e-55	4.47	0.000837	17:43056905-17:45876022
ENSG00000179195	ZNF664	Colon_Sigmoid1	protein_coding	chr12	0.0470546	9.64e-05	-1.76	0.000834	12:122009763-12:124976982
ENSG00000007062	PROM1	Brain_Hippocampus1	protein_coding	chr4	0.0698655	0.000602087	-1.49	0.000833	4:15147446-4:15926136
ENSG00000204314	PRRT1	Colon_Transverse1	protein_coding	chr6	0.0947115	1.63e-09	-1.8	0.000833	6:31571337-6:32682664
ENSG00000178226	PRSS36	Liver1	protein_coding	chr16	0.037392	0.00513439	-4.58	0.000833	16:29036613-16:31382470
ENSG00000242686	AC107464.1	Brain_Cerebellar_Hemisphere1	lncRNA	chr4	0.360942	1.51e-18	1.68	0.000829	4:695146-4:1478711
ENSG00000151502	VPS26B	Whole_Blood1	protein_coding	chr11	0.0292073	8.66e-06	1.9	0.000826	11:133000260-11:134205993
ENSG00000163346	PBXIP1	Brain_Nucleus_accumbens_basal_ganglia1	protein_coding	chr1	0.0198263	0.0456321	-1.86	0.000825	1:154770403-1:156336133
ENSG00000178722	C5orf64	Brain_Hypothalamus1	lncRNA	chr5	0.280748	1.09e-13	1.8	0.000823	5:58524622-5:60935451
ENSG00000204396	VWA7	Colon_Transverse1	protein_coding	chr6	0.0167348	0.0130057	-1.78	0.000823	6:31571337-6:32682664
ENSG00000109743	BST1	Liver1	protein_coding	chr4	0.034915	0.00688258	1.64	0.000823	4:15147446-4:15926136
ENSG00000156219	ART3	Brain_Nucleus_accumbens_basal_ganglia1	protein_coding	chr4	0.0474324	0.00184803	-1.73	0.000817	4:77130707-4:79093979
ENSG00000178226	PRSS36	Brain_Anterior_cingulate_cortex_BA241	protein_coding	chr16	0.174416	1.42e-07	-4.13	0.000816	16:29036613-16:31382470
ENSG00000138759	FRAS1	Brain_Caudate_basal_ganglia1	protein_coding	chr4	0.0669244	0.000270368	1.82	0.000816	4:77130707-4:79093979
ENSG00000184144	CNTN2	Brain_Hippocampus1	protein_coding	chr1	0.0286296	0.0298093	-2.04	0.000816	1:204681068-1:205922403
ENSG00000168291	PDHB	Colon_Transverse1	protein_coding	chr3	0.146213	2.94e-14	1.87	0.000816	3:58157850-3:60272829
ENSG00000272360	AC116036.2	Stomach1	lncRNA	chr3	0.0799784	2.26e-07	-1.71	0.000816	3:58157850-3:60272829
ENSG00000156885	COX6A2	Brain_Cerebellar_Hemisphere1	protein_coding	chr16	0.0641698	0.000718549	-2.22	0.000815	16:29036613-16:31382470
ENSG00000138768	USO1	Brain_Cerebellum1	protein_coding	chr4	0.0951145	5.54e-06	-1.45	0.000813	4:77130707-4:79093979
ENSG00000163689	C3orf67	Colon_Transverse1	protein_coding	chr3	0.0302122	0.000812334	-1.79	0.000812	3:58157850-3:60272829
ENSG00000260911	AC135050.3	Whole_Blood1	lncRNA	chr16	0.187263	5.94e-32	-4.2	0.000812	16:29036613-16:31382470
ENSG00000174529	TMEM81	Brain_Hypothalamus1	protein_coding	chr1	0.045416	0.00526681	1.83	0.000807	1:204681068-1:205922403
ENSG00000163479	SSR2	Brain_Nucleus_accumbens_basal_ganglia1	protein_coding	chr1	0.0214401	0.0375819	2.03	0.000807	1:154770403-1:156336133
ENSG00000170160	CCDC144A	Colon_Transverse1	protein_coding	chr17	0.0182481	0.00947347	1.86	0.000807	17:15020965-17:16411522
ENSG00000276728	AC142472.1	Pituitary1	lncRNA	chr17	0.0574256	0.000196047	-2.24	0.000807	17:43056905-17:45876022
ENSG00000237541	HLA-DQA2	Spleen1	protein_coding	chr6	0.652469	1.51e-53	-1.77	0.000807	6:31571337-6:32682664
ENSG00000250091	DNAH10OS	Colon_Sigmoid1	lncRNA	chr12	0.221548	6.15e-19	1.77	0.000805	12:122009763-12:124976982
ENSG00000204396	VWA7	Spleen1	protein_coding	chr6	0.0174484	0.0468223	-1.83	0.000805	6:31571337-6:32682664
ENSG00000204290	BTNL2	Brain_Hippocampus1	protein_coding	chr6	0.170184	3.67e-08	1.82	0.000803	6:31571337-6:32682664
ENSG00000178852	EFCAB13	Brain_Nucleus_accumbens_basal_ganglia1	protein_coding	chr17	0.159635	3.85e-09	-1.72	0.000803	17:43056905-17:45876022
ENSG00000143552	NUP210L	Pituitary1	protein_coding	chr1	0.133052	7.19e-09	0.76	0.000803	1:154770403-1:156336133
ENSG00000242686	AC107464.1	Whole_Blood1	lncRNA	chr4	0.0831168	2.73e-14	0.446	0.000802	4:695146-4:1478711
ENSG00000155975	VPS37A	Brain_Cortex1	protein_coding	chr8	0.0494135	0.00135794	-1.83	0.000801	8:15991660-8:17387624
ENSG00000163689	C3orf67	Brain_Cerebellum1	protein_coding	chr3	0.0638406	0.00022344	-1.81	0.0008	3:58157850-3:60272829
ENSG00000110801	PSMD9	Brain_Caudate_basal_ganglia1	protein_coding	chr12	0.0288211	0.0179564	1.81	0.000798	12:122009763-12:124976982
ENSG00000204356	NELFE	Brain_Nucleus_accumbens_basal_ganglia1	protein_coding	chr6	0.0563233	0.000671864	-1.82	0.000798	6:31571337-6:32682664
ENSG00000069275	NUCKS1	Colon_Transverse1	protein_coding	chr1	0.0451785	3.95e-05	-2.57	0.000798	1:204681068-1:205922403
ENSG00000155975	VPS37A	Pancreas1	protein_coding	chr8	0.0224647	0.00875028	-1.83	0.000798	8:15991660-8:17387624
ENSG00000143603	KCNN3	Brain_Hippocampus1	protein_coding	chr1	0.116258	7.41e-06	-1.63	0.000797	1:154770403-1:156336133
ENSG00000170382	LRRN2	Brain_Spinal_cord_cervical_c-11	protein_coding	chr1	0.0454104	0.0165861	1.66	0.000797	1:204681068-1:205922403
ENSG00000179965	ZNF771	Whole_Blood1	protein_coding	chr16	0.0112874	0.00591104	-1.71	0.000797	16:29036613-16:31382470
ENSG00000272360	AC116036.2	Brain_Hippocampus1	lncRNA	chr3	0.0707733	0.000552907	-1.83	0.000796	3:58157850-3:60272829
ENSG00000119242	CCDC92	Colon_Transverse1	protein_coding	chr12	0.136594	2.36e-13	1.76	0.000796	12:122009763-12:124976982
ENSG00000204388	HSPA1B	Stomach1	protein_coding	chr6	0.039712	0.000306882	1.6	0.000796	6:31571337-6:32682664
ENSG00000116586	LAMTOR2	Brain_Spinal_cord_cervical_c-11	protein_coding	chr1	0.0494977	0.0122827	-1.97	0.000795	1:154770403-1:156336133
ENSG00000176597	B3GNT5	Brain_Spinal_cord_cervical_c-11	protein_coding	chr3	0.0515051	0.0106027	1.92	0.000794	3:181511166-3:183769683
ENSG00000160783	PMF1	Whole_Blood1	protein_coding	chr1	0.0298926	6.77e-06	1.82	0.000794	1:154770403-1:156336133
ENSG00000136243	NUPL2	Liver1	protein_coding	chr7	0.043112	0.00261794	1.18	0.000793	7:22508611-7:23469560
ENSG00000225190	PLEKHM1	Brain_Anterior_cingulate_cortex_BA241	protein_coding	chr17	0.198664	1.54e-08	-8.17	0.000792	17:43056905-17:45876022
ENSG00000151923	TIAL1	Brain_Caudate_basal_ganglia1	protein_coding	chr10	0.0378377	0.00657097	-1.78	0.000792	10:120591693-10:122407323
ENSG00000149929	HIRIP3	Brain_Cerebellar_Hemisphere1	protein_coding	chr16	0.0613923	0.000946491	1.99	0.000792	16:29036613-16:31382470
ENSG00000103510	KAT8	Brain_Cerebellar_Hemisphere1	protein_coding	chr16	0.361796	1.34e-18	-4.95	0.000792	16:29036613-16:31382470
ENSG00000204248	COL11A2	Brain_Hippocampus1	protein_coding	chr6	0.138228	8.8e-07	-1.77	0.000792	6:31571337-6:32682664
ENSG00000237541	HLA-DQA2	Stomach1	protein_coding	chr6	0.637585	5.98e-73	-1.22	0.00079	6:31571337-6:32682664
ENSG00000197653	DNAH10	Brain_Cerebellum1	protein_coding	chr12	0.0785157	3.97e-05	1.94	0.000789	12:122009763-12:124976982
ENSG00000155975	VPS37A	Colon_Sigmoid1	protein_coding	chr8	0.0737912	8.75e-07	-1.82	0.000789	8:15991660-8:17387624
ENSG00000274682	AC015540.1	Brain_Cerebellum1	lncRNA	chr12	0.0282344	0.0150181	-1.82	0.000788	12:40816185-12:41658193
ENSG00000186834	HEXIM1	Brain_Cortex1	protein_coding	chr17	0.0677978	0.000162904	-1.9	0.000786	17:43056905-17:45876022
ENSG00000198825	INPP5F	Small_Intestine_Terminal_Ileum1	protein_coding	chr10	0.0337499	0.0152435	1.82	0.000786	10:120591693-10:122407323
ENSG00000073969	NSF	Stomach1	protein_coding	chr17	0.0433652	0.000159777	-3.96	0.000786	17:43056905-17:45876022
ENSG00000275389	AC068790.9	Brain_Cerebellar_Hemisphere1	lncRNA	chr12	0.0725749	0.000311989	-1.33	0.000783	12:122009763-12:124976982
ENSG00000141279	NPEPPS	Whole_Blood1	protein_coding	chr17	0.0474357	1.23e-08	0.509	0.000781	17:43056905-17:45876022
ENSG00000250616	AC012645.1	Spleen1	lncRNA	chr16	0.0317358	0.00712871	-1.26	0.000778	16:29036613-16:31382470
ENSG00000180834	MAP6D1	Brain_Cerebellum1	protein_coding	chr3	0.295284	1.87e-17	1.81	0.000777	3:181511166-3:183769683
ENSG00000136068	FLNB	Brain_Hypothalamus1	protein_coding	chr3	0.0820204	0.000152991	-1.72	0.000776	3:58157850-3:60272829
ENSG00000274292	AC084018.2	Brain_Cerebellum1	lncRNA	chr12	0.307722	2.91e-18	-1.72	0.000775	12:122009763-12:124976982
ENSG00000204420	MPIG6B	Brain_Nucleus_accumbens_basal_ganglia1	protein_coding	chr6	0.156657	5.53e-09	1.8	0.000775	6:31571337-6:32682664
ENSG00000204315	FKBPL	Brain_Cortex1	protein_coding	chr6	0.0544584	0.000758699	-1.11	0.000774	6:31571337-6:32682664
ENSG00000185829	ARL17A	Stomach1	protein_coding	chr17	0.393787	7.09e-37	3.92	0.000774	17:43056905-17:45876022
ENSG00000180209	MYLPF	Colon_Sigmoid1	protein_coding	chr16	0.0312257	0.00155788	1.82	0.000773	16:29036613-16:31382470
ENSG00000141279	NPEPPS	Small_Intestine_Terminal_Ileum1	protein_coding	chr17	0.113071	5.72e-06	0.911	0.000773	17:43056905-17:45876022
ENSG00000138771	SHROOM3	Brain_Cortex1	protein_coding	chr4	0.0297526	0.0133934	-0.839	0.000771	4:77130707-4:79093979
ENSG00000204310	AGPAT1	Brain_Nucleus_accumbens_basal_ganglia1	protein_coding	chr6	0.0390901	0.00479527	1.79	0.000771	6:31571337-6:32682664
ENSG00000270361	AL451085.1	Pituitary1	lncRNA	chr1	0.0336847	0.00458763	-1.63	0.00077	1:154770403-1:156336133
ENSG00000103502	CDIPT	Stomach1	protein_coding	chr16	0.0166709	0.0200803	-2.33	0.00077	16:29036613-16:31382470
ENSG00000078081	LAMP3	Pancreas1	protein_coding	chr3	0.0910863	7.66e-08	-1.81	0.000769	3:181511166-3:183769683
ENSG00000175727	MLXIP	Brain_Cerebellum1	protein_coding	chr12	0.0560195	0.000559877	-1.54	0.000766	12:122009763-12:124976982
ENSG00000174529	TMEM81	Brain_Cerebellum1	protein_coding	chr1	0.200524	1.06e-11	1.81	0.000766	1:204681068-1:205922403
ENSG00000197471	SPN	Brain_Nucleus_accumbens_basal_ganglia1	protein_coding	chr16	0.0225835	0.0327824	1.3	0.000766	16:29036613-16:31382470
ENSG00000178226	PRSS36	Brain_Amygdala1	protein_coding	chr16	0.158715	2.93e-06	-4.56	0.000765	16:29036613-16:31382470
ENSG00000119242	CCDC92	Brain_Cerebellum1	protein_coding	chr12	0.0724124	8.15e-05	1.7	0.000765	12:122009763-12:124976982
ENSG00000177628	GBA	Brain_Hypothalamus1	protein_coding	chr1	0.022834	0.0491836	1.15	0.000765	1:154770403-1:156336133
ENSG00000139726	DENR	Small_Intestine_Terminal_Ileum1	protein_coding	chr12	0.0265208	0.0317905	-1.8	0.000765	12:122009763-12:124976982
ENSG00000169957	ZNF768	Brain_Cortex1	protein_coding	chr16	0.0224491	0.0320134	-3.05	0.000763	16:29036613-16:31382470
ENSG00000163545	NUAK2	Brain_Spinal_cord_cervical_c-11	protein_coding	chr1	0.0640683	0.00424125	1.62	0.000761	1:204681068-1:205922403
ENSG00000143603	KCNN3	Brain_Amygdala1	protein_coding	chr1	0.134792	1.87e-05	-1.63	0.000759	1:154770403-1:156336133
ENSG00000167395	ZNF646	Pituitary1	protein_coding	chr16	0.0295246	0.00802523	0.619	0.000759	16:29036613-16:31382470
ENSG00000163689	C3orf67	Brain_Cortex1	protein_coding	chr3	0.0405667	0.00378098	-1.8	0.000757	3:58157850-3:60272829
ENSG00000177234	LINC01561	Brain_Cerebellar_Hemisphere1	lncRNA	chr10	0.637388	5.89e-40	1.79	0.000756	10:120591693-10:122407323
ENSG00000185829	ARL17A	Brain_Cerebellar_Hemisphere1	protein_coding	chr17	0.581608	1.46e-34	-4.57	0.000755	17:43056905-17:45876022
ENSG00000118804	STBD1	Brain_Cerebellum1	protein_coding	chr4	0.169312	6.04e-10	0.144	0.000755	4:77130707-4:79093979
ENSG00000204305	AGER	Pancreas1	protein_coding	chr6	0.153384	1.27e-12	-1.79	0.000755	6:31571337-6:32682664
ENSG00000141027	NCOR1	Whole_Blood1	protein_coding	chr17	0.170425	5.87e-29	3.65	0.000755	17:15020965-17:16411522
ENSG00000204310	AGPAT1	Brain_Hypothalamus1	protein_coding	chr6	0.0548317	0.00211625	1.65	0.000754	6:31571337-6:32682664
ENSG00000168993	CPLX1	Brain_Spinal_cord_cervical_c-11	protein_coding	chr4	0.0352941	0.0351537	-2.07	0.000753	4:695146-4:1478711
ENSG00000278133	AC135050.6	Pancreas1	lncRNA	chr16	0.0770738	8.41e-07	3.87	0.000752	16:29036613-16:31382470
ENSG00000160691	SHC1	Whole_Blood1	protein_coding	chr1	0.117695	6.11e-20	1.79	0.000752	1:154770403-1:156336133
ENSG00000160803	UBQLN4	Brain_Caudate_basal_ganglia1	protein_coding	chr1	0.149756	2.49e-08	2.04	0.000751	1:154770403-1:156336133
ENSG00000264589	MAPT-AS1	Brain_Putamen_basal_ganglia1	lncRNA	chr17	0.155025	1.08e-07	5.6	0.000751	17:43056905-17:45876022
ENSG00000163374	YY1AP1	Pituitary1	protein_coding	chr1	0.0223932	0.0211919	-0.191	0.00075	1:154770403-1:156336133
ENSG00000250616	AC012645.1	Brain_Anterior_cingulate_cortex_BA241	lncRNA	chr16	0.0359038	0.021527	2.19	0.000749	16:29036613-16:31382470
ENSG00000213719	CLIC1	Liver1	protein_coding	chr6	0.0665127	0.000169303	-1.78	0.000749	6:31571337-6:32682664
ENSG00000130921	C12orf65	Stomach1	protein_coding	chr12	0.080694	1.98e-07	1.84	0.000749	12:122009763-12:124976982
ENSG00000163689	C3orf67	Brain_Anterior_cingulate_cortex_BA241	protein_coding	chr3	0.0314602	0.0316177	-1.79	0.000748	3:58157850-3:60272829
ENSG00000163479	SSR2	Brain_Caudate_basal_ganglia1	protein_coding	chr1	0.0672283	0.00026152	2.04	0.000748	1:154770403-1:156336133
ENSG00000162877	PM20D1	Brain_Frontal_Cortex_BA91	protein_coding	chr1	0.259484	6.07e-13	-1.43	0.000748	1:204681068-1:205922403
ENSG00000141279	NPEPPS	Brain_Substantia_nigra1	protein_coding	chr17	0.0800197	0.00229176	0.508	0.000748	17:43056905-17:45876022
ENSG00000224505	AC138150.1	Colon_Sigmoid1	lncRNA	chr17	0.0126162	0.0453452	1.37	0.000748	17:43056905-17:45876022
ENSG00000204396	VWA7	Pituitary1	protein_coding	chr6	0.0813595	8.16e-06	-1.69	0.000747	6:31571337-6:32682664
ENSG00000214650	AC073592.1	Spleen1	lncRNA	chr12	0.017586	0.0459562	-1.78	0.000747	12:122009763-12:124976982
ENSG00000156219	ART3	Brain_Hypothalamus1	protein_coding	chr4	0.0349888	0.0145869	-1.39	0.000746	4:77130707-4:79093979
ENSG00000103472	RRN3P2	Brain_Nucleus_accumbens_basal_ganglia1	lncRNA	chr16	0.055436	0.000743183	1.57	0.000746	16:29036613-16:31382470
ENSG00000180834	MAP6D1	Brain_Spinal_cord_cervical_c-11	protein_coding	chr3	0.263841	7.71e-10	1.54	0.000742	3:181511166-3:183769683
ENSG00000107651	SEC23IP	Colon_Sigmoid1	protein_coding	chr10	0.0757084	6.23e-07	1.77	0.000742	10:120591693-10:122407323
ENSG00000178722	C5orf64	Brain_Cerebellum1	lncRNA	chr5	0.217684	1.08e-12	1.78	0.000739	5:58524622-5:60935451
ENSG00000204410	MSH5	Whole_Blood1	protein_coding	chr6	0.0482311	9.23e-09	-1.78	0.000739	6:31571337-6:32682664
ENSG00000184445	KNTC1	Whole_Blood1	protein_coding	chr12	0.0196278	0.000275234	-1.79	0.000738	12:122009763-12:124976982
ENSG00000204396	VWA7	Brain_Anterior_cingulate_cortex_BA241	protein_coding	chr6	0.0856267	0.000322406	-1.94	0.000737	6:31571337-6:32682664
ENSG00000185829	ARL17A	Colon_Sigmoid1	protein_coding	chr17	0.361985	1.08e-32	1.76	0.000737	17:43056905-17:45876022
ENSG00000173171	MTX1	Colon_Transverse1	protein_coding	chr1	0.0171703	0.0118694	-1.78	0.000736	1:154770403-1:156336133
ENSG00000180834	MAP6D1	Small_Intestine_Terminal_Ileum1	protein_coding	chr3	0.0666081	0.000585424	-1.78	0.000736	3:181511166-3:183769683
ENSG00000178722	C5orf64	Brain_Cerebellar_Hemisphere1	lncRNA	chr5	0.181503	4.15e-09	1.77	0.000735	5:58524622-5:60935451
ENSG00000197653	DNAH10	Brain_Cortex1	protein_coding	chr12	0.0352549	0.00701913	1.64	0.000733	12:122009763-12:124976982
ENSG00000138758	SEPTIN11	Colon_Sigmoid1	protein_coding	chr4	0.0611249	8.16e-06	1.63	0.000731	4:77130707-4:79093979
ENSG00000038945	MSR1	Brain_Hippocampus1	protein_coding	chr8	0.0287733	0.0293954	1.78	0.00073	8:15991660-8:17387624
ENSG00000120088	CRHR1	Brain_Cortex1	protein_coding	chr17	0.0192329	0.0473577	-8.72	0.000729	17:43056905-17:45876022
ENSG00000225190	PLEKHM1	Brain_Putamen_basal_ganglia1	protein_coding	chr17	0.271433	3.26e-13	-8.14	0.000727	17:43056905-17:45876022
ENSG00000177234	LINC01561	Brain_Spinal_cord_cervical_c-11	lncRNA	chr10	0.0641728	0.00420913	-1.76	0.000727	10:120591693-10:122407323
ENSG00000280789	PAGR1	Colon_Sigmoid1	protein_coding	chr16	0.0169372	0.0202585	2.26	0.000727	16:29036613-16:31382470
ENSG00000204290	BTNL2	Brain_Cerebellum1	protein_coding	chr6	0.16821	6.95e-10	1.81	0.000726	6:31571337-6:32682664
ENSG00000214894	LINC00243	Colon_Transverse1	lncRNA	chr6	0.0149647	0.0188978	-1.71	0.000726	6:31571337-6:32682664
ENSG00000111325	OGFOD2	Brain_Hypothalamus1	protein_coding	chr12	0.0456468	0.00515007	-1.77	0.000725	12:122009763-12:124976982
ENSG00000160803	UBQLN4	Brain_Cortex1	protein_coding	chr1	0.0611471	0.000350863	1.86	0.000723	1:154770403-1:156336133
ENSG00000182782	HCAR2	Stomach1	protein_coding	chr12	0.0993543	6.62e-09	-1.75	0.00072	12:122009763-12:124976982
ENSG00000198502	HLA-DRB5	Whole_Blood1	protein_coding	chr6	0.676287	9.28e-166	1.76	0.00072	6:31571337-6:32682664
ENSG00000051825	MPHOSPH9	Brain_Hypothalamus1	protein_coding	chr12	0.0333867	0.017083	-1.77	0.000719	12:122009763-12:124976982
ENSG00000204290	BTNL2	Colon_Sigmoid1	protein_coding	chr6	0.0854156	1.11e-07	-0.88	0.000719	6:31571337-6:32682664
ENSG00000099385	BCL7C	Colon_Transverse1	protein_coding	chr16	0.0207759	0.00560346	-0.167	0.000719	16:29036613-16:31382470
ENSG00000178722	C5orf64	Brain_Anterior_cingulate_cortex_BA241	lncRNA	chr5	0.305273	4.01e-13	1.77	0.000718	5:58524622-5:60935451
ENSG00000233002	AC005324.1	Brain_Frontal_Cortex_BA91	lncRNA	chr17	0.288785	1.75e-14	-1.4	0.000718	17:15020965-17:16411522
ENSG00000182782	HCAR2	Liver1	protein_coding	chr12	0.0313969	0.0104556	-1.75	0.000718	12:122009763-12:124976982
ENSG00000166105	GLB1L3	Spleen1	protein_coding	chr11	0.0287474	0.0104977	-1.82	0.000718	11:133000260-11:134205993
ENSG00000242252	BGLAP	Stomach1	protein_coding	chr1	0.100263	5.6e-09	1.98	0.000718	1:154770403-1:156336133
ENSG00000278133	AC135050.6	Pituitary1	lncRNA	chr16	0.107549	2.4e-07	3.7	0.000717	16:29036613-16:31382470
ENSG00000204344	STK19	Brain_Anterior_cingulate_cortex_BA241	protein_coding	chr6	0.0605125	0.00267039	-1.24	0.000716	6:31571337-6:32682664
ENSG00000103549	RNF40	Whole_Blood1	protein_coding	chr16	0.106403	4.49e-18	-2.78	0.000716	16:29036613-16:31382470
ENSG00000178722	C5orf64	Brain_Caudate_basal_ganglia1	lncRNA	chr5	0.303402	8.71e-17	1.72	0.000715	5:58524622-5:60935451
ENSG00000049167	ERCC8	Colon_Sigmoid1	protein_coding	chr5	0.0753379	6.66e-07	-1.15	0.000714	5:58524622-5:60935451
ENSG00000163872	YEATS2	Spleen1	protein_coding	chr3	0.0326235	0.00635715	-1.76	0.000713	3:181511166-3:183769683
ENSG00000143622	RIT1	Liver1	protein_coding	chr1	0.107041	1.41e-06	1.78	0.000712	1:154770403-1:156336133
ENSG00000173171	MTX1	Pituitary1	protein_coding	chr1	0.0244506	0.015981	-1.75	0.000712	1:154770403-1:156336133
ENSG00000149922	TBX6	Brain_Cerebellar_Hemisphere1	protein_coding	chr16	0.19556	8.96e-10	2.03	0.000708	16:29036613-16:31382470
ENSG00000182782	HCAR2	Spleen1	protein_coding	chr12	0.0659529	9.09e-05	-1.75	0.000708	12:122009763-12:124976982
ENSG00000160685	ZBTB7B	Colon_Transverse1	protein_coding	chr1	0.0123172	0.0333073	1.75	0.000707	1:154770403-1:156336133
ENSG00000204308	RNF5	Colon_Transverse1	protein_coding	chr6	0.292977	2.14e-29	-1.61	0.000705	6:31571337-6:32682664
ENSG00000270361	AL451085.1	Brain_Cerebellum1	lncRNA	chr1	0.0430873	0.00256307	-1.81	0.000704	1:154770403-1:156336133
ENSG00000143603	KCNN3	Brain_Frontal_Cortex_BA91	protein_coding	chr1	0.117506	3.42e-06	-1.62	0.000704	1:154770403-1:156336133
ENSG00000213722	DDAH2	Brain_Nucleus_accumbens_basal_ganglia1	protein_coding	chr6	0.0355861	0.0071739	1.75	0.000704	6:31571337-6:32682664
ENSG00000168297	PXK	Brain_Spinal_cord_cervical_c-11	protein_coding	chr3	0.0994536	0.000322041	-1.75	0.000704	3:58157850-3:60272829
ENSG00000138771	SHROOM3	Spleen1	protein_coding	chr4	0.0340262	0.00530642	-1.54	0.000704	4:77130707-4:79093979
ENSG00000204308	RNF5	Spleen1	protein_coding	chr6	0.143175	3.86e-09	-1.7	0.000704	6:31571337-6:32682664
ENSG00000109099	PMP22	Brain_Cerebellar_Hemisphere1	protein_coding	chr17	0.0327622	0.0165244	0.794	0.000703	17:15020965-17:16411522
ENSG00000163545	NUAK2	Brain_Hippocampus1	protein_coding	chr1	0.107419	1.73e-05	-1.74	0.000703	1:204681068-1:205922403
ENSG00000149922	TBX6	Pancreas1	protein_coding	chr16	0.100227	1.58e-08	-1.37	0.000702	16:29036613-16:31382470
ENSG00000213676	ATF6B	Brain_Caudate_basal_ganglia1	protein_coding	chr6	0.148491	2.88e-08	-1.72	0.000701	6:31571337-6:32682664
ENSG00000204348	DXO	Brain_Substantia_nigra1	protein_coding	chr6	0.0697144	0.00453109	1.75	0.000701	6:31571337-6:32682664
ENSG00000185829	ARL17A	Brain_Putamen_basal_ganglia1	protein_coding	chr17	0.280291	1.15e-13	-8.51	0.000699	17:43056905-17:45876022
ENSG00000136235	GPNMB	Small_Intestine_Terminal_Ileum1	protein_coding	chr7	0.165713	2.48e-08	2.32	0.000699	7:22508611-7:23469560
ENSG00000133065	SLC41A1	Stomach1	protein_coding	chr1	0.0429161	0.000173118	3.19	0.000699	1:204681068-1:205922403
ENSG00000204308	RNF5	Pituitary1	protein_coding	chr6	0.11953	4.66e-08	-1.6	0.000698	6:31571337-6:32682664
ENSG00000274292	AC084018.2	Brain_Anterior_cingulate_cortex_BA241	lncRNA	chr12	0.100424	9.2e-05	-1.76	0.000696	12:122009763-12:124976982
ENSG00000224505	AC138150.1	Pancreas1	lncRNA	chr17	0.0205553	0.0121915	1.22	0.000696	17:43056905-17:45876022
ENSG00000089041	P2RX7	Pituitary1	protein_coding	chr12	0.0210487	0.0255143	-1.72	0.000696	12:122009763-12:124976982
ENSG00000143603	KCNN3	Brain_Cerebellum1	protein_coding	chr1	0.0766456	4.95e-05	-1.55	0.000694	1:154770403-1:156336133
ENSG00000179918	SEPHS2	Brain_Nucleus_accumbens_basal_ganglia1	protein_coding	chr16	0.0279339	0.0174337	-1.58	0.000694	16:29036613-16:31382470
ENSG00000204351	SKIV2L	Spleen1	protein_coding	chr6	0.410663	1.21e-27	1.56	0.000694	6:31571337-6:32682664
ENSG00000274292	AC084018.2	Brain_Nucleus_accumbens_basal_ganglia1	lncRNA	chr12	0.154132	7.52e-09	-1.74	0.000693	12:122009763-12:124976982
ENSG00000090975	PITPNM2	Spleen1	protein_coding	chr12	0.0310775	0.00776161	-1.74	0.000693	12:122009763-12:124976982
ENSG00000260953	AC009093.4	Brain_Cortex1	lncRNA	chr16	0.304435	9.96e-18	1.39	0.000692	16:29036613-16:31382470
ENSG00000184144	CNTN2	Brain_Frontal_Cortex_BA91	protein_coding	chr1	0.0367304	0.0110617	-1.48	0.000692	1:204681068-1:205922403
ENSG00000073969	NSF	Whole_Blood1	protein_coding	chr17	0.0447003	3.3e-08	-4.63	0.000692	17:43056905-17:45876022
ENSG00000237541	HLA-DQA2	Brain_Cortex1	protein_coding	chr6	0.491881	1.14e-31	-1.25	0.00069	6:31571337-6:32682664
ENSG00000163346	PBXIP1	Brain_Spinal_cord_cervical_c-11	protein_coding	chr1	0.0477898	0.013923	-1.49	0.00069	1:154770403-1:156336133
ENSG00000233002	AC005324.1	Brain_Caudate_basal_ganglia1	lncRNA	chr17	0.364647	1.16e-20	-1.49	0.000689	17:15020965-17:16411522
ENSG00000274292	AC084018.2	Brain_Frontal_Cortex_BA91	lncRNA	chr12	0.177973	6.08e-09	-1.75	0.000689	12:122009763-12:124976982
ENSG00000168297	PXK	Brain_Nucleus_accumbens_basal_ganglia1	protein_coding	chr3	0.174445	6.24e-10	-1.74	0.000689	3:58157850-3:60272829
ENSG00000166582	CENPV	Brain_Spinal_cord_cervical_c-11	protein_coding	chr17	0.547382	4.34e-23	3.24	0.000689	17:15020965-17:16411522
ENSG00000109956	B3GAT1	Brain_Substantia_nigra1	protein_coding	chr11	0.0446911	0.0239537	-1.74	0.000689	11:133000260-11:134205993
ENSG00000111325	OGFOD2	Pituitary1	protein_coding	chr12	0.0363897	0.00319505	-1.74	0.000689	12:122009763-12:124976982
ENSG00000120071	KANSL1	Brain_Cortex1	protein_coding	chr17	0.414173	2.32e-25	-5.53	0.000688	17:43056905-17:45876022
ENSG00000228649	SNHG26	Brain_Substantia_nigra1	lncRNA	chr7	0.163886	7.91e-06	-1.5	0.000688	7:22508611-7:23469560
ENSG00000240219	AL512306.2	Pituitary1	lncRNA	chr1	0.137625	3.8e-09	-2.41	0.000688	1:204681068-1:205922403
ENSG00000204475	NCR3	Whole_Blood1	protein_coding	chr6	0.133092	1.61e-22	-1.73	0.000687	6:31571337-6:32682664
ENSG00000145217	SLC26A1	Colon_Sigmoid1	protein_coding	chr4	0.567624	1.74e-59	2.85	0.000686	4:695146-4:1478711
ENSG00000051825	MPHOSPH9	Pituitary1	protein_coding	chr12	0.06211	0.000105426	-1.76	0.000685	12:122009763-12:124976982
ENSG00000273181	AC131235.3	Stomach1	lncRNA	chr3	0.0669281	2.37e-06	-1.73	0.000685	3:181511166-3:183769683
ENSG00000187800	PEAR1	Colon_Transverse1	protein_coding	chr1	0.0162818	0.0143059	1.73	0.000684	1:154770403-1:156336133
ENSG00000276790	AC068234.3	Brain_Amygdala1	lncRNA	chr17	0.0353666	0.0328229	1.29	0.000682	17:43056905-17:45876022
ENSG00000267414	AC120049.1	Brain_Amygdala1	lncRNA	chr18	0.0507057	0.010297	1.74	0.00068	18:39892648-18:42921854
ENSG00000176383	B3GNT4	Brain_Cerebellum1	protein_coding	chr12	0.0379312	0.00471586	1.31	0.00068	12:122009763-12:124976982
ENSG00000139725	RHOF	Colon_Sigmoid1	protein_coding	chr12	0.0438815	0.000168112	-1.73	0.000679	12:122009763-12:124976982
ENSG00000228696	ARL17B	Whole_Blood1	protein_coding	chr17	0.378247	5.86e-71	3.83	0.000679	17:43056905-17:45876022
ENSG00000150967	ABCB9	Brain_Frontal_Cortex_BA91	protein_coding	chr12	0.0222921	0.0486051	-1.76	0.000678	12:122009763-12:124976982
ENSG00000141279	NPEPPS	Pancreas1	protein_coding	chr17	0.0356428	0.00092158	0.497	0.000678	17:43056905-17:45876022
ENSG00000173171	MTX1	Whole_Blood1	protein_coding	chr1	0.0214028	0.000144579	-1.73	0.000678	1:154770403-1:156336133
ENSG00000175193	PARL	Brain_Frontal_Cortex_BA91	protein_coding	chr3	0.0395658	0.00831707	2.05	0.000677	3:181511166-3:183769683
ENSG00000073969	NSF	Spleen1	protein_coding	chr17	0.0210102	0.0290089	-2.97	0.000676	17:43056905-17:45876022
ENSG00000215375	MYL5	Brain_Putamen_basal_ganglia1	protein_coding	chr4	0.0321426	0.0193192	0.781	0.000675	4:695146-4:1478711
ENSG00000007062	PROM1	Brain_Substantia_nigra1	protein_coding	chr4	0.197256	7.43e-07	-1.56	0.000675	4:15147446-4:15926136
ENSG00000274427	AC145423.2	Spleen1	lncRNA	chr12	0.031726	0.00713768	-1.71	0.000675	12:122009763-12:124976982
ENSG00000141279	NPEPPS	Brain_Amygdala1	protein_coding	chr17	0.150409	5.6e-06	0.751	0.000674	17:43056905-17:45876022
ENSG00000141279	NPEPPS	Brain_Cerebellum1	protein_coding	chr17	0.118799	3.21e-07	0.195	0.000674	17:43056905-17:45876022
ENSG00000204392	LSM2	Colon_Transverse1	protein_coding	chr6	0.0436643	5.35e-05	1.66	0.000674	6:31571337-6:32682664
ENSG00000204267	TAP2	Pancreas1	protein_coding	chr6	0.109318	3.26e-09	-1.7	0.000674	6:31571337-6:32682664
ENSG00000267198	AC091132.4	Brain_Amygdala1	lncRNA	chr17	0.16714	1.51e-06	-3.46	0.000672	17:43056905-17:45876022
ENSG00000180096	SEPTIN1	Brain_Caudate_basal_ganglia1	protein_coding	chr16	0.18015	6.93e-10	-1.46	0.000672	16:29036613-16:31382470
ENSG00000127415	IDUA	Brain_Putamen_basal_ganglia1	protein_coding	chr4	0.0907714	6.54e-05	-2.23	0.000672	4:695146-4:1478711
ENSG00000149929	HIRIP3	Brain_Substantia_nigra1	protein_coding	chr16	0.0517145	0.0149633	1.96	0.000672	16:29036613-16:31382470
ENSG00000174938	SEZ6L2	Pancreas1	protein_coding	chr16	0.0675588	4.23e-06	-1.93	0.000672	16:29036613-16:31382470
ENSG00000162873	KLHDC8A	Brain_Caudate_basal_ganglia1	protein_coding	chr1	0.116288	1.14e-06	1.85	0.000671	1:204681068-1:205922403
ENSG00000156219	ART3	Brain_Cerebellar_Hemisphere1	protein_coding	chr4	0.255378	9.87e-13	-3.98	0.000671	4:77130707-4:79093979
ENSG00000069275	NUCKS1	Brain_Cerebellum1	protein_coding	chr1	0.0597111	0.000362927	-3.72	0.000671	1:204681068-1:205922403
ENSG00000185499	MUC1	Brain_Cerebellum1	protein_coding	chr1	0.0808532	3.01e-05	2.74	0.00067	1:154770403-1:156336133
ENSG00000232629	HLA-DQB2	Stomach1	protein_coding	chr6	0.646125	1.28e-74	-1.2	0.00067	6:31571337-6:32682664
ENSG00000141279	NPEPPS	Brain_Hippocampus1	protein_coding	chr17	0.11436	8.89e-06	0.508	0.000669	17:43056905-17:45876022
ENSG00000143603	KCNN3	Pituitary1	protein_coding	chr1	0.116452	7.11e-08	1.84	0.000669	1:154770403-1:156336133
ENSG00000099385	BCL7C	Brain_Putamen_basal_ganglia1	protein_coding	chr16	0.0299576	0.0239997	-0.303	0.000668	16:29036613-16:31382470
ENSG00000182580	EPHB3	Colon_Sigmoid1	protein_coding	chr3	0.069061	2.02e-06	1.68	0.000666	3:181511166-3:183769683
ENSG00000136068	FLNB	Brain_Caudate_basal_ganglia1	protein_coding	chr3	0.0818198	5.27e-05	-1.72	0.000665	3:58157850-3:60272829
ENSG00000180096	SEPTIN1	Brain_Putamen_basal_ganglia1	protein_coding	chr16	0.197798	1.23e-09	-1.62	0.000665	16:29036613-16:31382470
ENSG00000181625	SLX1B	Brain_Cerebellum1	protein_coding	chr16	0.167391	7.72e-10	1.87	0.000664	16:29036613-16:31382470
ENSG00000273133	AC116651.1	Brain_Hippocampus1	lncRNA	chr4	0.182563	1.04e-08	-1.56	0.000664	4:15147446-4:15926136
ENSG00000240053	LY6G5B	Brain_Spinal_cord_cervical_c-11	protein_coding	chr6	0.219919	3.05e-08	1.11	0.000664	6:31571337-6:32682664
ENSG00000143603	KCNN3	Brain_Caudate_basal_ganglia1	protein_coding	chr1	0.0728083	0.000141903	-1.6	0.000663	1:154770403-1:156336133
ENSG00000125459	MSTO1	Brain_Cerebellum1	protein_coding	chr1	0.232345	1.47e-13	0.492	0.000663	1:154770403-1:156336133
ENSG00000136068	FLNB	Brain_Hippocampus1	protein_coding	chr3	0.0498519	0.0039428	-1.72	0.000663	3:58157850-3:60272829
ENSG00000275413	AC002553.2	Liver1	lncRNA	chr17	0.0444985	0.00222467	-0.623	0.000663	17:15020965-17:16411522
ENSG00000177234	LINC01561	Brain_Cerebellum1	lncRNA	chr10	0.637883	1.52e-47	1.72	0.000662	10:120591693-10:122407323
ENSG00000103549	RNF40	Brain_Cerebellum1	protein_coding	chr16	0.182176	1.16e-10	-3.72	0.000662	16:29036613-16:31382470
ENSG00000169955	ZNF747	Brain_Spinal_cord_cervical_c-11	protein_coding	chr16	0.046931	0.0148301	0.975	0.000662	16:29036613-16:31382470
ENSG00000160685	ZBTB7B	Small_Intestine_Terminal_Ileum1	protein_coding	chr1	0.032271	0.0176978	1.72	0.000662	1:154770403-1:156336133
ENSG00000145217	SLC26A1	Colon_Transverse1	protein_coding	chr4	0.353157	1.66e-36	2.15	0.000661	4:695146-4:1478711
ENSG00000180834	MAP6D1	Brain_Putamen_basal_ganglia1	protein_coding	chr3	0.241217	1.05e-11	1.51	0.00066	3:181511166-3:183769683
ENSG00000206344	HCG27	Whole_Blood1	lncRNA	chr6	0.276913	5.45e-49	-1.71	0.00066	6:31571337-6:32682664
ENSG00000237541	HLA-DQA2	Pituitary1	protein_coding	chr6	0.629947	1.22e-52	-1.26	0.000659	6:31571337-6:32682664
ENSG00000145214	DGKQ	Brain_Frontal_Cortex_BA91	protein_coding	chr4	0.264711	3.26e-13	5.72	0.000658	4:695146-4:1478711
ENSG00000249592	AC139887.2	Brain_Amygdala1	lncRNA	chr4	0.039551	0.0238578	-0.189	0.000657	4:695146-4:1478711
ENSG00000163545	NUAK2	Colon_Sigmoid1	protein_coding	chr1	0.0373901	0.000525523	1.64	0.000657	1:204681068-1:205922403
ENSG00000103472	RRN3P2	Liver1	lncRNA	chr16	0.080559	3.26e-05	1.49	0.000656	16:29036613-16:31382470
ENSG00000204256	BRD2	Brain_Anterior_cingulate_cortex_BA241	protein_coding	chr6	0.230896	7.3e-10	2.4	0.000655	6:31571337-6:32682664
ENSG00000160803	UBQLN4	Brain_Cerebellar_Hemisphere1	protein_coding	chr1	0.0659062	0.000604842	2.23	0.000655	1:154770403-1:156336133
ENSG00000259807	AC009093.1	Brain_Hippocampus1	lncRNA	chr16	0.0297944	0.0266208	1.38	0.000655	16:29036613-16:31382470
ENSG00000233002	AC005324.1	Brain_Hippocampus1	lncRNA	chr17	0.285174	1.51e-13	-1.38	0.000655	17:15020965-17:16411522
ENSG00000250091	DNAH10OS	Brain_Nucleus_accumbens_basal_ganglia1	lncRNA	chr12	0.110759	1.3e-06	1.66	0.000655	12:122009763-12:124976982
ENSG00000274292	AC084018.2	Small_Intestine_Terminal_Ileum1	lncRNA	chr12	0.194257	1.15e-09	-1.69	0.000655	12:122009763-12:124976982
ENSG00000186868	MAPT	Brain_Caudate_basal_ganglia1	protein_coding	chr17	0.023127	0.034276	1.96	0.000654	17:43056905-17:45876022
ENSG00000139697	SBNO1	Brain_Substantia_nigra1	protein_coding	chr12	0.048631	0.018388	1.77	0.000654	12:122009763-12:124976982
ENSG00000261000	AC244034.2	Whole_Blood1	lncRNA	chr1	0.348265	4.14e-64	1.56	0.000654	1:204681068-1:205922403
ENSG00000167397	VKORC1	Brain_Frontal_Cortex_BA91	protein_coding	chr16	0.05149	0.00252966	-0.257	0.000653	16:29036613-16:31382470
ENSG00000163354	DCST2	Brain_Anterior_cingulate_cortex_BA241	protein_coding	chr1	0.193215	2.55e-08	-1.89	0.000652	1:154770403-1:156336133
ENSG00000149929	HIRIP3	Liver1	protein_coding	chr16	0.0352632	0.00660445	1.79	0.000652	16:29036613-16:31382470
ENSG00000132676	DAP3	Brain_Cerebellar_Hemisphere1	protein_coding	chr1	0.0580466	0.0013191	0.0702	0.000651	1:154770403-1:156336133
ENSG00000204241	LINC02731	Spleen1	lncRNA	chr11	0.0730952	3.66e-05	0.967	0.000651	11:133000260-11:134205993
ENSG00000274292	AC084018.2	Brain_Caudate_basal_ganglia1	lncRNA	chr12	0.129138	2.66e-07	-1.69	0.00065	12:122009763-12:124976982
ENSG00000138750	NUP54	Spleen1	protein_coding	chr4	0.275656	1.75e-17	0.662	0.00065	4:77130707-4:79093979
ENSG00000274191	AC026333.4	Stomach1	lncRNA	chr12	0.0172384	0.0180582	1.61	0.00065	12:122009763-12:124976982
ENSG00000051825	MPHOSPH9	Brain_Hippocampus1	protein_coding	chr12	0.080497	0.000221691	-1.71	0.000649	12:122009763-12:124976982
ENSG00000185619	PCGF3	Pituitary1	protein_coding	chr4	0.295186	1.33e-19	-1.91	0.000648	4:695146-4:1478711
ENSG00000111328	CDK2AP1	Colon_Transverse1	protein_coding	chr12	0.320248	1.53e-32	1.61	0.000647	12:122009763-12:124976982
ENSG00000182667	NTM	Small_Intestine_Terminal_Ileum1	protein_coding	chr11	0.0431799	0.00593446	-1.39	0.000647	11:133000260-11:134205993
ENSG00000274292	AC084018.2	Brain_Putamen_basal_ganglia1	lncRNA	chr12	0.0841641	0.000124276	-1.69	0.000645	12:122009763-12:124976982
ENSG00000274292	AC084018.2	Pituitary1	lncRNA	chr12	0.322769	1.17e-21	-1.67	0.000645	12:122009763-12:124976982
ENSG00000278112	AC145423.3	Pituitary1	lncRNA	chr12	0.0785242	1.19e-05	-1.62	0.000645	12:122009763-12:124976982
ENSG00000158023	WDR66	Brain_Cerebellar_Hemisphere1	protein_coding	chr12	0.171952	1.16e-08	-1.43	0.000644	12:122009763-12:124976982
ENSG00000233002	AC005324.1	Brain_Putamen_basal_ganglia1	lncRNA	chr17	0.332033	2.01e-16	-1.41	0.000644	17:15020965-17:16411522
ENSG00000231890	DARS-AS1	Spleen1	lncRNA	chr2	0.230632	1.69e-14	-1.61	0.000644	2:135159453-2:137042794
ENSG00000179195	ZNF664	Whole_Blood1	protein_coding	chr12	0.0370147	5.23e-07	-1.68	0.000644	12:122009763-12:124976982
ENSG00000235663	SAPCD1-AS1	Brain_Anterior_cingulate_cortex_BA241	lncRNA	chr6	0.0346751	0.0239318	-1.57	0.000643	6:31571337-6:32682664
ENSG00000164649	CDCA7L	Brain_Cerebellar_Hemisphere1	protein_coding	chr7	0.11869	3.03e-06	-1.74	0.000643	7:22508611-7:23469560
ENSG00000181350	LRRC75A	Colon_Sigmoid1	protein_coding	chr17	0.166391	3.52e-14	1.98	0.000643	17:15020965-17:16411522
ENSG00000160803	UBQLN4	Brain_Cerebellum1	protein_coding	chr1	0.0410152	0.00327361	2.21	0.000641	1:154770403-1:156336133
ENSG00000111325	OGFOD2	Brain_Spinal_cord_cervical_c-11	protein_coding	chr12	0.0670634	0.0034111	-1.69	0.000641	12:122009763-12:124976982
ENSG00000174529	TMEM81	Pituitary1	protein_coding	chr1	0.0389138	0.00228198	1.68	0.00064	1:204681068-1:205922403
ENSG00000160785	SLC25A44	Pancreas1	protein_coding	chr1	0.151666	1.74e-12	1.69	0.000639	1:154770403-1:156336133
ENSG00000174529	TMEM81	Brain_Nucleus_accumbens_basal_ganglia1	protein_coding	chr1	0.19896	2.88e-11	1.85	0.000638	1:204681068-1:205922403
ENSG00000228789	HCG22	Brain_Cerebellar_Hemisphere1	lncRNA	chr6	0.0616865	0.000919267	1.69	0.000637	6:31571337-6:32682664
ENSG00000267278	MAP3K14-AS1	Brain_Spinal_cord_cervical_c-11	lncRNA	chr17	0.0398222	0.0250742	0.0681	0.000637	17:43056905-17:45876022
ENSG00000168297	PXK	Small_Intestine_Terminal_Ileum1	protein_coding	chr3	0.138339	4.34e-07	-1.71	0.000637	3:58157850-3:60272829
ENSG00000232759	AC002480.1	Brain_Caudate_basal_ganglia1	lncRNA	chr7	0.0378677	0.00654916	-1.81	0.000636	7:22508611-7:23469560
ENSG00000180834	MAP6D1	Brain_Nucleus_accumbens_basal_ganglia1	protein_coding	chr3	0.0942321	8.85e-06	1.81	0.000636	3:181511166-3:183769683
ENSG00000155970	MICU3	Pancreas1	protein_coding	chr8	0.0184199	0.0177161	-1.7	0.000636	8:15991660-8:17387624
ENSG00000272360	AC116036.2	Brain_Amygdala1	lncRNA	chr3	0.154793	3.98e-06	-1.7	0.000635	3:58157850-3:60272829
ENSG00000204301	NOTCH4	Brain_Cerebellum1	protein_coding	chr6	0.268466	9.37e-16	-1.55	0.000634	6:31571337-6:32682664
ENSG00000235560	AC002310.1	Brain_Spinal_cord_cervical_c-11	lncRNA	chr16	0.0714343	0.00248256	2.3	0.000634	16:29036613-16:31382470
ENSG00000178950	GAK	Brain_Nucleus_accumbens_basal_ganglia1	protein_coding	chr4	0.0294385	0.0146239	4.76	0.000633	4:695146-4:1478711
ENSG00000244731	C4A	Brain_Cerebellum1	protein_coding	chr6	0.469987	2.34e-30	-1.57	0.000632	6:31571337-6:32682664
ENSG00000204310	AGPAT1	Brain_Putamen_basal_ganglia1	protein_coding	chr6	0.0416114	0.00762637	1.65	0.000632	6:31571337-6:32682664
ENSG00000163545	NUAK2	Pancreas1	protein_coding	chr1	0.0343807	0.0011412	1.39	0.000632	1:204681068-1:205922403
ENSG00000233799	AC139887.1	Pancreas1	lncRNA	chr4	0.0566449	2.67e-05	-1.07	0.000632	4:695146-4:1478711
ENSG00000274292	AC084018.2	Brain_Cortex1	lncRNA	chr12	0.233505	2.16e-13	-1.7	0.000629	12:122009763-12:124976982
ENSG00000204410	MSH5	Brain_Spinal_cord_cervical_c-11	protein_coding	chr6	0.0792552	0.00140588	1.02	0.000629	6:31571337-6:32682664
ENSG00000204438	GPANK1	Brain_Spinal_cord_cervical_c-11	protein_coding	chr6	0.0895386	0.000664779	-1.08	0.000629	6:31571337-6:32682664
ENSG00000170382	LRRN2	Spleen1	protein_coding	chr1	0.0271913	0.0128545	1.66	0.000629	1:204681068-1:205922403
ENSG00000163344	PMVK	Brain_Hippocampus1	protein_coding	chr1	0.039649	0.0103463	1.55	0.000628	1:154770403-1:156336133
ENSG00000204308	RNF5	Pancreas1	protein_coding	chr6	0.237069	1.46e-19	-1.62	0.000627	6:31571337-6:32682664
ENSG00000108474	PIGL	Pituitary1	protein_coding	chr17	0.035818	0.00344858	0.756	0.000626	17:15020965-17:16411522
ENSG00000143603	KCNN3	Brain_Hypothalamus1	protein_coding	chr1	0.139106	5.47e-07	-1.63	0.000625	1:154770403-1:156336133
ENSG00000185619	PCGF3	Spleen1	protein_coding	chr4	0.608089	1.16e-47	-1.94	0.000625	4:695146-4:1478711
ENSG00000204392	LSM2	Colon_Sigmoid1	protein_coding	chr6	0.0351297	0.000782269	-0.989	0.000623	6:31571337-6:32682664
ENSG00000196683	TOMM7	Pituitary1	protein_coding	chr7	0.328659	4.17e-22	1.95	0.000623	7:22508611-7:23469560
ENSG00000150991	UBC	Whole_Blood1	protein_coding	chr12	0.0184804	0.000417752	1.66	0.000623	12:122009763-12:124976982
ENSG00000204308	RNF5	Brain_Amygdala1	protein_coding	chr6	0.0737861	0.00184613	-1.6	0.00062	6:31571337-6:32682664
ENSG00000251417	AC145285.2	Brain_Cerebellum1	lncRNA	chr16	0.15361	4.4e-09	-1.46	0.00062	16:29036613-16:31382470
ENSG00000169231	THBS3	Brain_Cerebellum1	protein_coding	chr1	0.256857	4.88e-15	-1.45	0.00062	1:154770403-1:156336133
ENSG00000163374	YY1AP1	Brain_Cortex1	protein_coding	chr1	0.0241295	0.0261484	-0.202	0.00062	1:154770403-1:156336133
ENSG00000198933	TBKBP1	Colon_Transverse1	protein_coding	chr17	0.197938	2.74e-19	1.04	0.00062	17:43056905-17:45876022
ENSG00000143537	ADAM15	Brain_Anterior_cingulate_cortex_BA241	protein_coding	chr1	0.123404	1.28e-05	-1.37	0.000619	1:154770403-1:156336133
ENSG00000168297	PXK	Brain_Putamen_basal_ganglia1	protein_coding	chr3	0.139314	5.36e-07	-1.67	0.000619	3:58157850-3:60272829
ENSG00000233627	C4A-AS1	Liver1	lncRNA	chr6	0.0493366	0.00126189	1.67	0.000619	6:31571337-6:32682664
ENSG00000143603	KCNN3	Brain_Cerebellar_Hemisphere1	protein_coding	chr1	0.085438	8.67e-05	-1.66	0.000618	1:154770403-1:156336133
ENSG00000158715	SLC45A3	Colon_Sigmoid1	protein_coding	chr1	0.0127198	0.0444643	1.33	0.000618	1:204681068-1:205922403
ENSG00000166582	CENPV	Brain_Hippocampus1	protein_coding	chr17	0.452403	4.46e-23	-1.62	0.000617	17:15020965-17:16411522
ENSG00000138758	SEPTIN11	Brain_Putamen_basal_ganglia1	protein_coding	chr4	0.0815524	0.000160089	1.09	0.000617	4:77130707-4:79093979
ENSG00000168297	PXK	Brain_Cortex1	protein_coding	chr3	0.185995	1.08e-10	-1.68	0.000616	3:58157850-3:60272829
ENSG00000240053	LY6G5B	Brain_Putamen_basal_ganglia1	protein_coding	chr6	0.294868	2.01e-14	1.67	0.000616	6:31571337-6:32682664
ENSG00000282386	AL358472.4	Small_Intestine_Terminal_Ileum1	lncRNA	chr1	0.0248382	0.0378089	1.67	0.000616	1:154770403-1:156336133
ENSG00000169231	THBS3	Brain_Putamen_basal_ganglia1	protein_coding	chr1	0.112755	7.59e-06	-1.57	0.000615	1:154770403-1:156336133
ENSG00000278133	AC135050.6	Brain_Anterior_cingulate_cortex_BA241	lncRNA	chr16	0.0412323	0.0136374	0.813	0.000614	16:29036613-16:31382470
ENSG00000160753	RUSC1	Brain_Cerebellar_Hemisphere1	protein_coding	chr1	0.0373421	0.0104006	0.285	0.000614	1:154770403-1:156336133
ENSG00000174529	TMEM81	Brain_Spinal_cord_cervical_c-11	protein_coding	chr1	0.0343184	0.0378256	1.81	0.000614	1:204681068-1:205922403
ENSG00000103549	RNF40	Pancreas1	protein_coding	chr16	0.044201	0.000217281	-2.93	0.000614	16:29036613-16:31382470
ENSG00000181350	LRRC75A	Whole_Blood1	protein_coding	chr17	0.0655513	1.73e-11	1.9	0.000614	17:15020965-17:16411522
ENSG00000260517	AC009093.2	Brain_Spinal_cord_cervical_c-11	lncRNA	chr16	0.101408	0.000279059	1.26	0.000613	16:29036613-16:31382470
ENSG00000231064	AC234582.1	Small_Intestine_Terminal_Ileum1	lncRNA	chr1	0.0380051	0.00994321	-1.67	0.000613	1:154770403-1:156336133
ENSG00000278112	AC145423.3	Colon_Transverse1	lncRNA	chr12	0.0618225	1.37e-06	-1.62	0.000612	12:122009763-12:124976982
ENSG00000232759	AC002480.1	Spleen1	lncRNA	chr7	0.0267414	0.0136318	1.28	0.000612	7:22508611-7:23469560
ENSG00000111325	OGFOD2	Brain_Anterior_cingulate_cortex_BA241	protein_coding	chr12	0.0865041	0.000299382	-1.69	0.000611	12:122009763-12:124976982
ENSG00000165672	PRDX3	Brain_Cerebellum1	protein_coding	chr10	0.023161	0.0278223	1.67	0.00061	10:120591693-10:122407323
ENSG00000132698	RAB25	Brain_Hypothalamus1	protein_coding	chr1	0.06964	0.000506646	1.58	0.00061	1:154770403-1:156336133
ENSG00000237765	FAM200B	Brain_Nucleus_accumbens_basal_ganglia1	protein_coding	chr4	0.249445	3.84e-14	4.89	0.00061	4:15147446-4:15926136
ENSG00000176681	LRRC37A	Colon_Transverse1	protein_coding	chr17	0.471087	1.45e-52	-7.27	0.00061	17:43056905-17:45876022
ENSG00000149922	TBX6	Whole_Blood1	protein_coding	chr16	0.222113	2.4e-38	-1.01	0.00061	16:29036613-16:31382470
ENSG00000185499	MUC1	Brain_Anterior_cingulate_cortex_BA241	protein_coding	chr1	0.0336369	0.0261778	2.23	0.000607	1:154770403-1:156336133
ENSG00000227165	WDR11-AS1	Brain_Cerebellum1	lncRNA	chr10	0.379675	3.07e-23	1.67	0.000607	10:120591693-10:122407323
ENSG00000118804	STBD1	Brain_Frontal_Cortex_BA91	protein_coding	chr4	0.186779	2.34e-09	2.03	0.000607	4:77130707-4:79093979
ENSG00000230658	KLHL7-DT	Colon_Sigmoid1	lncRNA	chr7	0.593854	8.62e-64	-2.3	0.000606	7:22508611-7:23469560
ENSG00000250091	DNAH10OS	Brain_Frontal_Cortex_BA91	lncRNA	chr12	0.145097	1.99e-07	1.62	0.000605	12:122009763-12:124976982
ENSG00000275413	AC002553.2	Brain_Cortex1	lncRNA	chr17	0.0304246	0.0123724	-0.389	0.000604	17:15020965-17:16411522
ENSG00000103502	CDIPT	Brain_Caudate_basal_ganglia1	protein_coding	chr16	0.0377102	0.00666435	1.65	0.000602	16:29036613-16:31382470
ENSG00000143622	RIT1	Brain_Cerebellar_Hemisphere1	protein_coding	chr1	0.178337	5.85e-09	2.27	0.000602	1:154770403-1:156336133
ENSG00000132680	KHDC4	Colon_Transverse1	protein_coding	chr1	0.0127994	0.0300158	1.66	0.000602	1:154770403-1:156336133
ENSG00000143537	ADAM15	Spleen1	protein_coding	chr1	0.107826	4.17e-07	-1.15	0.000602	1:154770403-1:156336133
ENSG00000185829	ARL17A	Whole_Blood1	protein_coding	chr17	0.406778	8.68e-78	3.73	0.000602	17:43056905-17:45876022
ENSG00000099385	BCL7C	Brain_Cerebellum1	protein_coding	chr16	0.0260949	0.0194545	-3.75	0.000601	16:29036613-16:31382470
ENSG00000270361	AL451085.1	Brain_Cerebellar_Hemisphere1	lncRNA	chr1	0.0561486	0.00159254	-1.55	0.0006	1:154770403-1:156336133
ENSG00000281406	BLACAT1	Brain_Hippocampus1	protein_coding	chr1	0.111833	1.13e-05	1.13	0.000599	1:204681068-1:205922403
ENSG00000172992	DCAKD	Colon_Transverse1	protein_coding	chr17	0.385754	1.23e-40	-2.18	0.000599	17:43056905-17:45876022
ENSG00000204516	MICB	Colon_Transverse1	protein_coding	chr6	0.405475	3.07e-43	-1.52	0.000597	6:31571337-6:32682664
ENSG00000214401	KANSL1-AS1	Colon_Sigmoid1	lncRNA	chr17	0.630123	3.19e-70	-4.68	0.000596	17:43056905-17:45876022
ENSG00000260487	AC116348.1	Colon_Transverse1	lncRNA	chr16	0.0126932	0.0307107	1.94	0.000596	16:29036613-16:31382470
ENSG00000196498	NCOR2	Brain_Anterior_cingulate_cortex_BA241	protein_coding	chr12	0.0799881	0.00051872	-1.62	0.000595	12:122009763-12:124976982
ENSG00000163346	PBXIP1	Brain_Caudate_basal_ganglia1	protein_coding	chr1	0.0232163	0.033927	-1.57	0.000595	1:154770403-1:156336133
ENSG00000162877	PM20D1	Brain_Hypothalamus1	protein_coding	chr1	0.258713	1.43e-12	-0.931	0.000595	1:204681068-1:205922403
ENSG00000260953	AC009093.4	Brain_Putamen_basal_ganglia1	lncRNA	chr16	0.228129	4.52e-11	1.32	0.000595	16:29036613-16:31382470
ENSG00000181350	LRRC75A	Colon_Transverse1	protein_coding	chr17	0.0870108	8.01e-09	1.29	0.000595	17:15020965-17:16411522
ENSG00000149328	GLB1L2	Pituitary1	protein_coding	chr11	0.102596	4.7e-07	1.73	0.000595	11:133000260-11:134205993
ENSG00000181350	LRRC75A	Small_Intestine_Terminal_Ileum1	protein_coding	chr17	0.0842145	0.000102626	0.455	0.000595	17:15020965-17:16411522
ENSG00000272360	AC116036.2	Brain_Anterior_cingulate_cortex_BA241	lncRNA	chr3	0.0343131	0.0246915	-1.65	0.000594	3:58157850-3:60272829
ENSG00000274427	AC145423.2	Brain_Nucleus_accumbens_basal_ganglia1	lncRNA	chr12	0.0199426	0.0449962	-1.5	0.000594	12:122009763-12:124976982
ENSG00000149926	TLCD3B	Colon_Transverse1	protein_coding	chr16	0.0271066	0.00152824	1.66	0.000594	16:29036613-16:31382470
ENSG00000145217	SLC26A1	Brain_Hippocampus1	protein_coding	chr4	0.161194	9.06e-08	2.92	0.000592	4:695146-4:1478711
ENSG00000130921	C12orf65	Pituitary1	protein_coding	chr12	0.050583	0.000485029	1.67	0.000592	12:122009763-12:124976982
ENSG00000272360	AC116036.2	Small_Intestine_Terminal_Ileum1	lncRNA	chr3	0.126556	1.45e-06	-1.56	0.000592	3:58157850-3:60272829
ENSG00000187607	ZNF286A	Brain_Cerebellum1	protein_coding	chr17	0.167717	7.4e-10	1.38	0.000591	17:15020965-17:16411522
ENSG00000204301	NOTCH4	Pancreas1	protein_coding	chr6	0.158388	5.11e-13	-1.63	0.000591	6:31571337-6:32682664
ENSG00000125459	MSTO1	Brain_Nucleus_accumbens_basal_ganglia1	protein_coding	chr1	0.0215155	0.0372439	0.325	0.00059	1:154770403-1:156336133
ENSG00000169231	THBS3	Colon_Sigmoid1	protein_coding	chr1	0.128616	4.38e-11	-1.65	0.00059	1:154770403-1:156336133
ENSG00000151503	NCAPD3	Pancreas1	protein_coding	chr11	0.0667477	4.85e-06	-1.62	0.00059	11:133000260-11:134205993
ENSG00000164649	CDCA7L	Spleen1	protein_coding	chr7	0.0528937	0.000477801	-0.913	0.00059	7:22508611-7:23469560
ENSG00000272360	AC116036.2	Brain_Hypothalamus1	lncRNA	chr3	0.0668468	0.000663469	-1.47	0.000589	3:58157850-3:60272829
ENSG00000273133	AC116651.1	Brain_Substantia_nigra1	lncRNA	chr4	0.162887	8.48e-06	-1.7	0.000589	4:15147446-4:15926136
ENSG00000196683	TOMM7	Brain_Cerebellum1	protein_coding	chr7	0.458265	2.28e-29	2.16	0.000588	7:22508611-7:23469560
ENSG00000235663	SAPCD1-AS1	Brain_Hypothalamus1	lncRNA	chr6	0.0244728	0.0416288	-1.61	0.000588	6:31571337-6:32682664
ENSG00000169231	THBS3	Liver1	protein_coding	chr1	0.125119	1.6e-07	-1.55	0.000588	1:154770403-1:156336133
[truncated: 4,268 more rows]
