# Supplementary material for: Joint analysis of proteome, transcriptome, and multi-trait analysis to identify novel Parkinson’s disease risk genes
Source: Aging (Albany NY). 2024 Jan 17;16(2):1555–80. doi: 10.18632/aging.205444 (PMC10866412; doi:10.18632/aging.205444)
Supplement: Supplementary Table 19 [file aging-16-205444-s018.xlsx]

## Sheet: Sheet1
Supplementary Table 19. Fine-mapping results of PD MTAG based on TWAS-identified genes for PD risk and the 22 genes have not been previously identified in TWAS.
Region	Gene name	Type	PDMTAG TWAS					FOCUS
			Model	R2	Number	effect_size	P-value	PIP	TWAS-Z	Region
					of SNPs
					in model
1q21.3	EFNA3	protein	Stomach	0.0133445	7	0.375585	8.27712e-08	0.938	4.85	1:154770403-1:156336133
1q22	FAM189B	protein	Brain_Cerebellum	0.0204993	4	0.158175	1.69116e-08	0.948	5.24	1:154770403-1:156336133
	a	protein	Spleen	0.108994	20	0.0473923	1.37126e-10	1	6.95	1:154770403-1:156336133
2q24.3	STK39	protein	Brain_Caudate_basal_ganglia	0.0656685	5	-0.0829991	1.5137e-07	0.976	-5.05	2:167356254-2:169968112
		protein	Brain_Nucleus_accumbens_basal_ganglia	0.0851189	10	-0.0660209	3.27144e-07	0.911	-4.77	2:167356254-2:169968112
		protein	Brain_Putamen_basal_ganglia	0.0833798	9	-0.0557782	2.94741e-07	0.958	-4.93	2:167356254-2:169968112
3q27.1	LAMP3	protein	Brain_Putamen_basal_ganglia	0.0340929	8	-0.0861578	8.93682e-09	0.914	-5	3:181511166-3:183769683
4p15.32	FAM200B	protein	Brain_Cerebellar_Hemisphere	0.38673	22	0.0214453	2.65489e-08	0.998	5.64	4:15147446-4:15926136
4p16.3	DGKQ	protein	Brain_Cerebellar_Hemisphere	0.130992	10	-0.0658061	6.41871e-24	1	-10.4	4:695146-4:1478711
		protein	Brain_Cerebellum	0.219367	15	-0.0444746	5.59815e-23	1	-10	4:695146-4:1478711
		protein	Brain_Spinal_cord_cervical_c-1	0.170999	5	-0.661834	9.40265e-09	1	-5.48	4:695146-4:1478711
		protein	Colon_Sigmoid	0.281221	19	-0.137901	2.37387e-19	1	-8.59	4:695146-4:1478711
		protein	Colon_Transverse	0.159067	29	-0.132237	2.71199e-17	1	-7.92	4:695146-4:1478711
		protein	Liver	0.169699	18	-0.137629	9.34664e-19	1	-8.39	4:695146-4:1478711
		protein	Pancreas	0.354009	20	-0.106346	2.55351e-15	1	-7.78	4:695146-4:1478711
		protein	Pituitary	0.18171	21	-0.0964604	1.06784e-11	1	-6.8	4:695146-4:1478711
		protein	Small_Intestine_Terminal_Ileum	0.186109	9	-0.488772	1.11856e-21	1	-8.97	4:695146-4:1478711
		protein	Spleen	0.607755	30	-0.0929855	6.88461e-21	1	-9.22	4:695146-4:1478711
		protein	Whole_Blood	0.627778	38	-0.0504289	1.44117e-14	1	-8.03	4:695146-4:1478711
4q21.1	CDKL2	protein	Stomach	0.0120226	6	0.158444	3.58602e-09	0.957	6.05	4:77130707-4:79093979
4q22.1	NDUFAF2	protein	Brain_Cortex	0.0693051	4	0.0694183	4.41223e-09	0.998	5.65	5:58524622-5:60935451
		protein	Brain_Hippocampus	0.0662406	3	0.0672604	5.2749e-09	0.999	5.6	5:58524622-5:60935451
		protein	Brain_Nucleus_accumbens_basal_ganglia	0.0283271	2	0.0677355	2.75187e-09	0.999	5.75	5:58524622-5:60935451
		protein	Brain_Putamen_basal_ganglia	0.0622328	3	0.0751462	1.92454e-09	1	5.83	5:58524622-5:60935451
		protein	Brain_Substantia_nigra	0.0420411	2	0.166476	8.9353e-09	0.997	5.48	5:58524622-5:60935451
		protein	Pancreas	0.0298521	21	0.082698	1.90592e-07	0.994	5.67	5:58524622-5:60935451
6p21.32	HLA-DQB1	protein	Brain_Cortex	0.519005	24	-0.0691986	1.49376e-06	0.909	-4.77	6:31571337-6:32682664
		protein	Stomach	0.646473	13	-0.681454	1.49376e-06	0.911	-4.77	6:31571337-6:32682664
11q25	IGSF9B	protein	Brain_Cerebellar_Hemisphere	0.0271893	3	-0.0650476	2.96432e-07	0.945	-4.88	11:133000260-11:134205993
		protein	Brain_Hippocampus	0.0414598	1	-0.166799	2.38067e-07	0.954	-4.92	11:133000260-11:134205993
		protein	Small_Intestine_Terminal_Ileum	0.0426895	3	-0.0621632	4.17775e-07	0.927	-4.82	11:133000260-11:134205993
12q24.31	CCDC62	protein	Brain_Cerebellar_Hemisphere	0.0988312	5	0.0858489	1.11408e-09	0.999	5.64	12:122009763-12:124976982
		protein	Brain_Cerebellum	0.111884	5	0.112823	4.98045e-09	0.996	5.41	12:122009763-12:124976982
16p11.2	FBXL19	protein	Brain_Substantia_nigra	0.0401061	5	-0.0686445	1.16856e-10	0.966	-6.18	16:29036613-16:31382470
17p12	ADORA2B	protein	Brain_Substantia_nigra	0.129597	7	0.0404234	8.41585e-08	0.969	5.04	17:15020965-17:16411522
		protein	Colon_Transverse	0.068176	7	0.0317052	1.31249e-07	0.964	5	17:15020965-17:16411522
17q21.31	ARHGAP27	protein	Brain_Caudate_basal_ganglia	0.122012	11	-0.0724383	1.74837e-20	0.985	-9.53	17:43056905-17:45876022
17q21.31-q21.32	WNT3	protein	Colon_Transverse	0.177168	13	-0.0621485	1.47704e-21	0.985	-8.8	17:43056905-17:45876022
3q27.1	MCCC1-AS1	lncRNA	Brain_Cortex	0.0511726	5	-0.0677479	6.12988e-07	0.915	-4.12	3:181511166-3:183769683
4q22.1	SNCA-AS1	lncRNA	Brain_Cerebellar_Hemisphere	0.220162	16	-0.0131728	3.12664e-06	0.944	-5.32	4:90231746-4:91560677
7p15.3	KLHL7-DT	lncRNA	Brain_Cerebellum	0.449882	10	-0.0121915	2.74897e-07	0.919	-4.79	7:22508611-7:23469560
17q21.31	MAPT-IT1	lncRNA	Brain_Substantia_nigra	0.0860082	4	-0.175615	1.92795e-22	0.963	-9.63	17:43056905-17:45876022
	KANSL1-AS1	lncRNA	Brain_Spinal_cord_cervical_c-1	0.546919	24	-0.0715688	4.99627e-23	0.981	-9.68	17:43056905-17:45876022
		lncRNA	Liver	0.667718	23	-0.0557807	6.66979e-21	0.992	-9.24	17:43056905-17:45876022
	MAPT-AS1	lncRNA	Brain_Amygdala	0.110245	11	0.0605847	4.51242e-08	0.944	9.38	17:43056905-17:45876022
