# Supplementary material for: Joint analysis of proteome, transcriptome, and multi-trait analysis to identify novel Parkinson’s disease risk genes
Source: Aging (Albany NY). 2024 Jan 17;16(2):1555–80. doi: 10.18632/aging.205444 (PMC10866412; doi:10.18632/aging.205444)
Supplement: Supplementary Table 20 [file aging-16-205444-s019.xlsx]

## Sheet: Additional file16 (Table S15)
Supplementary Table 20. Pathway analysis of central nervous systems S-PrediXcan results(PD GWAS).
ONTOLOGY	ID	Description	GeneRatio	BgRatio	p-value	p.adjust	q-value	geneID	Count
BP	GO:0010977	negative regulation of neuron projection development	7/51	155/18670	2.02e-07	0.000314888	0.000233534	CD38/EFNA1/GAK/RIT2/WNT3/RAB29/STX1B	7
BP	GO:0031345	negative regulation of cell projection organization	7/51	188/18670	7.47e-07	0.000443675	0.000329048	CD38/EFNA1/GAK/RIT2/WNT3/RAB29/STX1B	7
BP	GO:0099504	synaptic vesicle cycle	7/51	194/18670	9.23e-07	0.000443675	0.000329048	ADORA2B/DGKQ/GAK/SH3GL2/SNCA/STX4/STX1B	7
BP	GO:0036465	synaptic vesicle recycling	5/51	69/18670	1.23e-06	0.000443675	0.000329048	DGKQ/GAK/SH3GL2/SNCA/STX1B	5
BP	GO:0099003	vesicle-mediated transport in synapse	7/51	207/18670	1.42e-06	0.000443675	0.000329048	ADORA2B/DGKQ/GAK/SH3GL2/SNCA/STX4/STX1B	7
BP	GO:0045665	negative regulation of neuron differentiation	7/51	225/18670	2.48e-06	0.000643841	0.0004775	CD38/EFNA1/GAK/RIT2/WNT3/RAB29/STX1B	7
BP	GO:0010975	regulation of neuron projection development	9/51	499/18670	7.26e-06	0.00161429	0.00119723	SCARB2/CD38/EFNA1/GAK/MAPT/RIT2/WNT3/RAB29/STX1B	9
BP	GO:0001921	positive regulation of receptor recycling	3/51	15/18670	8.54e-06	0.0016616	0.00123232	NSF/SNCA/RAB29	3
BP	GO:0050768	negative regulation of neurogenesis	7/51	295/18670	1.46e-05	0.00231182	0.00171455	CD38/EFNA1/GAK/RIT2/WNT3/RAB29/STX1B	7
BP	GO:0048488	synaptic vesicle endocytosis	4/51	56/18670	1.63e-05	0.00231182	0.00171455	DGKQ/GAK/SH3GL2/SNCA	4
BP	GO:0140238	presynaptic endocytosis	4/51	56/18670	1.63e-05	0.00231182	0.00171455	DGKQ/GAK/SH3GL2/SNCA	4
BP	GO:0050804	modulation of chemical synaptic transmission	8/51	436/18670	2.19e-05	0.00248023	0.00183944	ADORA2B/CD38/CRHR1/MAPT/SNCA/STX4/IGSF9B/STX1B	8
BP	GO:0099177	regulation of trans-synaptic signaling	8/51	437/18670	2.23e-05	0.00248023	0.00183944	ADORA2B/CD38/CRHR1/MAPT/SNCA/STX4/IGSF9B/STX1B	8
BP	GO:0051961	negative regulation of nervous system development	7/51	315/18670	2.23e-05	0.00248023	0.00183944	CD38/EFNA1/GAK/RIT2/WNT3/RAB29/STX1B	7
BP	GO:0017157	regulation of exocytosis	6/51	217/18670	2.68e-05	0.00278002	0.00206178	ADORA2B/CRHR1/NSF/SNCA/STX4/STX1B	6
BP	GO:0001919	regulation of receptor recycling	3/51	24/18670	3.73e-05	0.00320601	0.00237771	NSF/SNCA/RAB29	3
BP	GO:0043302	positive regulation of leukocyte degranulation	3/51	24/18670	3.73e-05	0.00320601	0.00237771	ADORA2B/CRHR1/STX4	3
BP	GO:1903421	regulation of synaptic vesicle recycling	3/51	24/18670	3.73e-05	0.00320601	0.00237771	DGKQ/SNCA/STX1B	3
BP	GO:0010721	negative regulation of cell development	7/51	344/18670	3.91e-05	0.00320601	0.00237771	CD38/EFNA1/GAK/RIT2/WNT3/RAB29/STX1B	7
BP	GO:0051953	negative regulation of amine transport	3/51	27/18670	5.36e-05	0.004175	0.00309636	CRHR1/SNCA/STK39	3
BP	GO:0061025	membrane fusion	5/51	154/18670	6.19e-05	0.00458889	0.00340331	NSF/SNCA/STX4/TMEM175/STX1B	5
BP	GO:0002888	positive regulation of myeloid leukocyte mediated immunity	3/51	31/18670	8.18e-05	0.00578791	0.00429256	ADORA2B/CRHR1/STX4	3
BP	GO:0050806	positive regulation of synaptic transmission	5/51	168/18670	9.34e-05	0.00630799	0.00467827	CRHR1/SNCA/STX4/IGSF9B/STX1B	5
BP	GO:0045921	positive regulation of exocytosis	4/51	88/18670	9.72e-05	0.00630799	0.00467827	ADORA2B/CRHR1/SNCA/STX4	4
BP	GO:0030100	regulation of endocytosis	6/51	281/18670	0.000112398	0.00700016	0.00519162	DGKQ/RIT2/SH3GL2/SNCA/HIP1R/STX1B	6
BP	GO:0001881	receptor recycling	3/51	35/18670	0.000118166	0.0070763	0.00524809	NSF/SNCA/RAB29	3
BP	GO:0006906	vesicle fusion	4/51	94/18670	0.000125632	0.00724476	0.00537302	SNCA/STX4/TMEM175/STX1B	4
BP	GO:0048167	regulation of synaptic plasticity	5/51	187/18670	0.000154498	0.00856937	0.0063554	CD38/CRHR1/MAPT/SNCA/STX4	5
BP	GO:0090174	organelle membrane fusion	4/51	100/18670	0.000159609	0.00856937	0.0063554	SNCA/STX4/TMEM175/STX1B	4
BP	GO:0072583	clathrin-dependent endocytosis	3/51	40/18670	0.000176669	0.0091691	0.00680019	GAK/SH3GL2/HIP1R	3
BP	GO:0010952	positive regulation of peptidase activity	5/51	197/18670	0.000196943	0.00989164	0.00733606	EFNA1/MAPT/SNCA/HIP1R/DDRGK1	5
BP	GO:0006898	receptor-mediated endocytosis	6/51	316/18670	0.000212714	0.0103499	0.00767591	SCARB2/GAK/SH3GL2/SNCA/HIP1R/ARHGAP27	6
BP	GO:0023061	signal release	7/51	462/18670	0.000245221	0.0110074	0.00816359	ADORA2B/CD38/CRHR1/SNCA/STX4/NDUFAF2/STX1B	7
BP	GO:0098693	regulation of synaptic vesicle cycle	4/51	112/18670	0.000246787	0.0110074	0.00816359	ADORA2B/DGKQ/SNCA/STX1B	4
BP	GO:0016050	vesicle organization	6/51	325/18670	0.000247438	0.0110074	0.00816359	SCARB2/NSF/SNCA/STX4/TMEM175/STX1B	6
BP	GO:0043300	regulation of leukocyte degranulation	3/51	46/18670	0.000268325	0.0116051	0.0086068	ADORA2B/CRHR1/STX4	3
BP	GO:0016079	synaptic vesicle exocytosis	4/51	119/18670	0.000311124	0.0130924	0.0097099	ADORA2B/SNCA/STX4/STX1B	4
BP	GO:1990416	cellular response to brain-derived neurotrophic factor stimulus	2/51	10/18670	0.000324643	0.0133018	0.00986519	MAPT/SH3GL2	2
BP	GO:0048284	organelle fusion	4/51	124/18670	0.000363895	0.0145278	0.0107744	SNCA/STX4/TMEM175/STX1B	4
BP	GO:1903307	positive regulation of regulated secretory pathway	3/51	53/18670	0.000408548	0.0159027	0.0117941	ADORA2B/CRHR1/STX4	3
BP	GO:0045862	positive regulation of proteolysis	6/51	363/18670	0.000446263	0.0167007	0.0123859	EFNA1/MAPT/SNCA/HIP1R/RNF40/DDRGK1	6
BP	GO:0002886	regulation of myeloid leukocyte mediated immunity	3/51	55/18670	0.000455781	0.0167007	0.0123859	ADORA2B/CRHR1/STX4	3
BP	GO:0042177	negative regulation of protein catabolic process	4/51	132/18670	0.000461226	0.0167007	0.0123859	EFNA1/SNCA/LAMP3/DDRGK1	4
BP	GO:0070493	thrombin-activated receptor signaling pathway	2/51	12/18670	0.000474481	0.0167901	0.0124523	DGKQ/SNCA	2
BP	GO:0032890	regulation of organic acid transport	3/51	59/18670	0.000560456	0.0190801	0.0141506	SNCA/NCOR1/STK39	3
BP	GO:0043543	protein acylation	5/51	248/18670	0.000566886	0.0190801	0.0141506	MAPT/NMT1/SNCA/SRCAP/KAT8	5
BP	GO:0042176	regulation of protein catabolic process	6/51	381/18670	0.000575956	0.0190801	0.0141506	EFNA1/NSF/SNCA/RNF40/LAMP3/DDRGK1	6
BP	GO:0048278	vesicle docking	3/51	64/18670	0.000711424	0.0229248	0.017002	NSF/STX4/STX1B	3
BP	GO:1903532	positive regulation of secretion by cell	6/51	399/18670	0.000733314	0.0229248	0.017002	ADORA2B/CD38/CRHR1/SNCA/STX4/STX1B	6
BP	GO:0033008	positive regulation of mast cell activation involved in immune response	2/51	15/18670	0.000750908	0.0229248	0.017002	ADORA2B/CRHR1	2
BP	GO:0043306	positive regulation of mast cell degranulation	2/51	15/18670	0.000750908	0.0229248	0.017002	ADORA2B/CRHR1	2
BP	GO:0048489	synaptic vesicle transport	4/51	152/18670	0.000783832	0.0230269	0.0170777	ADORA2B/SNCA/STX4/STX1B	4
BP	GO:0097480	establishment of synaptic vesicle localization	4/51	152/18670	0.000783832	0.0230269	0.0170777	ADORA2B/SNCA/STX4/STX1B	4
BP	GO:0017156	calcium ion regulated exocytosis	4/51	154/18670	0.000823033	0.0237308	0.0175998	ADORA2B/SNCA/STX4/STX1B	4
BP	GO:2000369	regulation of clathrin-dependent endocytosis	2/51	16/18670	0.000856682	0.0242519	0.0179862	SH3GL2/HIP1R	2
BP	GO:1903305	regulation of regulated secretory pathway	4/51	160/18670	0.000948941	0.0263839	0.0195674	ADORA2B/CRHR1/STX4/STX1B	4
BP	GO:0050805	negative regulation of synaptic transmission	3/51	72/18670	0.00100285	0.0268313	0.0198992	CD38/MAPT/SNCA	3
BP	GO:1903051	negative regulation of proteolysis involved in cellular protein catabolic process	3/51	72/18670	0.00100285	0.0268313	0.0198992	EFNA1/LAMP3/DDRGK1	3
BP	GO:0097479	synaptic vesicle localization	4/51	163/18670	0.00101673	0.0268313	0.0198992	ADORA2B/SNCA/STX4/STX1B	4
BP	GO:0051047	positive regulation of secretion	6/51	428/18670	0.00105485	0.0273192	0.0202611	ADORA2B/CD38/CRHR1/SNCA/STX4/STX1B	6
BP	GO:0032418	lysosome localization	3/51	74/18670	0.00108585	0.0273192	0.0202611	ADORA2B/CRHR1/PLEKHM1	3
BP	GO:0006475	internal protein amino acid acetylation	4/51	166/18670	0.00108785	0.0273192	0.0202611	MAPT/SNCA/SRCAP/KAT8	4
BP	GO:0051650	establishment of vesicle localization	5/51	290/18670	0.00114411	0.028221	0.0209299	ADORA2B/NSF/SNCA/STX4/STX1B	5
BP	GO:0007269	neurotransmitter secretion	4/51	169/18670	0.00116241	0.028221	0.0209299	ADORA2B/SNCA/STX4/STX1B	4
BP	GO:0099643	signal release from synapse	4/51	170/18670	0.00118804	0.028221	0.0209299	ADORA2B/SNCA/STX4/STX1B	4
BP	GO:0016082	synaptic vesicle priming	2/51	19/18670	0.00121439	0.028221	0.0209299	SNCA/STX1B	2
BP	GO:0035493	SNARE complex assembly	2/51	19/18670	0.00121439	0.028221	0.0209299	SNCA/STX4	2
BP	GO:0033005	positive regulation of mast cell activation	2/51	20/18670	0.00134697	0.029835	0.0221269	ADORA2B/CRHR1	2
BP	GO:0033194	response to hydroperoxide	2/51	20/18670	0.00134697	0.029835	0.0221269	CD38/STX4	2
BP	GO:0048148	behavioral response to cocaine	2/51	20/18670	0.00134697	0.029835	0.0221269	CRHR1/SNCA	2
BP	GO:0140029	exocytic process	3/51	80/18670	0.00136049	0.029835	0.0221269	SNCA/STX4/STX1B	3
BP	GO:0052547	regulation of peptidase activity	6/51	452/18670	0.00139517	0.0300211	0.0222649	EFNA1/MAPT/SNCA/HIP1R/LAMP3/DDRGK1	6
BP	GO:0010950	positive regulation of endopeptidase activity	4/51	178/18670	0.00140754	0.0300211	0.0222649	EFNA1/MAPT/SNCA/HIP1R	4
BP	GO:0051648	vesicle localization	5/51	306/18670	0.00145099	0.0305297	0.0226421	ADORA2B/NSF/SNCA/STX4/STX1B	5
BP	GO:0001956	positive regulation of neurotransmitter secretion	2/51	21/18670	0.00148616	0.0308527	0.0228816	SNCA/STX1B	2
BP	GO:1990778	protein localization to cell periphery	5/51	311/18670	0.0015583	0.0319246	0.0236767	GAK/NSF/STX4/RAB29/STX1B	5
BP	GO:0031629	synaptic vesicle fusion to presynaptic active zone membrane	2/51	22/18670	0.00163192	0.0324224	0.0240458	STX4/STX1B	2
BP	GO:0006919	activation of cysteine-type endopeptidase activity involved in apoptotic process	3/51	86/18670	0.00167527	0.0324224	0.0240458	MAPT/SNCA/HIP1R	3
BP	GO:0060291	long-term synaptic potentiation	3/51	86/18670	0.00167527	0.0324224	0.0240458	CRHR1/SNCA/STX4	3
BP	GO:1903363	negative regulation of cellular protein catabolic process	3/51	86/18670	0.00167527	0.0324224	0.0240458	EFNA1/LAMP3/DDRGK1	3
BP	GO:0019933	cAMP-mediated signaling	4/51	187/18670	0.00168671	0.0324224	0.0240458	ADORA2B/CRHR1/DGKQ/RIT2	4
BP	GO:0099500	vesicle fusion to plasma membrane	2/51	23/18670	0.00178423	0.0338786	0.0251258	STX4/STX1B	2
BP	GO:0032410	negative regulation of transporter activity	3/51	89/18670	0.00184835	0.0341562	0.0253317	CRHR1/SNCA/STK39	3
BP	GO:0043112	receptor metabolic process	4/51	192/18670	0.0018574	0.0341562	0.0253317	NSF/SH3GL2/SNCA/RAB29	4
BP	GO:1903829	positive regulation of cellular protein localization	5/51	324/18670	0.00186466	0.0341562	0.0253317	MAPT/NMT1/STX4/RAB29/DDRGK1	5
BP	GO:0010640	regulation of platelet-derived growth factor receptor signaling pathway	2/51	24/18670	0.00194304	0.0351781	0.0260895	SNCA/HIP1R	2
BP	GO:0044070	regulation of anion transport	3/51	95/18670	0.00222709	0.0394043	0.0292239	SNCA/NCOR1/STK39	3
BP	GO:0051952	regulation of amine transport	3/51	95/18670	0.00222709	0.0394043	0.0292239	CRHR1/SNCA/STK39	3
BP	GO:0006473	protein acetylation	4/51	204/18670	0.00231532	0.040505	0.0300402	MAPT/SNCA/SRCAP/KAT8	4
BP	GO:0006109	regulation of carbohydrate metabolic process	4/51	206/18670	0.00239855	0.0414949	0.0307744	SCARB2/DGKQ/SNCA/NCOR1	4
BP	GO:0015837	amine transport	3/51	102/18670	0.00272588	0.0463576	0.0343808	CRHR1/SNCA/STK39	3
BP	GO:1903050	regulation of proteolysis involved in cellular protein catabolic process	4/51	214/18670	0.00275215	0.0463576	0.0343808	EFNA1/RNF40/LAMP3/DDRGK1	4
BP	GO:0019935	cyclic-nucleotide-mediated signaling	4/51	215/18670	0.00279873	0.0463576	0.0343808	ADORA2B/CRHR1/DGKQ/RIT2	4
BP	GO:0043281	regulation of cysteine-type endopeptidase activity involved in apoptotic process	4/51	215/18670	0.00279873	0.0463576	0.0343808	MAPT/SNCA/HIP1R/LAMP3	4
BP	GO:0006892	post-Golgi vesicle-mediated transport	3/51	104/18670	0.00288001	0.0467101	0.0346422	GAK/NSF/STX4	3
BP	GO:0046928	regulation of neurotransmitter secretion	3/51	104/18670	0.00288001	0.0467101	0.0346422	ADORA2B/SNCA/STX1B	3
BP	GO:0099565	chemical synaptic transmission, postsynaptic	3/51	108/18670	0.00320416	0.0508603	0.0377201	SNCA/IGSF9B/STX1B	3
BP	GO:0043304	regulation of mast cell degranulation	2/51	31/18670	0.00323389	0.0508603	0.0377201	ADORA2B/CRHR1	2
BP	GO:0060292	long-term synaptic depression	2/51	31/18670	0.00323389	0.0508603	0.0377201	CD38/MAPT	2
BP	GO:0033006	regulation of mast cell activation involved in immune response	2/51	32/18670	0.00344348	0.053615	0.0397631	ADORA2B/CRHR1	2
BP	GO:0051955	regulation of amino acid transport	2/51	33/18670	0.00365926	0.0558575	0.0414263	SNCA/STK39	2
BP	GO:2001024	negative regulation of response to drug	2/51	33/18670	0.00365926	0.0558575	0.0414263	SNCA/STK39	2
BP	GO:0031346	positive regulation of cell projection organization	5/51	383/18670	0.00383378	0.0579533	0.0429806	SCARB2/MAPT/RIT2/WNT3/PLEKHM1	5
BP	GO:1900371	regulation of purine nucleotide biosynthetic process	3/51	117/18670	0.00401302	0.0592503	0.0439425	ADORA2B/SNCA/NCOR1	3
BP	GO:0051048	negative regulation of secretion	4/51	238/18670	0.00402495	0.0592503	0.0439425	CRHR1/SNCA/STK39/NDUFAF2	4
BP	GO:2000116	regulation of cysteine-type endopeptidase activity	4/51	239/18670	0.0040853	0.0592503	0.0439425	MAPT/SNCA/HIP1R/LAMP3	4
BP	GO:1901030	positive regulation of mitochondrial outer membrane permeabilization involved in apoptotic signaling pathway	2/51	35/18670	0.00410926	0.0592503	0.0439425	NMT1/HIP1R	2
BP	GO:0030808	regulation of nucleotide biosynthetic process	3/51	118/18670	0.00410985	0.0592503	0.0439425	ADORA2B/SNCA/NCOR1	3
BP	GO:1903362	regulation of cellular protein catabolic process	4/51	247/18670	0.00459037	0.0655707	0.04863	EFNA1/RNF40/LAMP3/DDRGK1	4
BP	GO:0030072	peptide hormone secretion	4/51	250/18670	0.00479016	0.0671436	0.0497965	CD38/CRHR1/STX4/NDUFAF2	4
BP	GO:0007190	activation of adenylate cyclase activity	2/51	38/18670	0.00482985	0.0671436	0.0497965	ADORA2B/CRHR1	2
BP	GO:0051590	positive regulation of neurotransmitter transport	2/51	38/18670	0.00482985	0.0671436	0.0497965	SNCA/STX1B	2
BP	GO:0050808	synapse organization	5/51	408/18670	0.00500596	0.0689759	0.0511555	EFNA1/MAPT/SNCA/RAB29/IGSF9B	5
BP	GO:0044058	regulation of digestive system process	2/51	40/18670	0.00534026	0.0723024	0.0536225	HIP1R/STK39	2
BP	GO:0045124	regulation of bone resorption	2/51	40/18670	0.00534026	0.0723024	0.0536225	CD38/PLEKHM1	2
BP	GO:0043280	positive regulation of cysteine-type endopeptidase activity involved in apoptotic process	3/51	132/18670	0.0056167	0.0753896	0.0559121	MAPT/SNCA/HIP1R	3
BP	GO:0002705	positive regulation of leukocyte mediated immunity	3/51	133/18670	0.00573536	0.0760031	0.0563671	ADORA2B/CRHR1/STX4	3
BP	GO:0031330	negative regulation of cellular catabolic process	4/51	264/18670	0.00580025	0.0760031	0.0563671	EFNA1/SNCA/LAMP3/DDRGK1	4
BP	GO:0007006	mitochondrial membrane organization	3/51	134/18670	0.00585552	0.0760031	0.0563671	NMT1/SNCA/HIP1R	3
BP	GO:0033003	regulation of mast cell activation	2/51	42/18670	0.00587435	0.0760031	0.0563671	ADORA2B/CRHR1	2
BP	GO:0052548	regulation of endopeptidase activity	5/51	425/18670	0.00593622	0.0760031	0.0563671	EFNA1/MAPT/SNCA/HIP1R/LAMP3	5
BP	GO:0046883	regulation of hormone secretion	4/51	266/18670	0.00595528	0.0760031	0.0563671	CD38/CRHR1/STX4/NDUFAF2	4
BP	GO:0031279	regulation of cyclase activity	2/51	43/18670	0.0061502	0.077762	0.0576715	ADORA2B/CRHR1	2
BP	GO:0006836	neurotransmitter transport	4/51	269/18670	0.00619299	0.077762	0.0576715	ADORA2B/SNCA/STX4/STX1B	4
BP	GO:1901028	regulation of mitochondrial outer membrane permeabilization involved in apoptotic signaling pathway	2/51	44/18670	0.00643188	0.0794317	0.0589099	NMT1/HIP1R	2
BP	GO:0007189	adenylate cyclase-activating G protein-coupled receptor signaling pathway	3/51	139/18670	0.00647902	0.0794317	0.0589099	ADORA2B/CRHR1/RIT2	3
BP	GO:0051588	regulation of neurotransmitter transport	3/51	139/18670	0.00647902	0.0794317	0.0589099	ADORA2B/SNCA/STX1B	3
BP	GO:0060078	regulation of postsynaptic membrane potential	3/51	140/18670	0.00660828	0.0803836	0.0596158	SNCA/IGSF9B/STX1B	3
BP	GO:0019932	second-messenger-mediated signaling	5/51	439/18670	0.00678933	0.0816702	0.0605701	ADORA2B/CRHR1/DGKQ/MAPT/RIT2	5
BP	GO:0010675	regulation of cellular carbohydrate metabolic process	3/51	142/18670	0.00687142	0.0816702	0.0605701	SCARB2/DGKQ/SNCA	3
BP	GO:1900542	regulation of purine nucleotide metabolic process	3/51	142/18670	0.00687142	0.0816702	0.0605701	ADORA2B/SNCA/NCOR1	3
BP	GO:0051339	regulation of lyase activity	2/51	46/18670	0.00701258	0.0827165	0.0613461	ADORA2B/CRHR1	2
BP	GO:0010976	positive regulation of neuron projection development	4/51	281/18670	0.00720706	0.0843714	0.0625734	SCARB2/MAPT/RIT2/WNT3	4
BP	GO:0043303	mast cell degranulation	2/51	47/18670	0.00731153	0.0845312	0.0626919	ADORA2B/CRHR1	2
BP	GO:0006140	regulation of nucleotide metabolic process	3/51	146/18670	0.00741625	0.0845312	0.0626919	ADORA2B/SNCA/NCOR1	3
BP	GO:0031647	regulation of protein stability	4/51	284/18670	0.00747674	0.0845312	0.0626919	EFNA1/SNCA/HIP1R/ZSWIM7	4
BP	GO:0001774	microglial cell activation	2/51	48/18670	0.00761618	0.0845312	0.0626919	MAPT/SNCA	2
BP	GO:0002269	leukocyte activation involved in inflammatory response	2/51	48/18670	0.00761618	0.0845312	0.0626919	MAPT/SNCA	2
BP	GO:0002279	mast cell activation involved in immune response	2/51	48/18670	0.00761618	0.0845312	0.0626919	ADORA2B/CRHR1	2
BP	GO:0046850	regulation of bone remodeling	2/51	48/18670	0.00761618	0.0845312	0.0626919	CD38/PLEKHM1	2
BP	GO:0044262	cellular carbohydrate metabolic process	4/51	286/18670	0.00766019	0.0845312	0.0626919	SCARB2/DGKQ/IDUA/SNCA	4
BP	GO:0016570	histone modification	5/51	454/18670	0.00779551	0.0845312	0.0626919	SNCA/SETD1A/RNF40/SRCAP/KAT8	5
BP	GO:0008277	regulation of G protein-coupled receptor signaling pathway	3/51	149/18670	0.00784123	0.0845312	0.0626919	DGKQ/NMT1/SNCA	3
BP	GO:2001056	positive regulation of cysteine-type endopeptidase activity	3/51	149/18670	0.00784123	0.0845312	0.0626919	MAPT/SNCA/HIP1R	3
BP	GO:0002448	mast cell mediated immunity	2/51	49/18670	0.0079265	0.0845312	0.0626919	ADORA2B/CRHR1	2
BP	GO:1990090	cellular response to nerve growth factor stimulus	2/51	49/18670	0.0079265	0.0845312	0.0626919	MAPT/SH3GL2	2
BP	GO:0031113	regulation of microtubule polymerization	2/51	50/18670	0.00824244	0.0873026	0.0647473	MAPT/SNCA	2
BP	GO:0042326	negative regulation of phosphorylation	5/51	468/18670	0.0088248	0.0922896	0.0684459	DGKQ/EFNA1/MAPT/SNCA/NCOR1	5
BP	GO:0016573	histone acetylation	3/51	156/18670	0.00888808	0.0922896	0.0684459	SNCA/SRCAP/KAT8	3
BP	GO:1990089	response to nerve growth factor	2/51	52/18670	0.0088911	0.0922896	0.0684459	MAPT/SH3GL2	2
BP	GO:0006164	purine nucleotide biosynthetic process	4/51	300/18670	0.0090281	0.0926414	0.0687068	ADORA2B/SNCA/NCOR1/SLC26A1	4
BP	GO:0043271	negative regulation of ion transport	3/51	157/18670	0.00904399	0.0926414	0.0687068	CRHR1/SNCA/STK39	3
BP	GO:0016569	covalent chromatin modification	5/51	474/18670	0.00929356	0.0945757	0.0701413	SNCA/SETD1A/RNF40/SRCAP/KAT8	5
BP	GO:0097345	mitochondrial outer membrane permeabilization	2/51	54/18670	0.00956191	0.0966746	0.071698	NMT1/HIP1R	2
BP	GO:0018393	internal peptidyl-lysine acetylation	3/51	161/18670	0.00968371	0.0972745	0.0721429	SNCA/SRCAP/KAT8	3
BP	GO:0009895	negative regulation of catabolic process	4/51	308/18670	0.00987725	0.0980033	0.0726834	EFNA1/SNCA/LAMP3/DDRGK1	4
BP	GO:0042220	response to cocaine	2/51	55/18670	0.00990553	0.0980033	0.0726834	CRHR1/SNCA	2
BP	GO:0015711	organic anion transport	5/51	482/18670	0.0099451	0.0980033	0.0726834	SCARB2/SNCA/NCOR1/SLC26A1/STK39	5
CC	GO:0030666	endocytic vesicle membrane	5/52	167/19717	7.73e-05	0.0127917	0.00842423	SCARB2/SH3GL2/STX4/WNT3/HIP1R	5
CC	GO:0030139	endocytic vesicle	6/52	303/19717	0.000140854	0.0127917	0.00842423	FMNL1/SCARB2/SH3GL2/STX4/WNT3/HIP1R	6
CC	GO:0098793	presynapse	7/52	491/19717	0.000288711	0.0127917	0.00842423	DGKQ/GAK/SH3GL2/SNCA/STX4/RNF40/STX1B	7
CC	GO:0005765	lysosomal membrane	6/52	354/19717	0.000325784	0.0127917	0.00842423	SCARB2/NSF/PLEKHM1/LAMP3/TMEM175/SPPL2C	6
CC	GO:0098852	lytic vacuole membrane	6/52	355/19717	0.000330723	0.0127917	0.00842423	SCARB2/NSF/PLEKHM1/LAMP3/TMEM175/SPPL2C	6
CC	GO:0034399	nuclear periphery	4/52	131/19717	0.000393591	0.0127917	0.00842423	DGKQ/MAPT/PRR14/KAT8	4
CC	GO:0005774	vacuolar membrane	6/52	412/19717	0.00072528	0.0202042	0.0133059	SCARB2/NSF/PLEKHM1/LAMP3/TMEM175/SPPL2C	6
CC	GO:0008021	synaptic vesicle	4/52	191/19717	0.00160683	0.0381939	0.0251534	SH3GL2/SNCA/STX4/STX1B	4
CC	GO:0043025	neuronal cell body	6/52	497/19717	0.0018974	0.0381939	0.0251534	CRHR1/MAPT/SH3GL2/SNCA/HIP1R/IGSF9B	6
CC	GO:0043202	lysosomal lumen	3/52	95/19717	0.00201842	0.0381939	0.0251534	SCARB2/CTSB/IDUA	3
CC	GO:0070382	exocytic vesicle	4/52	207/19717	0.00215453	0.0381939	0.0251534	SH3GL2/SNCA/STX4/STX1B	4
CC	GO:0016323	basolateral plasma membrane	4/52	217/19717	0.00255568	0.0415298	0.0273503	CD38/STX4/SLC26A1/STK39	4
CC	GO:0048787	presynaptic active zone membrane	2/52	30/19717	0.00283057	0.0424586	0.0279619	STX4/STX1B	2
CC	GO:0030665	clathrin-coated vesicle membrane	3/52	115/19717	0.00346972	0.0483283	0.0318275	SCARB2/SH3GL2/HIP1R	3
CC	GO:0030669	clathrin-coated endocytic vesicle membrane	2/52	44/19717	0.00601243	0.0781615	0.0514748	SH3GL2/HIP1R	2
CC	GO:0031201	SNARE complex	2/52	47/19717	0.00683591	0.0808316	0.0532332	STX4/STX1B	2
CC	GO:0030135	coated vesicle	4/52	289/19717	0.00704686	0.0808316	0.0532332	SCARB2/IDUA/SH3GL2/HIP1R	4
MF	GO:0000149	SNARE binding	5/48	110/17697	1.17e-05	0.0026483	0.00218327	NSF/SNCA/STX4/RNF40/STX1B	5
MF	GO:0043274	phospholipase binding	2/48	16/17697	0.000843745	0.0953432	0.0786015	DGKQ/SNCA	2
KEGG	hsa04142	Lysosome	4/22	128/8076	0.000352965	0.019766	0.0185771	SCARB2/CTSB/IDUA/LAMP3	4
KEGG	hsa04130	SNARE interactions in vesicular transport	2/22	33/8076	0.00355406	0.0995136	0.0935278	STX4/STX1B	2
