# Supplementary material for: Joint analysis of proteome, transcriptome, and multi-trait analysis to identify novel Parkinson’s disease risk genes
Source: Aging (Albany NY). 2024 Jan 17;16(2):1555–80. doi: 10.18632/aging.205444 (PMC10866412; doi:10.18632/aging.205444)
Supplement: Supplementary Table 21 [file aging-16-205444-s020.xlsx]

## Sheet: Additional file17 (Table S16)
Supplementary Table 21. Pathway analysis of 22 tissues S-PrediXcan results (PD GWAS).
ONTOLOGY	ID	Description	GeneRatio	BgRatio	p-value	p.adjust	q-value	geneID	Count
BP	GO:0010977	negative regulation of neuron projection development	7/62	155/18670	7.96e-07	0.00139211	0.00108248	CD38/EFNA1/GAK/RIT2/WNT3/RAB29/STX1B	7
BP	GO:0031345	negative regulation of cell projection organization	7/62	188/18670	2.89e-06	0.00155694	0.00121066	CD38/EFNA1/GAK/RIT2/WNT3/RAB29/STX1B	7
BP	GO:0036465	synaptic vesicle recycling	5/62	69/18670	3.27e-06	0.00155694	0.00121066	DGKQ/GAK/SH3GL2/SNCA/STX1B	5
BP	GO:0099504	synaptic vesicle cycle	7/62	194/18670	3.56e-06	0.00155694	0.00121066	ADORA2B/DGKQ/GAK/SH3GL2/SNCA/STX4/STX1B	7
BP	GO:0010975	regulation of neuron projection development	10/62	499/18670	5.25e-06	0.00159144	0.00123748	SCARB2/CD38/EFNA1/GAK/MAPT/RIT2/WNT3/RAB29/LZTS3/STX1B	10
BP	GO:0099003	vesicle-mediated transport in synapse	7/62	207/18670	5.46e-06	0.00159144	0.00123748	ADORA2B/DGKQ/GAK/SH3GL2/SNCA/STX4/STX1B	7
BP	GO:0045665	negative regulation of neuron differentiation	7/62	225/18670	9.42e-06	0.00235356	0.0018301	CD38/EFNA1/GAK/RIT2/WNT3/RAB29/STX1B	7
BP	GO:0001921	positive regulation of receptor recycling	3/62	15/18670	1.54e-05	0.00337179	0.00262186	NSF/SNCA/RAB29	3
BP	GO:0045862	positive regulation of proteolysis	8/62	363/18670	2.56e-05	0.00497268	0.0038667	EFNA1/EFNA3/GBA/MAPT/SNCA/HIP1R/RNF40/DDRGK1	8
BP	GO:0048488	synaptic vesicle endocytosis	4/62	56/18670	3.56e-05	0.00565682	0.00439867	DGKQ/GAK/SH3GL2/SNCA	4
BP	GO:0140238	presynaptic endocytosis	4/62	56/18670	3.56e-05	0.00565682	0.00439867	DGKQ/GAK/SH3GL2/SNCA	4
BP	GO:0010952	positive regulation of peptidase activity	6/62	197/18670	4.81e-05	0.00701105	0.0054517	EFNA1/EFNA3/MAPT/SNCA/HIP1R/DDRGK1	6
BP	GO:0050768	negative regulation of neurogenesis	7/62	295/18670	5.35e-05	0.00720415	0.00560186	CD38/EFNA1/GAK/RIT2/WNT3/RAB29/STX1B	7
BP	GO:0001919	regulation of receptor recycling	3/62	24/18670	6.72e-05	0.00734125	0.00570846	NSF/SNCA/RAB29	3
BP	GO:0043302	positive regulation of leukocyte degranulation	3/62	24/18670	6.72e-05	0.00734125	0.00570846	ADORA2B/CRHR1/STX4	3
BP	GO:1903421	regulation of synaptic vesicle recycling	3/62	24/18670	6.72e-05	0.00734125	0.00570846	DGKQ/SNCA/STX1B	3
BP	GO:0051961	negative regulation of nervous system development	7/62	315/18670	8.09e-05	0.00798796	0.00621134	CD38/EFNA1/GAK/RIT2/WNT3/RAB29/STX1B	7
BP	GO:0017157	regulation of exocytosis	6/62	217/18670	8.22e-05	0.00798796	0.00621134	ADORA2B/CRHR1/NSF/SNCA/STX4/STX1B	6
BP	GO:0050804	modulation of chemical synaptic transmission	8/62	436/18670	9.3e-05	0.00802605	0.00624096	ADORA2B/CD38/CRHR1/MAPT/SNCA/STX4/IGSF9B/STX1B	8
BP	GO:0099177	regulation of trans-synaptic signaling	8/62	437/18670	9.45e-05	0.00802605	0.00624096	ADORA2B/CD38/CRHR1/MAPT/SNCA/STX4/IGSF9B/STX1B	8
BP	GO:0051953	negative regulation of amine transport	3/62	27/18670	9.64e-05	0.00802605	0.00624096	CRHR1/SNCA/STK39	3
BP	GO:0010721	negative regulation of cell development	7/62	344/18670	0.000139755	0.0111105	0.00863942	CD38/EFNA1/GAK/RIT2/WNT3/RAB29/STX1B	7
BP	GO:0002888	positive regulation of myeloid leukocyte mediated immunity	3/62	31/18670	0.000146698	0.0111554	0.00867433	ADORA2B/CRHR1/STX4	3
BP	GO:0061025	membrane fusion	5/62	154/18670	0.000158518	0.011552	0.0089827	NSF/SNCA/STX4/TMEM175/STX1B	5
BP	GO:0043543	protein acylation	6/62	248/18670	0.000170648	0.0119385	0.00928324	MAPT/NMT1/SNCA/SRCAP/KAT8/KANSL1	6
BP	GO:0045921	positive regulation of exocytosis	4/62	88/18670	0.000208655	0.0137064	0.0106579	ADORA2B/CRHR1/SNCA/STX4	4
BP	GO:0001881	receptor recycling	3/62	35/18670	0.00021159	0.0137064	0.0106579	NSF/SNCA/RAB29	3
BP	GO:0006475	internal protein amino acid acetylation	5/62	166/18670	0.000224842	0.0140446	0.0109209	MAPT/SNCA/SRCAP/KAT8/KANSL1	5
BP	GO:0050806	positive regulation of synaptic transmission	5/62	168/18670	0.000237683	0.0143348	0.0111465	CRHR1/SNCA/STX4/IGSF9B/STX1B	5
BP	GO:0042176	regulation of protein catabolic process	7/62	381/18670	0.00026123	0.015168	0.0117944	EFNA1/GBA/NSF/SNCA/RNF40/LAMP3/DDRGK1	7
BP	GO:0006906	vesicle fusion	4/62	94/18670	0.000268844	0.015168	0.0117944	SNCA/STX4/TMEM175/STX1B	4
BP	GO:0010950	positive regulation of endopeptidase activity	5/62	178/18670	0.000310472	0.0167296	0.0130087	EFNA1/EFNA3/MAPT/SNCA/HIP1R	5
BP	GO:0072583	clathrin-dependent endocytosis	3/62	40/18670	0.000315653	0.0167296	0.0130087	GAK/SH3GL2/HIP1R	3
BP	GO:0030100	regulation of endocytosis	6/62	281/18670	0.000334166	0.0170203	0.0132348	DGKQ/RIT2/SH3GL2/SNCA/HIP1R/STX1B	6
BP	GO:0090174	organelle membrane fusion	4/62	100/18670	0.0003406	0.0170203	0.0132348	SNCA/STX4/TMEM175/STX1B	4
BP	GO:0048167	regulation of synaptic plasticity	5/62	187/18670	0.000389422	0.0189194	0.0147115	CD38/CRHR1/MAPT/SNCA/STX4	5
BP	GO:0043300	regulation of leukocyte degranulation	3/62	46/18670	0.000478156	0.0215252	0.0167377	ADORA2B/CRHR1/STX4	3
BP	GO:0043471	regulation of cellular carbohydrate catabolic process	2/62	10/18670	0.000479979	0.0215252	0.0167377	SCARB2/PHKG2	2
BP	GO:1990416	cellular response to brain-derived neurotrophic factor stimulus	2/62	10/18670	0.000479979	0.0215252	0.0167377	MAPT/SH3GL2	2
BP	GO:0098693	regulation of synaptic vesicle cycle	4/62	112/18670	0.000523702	0.0228989	0.0178059	ADORA2B/DGKQ/SNCA/STX1B	4
BP	GO:0006473	protein acetylation	5/62	204/18670	0.000578936	0.0240465	0.0186982	MAPT/SNCA/SRCAP/KAT8/KANSL1	5
BP	GO:1905245	regulation of aspartic-type peptidase activity	2/62	11/18670	0.000585386	0.0240465	0.0186982	EFNA1/EFNA3	2
BP	GO:1901214	regulation of neuron death	6/62	313/18670	0.000591194	0.0240465	0.0186982	CRHR1/GBA/MAPT/SNCA/RAB29/GPNMB	6
BP	GO:0006109	regulation of carbohydrate metabolic process	5/62	206/18670	0.000605099	0.0240527	0.0187031	SCARB2/DGKQ/PHKG2/SNCA/NCOR1	5
BP	GO:0006898	receptor-mediated endocytosis	6/62	316/18670	0.000621504	0.0241558	0.0187832	SCARB2/GAK/SH3GL2/SNCA/HIP1R/ARHGAP27	6
BP	GO:0016079	synaptic vesicle exocytosis	4/62	119/18670	0.000658088	0.0248909	0.0193548	ADORA2B/SNCA/STX4/STX1B	4
BP	GO:0070493	thrombin-activated receptor signaling pathway	2/62	12/18670	0.000700961	0.0248909	0.0193548	DGKQ/SNCA	2
BP	GO:1903050	regulation of proteolysis involved in cellular protein catabolic process	5/62	214/18670	0.000718728	0.0248909	0.0193548	EFNA1/GBA/RNF40/LAMP3/DDRGK1	5
BP	GO:0016050	vesicle organization	6/62	325/18670	0.000719738	0.0248909	0.0193548	SCARB2/NSF/SNCA/STX4/TMEM175/STX1B	6
BP	GO:0052547	regulation of peptidase activity	7/62	452/18670	0.000725551	0.0248909	0.0193548	EFNA1/EFNA3/MAPT/SNCA/HIP1R/LAMP3/DDRGK1	7
BP	GO:1903307	positive regulation of regulated secretory pathway	3/62	53/18670	0.000725806	0.0248909	0.0193548	ADORA2B/CRHR1/STX4	3
BP	GO:0048284	organelle fusion	4/62	124/18670	0.000767925	0.0258289	0.0200842	SNCA/STX4/TMEM175/STX1B	4
BP	GO:0002886	regulation of myeloid leukocyte mediated immunity	3/62	55/18670	0.000809011	0.0266974	0.0207595	ADORA2B/CRHR1/STX4	3
BP	GO:0023061	signal release	7/62	462/18670	0.000824931	0.0267186	0.020776	ADORA2B/CD38/CRHR1/SNCA/STX4/NDUFAF2/STX1B	7
BP	GO:0042177	negative regulation of protein catabolic process	4/62	132/18670	0.00096972	0.0308371	0.0239785	EFNA1/SNCA/LAMP3/DDRGK1	4
BP	GO:0032890	regulation of organic acid transport	3/62	59/18670	0.000993071	0.0310157	0.0241174	SNCA/NCOR1/STK39	3
BP	GO:0070997	neuron death	6/62	348/18670	0.00102584	0.031477	0.0244761	CRHR1/GBA/MAPT/SNCA/RAB29/GPNMB	6
BP	GO:0007040	lysosome organization	3/62	61/18670	0.00109424	0.0317696	0.0247036	SCARB2/GBA/TMEM175	3
BP	GO:0080171	lytic vacuole organization	3/62	61/18670	0.00109424	0.0317696	0.0247036	SCARB2/GBA/TMEM175	3
BP	GO:0033008	positive regulation of mast cell activation involved in immune response	2/62	15/18670	0.00110803	0.0317696	0.0247036	ADORA2B/CRHR1	2
BP	GO:0043306	positive regulation of mast cell degranulation	2/62	15/18670	0.00110803	0.0317696	0.0247036	ADORA2B/CRHR1	2
BP	GO:0031646	positive regulation of neurological system process	3/62	63/18670	0.00120169	0.033183	0.0258027	GBA/IGSF9B/STX1B	3
BP	GO:0048278	vesicle docking	3/62	64/18670	0.00125782	0.033183	0.0258027	NSF/STX4/STX1B	3
BP	GO:0043981	histone H4-K5 acetylation	2/62	16/18670	0.00126362	0.033183	0.0258027	KAT8/KANSL1	2
BP	GO:0043982	histone H4-K8 acetylation	2/62	16/18670	0.00126362	0.033183	0.0258027	KAT8/KANSL1	2
BP	GO:2000369	regulation of clathrin-dependent endocytosis	2/62	16/18670	0.00126362	0.033183	0.0258027	SH3GL2/HIP1R	2
BP	GO:0010675	regulation of cellular carbohydrate metabolic process	4/62	142/18670	0.00127116	0.033183	0.0258027	SCARB2/DGKQ/PHKG2/SNCA	4
BP	GO:1903362	regulation of cellular protein catabolic process	5/62	247/18670	0.00136295	0.0350559	0.027259	EFNA1/GBA/RNF40/LAMP3/DDRGK1	5
BP	GO:0048489	synaptic vesicle transport	4/62	152/18670	0.00163283	0.0407973	0.0317235	ADORA2B/SNCA/STX4/STX1B	4
BP	GO:0097480	establishment of synaptic vesicle localization	4/62	152/18670	0.00163283	0.0407973	0.0317235	ADORA2B/SNCA/STX4/STX1B	4
BP	GO:0017156	calcium ion regulated exocytosis	4/62	154/18670	0.00171291	0.0413242	0.0321332	ADORA2B/SNCA/STX4/STX1B	4
BP	GO:0050805	negative regulation of synaptic transmission	3/62	72/18670	0.00176691	0.0413242	0.0321332	CD38/MAPT/SNCA	3
BP	GO:1903051	negative regulation of proteolysis involved in cellular protein catabolic process	3/62	72/18670	0.00176691	0.0413242	0.0321332	EFNA1/LAMP3/DDRGK1	3
BP	GO:0016082	synaptic vesicle priming	2/62	19/18670	0.00178914	0.0413242	0.0321332	SNCA/STX1B	2
BP	GO:0035493	SNARE complex assembly	2/62	19/18670	0.00178914	0.0413242	0.0321332	SNCA/STX4	2
BP	GO:0016573	histone acetylation	4/62	156/18670	0.00179568	0.0413242	0.0321332	SNCA/SRCAP/KAT8/KANSL1	4
BP	GO:0032418	lysosome localization	3/62	74/18670	0.00191147	0.0423107	0.0329003	ADORA2B/CRHR1/PLEKHM1	3
BP	GO:1903305	regulation of regulated secretory pathway	4/62	160/18670	0.00196949	0.0423107	0.0329003	ADORA2B/CRHR1/STX4/STX1B	4
BP	GO:0033005	positive regulation of mast cell activation	2/62	20/18670	0.00198369	0.0423107	0.0329003	ADORA2B/CRHR1	2
BP	GO:0033194	response to hydroperoxide	2/62	20/18670	0.00198369	0.0423107	0.0329003	CD38/STX4	2
BP	GO:0048148	behavioral response to cocaine	2/62	20/18670	0.00198369	0.0423107	0.0329003	CRHR1/SNCA	2
BP	GO:1902993	positive regulation of amyloid precursor protein catabolic process	2/62	20/18670	0.00198369	0.0423107	0.0329003	EFNA1/EFNA3	2
BP	GO:0018393	internal peptidyl-lysine acetylation	4/62	161/18670	0.0020147	0.0424543	0.0330119	SNCA/SRCAP/KAT8/KANSL1	4
BP	GO:1903532	positive regulation of secretion by cell	6/62	399/18670	0.00205641	0.0428174	0.0332942	ADORA2B/CD38/CRHR1/SNCA/STX4/STX1B	6
BP	GO:0097479	synaptic vesicle localization	4/62	163/18670	0.00210726	0.04336	0.0337162	ADORA2B/SNCA/STX4/STX1B	4
BP	GO:0001956	positive regulation of neurotransmitter secretion	2/62	21/18670	0.00218782	0.0439828	0.0342005	SNCA/STX1B	2
BP	GO:0043984	histone H4-K16 acetylation	2/62	21/18670	0.00218782	0.0439828	0.0342005	KAT8/KANSL1	2
BP	GO:0050808	synapse organization	6/62	408/18670	0.00229927	0.0456747	0.0355161	EFNA1/MAPT/SNCA/RAB29/LZTS3/IGSF9B	6
BP	GO:0140029	exocytic process	3/62	80/18670	0.00238871	0.0456747	0.0355161	SNCA/STX4/STX1B	3
BP	GO:0031629	synaptic vesicle fusion to presynaptic active zone membrane	2/62	22/18670	0.00240147	0.0456747	0.0355161	STX4/STX1B	2
BP	GO:0007269	neurotransmitter secretion	4/62	169/18670	0.00240256	0.0456747	0.0355161	ADORA2B/SNCA/STX4/STX1B	4
BP	GO:0018394	peptidyl-lysine acetylation	4/62	169/18670	0.00240256	0.0456747	0.0355161	SNCA/SRCAP/KAT8/KANSL1	4
BP	GO:0099643	signal release from synapse	4/62	170/18670	0.0024544	0.0461586	0.0358923	ADORA2B/SNCA/STX4/STX1B	4
BP	GO:0044262	cellular carbohydrate metabolic process	5/62	286/18670	0.00258509	0.0480991	0.0374013	SCARB2/DGKQ/IDUA/PHKG2/SNCA	5
BP	GO:0099500	vesicle fusion to plasma membrane	2/62	23/18670	0.00262457	0.0483198	0.0375728	STX4/STX1B	2
BP	GO:0051650	establishment of vesicle localization	5/62	290/18670	0.0027445	0.0496118	0.0385775	ADORA2B/NSF/SNCA/STX4/STX1B	5
BP	GO:0009896	positive regulation of catabolic process	6/62	423/18670	0.00275149	0.0496118	0.0385775	GBA/NSF/PHKG2/SNCA/RNF40/DDRGK1	6
BP	GO:0052548	regulation of endopeptidase activity	6/62	425/18670	0.00281649	0.0498167	0.0387368	EFNA1/EFNA3/MAPT/SNCA/HIP1R/LAMP3	6
BP	GO:0010640	regulation of platelet-derived growth factor receptor signaling pathway	2/62	24/18670	0.00285707	0.0498167	0.0387368	SNCA/HIP1R	2
BP	GO:0051047	positive regulation of secretion	6/62	428/18670	0.00291617	0.0498167	0.0387368	ADORA2B/CD38/CRHR1/SNCA/STX4/STX1B	6
BP	GO:0006919	activation of cysteine-type endopeptidase activity involved in apoptotic process	3/62	86/18670	0.00293375	0.0498167	0.0387368	MAPT/SNCA/HIP1R	3
BP	GO:0060291	long-term synaptic potentiation	3/62	86/18670	0.00293375	0.0498167	0.0387368	CRHR1/SNCA/STX4	3
BP	GO:1903363	negative regulation of cellular protein catabolic process	3/62	86/18670	0.00293375	0.0498167	0.0387368	EFNA1/LAMP3/DDRGK1	3
BP	GO:0034103	regulation of tissue remodeling	3/62	88/18670	0.00313102	0.0517749	0.0402595	CD38/PLEKHM1/GPNMB	3
BP	GO:0043470	regulation of carbohydrate catabolic process	3/62	88/18670	0.00313102	0.0517749	0.0402595	SCARB2/PHKG2/NCOR1	3
BP	GO:0010821	regulation of mitochondrion organization	4/62	182/18670	0.00313787	0.0517749	0.0402595	GBA/MAPT/NMT1/HIP1R	4
BP	GO:0061136	regulation of proteasomal protein catabolic process	4/62	183/18670	0.00320011	0.0523084	0.0406743	GBA/RNF40/LAMP3/DDRGK1	4
BP	GO:0032410	negative regulation of transporter activity	3/62	89/18670	0.00323264	0.0523508	0.0407073	CRHR1/SNCA/STK39	3
BP	GO:0019932	second-messenger-mediated signaling	6/62	439/18670	0.00330445	0.0530227	0.0412298	ADORA2B/BST1/CRHR1/DGKQ/MAPT/RIT2	6
BP	GO:0097066	response to thyroid hormone	2/62	26/18670	0.00334997	0.0532645	0.0414178	CTSB/GBA	2
BP	GO:0051648	vesicle localization	5/62	306/18670	0.00345419	0.0539928	0.0419841	ADORA2B/NSF/SNCA/STX4/STX1B	5
BP	GO:0019933	cAMP-mediated signaling	4/62	187/18670	0.00345751	0.0539928	0.0419841	ADORA2B/CRHR1/DGKQ/RIT2	4
BP	GO:1990778	protein localization to cell periphery	5/62	311/18670	0.00370082	0.0572808	0.0445408	GAK/NSF/STX4/RAB29/STX1B	5
BP	GO:0043112	receptor metabolic process	4/62	192/18670	0.00379867	0.0582214	0.0452722	NSF/SH3GL2/SNCA/RAB29	4
BP	GO:0044070	regulation of anion transport	3/62	95/18670	0.00388491	0.0582214	0.0452722	SNCA/NCOR1/STK39	3
BP	GO:0051952	regulation of amine transport	3/62	95/18670	0.00388491	0.0582214	0.0452722	CRHR1/SNCA/STK39	3
BP	GO:0016570	histone modification	6/62	454/18670	0.00389474	0.0582214	0.0452722	SNCA/SETD1A/RNF40/SRCAP/KAT8/KANSL1	6
BP	GO:0050848	regulation of calcium-mediated signaling	3/62	98/18670	0.00423895	0.0628299	0.0488557	BST1/MAPT/RIT2	3
BP	GO:1903829	positive regulation of cellular protein localization	5/62	324/18670	0.00440108	0.0646848	0.050298	MAPT/NMT1/STX4/RAB29/DDRGK1	5
BP	GO:0042326	negative regulation of phosphorylation	6/62	468/18670	0.00451342	0.0657832	0.0511521	DGKQ/EFNA1/GBA/MAPT/SNCA/NCOR1	6
BP	GO:0010506	regulation of autophagy	5/62	327/18670	0.00457525	0.0661332	0.0514243	GBA/MAPT/SNCA/LAMP3/KAT8	5
BP	GO:0015837	amine transport	3/62	102/18670	0.00474063	0.0668881	0.0520113	CRHR1/SNCA/STK39	3
BP	GO:0043304	regulation of mast cell degranulation	2/62	31/18670	0.00474221	0.0668881	0.0520113	ADORA2B/CRHR1	2
BP	GO:0060292	long-term synaptic depression	2/62	31/18670	0.00474221	0.0668881	0.0520113	CD38/MAPT	2
BP	GO:0016569	covalent chromatin modification	6/62	474/18670	0.00479974	0.067158	0.0522212	SNCA/SETD1A/RNF40/SRCAP/KAT8/KANSL1	6
BP	GO:0006892	post-Golgi vesicle-mediated transport	3/62	104/18670	0.00500437	0.0679095	0.0528056	GAK/NSF/STX4	3
BP	GO:0046928	regulation of neurotransmitter secretion	3/62	104/18670	0.00500437	0.0679095	0.0528056	ADORA2B/SNCA/STX1B	3
BP	GO:1901800	positive regulation of proteasomal protein catabolic process	3/62	104/18670	0.00500437	0.0679095	0.0528056	GBA/RNF40/DDRGK1	3
BP	GO:1901215	negative regulation of neuron death	4/62	208/18670	0.00504275	0.0679095	0.0528056	CRHR1/GBA/SNCA/GPNMB	4
BP	GO:0033006	regulation of mast cell activation involved in immune response	2/62	32/18670	0.00504759	0.0679095	0.0528056	ADORA2B/CRHR1	2
BP	GO:0051955	regulation of amino acid transport	2/62	33/18670	0.00536181	0.071044	0.0552429	SNCA/STK39	2
BP	GO:2001024	negative regulation of response to drug	2/62	33/18670	0.00536181	0.071044	0.0552429	SNCA/STK39	2
BP	GO:0099565	chemical synaptic transmission, postsynaptic	3/62	108/18670	0.00555802	0.0727301	0.056554	SNCA/IGSF9B/STX1B	3
BP	GO:0045732	positive regulation of protein catabolic process	4/62	214/18670	0.00557223	0.0727301	0.056554	GBA/NSF/RNF40/DDRGK1	4
BP	GO:0019935	cyclic-nucleotide-mediated signaling	4/62	215/18670	0.00566396	0.0728401	0.0566395	ADORA2B/CRHR1/DGKQ/RIT2	4
BP	GO:0043281	regulation of cysteine-type endopeptidase activity involved in apoptotic process	4/62	215/18670	0.00566396	0.0728401	0.0566395	MAPT/SNCA/HIP1R/LAMP3	4
BP	GO:0050920	regulation of chemotaxis	4/62	217/18670	0.00585042	0.0746303	0.0580316	BST1/STX4/WNT3/STK39	4
BP	GO:0006914	autophagy	6/62	496/18670	0.00596539	0.0746303	0.0580316	GBA/MAPT/SNCA/PLEKHM1/LAMP3/KAT8	6
BP	GO:0061919	process utilizing autophagic mechanism	6/62	496/18670	0.00596539	0.0746303	0.0580316	GBA/MAPT/SNCA/PLEKHM1/LAMP3/KAT8	6
BP	GO:1901030	positive regulation of mitochondrial outer membrane permeabilization involved in apoptotic signaling pathway	2/62	35/18670	0.00601651	0.0746303	0.0580316	NMT1/HIP1R	2
BP	GO:1902991	regulation of amyloid precursor protein catabolic process	2/62	35/18670	0.00601651	0.0746303	0.0580316	EFNA1/EFNA3	2
BP	GO:0090322	regulation of superoxide metabolic process	2/62	36/18670	0.00635688	0.078297	0.0608828	BST1/MAPT	2
BP	GO:0050803	regulation of synapse structure or activity	4/62	227/18670	0.00684441	0.0830677	0.0645924	EFNA1/SNCA/LZTS3/STX1B	4
BP	GO:0031331	positive regulation of cellular catabolic process	5/62	361/18670	0.00690733	0.0830677	0.0645924	GBA/PHKG2/SNCA/RNF40/DDRGK1	5
BP	GO:0010822	positive regulation of mitochondrion organization	3/62	117/18670	0.00693418	0.0830677	0.0645924	GBA/NMT1/HIP1R	3
BP	GO:1900371	regulation of purine nucleotide biosynthetic process	3/62	117/18670	0.00693418	0.0830677	0.0645924	ADORA2B/SNCA/NCOR1	3
BP	GO:0007190	activation of adenylate cyclase activity	2/62	38/18670	0.00706335	0.0833233	0.0647912	ADORA2B/CRHR1	2
BP	GO:0051590	positive regulation of neurotransmitter transport	2/62	38/18670	0.00706335	0.0833233	0.0647912	SNCA/STX1B	2
BP	GO:0030808	regulation of nucleotide biosynthetic process	3/62	118/18670	0.00709844	0.0833233	0.0647912	ADORA2B/SNCA/NCOR1	3
BP	GO:1903052	positive regulation of proteolysis involved in cellular protein catabolic process	3/62	120/18670	0.00743387	0.086679	0.0674005	GBA/RNF40/DDRGK1	3
BP	GO:0044058	regulation of digestive system process	2/62	40/18670	0.00780373	0.0897942	0.0698229	HIP1R/STK39	2
BP	GO:0045124	regulation of bone resorption	2/62	40/18670	0.00780373	0.0897942	0.0698229	CD38/PLEKHM1	2
BP	GO:0051048	negative regulation of secretion	4/62	238/18670	0.00806067	0.0921446	0.0716504	CRHR1/SNCA/STK39/NDUFAF2	4
BP	GO:2000116	regulation of cysteine-type endopeptidase activity	4/62	239/18670	0.00817782	0.0923754	0.0718299	MAPT/SNCA/HIP1R/LAMP3	4
BP	GO:0030890	positive regulation of B cell proliferation	2/62	41/18670	0.0081865	0.0923754	0.0718299	BST1/CD38	2
BP	GO:0002696	positive regulation of leukocyte activation	5/62	380/18670	0.0085223	0.0955481	0.074297	ADORA2B/BST1/CD38/CRHR1/STX4	5
BP	GO:0033003	regulation of mast cell activation	2/62	42/18670	0.00857757	0.0955552	0.0743025	ADORA2B/CRHR1	2
BP	GO:0031346	positive regulation of cell projection organization	5/62	383/18670	0.00879933	0.0974053	0.0757411	SCARB2/MAPT/RIT2/WNT3/PLEKHM1	5
BP	GO:0031279	regulation of cyclase activity	2/62	43/18670	0.00897689	0.0987458	0.0767835	ADORA2B/CRHR1	2
CC	GO:0034399	nuclear periphery	5/63	131/19717	6.19e-05	0.00865488	0.00563782	ERCC8/DGKQ/MAPT/PRR14/KAT8	5
CC	GO:0005765	lysosomal membrane	7/63	354/19717	0.000132227	0.00865488	0.00563782	SCARB2/GBA/NSF/PLEKHM1/LAMP3/TMEM175/SPPL2C	7
CC	GO:0098852	lytic vacuole membrane	7/63	355/19717	0.000134551	0.00865488	0.00563782	SCARB2/GBA/NSF/PLEKHM1/LAMP3/TMEM175/SPPL2C	7
CC	GO:0098793	presynapse	8/63	491/19717	0.000162641	0.00865488	0.00563782	DGKQ/GAK/SH3GL2/SNCA/STX4/RNF40/TMEM163/STX1B	8
CC	GO:0030666	endocytic vesicle membrane	5/63	167/19717	0.000194056	0.00865488	0.00563782	SCARB2/SH3GL2/STX4/WNT3/HIP1R	5
CC	GO:0043202	lysosomal lumen	4/63	95/19717	0.000242331	0.00900662	0.00586695	SCARB2/CTSB/GBA/IDUA	4
CC	GO:0005774	vacuolar membrane	7/63	412/19717	0.000333831	0.01006	0.00655313	SCARB2/GBA/NSF/PLEKHM1/LAMP3/TMEM175/SPPL2C	7
CC	GO:0008021	synaptic vesicle	5/63	191/19717	0.000360897	0.01006	0.00655313	SH3GL2/SNCA/STX4/TMEM163/STX1B	5
CC	GO:0030139	endocytic vesicle	6/63	303/19717	0.000408197	0.0101142	0.00658844	FMNL1/SCARB2/SH3GL2/STX4/WNT3/HIP1R	6
CC	GO:0070382	exocytic vesicle	5/63	207/19717	0.000521072	0.0116199	0.00756926	SH3GL2/SNCA/STX4/TMEM163/STX1B	5
CC	GO:0043025	neuronal cell body	7/63	497/19717	0.00101316	0.0205396	0.0133796	ERCC8/CRHR1/MAPT/SH3GL2/SNCA/HIP1R/IGSF9B	7
CC	GO:0005775	vacuolar lumen	4/63	172/19717	0.00223166	0.0414716	0.0270148	SCARB2/CTSB/GBA/IDUA	4
CC	GO:0019898	extrinsic component of membrane	5/63	295/19717	0.00250857	0.0419605	0.0273333	BST1/GBA/NMT1/RNF40/STK39	5
CC	GO:0035097	histone methyltransferase complex	3/63	86/19717	0.00263429	0.0419605	0.0273333	SETD1A/KAT8/KANSL1	3
CC	GO:0044665	MLL1/2 complex	2/63	29/19717	0.00385883	0.0444968	0.0289854	KAT8/KANSL1	2
CC	GO:0071339	MLL1 complex	2/63	29/19717	0.00385883	0.0444968	0.0289854	KAT8/KANSL1	2
CC	GO:0048787	presynaptic active zone membrane	2/63	30/19717	0.00412599	0.0444968	0.0289854	STX4/STX1B	2
CC	GO:0010008	endosome membrane	6/63	479/19717	0.00420294	0.0444968	0.0289854	SCARB2/PLEKHM1/GPNMB/LAMP3/TMEM163/TMEM175	6
CC	GO:0030672	synaptic vesicle membrane	3/63	104/19717	0.00450054	0.0444968	0.0289854	SH3GL2/SNCA/TMEM163	3
CC	GO:0099501	exocytic vesicle membrane	3/63	104/19717	0.00450054	0.0444968	0.0289854	SH3GL2/SNCA/TMEM163	3
CC	GO:0042470	melanosome	3/63	106/19717	0.00474637	0.0444968	0.0289854	CTSB/RAB29/GPNMB	3
CC	GO:0048770	pigment granule	3/63	106/19717	0.00474637	0.0444968	0.0289854	CTSB/RAB29/GPNMB	3
CC	GO:0016323	basolateral plasma membrane	4/63	217/19717	0.00511987	0.0444968	0.0289854	CD38/STX4/SLC26A1/STK39	4
CC	GO:0016363	nuclear matrix	3/63	109/19717	0.0051301	0.0444968	0.0289854	ERCC8/DGKQ/KAT8	3
CC	GO:0005769	early endosome	5/63	350/19717	0.00518797	0.0444968	0.0289854	SH3GL2/RAB29/GPNMB/LAMP3/TMEM163	5
CC	GO:0098984	neuron to neuron synapse	5/63	350/19717	0.00518797	0.0444968	0.0289854	NSF/SH3GL2/HIP1R/LZTS3/IGSF9B	5
CC	GO:0034708	methyltransferase complex	3/63	113/19717	0.00567011	0.0468309	0.0305059	SETD1A/KAT8/KANSL1	3
CC	GO:0030665	clathrin-coated vesicle membrane	3/63	115/19717	0.00595243	0.0474068	0.030881	SCARB2/SH3GL2/HIP1R	3
CC	GO:0005802	trans-Golgi network	4/63	236/19717	0.00686362	0.0527789	0.0343804	CRHR1/GBA/STX4/RAB29	4
CC	GO:1990391	DNA repair complex	2/63	42/19717	0.00796822	0.0581182	0.0378584	ERCC8/ZSWIM7	2
CC	GO:0030133	transport vesicle	5/63	392/19717	0.00828395	0.0581182	0.0378584	SH3GL2/SNCA/STX4/TMEM163/STX1B	5
CC	GO:1902562	H4 histone acetyltransferase complex	2/63	43/19717	0.00833983	0.0581182	0.0378584	KAT8/KANSL1	2
CC	GO:0030669	clathrin-coated endocytic vesicle membrane	2/63	44/19717	0.0087191	0.05892	0.0383807	SH3GL2/HIP1R	2
CC	GO:0031201	SNARE complex	2/63	47/19717	0.00990243	0.0649483	0.0423076	STX4/STX1B	2
CC	GO:0097060	synaptic membrane	5/63	432/19717	0.0122534	0.0780716	0.0508562	STX4/HIP1R/LZTS3/IGSF9B/STX1B	5
CC	GO:0030135	coated vesicle	4/63	289/19717	0.0136873	0.0847853	0.0552295	SCARB2/IDUA/SH3GL2/HIP1R	4
CC	GO:0030667	secretory granule membrane	4/63	298/19717	0.0151594	0.091366	0.0595162	BST1/CD38/SNCA/LAMP3	4
CC	GO:0043197	dendritic spine	3/63	169/19717	0.016874	0.0946705	0.0616688	MAPT/STX4/HIP1R	3
CC	GO:0031225	anchored component of membrane	3/63	170/19717	0.0171388	0.0946705	0.0616688	BST1/EFNA1/EFNA3	3
CC	GO:0045334	clathrin-coated endocytic vesicle	2/63	63/19717	0.0173157	0.0946705	0.0616688	SH3GL2/HIP1R	2
CC	GO:0044309	neuron spine	3/63	171/19717	0.0174058	0.0946705	0.0616688	MAPT/STX4/HIP1R	3
MF	GO:0000149	SNARE binding	5/58	110/17697	2.98e-05	0.00743209	0.00644083	NSF/SNCA/STX4/RNF40/STX1B	5
MF	GO:0043995	histone acetyltransferase activity (H4-K5 specific)	2/58	10/17697	0.000467098	0.0242607	0.0210249	KAT8/KANSL1	2
MF	GO:0043996	histone acetyltransferase activity (H4-K8 specific)	2/58	10/17697	0.000467098	0.0242607	0.0210249	KAT8/KANSL1	2
MF	GO:0046972	histone acetyltransferase activity (H4-K16 specific)	2/58	10/17697	0.000467098	0.0242607	0.0210249	KAT8/KANSL1	2
MF	GO:0016410	N-acyltransferase activity	4/58	113/17697	0.000512672	0.0242607	0.0210249	NMT1/SRCAP/KAT8/KANSL1	4
MF	GO:0016798	hydrolase activity, acting on glycosyl bonds	4/58	117/17697	0.000584594	0.0242607	0.0210249	BST1/CD38/GBA/IDUA	4
MF	GO:0004402	histone acetyltransferase activity	3/58	64/17697	0.00120782	0.0365319	0.0316594	SRCAP/KAT8/KANSL1	3
MF	GO:0043274	phospholipase binding	2/58	16/17697	0.00122995	0.0365319	0.0316594	DGKQ/SNCA	2
MF	GO:0061733	peptide-lysine-N-acetyltransferase activity	3/58	66/17697	0.00132043	0.0365319	0.0316594	SRCAP/KAT8/KANSL1	3
MF	GO:0034212	peptide N-acetyltransferase activity	3/58	75/17697	0.00190828	0.0407953	0.0353542	SRCAP/KAT8/KANSL1	3
MF	GO:0010485	H4 histone acetyltransferase activity	2/58	21/17697	0.00212988	0.0407953	0.0353542	KAT8/KANSL1	2
MF	GO:0016799	hydrolase activity, hydrolyzing N-glycosyl compounds	2/58	21/17697	0.00212988	0.0407953	0.0353542	BST1/CD38	2
MF	GO:0070840	dynein complex binding	2/58	21/17697	0.00212988	0.0407953	0.0353542	SNCA/RAB29	2
MF	GO:0016849	phosphorus-oxygen lyase activity	2/58	22/17697	0.00233794	0.041582	0.036036	BST1/CD38	2
MF	GO:0008080	N-acetyltransferase activity	3/58	90/17697	0.00320681	0.0507614	0.043991	SRCAP/KAT8/KANSL1	3
MF	GO:0017075	syntaxin-1 binding	2/58	26/17697	0.00326177	0.0507614	0.043991	NSF/RNF40	2
MF	GO:0046875	ephrin receptor binding	2/58	27/17697	0.00351532	0.0514892	0.0446218	EFNA1/EFNA3	2
MF	GO:0051087	chaperone binding	3/58	102/17697	0.00455876	0.0605215	0.0524494	SCARB2/GAK/MAPT	3
MF	GO:0005484	SNAP receptor activity	2/58	31/17697	0.00461811	0.0605215	0.0524494	STX4/STX1B	2
MF	GO:0016407	acetyltransferase activity	3/58	110/17697	0.00562543	0.0700366	0.0606954	SRCAP/KAT8/KANSL1	3
MF	GO:0043394	proteoglycan binding	2/58	36/17697	0.00619152	0.0734137	0.0636221	CTSB/GPNMB	2
MF	GO:0016747	transferase activity, transferring acyl groups other than amino-acyl groups	4/58	232/17697	0.00702194	0.0794756	0.0688755	NMT1/SRCAP/KAT8/KANSL1	4
MF	GO:0019894	kinesin binding	2/58	42/17697	0.00835606	0.0904634	0.0783978	SNCA/RAB29	2
MF	GO:0017124	SH3 domain binding	3/58	130/17697	0.00890553	0.0923949	0.0800717	MAPT/HIP1R/ARHGAP27	3
KEGG	hsa04142	Lysosome	5/27	128/8076	5.64e-05	0.00349888	0.003089	SCARB2/CTSB/GBA/IDUA/LAMP3	5
