# Supplementary material for: Joint analysis of proteome, transcriptome, and multi-trait analysis to identify novel Parkinson’s disease risk genes
Source: Aging (Albany NY). 2024 Jan 17;16(2):1555–80. doi: 10.18632/aging.205444 (PMC10866412; doi:10.18632/aging.205444)
Supplement: Supplementary Table 22 [file aging-16-205444-s021.xlsx]

## Sheet: Sheet 1
Supplementary Table 22. Pathway analysis of the digestive system S-PrediXcan results.
ONTOLOGY	ID	Description	GeneRatio	BgRatio	p-value	p.adjust	q-value	geneID	Count
BP	GO:0001921	positive regulation of receptor recycling	3/39	15/18670	3.7684e-06	0.00367554	0.00274472	NSF/SNCA/RAB29	3
BP	GO:0017157	regulation of exocytosis	6/39	217/18670	5.44928e-06	0.00367554	0.00274472	ADORA2B/CRHR1/NSF/SNCA/STX4/STX1B	6
BP	GO:0061025	membrane fusion	5/39	154/18670	1.6427e-05	0.00372018	0.00277805	NSF/SNCA/STX4/TMEM175/STX1B	5
BP	GO:0001919	regulation of receptor recycling	3/39	24/18670	1.65464e-05	0.00372018	0.00277805	NSF/SNCA/RAB29	3
BP	GO:0043302	positive regulation of leukocyte degranulation	3/39	24/18670	1.65464e-05	0.00372018	0.00277805	ADORA2B/CRHR1/STX4	3
BP	GO:1903421	regulation of synaptic vesicle recycling	3/39	24/18670	1.65464e-05	0.00372018	0.00277805	DGKQ/SNCA/STX1B	3
BP	GO:0050806	positive regulation of synaptic transmission	5/39	168/18670	2.49838e-05	0.00442468	0.00330414	CRHR1/SNCA/STX4/IGSF9B/STX1B	5
BP	GO:0050804	modulation of chemical synaptic transmission	7/39	436/18670	2.90909e-05	0.00442468	0.00330414	ADORA2B/CRHR1/MAPT/SNCA/STX4/IGSF9B/STX1B	7
BP	GO:0099177	regulation of trans-synaptic signaling	7/39	437/18670	2.95197e-05	0.00442468	0.00330414	ADORA2B/CRHR1/MAPT/SNCA/STX4/IGSF9B/STX1B	7
BP	GO:0045921	positive regulation of exocytosis	4/39	88/18670	3.34119e-05	0.00446115	0.00333138	ADORA2B/CRHR1/SNCA/STX4	4
BP	GO:0002888	positive regulation of myeloid leukocyte mediated immunity	3/39	31/18670	3.63771e-05	0.00446115	0.00333138	ADORA2B/CRHR1/STX4	3
BP	GO:0006906	vesicle fusion	4/39	94/18670	4.33029e-05	0.00449575	0.00335721	SNCA/STX4/TMEM175/STX1B	4
BP	GO:1901214	regulation of neuron death	6/39	313/18670	4.33245e-05	0.00449575	0.00335721	CRHR1/GBA/MAPT/SNCA/RAB29/GPNMB	6
BP	GO:0099504	synaptic vesicle cycle	5/39	194/18670	4.97152e-05	0.00465262	0.00347435	ADORA2B/DGKQ/SNCA/STX4/STX1B	5
BP	GO:0001881	receptor recycling	3/39	35/18670	5.2662e-05	0.00465262	0.00347435	NSF/SNCA/RAB29	3
BP	GO:0090174	organelle membrane fusion	4/39	100/18670	5.5183e-05	0.00465262	0.00347435	SNCA/STX4/TMEM175/STX1B	4
BP	GO:0099003	vesicle-mediated transport in synapse	5/39	207/18670	6.76366e-05	0.00536716	0.00400794	ADORA2B/DGKQ/SNCA/STX4/STX1B	5
BP	GO:0070997	neuron death	6/39	348/18670	7.79664e-05	0.00584315	0.00436338	CRHR1/GBA/MAPT/SNCA/RAB29/GPNMB	6
BP	GO:0098693	regulation of synaptic vesicle cycle	4/39	112/18670	8.58469e-05	0.00609513	0.00455155	ADORA2B/DGKQ/SNCA/STX1B	4
BP	GO:0016079	synaptic vesicle exocytosis	4/39	119/18670	0.000108613	0.00732597	0.00547069	ADORA2B/SNCA/STX4/STX1B	4
BP	GO:0043300	regulation of leukocyte degranulation	3/39	46/18670	0.000120215	0.00772238	0.00576671	ADORA2B/CRHR1/STX4	3
BP	GO:0048284	organelle fusion	4/39	124/18670	0.000127359	0.00780944	0.00583171	SNCA/STX4/TMEM175/STX1B	4
BP	GO:1903307	positive regulation of regulated secretory pathway	3/39	53/18670	0.000183652	0.0107716	0.00804371	ADORA2B/CRHR1/STX4	3
BP	GO:0002886	regulation of myeloid leukocyte mediated immunity	3/39	55/18670	0.000205081	0.0115273	0.008608	ADORA2B/CRHR1/STX4	3
BP	GO:0070493	thrombin-activated receptor signaling pathway	2/39	12/18670	0.000276941	0.0139027	0.0103819	DGKQ/SNCA	2
BP	GO:0048489	synaptic vesicle transport	4/39	152/18670	0.00027826	0.0139027	0.0103819	ADORA2B/SNCA/STX4/STX1B	4
BP	GO:0097480	establishment of synaptic vesicle localization	4/39	152/18670	0.00027826	0.0139027	0.0103819	ADORA2B/SNCA/STX4/STX1B	4
BP	GO:0017156	calcium ion regulated exocytosis	4/39	154/18670	0.000292473	0.0140909	0.0105224	ADORA2B/SNCA/STX4/STX1B	4
BP	GO:0031646	positive regulation of neurological system process	3/39	63/18670	0.000306861	0.0142001	0.0106039	GBA/IGSF9B/STX1B	3
BP	GO:0048278	vesicle docking	3/39	64/18670	0.000321488	0.0142001	0.0106039	NSF/STX4/STX1B	3
BP	GO:0051650	establishment of vesicle localization	5/39	290/18670	0.000326318	0.0142001	0.0106039	ADORA2B/NSF/SNCA/STX4/STX1B	5
BP	GO:1903305	regulation of regulated secretory pathway	4/39	160/18670	0.000338241	0.014259	0.0106479	ADORA2B/CRHR1/STX4/STX1B	4
BP	GO:0097479	synaptic vesicle localization	4/39	163/18670	0.000362954	0.0148001	0.011052	ADORA2B/SNCA/STX4/STX1B	4
BP	GO:0006475	internal protein amino acid acetylation	4/39	166/18670	0.000388935	0.0148001	0.011052	MAPT/SNCA/KAT8/KANSL1	4
BP	GO:0036465	synaptic vesicle recycling	3/39	69/18670	0.000401378	0.0148001	0.011052	DGKQ/SNCA/STX1B	3
BP	GO:0007269	neurotransmitter secretion	4/39	169/18670	0.000416222	0.0148001	0.011052	ADORA2B/SNCA/STX4/STX1B	4
BP	GO:0051648	vesicle localization	5/39	306/18670	0.000417344	0.0148001	0.011052	ADORA2B/NSF/SNCA/STX4/STX1B	5
BP	GO:0099643	signal release from synapse	4/39	170/18670	0.000425614	0.0148001	0.011052	ADORA2B/SNCA/STX4/STX1B	4
BP	GO:0033008	positive regulation of mast cell activation involved in immune response	2/39	15/18670	0.000438847	0.0148001	0.011052	ADORA2B/CRHR1	2
BP	GO:0043306	positive regulation of mast cell degranulation	2/39	15/18670	0.000438847	0.0148001	0.011052	ADORA2B/CRHR1	2
BP	GO:0032418	lysosome localization	3/39	74/18670	0.000493033	0.0157136	0.0117341	ADORA2B/CRHR1/PLEKHM1	3
BP	GO:0043981	histone H4-K5 acetylation	2/39	16/18670	0.000500877	0.0157136	0.0117341	KAT8/KANSL1	2
BP	GO:0043982	histone H4-K8 acetylation	2/39	16/18670	0.000500877	0.0157136	0.0117341	KAT8/KANSL1	2
BP	GO:0016050	vesicle organization	5/39	325/18670	0.000549046	0.0168333	0.0125703	NSF/SNCA/STX4/TMEM175/STX1B	5
BP	GO:0048167	regulation of synaptic plasticity	4/39	187/18670	0.000609475	0.0181676	0.0135667	CRHR1/MAPT/SNCA/STX4	4
BP	GO:0140029	exocytic process	3/39	80/18670	0.000619505	0.0181676	0.0135667	SNCA/STX4/STX1B	3
BP	GO:0016082	synaptic vesicle priming	2/39	19/18670	0.00071093	0.0199801	0.0149202	SNCA/STX1B	2
BP	GO:0035493	SNARE complex assembly	2/39	19/18670	0.00071093	0.0199801	0.0149202	SNCA/STX4	2
BP	GO:0060291	long-term synaptic potentiation	3/39	86/18670	0.000765023	0.0208667	0.0155822	CRHR1/SNCA/STX4	3
BP	GO:0033005	positive regulation of mast cell activation	2/39	20/18670	0.000788881	0.0208667	0.0155822	ADORA2B/CRHR1	2
BP	GO:0048148	behavioral response to cocaine	2/39	20/18670	0.000788881	0.0208667	0.0155822	CRHR1/SNCA	2
BP	GO:0006473	protein acetylation	4/39	204/18670	0.000843813	0.021462	0.0160268	MAPT/SNCA/KAT8/KANSL1	4
BP	GO:0001956	positive regulation of neurotransmitter secretion	2/39	21/18670	0.000870771	0.021462	0.0160268	SNCA/STX1B	2
BP	GO:0043984	histone H4-K16 acetylation	2/39	21/18670	0.000870771	0.021462	0.0160268	KAT8/KANSL1	2
BP	GO:0006109	regulation of carbohydrate metabolic process	4/39	206/18670	0.000875027	0.021462	0.0160268	DGKQ/PHKG2/SNCA/NCOR1	4
BP	GO:1901215	negative regulation of neuron death	4/39	208/18670	0.000907049	0.0218502	0.0163166	CRHR1/GBA/SNCA/GPNMB	4
BP	GO:0031629	synaptic vesicle fusion to presynaptic active zone membrane	2/39	22/18670	0.000956586	0.0226392	0.0169059	STX4/STX1B	2
BP	GO:0099500	vesicle fusion to plasma membrane	2/39	23/18670	0.00104631	0.0243357	0.0181727	STX4/STX1B	2
BP	GO:0046928	regulation of neurotransmitter secretion	3/39	104/18670	0.00132645	0.0303285	0.0226479	ADORA2B/SNCA/STX1B	3
BP	GO:1903532	positive regulation of secretion by cell	5/39	399/18670	0.00137643	0.0309468	0.0231096	ADORA2B/CRHR1/SNCA/STX4/STX1B	5
BP	GO:0051953	negative regulation of amine transport	2/39	27/18670	0.00144396	0.0319329	0.0238459	CRHR1/SNCA	2
BP	GO:0099565	chemical synaptic transmission, postsynaptic	3/39	108/18670	0.00147854	0.0321702	0.0240232	SNCA/IGSF9B/STX1B	3
BP	GO:0050808	synapse organization	5/39	408/18670	0.0015188	0.0325215	0.0242855	MAPT/SNCA/RAB29/LZTS3/IGSF9B	5
BP	GO:0043543	protein acylation	4/39	248/18670	0.00173489	0.0365683	0.0273075	MAPT/SNCA/KAT8/KANSL1	4
BP	GO:1900371	regulation of purine nucleotide biosynthetic process	3/39	117/18670	0.00185969	0.0378009	0.0282279	ADORA2B/SNCA/NCOR1	3
BP	GO:0051047	positive regulation of secretion	5/39	428/18670	0.00187384	0.0378009	0.0282279	ADORA2B/CRHR1/SNCA/STX4/STX1B	5
BP	GO:0043304	regulation of mast cell degranulation	2/39	31/18670	0.00190289	0.0378009	0.0282279	ADORA2B/CRHR1	2
BP	GO:0030808	regulation of nucleotide biosynthetic process	3/39	118/18670	0.00190546	0.0378009	0.0282279	ADORA2B/SNCA/NCOR1	3
BP	GO:0042391	regulation of membrane potential	5/39	434/18670	0.00199136	0.0389325	0.0290729	GBA/MAPT/SNCA/IGSF9B/STX1B	5
BP	GO:0033006	regulation of mast cell activation involved in immune response	2/39	32/18670	0.00202707	0.0390646	0.0291715	ADORA2B/CRHR1	2
BP	GO:0006836	neurotransmitter transport	4/39	269/18670	0.00233178	0.0443039	0.033084	ADORA2B/SNCA/STX4/STX1B	4
BP	GO:0062012	regulation of small molecule metabolic process	5/39	459/18670	0.00254	0.0475898	0.0355378	ADORA2B/DGKQ/PHKG2/SNCA/NCOR1	5
BP	GO:0023061	signal release	5/39	462/18670	0.00261256	0.0482786	0.0360521	ADORA2B/CRHR1/SNCA/STX4/STX1B	5
BP	GO:0002705	positive regulation of leukocyte mediated immunity	3/39	133/18670	0.00267797	0.0488187	0.0364555	ADORA2B/CRHR1/STX4	3
BP	GO:0042326	negative regulation of phosphorylation	5/39	468/18670	0.00276218	0.0496824	0.0371005	DGKQ/GBA/MAPT/SNCA/NCOR1	5
BP	GO:0007190	activation of adenylate cyclase activity	2/39	38/18670	0.00285044	0.0497269	0.0371337	ADORA2B/CRHR1	2
BP	GO:0051590	positive regulation of neurotransmitter transport	2/39	38/18670	0.00285044	0.0497269	0.0371337	SNCA/STX1B	2
BP	GO:0044262	cellular carbohydrate metabolic process	4/39	286/18670	0.00290876	0.0497269	0.0371337	DGKQ/IDUA/PHKG2/SNCA	4
BP	GO:0031644	regulation of neurological system process	3/39	137/18670	0.0029121	0.0497269	0.0371337	GBA/IGSF9B/STX1B	3
BP	GO:0051588	regulation of neurotransmitter transport	3/39	139/18670	0.00303375	0.0511567	0.0382014	ADORA2B/SNCA/STX1B	3
BP	GO:0060078	regulation of postsynaptic membrane potential	3/39	140/18670	0.00309574	0.0515574	0.0385006	SNCA/IGSF9B/STX1B	3
BP	GO:0010675	regulation of cellular carbohydrate metabolic process	3/39	142/18670	0.00322204	0.0523678	0.0391058	DGKQ/PHKG2/SNCA	3
BP	GO:1900542	regulation of purine nucleotide metabolic process	3/39	142/18670	0.00322204	0.0523678	0.0391058	ADORA2B/SNCA/NCOR1	3
BP	GO:0033003	regulation of mast cell activation	2/39	42/18670	0.00347275	0.0549541	0.0410371	ADORA2B/CRHR1	2
BP	GO:0006140	regulation of nucleotide metabolic process	3/39	146/18670	0.00348405	0.0549541	0.0410371	ADORA2B/SNCA/NCOR1	3
BP	GO:0006914	autophagy	5/39	496/18670	0.00354411	0.0549541	0.0410371	GBA/MAPT/SNCA/PLEKHM1/KAT8	5
BP	GO:0061919	process utilizing autophagic mechanism	5/39	496/18670	0.00354411	0.0549541	0.0410371	GBA/MAPT/SNCA/PLEKHM1/KAT8	5
BP	GO:0010975	regulation of neuron projection development	5/39	499/18670	0.00363646	0.0551326	0.0411704	MAPT/WNT3/RAB29/LZTS3/STX1B	5
BP	GO:0031279	regulation of cyclase activity	2/39	43/18670	0.00363736	0.0551326	0.0411704	ADORA2B/CRHR1	2
BP	GO:1990778	protein localization to cell periphery	4/39	311/18670	0.00392495	0.0588306	0.0439319	NSF/STX4/RAB29/STX1B	4
BP	GO:0062013	positive regulation of small molecule metabolic process	3/39	153/18670	0.00397328	0.0589006	0.0439841	ADORA2B/PHKG2/SNCA	3
BP	GO:0010977	negative regulation of neuron projection development	3/39	155/18670	0.00412035	0.0602045	0.0449578	WNT3/RAB29/STX1B	3
BP	GO:0051339	regulation of lyase activity	2/39	46/18670	0.00415265	0.0602045	0.0449578	ADORA2B/CRHR1	2
BP	GO:0016573	histone acetylation	3/39	156/18670	0.00419512	0.0602045	0.0449578	SNCA/KAT8/KANSL1	3
BP	GO:0043303	mast cell degranulation	2/39	47/18670	0.00433152	0.0610863	0.0456163	ADORA2B/CRHR1	2
BP	GO:0043467	regulation of generation of precursor metabolites and energy	3/39	158/18670	0.00434713	0.0610863	0.0456163	PHKG2/SNCA/NCOR1	3
BP	GO:0001774	microglial cell activation	2/39	48/18670	0.00451391	0.0615077	0.045931	MAPT/SNCA	2
BP	GO:0002269	leukocyte activation involved in inflammatory response	2/39	48/18670	0.00451391	0.0615077	0.045931	MAPT/SNCA	2
BP	GO:0002279	mast cell activation involved in immune response	2/39	48/18670	0.00451391	0.0615077	0.045931	ADORA2B/CRHR1	2
BP	GO:0018393	internal peptidyl-lysine acetylation	3/39	161/18670	0.00458137	0.0618027	0.0461513	SNCA/KAT8/KANSL1	3
BP	GO:0010506	regulation of autophagy	4/39	327/18670	0.00468857	0.0621572	0.046416	GBA/MAPT/SNCA/KAT8	4
BP	GO:0002448	mast cell mediated immunity	2/39	49/18670	0.00469981	0.0621572	0.046416	ADORA2B/CRHR1	2
BP	GO:0031113	regulation of microtubule polymerization	2/39	50/18670	0.0048892	0.0640343	0.0478177	MAPT/SNCA	2
BP	GO:0018394	peptidyl-lysine acetylation	3/39	169/18670	0.00524304	0.0673605	0.0503016	SNCA/KAT8/KANSL1	3
BP	GO:0140056	organelle localization by membrane tethering	3/39	169/18670	0.00524304	0.0673605	0.0503016	NSF/STX4/STX1B	3
BP	GO:0046165	alcohol biosynthetic process	3/39	175/18670	0.00577522	0.0734979	0.0548847	DGKQ/GBA/SNCA	3
BP	GO:0042220	response to cocaine	2/39	55/18670	0.0058881	0.0741119	0.0553432	CRHR1/SNCA	2
BP	GO:0010950	positive regulation of endopeptidase activity	3/39	178/18670	0.00605305	0.0741119	0.0553432	EFNA3/MAPT/SNCA	3
BP	GO:0022406	membrane docking	3/39	178/18670	0.00605305	0.0741119	0.0553432	NSF/STX4/STX1B	3
BP	GO:0048488	synaptic vesicle endocytosis	2/39	56/18670	0.00609817	0.0741119	0.0553432	DGKQ/SNCA	2
BP	GO:0140238	presynaptic endocytosis	2/39	56/18670	0.00609817	0.0741119	0.0553432	DGKQ/SNCA	2
BP	GO:0001505	regulation of neurotransmitter levels	4/39	354/18670	0.00619455	0.0746111	0.055716	ADORA2B/SNCA/STX4/STX1B	4
BP	GO:0061900	glial cell activation	2/39	58/18670	0.00652846	0.0779371	0.0581997	MAPT/SNCA	2
BP	GO:0032890	regulation of organic acid transport	2/39	59/18670	0.00674867	0.0793054	0.0592214	SNCA/NCOR1	2
BP	GO:0045862	positive regulation of proteolysis	4/39	363/18670	0.00676065	0.0793054	0.0592214	EFNA3/GBA/MAPT/SNCA	4
BP	GO:0019933	cAMP-mediated signaling	3/39	187/18670	0.0069342	0.0803891	0.0600307	ADORA2B/CRHR1/DGKQ	3
BP	GO:0045576	mast cell activation	2/39	60/18670	0.00697222	0.0803891	0.0600307	ADORA2B/CRHR1	2
BP	GO:0031345	negative regulation of cell projection organization	3/39	188/18670	0.00703656	0.0804434	0.0600712	WNT3/RAB29/STX1B	3
BP	GO:0007040	lysosome organization	2/39	61/18670	0.00719911	0.08093	0.0604347	GBA/TMEM175	2
BP	GO:0080171	lytic vacuole organization	2/39	61/18670	0.00719911	0.08093	0.0604347	GBA/TMEM175	2
BP	GO:0010676	positive regulation of cellular carbohydrate metabolic process	2/39	62/18670	0.00742933	0.0817628	0.0610565	PHKG2/SNCA	2
BP	GO:0050433	regulation of catecholamine secretion	2/39	62/18670	0.00742933	0.0817628	0.0610565	CRHR1/SNCA	2
BP	GO:0043112	receptor metabolic process	3/39	192/18670	0.00745502	0.0817628	0.0610565	NSF/SNCA/RAB29	3
BP	GO:0035418	protein localization to synapse	2/39	63/18670	0.00766285	0.0833644	0.0622525	MAPT/STX1B	2
BP	GO:0050432	catecholamine secretion	2/39	64/18670	0.00789967	0.0852532	0.063663	CRHR1/SNCA	2
BP	GO:0010952	positive regulation of peptidase activity	3/39	197/18670	0.00799852	0.085635	0.0639481	EFNA3/MAPT/SNCA	3
BP	GO:0007626	locomotory behavior	3/39	198/18670	0.00810996	0.0861444	0.0643285	CRHR1/SNCA/NCOR1	3
BP	GO:0002703	regulation of leukocyte mediated immunity	3/39	201/18670	0.0084498	0.0890529	0.0665004	ADORA2B/CRHR1/STX4	3
BP	GO:0043967	histone H4 acetylation	2/39	67/18670	0.00862975	0.0902445	0.0673902	KAT8/KANSL1	2
BP	GO:0018205	peptidyl-lysine modification	4/39	397/18670	0.00920823	0.0955531	0.0713545	SNCA/SETD1A/KAT8/KANSL1	4
CC	GO:0034399	nuclear periphery	5/40	131/19717	6.5469e-06	0.00108679	0.000661582	ERCC8/DGKQ/MAPT/PRR14/KAT8	5
CC	GO:0008021	synaptic vesicle	4/40	191/19717	0.000593697	0.0279546	0.0170174	SNCA/STX4/TMEM163/STX1B	4
CC	GO:0035097	histone methyltransferase complex	3/40	86/19717	0.000704426	0.0279546	0.0170174	SETD1A/KAT8/KANSL1	3
CC	GO:0070382	exocytic vesicle	4/40	207/19717	0.000802164	0.0279546	0.0170174	SNCA/STX4/TMEM163/STX1B	4
CC	GO:0005802	trans-Golgi network	4/40	236/19717	0.00130397	0.0279546	0.0170174	CRHR1/GBA/STX4/RAB29	4
CC	GO:0016363	nuclear matrix	3/40	109/19717	0.00139919	0.0279546	0.0170174	ERCC8/DGKQ/KAT8	3
CC	GO:0034708	methyltransferase complex	3/40	113/19717	0.00155178	0.0279546	0.0170174	SETD1A/KAT8/KANSL1	3
CC	GO:0044665	MLL1/2 complex	2/40	29/19717	0.00157376	0.0279546	0.0170174	KAT8/KANSL1	2
CC	GO:0071339	MLL1 complex	2/40	29/19717	0.00157376	0.0279546	0.0170174	KAT8/KANSL1	2
CC	GO:0048787	presynaptic active zone membrane	2/40	30/19717	0.00168401	0.0279546	0.0170174	STX4/STX1B	2
CC	GO:0098793	presynapse	5/40	491/19717	0.00300886	0.0407656	0.0248161	DGKQ/SNCA/STX4/TMEM163/STX1B	5
CC	GO:0043025	neuronal cell body	5/40	497/19717	0.0031698	0.0407656	0.0248161	ERCC8/CRHR1/MAPT/SNCA/IGSF9B	5
CC	GO:1990391	DNA repair complex	2/40	42/19717	0.00328235	0.0407656	0.0248161	ERCC8/ZSWIM7	2
CC	GO:1902562	H4 histone acetyltransferase complex	2/40	43/19717	0.00343807	0.0407656	0.0248161	KAT8/KANSL1	2
CC	GO:0031201	SNARE complex	2/40	47/19717	0.00409478	0.0453155	0.0275859	STX4/STX1B	2
CC	GO:0005765	lysosomal membrane	4/40	354/19717	0.00560947	0.0553188	0.0336754	GBA/NSF/PLEKHM1/TMEM175	4
CC	GO:0098852	lytic vacuole membrane	4/40	355/19717	0.00566518	0.0553188	0.0336754	GBA/NSF/PLEKHM1/TMEM175	4
CC	GO:0030133	transport vesicle	4/40	392/19717	0.00799575	0.0737385	0.0448884	SNCA/STX4/TMEM163/STX1B	4
CC	GO:0048786	presynaptic active zone	2/40	71/19717	0.00912901	0.0787285	0.0479261	STX4/STX1B	2
CC	GO:0005774	vacuolar membrane	4/40	412/19717	0.00948536	0.0787285	0.0479261	GBA/NSF/PLEKHM1/TMEM175	4
CC	GO:0097060	synaptic membrane	4/40	432/19717	0.0111462	0.0881084	0.0536361	STX4/LZTS3/IGSF9B/STX1B	4
CC	GO:0016234	inclusion body	2/40	82/19717	0.0120304	0.0907749	0.0552593	MAPT/SNCA	2
CC	GO:0000123	histone acetyltransferase complex	2/40	85/19717	0.0128831	0.0929826	0.0566032	KAT8/KANSL1	2
CC	GO:0031091	platelet alpha granule	2/40	91/19717	0.0146654	0.0943196	0.0574172	SNCA/MMRN1	2
CC	GO:0010008	endosome membrane	4/40	479/19717	0.0157628	0.0943196	0.0574172	PLEKHM1/GPNMB/TMEM163/TMEM175	4
CC	GO:0031248	protein acetyltransferase complex	2/40	95/19717	0.0159093	0.0943196	0.0574172	KAT8/KANSL1	2
CC	GO:0043202	lysosomal lumen	2/40	95/19717	0.0159093	0.0943196	0.0574172	GBA/IDUA	2
CC	GO:1902493	acetyltransferase complex	2/40	95/19717	0.0159093	0.0943196	0.0574172	KAT8/KANSL1	2
CC	GO:0030672	synaptic vesicle membrane	2/40	104/19717	0.0188672	0.09697	0.0590305	SNCA/TMEM163	2
CC	GO:0099501	exocytic vesicle membrane	2/40	104/19717	0.0188672	0.09697	0.0590305	SNCA/TMEM163	2
CC	GO:0042470	melanosome	2/40	106/19717	0.0195537	0.09697	0.0590305	RAB29/GPNMB	2
CC	GO:0048770	pigment granule	2/40	106/19717	0.0195537	0.09697	0.0590305	RAB29/GPNMB	2
CC	GO:0033655	host cell cytoplasm part	1/40	10/19717	0.0201074	0.09697	0.0590305	RAB29	1
CC	GO:0005652	nuclear lamina	1/40	11/19717	0.0220963	0.09697	0.0590305	PRR14	1
CC	GO:0030430	host cell cytoplasm	1/40	11/19717	0.0220963	0.09697	0.0590305	RAB29	1
CC	GO:0032280	symmetric synapse	1/40	11/19717	0.0220963	0.09697	0.0590305	IGSF9B	1
CC	GO:0000109	nucleotide-excision repair complex	1/40	12/19717	0.0240813	0.09697	0.0590305	ERCC8	1
CC	GO:0031464	Cul4A-RING E3 ubiquitin ligase complex	1/40	12/19717	0.0240813	0.09697	0.0590305	ERCC8	1
CC	GO:0048188	Set1C/COMPASS complex	1/40	12/19717	0.0240813	0.09697	0.0590305	SETD1A	1
CC	GO:1990909	Wnt signalosome	1/40	12/19717	0.0240813	0.09697	0.0590305	WNT3	1
CC	GO:0016580	Sin3 complex	1/40	13/19717	0.0260624	0.09697	0.0590305	NCOR1	1
CC	GO:0014069	postsynaptic density	3/40	324/19717	0.0277564	0.09697	0.0590305	NSF/LZTS3/IGSF9B	3
CC	GO:0030673	axolemma	1/40	14/19717	0.0280395	0.09697	0.0590305	MAPT	1
CC	GO:0033162	melanosome membrane	1/40	14/19717	0.0280395	0.09697	0.0590305	GPNMB	1
CC	GO:0033646	host intracellular part	1/40	14/19717	0.0280395	0.09697	0.0590305	RAB29	1
CC	GO:0043656	intracellular region of host	1/40	14/19717	0.0280395	0.09697	0.0590305	RAB29	1
CC	GO:0045009	chitosome	1/40	14/19717	0.0280395	0.09697	0.0590305	GPNMB	1
CC	GO:0090741	pigment granule membrane	1/40	14/19717	0.0280395	0.09697	0.0590305	GPNMB	1
CC	GO:0032279	asymmetric synapse	3/40	328/19717	0.0286418	0.0970315	0.059068	NSF/LZTS3/IGSF9B	3
CC	GO:0000776	kinetochore	2/40	135/19717	0.0306352	0.09716	0.0591462	KAT8/KANSL1	2
CC	GO:0033643	host cell part	1/40	16/19717	0.031982	0.09716	0.0591462	RAB29	1
CC	GO:0070822	Sin3-type complex	1/40	16/19717	0.031982	0.09716	0.0591462	NCOR1	1
CC	GO:0099572	postsynaptic specialization	3/40	348/19717	0.0332937	0.09716	0.0591462	NSF/LZTS3/IGSF9B	3
CC	GO:0098978	glutamatergic synapse	3/40	349/19717	0.0335361	0.09716	0.0591462	ADORA2B/DGKQ/STX4	3
CC	GO:0005769	early endosome	3/40	350/19717	0.0337794	0.09716	0.0591462	RAB29/GPNMB/TMEM163	3
CC	GO:0098984	neuron to neuron synapse	3/40	350/19717	0.0337794	0.09716	0.0591462	NSF/LZTS3/IGSF9B	3
CC	GO:0031092	platelet alpha granule membrane	1/40	17/19717	0.0339475	0.09716	0.0591462	SNCA	1
CC	GO:0060077	inhibitory synapse	1/40	17/19717	0.0339475	0.09716	0.0591462	IGSF9B	1
MF	GO:0000149	SNARE binding	4/37	110/17697	7.9677e-05	0.00800177	0.00637949	NSF/SNCA/STX4/STX1B	4
MF	GO:0043995	histone acetyltransferase activity (H4-K5 specific)	2/37	10/17697	0.000189391	0.00800177	0.00637949	KAT8/KANSL1	2
MF	GO:0043996	histone acetyltransferase activity (H4-K8 specific)	2/37	10/17697	0.000189391	0.00800177	0.00637949	KAT8/KANSL1	2
MF	GO:0046972	histone acetyltransferase activity (H4-K16 specific)	2/37	10/17697	0.000189391	0.00800177	0.00637949	KAT8/KANSL1	2
MF	GO:0043274	phospholipase binding	2/37	16/17697	0.000501065	0.016936	0.0135024	DGKQ/SNCA	2
MF	GO:0010485	H4 histone acetyltransferase activity	2/37	21/17697	0.00087111	0.0210311	0.0167672	KAT8/KANSL1	2
MF	GO:0070840	dynein complex binding	2/37	21/17697	0.00087111	0.0210311	0.0167672	SNCA/RAB29	2
MF	GO:0005484	SNAP receptor activity	2/37	31/17697	0.00190367	0.0402151	0.0320619	STX4/STX1B	2
MF	GO:0019894	kinesin binding	2/37	42/17697	0.00347429	0.0652394	0.0520127	SNCA/RAB29	2
