# Supplementary material for: Joint analysis of proteome, transcriptome, and multi-trait analysis to identify novel Parkinson’s disease risk genes
Source: Aging (Albany NY). 2024 Jan 17;16(2):1555–80. doi: 10.18632/aging.205444 (PMC10866412; doi:10.18632/aging.205444)
Supplement: Supplementary Table 23 [file aging-16-205444-s022.xlsx]

## Sheet: Sheet1
Supplementary Table 23. Pathway analysis of the whole blood tissue S-PrediXcan results.
ONTOLOGY	ID	Description	GeneRatio	GeneRatio	BgRatio	p-value	p.adjust	q-value	geneID	Count
BP	GO:0070493	thrombin-activated receptor signaling pathway	2/19	44611	12/18670	6.44e-05	0.0416533	0.0299119	DGKQ/SNCA	2
BP	GO:0001921	positive regulation of receptor recycling	2/19	44611	15/18670	0.000102217	0.0416533	0.0299119	SNCA/RAB29	2
BP	GO:0001919	regulation of receptor recycling	2/19	44611	24/18670	0.00026722	0.0544462	0.0390986	SNCA/RAB29	2
BP	GO:1903421	regulation of synaptic vesicle recycling	2/19	44611	24/18670	0.00026722	0.0544462	0.0390986	DGKQ/SNCA	2
BP	GO:0010675	regulation of cellular carbohydrate metabolic process	3/19	44639	142/18670	0.00038175	0.0622252	0.0446848	SCARB2/DGKQ/SNCA	3
BP	GO:0001881	receptor recycling	2/19	44611	35/18670	0.000572241	0.0777295	0.0558186	SNCA/RAB29	2
CC	GO:0035097	histone methyltransferase complex	2/19	44611	86/19717	0.00306413	0.0791256	0.0578795	SETD1A/KAT8	2
CC	GO:0042470	melanosome	2/19	44611	106/19717	0.00461218	0.0791256	0.0578795	RAB29/GPNMB	2
CC	GO:0048770	pigment granule	2/19	44611	106/19717	0.00461218	0.0791256	0.0578795	RAB29/GPNMB	2
CC	GO:0016363	nuclear matrix	2/19	44611	109/19717	0.00486984	0.0791256	0.0578795	DGKQ/KAT8	2
CC	GO:0034708	methyltransferase complex	2/19	44611	113/19717	0.00522355	0.0791256	0.0578795	SETD1A/KAT8	2
CC	GO:0034399	nuclear periphery	2/19	44611	131/19717	0.00695677	0.0791256	0.0578795	DGKQ/KAT8	2
CC	GO:0033655	host cell cytoplasm part	1/19	44580	10/19717	0.00959686	0.0791256	0.0578795	RAB29	1
CC	GO:0010008	endosome membrane	3/19	44639	479/19717	0.0103354	0.0791256	0.0578795	SCARB2/PLEKHM1/GPNMB	3
CC	GO:0030430	host cell cytoplasm	1/19	44580	11/19717	0.0105517	0.0791256	0.0578795	RAB29	1
CC	GO:0032280	symmetric synapse	1/19	44580	11/19717	0.0105517	0.0791256	0.0578795	IGSF9B	1
CC	GO:0030666	endocytic vesicle membrane	2/19	44611	167/19717	0.0110936	0.0791256	0.0578795	SCARB2/WNT3	2
CC	GO:0048188	Set1C/COMPASS complex	1/19	44580	12/19717	0.0115057	0.0791256	0.0578795	SETD1A	1
CC	GO:1990909	Wnt signalosome	1/19	44580	12/19717	0.0115057	0.0791256	0.0578795	WNT3	1
CC	GO:0001931	uropod	1/19	44580	13/19717	0.0124589	0.0791256	0.0578795	BST1	1
CC	GO:0031254	cell trailing edge	1/19	44580	13/19717	0.0124589	0.0791256	0.0578795	BST1	1
CC	GO:0033162	melanosome membrane	1/19	44580	14/19717	0.0134111	0.0791256	0.0578795	GPNMB	1
CC	GO:0033646	host intracellular part	1/19	44580	14/19717	0.0134111	0.0791256	0.0578795	RAB29	1
CC	GO:0043656	intracellular region of host	1/19	44580	14/19717	0.0134111	0.0791256	0.0578795	RAB29	1
CC	GO:0045009	chitosome	1/19	44580	14/19717	0.0134111	0.0791256	0.0578795	GPNMB	1
CC	GO:0090741	pigment granule membrane	1/19	44580	14/19717	0.0134111	0.0791256	0.0578795	GPNMB	1
CC	GO:0033643	host cell part	1/19	44580	16/19717	0.015313	0.0834346	0.0610315	RAB29	1
CC	GO:0031092	platelet alpha granule membrane	1/19	44580	17/19717	0.0162627	0.0834346	0.0610315	SNCA	1
CC	GO:0060077	inhibitory synapse	1/19	44580	17/19717	0.0162627	0.0834346	0.0610315	IGSF9B	1
MF	GO:0043274	phospholipase binding	2/19	44611	16/17697	0.000129879	0.0133671	0.0100164	DGKQ/SNCA	2
MF	GO:0070840	dynein complex binding	2/19	44611	21/17697	0.000226561	0.0133671	0.0100164	SNCA/RAB29	2
MF	GO:0019894	kinesin binding	2/19	44611	42/17697	0.000916501	0.036049	0.0270127	SNCA/RAB29	2
