# Supplementary material for: Joint analysis of proteome, transcriptome, and multi-trait analysis to identify novel Parkinson’s disease risk genes
Source: Aging (Albany NY). 2024 Jan 17;16(2):1555–80. doi: 10.18632/aging.205444 (PMC10866412; doi:10.18632/aging.205444)
Supplement: Supplementary Table 24 [file aging-16-205444-s023.xlsx]

## Sheet: Sheet1
Supplementary Table 24. Comparison of TWAS results from PD MTAG and PD GWAS.
			PD MTAG			PD GWAS
gene	gene_name	tissue	zscore	effect_size	p-value	zscore	effect_size	p-value
ENSG00000232748	AC135050.1	Brain_Amygdala	6.35355	7.90236	2.10405e-10	4.90781	0.951919	9.21005e-07
ENSG00000260911	AC135050.3	Brain_Amygdala	-5.30063	-0.0494009	1.15406e-07	-4.96779	-0.230754	6.7721e-07
ENSG00000228696	ARL17B	Brain_Amygdala	-9.21111	-4.13771	3.22764e-20
ENSG00000196118	CCDC189	Brain_Amygdala	5.4452	0.096639	5.17462e-08	4.75874	0.736516	1.94801e-06
ENSG00000004468	CD38	Brain_Amygdala	-7.46541	-0.0587021	8.30407e-14	-7.54728	-0.50019	4.44432e-14
ENSG00000169242	EFNA1	Brain_Amygdala	4.55807	0.216987	5.16256e-06
ENSG00000099377	HSD3B7	Brain_Amygdala	-5.98346	-0.239236	2.18442e-09
ENSG00000120071	KANSL1	Brain_Amygdala	-6.91867	-0.0818433	4.55892e-12
ENSG00000214401	KANSL1-AS1	Brain_Amygdala	-9.29406	-0.0343133	1.48517e-20
ENSG00000103510	KAT8	Brain_Amygdala	-4.92285	-0.0291641	8.52911e-07
ENSG00000230658	KLHL7-DT	Brain_Amygdala	-4.98062	-0.0127615	6.338e-07	-5.09301	-0.0868544	3.5243e-07
ENSG00000264589	MAPT-AS1	Brain_Amygdala	5.46953	0.0605847	4.51242e-08	6.31301	0.664146	2.73663e-10
ENSG00000138722	MMRN1	Brain_Amygdala	9.65025	0.0877334	4.90379e-22	8.30485	0.242047	9.9943e-17
ENSG00000141027	NCOR1	Brain_Amygdala	5.6452	0.0685481	1.64988e-08	5.23906	0.485759	1.61395e-07
ENSG00000136243	NUPL2	Brain_Amygdala	5.07269	0.0240081	3.92232e-07	5.29904	0.176343	1.16412e-07
ENSG00000225190	PLEKHM1	Brain_Amygdala	-8.24043	-0.0655769	1.71597e-16	-8.00563	-0.951804	1.18855e-15
ENSG00000178226	PRSS36	Brain_Amygdala	-5.09288	-0.0182199	3.52656e-07	-4.54834	-0.142578	5.40695e-06
ENSG00000151006	PRSS53	Brain_Amygdala	5.05221	0.226379	4.36736e-07	5.01707	0.555205	5.24663e-07
ENSG00000117280	RAB29	Brain_Amygdala	6.42436	0.0276492	1.32427e-10	6.20889	0.227455	5.33585e-10
ENSG00000103549	RNF40	Brain_Amygdala	-4.96162	-0.196745	6.99091e-07	-5.40702	-0.493168	6.40831e-08
ENSG00000145335	SNCA	Brain_Amygdala	-5.55445	-0.0951275	2.78494e-08	-6.1033	-0.972037	1.03899e-09
ENSG00000103496	STX4	Brain_Amygdala	5.67874	0.110746	1.3569e-08	5.47568	0.746705	4.35827e-08
ENSG00000127419	TMEM175	Brain_Amygdala	-6.85462	-0.0638827	7.15038e-12	-6.18151	-0.494739	6.34903e-10
ENSG00000011295	TTC19	Brain_Amygdala	-5.287	-0.0475378	1.24337e-07	-5.15601	-0.394874	2.5227e-07
ENSG00000214941	ZSWIM7	Brain_Amygdala	5.2253	0.0308902	1.73875e-07	5.03888	0.165763	4.68259e-07
ENSG00000275413	AC002553.2	Brain_Anterior_cingulate_cortex_BA24	-5.2744	-0.79257	1.3319e-07	-5.07432	-1.66223	3.88885e-07
ENSG00000274678	AC106886.3	Brain_Anterior_cingulate_cortex_BA24	-5.74882	-0.265196	8.98662e-09	-5.50797	-1.73824	3.62988e-08
ENSG00000232748	AC135050.1	Brain_Anterior_cingulate_cortex_BA24	4.96934	0.214799	6.71812e-07	5.38297	0.528225	7.32683e-08
ENSG00000260911	AC135050.3	Brain_Anterior_cingulate_cortex_BA24	-5.53929	-0.0967292	3.03704e-08	-5.0743	-0.216313	3.88917e-07
ENSG00000170425	ADORA2B	Brain_Anterior_cingulate_cortex_BA24	5.25761	0.036389	1.45938e-07	5.11901	0.239017	3.07146e-07
ENSG00000228696	ARL17B	Brain_Anterior_cingulate_cortex_BA24	-9.21111	-0.225895	3.22764e-20
ENSG00000196118	CCDC189	Brain_Anterior_cingulate_cortex_BA24	6.08189	0.0427632	1.18774e-09	5.58754	0.361788	2.30307e-08
ENSG00000004468	CD38	Brain_Anterior_cingulate_cortex_BA24	-7.40565	-0.0459645	1.30505e-13	-7.12334	-0.359992	1.05341e-12
ENSG00000145214	DGKQ	Brain_Anterior_cingulate_cortex_BA24	5.87899	0.173791	4.12776e-09
ENSG00000169242	EFNA1	Brain_Anterior_cingulate_cortex_BA24	4.80229	0.0405155	1.56861e-06
ENSG00000178950	GAK	Brain_Anterior_cingulate_cortex_BA24	6.34454	0.268764	2.23092e-10	5.76905	2.11223	7.97189e-09
ENSG00000127415	IDUA	Brain_Anterior_cingulate_cortex_BA24	-7.93729	-0.214343	2.0664e-15	-7.12106	-1.70625	1.07099e-12
ENSG00000214401	KANSL1-AS1	Brain_Anterior_cingulate_cortex_BA24	-9.41989	-0.0676195	4.51556e-21	-8.36877	-0.355742	5.82251e-17
ENSG00000103510	KAT8	Brain_Anterior_cingulate_cortex_BA24	-4.64901	-0.0218871	3.33531e-06	-5.34095	-0.143908	9.24607e-08
ENSG00000230658	KLHL7-DT	Brain_Anterior_cingulate_cortex_BA24	-5.26554	-0.013226	1.39776e-07	-5.23457	-0.0986445	1.65366e-07
ENSG00000176681	LRRC37A	Brain_Anterior_cingulate_cortex_BA24	-9.21111	-0.0341893	3.22764e-20	-7.37366	-0.322224	1.66012e-13
ENSG00000138722	MMRN1	Brain_Anterior_cingulate_cortex_BA24	7.29503	0.0221093	2.98595e-13	7.94051	0.194188	2.01344e-15
ENSG00000069275	NUCKS1	Brain_Anterior_cingulate_cortex_BA24	-4.63697	-0.0358041	3.53556e-06
ENSG00000136243	NUPL2	Brain_Anterior_cingulate_cortex_BA24	5.1538	0.0220437	2.55265e-07	5.42868	0.140521	5.67734e-08
ENSG00000225190	PLEKHM1	Brain_Anterior_cingulate_cortex_BA24	-8.29181	-0.0966036	1.11539e-16	-8.1244	-1.00915	4.49594e-16
ENSG00000156858	PRR14	Brain_Anterior_cingulate_cortex_BA24	5.72864	0.207852	1.01239e-08	5.04056	1.0632	4.64162e-07
ENSG00000117280	RAB29	Brain_Anterior_cingulate_cortex_BA24	7.0186	0.0481682	2.2411e-12	6.97325	0.351652	3.09698e-12
ENSG00000107295	SH3GL2	Brain_Anterior_cingulate_cortex_BA24	4.66724	0.0624055	3.05277e-06	4.69487	0.457846	2.66771e-06
ENSG00000103496	STX4	Brain_Anterior_cingulate_cortex_BA24	5.67874	0.118627	1.3569e-08	5.47705	0.797628	4.32463e-08
ENSG00000011295	TTC19	Brain_Anterior_cingulate_cortex_BA24	-5.33794	-0.0285927	9.4007e-08	-5.24014	-0.227977	1.60457e-07
ENSG00000214941	ZSWIM7	Brain_Anterior_cingulate_cortex_BA24	5.54997	0.0352617	2.85725e-08	5.22989	0.159157	1.69613e-07
ENSG00000275413	AC002553.2	Brain_Caudate_basal_ganglia	-5.51058	-0.286956	3.57657e-08	-5.24986	-0.714125	1.52212e-07
ENSG00000275263	AC135048.3	Brain_Caudate_basal_ganglia	6.20579	0.138011	5.44232e-10
ENSG00000170425	ADORA2B	Brain_Caudate_basal_ganglia	5.71849	0.0813932	1.07476e-08	5.50726	0.47913	3.64459e-08
ENSG00000159314	ARHGAP27	Brain_Caudate_basal_ganglia	-9.27668	-0.0724383	1.74837e-20	-9.079	-0.681592	1.09574e-19
ENSG00000185829	ARL17A	Brain_Caudate_basal_ganglia	-7.66263	-0.0447355	1.82158e-14	-5.60966	-0.330023	2.02728e-08
ENSG00000196118	CCDC189	Brain_Caudate_basal_ganglia	6.05341	0.0415869	1.41815e-09	5.59642	0.358543	2.18823e-08
ENSG00000004468	CD38	Brain_Caudate_basal_ganglia	-7.59397	-0.0404053	3.1024e-14	-7.72107	-0.346563	1.15356e-14
ENSG00000120088	CRHR1	Brain_Caudate_basal_ganglia	5.92926	0.0334255	3.0431e-09	5.85225	0.349287	4.8496e-09
ENSG00000169242	EFNA1	Brain_Caudate_basal_ganglia	4.55807	0.0522997	5.16256e-06
ENSG00000099377	HSD3B7	Brain_Caudate_basal_ganglia	-5.97924	-0.253398	2.24182e-09
ENSG00000120071	KANSL1	Brain_Caudate_basal_ganglia	-7.11124	-0.0642565	1.15006e-12
ENSG00000214401	KANSL1-AS1	Brain_Caudate_basal_ganglia	-9.21929	-0.0305414	2.99086e-20	-8.90291	-0.223592	5.44019e-19
ENSG00000103510	KAT8	Brain_Caudate_basal_ganglia	-4.95022	-0.0257769	7.41288e-07	-5.61422	-0.144012
ENSG00000122550	KLHL7	Brain_Caudate_basal_ganglia	-4.71279	-0.0530611	2.44351e-06	-4.66807	-0.481655
ENSG00000230658	KLHL7-DT	Brain_Caudate_basal_ganglia	-5.11225	-0.0115036	3.18339e-07	-5.0847	-0.0866656
ENSG00000176681	LRRC37A	Brain_Caudate_basal_ganglia	-9.21111	-0.0368226	3.22764e-20	-7.46988	-0.352732
ENSG00000264589	MAPT-AS1	Brain_Caudate_basal_ganglia	6.92386	0.0235175	4.39502e-12	6.97175	0.235271
ENSG00000279685	MAPT-IT1	Brain_Caudate_basal_ganglia	-9.3881	-0.105766	6.10943e-21	-8.40807	-0.830627	4.16824e-17
ENSG00000138722	MMRN1	Brain_Caudate_basal_ganglia	7.93953	0.027589	2.02942e-15	8.46701	0.225059	2.51762e-17
ENSG00000141027	NCOR1	Brain_Caudate_basal_ganglia	5.4892	0.0545513	4.03759e-08	5.15106	0.425984	2.59016e-07
ENSG00000073969	NSF	Brain_Caudate_basal_ganglia	-4.60715	-0.279805	4.08222e-06
ENSG00000136243	NUPL2	Brain_Caudate_basal_ganglia	5.25171	0.034265	1.50697e-07	5.59416	0.163563	2.21697e-08
ENSG00000225190	PLEKHM1	Brain_Caudate_basal_ganglia	-8.2467	-0.0645493	1.62827e-16	-8.20136	-0.594114	2.37678e-16
ENSG00000178226	PRSS36	Brain_Caudate_basal_ganglia	-4.83465	-0.0161461	1.33377e-06
ENSG00000117280	RAB29	Brain_Caudate_basal_ganglia	6.37283	0.021404	1.85572e-10	6.16979	0.177758	6.83807e-10
ENSG00000103549	RNF40	Brain_Caudate_basal_ganglia	-5.03993	-0.0277953	4.65697e-07
ENSG00000145335	SNCA	Brain_Caudate_basal_ganglia	-7.74805	-0.16407	9.33109e-15	-7.12775	-1.41993	1.02025e-12
ENSG00000198648	STK39	Brain_Caudate_basal_ganglia	-5.25088	-0.0829991	1.5137e-07	-5.30511	-0.724854	1.12606e-07
ENSG00000103496	STX4	Brain_Caudate_basal_ganglia	5.77414	0.0732012	7.73461e-09	5.45117	0.552257	5.0039e-08
ENSG00000127419	TMEM175	Brain_Caudate_basal_ganglia	-4.97152	-0.0347233	6.64306e-07
ENSG00000011295	TTC19	Brain_Caudate_basal_ganglia	-4.81659	-0.0284786	1.46029e-06	-5.15291	-0.202026	2.56469e-07
ENSG00000167395	ZNF646	Brain_Caudate_basal_ganglia	-5.67874	-0.362945	1.3569e-08	-5.37351	-0.438345	7.72191e-08
ENSG00000214941	ZSWIM7	Brain_Caudate_basal_ganglia	5.28485	0.0338114	1.25805e-07	5.06764	0.130371	4.02788e-07
ENSG00000227782	AC002553.1	Brain_Cerebellar_Hemisphere	5.12064	0.0811389	3.04497e-07	4.94672	0.675857	7.5473e-07
ENSG00000267121	AC008105.3	Brain_Cerebellar_Hemisphere	6.78417	0.160395	1.16754e-11	8.3798	0.904667	5.30179e-17
ENSG00000236234	AC091132.2	Brain_Cerebellar_Hemisphere	9.6208	0.162369	6.53183e-22	9.35633	1.77019	8.25572e-21
ENSG00000275263	AC135048.3	Brain_Cerebellar_Hemisphere	6.66813	0.0497648	2.59078e-11
ENSG00000260911	AC135050.3	Brain_Cerebellar_Hemisphere	-5.48927	-0.0921422	4.03588e-08	-5.04327	-0.204204	4.57646e-07
ENSG00000260262	AC139887.3	Brain_Cerebellar_Hemisphere	4.98109	0.114443	6.32285e-07	5.52107	1.14765	3.36933e-08
ENSG00000170425	ADORA2B	Brain_Cerebellar_Hemisphere	5.3354	0.0344645	9.53362e-08	5.10039	0.154072	3.38946e-07
ENSG00000159314	ARHGAP27	Brain_Cerebellar_Hemisphere	-7.52588	-0.0266933	5.23665e-14	-7.59266	-0.366571	3.13409e-14
ENSG00000185829	ARL17A	Brain_Cerebellar_Hemisphere	-7.36713	-0.0238857	1.74344e-13	-7.26796	-0.23108	3.64964e-13
ENSG00000228696	ARL17B	Brain_Cerebellar_Hemisphere	-9.21111	-0.115456	3.22764e-20
ENSG00000196118	CCDC189	Brain_Cerebellar_Hemisphere	5.50288	0.0584002	3.7363e-08	4.68622	0.31782	2.78303e-06
ENSG00000130783	CCDC62	Brain_Cerebellar_Hemisphere	6.09214	0.0858489	1.11408e-09	5.60391	0.628081	2.09572e-08
ENSG00000145214	DGKQ	Brain_Cerebellar_Hemisphere	-10.0853	-0.0658061	6.41871e-24
ENSG00000169242	EFNA1	Brain_Cerebellar_Hemisphere	4.97076	0.0518604	6.66913e-07
ENSG00000237765	FAM200B	Brain_Cerebellar_Hemisphere	5.56279	0.0214453	2.65489e-08	5.99319	0.156593	2.05764e-09
ENSG00000232300	FAM215B	Brain_Cerebellar_Hemisphere	-6.1498	-0.0778947	7.75832e-10	-7.65078	-0.622561	1.9977e-14
ENSG00000184922	FMNL1	Brain_Cerebellar_Hemisphere	8.35048	0.0427399	6.79855e-17	8.16876	0.441579	3.11584e-16
ENSG00000178950	GAK	Brain_Cerebellar_Hemisphere	6.86507	0.0298382	6.64591e-12	6.18652	0.234347	6.15083e-10
ENSG00000099377	HSD3B7	Brain_Cerebellar_Hemisphere	-6.32259	-0.31811	2.57218e-10
ENSG00000080854	IGSF9B	Brain_Cerebellar_Hemisphere	-5.1257	-0.0650476	2.96432e-07	-5.2119	-0.463468	1.86921e-07
ENSG00000120071	KANSL1	Brain_Cerebellar_Hemisphere	-5.67162	-0.0321765	1.41453e-08
ENSG00000214401	KANSL1-AS1	Brain_Cerebellar_Hemisphere	-9.36814	-0.0693099	7.38199e-21	-7.88814	-0.372639	3.06714e-15
ENSG00000103510	KAT8	Brain_Cerebellar_Hemisphere	-5.01985	-0.051227	5.17106e-07	-5.57037	-0.128486	2.54198e-08
ENSG00000230658	KLHL7-DT	Brain_Cerebellar_Hemisphere	-5.14444	-0.0119098	2.6832e-07	-5.1117	-0.089641	3.19272e-07
ENSG00000238083	LRRC37A2	Brain_Cerebellar_Hemisphere	-9.20387	-0.0287618	3.4527e-20	-7.96239	-0.279741	1.68746e-15
ENSG00000186868	MAPT	Brain_Cerebellar_Hemisphere	8.01965	0.0868237	1.06047e-15	7.64834	0.934009	2.03595e-14
ENSG00000264589	MAPT-AS1	Brain_Cerebellar_Hemisphere	7.84368	0.0470101	4.37518e-15	7.34372	0.396916	2.0774e-13
ENSG00000279685	MAPT-IT1	Brain_Cerebellar_Hemisphere	-9.57898	-0.173494	9.80056e-22	-9.25816	-1.90032	2.0799e-20
ENSG00000138722	MMRN1	Brain_Cerebellar_Hemisphere	8.03367	0.112497	9.45997e-16	7.91084	0.277939	2.55648e-15
ENSG00000136448	NMT1	Brain_Cerebellar_Hemisphere	5.74292	0.0297091	9.30574e-09	5.04912	0.226145	4.43854e-07
ENSG00000073969	NSF	Brain_Cerebellar_Hemisphere	4.62165	0.0924264	3.80697e-06	4.67534	0.851081	2.93473e-06
ENSG00000178226	PRSS36	Brain_Cerebellar_Hemisphere	-4.79977	-0.0158937	1.58852e-06
ENSG00000117280	RAB29	Brain_Cerebellar_Hemisphere	6.23579	0.02217	4.49508e-10	6.04005	0.183897	1.5407e-09
ENSG00000138760	SCARB2	Brain_Cerebellar_Hemisphere	5.2438	0.0737091	1.57303e-07	4.79258	0.57254	1.6465e-06
ENSG00000099381	SETD1A	Brain_Cerebellar_Hemisphere	-5.63297	-0.768965	1.77135e-08	-5.77821	-1.41065	7.55004e-09
ENSG00000145217	SLC26A1	Brain_Cerebellar_Hemisphere	4.94344	0.0132031	7.67558e-07	4.86993	0.106741	1.11638e-06
ENSG00000247775	SNCA-AS1	Brain_Cerebellar_Hemisphere	-4.66232	-0.0131728	3.12664e-06
ENSG00000185294	SPPL2C	Brain_Cerebellar_Hemisphere	-9.73266	-0.0449228	2.18799e-22	-9.48729	-0.453513	2.3712e-21
ENSG00000099365	STX1B	Brain_Cerebellar_Hemisphere	-5.66812	-0.0622555	1.44373e-08
ENSG00000103496	STX4	Brain_Cerebellar_Hemisphere	-5.67874	-0.72337	1.3569e-08
ENSG00000127419	TMEM175	Brain_Cerebellar_Hemisphere	-6.88221	-0.0574463	5.89326e-12	-6.2165	-0.445919	5.08378e-10
ENSG00000011295	TTC19	Brain_Cerebellar_Hemisphere	-5.44317	-0.0533322	5.23401e-08	-5.35531	-0.273573	8.54116e-08
ENSG00000167395	ZNF646	Brain_Cerebellar_Hemisphere	-5.67874	-0.365403	1.3569e-08	-5.28244	-0.457986	1.27476e-07
ENSG00000167394	ZNF668	Brain_Cerebellar_Hemisphere	5.30922	0.531628	1.10093e-07	5.46942	3.55114	4.515e-08
ENSG00000214941	ZSWIM7	Brain_Cerebellar_Hemisphere	-5.45793	-0.0253961	4.81717e-08	-5.14198	-0.230743	2.71856e-07
ENSG00000227782	AC002553.1	Brain_Cerebellum	5.08874	0.032947	3.60445e-07	4.86012	0.271897	1.17314e-06
ENSG00000267121	AC008105.3	Brain_Cerebellum	4.62151	0.283689	3.80965e-06	8.94489	1.01325	3.72332e-19
ENSG00000260911	AC135050.3	Brain_Cerebellum	-5.45708	-0.0898047	4.84029e-08	-5.04739	-0.204455	4.47889e-07
ENSG00000170425	ADORA2B	Brain_Cerebellum	5.30049	0.0333858	1.15494e-07	5.08942	0.150503	3.59168e-07
ENSG00000159314	ARHGAP27	Brain_Cerebellum	-7.60585	-0.0247568	2.83034e-14	-7.47334	-0.301641	7.81825e-14
ENSG00000185829	ARL17A	Brain_Cerebellum	-7.35483	-0.0357254	1.9117e-13	-5.81898	-0.278345	5.92089e-09
ENSG00000196118	CCDC189	Brain_Cerebellum	6.13588	0.0481316	8.46894e-10	5.53174	0.38252	3.17072e-08
ENSG00000130783	CCDC62	Brain_Cerebellum	5.84782	0.112823	4.98045e-09	5.13811	0.743613	2.77518e-07
ENSG00000262372	CR936218.1	Brain_Cerebellum	5.3161	0.0620299	1.06013e-07	4.95526	0.535066	7.22324e-07
ENSG00000145214	DGKQ	Brain_Cerebellum	-9.87033	-0.0444746	5.59815e-23	-4.90531	-0.151438	9.3282e-07
ENSG00000169242	EFNA1	Brain_Cerebellum	4.8808	0.0675709	1.05657e-06
ENSG00000160767	FAM189B	Brain_Cerebellum	5.64095	0.158175	1.69116e-08
ENSG00000184922	FMNL1	Brain_Cerebellum	9.18142	0.0450566	4.25448e-20
ENSG00000178950	GAK	Brain_Cerebellum	6.99474	0.0365589	2.65748e-12	6.13887	0.274811	8.31102e-10
ENSG00000127415	IDUA	Brain_Cerebellum	-5.47619	-0.0278856	4.34584e-08
ENSG00000080854	IGSF9B	Brain_Cerebellum	-4.96611	-0.0546321	6.83077e-07	-5.08314	-0.378081	3.71244e-07
ENSG00000120071	KANSL1	Brain_Cerebellum	-5.48278	-0.0291793	4.18691e-08
ENSG00000214401	KANSL1-AS1	Brain_Cerebellum	-9.3689	-0.0690925	7.32908e-21	-7.95414	-0.367916	1.80379e-15
ENSG00000103510	KAT8	Brain_Cerebellum	-4.76327	-0.0255152	1.90481e-06	-5.53182	-0.14021	3.16921e-08
ENSG00000230658	KLHL7-DT	Brain_Cerebellum	-5.13989	-0.0121915	2.74897e-07	-5.10524	-0.0916883	3.30375e-07
ENSG00000176681	LRRC37A	Brain_Cerebellum	-9.21111	-0.0379689	3.22764e-20	-8.73892	-0.389115	2.35352e-18
ENSG00000238083	LRRC37A2	Brain_Cerebellum	-9.24088	-0.0286702	2.44489e-20	-7.90683	-0.277391	2.64019e-15
ENSG00000186868	MAPT	Brain_Cerebellum	6.65343	0.0784141	2.86333e-11	6.26483	0.810427	3.73225e-10
ENSG00000264589	MAPT-AS1	Brain_Cerebellum	8.45764	0.0576339	2.72854e-17	7.86249	0.552295	3.76577e-15
ENSG00000279685	MAPT-IT1	Brain_Cerebellum	-9.91353	-0.184325	3.6356e-23	-9.29004	-1.7149	1.54229e-20
ENSG00000138722	MMRN1	Brain_Cerebellum	7.08519	0.0292787	1.38849e-12	6.89104	0.221574	5.53873e-12
ENSG00000073969	NSF	Brain_Cerebellum	7.02467	0.36914	2.14578e-12	6.86926	3.57783	6.45357e-12
ENSG00000225190	PLEKHM1	Brain_Cerebellum	8.26266	0.0735669	1.4246e-16	9.48863	0.309513	2.34088e-21
ENSG00000178226	PRSS36	Brain_Cerebellum	-4.79664	-0.0158797	1.61352e-06
ENSG00000117280	RAB29	Brain_Cerebellum	6.26416	0.0218834	3.74849e-10	6.06552	0.18157	1.31527e-09
ENSG00000103549	RNF40	Brain_Cerebellum	-4.98583	-0.0266759	6.16961e-07
ENSG00000138760	SCARB2	Brain_Cerebellum	5.91432	0.0427684	3.33247e-09	6.14092	0.381523	8.20454e-10
ENSG00000099381	SETD1A	Brain_Cerebellum	-5.35177	-0.410826	8.70981e-08	-5.67138	-0.372751	1.41652e-08
ENSG00000185294	SPPL2C	Brain_Cerebellum	-9.69634	-0.0280959	3.12495e-22	-9.29626	-0.289716	1.45477e-20
ENSG00000127419	TMEM175	Brain_Cerebellum	-7.23114	-0.0291364	4.78973e-13	-6.57057	-0.228164	5.01223e-11
ENSG00000167395	ZNF646	Brain_Cerebellum	-5.67874	-0.351794	1.3569e-08	-5.28715	-0.453443	1.24235e-07
ENSG00000214941	ZSWIM7	Brain_Cerebellum	-5.48888	-0.0224155	4.04487e-08	-5.17381	-0.20421	2.29364e-07
ENSG00000275413	AC002553.2	Brain_Cortex	-5.51846	-0.357359	3.41983e-08	-5.19346	-0.753575	2.06416e-07
ENSG00000274678	AC106886.3	Brain_Cortex	-6.0952	-0.10553	1.09304e-09	-5.51869	-0.684435	3.41538e-08
ENSG00000232748	AC135050.1	Brain_Cortex	5.83736	0.308347	5.30331e-09	5.39695	0.588995	6.77847e-08
ENSG00000260911	AC135050.3	Brain_Cortex	-5.22717	-0.0766864	1.72128e-07	-4.97452	-0.19357	6.54081e-07
ENSG00000278133	AC135050.6	Brain_Cortex	4.85746	0.189358	1.18899e-06	4.60569	0.738165	4.11107e-06
ENSG00000170425	ADORA2B	Brain_Cortex	5.31514	0.0341629	1.06577e-07	5.09402	0.152452	3.50546e-07
ENSG00000159314	ARHGAP27	Brain_Cortex	-8.19366	-0.0639989	2.53399e-16	-7.95812	-0.691954	1.74679e-15
ENSG00000185829	ARL17A	Brain_Cortex	-7.79048	-0.0408503	6.67565e-15	-6.41301	-0.332222	1.4267e-10
ENSG00000228696	ARL17B	Brain_Cortex	-9.21111	-0.18523	3.22764e-20
ENSG00000099385	BCL7C	Brain_Cortex	-5.80492	-0.177702	6.43965e-09	-5.26431	-1.33467	1.40716e-07
ENSG00000196118	CCDC189	Brain_Cortex	6.03389	0.0405747	1.60055e-09	5.59544	0.353127	2.20065e-08
ENSG00000004468	CD38	Brain_Cortex	-7.72087	-0.0423511	1.15537e-14	-7.66135	-0.339315	1.83992e-14
ENSG00000120088	CRHR1	Brain_Cortex	-6.63393	-0.119503	3.26873e-11	-6.807	-1.20142	9.96566e-12
ENSG00000145214	DGKQ	Brain_Cortex	6.23884	0.102299	4.40819e-10
ENSG00000169242	EFNA1	Brain_Cortex	4.99693	0.0542275	5.82496e-07
ENSG00000143590	EFNA3	Brain_Cortex	-5.01448	-0.127602	5.31783e-07
ENSG00000179344	HLA-DQB1	Brain_Cortex	-4.81207	-0.0691986	1.49376e-06
ENSG00000099377	HSD3B7	Brain_Cortex	-6.42524	-0.0570157	1.31664e-10	-5.85403	-0.440644	4.79805e-09
ENSG00000127415	IDUA	Brain_Cortex	-7.08349	-0.0857568	1.40565e-12	-6.35902	-0.676271	2.03048e-10
ENSG00000080854	IGSF9B	Brain_Cortex	-5.02349	-0.120685	5.0742e-07	-5.20356	-0.591903	1.95508e-07
ENSG00000120071	KANSL1	Brain_Cortex	-7.03647	-0.0631794	1.97166e-12
ENSG00000214401	KANSL1-AS1	Brain_Cortex	-9.18747	-0.0258994	4.022e-20	-8.85795	-0.220034	8.14993e-19
ENSG00000103510	KAT8	Brain_Cortex	-4.96562	-0.02569	6.8483e-07	-5.6127	-0.142656	1.99196e-08
ENSG00000230658	KLHL7-DT	Brain_Cortex	-5.10291	-0.0115254	3.34469e-07	-5.07831	-0.086665	3.80809e-07
ENSG00000176681	LRRC37A	Brain_Cortex	-8.54054	-0.0595849	1.33592e-17	-5.74801	-0.412894	9.03026e-09
ENSG00000238083	LRRC37A2	Brain_Cortex	-8.29812	-0.029625	1.05775e-16	-7.72891	-0.230008	1.08472e-14
ENSG00000243368	MCCC1-AS1	Brain_Cortex	-4.98708	-0.0677479	6.12988e-07	-5.42487	-0.555518	5.79974e-08
ENSG00000260083	MIR762HG	Brain_Cortex	-4.97249	-0.195423	6.60992e-07	-4.57552	-1.57335	4.75031e-06
ENSG00000138722	MMRN1	Brain_Cortex	8.45076	0.0388969	2.89405e-17	8.70768	0.248453	3.10167e-18
ENSG00000164182	NDUFAF2	Brain_Cortex	5.86795	0.0694183	4.41223e-09	5.7133	0.629841	1.10806e-08
ENSG00000136243	NUPL2	Brain_Cortex	5.24638	0.0187116	1.55118e-07	5.52663	0.122573	3.26449e-08
ENSG00000225190	PLEKHM1	Brain_Cortex	-8.27037	-0.0697437	1.33546e-16	-8.16508	-0.895538	3.21222e-16
ENSG00000117280	RAB29	Brain_Cortex	6.86472	0.0370417	6.66204e-12	6.76731	0.291794	1.31199e-11
ENSG00000138760	SCARB2	Brain_Cortex	5.81069	0.100653	6.22143e-09	5.31795	0.781723	1.04944e-07
ENSG00000185294	SPPL2C	Brain_Cortex	-7.15757	-0.0915443	8.21224e-13	-6.92043	-0.923923	4.50281e-12
ENSG00000103496	STX4	Brain_Cortex	5.77709	0.11107	7.60052e-09	5.45015	0.841916	5.03276e-08
ENSG00000152128	TMEM163	Brain_Cortex	5.50711	0.539834	3.6478e-08
ENSG00000127419	TMEM175	Brain_Cortex	-5.37265	-0.0249354	7.75879e-08	-4.94559	-0.195566	7.59134e-07
ENSG00000011295	TTC19	Brain_Cortex	-5.46895	-0.0472566	4.52719e-08	-5.39963	-0.259655	6.67781e-08
ENSG00000167394	ZNF668	Brain_Cortex	5.20995	1.2137	1.88895e-07	4.86964	9.94687	1.118e-06
ENSG00000214941	ZSWIM7	Brain_Cortex	5.51672	0.0276409	3.45381e-08	5.20234	0.114079	1.96791e-07
ENSG00000232748	AC135050.1	Brain_Frontal_Cortex_BA9	5.20995	5.59116	1.88895e-07	4.86711	0.616854	1.13244e-06
ENSG00000260911	AC135050.3	Brain_Frontal_Cortex_BA9	-5.5821	-0.030647	2.37634e-08	-4.98289	-0.238238	6.26415e-07
ENSG00000170425	ADORA2B	Brain_Frontal_Cortex_BA9	5.32867	0.0553436	9.89358e-08	5.08138	0.213249	3.74698e-07
ENSG00000159314	ARHGAP27	Brain_Frontal_Cortex_BA9	-5.35729	-0.0290286	8.44815e-08	-5.69525	-0.329152	1.23189e-08
ENSG00000185829	ARL17A	Brain_Frontal_Cortex_BA9	-7.84883	-0.0410355	4.19921e-15	-6.53135	-0.338024	6.51795e-11
ENSG00000228696	ARL17B	Brain_Frontal_Cortex_BA9	-9.21111	-0.191564	3.22764e-20
ENSG00000196118	CCDC189	Brain_Frontal_Cortex_BA9	5.90272	0.0269945	3.57553e-09	5.36587	0.299402	8.05592e-08
ENSG00000004468	CD38	Brain_Frontal_Cortex_BA9	-7.63252	-0.0466623	2.30203e-14	-7.57289	-0.379423	3.65005e-14
ENSG00000145214	DGKQ	Brain_Frontal_Cortex_BA9	5.61729	0.117719	1.93973e-08
ENSG00000169242	EFNA1	Brain_Frontal_Cortex_BA9	4.55807	0.0399388	5.16256e-06
ENSG00000099377	HSD3B7	Brain_Frontal_Cortex_BA9	-6.31819	-0.31358	2.64639e-10
ENSG00000127415	IDUA	Brain_Frontal_Cortex_BA9	-7.86032	-0.22053	3.83154e-15
ENSG00000120071	KANSL1	Brain_Frontal_Cortex_BA9	-7.47741	-0.0766638	7.58006e-14
ENSG00000214401	KANSL1-AS1	Brain_Frontal_Cortex_BA9	-9.09249	-0.0254843	9.67995e-20	-8.71599	-0.198488	2.8824e-18
ENSG00000103510	KAT8	Brain_Frontal_Cortex_BA9	-4.94157	-0.0250381	7.74963e-07	-5.62283	-0.142439	1.87858e-08
ENSG00000230658	KLHL7-DT	Brain_Frontal_Cortex_BA9	-5.10011	-0.0115729	3.39458e-07	-5.0833	-0.0866994	3.70924e-07
ENSG00000176681	LRRC37A	Brain_Frontal_Cortex_BA9	-7.09166	-0.0619184	1.32508e-12
ENSG00000238083	LRRC37A2	Brain_Frontal_Cortex_BA9	-8.55724	-0.0316882	1.15602e-17	-8.02705	-0.251088	9.98448e-16
ENSG00000243368	MCCC1-AS1	Brain_Frontal_Cortex_BA9	-4.89624	-0.0641079	9.76854e-07	-5.35973	-0.52585	8.33474e-08
ENSG00000138722	MMRN1	Brain_Frontal_Cortex_BA9	8.62637	0.0374023	6.3331e-18	8.71686	0.243396	2.86034e-18
ENSG00000136243	NUPL2	Brain_Frontal_Cortex_BA9	5.23927	0.0201071	1.61214e-07	5.55967	0.109065	2.70291e-08
ENSG00000225190	PLEKHM1	Brain_Frontal_Cortex_BA9	-8.28453	-0.0685396	1.18575e-16	-8.21073	-0.945084	2.19841e-16
ENSG00000117280	RAB29	Brain_Frontal_Cortex_BA9	6.67013	0.0513207	2.5558e-11	6.76601	0.349081	1.32385e-11
ENSG00000138760	SCARB2	Brain_Frontal_Cortex_BA9	5.25154	0.0450204	1.50833e-07	5.95586	0.422664	2.58706e-09
ENSG00000107295	SH3GL2	Brain_Frontal_Cortex_BA9	4.60659	0.0283616	4.09327e-06
ENSG00000185294	SPPL2C	Brain_Frontal_Cortex_BA9	-6.60989	-0.0508445	3.84602e-11	-6.27356	-0.439994	3.52881e-10
ENSG00000103496	STX4	Brain_Frontal_Cortex_BA9	5.72556	0.120093	1.03096e-08	5.47436	0.83396	4.39095e-08
ENSG00000127419	TMEM175	Brain_Frontal_Cortex_BA9	-5.38226	-0.0262747	7.35581e-08	-4.92623	-0.205989	8.38331e-07
ENSG00000167394	ZNF668	Brain_Frontal_Cortex_BA9	5.20995	0.917832	1.88895e-07	4.88146	7.51669	1.05306e-06
ENSG00000214941	ZSWIM7	Brain_Frontal_Cortex_BA9	5.52778	0.0360733	3.24309e-08	5.24059	0.161525	1.60063e-07
ENSG00000260911	AC135050.3	Brain_Hippocampus	-5.31467	-0.0421233	1.06848e-07	-5.01427	-0.205584	5.32353e-07
ENSG00000278133	AC135050.6	Brain_Hippocampus	4.85746	0.178829	1.18899e-06	4.60506	0.677927	4.12353e-06
ENSG00000170425	ADORA2B	Brain_Hippocampus	5.0127	0.0342688	5.3671e-07	4.99931	0.233247	5.75365e-07
ENSG00000228696	ARL17B	Brain_Hippocampus	-9.21111	-0.220204	3.22764e-20
ENSG00000196118	CCDC189	Brain_Hippocampus	6.13683	0.0468458	8.41829e-10	5.55126	0.377187	2.83622e-08
ENSG00000120088	CRHR1	Brain_Hippocampus	6.96059	0.0788422	3.38861e-12	6.67723	0.836263	2.43501e-11
ENSG00000169242	EFNA1	Brain_Hippocampus	4.55807	0.0719638	5.16256e-06
ENSG00000237765	FAM200B	Brain_Hippocampus	4.66795	0.0170341	3.04225e-06
ENSG00000127415	IDUA	Brain_Hippocampus	-7.55777	-0.24425	4.10053e-14	-6.76981	-1.94955	1.28949e-11
ENSG00000080854	IGSF9B	Brain_Hippocampus	-5.16685	-0.166799	2.38067e-07	-4.9557	-1.37587	7.20693e-07
ENSG00000120071	KANSL1	Brain_Hippocampus	-5.57536	-0.0321499	2.47015e-08
ENSG00000214401	KANSL1-AS1	Brain_Hippocampus	-9.14267	-0.0276801	6.09278e-20	-8.78635	-0.218071	1.54496e-18
ENSG00000103510	KAT8	Brain_Hippocampus	-4.94186	-0.025129	7.73804e-07	-5.61885	-0.142721	1.92229e-08
ENSG00000230658	KLHL7-DT	Brain_Hippocampus	-5.10041	-0.0114953	3.3892e-07	-5.07143	-0.0865586	3.9483e-07
ENSG00000176681	LRRC37A	Brain_Hippocampus	-8.63039	-0.0711093	6.11452e-18	-5.97805	-0.503918	2.25825e-09
ENSG00000238083	LRRC37A2	Brain_Hippocampus	-9.06269	-0.0299221	1.27275e-19	-8.70092	-0.268888	3.29197e-18
ENSG00000264589	MAPT-AS1	Brain_Hippocampus	7.39023	0.0480319	1.46574e-13	7.03202	0.526432	2.03562e-12
ENSG00000279685	MAPT-IT1	Brain_Hippocampus	-9.58045	-0.11603	9.66197e-22	-8.4935	-0.904831	2.00504e-17
ENSG00000138722	MMRN1	Brain_Hippocampus	8.86724	0.0856245	7.49782e-19	7.92871	0.233161	2.21425e-15
ENSG00000141027	NCOR1	Brain_Hippocampus	5.60409	0.0628443	2.09358e-08	5.19718	0.459751	2.02336e-07
ENSG00000164182	NDUFAF2	Brain_Hippocampus	5.83826	0.0672604	5.2749e-09	5.68632	0.617028	1.29808e-08
ENSG00000136243	NUPL2	Brain_Hippocampus	5.19541	0.027547	2.0427e-07	5.5044	0.151882	3.70418e-08
ENSG00000225190	PLEKHM1	Brain_Hippocampus	-8.46004	-0.0879054	2.67293e-17	-8.26672	-0.917877	1.37696e-16
ENSG00000178226	PRSS36	Brain_Hippocampus	-4.91529	-0.0169612	8.86502e-07
ENSG00000117280	RAB29	Brain_Hippocampus	6.14179	0.0362194	8.15961e-10	6.19614	0.277439	5.7866e-10
ENSG00000103549	RNF40	Brain_Hippocampus	-5.01632	-0.0334746	5.26718e-07	-4.55939	-0.206785	5.13026e-06
ENSG00000103496	STX4	Brain_Hippocampus	5.67874	0.197885	1.3569e-08	5.30707	1.6199	1.11401e-07
ENSG00000127419	TMEM175	Brain_Hippocampus	-6.8002	-0.118396	1.04475e-11	-6.12283	-0.91489	9.19306e-10
ENSG00000011295	TTC19	Brain_Hippocampus	-5.77367	-0.0458177	7.75616e-09	-5.60406	-0.283558	2.09388e-08
ENSG00000167395	ZNF646	Brain_Hippocampus	-5.67874	-0.362809	1.3569e-08	-5.30944	-0.454722	1.0996e-07
ENSG00000214941	ZSWIM7	Brain_Hippocampus	5.59395	0.0324022	2.21955e-08	5.23822	0.149777	1.62135e-07
ENSG00000267198	AC091132.4	Brain_Hypothalamus	4.879	0.208877	1.06627e-06
ENSG00000275263	AC135048.3	Brain_Hypothalamus	6.11044	0.0979504	9.93576e-10
ENSG00000232748	AC135050.1	Brain_Hypothalamus	5.17638	0.044656	2.26231e-07	5.07799	0.326021	3.81451e-07
ENSG00000260911	AC135050.3	Brain_Hypothalamus	-5.54523	-0.0979911	2.9356e-08	-5.04294	-0.205978	4.58429e-07
ENSG00000170425	ADORA2B	Brain_Hypothalamus	5.03508	0.0284146	4.7764e-07
ENSG00000185829	ARL17A	Brain_Hypothalamus	-7.29622	-0.042276	2.95974e-13
ENSG00000228696	ARL17B	Brain_Hypothalamus	-9.21111	-0.176556	3.22764e-20
ENSG00000196118	CCDC189	Brain_Hypothalamus	6.05394	0.0259188	1.41349e-09	5.51544	0.216423	3.47903e-08
ENSG00000004468	CD38	Brain_Hypothalamus	-7.72386	-0.0463047	1.12862e-14	-8.00219	-0.400104	1.22229e-15
ENSG00000099377	HSD3B7	Brain_Hypothalamus	-5.97622	-0.257831	2.28373e-09
ENSG00000120071	KANSL1	Brain_Hypothalamus	-7.19717	-0.0740522	6.14763e-13
ENSG00000214401	KANSL1-AS1	Brain_Hypothalamus	-9.27076	-0.0294972	1.84826e-20	-9.05217	-0.225561	1.40152e-19
ENSG00000103510	KAT8	Brain_Hypothalamus	-4.95844	-0.0259389	7.1061e-07	-5.60859	-0.144385	2.03985e-08
ENSG00000230658	KLHL7-DT	Brain_Hypothalamus	-5.11425	-0.0116064	3.14985e-07	-5.08148	-0.087637	3.7451e-07
ENSG00000176681	LRRC37A	Brain_Hypothalamus	-8.83391	-0.0551819	1.01079e-18	-6.27108	-0.40065	3.58561e-10
ENSG00000238083	LRRC37A2	Brain_Hypothalamus	-9.16	-0.0281395	5.18953e-20	-8.67661	-0.260027	4.0775e-18
ENSG00000264589	MAPT-AS1	Brain_Hypothalamus	7.63456	0.0424975	2.26587e-14	7.32062	0.461084	2.46828e-13
ENSG00000279685	MAPT-IT1	Brain_Hypothalamus	-9.44287	-0.108455	3.62695e-21	-8.43306	-0.850081	3.36733e-17
ENSG00000138722	MMRN1	Brain_Hypothalamus	9.13166	0.0746475	6.74539e-20	8.16046	0.241831	3.33754e-16
ENSG00000141027	NCOR1	Brain_Hypothalamus	5.50594	0.111657	3.67198e-08	5.30628	0.780463	1.11885e-07
ENSG00000136243	NUPL2	Brain_Hypothalamus	5.08338	0.0276787	3.70783e-07	5.51147	0.144197	3.55847e-08
ENSG00000225190	PLEKHM1	Brain_Hypothalamus	-8.02947	-0.0732515	9.78975e-16	-7.63016	-1.02856	2.34458e-14
ENSG00000178226	PRSS36	Brain_Hypothalamus	-4.87158	-0.0165546	1.1071e-06
ENSG00000117280	RAB29	Brain_Hypothalamus	6.22558	0.022593	4.79786e-10	6.03197	0.187172	1.61969e-09
ENSG00000138760	SCARB2	Brain_Hypothalamus	6.73876	0.0737604	1.59742e-11	6.45119	0.588331	1.10975e-10
ENSG00000103496	STX4	Brain_Hypothalamus	5.79138	0.120638	6.9811e-09	5.55101	0.898805	2.84025e-08
ENSG00000127419	TMEM175	Brain_Hypothalamus	-6.81608	-0.0561762	9.35597e-12	-5.95421	-0.408021	2.61336e-09
ENSG00000011295	TTC19	Brain_Hypothalamus	-5.4622	-0.0471655	4.70259e-08	-5.40645	-0.257085	6.42844e-08
ENSG00000214941	ZSWIM7	Brain_Hypothalamus	5.74661	0.0562835	9.10509e-09	5.4208	0.291336	5.93337e-08
ENSG00000227782	AC002553.1	Brain_Nucleus_accumbens_basal_ganglia	5.66721	0.137497	1.4514e-08	5.40736	1.12572	6.39603e-08
ENSG00000226816	AC005082.1	Brain_Nucleus_accumbens_basal_ganglia	-5.07022	-0.0414592	3.97356e-07	-5.54079	-0.236981	3.01114e-08
ENSG00000260911	AC135050.3	Brain_Nucleus_accumbens_basal_ganglia	-5.54976	-0.0954207	2.86062e-08	-5.06539	-0.211119	4.07558e-07
ENSG00000278133	AC135050.6	Brain_Nucleus_accumbens_basal_ganglia	4.89222	0.0619124	9.97052e-07
ENSG00000170425	ADORA2B	Brain_Nucleus_accumbens_basal_ganglia	5.32995	0.0354361	9.82404e-08	5.09447	0.156084	3.49723e-07
ENSG00000159314	ARHGAP27	Brain_Nucleus_accumbens_basal_ganglia	-9.72327	-0.0583078	2.39938e-22	-9.60666	-0.605709	7.49412e-22
ENSG00000185829	ARL17A	Brain_Nucleus_accumbens_basal_ganglia	-8.15546	-0.0375882	3.47847e-16	-7.78761	-0.350309	6.82866e-15
ENSG00000228696	ARL17B	Brain_Nucleus_accumbens_basal_ganglia	-9.21111	-0.181467	3.22764e-20
ENSG00000099385	BCL7C	Brain_Nucleus_accumbens_basal_ganglia	-5.66631	-0.170252	1.45905e-08	-5.12932	-1.26838	2.90795e-07
ENSG00000196118	CCDC189	Brain_Nucleus_accumbens_basal_ganglia	5.91574	0.0276627	3.30392e-09	5.38585	0.302402	7.21025e-08
ENSG00000004468	CD38	Brain_Nucleus_accumbens_basal_ganglia	-7.2415	-0.0296317	4.43746e-13	-7.4789	-0.250473	7.49483e-14
ENSG00000262372	CR936218.1	Brain_Nucleus_accumbens_basal_ganglia	9.25629	1.40051	2.11666e-20	6.68067	6.53567	2.37847e-11
ENSG00000120088	CRHR1	Brain_Nucleus_accumbens_basal_ganglia	5.90564	0.0351593	3.51274e-09	5.09625	0.308105	3.46449e-07
ENSG00000169242	EFNA1	Brain_Nucleus_accumbens_basal_ganglia	5.08818	0.0271913	3.61516e-07	5.16032	0.253992	2.46522e-07
ENSG00000049167	ERCC8	Brain_Nucleus_accumbens_basal_ganglia	-5.068	-0.0287558	4.02015e-07
ENSG00000237765	FAM200B	Brain_Nucleus_accumbens_basal_ganglia	4.99353	0.0170369	5.92869e-07
ENSG00000178950	GAK	Brain_Nucleus_accumbens_basal_ganglia	4.81027	0.165289	1.50727e-06
ENSG00000120071	KANSL1	Brain_Nucleus_accumbens_basal_ganglia	-7.17771	-0.0723142	7.08873e-13
ENSG00000214401	KANSL1-AS1	Brain_Nucleus_accumbens_basal_ganglia	-9.40187	-0.0637236	5.36019e-21	-8.55644	-0.340929	1.16407e-17
ENSG00000103510	KAT8	Brain_Nucleus_accumbens_basal_ganglia	-4.9357	-0.0249245	7.98648e-07	-5.62219	-0.142255	1.88555e-08
ENSG00000122550	KLHL7	Brain_Nucleus_accumbens_basal_ganglia	-4.62043	-0.0505041	3.82947e-06
ENSG00000230658	KLHL7-DT	Brain_Nucleus_accumbens_basal_ganglia	-5.11305	-0.0116343	3.17e-07	-5.08116	-0.0876194	3.75143e-07
ENSG00000176681	LRRC37A	Brain_Nucleus_accumbens_basal_ganglia	-8.78391	-0.0640615	1.57888e-18	-6.3056	-0.469983	2.8708e-10
ENSG00000264589	MAPT-AS1	Brain_Nucleus_accumbens_basal_ganglia	8.13925	0.0411396	3.97737e-16	8.18407	0.384415	2.74411e-16
ENSG00000279685	MAPT-IT1	Brain_Nucleus_accumbens_basal_ganglia	-9.65197	-0.118315	4.82194e-22	-8.54479	-0.926405	1.2877e-17
ENSG00000243368	MCCC1-AS1	Brain_Nucleus_accumbens_basal_ganglia	-4.89138	-0.06369	1.00133e-06	-5.35269	-0.522778	8.66575e-08
ENSG00000138722	MMRN1	Brain_Nucleus_accumbens_basal_ganglia	9.00361	0.0395692	2.18406e-19	8.67149	0.238871	4.26506e-18
ENSG00000141027	NCOR1	Brain_Nucleus_accumbens_basal_ganglia	5.18971	0.57943	2.10624e-07	5.039	4.92953	4.67959e-07
ENSG00000164182	NDUFAF2	Brain_Nucleus_accumbens_basal_ganglia	5.94575	0.0677355	2.75187e-09	5.79165	0.619524	6.96975e-09
ENSG00000175938	ORAI3	Brain_Nucleus_accumbens_basal_ganglia	5.88242	0.0248289	4.04304e-09
ENSG00000225190	PLEKHM1	Brain_Nucleus_accumbens_basal_ganglia	-4.92682	-0.0545306	8.35772e-07	-7.3332	-0.417552	2.24725e-13
ENSG00000178226	PRSS36	Brain_Nucleus_accumbens_basal_ganglia	-4.743	-0.015658	2.10581e-06
ENSG00000117280	RAB29	Brain_Nucleus_accumbens_basal_ganglia	6.70483	0.0297089	2.01646e-11	6.52415	0.2411	6.83904e-11
ENSG00000103549	RNF40	Brain_Nucleus_accumbens_basal_ganglia	-6.03075	-0.103657	1.63199e-09	-5.66674	-0.296018	1.45538e-08
ENSG00000138760	SCARB2	Brain_Nucleus_accumbens_basal_ganglia	5.3687	0.0705935	7.93075e-08
ENSG00000080603	SRCAP	Brain_Nucleus_accumbens_basal_ganglia	-5.67114	-0.148471	1.41849e-08	-5.13818	-1.17544	2.77405e-07
ENSG00000198648	STK39	Brain_Nucleus_accumbens_basal_ganglia	-5.1071	-0.0660209	3.27144e-07	-5.20101	-0.586956	1.98208e-07
ENSG00000103496	STX4	Brain_Nucleus_accumbens_basal_ganglia	5.7754	0.0684509	7.67716e-09	5.44639	0.521551	5.14037e-08
ENSG00000127419	TMEM175	Brain_Nucleus_accumbens_basal_ganglia	-6.61791	-0.0447385	3.64314e-11	-5.57837	-0.300511	2.42786e-08
ENSG00000011295	TTC19	Brain_Nucleus_accumbens_basal_ganglia	-4.67294	-0.0271433	2.96918e-06	-5.10563	-0.194836	3.29693e-07
ENSG00000214941	ZSWIM7	Brain_Nucleus_accumbens_basal_ganglia	5.28485	0.0503441	1.25805e-07	5.05686	0.12946	4.26207e-07
ENSG00000227782	AC002553.1	Brain_Putamen_basal_ganglia	5.62689	0.0906526	1.83491e-08	5.39893	0.757462	6.70412e-08
ENSG00000260911	AC135050.3	Brain_Putamen_basal_ganglia	-5.37485	-0.0465541	7.66471e-08
ENSG00000170425	ADORA2B	Brain_Putamen_basal_ganglia	5.30787	0.0340544	1.10914e-07	5.09134	0.151743	3.55539e-07
ENSG00000159314	ARHGAP27	Brain_Putamen_basal_ganglia	-8.08944	-0.0614305	5.99386e-16	-7.81501	-0.539649	5.49607e-15
ENSG00000185829	ARL17A	Brain_Putamen_basal_ganglia	-7.75271	-0.0352208	8.99553e-15	-7.18762	-0.31673	6.59324e-13
ENSG00000196118	CCDC189	Brain_Putamen_basal_ganglia	6.0836	0.0429922	1.1751e-09	5.59143	0.364108	2.25209e-08
ENSG00000004468	CD38	Brain_Putamen_basal_ganglia	-7.5476	-0.0414831	4.43365e-14	-7.68745	-0.356138	1.50091e-14
ENSG00000120088	CRHR1	Brain_Putamen_basal_ganglia	7.04613	0.0566991	1.83956e-12	6.77868	0.613614	1.21281e-11
ENSG00000169242	EFNA1	Brain_Putamen_basal_ganglia	4.53576	0.021789	5.73971e-06
ENSG00000237765	FAM200B	Brain_Putamen_basal_ganglia	4.81828	0.0176018	1.44799e-06
ENSG00000130787	HIP1R	Brain_Putamen_basal_ganglia	4.74727	0.0687176	2.06176e-06
ENSG00000120071	KANSL1	Brain_Putamen_basal_ganglia	-7.49806	-0.0774577	6.47703e-14
ENSG00000214401	KANSL1-AS1	Brain_Putamen_basal_ganglia	-9.52919	-0.0616033	1.58516e-21	-8.27029	-0.346664	1.33639e-16
ENSG00000103510	KAT8	Brain_Putamen_basal_ganglia	-4.96656	-0.0261064	6.81494e-07	-5.60071	-0.145189	2.13475e-08
ENSG00000230658	KLHL7-DT	Brain_Putamen_basal_ganglia	-5.19818	-0.012658	2.01252e-07	-5.16605	-0.0948269	2.39087e-07
ENSG00000078081	LAMP3	Brain_Putamen_basal_ganglia	-5.74976	-0.0861578	8.93682e-09	-5.59108	-0.769599	2.25661e-08
ENSG00000176681	LRRC37A	Brain_Putamen_basal_ganglia	-9.21111	-0.548889	3.22764e-20
ENSG00000238083	LRRC37A2	Brain_Putamen_basal_ganglia	-9.26079	-0.0289433	2.02918e-20	-8.90419	-0.268027	5.37775e-19
ENSG00000264589	MAPT-AS1	Brain_Putamen_basal_ganglia	5.53455	0.033994	3.12025e-08	5.79977	0.371163	6.64052e-09
ENSG00000279685	MAPT-IT1	Brain_Putamen_basal_ganglia	-9.42075	-0.10745	4.47891e-21	-8.42459	-0.843183	3.62009e-17
ENSG00000243368	MCCC1-AS1	Brain_Putamen_basal_ganglia	-4.92218	-0.0648869	8.55876e-07	-5.37429	-0.532602	7.68845e-08
ENSG00000138722	MMRN1	Brain_Putamen_basal_ganglia	8.34843	0.0346969	6.91765e-17	8.49922	0.233602	1.90862e-17
ENSG00000141027	NCOR1	Brain_Putamen_basal_ganglia	5.48301	0.111533	4.18147e-08	5.30781	0.800434	1.10952e-07
ENSG00000164182	NDUFAF2	Brain_Putamen_basal_ganglia	6.00405	0.0751462	1.92454e-09	5.84878	0.686194	4.95178e-09
ENSG00000136243	NUPL2	Brain_Putamen_basal_ganglia	5.25037	0.0342956	1.51796e-07	5.5981	0.163087	2.1671e-08
ENSG00000225190	PLEKHM1	Brain_Putamen_basal_ganglia	-8.20071	-0.0698798	2.38965e-16	-7.92064	-0.952288	2.36288e-15
ENSG00000117280	RAB29	Brain_Putamen_basal_ganglia	5.26974	0.0277131	1.36613e-07
ENSG00000103549	RNF40	Brain_Putamen_basal_ganglia	-4.75282	-0.044783	2.00604e-06
ENSG00000138760	SCARB2	Brain_Putamen_basal_ganglia	6.25852	0.0631016	3.88656e-10	6.06339	0.502422	1.3328e-09
ENSG00000198648	STK39	Brain_Putamen_basal_ganglia	-5.12678	-0.0557782	2.94741e-07	-5.12949	-0.476338	2.90529e-07
ENSG00000103496	STX4	Brain_Putamen_basal_ganglia	5.84573	0.0525951	5.04354e-09	5.5151	0.294838	3.4858e-08
ENSG00000127419	TMEM175	Brain_Putamen_basal_ganglia	-5.54213	-0.0527241	2.98806e-08
ENSG00000011295	TTC19	Brain_Putamen_basal_ganglia	-5.53632	-0.0408426	3.08885e-08	-5.51855	-0.226248	3.418e-08
ENSG00000214941	ZSWIM7	Brain_Putamen_basal_ganglia	5.04034	0.0333195	4.64697e-07
ENSG00000275413	AC002553.2	Brain_Spinal_cord_cervical_c-1	-4.92641	-0.0242728	8.37559e-07
ENSG00000275263	AC135048.3	Brain_Spinal_cord_cervical_c-1	5.99496	0.554643	2.03538e-09	5.64229	4.59822	1.67799e-08
ENSG00000260911	AC135050.3	Brain_Spinal_cord_cervical_c-1	-5.33059	-0.0939997	9.78941e-08	-4.99019	-0.210933	6.03191e-07
ENSG00000278133	AC135050.6	Brain_Spinal_cord_cervical_c-1	4.85746	0.211829	1.18899e-06
ENSG00000143537	ADAM15	Brain_Spinal_cord_cervical_c-1	-4.88778	-0.0177249	1.01979e-06
ENSG00000170425	ADORA2B	Brain_Spinal_cord_cervical_c-1	5.40749	0.0394571	6.39144e-08	5.12979	0.176014	2.90069e-07
ENSG00000185829	ARL17A	Brain_Spinal_cord_cervical_c-1	-6.53889	-0.0532401	6.19762e-11
ENSG00000228696	ARL17B	Brain_Spinal_cord_cervical_c-1	-9.21111	-0.118829	3.22764e-20
ENSG00000204290	BTNL2	Brain_Spinal_cord_cervical_c-1	4.66033	0.0482236	3.15701e-06
ENSG00000163749	CCDC158	Brain_Spinal_cord_cervical_c-1	-4.68802	-0.0505441	2.75861e-06
ENSG00000120088	CRHR1	Brain_Spinal_cord_cervical_c-1	8.28805	0.205283	1.15123e-16	8.00309	2.1351	1.21332e-15
ENSG00000198171	DDRGK1	Brain_Spinal_cord_cervical_c-1	5.12208	0.234237	3.02181e-07	5.04644	1.57871	4.50112e-07
ENSG00000145214	DGKQ	Brain_Spinal_cord_cervical_c-1	-5.74117	-0.661834	9.40265e-09	-6.92698	-0.371962	4.29911e-12
ENSG00000169242	EFNA1	Brain_Spinal_cord_cervical_c-1	4.81656	0.0291968	1.46051e-06
ENSG00000120071	KANSL1	Brain_Spinal_cord_cervical_c-1	-4.53575	-0.0648697	5.73997e-06
ENSG00000214401	KANSL1-AS1	Brain_Spinal_cord_cervical_c-1	-9.88173	-0.0715688	4.99627e-23	-7.00106	-0.433316	2.54037e-12
ENSG00000103510	KAT8	Brain_Spinal_cord_cervical_c-1	-4.95185	-0.0271576	7.35102e-07	-5.56122	-0.151464	2.67896e-08
ENSG00000230658	KLHL7-DT	Brain_Spinal_cord_cervical_c-1	-5.10012	-0.0114194	3.39434e-07	-5.06599	-0.0867261	4.06277e-07
ENSG00000176681	LRRC37A	Brain_Spinal_cord_cervical_c-1	-9.21111	-0.0753365	3.22764e-20	-5.08755	-0.429369	3.62715e-07
ENSG00000264589	MAPT-AS1	Brain_Spinal_cord_cervical_c-1	6.14904	0.0401869	7.79541e-10	7.47458	0.386057	7.74526e-14
ENSG00000279685	MAPT-IT1	Brain_Spinal_cord_cervical_c-1	-6.24755	-0.0672766	4.1695e-10
ENSG00000243368	MCCC1-AS1	Brain_Spinal_cord_cervical_c-1	-5.00039	-0.0682833	5.72145e-07	-5.41662	-0.561655	6.07352e-08
ENSG00000138722	MMRN1	Brain_Spinal_cord_cervical_c-1	7.87509	0.0241399	3.40495e-15	8.37312	0.216206	5.61121e-17
ENSG00000136243	NUPL2	Brain_Spinal_cord_cervical_c-1	5.75597	0.109644	8.61466e-09	5.94842	0.314212	2.70742e-09
ENSG00000178226	PRSS36	Brain_Spinal_cord_cervical_c-1	-4.78412	-0.0160549	1.71734e-06
ENSG00000117280	RAB29	Brain_Spinal_cord_cervical_c-1	6.67795	0.0295104	2.42302e-11	6.48767	0.239998	8.71752e-11
ENSG00000127419	TMEM175	Brain_Spinal_cord_cervical_c-1	-6.8002	-0.0953206	1.04475e-11	-6.12283	-0.736579	9.19306e-10
ENSG00000011295	TTC19	Brain_Spinal_cord_cervical_c-1	-5.27519	-0.0465765	1.32617e-07	-5.14648	-0.38638	2.65413e-07
ENSG00000167395	ZNF646	Brain_Spinal_cord_cervical_c-1	-5.67874	-0.368973	1.3569e-08	-5.2827	-0.4614	1.2729e-07
ENSG00000275413	AC002553.2	Brain_Substantia_nigra	-4.67185	-0.0546288	2.98503e-06	-5.02973	-0.394002	4.91181e-07
ENSG00000260911	AC135050.3	Brain_Substantia_nigra	-5.31467	-0.0514724	1.06848e-07	-4.86678	-0.199562	1.13433e-06
ENSG00000170425	ADORA2B	Brain_Substantia_nigra	5.35798	0.0404234	8.41585e-08	5.17768	0.24698	2.24657e-07
ENSG00000185829	ARL17A	Brain_Substantia_nigra	-7.38368	-0.0469438	1.53978e-13
ENSG00000228696	ARL17B	Brain_Substantia_nigra	-9.21111	-0.119126	3.22764e-20
ENSG00000169242	EFNA1	Brain_Substantia_nigra	4.9518	0.0577048	7.35318e-07	4.53024	0.451571	5.89169e-06
ENSG00000189157	FAM47E	Brain_Substantia_nigra	-4.50769	-0.0412264	6.55376e-06	-4.60379	-0.314154	4.14876e-06
ENSG00000099364	FBXL19	Brain_Substantia_nigra	-6.44336	-0.0686445	1.16856e-10
ENSG00000127415	IDUA	Brain_Substantia_nigra	-6.1082	-0.805383	1.00758e-09	-5.43411	-6.40514	5.50706e-08
ENSG00000120071	KANSL1	Brain_Substantia_nigra	-7.31192	-0.077707	2.63357e-13
ENSG00000214401	KANSL1-AS1	Brain_Substantia_nigra	-9.31807	-0.0256148	1.18477e-20	-9.06375	-0.228298	1.26045e-19
ENSG00000103510	KAT8	Brain_Substantia_nigra	-4.92016	-0.0278401	8.6475e-07	-5.54522	-0.145266	2.93586e-08
ENSG00000230658	KLHL7-DT	Brain_Substantia_nigra	-5.13526	-0.0118595	2.81756e-07	-5.10345	-0.0890473	3.33513e-07
ENSG00000176681	LRRC37A	Brain_Substantia_nigra	-9.21111	-0.0597968	3.22764e-20	-6.11114	-0.438854	9.89197e-10
ENSG00000264589	MAPT-AS1	Brain_Substantia_nigra	7.11138	0.0416491	1.14888e-12	7.40973	0.419763	1.26557e-13
ENSG00000279685	MAPT-IT1	Brain_Substantia_nigra	-9.74552	-0.175615	1.92795e-22	-8.89685	-1.50619	5.74526e-19
ENSG00000138722	MMRN1	Brain_Substantia_nigra	8.99812	0.0696723	2.29619e-19	8.14671	0.236225	3.73974e-16
ENSG00000164182	NDUFAF2	Brain_Substantia_nigra	5.74979	0.166476	8.9353e-09	5.59964	1.53101	2.14798e-08
ENSG00000136243	NUPL2	Brain_Substantia_nigra	4.96476	0.0334184	6.87857e-07	5.54709	0.155687	2.90458e-08
ENSG00000117280	RAB29	Brain_Substantia_nigra	6.17731	0.0229192	6.52014e-10	5.97998	0.188877	2.23168e-09
ENSG00000152214	RIT2	Brain_Substantia_nigra	4.66771	0.127225	3.04575e-06	4.8148	1.12094	1.47346e-06
ENSG00000103549	RNF40	Brain_Substantia_nigra	-4.82289	-0.0446108	1.41492e-06	-4.65495	-0.222407	3.24066e-06
ENSG00000103496	STX4	Brain_Substantia_nigra	5.9253	0.130729	3.1173e-09	5.61783	0.927558	1.93373e-08
ENSG00000127419	TMEM175	Brain_Substantia_nigra	-6.8002	-0.105201	1.04475e-11	-6.12283	-0.812929	9.19306e-10
ENSG00000227782	AC002553.1	Colon_Sigmoid	4.93164	0.1922	8.15437e-07	4.90472	1.45474	9.35619e-07
ENSG00000226816	AC005082.1	Colon_Sigmoid	-5.06586	-0.0461567	4.06567e-07	-6.02425	-0.185294	1.69901e-09
ENSG00000260911	AC135050.3	Colon_Sigmoid	-5.96312	-0.116781	2.4746e-09	-5.20247	-0.201028	1.96657e-07
ENSG00000170425	ADORA2B	Colon_Sigmoid	5.27513	0.0306492	1.32659e-07	5.06685	0.135221	4.04461e-07
ENSG00000228696	ARL17B	Colon_Sigmoid	4.69496	0.0284271	2.66654e-06
ENSG00000120088	CRHR1	Colon_Sigmoid	-9.80437	-0.16579	1.07813e-22	-9.53465	-1.5283	1.50397e-21
ENSG00000145214	DGKQ	Colon_Sigmoid	-8.99446	-0.137901	2.37387e-19	-7.13952	-0.197814	9.36579e-13
ENSG00000136235	GPNMB	Colon_Sigmoid	5.14974	0.331747	2.60849e-07
ENSG00000099377	HSD3B7	Colon_Sigmoid	5.1894	0.025579	2.10968e-07
ENSG00000127415	IDUA	Colon_Sigmoid	-6.51835	-0.0441093	7.10856e-11
ENSG00000120071	KANSL1	Colon_Sigmoid	-8.2107	-0.057814	2.199e-16
ENSG00000214401	KANSL1-AS1	Colon_Sigmoid	-9.22474	-0.0257076	2.8424e-20	-8.59878	-0.231568	8.05672e-18
ENSG00000103510	KAT8	Colon_Sigmoid	-4.97157	-0.0256931	6.64145e-07	-5.61121	-0.142156	2.0092e-08
ENSG00000176681	LRRC37A	Colon_Sigmoid	-9.21111	-0.146782	3.22764e-20
ENSG00000088899	LZTS3	Colon_Sigmoid	-5.35864	-0.0479612	8.38517e-08	-5.16169	-0.429515	2.44736e-07
ENSG00000186868	MAPT	Colon_Sigmoid	5.0033	0.0154686	5.63579e-07
ENSG00000279685	MAPT-IT1	Colon_Sigmoid	-9.60059	-0.198125	7.94859e-22	-9.16566	-1.95101	4.9244e-20
ENSG00000243368	MCCC1-AS1	Colon_Sigmoid	-5.08397	-0.0543635	3.69625e-07	-4.94528	-0.453873	7.60333e-07
ENSG00000156873	PHKG2	Colon_Sigmoid	5.84273	1.32011	5.13524e-09	5.38063	1.52804	7.42248e-08
ENSG00000225190	PLEKHM1	Colon_Sigmoid	-8.53576	-0.097602	1.39242e-17	-8.34779	-1.02544	6.95533e-17
ENSG00000156858	PRR14	Colon_Sigmoid	5.44967	0.165784	5.04633e-08	4.88365	0.894131	1.04142e-06
ENSG00000117280	RAB29	Colon_Sigmoid	5.9635	0.016355	2.46893e-09	5.80349	0.135004	6.495e-09
ENSG00000099365	STX1B	Colon_Sigmoid	-5.50083	-0.127911	3.77998e-08	-5.4429	-0.500155	5.24193e-08
ENSG00000127419	TMEM175	Colon_Sigmoid	-6.14466	-0.0799017	8.01335e-10	-5.53077	-0.618503	3.18825e-08
ENSG00000108379	WNT3	Colon_Sigmoid	-7.92995	-0.056315	2.19229e-15	-8.49997	-0.366483	1.89643e-17
ENSG00000167395	ZNF646	Colon_Sigmoid	-5.69017	-0.292304	1.26913e-08	-5.33437	-0.446124	9.5879e-08
ENSG00000167394	ZNF668	Colon_Sigmoid	5.20995	0.492148	1.88895e-07	5.67363	2.80439	1.39799e-08
ENSG00000214941	ZSWIM7	Colon_Sigmoid	-4.86688	-0.0712016	1.13373e-06
ENSG00000226816	AC005082.1	Colon_Transverse	-4.71424	-0.0309536	2.42617e-06	-5.9449	-0.18151	2.76629e-09
ENSG00000260911	AC135050.3	Colon_Transverse	-5.48419	-0.0658921	4.15365e-08	-5.07941	-0.169727	3.78616e-07
ENSG00000170425	ADORA2B	Colon_Transverse	5.27709	0.0317052	1.31249e-07	5.07977	0.143972	3.77898e-07
ENSG00000228696	ARL17B	Colon_Transverse	4.61307	0.029988	3.96767e-06
ENSG00000145214	DGKQ	Colon_Transverse	-8.45835	-0.132237	2.71199e-17	-6.79412	-0.195958	1.08973e-11
ENSG00000099377	HSD3B7	Colon_Transverse	-5.29543	-0.200707	1.18735e-07
ENSG00000127415	IDUA	Colon_Transverse	-5.23219	-0.0308544	1.67513e-07
ENSG00000080854	IGSF9B	Colon_Transverse	-4.65146	-0.0358912	3.29591e-06	-4.94902	-0.236085	7.45885e-07
ENSG00000120071	KANSL1	Colon_Transverse	-8.57762	-0.0872785	9.68567e-18
ENSG00000214401	KANSL1-AS1	Colon_Transverse	-9.27457	-0.027145	1.7833e-20	-8.59725	-0.239416	8.16504e-18
ENSG00000103510	KAT8	Colon_Transverse	-5.10279	-0.0222367	3.34679e-07	-5.68868	-0.133514	1.28024e-08
ENSG00000230658	KLHL7-DT	Colon_Transverse	-5.10849	-0.010516	3.24744e-07	-5.05221	-0.0861981	4.36729e-07
ENSG00000176681	LRRC37A	Colon_Transverse	-9.61025	-0.0408456	7.23708e-22	-6.26666	-0.293283	3.68871e-10
ENSG00000238083	LRRC37A2	Colon_Transverse	-9.19409	-0.030277	3.78199e-20	-7.40248	-0.266344	1.3366e-13
ENSG00000088899	LZTS3	Colon_Transverse	-5.36942	-0.0439763	7.89911e-08	-5.19595	-0.39732	2.03672e-07
ENSG00000243368	MCCC1-AS1	Colon_Transverse	-5.20676	-0.0596967	1.92171e-07	-5.07732	-0.49823	3.82795e-07
ENSG00000138722	MMRN1	Colon_Transverse	8.13082	0.221078	4.26392e-16	7.66932	0.582853	1.72914e-14
ENSG00000225190	PLEKHM1	Colon_Transverse	-8.48919	-0.103747	2.08086e-17	-8.30517	-1.09464	9.96786e-17
ENSG00000151006	PRSS53	Colon_Transverse	4.65797	0.143727	3.19335e-06	4.98194	0.495666	6.29509e-07
ENSG00000117280	RAB29	Colon_Transverse	6.03542	0.0180873	1.58548e-09	5.82071	0.145527	5.85989e-09
ENSG00000099365	STX1B	Colon_Transverse	-5.95282	-0.0709847	2.63566e-09
ENSG00000103496	STX4	Colon_Transverse	-4.85212	-0.085346	1.22151e-06
ENSG00000108379	WNT3	Colon_Transverse	-9.53652	-0.0621485	1.47704e-21	-9.1066	-0.43806	8.50051e-20
ENSG00000167395	ZNF646	Colon_Transverse	-5.49179	-0.27495	3.9788e-08	-5.22505	-0.44318	1.74106e-07
ENSG00000214941	ZSWIM7	Colon_Transverse	-5.36479	-0.918718	8.10433e-08	-5.07178	-8.32808	3.94104e-07
ENSG00000275263	AC135048.3	Liver	5.99496	0.164351	2.03538e-09
ENSG00000170425	ADORA2B	Liver	5.25883	0.0315254	1.44974e-07	5.07325	0.141578	3.91081e-07
ENSG00000185829	ARL17A	Liver	-6.88358	-0.0438698	5.8368e-12
ENSG00000262881	CR936218.2	Liver	9.7198	0.0246145	2.48257e-22	9.36324	0.266749	7.73314e-21
ENSG00000145214	DGKQ	Liver	-8.84266	-0.137629	9.34664e-19	-7.15577	-0.205758	8.3206e-13
ENSG00000136235	GPNMB	Liver	5.49019	0.297596	4.01497e-08	4.99877	1.96094	5.7697e-07
ENSG00000099377	HSD3B7	Liver	6.4885	1.97765	8.66954e-11
ENSG00000214401	KANSL1-AS1	Liver	-9.37885	-0.0557807	6.66979e-21	-8.73215	-0.295752	2.49887e-18
ENSG00000103510	KAT8	Liver	-4.81316	-0.0226256	1.48564e-06	-5.65299	-0.137201	1.57681e-08
ENSG00000230658	KLHL7-DT	Liver	-5.09824	-0.010625	3.42834e-07	-5.04069	-0.0864257	4.63853e-07
ENSG00000156928	MALSU1	Liver	5.42866	0.205787	5.67777e-08	5.39962	1.81611	6.67806e-08
ENSG00000279685	MAPT-IT1	Liver	9.18716	0.0318234	4.03339e-20	8.69636	0.339149	3.42705e-18
ENSG00000138722	MMRN1	Liver	7.28464	0.180062	3.22542e-13	7.48818	0.520328	6.98349e-14
ENSG00000141027	NCOR1	Liver	5.26417	0.148694	1.40822e-07	5.29569	1.06027	1.18569e-07
ENSG00000073969	NSF	Liver	-4.74873	-0.05199	2.047e-06
ENSG00000178226	PRSS36	Liver	-5.17678	-0.0438544	2.25749e-07	-4.79604	-0.331021	1.61829e-06
ENSG00000117280	RAB29	Liver	6.02334	0.0181774	1.70855e-09	-5.0142	-0.104558	5.32544e-07
ENSG00000099381	SETD1A	Liver	-6.17151	-1.25518	6.76406e-10	5.84177	0.150868	5.16498e-09
ENSG00000163479	SSR2	Liver	4.73316	0.0450505	2.21053e-06	-5.60762	-1.1874	2.05127e-08
ENSG00000099365	STX1B	Liver	-5.74487	-0.0760449	9.19931e-09	-5.32305	-0.536218	1.02041e-07
ENSG00000103496	STX4	Liver	-5.67874	-0.176434	1.3569e-08
ENSG00000011295	TTC19	Liver	-5.08087	-0.0226466	3.75719e-07	-5.03098	-0.186984	4.87988e-07
ENSG00000167397	VKORC1	Liver	-5.41962	-0.253991	5.9727e-08	-5.28125	-0.0977994	1.28306e-07
ENSG00000167395	ZNF646	Liver	-5.49806	-0.024316	3.83997e-08	-5.22638	-0.160158	1.72864e-07
ENSG00000214941	ZSWIM7	Liver	-4.86986	-0.0726352	1.11677e-06
ENSG00000226816	AC005082.1	Pancreas	-5.46797	-0.0498915	4.55217e-08
ENSG00000270947	AC025811.1	Pancreas	-4.99524	-0.0135348	5.87639e-07
ENSG00000170425	ADORA2B	Pancreas	5.20406	0.0317174	1.94977e-07	5.03095	0.135948	4.88063e-07
ENSG00000228696	ARL17B	Pancreas	-9.21111	-0.218425	3.22764e-20
ENSG00000099385	BCL7C	Pancreas	-4.88889	-0.296716	1.01407e-06	-5.09088	-1.99804	3.56413e-07
ENSG00000196118	CCDC189	Pancreas	6.07471	0.0500404	1.24214e-09	5.61017	0.429811	2.02124e-08
ENSG00000262372	CR936218.1	Pancreas	9.37641	0.372209	6.82595e-21	8.70341	3.18573	3.22047e-18
ENSG00000145214	DGKQ	Pancreas	-7.91099	-0.106346	2.55351e-15	-7.09952	-0.208513	1.25189e-12
ENSG00000189157	FAM47E	Pancreas	-5.3589	-0.0166382	8.37295e-08	-5.26771	-0.132439	1.38136e-07
ENSG00000127415	IDUA	Pancreas	-6.68501	-0.0506134	2.30915e-11
ENSG00000120071	KANSL1	Pancreas	6.74396	0.161286	1.54122e-11	4.9426	0.321156	7.70862e-07
ENSG00000214401	KANSL1-AS1	Pancreas	-9.42421	-0.0570112	4.33342e-21	-8.69648	-0.301055	3.42353e-18
ENSG00000103510	KAT8	Pancreas	-4.80499	-0.022949	1.54759e-06	-5.66086	-0.136525	1.50619e-08
ENSG00000122550	KLHL7	Pancreas	-4.94833	-0.0280597	7.48543e-07	-4.68661	-0.228652	2.77764e-06
ENSG00000230658	KLHL7-DT	Pancreas	-5.10351	-0.0105344	3.33405e-07	-5.07795	-0.085194	3.81522e-07
ENSG00000238083	LRRC37A2	Pancreas	-9.17444	-0.0313119	4.53938e-20	-7.63514	-0.297271	2.25569e-14
ENSG00000164182	NDUFAF2	Pancreas	5.20829	0.082698	1.90592e-07
ENSG00000136243	NUPL2	Pancreas	5.47597	0.0579186	4.35114e-08	5.677	0.209312	1.37077e-08
ENSG00000156873	PHKG2	Pancreas	5.65715	0.240975	1.53911e-08	5.10471	1.8995	3.31299e-07
ENSG00000225190	PLEKHM1	Pancreas	-8.37104	-0.0851373	5.71112e-17	-7.78054	-0.844535	7.22157e-15
ENSG00000117280	RAB29	Pancreas	6.16514	0.0195918	7.04189e-10	5.96962	0.161321	2.37808e-09
ENSG00000103496	STX4	Pancreas	-5.67874	-0.205626	1.3569e-08	-5.61367	-0.303188	1.98083e-08
ENSG00000127419	TMEM175	Pancreas	-6.80074	-0.069304	1.04082e-11	-5.92081	-0.500366	3.20365e-09
ENSG00000011295	TTC19	Pancreas	-4.73205	-0.0226745	2.22267e-06	-5.03456	-0.169302	4.78941e-07
ENSG00000139722	VPS37B	Pancreas	-5.33967	-0.101505	9.31181e-08
ENSG00000108379	WNT3	Pancreas	-8.60334	-0.0550847	7.74266e-18	-8.54497	-0.265967	1.28572e-17
ENSG00000167395	ZNF646	Pancreas	-4.96162	-0.0861501	6.99091e-07	-5.04051	-0.597458	4.64298e-07
ENSG00000131484	AC091132.1	Pituitary	7.01898	0.254396	2.23492e-12	5.90571	0.322517	3.51134e-09
ENSG00000232748	AC135050.1	Pituitary	5.02209	0.796081	5.11127e-07	5.08361	0.570695	3.7033e-07
ENSG00000260911	AC135050.3	Pituitary	-5.08638	-0.0394739	3.64967e-07	-4.88179	-0.211914	1.05125e-06
ENSG00000170425	ADORA2B	Pituitary	5.16725	0.0310801	2.37561e-07	5.03102	0.161387	4.87887e-07
ENSG00000185829	ARL17A	Pituitary	-7.48304	-0.0314163	7.26244e-14	-7.98334	-0.270609	1.42422e-15
ENSG00000228696	ARL17B	Pituitary	-9.21111	-0.330684	3.22764e-20
ENSG00000196118	CCDC189	Pituitary	5.9464	0.0197381	2.74107e-09	5.46015	0.200018	4.75739e-08
ENSG00000198171	DDRGK1	Pituitary	5.02103	0.111533	5.13965e-07	4.98947	0.793488	6.05436e-07
ENSG00000145214	DGKQ	Pituitary	-6.79705	-0.0964604	1.06784e-11	-7.14633	-0.235694	8.91265e-13
ENSG00000157540	DYRK1A	Pituitary	4.57641	0.495862	4.73013e-06
ENSG00000169242	EFNA1	Pituitary	4.78352	0.0716366	1.72251e-06
ENSG00000127415	IDUA	Pituitary	-6.51477	-0.0621252	7.28027e-11	-5.86058	-0.488185	4.61259e-09
ENSG00000080854	IGSF9B	Pituitary	-4.95195	-0.0588183	7.34728e-07	-5.17485	-0.337904	2.281e-07
ENSG00000120071	KANSL1	Pituitary	-7.07978	-0.0717759	1.44381e-12
ENSG00000214401	KANSL1-AS1	Pituitary	-9.17042	-0.0264317	4.71165e-20	-8.81837	-0.221611	1.1614e-18
ENSG00000103510	KAT8	Pituitary	-4.96428	-0.0289529	6.89572e-07	-5.57139	-0.158669	2.52715e-08
ENSG00000230658	KLHL7-DT	Pituitary	-5.10127	-0.0115557	3.37387e-07	-5.10199	-0.0862815	3.36105e-07
ENSG00000176681	LRRC37A	Pituitary	-9.21111	-0.0362986	3.22764e-20	-7.59438	-0.354875	3.09269e-14
ENSG00000264589	MAPT-AS1	Pituitary	4.59756	0.0378907	4.2746e-06	6.14805	0.459645	7.84399e-10
ENSG00000279685	MAPT-IT1	Pituitary	-8.71056	-0.080474	3.02385e-18	-7.57921	-0.570134	3.4766e-14
ENSG00000243368	MCCC1-AS1	Pituitary	-4.87338	-0.0573447	1.09704e-06	-5.28683	-0.47184	1.24455e-07
ENSG00000138722	MMRN1	Pituitary	8.66481	0.0804672	4.5228e-18	7.91924	0.239211	2.38975e-15
ENSG00000136243	NUPL2	Pituitary	5.39069	0.0321797	7.01879e-08	5.62666	0.15779	1.83735e-08
ENSG00000225190	PLEKHM1	Pituitary	-8.23655	-0.0796921	1.77244e-16	-7.82814	-1.26514	4.95145e-15
ENSG00000156858	PRR14	Pituitary	5.22922	0.114842	1.70231e-07	4.78749	0.705123	1.68882e-06
ENSG00000117280	RAB29	Pituitary	6.15837	0.031471	7.34986e-10	5.81791	0.251339	5.95878e-09
ENSG00000103549	RNF40	Pituitary	-4.97527	-0.0300736	6.51552e-07
ENSG00000127419	TMEM175	Pituitary	-6.78777	-0.0628537	1.13883e-11	-5.49427	-0.39088	3.92326e-08
ENSG00000011295	TTC19	Pituitary	-5.17677	-0.0279456	2.25756e-07	-5.19766	-0.212036	2.0181e-07
ENSG00000167397	VKORC1	Pituitary	5.02642	0.800585	4.99708e-07	4.95352	0.396545	7.28832e-07
ENSG00000108379	WNT3	Pituitary	-8.58707	-0.024719	8.92158e-18	-8.2258	-0.239129	1.93893e-16
ENSG00000214941	ZSWIM7	Pituitary	-5.27291	-0.118276	1.34278e-07	-4.89863	-0.985719	9.65095e-07
ENSG00000226816	AC005082.1	Small_Intestine_Terminal_Ileum	-4.56916	-0.0581583	4.89681e-06	-6.02686	-0.19895	1.67179e-09
ENSG00000275371	AC012645.4	Small_Intestine_Terminal_Ileum	-4.7785	-0.0368238	1.76605e-06
ENSG00000131484	AC091132.1	Small_Intestine_Terminal_Ileum	6.80122	0.148831	1.03739e-11	5.6449	0.282861	1.65279e-08
ENSG00000260911	AC135050.3	Small_Intestine_Terminal_Ileum	-5.2034	-0.0873541	1.95674e-07	-5.02291	-0.182714	5.08945e-07
ENSG00000170425	ADORA2B	Small_Intestine_Terminal_Ileum	5.28485	0.0382566	1.25805e-07	5.06882	0.171271	4.00299e-07
ENSG00000228696	ARL17B	Small_Intestine_Terminal_Ileum	-9.21111	-0.116941	3.22764e-20
ENSG00000163749	CCDC158	Small_Intestine_Terminal_Ileum	-4.941	-0.0327857	7.77228e-07	-4.86614	-0.274817	1.13798e-06
ENSG00000262372	CR936218.1	Small_Intestine_Terminal_Ileum	7.85882	0.141235	3.87771e-15	7.52363	1.25471	5.32758e-14
ENSG00000145214	DGKQ	Small_Intestine_Terminal_Ileum	-9.56532	-0.488772	1.11856e-21	-6.83297	-0.246913	8.31765e-12
ENSG00000232300	FAM215B	Small_Intestine_Terminal_Ileum	-7.37707	-0.0825592	1.61807e-13	-7.18927	-0.807138	6.51393e-13
ENSG00000099377	HSD3B7	Small_Intestine_Terminal_Ileum	-6.19065	-0.31725	5.99161e-10
ENSG00000127415	IDUA	Small_Intestine_Terminal_Ileum	-8.76381	-0.162601	1.88755e-18	-7.88925	-1.29901	3.0401e-15
ENSG00000080854	IGSF9B	Small_Intestine_Terminal_Ileum	-5.06067	-0.0621632	4.17775e-07	-5.11127	-0.464495	3.19995e-07
ENSG00000120071	KANSL1	Small_Intestine_Terminal_Ileum	-5.76427	-0.086945	8.20121e-09
ENSG00000214401	KANSL1-AS1	Small_Intestine_Terminal_Ileum	-9.4057	-0.0548917	5.16873e-21	-8.81936	-0.297622	1.15119e-18
ENSG00000103510	KAT8	Small_Intestine_Terminal_Ileum	-4.97835	-0.0291793	6.41302e-07	-5.53001	-0.162991	3.20216e-08
ENSG00000122550	KLHL7	Small_Intestine_Terminal_Ileum	-4.89029	-0.0524758	1.0069e-06
ENSG00000230658	KLHL7-DT	Small_Intestine_Terminal_Ileum	-5.13728	-0.0108075	2.78744e-07	-5.0729	-0.0850993	3.918e-07
ENSG00000176681	LRRC37A	Small_Intestine_Terminal_Ileum	-9.21111	-0.138527	3.22764e-20
ENSG00000136243	NUPL2	Small_Intestine_Terminal_Ileum	5.27727	0.0511748	1.3112e-07	5.64359	0.206951	1.66539e-08
ENSG00000117280	RAB29	Small_Intestine_Terminal_Ileum	6.10053	0.0187672	1.05718e-09	5.9162	0.15576	3.29472e-09
ENSG00000099381	SETD1A	Small_Intestine_Terminal_Ileum	-5.67874	-98.108	1.3569e-08	-5.32308	-2.04425	1.02026e-07
ENSG00000099365	STX1B	Small_Intestine_Terminal_Ileum	-5.67874	-1.00708	1.3569e-08	-5.17787	-0.793773	2.24438e-07
ENSG00000103496	STX4	Small_Intestine_Terminal_Ileum	-5.67874	-0.229123	1.3569e-08
ENSG00000127419	TMEM175	Small_Intestine_Terminal_Ileum	-6.8002	-0.132672	1.04475e-11	-6.12283	-1.0252	9.19306e-10
ENSG00000011295	TTC19	Small_Intestine_Terminal_Ileum	-4.60624	-0.0178223	4.10014e-06	-4.95522	-0.146839	7.225e-07
ENSG00000108379	WNT3	Small_Intestine_Terminal_Ileum	-7.95762	-0.0571931	1.75378e-15	-8.45199	-0.404207	2.86369e-17
ENSG00000167395	ZNF646	Small_Intestine_Terminal_Ileum	-4.71019	-0.0566836	2.47483e-06	-4.91796	-0.245732	8.74488e-07
ENSG00000167394	ZNF668	Small_Intestine_Terminal_Ileum	5.10378	0.0715497	3.32937e-07	5.39421	0.316563	6.88255e-08
ENSG00000214941	ZSWIM7	Small_Intestine_Terminal_Ileum	-5.27248	-0.0143372	1.3459e-07	-5.02878	-0.120213	4.93617e-07
ENSG00000227782	AC002553.1	Spleen	4.62264	0.134509	3.78889e-06
ENSG00000272308	AC104113.1	Spleen	5.07017	0.0465571	3.97467e-07	5.03825	0.433732	4.69797e-07
ENSG00000260911	AC135050.3	Spleen	-5.36004	-0.0152447	8.3203e-08	-5.25716	-0.139021	1.46294e-07
ENSG00000170425	ADORA2B	Spleen	5.2682	0.0303179	1.37767e-07	5.07815	0.140181	3.81135e-07
ENSG00000228696	ARL17B	Spleen	-9.21111	-0.135233	3.22764e-20
ENSG00000262372	CR936218.1	Spleen	9.25629	0.929528	2.11666e-20	8.93169	9.58883	4.19567e-19
ENSG00000145214	DGKQ	Spleen	-9.3755	-0.0929855	6.88461e-21	-6.94121	-0.153289	3.88754e-12
ENSG00000049167	ERCC8	Spleen	5.28958	0.0305623	1.22598e-07	5.24321	0.283138	1.57809e-07
ENSG00000189157	FAM47E	Spleen	-5.46176	-0.0295016	4.71424e-08	-5.43512	-0.219444	5.47583e-08
ENSG00000089280	FUS	Spleen	-4.98914	-0.279725	6.06478e-07
ENSG00000177628	GBA	Spleen	6.41905	0.0473923	1.37126e-10	5.68781	0.364957	1.28682e-08
ENSG00000136235	GPNMB	Spleen	4.97065	0.202398	6.67277e-07
ENSG00000127415	IDUA	Spleen	-6.63279	-0.0452319	3.29399e-11	-4.74103	-0.268959	2.12638e-06
ENSG00000080854	IGSF9B	Spleen	-4.63582	-0.0331685	3.5553e-06	-4.80358	-0.238406	1.55853e-06
ENSG00000120071	KANSL1	Spleen	-6.33119	-0.0814517	2.43271e-10
ENSG00000214401	KANSL1-AS1	Spleen	-9.31331	-0.0583104	1.23904e-20	-8.66676	-0.293471	4.44581e-18
ENSG00000103510	KAT8	Spleen	-5.02566	-0.029148	5.01699e-07	-5.60347	-0.144529	2.10105e-08
ENSG00000230658	KLHL7-DT	Spleen	-5.08288	-0.0099789	3.71757e-07	-4.99552	-0.0847575	5.86769e-07
ENSG00000176681	LRRC37A	Spleen	-9.21111	-0.149967	3.22764e-20
ENSG00000238083	LRRC37A2	Spleen	-8.6112	-0.0383557	7.23004e-18	-6.6348	-0.291527	3.24946e-11
ENSG00000186868	MAPT	Spleen	-10.0578	-0.0481328	8.48557e-24	-9.76754	-0.503205	1.55171e-22
ENSG00000141027	NCOR1	Spleen	5.02476	0.128101	5.04065e-07	5.17042	0.862687	2.33572e-07
ENSG00000073969	NSF	Spleen	5.03179	0.101228	4.85924e-07	5.1491	1.01388	2.61741e-07
ENSG00000136243	NUPL2	Spleen	5.08833	0.0461763	3.61226e-07	5.54808	0.208693	2.88819e-08
ENSG00000225190	PLEKHM1	Spleen	-8.45071	-0.0628331	2.89528e-17	-8.35101	-0.558902	6.76845e-17
ENSG00000117280	RAB29	Spleen	5.92541	0.0172077	3.11518e-09	5.73569	0.141403	9.71156e-09
ENSG00000103549	RNF40	Spleen	5.80293	0.0237643	6.51671e-09
ENSG00000145335	SNCA	Spleen	5.01403	0.0551424	5.33029e-07	5.58887	0.401713	2.28548e-08
ENSG00000103496	STX4	Spleen	-5.67874	-0.158482	1.3569e-08	-5.31761	-1.13942	1.0514e-07
ENSG00000127419	TMEM175	Spleen	-5.37852	-0.0580077	7.50987e-08	-4.9521	-0.458004	7.34155e-07
ENSG00000108379	WNT3	Spleen	-8.45766	-0.0645943	2.72794e-17	-8.65107	-0.399535	5.10171e-18
ENSG00000167395	ZNF646	Spleen	-4.67963	-0.113197	2.87399e-06	-4.68323	-0.299587	2.82395e-06
ENSG00000214941	ZSWIM7	Spleen	-5.57474	-0.0145746	2.47904e-08	-5.29908	-0.124678	1.16385e-07
ENSG00000275263	AC135048.3	Stomach	6.19709	0.246545	5.75152e-10
ENSG00000260911	AC135050.3	Stomach	-5.71462	-0.0333235	1.09947e-08	-5.00455	-0.154833	5.59922e-07
ENSG00000170425	ADORA2B	Stomach	5.22261	0.02997	1.7642e-07	5.06312	0.138464	4.12459e-07
ENSG00000185829	ARL17A	Stomach	-5.40209	-0.0409013	6.58707e-08
ENSG00000228696	ARL17B	Stomach	4.6147	0.03008	3.93667e-06
ENSG00000196118	CCDC189	Stomach	6.18935	0.0637416	6.04126e-10	5.61917	0.480942	1.91879e-08
ENSG00000138769	CDKL2	Stomach	5.90224	0.158444	3.58602e-09	5.88752	0.820589	3.92045e-09
ENSG00000262372	CR936218.1	Stomach	9.49779	0.363074	2.14399e-21	9.19159	3.66297	3.87062e-20
ENSG00000145214	DGKQ	Stomach	-5.66875	-0.0466195	1.43845e-08	-6.03541	-0.143515	1.58556e-09
ENSG00000143590	EFNA3	Stomach	5.36098	0.375585	8.27712e-08	5.28158	1.46703	1.28075e-07
ENSG00000189157	FAM47E	Stomach	-5.30836	-0.020945	1.10617e-07
ENSG00000136235	GPNMB	Stomach	4.9359	0.61769	7.9782e-07
ENSG00000179344	HLA-DQB1	Stomach	-4.81207	-0.681454	1.49376e-06
ENSG00000127415	IDUA	Stomach	-8.39169	-0.0849307	4.79199e-17	-7.57841	-0.675675	3.49803e-14
ENSG00000214401	KANSL1-AS1	Stomach	-7.46657	-0.0693031	8.23114e-14	-7.68813	-0.339157	1.49299e-14
ENSG00000103510	KAT8	Stomach	-4.91814	-0.0239879	8.73705e-07	-5.64505	-0.137458	1.65134e-08
ENSG00000122550	KLHL7	Stomach	-5.13903	-0.0569622	2.76158e-07	-5.72691	-0.463177	1.02274e-08
ENSG00000230658	KLHL7-DT	Stomach	-5.08094	-0.0105781	3.75568e-07	-5.04625	-0.0853944	4.50565e-07
ENSG00000176681	LRRC37A	Stomach	-9.21111	-0.15148	3.22764e-20
ENSG00000238083	LRRC37A2	Stomach	-9.19931	-0.032232	3.60252e-20	-7.43219	-0.286975	1.06816e-13
ENSG00000088899	LZTS3	Stomach	-5.39782	-0.0483973	6.74542e-08	-5.20594	-0.436272	1.93012e-07
ENSG00000138722	MMRN1	Stomach	8.11776	0.219571	4.74856e-16	7.67976	0.572401	1.5939e-14
ENSG00000073969	NSF	Stomach	4.86277	0.0843507	1.15757e-06	5.05016	0.772676	4.41446e-07
ENSG00000136243	NUPL2	Stomach	5.1305	0.0489986	2.88974e-07	5.57553	0.213045	2.46782e-08
ENSG00000225190	PLEKHM1	Stomach	-8.52277	-0.1005	1.55786e-17	-8.3362	-1.05915	7.67132e-17
ENSG00000156858	PRR14	Stomach	5.43377	0.179413	5.51768e-08	4.85768	0.878202	1.18769e-06
ENSG00000117280	RAB29	Stomach	5.96863	0.017192	2.39252e-09	5.74422	0.138943	9.23444e-09
ENSG00000099381	SETD1A	Stomach	-4.83166	-0.0433805	1.35398e-06
ENSG00000107295	SH3GL2	Stomach	5.03086	0.0285239	4.88277e-07
ENSG00000099365	STX1B	Stomach	-5.71204	-0.0508532	1.1163e-08	-5.61467	-0.399725	1.96938e-08
ENSG00000011295	TTC19	Stomach	-5.23857	-0.0552779	1.61824e-07	-5.11575	-0.457043	3.125e-07
ENSG00000108379	WNT3	Stomach	-8.57202	-0.065255	1.01681e-17	-8.66674	-0.4062	4.44665e-18
ENSG00000167394	ZNF668	Stomach	5.20995	0.512221	1.88895e-07	5.71048	2.51681	1.1266e-08
ENSG00000260911	AC135050.3	Whole_Blood	-4.78661	-0.0500131	1.69624e-06	-5.05252	-0.177456	4.36026e-07
ENSG00000145214	DGKQ	Whole_Blood	-7.69265	-0.0504289	1.44117e-14	-6.18971	-0.123986	6.02732e-10
ENSG00000136235	GPNMB	Whole_Blood	6.04877	0.108335	1.45957e-09	5.74068	0.85195	9.42946e-09
ENSG00000127415	IDUA	Whole_Blood	-6.34475	-0.0413288	2.22786e-10
ENSG00000080854	IGSF9B	Whole_Blood	-4.81332	-0.0380169	1.48443e-06	-5.05941	-0.246097	4.20558e-07
ENSG00000120071	KANSL1	Whole_Blood	-7.8279	-0.0550576	4.9609e-15
ENSG00000214401	KANSL1-AS1	Whole_Blood	-9.40951	-0.0562899	4.98457e-21	-8.21688	-0.313695	2.08869e-16
ENSG00000103510	KAT8	Whole_Blood	-4.92288	-0.0318354	8.52806e-07	-5.43196	-0.204219	5.57381e-08
ENSG00000122550	KLHL7	Whole_Blood	-5.01312	-0.0445221	5.35532e-07	-4.61656	-0.325187	3.90155e-06
ENSG00000176681	LRRC37A	Whole_Blood	-9.21111	-1.5984	3.22764e-20
ENSG00000238083	LRRC37A2	Whole_Blood	-5.91843	-0.0306668	3.25029e-09
ENSG00000136243	NUPL2	Whole_Blood	5.33792	0.0634734	9.4021e-08	5.64323	0.252954	1.66888e-08
ENSG00000151006	PRSS53	Whole_Blood	5.48615	0.0689733	4.10778e-08	5.5034	0.435665	3.72546e-08
ENSG00000117280	RAB29	Whole_Blood	4.95817	0.0172081	7.116e-07	4.82117	0.138706	1.42721e-06
ENSG00000138760	SCARB2	Whole_Blood	5.92721	0.0298195	3.08131e-09	5.95594	0.239312	2.58574e-09
ENSG00000099381	SETD1A	Whole_Blood	-6.21417	-0.213533	5.15974e-10	-6.44771	-0.906677	1.13549e-10
ENSG00000103496	STX4	Whole_Blood	-5.67874	-0.351634	1.3569e-08
ENSG00000011295	TTC19	Whole_Blood	-5.23857	-0.045253	1.61824e-07	-5.11575	-0.374157	3.125e-07
ENSG00000108379	WNT3	Whole_Blood	-7.34545	-0.0537643	2.05074e-13	-8.09486	-0.407277	5.73298e-16
ENSG00000167394	ZNF668	Whole_Blood	5.77765	0.379065	7.57497e-09	5.57664	0.731032	2.45204e-08
